# Supplementary material for: Transposon mutagenesis screen in Klebsiella pneumoniae identifies genetic determinants required for growth in human urine and serum
Source: eLife. 2024 Aug 27;12:RP88971. doi: 10.7554/eLife.88971 (PMC11349299; doi:10.7554/eLife.88971)
Supplement: Figure 1—source data 1. [file elife-88971-fig1-data1.xlsx]

## Sheet: Table S1_Essential gene table
Figure 1-source data 1: Essential gene table ECL8
GFF_gene_name	Gene_name	locus_tag	Insertion_index_score	Log_likelihood	Essential	Non-essential	Unclear
dnaA	dnaA	ecl8_00001	0	-172.701	TRUE	FALSE	FALSE
dnaN	dnaN	ecl8_00002	0.00363306	-19.1428	TRUE	FALSE	FALSE
recF_1	recF_1	ecl8_00003	0.148045	16.584	FALSE	TRUE	FALSE
gyrB	gyrB	ecl8_00004	0.00124224	-26.828	TRUE	FALSE	FALSE
yidA	yidA	ecl8_00005	0.154982	17.3726	FALSE	TRUE	FALSE
ecl8_00006	ecl8_00006	ecl8_00006	0.134652	15.0165	FALSE	TRUE	FALSE
ecl8_00007	ecl8_00007	ecl8_00007	0.137566	15.3631	FALSE	TRUE	FALSE
lutR	lutR	ecl8_00008	0.101449	10.7936	FALSE	TRUE	FALSE
dgoK1_1	dgoK1_1	ecl8_00009	0.0830489	8.15026	FALSE	TRUE	FALSE
dgoA	dgoA_1	ecl8_00010	0.127832	14.1924	FALSE	TRUE	FALSE
dgoD	dgoD	ecl8_00011	0.295909	31.4055	FALSE	TRUE	FALSE
dgoT	dgoT_1	ecl8_00012	0.191802	21.3487	FALSE	TRUE	FALSE
ecl8_00013	ecl8_00013	ecl8_00013	0.138549	15.4792	FALSE	TRUE	FALSE
ecl8_00014	ecl8_00014	ecl8_00014	0.18018	20.1272	FALSE	TRUE	FALSE
ibpA_1	ibpA_1	ecl8_00015	0.178744	19.9743	FALSE	TRUE	FALSE
ibpB	ibpB	ecl8_00016	0.2331	25.4994	FALSE	TRUE	FALSE
ecl8_00017	ecl8_00017	ecl8_00017	0.143939	16.1101	FALSE	TRUE	FALSE
ecl8_00018	ecl8_00018	ecl8_00018	0.216374	23.8501	FALSE	TRUE	FALSE
aspT_1	aspT_1	ecl8_00019	0.141998	15.884	FALSE	TRUE	FALSE
mngR_1	mngR_1	ecl8_00020	0.11065	12.0224	FALSE	TRUE	FALSE
malP_1	malP_1	ecl8_00021	0.118299	13.0066	FALSE	TRUE	FALSE
aglB	aglB	ecl8_00022	0.0914588	9.39338	FALSE	TRUE	FALSE
yidH	yidH	ecl8_00023	0.112069	12.2073	FALSE	TRUE	FALSE
yidG	yidG	ecl8_00024	0.0853994	8.50437	FALSE	TRUE	FALSE
chuR_1	chuR_1	ecl8_00025	0.11976	13.1911	FALSE	TRUE	FALSE
dsdA	dsdA	ecl8_00026	0.10459	11.219	FALSE	TRUE	FALSE
dsdX	dsdX	ecl8_00027	0.116592	12.7896	FALSE	TRUE	FALSE
dsdC_1	dsdC_1	ecl8_00028	0.106061	11.416	FALSE	TRUE	FALSE
emrD	emrD	ecl8_00029	0.132489	14.7573	FALSE	TRUE	FALSE
ecl8_00030	ecl8_00030	ecl8_00030	0.139089	15.5428	FALSE	TRUE	FALSE
ecl8_00031	ecl8_00031	ecl8_00031	0.138702	15.4973	FALSE	TRUE	FALSE
ecl8_00032	ecl8_00032	ecl8_00032	0.166667	18.6698	FALSE	TRUE	FALSE
ecl8_00033	ecl8_00033	ecl8_00033	0.28125	30.0612	FALSE	TRUE	FALSE
ilvB	ilvB	ecl8_00034	0.139136	15.5484	FALSE	TRUE	FALSE
ilvN	ilvN	ecl8_00035	0.131944	14.6916	FALSE	TRUE	FALSE
uhpA_1	uhpA_1	ecl8_00036	0.0993266	10.5023	FALSE	TRUE	FALSE
uhpB	uhpB	ecl8_00037	0.136394	15.224	FALSE	TRUE	FALSE
uhpC	uhpC	ecl8_00038	0.116629	12.7943	FALSE	TRUE	FALSE
uhpT	uhpT	ecl8_00039	0.121408	13.398	FALSE	TRUE	FALSE
ecl8_00040	ecl8_00040	ecl8_00040	0.15011	16.8204	FALSE	TRUE	FALSE
higA-2	higA-2	ecl8_00041	0.117284	12.8777	FALSE	TRUE	FALSE
ecl8_00042	ecl8_00042	ecl8_00042	0.213889	23.6015	FALSE	TRUE	FALSE
nepI_1	nepI_1	ecl8_00043	0.11474	12.5526	FALSE	TRUE	FALSE
phnX	phnX	ecl8_00044	0.108642	11.7586	FALSE	TRUE	FALSE
phnW	phnW	ecl8_00045	0.109601	11.8849	FALSE	TRUE	FALSE
phnR	phnR	ecl8_00046	0.116667	12.7991	FALSE	TRUE	FALSE
phnS	phnS	ecl8_00047	0.11144	12.1255	FALSE	TRUE	FALSE
phnT	phnT	ecl8_00048	0.0979335	10.3093	FALSE	TRUE	FALSE
phnU	phnU	ecl8_00049	0.140534	15.7128	FALSE	TRUE	FALSE
phnV_1	phnV_1	ecl8_00050	0.0977444	10.283	FALSE	TRUE	FALSE
lamB_1	lamB_1	ecl8_00051	0.177536	19.8453	FALSE	TRUE	FALSE
chbA_1	chbA_1	ecl8_00052	0.247525	26.8926	FALSE	TRUE	FALSE
licC_1	licC_1	ecl8_00053	0.166289	18.6284	FALSE	TRUE	FALSE
celA_1	celA_1	ecl8_00054	0.177778	19.8712	FALSE	TRUE	FALSE
ascG_1	ascG_1	ecl8_00055	0.124868	13.8282	FALSE	TRUE	FALSE
pcaK_1	pcaK_1	ecl8_00056	0.10795	11.6672	FALSE	TRUE	FALSE
galA_1	galA_1	ecl8_00057	0.111111	12.0826	FALSE	TRUE	FALSE
galA_2	galA_2	ecl8_00058	0.0978836	10.3024	FALSE	TRUE	FALSE
gbpR_1	gbpR_1	ecl8_00059	0.140994	15.7667	FALSE	TRUE	FALSE
galB	galB	ecl8_00060	0.139001	15.5326	FALSE	TRUE	FALSE
galC	galC	ecl8_00061	0.134454	14.9928	FALSE	TRUE	FALSE
galD	galD	ecl8_00062	0.105893	11.3937	FALSE	TRUE	FALSE
mmsB_1	mmsB_1	ecl8_00063	0.104167	11.1621	FALSE	TRUE	FALSE
ecl8_00064	ecl8_00064	ecl8_00064	0.106529	11.4785	FALSE	TRUE	FALSE
yicL	yicL	ecl8_00065	0.128461	14.2692	FALSE	TRUE	FALSE
murP	murP	ecl8_00066	0.106695	11.5005	FALSE	TRUE	FALSE
murQ_1	murQ_1	ecl8_00067	0.120709	13.3103	FALSE	TRUE	FALSE
bcr_1	bcr_1	ecl8_00068	0.109966	11.9327	FALSE	TRUE	FALSE
oprM_1	oprM_1	ecl8_00069	0.0849817	8.44183	FALSE	TRUE	FALSE
mexB	mexB	ecl8_00070	0.119048	13.1012	FALSE	TRUE	FALSE
mexA	mexA	ecl8_00071	0.155556	17.4372	FALSE	TRUE	FALSE
ecl8_00072	ecl8_00072	ecl8_00072	0.258993	27.9831	FALSE	TRUE	FALSE
ecl8_00073	ecl8_00073	ecl8_00073	0.144033	16.121	FALSE	TRUE	FALSE
luxR	luxR	ecl8_00074	0.104938	11.2658	FALSE	TRUE	FALSE
bmr3	bmr3	ecl8_00075	0.11178	12.1698	FALSE	TRUE	FALSE
dmlR_1	dmlR_1	ecl8_00076	0.0797814	7.64862	FALSE	TRUE	FALSE
ecl8_00077	ecl8_00077	ecl8_00077	0.102073	10.8786	FALSE	TRUE	FALSE
ecl8_00078	ecl8_00078	ecl8_00078	0.110403	11.9901	FALSE	TRUE	FALSE
ecl8_00079	ecl8_00079	ecl8_00079	0.111732	12.1635	FALSE	TRUE	FALSE
rclR_1	rclR_1	ecl8_00080	0.103753	11.1062	FALSE	TRUE	FALSE
nlpA	nlpA	ecl8_00081	0.134568	15.0065	FALSE	TRUE	FALSE
ecl8_00082	ecl8_00082	ecl8_00082	0.134503	14.9987	FALSE	TRUE	FALSE
act	act	ecl8_00083	0.128342	14.2548	FALSE	TRUE	FALSE
ecl8_00084	ecl8_00084	ecl8_00084	0.108974	11.8024	FALSE	TRUE	FALSE
cdhR_1	cdhR_1	ecl8_00085	0.091195	9.35534	FALSE	TRUE	FALSE
yahK	yahK	ecl8_00086	0.127619	14.1664	FALSE	TRUE	FALSE
ecl8_00087	ecl8_00087	ecl8_00087	0.261803	28.2481	FALSE	TRUE	FALSE
ycnE	ycnE	ecl8_00088	0.147766	16.552	FALSE	TRUE	FALSE
ecl8_00089	ecl8_00089	ecl8_00089	0.130952	14.5718	FALSE	TRUE	FALSE
ecl8_00090	ecl8_00090	ecl8_00090	0.0940171	9.75923	FALSE	TRUE	FALSE
yicJ_1	yicJ_1	ecl8_00092	0.111111	12.0826	FALSE	TRUE	FALSE
yicI	yicI	ecl8_00093	0.126348	14.0105	FALSE	TRUE	FALSE
glvR_1	glvR_1	ecl8_00094	0.123098	13.6088	FALSE	TRUE	FALSE
bglT	bglT	ecl8_00095	0.174638	19.5346	FALSE	TRUE	FALSE
malP_2	malP_2	ecl8_00096	0.248718	27.0067	FALSE	TRUE	FALSE
ecl8_00097	ecl8_00097	ecl8_00097	0.132867	14.8027	FALSE	TRUE	FALSE
xanP_1	xanP_1	ecl8_00098	0.109914	11.9259	FALSE	TRUE	FALSE
gltS	gltS	ecl8_00099	0.129676	14.4171	FALSE	TRUE	FALSE
glpK_1	glpK_1	ecl8_00100	0.12037	13.2679	FALSE	TRUE	FALSE
glpF_1	glpF_1	ecl8_00101	0.146714	16.4309	FALSE	TRUE	FALSE
zapB	zapB	ecl8_00102	0.158333	17.7485	FALSE	TRUE	FALSE
sbp	sbp	ecl8_00103	0.133333	14.8586	FALSE	TRUE	FALSE
cdh	cdh	ecl8_00104	0.121569	13.4181	FALSE	TRUE	FALSE
ecl8_00105	ecl8_00105	ecl8_00105	0.111111	12.0826	FALSE	TRUE	FALSE
tpiA	tpiA	ecl8_00106	0.106771	11.5107	FALSE	TRUE	FALSE
ecl8_00107	ecl8_00107	ecl8_00107	0.131012	14.579	FALSE	TRUE	FALSE
ecl8_00108	ecl8_00108	ecl8_00108	0.130536	14.5215	FALSE	TRUE	FALSE
fpr	fpr	ecl8_00109	0.147256	16.4933	FALSE	TRUE	FALSE
glpX	glpX	ecl8_00110	0.111771	12.1685	FALSE	TRUE	FALSE
recG	recG	ecl8_00111	0.112392	12.2493	FALSE	TRUE	FALSE
trmH	trmH	ecl8_00112	0.133333	14.8586	FALSE	TRUE	FALSE
spoT	spoT	ecl8_00113	0.068364	5.79625	FALSE	TRUE	FALSE
rpoZ	rpoZ	ecl8_00114	0.126812	14.0675	FALSE	TRUE	FALSE
gmk	gmk	ecl8_00115	0.00160256	-25.0181	TRUE	FALSE	FALSE
ligB	ligB	ecl8_00116	0.119261	13.1281	FALSE	TRUE	FALSE
ecl8_00117	ecl8_00117	ecl8_00117	0.205502	22.7558	FALSE	TRUE	FALSE
clcA_1	clcA_1	ecl8_00118	0.132694	14.7818	FALSE	TRUE	FALSE
ada_1	ada_1	ecl8_00119	0.15864	17.7828	FALSE	TRUE	FALSE
ecl8_00120	ecl8_00120	ecl8_00120	0.274431	29.4295	FALSE	TRUE	FALSE
ecl8_00121	ecl8_00121	ecl8_00121	0.258102	27.8989	FALSE	TRUE	FALSE
ecl8_00122	ecl8_00122	ecl8_00122	0.042328	0.680314	FALSE	FALSE	TRUE
ecl8_00123	ecl8_00123	ecl8_00123	0.115942	12.7066	FALSE	TRUE	FALSE
ybhF_1	ybhF_1	ecl8_00124	0.297386	31.5399	FALSE	TRUE	FALSE
ybhR_1	ybhR_1	ecl8_00125	0.314155	33.0547	FALSE	TRUE	FALSE
rph	rph	ecl8_00126	0.223152	24.5231	FALSE	TRUE	FALSE
pyrE_1	pyrE_1	ecl8_00127	0.119938	13.2134	FALSE	TRUE	FALSE
gnl	gnl	ecl8_00128	0.152409	17.0818	FALSE	TRUE	FALSE
slmA	slmA	ecl8_00129	0.128978	14.3323	FALSE	TRUE	FALSE
dut	dut	ecl8_00130	0.0043573	-17.8195	TRUE	FALSE	FALSE
coaBC	coaBC	ecl8_00131	0.00164204	-24.8448	TRUE	FALSE	FALSE
ecl8_00132	ecl8_00132	ecl8_00132	0.124625	13.7981	FALSE	TRUE	FALSE
rpmB	rpmB	ecl8_00133	0	-172.701	TRUE	FALSE	FALSE
rpmG	rpmG	ecl8_00134	0.0119048	-10.2639	TRUE	FALSE	FALSE
mutM	mutM	ecl8_00135	0.140741	15.737	FALSE	TRUE	FALSE
coaD	coaD	ecl8_00136	0.00625	-15.1628	TRUE	FALSE	FALSE
ecl8_00137	ecl8_00137	ecl8_00137	0.0772201	7.2472	FALSE	TRUE	FALSE
waaA	waaA	ecl8_00138	0.00470588	-17.2564	TRUE	FALSE	FALSE
epsJ_1	epsJ_1	ecl8_00139	0.136364	15.2204	FALSE	TRUE	FALSE
pglJ	pglJ	ecl8_00140	0.114155	12.4773	FALSE	TRUE	FALSE
rfaG	rfaG	ecl8_00141	0.0336879	-1.50274	FALSE	FALSE	TRUE
rfaQ	rfaQ	ecl8_00142	0.108635	11.7577	FALSE	TRUE	FALSE
ecl8_00143	ecl8_00143	ecl8_00143	0.183438	20.4724	FALSE	TRUE	FALSE
epsJ_2	epsJ_2	ecl8_00144	0.384146	39.1823	FALSE	TRUE	FALSE
rfaL	rfaL	ecl8_00145	0.323741	33.9115	FALSE	TRUE	FALSE
ecl8_00146	ecl8_00146	ecl8_00146	0.283035	30.2259	FALSE	TRUE	FALSE
rfaC	rfaC	ecl8_00147	0.046729	1.67044	FALSE	FALSE	TRUE
rfaF	rfaF	ecl8_00148	0.0107843	-11.0325	TRUE	FALSE	FALSE
hldD	hldD	ecl8_00149	0.017149	-7.35141	TRUE	FALSE	FALSE
kbl	kbl	ecl8_00150	0.145729	16.3173	FALSE	TRUE	FALSE
tdh	tdh	ecl8_00151	0.143275	16.0329	FALSE	TRUE	FALSE
ecl8_00152	ecl8_00152	ecl8_00152	0.1673	18.7391	FALSE	TRUE	FALSE
ecl8_00153	ecl8_00153	ecl8_00153	0.144201	16.1404	FALSE	TRUE	FALSE
envC	envC	ecl8_00154	0.156722	17.5682	FALSE	TRUE	FALSE
gpmI	gpmI	ecl8_00155	0.128155	14.2319	FALSE	TRUE	FALSE
yibN	yibN	ecl8_00156	0.217593	23.9715	FALSE	TRUE	FALSE
grxC	grxC	ecl8_00157	0.194444	21.6228	FALSE	TRUE	FALSE
secB	secB	ecl8_00158	0.0277778	-3.25356	FALSE	FALSE	TRUE
gpsA	gpsA	ecl8_00159	0.0784314	7.43797	FALSE	TRUE	FALSE
cysE	cysE	ecl8_00160	0.0206813	-5.80022	TRUE	FALSE	FALSE
ecl8_00161	ecl8_00161	ecl8_00161	0.356234	36.7721	FALSE	TRUE	FALSE
ecl8_00162	ecl8_00162	ecl8_00162	0.287356	30.6234	FALSE	TRUE	FALSE
trmL	trmL	ecl8_00163	0.135021	15.0606	FALSE	TRUE	FALSE
lldD_1	lldD_1	ecl8_00164	0.111392	12.1193	FALSE	TRUE	FALSE
lldR_1	lldR_1	ecl8_00165	0.124031	13.7246	FALSE	TRUE	FALSE
lldP	lldP	ecl8_00166	0.147343	16.5034	FALSE	TRUE	FALSE
yibL	yibL	ecl8_00167	0.15427	17.2924	FALSE	TRUE	FALSE
ecl8_00168	ecl8_00168	ecl8_00168	0.177778	19.8712	FALSE	TRUE	FALSE
mtlR	mtlR	ecl8_00169	0.167504	18.7614	FALSE	TRUE	FALSE
mtlD	mtlD	ecl8_00170	0.13577	15.1499	FALSE	TRUE	FALSE
mtlA	mtlA	ecl8_00171	0.120021	13.2239	FALSE	TRUE	FALSE
yibF_1	yibF_1	ecl8_00172	0.131363	14.6215	FALSE	TRUE	FALSE
selA	selA	ecl8_00173	0.102232	10.9002	FALSE	TRUE	FALSE
selB	selB	ecl8_00174	0.10532	11.317	FALSE	TRUE	FALSE
cooF	cooF	ecl8_00175	0.0864198	8.65641	FALSE	TRUE	FALSE
avtA	avtA	ecl8_00176	0.124105	13.7338	FALSE	TRUE	FALSE
malS	malS	ecl8_00177	0.120944	13.3398	FALSE	TRUE	FALSE
ecl8_00178	ecl8_00178	ecl8_00178	0.20922	23.1321	FALSE	TRUE	FALSE
xylR	xylR	ecl8_00179	0.139101	15.5443	FALSE	TRUE	FALSE
xylH_1	xylH_1	ecl8_00180	0.0922166	9.5023	FALSE	TRUE	FALSE
xylG_1	xylG_1	ecl8_00181	0.140078	15.6592	FALSE	TRUE	FALSE
xylF_1	xylF_1	ecl8_00182	0.23996	26.1651	FALSE	TRUE	FALSE
xylA_1	xylA_1	ecl8_00183	0.153439	17.1985	FALSE	TRUE	FALSE
xylB_1	xylB_1	ecl8_00184	0.124399	13.7702	FALSE	TRUE	FALSE
yiaB	yiaB	ecl8_00185	0.112903	12.3156	FALSE	TRUE	FALSE
yiaA	yiaA	ecl8_00186	0.173423	19.4038	FALSE	TRUE	FALSE
wecH	wecH	ecl8_00187	0.190763	21.2406	FALSE	TRUE	FALSE
ecl8_00188	ecl8_00188	ecl8_00188	0.138614	15.4869	FALSE	TRUE	FALSE
glyQ	glyQ	ecl8_00189	0	-172.701	TRUE	FALSE	FALSE
glyS	glyS	ecl8_00190	0.00338164	-19.6625	TRUE	FALSE	FALSE
ecl8_00191	ecl8_00191	ecl8_00191	0.37451	38.3547	FALSE	TRUE	FALSE
ecl8_00192	ecl8_00192	ecl8_00192	0.340909	35.4309	FALSE	TRUE	FALSE
ecl8_00193	ecl8_00193	ecl8_00193	0.34573	35.8543	FALSE	TRUE	FALSE
ecl8_00194	ecl8_00194	ecl8_00194	0.307116	32.4214	FALSE	TRUE	FALSE
ecl8_00195	ecl8_00195	ecl8_00195	0.417695	42.0305	FALSE	TRUE	FALSE
ecl8_00196	ecl8_00196	ecl8_00196	0.410697	41.4404	FALSE	TRUE	FALSE
hokA_1	hokA_1	ecl8_00197	0.261438	28.2137	FALSE	TRUE	FALSE
yheS_1	yheS_1	ecl8_00198	0.135802	15.1537	FALSE	TRUE	FALSE
cspA	cspA	ecl8_00199	0.220657	24.2762	FALSE	TRUE	FALSE
ecl8_00200	ecl8_00200	ecl8_00200	0.264605	28.5116	FALSE	TRUE	FALSE
pcaK_2	pcaK_2	ecl8_00201	0.138643	15.4903	FALSE	TRUE	FALSE
ecl8_00202	ecl8_00202	ecl8_00202	0.153305	17.1833	FALSE	TRUE	FALSE
ghrB	ghrB	ecl8_00203	0.12037	13.2679	FALSE	TRUE	FALSE
ttuB_1	ttuB_1	ecl8_00204	0.144418	16.1657	FALSE	TRUE	FALSE
kdgK_1	kdgK_1	ecl8_00205	0.090812	9.30002	FALSE	TRUE	FALSE
ecl8_00206	ecl8_00206	ecl8_00206	0.0986667	10.411	FALSE	TRUE	FALSE
kdgR_1	kdgR_1	ecl8_00207	0.117011	12.843	FALSE	TRUE	FALSE
yiaD	yiaD	ecl8_00208	0.143288	16.0344	FALSE	TRUE	FALSE
bisC	bisC	ecl8_00209	0.102531	10.9409	FALSE	TRUE	FALSE
yjaB_1	yjaB_1	ecl8_00210	0.111111	12.0826	FALSE	TRUE	FALSE
tag	tag	ecl8_00211	0.151203	16.9448	FALSE	TRUE	FALSE
ecl8_00212	ecl8_00212	ecl8_00212	0.234109	25.5976	FALSE	TRUE	FALSE
yhjX	yhjX	ecl8_00213	0.171642	19.2113	FALSE	TRUE	FALSE
eptB	eptB	ecl8_00214	0.143369	16.0439	FALSE	TRUE	FALSE
ecl8_00215	ecl8_00215	ecl8_00215	0.113262	12.3619	FALSE	TRUE	FALSE
ecl8_00217	ecl8_00217	ecl8_00217	0.347328	35.9944	FALSE	TRUE	FALSE
ecl8_00218	ecl8_00218	ecl8_00218	0.287356	30.6234	FALSE	TRUE	FALSE
dppA_1	dppA_1	ecl8_00219	0.241915	26.3538	FALSE	TRUE	FALSE
dppB_1	dppB_1	ecl8_00220	0.117647	12.9239	FALSE	TRUE	FALSE
dppC	dppC	ecl8_00221	0.122924	13.5871	FALSE	TRUE	FALSE
dppD_1	dppD_1	ecl8_00222	0.14126	15.7978	FALSE	TRUE	FALSE
oppF_1	oppF_1	ecl8_00223	0.158777	17.798	FALSE	TRUE	FALSE
ecl8_00224	ecl8_00224	ecl8_00224	0.185185	20.6566	FALSE	TRUE	FALSE
bcsQ_1	bcsQ_1	ecl8_00225	0.160448	17.984	FALSE	TRUE	FALSE
acsAB	acsAB	ecl8_00226	0.125473	13.9029	FALSE	TRUE	FALSE
bcsB_1	bcsB_1	ecl8_00227	0.107964	11.669	FALSE	TRUE	FALSE
acsC	acsC	ecl8_00228	0.106834	11.5192	FALSE	TRUE	FALSE
acsD	acsD	ecl8_00229	0.140461	15.7042	FALSE	TRUE	FALSE
ecl8_00230	ecl8_00230	ecl8_00230	0.142715	15.9677	FALSE	TRUE	FALSE
ecl8_00231	ecl8_00231	ecl8_00231	0.11131	12.1085	FALSE	TRUE	FALSE
ecl8_00232	ecl8_00232	ecl8_00232	0.131313	14.6154	FALSE	TRUE	FALSE
bcsE	bcsE	ecl8_00233	0.232304	25.4217	FALSE	TRUE	FALSE
yhjR	yhjR	ecl8_00234	0.328042	34.294	FALSE	TRUE	FALSE
bcsQ_2	bcsQ_2	ecl8_00235	0.193989	21.5756	FALSE	TRUE	FALSE
bcsA	bcsA	ecl8_00236	0.132645	14.776	FALSE	TRUE	FALSE
bcsB_2	bcsB_2	ecl8_00237	0.114409	12.5099	FALSE	TRUE	FALSE
bcsZ	bcsZ	ecl8_00238	0.117117	12.8565	FALSE	TRUE	FALSE
bcsC	bcsC	ecl8_00239	0.11092	12.0576	FALSE	TRUE	FALSE
pdeK	pdeK	ecl8_00240	0.112108	12.2124	FALSE	TRUE	FALSE
dctA_1	dctA_1	ecl8_00241	0.130536	14.5215	FALSE	TRUE	FALSE
yhjJ	yhjJ	ecl8_00242	0.137725	15.3818	FALSE	TRUE	FALSE
kdgK_2	kdgK_2	ecl8_00243	0.0924731	9.53907	FALSE	TRUE	FALSE
ecl8_00244	ecl8_00244	ecl8_00244	0.0774854	7.28913	FALSE	TRUE	FALSE
yhjE_1	yhjE_1	ecl8_00245	0.108844	11.7852	FALSE	TRUE	FALSE
yhjD	yhjD	ecl8_00246	0.0968992	10.1652	FALSE	TRUE	FALSE
dmlR_2	dmlR_2	ecl8_00247	0.101111	10.7474	FALSE	TRUE	FALSE
fabG_1	fabG_1	ecl8_00248	0.083004	8.14344	FALSE	TRUE	FALSE
speG_1	speG_1	ecl8_00249	0.093633	9.70463	FALSE	TRUE	FALSE
treF	treF	ecl8_00250	0.102238	10.9011	FALSE	TRUE	FALSE
adh1_1	adh1_1	ecl8_00251	0.109715	11.8999	FALSE	TRUE	FALSE
gstB_1	gstB_1	ecl8_00252	0.108974	11.8024	FALSE	TRUE	FALSE
gor	gor	ecl8_00253	0.11456	12.5294	FALSE	TRUE	FALSE
rlmJ	rlmJ	ecl8_00254	0.11981	13.1974	FALSE	TRUE	FALSE
phoC_1	phoC_1	ecl8_00255	0.118711	13.0587	FALSE	TRUE	FALSE
prlC	prlC	ecl8_00256	0.141948	15.8782	FALSE	TRUE	FALSE
rsmJ	rsmJ	ecl8_00257	0.103586	11.0837	FALSE	TRUE	FALSE
dtpB	dtpB	ecl8_00258	0.187373	20.8864	FALSE	TRUE	FALSE
uspA_1	uspA_1	ecl8_00259	0.40411	40.883	FALSE	TRUE	FALSE
uspB	uspB	ecl8_00260	0.372024	38.1404	FALSE	TRUE	FALSE
pitA	pitA	ecl8_00261	0.120908	13.3354	FALSE	TRUE	FALSE
ecl8_00262	ecl8_00262	ecl8_00262	0.117493	12.9044	FALSE	TRUE	FALSE
ecl8_00263	ecl8_00263	ecl8_00263	0.15286	17.1329	FALSE	TRUE	FALSE
ecl8_00264	ecl8_00264	ecl8_00264	0.2	22.1947	FALSE	TRUE	FALSE
nikR	nikR	ecl8_00265	0.151741	17.006	FALSE	TRUE	FALSE
nikE	nikE	ecl8_00266	0.132576	14.7676	FALSE	TRUE	FALSE
nikD	nikD	ecl8_00267	0.111111	12.0826	FALSE	TRUE	FALSE
nikC	nikC	ecl8_00268	0.0947242	9.85942	FALSE	TRUE	FALSE
nikB	nikB	ecl8_00269	0.121693	13.4336	FALSE	TRUE	FALSE
nikA	nikA	ecl8_00270	0.131294	14.6131	FALSE	TRUE	FALSE
allS_1	allS_1	ecl8_00271	0.155633	17.4459	FALSE	TRUE	FALSE
padC	padC	ecl8_00272	0.278107	29.7705	FALSE	TRUE	FALSE
arnB	arnB	ecl8_00273	0.147368	16.5063	FALSE	TRUE	FALSE
arnC	arnC	ecl8_00274	0.130081	14.4663	FALSE	TRUE	FALSE
arnA	arnA	ecl8_00275	0.106244	11.4405	FALSE	TRUE	FALSE
arnD	arnD	ecl8_00276	0.112957	12.3225	FALSE	TRUE	FALSE
arnT	arnT	ecl8_00277	0.10628	11.4453	FALSE	TRUE	FALSE
arnE	arnE	ecl8_00278	0.126844	14.0714	FALSE	TRUE	FALSE
arnF	arnF	ecl8_00279	0.115486	12.6482	FALSE	TRUE	FALSE
yhhT_1	yhhT_1	ecl8_00280	0.109524	11.8747	FALSE	TRUE	FALSE
yhhS_1	yhhS_1	ecl8_00281	0.11466	12.5422	FALSE	TRUE	FALSE
ecl8_00282	ecl8_00282	ecl8_00282	0.143369	16.0439	FALSE	TRUE	FALSE
yhhQ	yhhQ	ecl8_00283	0.111111	12.0826	FALSE	TRUE	FALSE
tusA	tusA	ecl8_00284	0.0121951	-10.0754	TRUE	FALSE	FALSE
zntA	zntA	ecl8_00285	0.126187	13.9908	FALSE	TRUE	FALSE
ecl8_00286	ecl8_00286	ecl8_00286	0.169059	18.931	FALSE	TRUE	FALSE
ecl8_00287	ecl8_00287	ecl8_00287	0.131054	14.5841	FALSE	TRUE	FALSE
ecl8_00288	ecl8_00288	ecl8_00288	0.163043	18.2715	FALSE	TRUE	FALSE
rsmD	rsmD	ecl8_00289	0.154104	17.2736	FALSE	TRUE	FALSE
ftsY	ftsY	ecl8_00290	0.0019685	-23.5514	TRUE	FALSE	FALSE
ftsE	ftsE	ecl8_00291	0.103139	11.0233	FALSE	TRUE	FALSE
ftsX	ftsX	ecl8_00292	0.0653409	5.2754	FALSE	TRUE	FALSE
rpoH	rpoH	ecl8_00293	0.00467836	-17.2994	TRUE	FALSE	FALSE
gabR_1	gabR_1	ecl8_00294	0.115486	12.6482	FALSE	TRUE	FALSE
puuE	puuE	ecl8_00295	0.100316	10.6384	FALSE	TRUE	FALSE
tyrP_1	tyrP_1	ecl8_00296	0.122892	13.5831	FALSE	TRUE	FALSE
livJ_1	livJ_1	ecl8_00297	0.111111	12.0826	FALSE	TRUE	FALSE
panM	panM	ecl8_00298	0.125	13.8445	FALSE	TRUE	FALSE
livK	livK	ecl8_00299	0.0900901	9.19541	FALSE	TRUE	FALSE
livH_1	livH_1	ecl8_00300	0.115426	12.6405	FALSE	TRUE	FALSE
ecl8_00301	ecl8_00301	ecl8_00301	0.099374	10.5088	FALSE	TRUE	FALSE
lptB_1	lptB_1	ecl8_00302	0.134115	14.9523	FALSE	TRUE	FALSE
livF_1	livF_1	ecl8_00303	0.0966387	10.1287	FALSE	TRUE	FALSE
ugpB_1	ugpB_1	ecl8_00304	0.110099	11.9502	FALSE	TRUE	FALSE
ugpA_1	ugpA_1	ecl8_00305	0.119369	13.1418	FALSE	TRUE	FALSE
lacG_1	lacG_1	ecl8_00306	0.102837	10.9823	FALSE	TRUE	FALSE
ugpC_1	ugpC_1	ecl8_00307	0.124183	13.7435	FALSE	TRUE	FALSE
ugpQ	ugpQ	ecl8_00308	0.129555	14.4024	FALSE	TRUE	FALSE
yhhA	yhhA	ecl8_00309	0.137072	15.3045	FALSE	TRUE	FALSE
ggt	ggt	ecl8_00310	0.118557	13.0392	FALSE	TRUE	FALSE
aaaT	aaaT	ecl8_00311	0.139059	15.5394	FALSE	TRUE	FALSE
ecl8_00312	ecl8_00312	ecl8_00312	0.12844	14.2667	FALSE	TRUE	FALSE
yhhX	yhhX	ecl8_00313	0.155106	17.3866	FALSE	TRUE	FALSE
yhhW_1	yhhW_1	ecl8_00314	0.155172	17.3941	FALSE	TRUE	FALSE
gntR_1	gntR_1	ecl8_00315	0.11245	12.2568	FALSE	TRUE	FALSE
gntK	gntK	ecl8_00316	0.118644	13.0502	FALSE	TRUE	FALSE
gntU	gntU	ecl8_00317	0.104265	11.1754	FALSE	TRUE	FALSE
asd_1	asd_1	ecl8_00318	0.00271003	-21.2601	TRUE	FALSE	FALSE
glgB	glgB	ecl8_00319	0.109739	11.903	FALSE	TRUE	FALSE
glgX	glgX	ecl8_00320	0.116844	12.8217	FALSE	TRUE	FALSE
glgC_1	glgC_1	ecl8_00321	0.131944	14.6916	FALSE	TRUE	FALSE
glgA	glgA	ecl8_00322	0.132497	14.7581	FALSE	TRUE	FALSE
malP_3	malP_3	ecl8_00323	0.140931	15.7593	FALSE	TRUE	FALSE
glpD	glpD	ecl8_00324	0.0960901	10.0519	FALSE	TRUE	FALSE
glpE_1	glpE_1	ecl8_00325	0.118182	12.9917	FALSE	TRUE	FALSE
glpG	glpG	ecl8_00326	0.135758	15.1484	FALSE	TRUE	FALSE
glpR_1	glpR_1	ecl8_00327	0.129117	14.3492	FALSE	TRUE	FALSE
malT	malT	ecl8_00328	0.140798	15.7437	FALSE	TRUE	FALSE
malP_4	malP_4	ecl8_00329	0.135508	15.1187	FALSE	TRUE	FALSE
malQ	malQ	ecl8_00330	0.115568	12.6588	FALSE	TRUE	FALSE
gntT	gntT	ecl8_00331	0.128322	14.2523	FALSE	TRUE	FALSE
nfuA	nfuA	ecl8_00332	0.046875	1.70216	FALSE	FALSE	TRUE
pyrE_2	pyrE_2	ecl8_00333	0.0933333	9.66196	FALSE	TRUE	FALSE
bioH	bioH	ecl8_00334	0.0956072	9.98399	FALSE	TRUE	FALSE
bhsA_1	bhsA_1	ecl8_00335	0.0925926	9.55617	FALSE	TRUE	FALSE
feoC	feoC	ecl8_00336	0.1375	15.3552	FALSE	TRUE	FALSE
feoB_1	feoB_1	ecl8_00337	0.16947	18.9756	FALSE	TRUE	FALSE
feoA	feoA	ecl8_00338	0.368421	37.8294	FALSE	TRUE	FALSE
yhgF	yhgF	ecl8_00339	0.157872	17.697	FALSE	TRUE	FALSE
greB	greB	ecl8_00340	0.191983	21.3676	FALSE	TRUE	FALSE
ompR_1	ompR_1	ecl8_00341	0.2	22.1947	FALSE	TRUE	FALSE
envZ_1	envZ_1	ecl8_00342	0.156342	17.5256	FALSE	TRUE	FALSE
pckA_1	pckA_1	ecl8_00343	0.135551	15.1238	FALSE	TRUE	FALSE
hslO	hslO	ecl8_00344	0.168373	18.8562	FALSE	TRUE	FALSE
hslR	hslR	ecl8_00345	0.134328	14.9778	FALSE	TRUE	FALSE
yrfG	yrfG	ecl8_00346	0.160819	18.0252	FALSE	TRUE	FALSE
igaA	igaA	ecl8_00347	0.153991	17.2608	FALSE	TRUE	FALSE
nudE	nudE	ecl8_00348	0.176471	19.7313	FALSE	TRUE	FALSE
mrcA	mrcA	ecl8_00349	0.157483	17.6535	FALSE	TRUE	FALSE
ecl8_00350	ecl8_00350	ecl8_00350	0.114856	12.5675	FALSE	TRUE	FALSE
ecl8_00351	ecl8_00351	ecl8_00351	0.108614	11.755	FALSE	TRUE	FALSE
ecl8_00352	ecl8_00352	ecl8_00352	0.100233	10.627	FALSE	TRUE	FALSE
pilQ	pilQ	ecl8_00353	0.13253	14.7621	FALSE	TRUE	FALSE
aroK_1	aroK_1	ecl8_00354	0.105364	11.3229	FALSE	TRUE	FALSE
aroB	aroB	ecl8_00355	0.107763	11.6424	FALSE	TRUE	FALSE
damX	damX	ecl8_00356	0.0916861	9.4261	FALSE	TRUE	FALSE
dam_1	dam_1	ecl8_00357	0.0978261	10.2944	FALSE	TRUE	FALSE
rpe	rpe	ecl8_00358	0.0634218	4.93705	FALSE	TRUE	FALSE
gph	gph	ecl8_00359	0.129921	14.4469	FALSE	TRUE	FALSE
trpS	trpS	ecl8_00360	0.133333	14.8586	FALSE	TRUE	FALSE
cysG_1	cysG_1	ecl8_00361	0.111354	12.1142	FALSE	TRUE	FALSE
nirD	nirD	ecl8_00362	0.0978593	10.299	FALSE	TRUE	FALSE
nasD_1	nasD_1	ecl8_00363	0.121855	13.4539	FALSE	TRUE	FALSE
ecl8_00364	ecl8_00364	ecl8_00364	0.0490196	2.16036	FALSE	FALSE	TRUE
codA_1	codA_1	ecl8_00365	0.146636	16.4221	FALSE	TRUE	FALSE
tsgA	tsgA	ecl8_00366	0.208754	23.0851	FALSE	TRUE	FALSE
ppiA	ppiA	ecl8_00367	0.185965	20.7386	FALSE	TRUE	FALSE
yhfG	yhfG	ecl8_00368	0.10119	10.7582	FALSE	TRUE	FALSE
fic	fic	ecl8_00369	0.14262	15.9567	FALSE	TRUE	FALSE
pabA	pabA	ecl8_00370	0.0957447	10.0033	FALSE	TRUE	FALSE
argD	argD	ecl8_00371	0.126945	14.0839	FALSE	TRUE	FALSE
yccS_1	yccS_1	ecl8_00372	0.154882	17.3614	FALSE	TRUE	FALSE
crp	crp	ecl8_00373	0.107425	11.5976	FALSE	TRUE	FALSE
yhfA	yhfA	ecl8_00374	0.195062	21.6866	FALSE	TRUE	FALSE
cfxP	cfxP	ecl8_00375	0.16092	18.0364	FALSE	TRUE	FALSE
ecl8_00376	ecl8_00376	ecl8_00376	0.182648	20.3889	FALSE	TRUE	FALSE
ecl8_00377	ecl8_00377	ecl8_00377	0.150538	16.8691	FALSE	TRUE	FALSE
yheS_2	yheS_2	ecl8_00378	0.153281	17.1806	FALSE	TRUE	FALSE
ywrO_1	ywrO_1	ecl8_00379	0.171123	19.1551	FALSE	TRUE	FALSE
kefC_1	kefC_1	ecl8_00380	0.175526	19.63	FALSE	TRUE	FALSE
ecl8_00381	ecl8_00381	ecl8_00381	0.21393	23.6057	FALSE	TRUE	FALSE
slyD	slyD	ecl8_00382	0.20068	22.2644	FALSE	TRUE	FALSE
slyX	slyX	ecl8_00383	0.187215	20.8698	FALSE	TRUE	FALSE
fkpA_1	fkpA_1	ecl8_00384	0.194946	21.6746	FALSE	TRUE	FALSE
dauR	dauR	ecl8_00385	0.0691563	5.93044	FALSE	TRUE	FALSE
tusD	tusD	ecl8_00386	0.00516796	-16.5686	TRUE	FALSE	FALSE
tusC	tusC	ecl8_00387	0.00277778	-21.0824	TRUE	FALSE	FALSE
tusB	tusB	ecl8_00388	0.0173611	-7.25092	TRUE	FALSE	FALSE
rpsL	rpsL	ecl8_00389	0	-172.701	TRUE	FALSE	FALSE
rpsG	rpsG	ecl8_00390	0.00212314	-23.0108	TRUE	FALSE	FALSE
fusA_1	fusA_1	ecl8_00391	0	-172.701	TRUE	FALSE	FALSE
tufA_1	tufA_1	ecl8_00392	0.17384	19.4487	FALSE	TRUE	FALSE
bfd	bfd	ecl8_00393	0.302564	32.0099	FALSE	TRUE	FALSE
bfr	bfr	ecl8_00394	0.312369	32.8944	FALSE	TRUE	FALSE
outO_1	outO_1	ecl8_00395	0.206897	22.8972	FALSE	TRUE	FALSE
rpsJ	rpsJ	ecl8_00396	0	-172.701	TRUE	FALSE	FALSE
rplC	rplC	ecl8_00397	0.0015873	-25.0862	TRUE	FALSE	FALSE
rplD	rplD	ecl8_00398	0.00165017	-24.8096	TRUE	FALSE	FALSE
rplW	rplW	ecl8_00399	0	-172.701	TRUE	FALSE	FALSE
rplB	rplB	ecl8_00400	0.00121655	-26.9763	TRUE	FALSE	FALSE
rpsS	rpsS	ecl8_00401	0.00358423	-19.2409	TRUE	FALSE	FALSE
rplV	rplV	ecl8_00402	0	-172.701	TRUE	FALSE	FALSE
rpsC	rpsC	ecl8_00403	0	-172.701	TRUE	FALSE	FALSE
rplP	rplP	ecl8_00404	0	-172.701	TRUE	FALSE	FALSE
rpmC	rpmC	ecl8_00405	0	-172.701	TRUE	FALSE	FALSE
rpsQ	rpsQ	ecl8_00406	0.00392157	-18.5875	TRUE	FALSE	FALSE
rplN	rplN	ecl8_00407	0	-172.701	TRUE	FALSE	FALSE
rplX	rplX	ecl8_00408	0	-172.701	TRUE	FALSE	FALSE
rplE	rplE	ecl8_00409	0	-172.701	TRUE	FALSE	FALSE
rpsN	rpsN	ecl8_00410	0	-172.701	TRUE	FALSE	FALSE
rpsH	rpsH	ecl8_00411	0	-172.701	TRUE	FALSE	FALSE
rplF	rplF	ecl8_00412	0.00374532	-18.9218	TRUE	FALSE	FALSE
rplR	rplR	ecl8_00413	0.00282486	-20.9614	TRUE	FALSE	FALSE
rpsE	rpsE	ecl8_00414	0.00198413	-23.4949	TRUE	FALSE	FALSE
rpmD	rpmD	ecl8_00415	0	-172.701	TRUE	FALSE	FALSE
rplO	rplO	ecl8_00416	0.00229885	-22.4415	TRUE	FALSE	FALSE
secY	secY	ecl8_00417	0.000750751	-30.3919	TRUE	FALSE	FALSE
rpsM	rpsM	ecl8_00418	0.00280112	-21.0221	TRUE	FALSE	FALSE
rpsD	rpsD	ecl8_00419	0	-172.701	TRUE	FALSE	FALSE
rpoA	rpoA	ecl8_00420	0.0010101	-28.294	TRUE	FALSE	FALSE
rplQ	rplQ	ecl8_00421	0.00258398	-21.6025	TRUE	FALSE	FALSE
ecl8_00422	ecl8_00422	ecl8_00422	0.0948509	9.87734	FALSE	TRUE	FALSE
zntR	zntR	ecl8_00423	0.151515	16.9804	FALSE	TRUE	FALSE
ecl8_00424	ecl8_00424	ecl8_00424	0.412607	41.6017	FALSE	TRUE	FALSE
arfA	arfA	ecl8_00425	0.448029	44.5665	FALSE	TRUE	FALSE
mscL	mscL	ecl8_00426	0.364734	37.5104	FALSE	TRUE	FALSE
trkA	trkA	ecl8_00427	0.196078	21.7916	FALSE	TRUE	FALSE
rsmB	rsmB	ecl8_00428	0.148148	16.5959	FALSE	TRUE	FALSE
fmt	fmt	ecl8_00429	0.00632911	-15.0693	TRUE	FALSE	FALSE
def_1	def_1	ecl8_00430	0.160784	18.0214	FALSE	TRUE	FALSE
dprA	dprA	ecl8_00431	0.153778	17.2368	FALSE	TRUE	FALSE
smg	smg	ecl8_00432	0.238397	26.0139	FALSE	TRUE	FALSE
topA_1	topA_1	ecl8_00433	0.158379	17.7536	FALSE	TRUE	FALSE
tsaC	tsaC	ecl8_00434	0.0069808	-14.3382	TRUE	FALSE	FALSE
aroE_1	aroE_1	ecl8_00435	0.163614	18.3345	FALSE	TRUE	FALSE
ecl8_00436	ecl8_00436	ecl8_00436	0.209302	23.1404	FALSE	TRUE	FALSE
yrdA_1	yrdA_1	ecl8_00437	0.205405	22.746	FALSE	TRUE	FALSE
ecl8_00443	ecl8_00443	ecl8_00443	0.207207	22.9287	FALSE	TRUE	FALSE
acrF	acrF	ecl8_00444	0.108968	11.8016	FALSE	TRUE	FALSE
acrE	acrE	ecl8_00445	0.136842	15.2773	FALSE	TRUE	FALSE
acrR_1	acrR_1	ecl8_00446	0.221713	24.3807	FALSE	TRUE	FALSE
fis	fis	ecl8_00447	0.171717	19.2195	FALSE	TRUE	FALSE
dus	dus	ecl8_00448	0.111801	12.1725	FALSE	TRUE	FALSE
prmA	prmA	ecl8_00449	0.103175	11.0281	FALSE	TRUE	FALSE
panF	panF	ecl8_00450	0.0895317	9.11418	FALSE	TRUE	FALSE
yhdT	yhdT	ecl8_00451	0.115226	12.6149	FALSE	TRUE	FALSE
accC_1	accC_1	ecl8_00452	0	-172.701	TRUE	FALSE	FALSE
accB_1	accB_1	ecl8_00453	0.00213675	-22.9651	TRUE	FALSE	FALSE
aroQ	aroQ	ecl8_00454	0.0264901	-3.67315	TRUE	FALSE	FALSE
msrQ	msrQ	ecl8_00455	0.119869	13.2048	FALSE	TRUE	FALSE
msrP	msrP	ecl8_00456	0.110778	12.0392	FALSE	TRUE	FALSE
csrD	csrD	ecl8_00457	0.122102	13.4847	FALSE	TRUE	FALSE
mreB	mreB	ecl8_00458	0.00287356	-20.8382	TRUE	FALSE	FALSE
mreC	mreC	ecl8_00459	0.00302115	-20.4771	TRUE	FALSE	FALSE
mreD	mreD	ecl8_00460	0.0122699	-10.0275	TRUE	FALSE	FALSE
yhdE	yhdE	ecl8_00461	0.146048	16.3542	FALSE	TRUE	FALSE
rng	rng	ecl8_00462	0.151701	17.0014	FALSE	TRUE	FALSE
ecl8_00463	ecl8_00463	ecl8_00463	0.106898	11.5277	FALSE	TRUE	FALSE
tldD	tldD	ecl8_00464	0.129322	14.3741	FALSE	TRUE	FALSE
dmlR_3	dmlR_3	ecl8_00465	0.112903	12.3156	FALSE	TRUE	FALSE
aaeX	aaeX	ecl8_00466	0.0784314	7.43797	FALSE	TRUE	FALSE
aaeA_1	aaeA_1	ecl8_00467	0.148982	16.6914	FALSE	TRUE	FALSE
aaeB_1	aaeB_1	ecl8_00468	0.128049	14.2189	FALSE	TRUE	FALSE
yhcO	yhcO	ecl8_00469	0.101449	10.7936	FALSE	TRUE	FALSE
bhsA_2	bhsA_2	ecl8_00470	0.146067	16.3564	FALSE	TRUE	FALSE
bhsA_3	bhsA_3	ecl8_00471	0.162879	18.2533	FALSE	TRUE	FALSE
argR	argR	ecl8_00472	0.089172	9.06171	FALSE	TRUE	FALSE
mdh_1	mdh_1	ecl8_00473	0.144835	16.214	FALSE	TRUE	FALSE
degS	degS	ecl8_00474	0.131256	14.6085	FALSE	TRUE	FALSE
degQ	degQ	ecl8_00475	0.141082	15.7769	FALSE	TRUE	FALSE
yhcB	yhcB	ecl8_00476	0.145363	16.2751	FALSE	TRUE	FALSE
zapE_1	zapE_1	ecl8_00477	0.163121	18.28	FALSE	TRUE	FALSE
rplM	rplM	ecl8_00478	0	-172.701	TRUE	FALSE	FALSE
rpsI	rpsI	ecl8_00479	0.00508906	-16.6817	TRUE	FALSE	FALSE
sspA	sspA	ecl8_00480	0.156495	17.5427	FALSE	TRUE	FALSE
sspB	sspB	ecl8_00481	0.0909091	9.31406	FALSE	TRUE	FALSE
nanE	nanE	ecl8_00482	0.0978723	10.3008	FALSE	TRUE	FALSE
gltD_1	gltD_1	ecl8_00483	0.112051	12.205	FALSE	TRUE	FALSE
gltB	gltB	ecl8_00484	0.10334	11.0505	FALSE	TRUE	FALSE
rimO_1	rimO_1	ecl8_00485	0.127546	14.1574	FALSE	TRUE	FALSE
exuT_1	exuT_1	ecl8_00486	0.200935	22.2904	FALSE	TRUE	FALSE
rspB	rspB	ecl8_00487	0.172075	19.2582	FALSE	TRUE	FALSE
uxuA_1	uxuA_1	ecl8_00488	0.139906	15.639	FALSE	TRUE	FALSE
arcB	arcB	ecl8_00489	0.092735	9.57655	FALSE	TRUE	FALSE
elbB	elbB	ecl8_00490	0.107034	11.5456	FALSE	TRUE	FALSE
mtgA	mtgA	ecl8_00491	0.0895317	9.11418	FALSE	TRUE	FALSE
ptsO	ptsO	ecl8_00492	0.14652	16.4087	FALSE	TRUE	FALSE
rapZ	rapZ	ecl8_00493	0.11462	12.5371	FALSE	TRUE	FALSE
ptsN	ptsN	ecl8_00494	0.110429	11.9935	FALSE	TRUE	FALSE
hpf_1	hpf_1	ecl8_00495	0.166667	18.6698	FALSE	TRUE	FALSE
rpoN	rpoN	ecl8_00496	0.123431	13.6502	FALSE	TRUE	FALSE
lptB_2	lptB_2	ecl8_00497	0.00137741	-26.0947	TRUE	FALSE	FALSE
lptA	lptA	ecl8_00498	0.00732601	-13.9765	TRUE	FALSE	FALSE
lptC	lptC	ecl8_00499	0.00173611	-24.4479	TRUE	FALSE	FALSE
kdsC	kdsC	ecl8_00500	0.0811287	7.85684	FALSE	TRUE	FALSE
kdsD	kdsD	ecl8_00501	0.130699	14.5412	FALSE	TRUE	FALSE
yrbG	yrbG	ecl8_00502	0.186094	20.7522	FALSE	TRUE	FALSE
mlaF	mlaF	ecl8_00503	0.134071	14.9471	FALSE	TRUE	FALSE
mlaE	mlaE	ecl8_00504	0.15198	17.0331	FALSE	TRUE	FALSE
mlaD	mlaD	ecl8_00505	0.134058	14.9455	FALSE	TRUE	FALSE
mlaC	mlaC	ecl8_00506	0.176101	19.6917	FALSE	TRUE	FALSE
mlaB	mlaB	ecl8_00507	0.118056	12.9757	FALSE	TRUE	FALSE
ibaG	ibaG	ecl8_00508	0.0823529	8.04435	FALSE	TRUE	FALSE
murA	murA	ecl8_00509	0.0015873	-25.0862	TRUE	FALSE	FALSE
ecl8_00510	ecl8_00510	ecl8_00510	0.0989011	10.4435	FALSE	TRUE	FALSE
ispB	ispB	ecl8_00511	0.00720165	-14.105	TRUE	FALSE	FALSE
rplU	rplU	ecl8_00512	0	-172.701	TRUE	FALSE	FALSE
rpmA	rpmA	ecl8_00513	0	-172.701	TRUE	FALSE	FALSE
yhbE	yhbE	ecl8_00514	0.111801	12.1725	FALSE	TRUE	FALSE
obgE	obgE	ecl8_00515	0.0262935	-3.73863	TRUE	FALSE	FALSE
dacB	dacB	ecl8_00516	0.108787	11.7777	FALSE	TRUE	FALSE
greA	greA	ecl8_00517	0.171908	19.2401	FALSE	TRUE	FALSE
yhbY	yhbY	ecl8_00518	0.225225	24.7277	FALSE	TRUE	FALSE
rlmE	rlmE	ecl8_00519	0.18254	20.3774	FALSE	TRUE	FALSE
ftsH_1	ftsH_1	ecl8_00520	0.0144033	-8.75979	TRUE	FALSE	FALSE
folP	folP	ecl8_00521	0.00353357	-19.3441	TRUE	FALSE	FALSE
glmM	glmM	ecl8_00522	0.00373692	-18.9381	TRUE	FALSE	FALSE
secG	secG	ecl8_00523	0.159292	17.8554	FALSE	TRUE	FALSE
ecl8_00525	ecl8_00525	ecl8_00525	0.261194	28.1908	FALSE	TRUE	FALSE
ecl8_00526	ecl8_00526	ecl8_00526	0.237319	25.9095	FALSE	TRUE	FALSE
ecl8_00527	ecl8_00527	ecl8_00527	0.485714	47.6727	FALSE	TRUE	FALSE
argG	argG	ecl8_00528	0.200893	22.2861	FALSE	TRUE	FALSE
rimP	rimP	ecl8_00530	0.0969267	10.169	FALSE	TRUE	FALSE
nusA	nusA	ecl8_00531	0.0168011	-7.51856	TRUE	FALSE	FALSE
infB	infB	ecl8_00532	0.00891862	-12.49	TRUE	FALSE	FALSE
rbfA	rbfA	ecl8_00533	0.0646766	5.15898	FALSE	TRUE	FALSE
truB	truB	ecl8_00534	0.129101	14.3472	FALSE	TRUE	FALSE
rpsO	rpsO	ecl8_00535	0.0185185	-6.72042	TRUE	FALSE	FALSE
pnp	pnp	ecl8_00536	0.103464	11.0673	FALSE	TRUE	FALSE
nlpI	nlpI	ecl8_00537	0.141243	15.7958	FALSE	TRUE	FALSE
deaD	deaD	ecl8_00538	0.0957557	10.0049	FALSE	TRUE	FALSE
mtr	mtr	ecl8_00539	0.109237	11.837	FALSE	TRUE	FALSE
limB_1	limB_1	ecl8_00540	0.115079	12.5961	FALSE	TRUE	FALSE
ecl8_00541	ecl8_00541	ecl8_00541	0.125142	13.8621	FALSE	TRUE	FALSE
yhbU	yhbU	ecl8_00542	0.120482	13.2819	FALSE	TRUE	FALSE
ecl8_00543	ecl8_00543	ecl8_00543	0.125714	13.9326	FALSE	TRUE	FALSE
ecl8_00544	ecl8_00544	ecl8_00544	0.134921	15.0486	FALSE	TRUE	FALSE
ecl8_00545	ecl8_00545	ecl8_00545	0.0965732	10.1196	FALSE	TRUE	FALSE
ecl8_00546	ecl8_00546	ecl8_00546	0.0810811	7.8495	FALSE	TRUE	FALSE
yhbO	yhbO	ecl8_00547	0.0949721	9.89445	FALSE	TRUE	FALSE
ecl8_00548	ecl8_00548	ecl8_00548	0.0925926	9.55617	FALSE	TRUE	FALSE
ecl8_00549	ecl8_00549	ecl8_00549	0.110471	11.9989	FALSE	TRUE	FALSE
osmY_1	osmY_1	ecl8_00550	0.140625	15.7234	FALSE	TRUE	FALSE
diaA	diaA	ecl8_00551	0.101523	10.8036	FALSE	TRUE	FALSE
ecl8_00552	ecl8_00552	ecl8_00552	0.0775194	7.29449	FALSE	TRUE	FALSE
lpoA	lpoA	ecl8_00553	0.108108	11.6881	FALSE	TRUE	FALSE
rsmI	rsmI	ecl8_00554	0.123843	13.7013	FALSE	TRUE	FALSE
garD	garD	ecl8_00555	0.133588	14.8892	FALSE	TRUE	FALSE
ecl8_00556	ecl8_00556	ecl8_00556	0.0666667	5.50558	FALSE	TRUE	FALSE
garP	garP	ecl8_00557	0.17042	19.0789	FALSE	TRUE	FALSE
garL	garL	ecl8_00558	0.110246	11.9695	FALSE	TRUE	FALSE
garR	garR	ecl8_00559	0.10101	10.7336	FALSE	TRUE	FALSE
garK_1	garK_1	ecl8_00560	0.095986	10.0372	FALSE	TRUE	FALSE
ecl8_00561	ecl8_00561	ecl8_00561	0.204301	22.6338	FALSE	TRUE	FALSE
ecl8_00562	ecl8_00562	ecl8_00562	0.211679	23.3798	FALSE	TRUE	FALSE
ecl8_00563	ecl8_00563	ecl8_00563	0.208333	23.0426	FALSE	TRUE	FALSE
yhaK	yhaK	ecl8_00564	0.126781	14.0637	FALSE	TRUE	FALSE
yhaJ_1	yhaJ_1	ecl8_00565	0.119287	13.1314	FALSE	TRUE	FALSE
yhaH	yhaH	ecl8_00566	0.151762	17.0083	FALSE	TRUE	FALSE
yqjG	yqjG	ecl8_00567	0.0942249	9.78872	FALSE	TRUE	FALSE
yqjF	yqjF	ecl8_00568	0.0941476	9.77775	FALSE	TRUE	FALSE
ecl8_00569	ecl8_00569	ecl8_00569	0.0942761	9.79597	FALSE	TRUE	FALSE
yqjE	yqjE	ecl8_00570	0.125313	13.8832	FALSE	TRUE	FALSE
yqjD	yqjD	ecl8_00571	0.111111	12.0826	FALSE	TRUE	FALSE
yqjC	yqjC	ecl8_00572	0.0948509	9.87734	FALSE	TRUE	FALSE
mzrA	mzrA	ecl8_00573	0.136951	15.2902	FALSE	TRUE	FALSE
yqjA	yqjA	ecl8_00574	0.156863	17.584	FALSE	TRUE	FALSE
lldR_2	lldR_2	ecl8_00575	0.1287	14.2984	FALSE	TRUE	FALSE
exuT_2	exuT_2	ecl8_00576	0.125192	13.8682	FALSE	TRUE	FALSE
uxaC	uxaC	ecl8_00577	0.10828	11.7109	FALSE	TRUE	FALSE
uxaA	uxaA	ecl8_00578	0.127688	14.1749	FALSE	TRUE	FALSE
ygjV	ygjV	ecl8_00579	0.127928	14.2042	FALSE	TRUE	FALSE
sstT	sstT	ecl8_00580	0.139423	15.5822	FALSE	TRUE	FALSE
alx	alx	ecl8_00581	0.117284	12.8777	FALSE	TRUE	FALSE
iolU_1	iolU_1	ecl8_00582	0.138384	15.4597	FALSE	TRUE	FALSE
ygjP	ygjP	ecl8_00583	0.113772	12.4279	FALSE	TRUE	FALSE
sutR_1	sutR_1	ecl8_00584	0.102819	10.98	FALSE	TRUE	FALSE
ecl8_00585	ecl8_00585	ecl8_00585	0.0847458	8.40644	FALSE	TRUE	FALSE
rlmG	rlmG	ecl8_00586	0.109637	11.8897	FALSE	TRUE	FALSE
fadH	fadH	ecl8_00587	0.078635	7.46987	FALSE	TRUE	FALSE
lsrK	lsrK	ecl8_00588	0.0881801	8.91644	FALSE	TRUE	FALSE
lsrR_1	lsrR_1	ecl8_00589	0.0679012	5.71744	FALSE	TRUE	FALSE
lsrA	lsrA	ecl8_00590	0.0813172	7.88581	FALSE	TRUE	FALSE
lsrC	lsrC	ecl8_00591	0.0859903	8.59254	FALSE	TRUE	FALSE
lsrD_1	lsrD_1	ecl8_00592	0.103103	11.0184	FALSE	TRUE	FALSE
lsrB_1	lsrB_1	ecl8_00593	0.0908184	9.30094	FALSE	TRUE	FALSE
lsrF	lsrF	ecl8_00594	0.0900901	9.19541	FALSE	TRUE	FALSE
lsrG	lsrG	ecl8_00595	0.0841751	8.3206	FALSE	TRUE	FALSE
ygjK	ygjK	ecl8_00596	0.0956633	9.99188	FALSE	TRUE	FALSE
ecl8_00597	ecl8_00597	ecl8_00597	0.116147	12.7328	FALSE	TRUE	FALSE
ygjI_1	ygjI_1	ecl8_00598	0.097629	10.267	FALSE	TRUE	FALSE
ygjI_2	ygjI_2	ecl8_00599	0.0962343	10.0721	FALSE	TRUE	FALSE
ebgC	ebgC	ecl8_00600	0.0955556	9.97672	FALSE	TRUE	FALSE
ebgA	ebgA	ecl8_00601	0.104429	11.1974	FALSE	TRUE	FALSE
lacR	lacR	ecl8_00602	0.101626	10.8177	FALSE	TRUE	FALSE
ygjH	ygjH	ecl8_00603	0.0930931	9.6277	FALSE	TRUE	FALSE
patA	patA	ecl8_00604	0.104348	11.1864	FALSE	TRUE	FALSE
yqjI	yqjI	ecl8_00605	0.0720721	6.41651	FALSE	TRUE	FALSE
yqjH	yqjH	ecl8_00606	0.0900901	9.19541	FALSE	TRUE	FALSE
dhaK_1	dhaK_1	ecl8_00607	0.0878788	8.87213	FALSE	TRUE	FALSE
dhaM	dhaM	ecl8_00608	0.0893108	9.08198	FALSE	TRUE	FALSE
dhaL	dhaL	ecl8_00609	0.0837283	8.25317	FALSE	TRUE	FALSE
dhaK_2	dhaK_2	ecl8_00610	0.131653	14.6564	FALSE	TRUE	FALSE
dhaD	dhaD	ecl8_00611	0.120219	13.2488	FALSE	TRUE	FALSE
dhaR	dhaR	ecl8_00612	0.102285	10.9074	FALSE	TRUE	FALSE
yvqK_1	yvqK_1	ecl8_00613	0.12806	14.2203	FALSE	TRUE	FALSE
ecl8_00614	ecl8_00614	ecl8_00614	0.110169	11.9595	FALSE	TRUE	FALSE
dhaT	dhaT	ecl8_00615	0.135739	15.1461	FALSE	TRUE	FALSE
ecl8_00616	ecl8_00616	ecl8_00616	0.20979	23.1896	FALSE	TRUE	FALSE
dhaB	dhaB	ecl8_00617	0.11271	12.2905	FALSE	TRUE	FALSE
pduD_1	pduD_1	ecl8_00618	0.102564	10.9453	FALSE	TRUE	FALSE
pduE_1	pduE_1	ecl8_00619	0.124413	13.7719	FALSE	TRUE	FALSE
ddrA_1	ddrA_1	ecl8_00620	0.0910088	9.32846	FALSE	TRUE	FALSE
glpF_2	glpF_2	ecl8_00621	0.0982587	10.3545	FALSE	TRUE	FALSE
hdeB_1	hdeB_1	ecl8_00622	0.238562	26.0299	FALSE	TRUE	FALSE
hdeD_1	hdeD_1	ecl8_00623	0.253472	27.4599	FALSE	TRUE	FALSE
yfdX	yfdX	ecl8_00624	0.155763	17.4605	FALSE	TRUE	FALSE
evgS_1	evgS_1	ecl8_00625	0.125501	13.9063	FALSE	TRUE	FALSE
evgA_1	evgA_1	ecl8_00626	0.289431	30.8136	FALSE	TRUE	FALSE
hdeB_2	hdeB_2	ecl8_00627	0.233677	25.5556	FALSE	TRUE	FALSE
ecl8_00628	ecl8_00628	ecl8_00628	0.207071	22.9149	FALSE	TRUE	FALSE
mug	mug	ecl8_00630	0.136095	15.1885	FALSE	TRUE	FALSE
rpoD	rpoD	ecl8_00631	0.00108578	-27.7824	TRUE	FALSE	FALSE
dnaG	dnaG	ecl8_00632	0.00171821	-24.5217	TRUE	FALSE	FALSE
rpsU	rpsU	ecl8_00633	0.0462963	1.57606	FALSE	FALSE	TRUE
tsaD	tsaD	ecl8_00634	0.00394477	-18.5446	TRUE	FALSE	FALSE
ecl8_00635	ecl8_00635	ecl8_00635	0.113184	12.3519	FALSE	TRUE	FALSE
ureG_1	ureG_1	ecl8_00636	0.106796	11.5141	FALSE	TRUE	FALSE
ureF_1	ureF_1	ecl8_00637	0.108298	11.7132	FALSE	TRUE	FALSE
ureE_1	ureE_1	ecl8_00638	0.1174	12.8925	FALSE	TRUE	FALSE
ureC_1	ureC_1	ecl8_00639	0.0997653	10.5627	FALSE	TRUE	FALSE
ureB_1	ureB_1	ecl8_00640	0.109034	11.8103	FALSE	TRUE	FALSE
ureA	ureA	ecl8_00641	0.115512	12.6515	FALSE	TRUE	FALSE
ureD	ureD	ecl8_00642	0.107879	11.6578	FALSE	TRUE	FALSE
plsY	plsY	ecl8_00643	0.145631	16.3061	FALSE	TRUE	FALSE
folB	folB	ecl8_00644	0.015625	-8.10663	TRUE	FALSE	FALSE
uppP	uppP	ecl8_00645	0.160584	17.9991	FALSE	TRUE	FALSE
cca	cca	ecl8_00646	0.0120773	-10.1514	TRUE	FALSE	FALSE
ecl8_00647	ecl8_00647	ecl8_00647	0.127214	14.1168	FALSE	TRUE	FALSE
ygiF	ygiF	ecl8_00648	0.102386	10.9212	FALSE	TRUE	FALSE
glnE	glnE	ecl8_00649	0.109232	11.8363	FALSE	TRUE	FALSE
hldE	hldE	ecl8_00650	0.0111576	-10.7688	TRUE	FALSE	FALSE
glgS	glgS	ecl8_00651	0.156566	17.5506	FALSE	TRUE	FALSE
yqiC	yqiC	ecl8_00652	0.0842491	8.33175	FALSE	TRUE	FALSE
ribB	ribB	ecl8_00653	0.0030581	-20.3894	TRUE	FALSE	FALSE
zupT	zupT	ecl8_00654	0.115435	12.6416	FALSE	TRUE	FALSE
ygiD	ygiD	ecl8_00655	0.109848	11.9174	FALSE	TRUE	FALSE
ygiC	ygiC	ecl8_00656	0.131783	14.6721	FALSE	TRUE	FALSE
ecl8_00657	ecl8_00657	ecl8_00657	0.113095	12.3404	FALSE	TRUE	FALSE
tolC	tolC	ecl8_00658	0.167006	18.7069	FALSE	TRUE	FALSE
nudF	nudF	ecl8_00659	0.154818	17.3542	FALSE	TRUE	FALSE
ecl8_00660	ecl8_00660	ecl8_00660	0.20331	22.5329	FALSE	TRUE	FALSE
cpdA_1	cpdA_1	ecl8_00661	0.161836	18.138	FALSE	TRUE	FALSE
ecl8_00662	ecl8_00662	ecl8_00662	0.0798611	7.66099	FALSE	TRUE	FALSE
parE	parE	ecl8_00663	0.00316456	-20.1423	TRUE	FALSE	FALSE
ygiN	ygiN	ecl8_00664	0.161905	18.1456	FALSE	TRUE	FALSE
mdaB	mdaB	ecl8_00665	0.12543	13.8975	FALSE	TRUE	FALSE
qseC	qseC	ecl8_00666	0.102679	10.9609	FALSE	TRUE	FALSE
qseB	qseB	ecl8_00667	0.119697	13.1831	FALSE	TRUE	FALSE
ygiW_1	ygiW_1	ecl8_00668	0.146465	16.4023	FALSE	TRUE	FALSE
adaA_1	adaA_1	ecl8_00669	0.108046	11.6799	FALSE	TRUE	FALSE
parC	parC	ecl8_00670	0.00309872	-20.2942	TRUE	FALSE	FALSE
plsC	plsC	ecl8_00671	0	-172.701	TRUE	FALSE	FALSE
ftsP	ftsP	ecl8_00672	0.108988	11.8042	FALSE	TRUE	FALSE
rimO_2	rimO_2	ecl8_00673	0.114927	12.5765	FALSE	TRUE	FALSE
ecl8_00674	ecl8_00674	ecl8_00674	0.104575	11.217	FALSE	TRUE	FALSE
ecl8_00675	ecl8_00675	ecl8_00675	0.144144	16.1339	FALSE	TRUE	FALSE
dkgA	dkgA	ecl8_00676	0.0990338	10.4618	FALSE	TRUE	FALSE
yqhD	yqhD	ecl8_00677	0.106529	11.4785	FALSE	TRUE	FALSE
rclR_2	rclR_2	ecl8_00678	0.11	11.9372	FALSE	TRUE	FALSE
yghB	yghB	ecl8_00679	0.125758	13.9379	FALSE	TRUE	FALSE
metC_1	metC_1	ecl8_00680	0.124579	13.7925	FALSE	TRUE	FALSE
exbB	exbB	ecl8_00681	0.120219	13.2488	FALSE	TRUE	FALSE
exbD	exbD	ecl8_00682	0.105634	11.359	FALSE	TRUE	FALSE
ecl8_00683	ecl8_00683	ecl8_00683	0.175758	19.6549	FALSE	TRUE	FALSE
ecl8_00684	ecl8_00684	ecl8_00684	0.129477	14.3929	FALSE	TRUE	FALSE
clcD_1	clcD_1	ecl8_00685	0.120735	13.3136	FALSE	TRUE	FALSE
ecl8_00686	ecl8_00686	ecl8_00686	0.0902778	9.22265	FALSE	TRUE	FALSE
yghU	yghU	ecl8_00687	0.0957324	10.0016	FALSE	TRUE	FALSE
ecl8_00688	ecl8_00688	ecl8_00688	0.135472	15.1144	FALSE	TRUE	FALSE
gss	gss	ecl8_00689	0.110397	11.9892	FALSE	TRUE	FALSE
lysN_1	lysN_1	ecl8_00690	0.123519	13.6612	FALSE	TRUE	FALSE
ecl8_00691	ecl8_00691	ecl8_00691	0.155556	17.4372	FALSE	TRUE	FALSE
ecl8_00692	ecl8_00692	ecl8_00692	0.0793651	7.58387	FALSE	TRUE	FALSE
ecl8_00693	ecl8_00693	ecl8_00693	0.147826	16.5589	FALSE	TRUE	FALSE
fabG_2	fabG_2	ecl8_00694	0.124378	13.7676	FALSE	TRUE	FALSE
dmlR_4	dmlR_4	ecl8_00695	0.0635965	4.9681	FALSE	TRUE	FALSE
metC_2	metC_2	ecl8_00696	0.0809399	7.82778	FALSE	TRUE	FALSE
cbs	cbs	ecl8_00697	0.0893246	9.08399	FALSE	TRUE	FALSE
ecl8_00698	ecl8_00698	ecl8_00698	0.296512	31.4603	FALSE	TRUE	FALSE
elfD_1	elfD_1	ecl8_00699	0.20558	22.7637	FALSE	TRUE	FALSE
ecl8_00700	ecl8_00700	ecl8_00700	0.183971	20.5287	FALSE	TRUE	FALSE
ecl8_00701	ecl8_00701	ecl8_00701	0.151986	17.0339	FALSE	TRUE	FALSE
elfD_2	elfD_2	ecl8_00702	0.222222	24.4312	FALSE	TRUE	FALSE
fimC_1	fimC_1	ecl8_00703	0.0457516	1.45638	FALSE	FALSE	TRUE
yraJ	yraJ	ecl8_00704	0.150674	16.8847	FALSE	TRUE	FALSE
ecl8_00705	ecl8_00705	ecl8_00705	0.160423	17.9812	FALSE	TRUE	FALSE
intA_1	intA_1	ecl8_00706	0.104167	11.1621	FALSE	TRUE	FALSE
ydfK_1	ydfK_1	ecl8_00708	0.0980392	10.324	FALSE	TRUE	FALSE
speC	speC	ecl8_00709	0.105657	11.3621	FALSE	TRUE	FALSE
nupG_1	nupG_1	ecl8_00710	0.119403	13.1461	FALSE	TRUE	FALSE
nupG_2	nupG_2	ecl8_00711	0.12844	14.2667	FALSE	TRUE	FALSE
mltC	mltC	ecl8_00712	0.120626	13.3	FALSE	TRUE	FALSE
yggX	yggX	ecl8_00713	0.130435	14.5092	FALSE	TRUE	FALSE
mutY	mutY	ecl8_00714	0.11237	12.2465	FALSE	TRUE	FALSE
trmB	trmB	ecl8_00715	0.108333	11.7179	FALSE	TRUE	FALSE
ecl8_00716	ecl8_00716	ecl8_00716	0.131498	14.6378	FALSE	TRUE	FALSE
ecl8_00717	ecl8_00717	ecl8_00717	0.105997	11.4076	FALSE	TRUE	FALSE
xylH_2	xylH_2	ecl8_00718	0.109776	11.9078	FALSE	TRUE	FALSE
frcA_1	frcA_1	ecl8_00719	0.0839506	8.28675	FALSE	TRUE	FALSE
xylF_2	xylF_2	ecl8_00720	0.0916905	9.42674	FALSE	TRUE	FALSE
hemN_1	hemN_1	ecl8_00721	0.095614	9.98495	FALSE	TRUE	FALSE
rdgB	rdgB	ecl8_00722	0.0909091	9.31406	FALSE	TRUE	FALSE
ecl8_00723	ecl8_00723	ecl8_00723	0.127148	14.1087	FALSE	TRUE	FALSE
ecl8_00724	ecl8_00724	ecl8_00724	0.111111	12.0826	FALSE	TRUE	FALSE
yggS	yggS	ecl8_00725	0.105413	11.3295	FALSE	TRUE	FALSE
yggR	yggR	ecl8_00726	0.160041	17.9388	FALSE	TRUE	FALSE
csgD_1	csgD_1	ecl8_00727	0.198777	22.0693	FALSE	TRUE	FALSE
yqgF	yqgF	ecl8_00728	0.0167866	-7.52559	TRUE	FALSE	FALSE
ecl8_00729	ecl8_00729	ecl8_00729	0.0797872	7.64952	FALSE	TRUE	FALSE
gshB	gshB	ecl8_00730	0.0914826	9.39681	FALSE	TRUE	FALSE
rsmE	rsmE	ecl8_00731	0.117486	12.9034	FALSE	TRUE	FALSE
endA	endA	ecl8_00732	0.101695	10.8271	FALSE	TRUE	FALSE
sprT	sprT	ecl8_00733	0.0849673	8.43968	FALSE	TRUE	FALSE
galP	galP	ecl8_00734	0.125448	13.8998	FALSE	TRUE	FALSE
metK	metK	ecl8_00735	0.00519481	-16.5304	TRUE	FALSE	FALSE
speA	speA	ecl8_00736	0.138594	15.4845	FALSE	TRUE	FALSE
speB	speB	ecl8_00737	0.121607	13.4229	FALSE	TRUE	FALSE
loiP	loiP	ecl8_00738	0.126482	14.027	FALSE	TRUE	FALSE
tktA_1	tktA_1	ecl8_00739	0.0502008	2.40691	FALSE	FALSE	TRUE
epd	epd	ecl8_00740	0.0991254	10.4745	FALSE	TRUE	FALSE
pgk	pgk	ecl8_00741	0.00257732	-21.621	TRUE	FALSE	FALSE
fbaA_1	fbaA_1	ecl8_00742	0.00277778	-21.0824	TRUE	FALSE	FALSE
mscS	mscS	ecl8_00743	0.128205	14.238	FALSE	TRUE	FALSE
argO	argO	ecl8_00744	0.108491	11.7386	FALSE	TRUE	FALSE
ecl8_00745	ecl8_00745	ecl8_00745	0.09375	9.72128	FALSE	TRUE	FALSE
argP	argP	ecl8_00746	0.102908	10.992	FALSE	TRUE	FALSE
rpiA	rpiA	ecl8_00747	0.0212121	-5.58674	TRUE	FALSE	FALSE
serA	serA	ecl8_00748	0.100568	10.673	FALSE	TRUE	FALSE
ygfA	ygfA	ecl8_00749	0.108878	11.7897	FALSE	TRUE	FALSE
zapA	zapA	ecl8_00750	0.166667	18.6698	FALSE	TRUE	FALSE
ecl8_00751	ecl8_00751	ecl8_00751	0.140171	15.6701	FALSE	TRUE	FALSE
pepP	pepP	ecl8_00752	0.0827639	8.10695	FALSE	TRUE	FALSE
ubiH	ubiH	ecl8_00753	0.0186599	-6.65757	TRUE	FALSE	FALSE
ubiI	ubiI	ecl8_00754	0.078138	7.39192	FALSE	TRUE	FALSE
gcvT	gcvT	ecl8_00755	0.110502	12.003	FALSE	TRUE	FALSE
gcvH	gcvH	ecl8_00756	0.158974	17.82	FALSE	TRUE	FALSE
gcvP	gcvP	ecl8_00757	0.102644	10.9562	FALSE	TRUE	FALSE
ygfF	ygfF	ecl8_00758	0.0967742	10.1477	FALSE	TRUE	FALSE
msrAB	msrAB	ecl8_00759	0.0615079	4.59322	FALSE	TRUE	FALSE
bdbD	bdbD	ecl8_00760	0.0604575	4.40165	FALSE	TRUE	FALSE
dsbD_1	dsbD_1	ecl8_00761	0.0915423	9.4054	FALSE	TRUE	FALSE
ecl8_00762	ecl8_00762	ecl8_00762	0.075	6.89304	FALSE	TRUE	FALSE
bglA_1	bglA_1	ecl8_00763	0.168061	18.8222	FALSE	TRUE	FALSE
glvR_2	glvR_2	ecl8_00764	0.282579	30.1838	FALSE	TRUE	FALSE
ecl8_00765	ecl8_00765	ecl8_00765	0.121795	13.4464	FALSE	TRUE	FALSE
ecl8_00766	ecl8_00766	ecl8_00766	0.150628	16.8793	FALSE	TRUE	FALSE
ygfZ	ygfZ	ecl8_00767	0.00813008	-13.1922	TRUE	FALSE	FALSE
sdhE	sdhE	ecl8_00768	0.149813	16.7864	FALSE	TRUE	FALSE
ygfX	ygfX	ecl8_00769	0.107056	11.5486	FALSE	TRUE	FALSE
fldB	fldB	ecl8_00770	0.111111	12.0826	FALSE	TRUE	FALSE
xerD_1	xerD_1	ecl8_00771	0.0301003	-2.53403	FALSE	FALSE	TRUE
dsbC	dsbC	ecl8_00772	0.123249	13.6276	FALSE	TRUE	FALSE
recJ	recJ	ecl8_00773	0.0870819	8.75455	FALSE	TRUE	FALSE
prfB	prfB	ecl8_00774	0.00103842	-28.0982	TRUE	FALSE	FALSE
lysS	lysS	ecl8_00775	0	-172.701	TRUE	FALSE	FALSE
idi	idi	ecl8_00776	0.0882883	8.93232	FALSE	TRUE	FALSE
nlpD_1	nlpD_1	ecl8_00777	0.105042	11.2797	FALSE	TRUE	FALSE
ribZ_1	ribZ_1	ecl8_00779	0.113031	12.3321	FALSE	TRUE	FALSE
nodD2_1	nodD2_1	ecl8_00780	0.137634	15.3711	FALSE	TRUE	FALSE
ecl8_00781	ecl8_00781	ecl8_00781	0.204703	22.6746	FALSE	TRUE	FALSE
evgA_2	evgA_2	ecl8_00782	0.0681481	5.75953	FALSE	TRUE	FALSE
ecl8_00783	ecl8_00783	ecl8_00783	0.155172	17.3941	FALSE	TRUE	FALSE
evgS_2	evgS_2	ecl8_00784	0.128121	14.2277	FALSE	TRUE	FALSE
evgA_3	evgA_3	ecl8_00785	0.0352564	-1.07797	FALSE	FALSE	TRUE
lpfC'	lpfC'	ecl8_00786	0.246085	26.7547	FALSE	TRUE	FALSE
esiB	esiB	ecl8_00787	0.241119	26.277	FALSE	TRUE	FALSE
hdeA	hdeA	ecl8_00788	0.115265	12.6199	FALSE	TRUE	FALSE
ecl8_00789	ecl8_00789	ecl8_00789	0.20155	22.3534	FALSE	TRUE	FALSE
yejF_1	yejF_1	ecl8_00790	0.181818	20.301	FALSE	TRUE	FALSE
oppD_1	oppD_1	ecl8_00791	0.173482	19.4101	FALSE	TRUE	FALSE
ddpC_1	ddpC_1	ecl8_00792	0.180147	20.1237	FALSE	TRUE	FALSE
gsiC_1	gsiC_1	ecl8_00793	0.143275	16.0329	FALSE	TRUE	FALSE
appA_1	appA_1	ecl8_00794	0.15283	17.1296	FALSE	TRUE	FALSE
ecl8_00795	ecl8_00795	ecl8_00795	0.247247	26.866	FALSE	TRUE	FALSE
ureH	ureH	ecl8_00796	0.230284	25.2244	FALSE	TRUE	FALSE
ureG_2	ureG_2	ecl8_00797	0.217949	24.007	FALSE	TRUE	FALSE
ureF_2	ureF_2	ecl8_00798	0.225035	24.709	FALSE	TRUE	FALSE
ureE_2	ureE_2	ecl8_00799	0.175274	19.6029	FALSE	TRUE	FALSE
ureC_2	ureC_2	ecl8_00800	0.171611	19.208	FALSE	TRUE	FALSE
ureB_2	ureB_2	ecl8_00801	0.14059	15.7193	FALSE	TRUE	FALSE
ureA2	ureA2	ecl8_00802	0.168317	18.8501	FALSE	TRUE	FALSE
amt	amt	ecl8_00803	0.18785	20.9364	FALSE	TRUE	FALSE
hdeB_3	hdeB_3	ecl8_00804	0.121795	13.4464	FALSE	TRUE	FALSE
hdeD_2	hdeD_2	ecl8_00805	0.0592217	4.17355	FALSE	TRUE	FALSE
emrY	emrY	ecl8_00806	0.195964	21.7797	FALSE	TRUE	FALSE
emrK_1	emrK_1	ecl8_00807	0.169666	18.997	FALSE	TRUE	FALSE
evgA_4	evgA_4	ecl8_00808	0.157978	17.7088	FALSE	TRUE	FALSE
evgS_3	evgS_3	ecl8_00809	0.182967	20.4227	FALSE	TRUE	FALSE
crcB_1	crcB_1	ecl8_00810	0.231884	25.3808	FALSE	TRUE	FALSE
crcB_2	crcB_2	ecl8_00811	0.252604	27.3774	FALSE	TRUE	FALSE
ecl8_00812	ecl8_00812	ecl8_00812	0.289474	30.8175	FALSE	TRUE	FALSE
ecl8_00813	ecl8_00813	ecl8_00813	0.308943	32.5861	FALSE	TRUE	FALSE
pdeG_1	pdeG_1	ecl8_00814	0.169897	19.0221	FALSE	TRUE	FALSE
ecl8_00815	ecl8_00815	ecl8_00815	0.248804	27.0149	FALSE	TRUE	FALSE
ecl8_00816	ecl8_00816	ecl8_00816	0.169154	18.9413	FALSE	TRUE	FALSE
iolS_1	iolS_1	ecl8_00817	0.138235	15.4422	FALSE	TRUE	FALSE
kefF_1	kefF_1	ecl8_00818	0.15233	17.0728	FALSE	TRUE	FALSE
ecl8_00819	ecl8_00819	ecl8_00819	0.291262	30.9813	FALSE	TRUE	FALSE
pgrR_1	pgrR_1	ecl8_00820	0.248889	27.0231	FALSE	TRUE	FALSE
ecl8_00821	ecl8_00821	ecl8_00821	0.148551	16.642	FALSE	TRUE	FALSE
ecl8_00822	ecl8_00822	ecl8_00822	0.148342	16.6181	FALSE	TRUE	FALSE
arsR2	arsR2	ecl8_00823	0.133333	14.8586	FALSE	TRUE	FALSE
arsB	arsB	ecl8_00824	0.116009	12.7152	FALSE	TRUE	FALSE
arsC	arsC	ecl8_00825	0.106383	11.459	FALSE	TRUE	FALSE
dtpT	dtpT	ecl8_00826	0.126126	13.9833	FALSE	TRUE	FALSE
ecl8_00827	ecl8_00827	ecl8_00827	0.15	16.8078	FALSE	TRUE	FALSE
cusC_1	cusC_1	ecl8_00828	0.0959282	10.0291	FALSE	TRUE	FALSE
mdtO	mdtO	ecl8_00829	0.0975232	10.2522	FALSE	TRUE	FALSE
mdtN_1	mdtN_1	ecl8_00830	0.103314	11.0469	FALSE	TRUE	FALSE
ecl8_00831	ecl8_00831	ecl8_00831	0.0805861	7.77321	FALSE	TRUE	FALSE
ecl8_00832	ecl8_00832	ecl8_00832	0.142857	15.9843	FALSE	TRUE	FALSE
yjdJ	yjdJ	ecl8_00833	0.150183	16.8287	FALSE	TRUE	FALSE
ecl8_00834	ecl8_00834	ecl8_00834	0.127389	14.1382	FALSE	TRUE	FALSE
fimH	fimH	ecl8_00835	0.114411	12.5103	FALSE	TRUE	FALSE
fimG	fimG	ecl8_00836	0.11976	13.1911	FALSE	TRUE	FALSE
fimF_1	fimF_1	ecl8_00837	0.0909091	9.31406	FALSE	TRUE	FALSE
fimD_1	fimD_1	ecl8_00838	0.113662	12.4137	FALSE	TRUE	FALSE
fimC_2	fimC_2	ecl8_00839	0.126241	13.9974	FALSE	TRUE	FALSE
lpfA	lpfA	ecl8_00840	0.115456	12.6444	FALSE	TRUE	FALSE
fim_1	fim_1	ecl8_00841	0.0947177	9.85849	FALSE	TRUE	FALSE
xerD_2	xerD_2	ecl8_00842	0.20197	22.3963	FALSE	TRUE	FALSE
xerC_1	xerC_1	ecl8_00843	0.318482	33.4423	FALSE	TRUE	FALSE
ecl8_00844	ecl8_00844	ecl8_00844	0.131661	14.6575	FALSE	TRUE	FALSE
marR_1	marR_1	ecl8_00845	0.0828402	8.11856	FALSE	TRUE	FALSE
ecl8_00846	ecl8_00846	ecl8_00846	0.101449	10.7936	FALSE	TRUE	FALSE
ecl8_00847	ecl8_00847	ecl8_00847	0.17619	19.7013	FALSE	TRUE	FALSE
ecl8_00848	ecl8_00848	ecl8_00848	0.328407	34.3264	FALSE	TRUE	FALSE
yadV_1	yadV_1	ecl8_00849	0.217949	24.007	FALSE	TRUE	FALSE
htrE_1	htrE_1	ecl8_00850	0.147969	16.5753	FALSE	TRUE	FALSE
mrkD_1	mrkD_1	ecl8_00851	0.134146	14.9561	FALSE	TRUE	FALSE
ecl8_00852	ecl8_00852	ecl8_00852	0.191824	21.351	FALSE	TRUE	FALSE
pdeH_1	pdeH_1	ecl8_00853	0.218968	24.1084	FALSE	TRUE	FALSE
uhpA_2	uhpA_2	ecl8_00854	0.275742	29.5513	FALSE	TRUE	FALSE
ycgR	ycgR	ecl8_00855	0.180142	20.1231	FALSE	TRUE	FALSE
pdxI	pdxI	ecl8_00856	0.141069	15.7755	FALSE	TRUE	FALSE
yqeG	yqeG	ecl8_00857	0.134146	14.9561	FALSE	TRUE	FALSE
ecl8_00858	ecl8_00858	ecl8_00858	0.160173	17.9535	FALSE	TRUE	FALSE
gltC_1	gltC_1	ecl8_00859	0.0988506	10.4365	FALSE	TRUE	FALSE
thlA_1	thlA_1	ecl8_00860	0.118745	13.063	FALSE	TRUE	FALSE
kdgM	kdgM	ecl8_00861	0.195402	21.7218	FALSE	TRUE	FALSE
ogl	ogl	ecl8_00862	0.113946	12.4503	FALSE	TRUE	FALSE
kduD_1	kduD_1	ecl8_00863	0.0931759	9.63951	FALSE	TRUE	FALSE
araE	araE	ecl8_00864	0.125879	13.9529	FALSE	TRUE	FALSE
cytR_1	cytR_1	ecl8_00865	0.106426	11.4647	FALSE	TRUE	FALSE
cscB	cscB	ecl8_00866	0.125604	13.919	FALSE	TRUE	FALSE
sacA	sacA	ecl8_00867	0.156576	17.5518	FALSE	TRUE	FALSE
ecl8_00868	ecl8_00868	ecl8_00868	0.213542	23.5668	FALSE	TRUE	FALSE
yesO	yesO	ecl8_00869	0.131313	14.6154	FALSE	TRUE	FALSE
sugC	sugC	ecl8_00870	0.089539	9.11525	FALSE	TRUE	FALSE
araQ	araQ	ecl8_00871	0.142857	15.9843	FALSE	TRUE	FALSE
lacF	lacF	ecl8_00872	0.213244	23.5369	FALSE	TRUE	FALSE
ecl8_00873	ecl8_00873	ecl8_00873	0.266055	28.6477	FALSE	TRUE	FALSE
ygeA	ygeA	ecl8_00874	0.130252	14.487	FALSE	TRUE	FALSE
occR_1	occR_1	ecl8_00875	0.119741	13.1887	FALSE	TRUE	FALSE
lysA	lysA	ecl8_00876	0.117973	12.9652	FALSE	TRUE	FALSE
ascG_2	ascG_2	ecl8_00877	0.11276	12.297	FALSE	TRUE	FALSE
licC_2	licC_2	ecl8_00878	0.0964126	10.0971	FALSE	TRUE	FALSE
gmuD_1	gmuD_1	ecl8_00879	0.10014	10.6143	FALSE	TRUE	FALSE
lldR_3	lldR_3	ecl8_00880	0.0930233	9.61773	FALSE	TRUE	FALSE
ecl8_00881	ecl8_00881	ecl8_00881	0.108333	11.7179	FALSE	TRUE	FALSE
galR_1	galR_1	ecl8_00882	0.104228	11.1703	FALSE	TRUE	FALSE
aas	aas	ecl8_00883	0.103704	11.0996	FALSE	TRUE	FALSE
lplT	lplT	ecl8_00884	0.10469	11.2325	FALSE	TRUE	FALSE
tas_1	tas_1	ecl8_00885	0.12488	13.8297	FALSE	TRUE	FALSE
ygdR_1	ygdR_1	ecl8_00886	0.155251	17.4029	FALSE	TRUE	FALSE
ecl8_00887	ecl8_00887	ecl8_00887	0.152661	17.1104	FALSE	TRUE	FALSE
mutH	mutH	ecl8_00888	0.122126	13.4878	FALSE	TRUE	FALSE
rppH	rppH	ecl8_00889	0.118644	13.0502	FALSE	TRUE	FALSE
ptsP	ptsP	ecl8_00890	0.116155	12.7338	FALSE	TRUE	FALSE
lgt	lgt	ecl8_00891	0.00228311	-22.4907	TRUE	FALSE	FALSE
thyA	thyA	ecl8_00892	0.00251572	-21.7948	TRUE	FALSE	FALSE
ecl8_00893	ecl8_00893	ecl8_00893	0.0887681	9.00266	FALSE	TRUE	FALSE
ecl8_00894	ecl8_00894	ecl8_00894	0.0824373	8.05721	FALSE	TRUE	FALSE
ecl8_00895	ecl8_00895	ecl8_00895	0.0808824	7.81891	FALSE	TRUE	FALSE
ecl8_00896	ecl8_00896	ecl8_00896	0.104938	11.2658	FALSE	TRUE	FALSE
recC	recC	ecl8_00897	0.0461812	1.55084	FALSE	FALSE	TRUE
ptrA_1	ptrA_1	ecl8_00898	0.100485	10.6616	FALSE	TRUE	FALSE
recB	recB	ecl8_00899	0.0469324	1.71461	FALSE	FALSE	TRUE
recD_1	recD_1	ecl8_00900	0.0760761	7.06545	FALSE	TRUE	FALSE
recD_2	recD_2	ecl8_00901	0.0884848	8.96116	FALSE	TRUE	FALSE
ecl8_00902	ecl8_00902	ecl8_00902	0.0903427	9.23206	FALSE	TRUE	FALSE
argA	argA	ecl8_00903	0.111111	12.0826	FALSE	TRUE	FALSE
amiC_1	amiC_1	ecl8_00904	0.110048	11.9435	FALSE	TRUE	FALSE
cobD_1	cobD_1	ecl8_00905	0.0965645	10.1184	FALSE	TRUE	FALSE
pduX	pduX	ecl8_00906	0.0876586	8.8397	FALSE	TRUE	FALSE
pduW	pduW	ecl8_00907	0.0971193	10.1959	FALSE	TRUE	FALSE
pduV_1	pduV_1	ecl8_00908	0.0884354	8.95391	FALSE	TRUE	FALSE
pduU	pduU	ecl8_00909	0.0769231	7.20016	FALSE	TRUE	FALSE
ccmK	ccmK	ecl8_00910	0.106306	11.4488	FALSE	TRUE	FALSE
rnfC	rnfC	ecl8_00911	0.097561	10.2575	FALSE	TRUE	FALSE
adhE_1	adhE_1	ecl8_00912	0.083558	8.22742	FALSE	TRUE	FALSE
adhE_2	adhE_2	ecl8_00913	0.074874	6.87276	FALSE	TRUE	FALSE
yvqK_2	yvqK_2	ecl8_00914	0.0855457	8.52623	FALSE	TRUE	FALSE
ccmL	ccmL	ecl8_00915	0.0507246	2.51499	FALSE	FALSE	TRUE
ecl8_00916	ecl8_00916	ecl8_00916	0.0853659	8.49935	FALSE	TRUE	FALSE
pduL	pduL	ecl8_00917	0.0853081	8.4907	FALSE	TRUE	FALSE
ccmK2	ccmK2	ecl8_00918	0.0917226	9.43135	FALSE	TRUE	FALSE
pduA_1	pduA_1	ecl8_00919	0.0905797	9.26641	FALSE	TRUE	FALSE
ecl8_00920	ecl8_00920	ecl8_00920	0.0883191	8.93684	FALSE	TRUE	FALSE
ddrA_2	ddrA_2	ecl8_00921	0.102019	10.8712	FALSE	TRUE	FALSE
pduE_2	pduE_2	ecl8_00922	0.102857	10.9851	FALSE	TRUE	FALSE
pduD_2	pduD_2	ecl8_00923	0.0652174	5.25381	FALSE	TRUE	FALSE
pduC	pduC	ecl8_00924	0.105706	11.3686	FALSE	TRUE	FALSE
pduB	pduB	ecl8_00925	0.124231	13.7494	FALSE	TRUE	FALSE
pduA_2	pduA_2	ecl8_00926	0.287719	30.6567	FALSE	TRUE	FALSE
pduF	pduF	ecl8_00927	0.193827	21.5589	FALSE	TRUE	FALSE
araC_1	araC_1	ecl8_00928	0.232456	25.4366	FALSE	TRUE	FALSE
cbiA	cbiA	ecl8_00929	0.111111	12.0826	FALSE	TRUE	FALSE
cobD_2	cobD_2	ecl8_00930	0.0989583	10.4514	FALSE	TRUE	FALSE
cbiC	cbiC	ecl8_00931	0.0786164	7.46695	FALSE	TRUE	FALSE
cbiD	cbiD	ecl8_00932	0.0789474	7.51872	FALSE	TRUE	FALSE
cbiE	cbiE	ecl8_00933	0.0693069	5.95585	FALSE	TRUE	FALSE
cbiT	cbiT	ecl8_00934	0.0719298	6.39307	FALSE	TRUE	FALSE
cbiF	cbiF	ecl8_00935	0.0801034	7.69855	FALSE	TRUE	FALSE
cbiG	cbiG	ecl8_00936	0.063447	4.94152	FALSE	TRUE	FALSE
cbiH	cbiH	ecl8_00937	0.0730028	6.56919	FALSE	TRUE	FALSE
cbiJ	cbiJ	ecl8_00938	0.0839695	8.2896	FALSE	TRUE	FALSE
cbiK	cbiK	ecl8_00939	0.0767296	7.16946	FALSE	TRUE	FALSE
cbiL	cbiL	ecl8_00940	0.0812325	7.87279	FALSE	TRUE	FALSE
cbiM	cbiM	ecl8_00941	0.0826558	8.09051	FALSE	TRUE	FALSE
cbiN	cbiN	ecl8_00942	0.0602837	4.36975	FALSE	TRUE	FALSE
cbiQ	cbiQ	ecl8_00943	0.106195	11.4339	FALSE	TRUE	FALSE
cbiO_1	cbiO_1	ecl8_00944	0.0909091	9.31406	FALSE	TRUE	FALSE
cobQ	cobQ	ecl8_00945	0.0872703	8.78241	FALSE	TRUE	FALSE
cobU	cobU	ecl8_00946	0.0549451	3.35979	FALSE	FALSE	TRUE
cobT_1	cobT_1	ecl8_00947	0.0738636	6.70941	FALSE	TRUE	FALSE
mltA	mltA	ecl8_00951	0.0928962	9.59958	FALSE	TRUE	FALSE
tcdA	tcdA	ecl8_00952	0.0912409	9.36196	FALSE	TRUE	FALSE
csdE	csdE	ecl8_00953	0.113426	12.3832	FALSE	TRUE	FALSE
csdA	csdA	ecl8_00954	0.110282	11.9742	FALSE	TRUE	FALSE
ygdR_2	ygdR_2	ecl8_00955	0.190476	21.2107	FALSE	TRUE	FALSE
gcvA_1	gcvA_1	ecl8_00956	0.104242	11.1723	FALSE	TRUE	FALSE
ecl8_00957	ecl8_00957	ecl8_00957	0.159091	17.833	FALSE	TRUE	FALSE
rlmM	rlmM	ecl8_00958	0.120799	13.3217	FALSE	TRUE	FALSE
ydjF	ydjF	ecl8_00959	0.07173	6.36009	FALSE	TRUE	FALSE
fucU	fucU	ecl8_00960	0.0992908	10.4973	FALSE	TRUE	FALSE
fucK	fucK	ecl8_00961	0.0789288	7.51582	FALSE	TRUE	FALSE
fucI	fucI	ecl8_00962	0.0788288	7.50019	FALSE	TRUE	FALSE
fucP	fucP	ecl8_00963	0.129672	14.4167	FALSE	TRUE	FALSE
fucA	fucA	ecl8_00964	0.103395	11.0579	FALSE	TRUE	FALSE
fucO	fucO	ecl8_00965	0.078329	7.42191	FALSE	TRUE	FALSE
ygdG	ygdG	ecl8_00966	0.0608466	4.47284	FALSE	TRUE	FALSE
zraR_1	zraR_1	ecl8_00967	0.0761317	7.07432	FALSE	TRUE	FALSE
msuD_1	msuD_1	ecl8_00968	0.0767263	7.16895	FALSE	TRUE	FALSE
ecl8_00969	ecl8_00969	ecl8_00969	0.0693848	5.96898	FALSE	TRUE	FALSE
dmoA	dmoA	ecl8_00970	0.0760483	7.06102	FALSE	TRUE	FALSE
metN_1	metN_1	ecl8_00971	0.0703812	6.1361	FALSE	TRUE	FALSE
metI_1	metI_1	ecl8_00972	0.0872675	8.78199	FALSE	TRUE	FALSE
metQ_1	metQ_1	ecl8_00973	0.163823	18.3574	FALSE	TRUE	FALSE
ygcS	ygcS	ecl8_00974	0.157525	17.6581	FALSE	TRUE	FALSE
soxC	soxC	ecl8_00975	0.0710784	6.2522	FALSE	TRUE	FALSE
ssuA_1	ssuA_1	ecl8_00976	0.101911	10.8565	FALSE	TRUE	FALSE
sdaB	sdaB	ecl8_00977	0.0942982	9.79911	FALSE	TRUE	FALSE
sdaC_1	sdaC_1	ecl8_00978	0.103101	11.0181	FALSE	TRUE	FALSE
ppnN	ppnN	ecl8_00979	0.127193	14.1142	FALSE	TRUE	FALSE
queF	queF	ecl8_00980	0.113475	12.3895	FALSE	TRUE	FALSE
syd	syd	ecl8_00981	0.137363	15.339	FALSE	TRUE	FALSE
yqcC	yqcC	ecl8_00982	0.1	10.595	FALSE	TRUE	FALSE
truC	truC	ecl8_00983	0.0855346	8.52456	FALSE	TRUE	FALSE
ecl8_00984	ecl8_00984	ecl8_00984	0.155405	17.4203	FALSE	TRUE	FALSE
gudP_1	gudP_1	ecl8_00985	0.121212	13.3734	FALSE	TRUE	FALSE
gudX	gudX	ecl8_00986	0.0850112	8.44625	FALSE	TRUE	FALSE
gudD	gudD	ecl8_00987	0.105891	11.3934	FALSE	TRUE	FALSE
garK_2	garK_2	ecl8_00988	0.0710526	6.24792	FALSE	TRUE	FALSE
barA_1	barA_1	ecl8_00989	0.113636	12.4104	FALSE	TRUE	FALSE
barA_2	barA_2	ecl8_00990	0.112314	12.2392	FALSE	TRUE	FALSE
rlmD	rlmD	ecl8_00991	0.137165	15.3155	FALSE	TRUE	FALSE
relA	relA	ecl8_00992	0.114388	12.5072	FALSE	TRUE	FALSE
mazG	mazG	ecl8_00993	0.127525	14.1549	FALSE	TRUE	FALSE
pyrG_1	pyrG_1	ecl8_00994	0	-172.701	TRUE	FALSE	FALSE
eno	eno	ecl8_00995	0.013087	-9.52045	TRUE	FALSE	FALSE
lgrD	lgrD	ecl8_00996	0.136036	15.1815	FALSE	TRUE	FALSE
queE	queE	ecl8_00997	0.150298	16.8417	FALSE	TRUE	FALSE
queD	queD	ecl8_00998	0.188525	21.007	FALSE	TRUE	FALSE
cysJ	cysJ	ecl8_00999	0.105556	11.3485	FALSE	TRUE	FALSE
cysI	cysI	ecl8_01000	0.0974898	10.2476	FALSE	TRUE	FALSE
cysH_1	cysH_1	ecl8_01001	0.108844	11.7852	FALSE	TRUE	FALSE
ywaD	ywaD	ecl8_01002	0.123209	13.6226	FALSE	TRUE	FALSE
cysG_2	cysG_2	ecl8_01003	0.0819209	7.97836	FALSE	TRUE	FALSE
cysD	cysD	ecl8_01004	0.10231	10.9109	FALSE	TRUE	FALSE
cysN	cysN	ecl8_01005	0.102241	10.9014	FALSE	TRUE	FALSE
cysC	cysC	ecl8_01006	0.125413	13.8954	FALSE	TRUE	FALSE
ygbE	ygbE	ecl8_01007	0.165138	18.5021	FALSE	TRUE	FALSE
ftsB	ftsB	ecl8_01008	0.0345912	-1.25635	FALSE	FALSE	TRUE
ispD	ispD	ecl8_01009	0.00562588	-15.9424	TRUE	FALSE	FALSE
ispF	ispF	ecl8_01010	0.00833333	-13.0054	TRUE	FALSE	FALSE
truD	truD	ecl8_01011	0.100952	10.7257	FALSE	TRUE	FALSE
surE	surE	ecl8_01012	0.116798	12.8158	FALSE	TRUE	FALSE
pcm	pcm	ecl8_01013	0.0797448	7.64293	FALSE	TRUE	FALSE
nlpD_2	nlpD_2	ecl8_01014	0.116095	12.7261	FALSE	TRUE	FALSE
rpoS	rpoS	ecl8_01015	0.108761	11.7744	FALSE	TRUE	FALSE
ecl8_01016	ecl8_01016	ecl8_01016	0.0820106	7.99207	FALSE	TRUE	FALSE
hsrA_1	hsrA_1	ecl8_01017	0.0806318	7.78026	FALSE	TRUE	FALSE
dmlR_5	dmlR_5	ecl8_01018	0.0731982	6.60111	FALSE	TRUE	FALSE
hosA	hosA	ecl8_01019	0.0686275	5.84098	FALSE	TRUE	FALSE
ecdB	ecdB	ecl8_01020	0.0791246	7.54638	FALSE	TRUE	FALSE
edcC	edcC	ecl8_01021	0.10014	10.6143	FALSE	TRUE	FALSE
bsdD	bsdD	ecl8_01022	0.236287	25.8094	FALSE	TRUE	FALSE
hokA_2	hokA_2	ecl8_01023	0.228758	25.0749	FALSE	TRUE	FALSE
mutS	mutS	ecl8_01024	0.0960187	10.0418	FALSE	TRUE	FALSE
intA_2	intA_2	ecl8_01025	0.193548	21.53	FALSE	TRUE	FALSE
xerC_2	xerC_2	ecl8_01026	0.121005	13.3474	FALSE	TRUE	FALSE
ecl8_01027	ecl8_01027	ecl8_01027	0.154229	17.2877	FALSE	TRUE	FALSE
ecl8_01028	ecl8_01028	ecl8_01028	0.147661	16.5399	FALSE	TRUE	FALSE
ecl8_01029	ecl8_01029	ecl8_01029	0.0434397	0.937	FALSE	FALSE	TRUE
ecl8_01030	ecl8_01030	ecl8_01030	0.142516	15.9446	FALSE	TRUE	FALSE
ecl8_01031	ecl8_01031	ecl8_01031	0.0925926	9.55617	FALSE	TRUE	FALSE
ecl8_01032	ecl8_01032	ecl8_01032	0.136364	15.2204	FALSE	TRUE	FALSE
ecl8_01033	ecl8_01033	ecl8_01033	0.0153374	-8.25626	TRUE	FALSE	FALSE
ecl8_01034	ecl8_01034	ecl8_01034	0.0895582	9.11805	FALSE	TRUE	FALSE
ftsH_2	ftsH_2	ecl8_01035	0.283688	30.286	FALSE	TRUE	FALSE
ecl8_01036	ecl8_01036	ecl8_01036	0.0116959	-10.4021	TRUE	FALSE	FALSE
ecl8_01037	ecl8_01037	ecl8_01037	0.205502	22.7558	FALSE	TRUE	FALSE
hmuV_1	hmuV_1	ecl8_01038	0.1	10.595	FALSE	TRUE	FALSE
hmuU_1	hmuU_1	ecl8_01039	0.0692771	5.95082	FALSE	TRUE	FALSE
hmuT_1	hmuT_1	ecl8_01040	0.0818071	7.96094	FALSE	TRUE	FALSE
hemS	hemS	ecl8_01041	0.0813953	7.89781	FALSE	TRUE	FALSE
ecl8_01042	ecl8_01042	ecl8_01042	0.0939086	9.74382	FALSE	TRUE	FALSE
ecl8_01043	ecl8_01043	ecl8_01043	0.0748299	6.86566	FALSE	TRUE	FALSE
ilvI_1	ilvI_1	ecl8_01044	0.116959	12.8364	FALSE	TRUE	FALSE
ecl8_01045	ecl8_01045	ecl8_01045	0.221868	24.3962	FALSE	TRUE	FALSE
tsaR_1	tsaR_1	ecl8_01046	0.161036	18.0493	FALSE	TRUE	FALSE
ecl8_01047	ecl8_01047	ecl8_01047	0.0883838	8.94635	FALSE	TRUE	FALSE
mntB_1	mntB_1	ecl8_01048	0.0959064	10.0261	FALSE	TRUE	FALSE
mntB_2	mntB_2	ecl8_01049	0.0989399	10.4488	FALSE	TRUE	FALSE
fhuC_1	fhuC_1	ecl8_01050	0.0851582	8.46827	FALSE	TRUE	FALSE
hpf_2	hpf_2	ecl8_01051	0.108932	11.7969	FALSE	TRUE	FALSE
galR_2	galR_2	ecl8_01052	0.0934579	9.67972	FALSE	TRUE	FALSE
mak_1	mak_1	ecl8_01053	0.0699454	6.06317	FALSE	TRUE	FALSE
chbA_2	chbA_2	ecl8_01054	0.0984127	10.3758	FALSE	TRUE	FALSE
licC_3	licC_3	ecl8_01055	0.0801209	7.70127	FALSE	TRUE	FALSE
gmuB	gmuB	ecl8_01056	0.0984127	10.3758	FALSE	TRUE	FALSE
licC_4	licC_4	ecl8_01057	0.0888365	9.01267	FALSE	TRUE	FALSE
scrY_1	scrY_1	ecl8_01058	0.106129	11.4251	FALSE	TRUE	FALSE
ecl8_01059	ecl8_01059	ecl8_01059	0.0921113	9.48719	FALSE	TRUE	FALSE
gmuD_2	gmuD_2	ecl8_01060	0.101356	10.7809	FALSE	TRUE	FALSE
fhlA	fhlA	ecl8_01061	0.0998553	10.5751	FALSE	TRUE	FALSE
hypE	hypE	ecl8_01062	0.0761622	7.07919	FALSE	TRUE	FALSE
hypD	hypD	ecl8_01063	0.0882353	8.92454	FALSE	TRUE	FALSE
hypC	hypC	ecl8_01064	0.120879	13.3317	FALSE	TRUE	FALSE
hypB	hypB	ecl8_01065	0.0687285	5.85811	FALSE	TRUE	FALSE
hypA	hypA	ecl8_01066	0.0811594	7.86156	FALSE	TRUE	FALSE
hycA	hycA	ecl8_01067	0.113333	12.3712	FALSE	TRUE	FALSE
hyfA_1	hyfA_1	ecl8_01068	0.08867	8.98829	FALSE	TRUE	FALSE
hyfB	hyfB	ecl8_01069	0.091954	9.46461	FALSE	TRUE	FALSE
hycD	hycD	ecl8_01070	0.0909091	9.31406	FALSE	TRUE	FALSE
hycE	hycE	ecl8_01071	0.107602	11.6211	FALSE	TRUE	FALSE
nuoI_1	nuoI_1	ecl8_01072	0.121547	13.4154	FALSE	TRUE	FALSE
hycG	hycG	ecl8_01073	0.0833333	8.1934	FALSE	TRUE	FALSE
ecl8_01074	ecl8_01074	ecl8_01074	0.126521	14.0318	FALSE	TRUE	FALSE
hycI	hycI	ecl8_01075	0.0806794	7.78761	FALSE	TRUE	FALSE
symE	symE	ecl8_01076	0.152104	17.0472	FALSE	TRUE	FALSE
bglH_1	bglH_1	ecl8_01077	0.0905263	9.25868	FALSE	TRUE	FALSE
bglF_1	bglF_1	ecl8_01078	0.0803881	7.74261	FALSE	TRUE	FALSE
ascG_3	ascG_3	ecl8_01079	0.110454	11.9967	FALSE	TRUE	FALSE
hyfA_2	hyfA_2	ecl8_01080	0.092803	9.58627	FALSE	TRUE	FALSE
hypF	hypF	ecl8_01081	0.0697987	6.03856	FALSE	TRUE	FALSE
hoxN	hoxN	ecl8_01082	0.0769231	7.20016	FALSE	TRUE	FALSE
norW	norW	ecl8_01083	0.0643739	5.10568	FALSE	TRUE	FALSE
norV	norV	ecl8_01084	0.109731	11.9019	FALSE	TRUE	FALSE
norR	norR	ecl8_01085	0.0844616	8.36374	FALSE	TRUE	FALSE
gutQ	gutQ	ecl8_01086	0.0786749	7.47612	FALSE	TRUE	FALSE
srlR_1	srlR_1	ecl8_01087	0.0968992	10.1652	FALSE	TRUE	FALSE
ecl8_01088	ecl8_01088	ecl8_01088	0.0833333	8.1934	FALSE	TRUE	FALSE
srlD	srlD	ecl8_01089	0.0987179	10.4181	FALSE	TRUE	FALSE
srlB_1	srlB_1	ecl8_01090	0.0826446	8.0888	FALSE	TRUE	FALSE
srlE	srlE	ecl8_01091	0.117227	12.8705	FALSE	TRUE	FALSE
srlA	srlA	ecl8_01092	0.0797872	7.64952	FALSE	TRUE	FALSE
mltB	mltB	ecl8_01093	0.113889	12.4429	FALSE	TRUE	FALSE
fepC_1	fepC_1	ecl8_01094	0.0731364	6.59103	FALSE	TRUE	FALSE
mntB_3	mntB_3	ecl8_01095	0.104167	11.1621	FALSE	TRUE	FALSE
mntA	mntA	ecl8_01096	0.110353	11.9835	FALSE	TRUE	FALSE
pncC_1	pncC_1	ecl8_01097	0.0863454	8.64536	FALSE	TRUE	FALSE
recA	recA	ecl8_01098	0.0302172	-2.49899	FALSE	FALSE	TRUE
recX	recX	ecl8_01099	0.0738523	6.70757	FALSE	TRUE	FALSE
alaS	alaS	ecl8_01100	0.000761035	-30.2959	TRUE	FALSE	FALSE
csrA	csrA	ecl8_01101	0.0215054	-5.47071	TRUE	FALSE	FALSE
osmY_2	osmY_2	ecl8_01107	0.15873	17.7928	FALSE	TRUE	FALSE
yqaB	yqaB	ecl8_01108	0.10582	11.3839	FALSE	TRUE	FALSE
yqaA	yqaA	ecl8_01109	0.0955711	9.9789	FALSE	TRUE	FALSE
gshA	gshA	ecl8_01110	0.0937701	9.72413	FALSE	TRUE	FALSE
luxS	luxS	ecl8_01111	0.108527	11.7435	FALSE	TRUE	FALSE
nimR_1	nimR_1	ecl8_01112	0.0611979	4.53689	FALSE	TRUE	FALSE
leuA_1	leuA_1	ecl8_01113	0.0644007	5.11041	FALSE	TRUE	FALSE
emrB_1	emrB_1	ecl8_01114	0.100065	10.6039	FALSE	TRUE	FALSE
emrA_1	emrA_1	ecl8_01115	0.115942	12.7066	FALSE	TRUE	FALSE
mprA	mprA	ecl8_01116	0.109228	11.8358	FALSE	TRUE	FALSE
ecl8_01117	ecl8_01117	ecl8_01117	0.0863095	8.64003	FALSE	TRUE	FALSE
ygaZ_1	ygaZ_1	ecl8_01118	0.0990629	10.4658	FALSE	TRUE	FALSE
proX	proX	ecl8_01119	0.12012	13.2364	FALSE	TRUE	FALSE
proW	proW	ecl8_01120	0.106742	11.5068	FALSE	TRUE	FALSE
proV	proV	ecl8_01121	0.223608	24.5681	FALSE	TRUE	FALSE
nrdF	nrdF	ecl8_01122	0.154725	17.3437	FALSE	TRUE	FALSE
nrdE	nrdE	ecl8_01123	0.0788982	7.51104	FALSE	TRUE	FALSE
nrdI	nrdI	ecl8_01124	0.111922	12.1882	FALSE	TRUE	FALSE
nrdH	nrdH	ecl8_01125	0.0894309	9.09949	FALSE	TRUE	FALSE
ahpD_1	ahpD_1	ecl8_01126	0.134259	14.9696	FALSE	TRUE	FALSE
gabR_2	gabR_2	ecl8_01127	0.0820399	7.99655	FALSE	TRUE	FALSE
ygaM	ygaM	ecl8_01128	0.192529	21.4242	FALSE	TRUE	FALSE
ecl8_01129	ecl8_01129	ecl8_01129	0.247934	26.9317	FALSE	TRUE	FALSE
alaE	alaE	ecl8_01130	0.237778	25.954	FALSE	TRUE	FALSE
stpA	stpA	ecl8_01131	0.363184	37.376	FALSE	TRUE	FALSE
ecl8_01132	ecl8_01132	ecl8_01132	0.25	27.1292	FALSE	TRUE	FALSE
ecl8_01133	ecl8_01133	ecl8_01133	0.20598	22.8043	FALSE	TRUE	FALSE
ygaP	ygaP	ecl8_01134	0.106227	11.4383	FALSE	TRUE	FALSE
ygaV	ygaV	ecl8_01135	0.156667	17.562	FALSE	TRUE	FALSE
azoR_1	azoR_1	ecl8_01136	0.0874587	8.81022	FALSE	TRUE	FALSE
dmlR_6	dmlR_6	ecl8_01137	0.0913091	9.3718	FALSE	TRUE	FALSE
acoR_1	acoR_1	ecl8_01138	0.0634409	4.94043	FALSE	TRUE	FALSE
acoR_2	acoR_2	ecl8_01139	0.0807382	7.79668	FALSE	TRUE	FALSE
ald1	ald1	ecl8_01140	0.115713	12.6773	FALSE	TRUE	FALSE
fimA_1	fimA_1	ecl8_01141	0.24055	26.2221	FALSE	TRUE	FALSE
yraI_1	yraI_1	ecl8_01142	0.229261	25.1242	FALSE	TRUE	FALSE
fimD_2	fimD_2	ecl8_01143	0.112285	12.2354	FALSE	TRUE	FALSE
ecl8_01144	ecl8_01144	ecl8_01144	0.0812785	7.87987	FALSE	TRUE	FALSE
lpfB_1	lpfB_1	ecl8_01145	0.143969	16.1135	FALSE	TRUE	FALSE
fim_2	fim_2	ecl8_01146	0.17029	19.0648	FALSE	TRUE	FALSE
pheC	pheC	ecl8_01147	0.16397	18.3736	FALSE	TRUE	FALSE
ecl8_01148	ecl8_01148	ecl8_01148	0.114332	12.5	FALSE	TRUE	FALSE
fabG_3	fabG_3	ecl8_01149	0.0918239	9.44591	FALSE	TRUE	FALSE
ghrA_1	ghrA_1	ecl8_01150	0.0825295	8.07126	FALSE	TRUE	FALSE
cloR	cloR	ecl8_01151	0.115226	12.6149	FALSE	TRUE	FALSE
tcyC	tcyC	ecl8_01152	0.0861275	8.61297	FALSE	TRUE	FALSE
artJ_1	artJ_1	ecl8_01153	0.090796	9.29771	FALSE	TRUE	FALSE
efe_1	efe_1	ecl8_01154	0.079588	7.61856	FALSE	TRUE	FALSE
ecl8_01155	ecl8_01155	ecl8_01155	0.0717593	6.36493	FALSE	TRUE	FALSE
gbuA	gbuA	ecl8_01156	0.086225	8.62747	FALSE	TRUE	FALSE
cbl_1	cbl_1	ecl8_01157	0.0899123	9.16957	FALSE	TRUE	FALSE
nsrR_1	nsrR_1	ecl8_01158	0.10625	11.4413	FALSE	TRUE	FALSE
bepE_1	bepE_1	ecl8_01159	0.0827783	8.10914	FALSE	TRUE	FALSE
bepF	bepF	ecl8_01160	0.0986395	10.4073	FALSE	TRUE	FALSE
rob_1	rob_1	ecl8_01161	0.068306	5.78639	FALSE	TRUE	FALSE
ecl8_01162	ecl8_01162	ecl8_01162	0.0826446	8.0888	FALSE	TRUE	FALSE
pgrR_2	pgrR_2	ecl8_01163	0.0937853	9.7263	FALSE	TRUE	FALSE
ecl8_01164	ecl8_01164	ecl8_01164	0.113608	12.4067	FALSE	TRUE	FALSE
ecl8_01165	ecl8_01165	ecl8_01165	0.0943683	9.80904	FALSE	TRUE	FALSE
ecl8_01166	ecl8_01166	ecl8_01166	0.137523	15.3579	FALSE	TRUE	FALSE
ecl8_01167	ecl8_01167	ecl8_01167	0.0956522	9.99031	FALSE	TRUE	FALSE
ecl8_01168	ecl8_01168	ecl8_01168	0.0207156	-5.78626	TRUE	FALSE	FALSE
ecl8_01169	ecl8_01169	ecl8_01169	0.0107198	-11.0789	TRUE	FALSE	FALSE
intA_3	intA_3	ecl8_01170	0.18928	21.0859	FALSE	TRUE	FALSE
ecl8_01171	ecl8_01171	ecl8_01171	0.218391	24.051	FALSE	TRUE	FALSE
smpB	smpB	ecl8_01173	0.068323	5.78928	FALSE	TRUE	FALSE
ratA	ratA	ecl8_01174	0.111872	12.1817	FALSE	TRUE	FALSE
ecl8_01175	ecl8_01175	ecl8_01175	0.0962199	10.0701	FALSE	TRUE	FALSE
bamE_1	bamE_1	ecl8_01176	0.169591	18.9888	FALSE	TRUE	FALSE
recN	recN	ecl8_01177	0.0980746	10.3289	FALSE	TRUE	FALSE
nadK	nadK	ecl8_01178	0	-172.701	TRUE	FALSE	FALSE
grpE	grpE	ecl8_01179	0.00507614	-16.7004	TRUE	FALSE	FALSE
ecl8_01180	ecl8_01180	ecl8_01180	0.151515	16.9804	FALSE	TRUE	FALSE
ypjD	ypjD	ecl8_01181	0.165404	18.5314	FALSE	TRUE	FALSE
ffh	ffh	ecl8_01182	0.0029304	-20.6971	TRUE	FALSE	FALSE
rpsP	rpsP	ecl8_01183	0	-172.701	TRUE	FALSE	FALSE
rimM	rimM	ecl8_01184	0.00182149	-24.1055	TRUE	FALSE	FALSE
trmD	trmD	ecl8_01185	0.00520833	-16.5113	TRUE	FALSE	FALSE
rplS	rplS	ecl8_01186	0.00287356	-20.8382	TRUE	FALSE	FALSE
ecl8_01187	ecl8_01187	ecl8_01187	0.0697168	6.02481	FALSE	TRUE	FALSE
ecl8_01188	ecl8_01188	ecl8_01188	0.0634573	4.94336	FALSE	TRUE	FALSE
ecl8_01189	ecl8_01189	ecl8_01189	0.101449	10.7936	FALSE	TRUE	FALSE
dgcN	dgcN	ecl8_01190	0.111111	12.0826	FALSE	TRUE	FALSE
ecl8_01191	ecl8_01191	ecl8_01191	0.143137	16.0169	FALSE	TRUE	FALSE
aroF	aroF	ecl8_01192	0.0868347	8.71796	FALSE	TRUE	FALSE
tyrA	tyrA	ecl8_01193	0.0935829	9.69751	FALSE	TRUE	FALSE
ecl8_01194	ecl8_01194	ecl8_01194	0.134021	14.941	FALSE	TRUE	FALSE
pheA	pheA	ecl8_01195	0.135228	15.0853	FALSE	TRUE	FALSE
raiA	raiA	ecl8_01196	0.202381	22.4382	FALSE	TRUE	FALSE
bamD	bamD	ecl8_01197	0.0135501	-9.2454	TRUE	FALSE	FALSE
rluD	rluD	ecl8_01198	0.149847	16.7903	FALSE	TRUE	FALSE
yfiH	yfiH	ecl8_01199	0.120219	13.2488	FALSE	TRUE	FALSE
clpB	clpB	ecl8_01200	0.169775	19.0088	FALSE	TRUE	FALSE
kgtP_1	kgtP_1	ecl8_01205	0.0977675	10.2862	FALSE	TRUE	FALSE
ecl8_01206	ecl8_01206	ecl8_01206	0.0802469	7.72078	FALSE	TRUE	FALSE
pssA	pssA	ecl8_01207	0.00147493	-25.6086	TRUE	FALSE	FALSE
pat_1	pat_1	ecl8_01208	0.0897436	9.14503	FALSE	TRUE	FALSE
ecl8_01209	ecl8_01209	ecl8_01209	0.0944206	9.81645	FALSE	TRUE	FALSE
trxC	trxC	ecl8_01210	0.115023	12.5889	FALSE	TRUE	FALSE
yfiF	yfiF	ecl8_01211	0.105893	11.3937	FALSE	TRUE	FALSE
ung	ung	ecl8_01212	0.124638	13.7997	FALSE	TRUE	FALSE
grcA	grcA	ecl8_01213	0.101562	10.809	FALSE	TRUE	FALSE
srmB	srmB	ecl8_01214	0.0758258	7.02548	FALSE	TRUE	FALSE
yfiC	yfiC	ecl8_01215	0.108401	11.7268	FALSE	TRUE	FALSE
nadB	nadB	ecl8_01216	0.125309	13.8826	FALSE	TRUE	FALSE
rpoE	rpoE	ecl8_01217	0.0520833	2.7919	FALSE	FALSE	TRUE
rseA	rseA	ecl8_01218	0.0890937	9.05028	FALSE	TRUE	FALSE
rseB	rseB	ecl8_01219	0.104493	11.206	FALSE	TRUE	FALSE
rseC	rseC	ecl8_01220	0.127083	14.1008	FALSE	TRUE	FALSE
lepA	lepA	ecl8_01221	0.0494444	2.24949	FALSE	FALSE	TRUE
lepB	lepB	ecl8_01222	0.0112821	-10.6826	TRUE	FALSE	FALSE
rnc	rnc	ecl8_01223	0.00293686	-20.6812	TRUE	FALSE	FALSE
era	era	ecl8_01224	0.0121413	-10.1101	TRUE	FALSE	FALSE
recO	recO	ecl8_01225	0.0785908	7.46295	FALSE	TRUE	FALSE
pdxJ	pdxJ	ecl8_01226	0.00819672	-13.1305	TRUE	FALSE	FALSE
acpS	acpS	ecl8_01227	0	-172.701	TRUE	FALSE	FALSE
yfhL	yfhL	ecl8_01228	0.0766284	7.15339	FALSE	TRUE	FALSE
murR	murR	ecl8_01229	0.0883392	8.9398	FALSE	TRUE	FALSE
pgpC	pgpC	ecl8_01230	0.100629	10.6814	FALSE	TRUE	FALSE
tadA	tadA	ecl8_01231	0.0392157	-0.0649207	FALSE	FALSE	TRUE
mltF_1	mltF_1	ecl8_01232	0.096475	10.1058	FALSE	TRUE	FALSE
purL	purL	ecl8_01233	0.0887346	8.99775	FALSE	TRUE	FALSE
glrK	glrK	ecl8_01234	0.108298	11.7132	FALSE	TRUE	FALSE
qseG	qseG	ecl8_01235	0.084425	8.35824	FALSE	TRUE	FALSE
glrR	glrR	ecl8_01236	0.112855	12.3093	FALSE	TRUE	FALSE
glnB	glnB	ecl8_01237	0.112094	12.2106	FALSE	TRUE	FALSE
hmp	hmp	ecl8_01238	0.103275	11.0416	FALSE	TRUE	FALSE
glyA1	glyA1	ecl8_01239	0.00318979	-20.0849	TRUE	FALSE	FALSE
yphA_1	yphA_1	ecl8_01240	0.0729167	6.55512	FALSE	TRUE	FALSE
yphA_2	yphA_2	ecl8_01241	0.111111	12.0826	FALSE	TRUE	FALSE
nagC_1	nagC_1	ecl8_01242	0.116124	12.7298	FALSE	TRUE	FALSE
lapB_1	lapB_1	ecl8_01243	0.0937118	9.71585	FALSE	TRUE	FALSE
xylE	xylE	ecl8_01244	0.105776	11.378	FALSE	TRUE	FALSE
yphB	yphB	ecl8_01245	0.109113	11.8207	FALSE	TRUE	FALSE
hcaT	hcaT	ecl8_01246	0.0941073	9.77203	FALSE	TRUE	FALSE
ecl8_01247	ecl8_01247	ecl8_01247	0.0868545	8.72088	FALSE	TRUE	FALSE
ecl8_01248	ecl8_01248	ecl8_01248	0.100156	10.6165	FALSE	TRUE	FALSE
ecl8_01249	ecl8_01249	ecl8_01249	0.0744139	6.79853	FALSE	TRUE	FALSE
ecl8_01250	ecl8_01250	ecl8_01250	0.106332	11.4523	FALSE	TRUE	FALSE
suhB_1	suhB_1	ecl8_01251	0.00746269	-13.8377	TRUE	FALSE	FALSE
trmJ	trmJ	ecl8_01252	0.122449	13.528	FALSE	TRUE	FALSE
iscR	iscR	ecl8_01253	0.0691057	5.9219	FALSE	TRUE	FALSE
iscS	iscS	ecl8_01254	0.00987654	-11.7102	TRUE	FALSE	FALSE
iscU	iscU	ecl8_01255	0.0129199	-9.6218	TRUE	FALSE	FALSE
iscA	iscA	ecl8_01256	0.104938	11.2658	FALSE	TRUE	FALSE
hscB	hscB	ecl8_01257	0.0465116	1.62311	FALSE	FALSE	TRUE
hscA	hscA	ecl8_01258	0.0248514	-4.23129	TRUE	FALSE	FALSE
fdx	fdx	ecl8_01259	0.0267857	-3.57541	FALSE	FALSE	TRUE
iscX	iscX	ecl8_01260	0.0995025	10.5265	FALSE	TRUE	FALSE
pepB	pepB	ecl8_01261	0.0916861	9.4261	FALSE	TRUE	FALSE
ecl8_01262	ecl8_01262	ecl8_01262	0.0939511	9.74985	FALSE	TRUE	FALSE
ecl8_01263	ecl8_01263	ecl8_01263	0.107948	11.6669	FALSE	TRUE	FALSE
ecl8_01264	ecl8_01264	ecl8_01264	0.105991	11.4067	FALSE	TRUE	FALSE
sseA	sseA	ecl8_01265	0.0955711	9.9789	FALSE	TRUE	FALSE
yfhM	yfhM	ecl8_01266	0.080202	7.71383	FALSE	TRUE	FALSE
pbpC	pbpC	ecl8_01267	0.0580645	3.95721	FALSE	TRUE	FALSE
ndk	ndk	ecl8_01268	0.0833333	8.1934	FALSE	TRUE	FALSE
rlmN	rlmN	ecl8_01269	0.102828	10.9811	FALSE	TRUE	FALSE
rodZ	rodZ	ecl8_01270	0.0672691	5.60926	FALSE	TRUE	FALSE
ispG	ispG	ecl8_01271	0.0026738	-21.3569	TRUE	FALSE	FALSE
hisS	hisS	ecl8_01272	0.00313725	-20.2049	TRUE	FALSE	FALSE
ecl8_01273	ecl8_01273	ecl8_01273	0.078905	7.5121	FALSE	TRUE	FALSE
bamB	bamB	ecl8_01274	0.0746395	6.83497	FALSE	TRUE	FALSE
der	der	ecl8_01275	0.000676133	-31.1309	TRUE	FALSE	FALSE
ecl8_01276	ecl8_01276	ecl8_01276	0.0935185	9.68834	FALSE	TRUE	FALSE
yfgJ	yfgJ	ecl8_01277	0.109589	11.8833	FALSE	TRUE	FALSE
xseA	xseA	ecl8_01278	0.091954	9.46461	FALSE	TRUE	FALSE
guaB	guaB	ecl8_01279	0.0715746	6.33442	FALSE	TRUE	FALSE
guaA	guaA	ecl8_01280	0.0709759	6.23517	FALSE	TRUE	FALSE
betC	betC	ecl8_01281	0.184591	20.594	FALSE	TRUE	FALSE
chuR_2	chuR_2	ecl8_01282	0.156064	17.4944	FALSE	TRUE	FALSE
ecl8_01283	ecl8_01283	ecl8_01283	0.124899	13.832	FALSE	TRUE	FALSE
yofA_1	yofA_1	ecl8_01284	0.0765766	7.14516	FALSE	TRUE	FALSE
ecl8_01285	ecl8_01285	ecl8_01285	0.206897	22.8972	FALSE	TRUE	FALSE
pdeF	pdeF	ecl8_01286	0.144459	16.1705	FALSE	TRUE	FALSE
ppx	ppx	ecl8_01287	0.108937	11.7975	FALSE	TRUE	FALSE
ppk	ppk	ecl8_01288	0.110141	11.9557	FALSE	TRUE	FALSE
purN	purN	ecl8_01289	0.115265	12.6199	FALSE	TRUE	FALSE
purM	purM	ecl8_01290	0.100193	10.6215	FALSE	TRUE	FALSE
bglK	bglK	ecl8_01291	0.0738255	6.70322	FALSE	TRUE	FALSE
bglA_2	bglA_2	ecl8_01292	0.083682	8.24618	FALSE	TRUE	FALSE
upp	upp	ecl8_01293	0.148325	16.6162	FALSE	TRUE	FALSE
uraA	uraA	ecl8_01294	0.10101	10.7336	FALSE	TRUE	FALSE
hda	hda	ecl8_01295	0.00442478	-17.7072	TRUE	FALSE	FALSE
rpnA_1	rpnA_1	ecl8_01296	0.0986842	10.4135	FALSE	TRUE	FALSE
yfgD	yfgD	ecl8_01297	0.105556	11.3485	FALSE	TRUE	FALSE
bepA	bepA	ecl8_01298	0.102459	10.9311	FALSE	TRUE	FALSE
yhhT_2	yhhT_2	ecl8_01299	0.113936	12.449	FALSE	TRUE	FALSE
bcp	bcp	ecl8_01300	0.123142	13.6143	FALSE	TRUE	FALSE
gcvR	gcvR	ecl8_01301	0.174603	19.5309	FALSE	TRUE	FALSE
dapA_1	dapA_1	ecl8_01302	0	-172.701	TRUE	FALSE	FALSE
bamC	bamC	ecl8_01303	0.117874	12.9527	FALSE	TRUE	FALSE
purC	purC	ecl8_01304	0.0840336	8.29927	FALSE	TRUE	FALSE
ecl8_01305	ecl8_01305	ecl8_01305	0.0958904	10.0238	FALSE	TRUE	FALSE
tmcA	tmcA	ecl8_01306	0.0593812	4.20317	FALSE	TRUE	FALSE
ecl8_01307	ecl8_01307	ecl8_01307	0.0847701	8.41009	FALSE	TRUE	FALSE
ecl8_01308	ecl8_01308	ecl8_01308	0.0833333	8.1934	FALSE	TRUE	FALSE
dapE	dapE	ecl8_01309	0.00265957	-21.3952	TRUE	FALSE	FALSE
yffB	yffB	ecl8_01310	0.206215	22.8281	FALSE	TRUE	FALSE
acrB_1	acrB_1	ecl8_01311	0.0918433	9.4487	FALSE	TRUE	FALSE
gltD_2	gltD_2	ecl8_01312	0.0837115	8.25064	FALSE	TRUE	FALSE
nudK_1	nudK_1	ecl8_01313	0.0871022	8.75755	FALSE	TRUE	FALSE
ecl8_01314	ecl8_01314	ecl8_01314	0.0754537	6.9659	FALSE	TRUE	FALSE
tktB	tktB	ecl8_01315	0.0847118	8.40134	FALSE	TRUE	FALSE
tal	tal	ecl8_01316	0.0846395	8.39048	FALSE	TRUE	FALSE
maeB	maeB	ecl8_01317	0.0995614	10.5346	FALSE	TRUE	FALSE
eutS	eutS	ecl8_01318	0.202381	22.4382	FALSE	TRUE	FALSE
pduV_2	pduV_2	ecl8_01319	0.16875	18.8973	FALSE	TRUE	FALSE
eutQ	eutQ	ecl8_01320	0.0695652	5.99934	FALSE	TRUE	FALSE
ecl8_01321	ecl8_01321	ecl8_01321	0.0731103	6.58676	FALSE	TRUE	FALSE
eutD	eutD	ecl8_01322	0.0580138	3.94766	FALSE	TRUE	FALSE
eutM	eutM	ecl8_01323	0.0756014	6.98957	FALSE	TRUE	FALSE
eutN	eutN	ecl8_01324	0.100694	10.6903	FALSE	TRUE	FALSE
adhE_3	adhE_3	ecl8_01325	0.0669516	5.55468	FALSE	TRUE	FALSE
ftsA_1	ftsA_1	ecl8_01326	0.0607143	4.44867	FALSE	TRUE	FALSE
mdh_2	mdh_2	ecl8_01327	0.0715488	6.33015	FALSE	TRUE	FALSE
ecl8_01328	ecl8_01328	ecl8_01328	0.0592052	4.17049	FALSE	TRUE	FALSE
ecl8_01329	ecl8_01329	ecl8_01329	0.0527066	2.9173	FALSE	FALSE	TRUE
eutB_1	eutB_1	ecl8_01330	0.0690162	5.90677	FALSE	TRUE	FALSE
eutC_1	eutC_1	ecl8_01331	0.0733333	6.62315	FALSE	TRUE	FALSE
eutL	eutL	ecl8_01332	0.0727273	6.52412	FALSE	TRUE	FALSE
eutK	eutK	ecl8_01333	0.0843621	8.34877	FALSE	TRUE	FALSE
ecl8_01334	ecl8_01334	ecl8_01334	0.100665	10.6863	FALSE	TRUE	FALSE
hemF	hemF	ecl8_01335	0.0833333	8.1934	FALSE	TRUE	FALSE
amiA	amiA	ecl8_01336	0.0962199	10.0701	FALSE	TRUE	FALSE
ypeA	ypeA	ecl8_01337	0.133803	14.9149	FALSE	TRUE	FALSE
yfeZ	yfeZ	ecl8_01338	0.0888889	9.02034	FALSE	TRUE	FALSE
yfeY	yfeY	ecl8_01339	0.119792	13.1951	FALSE	TRUE	FALSE
yfeX	yfeX	ecl8_01340	0.111111	12.0826	FALSE	TRUE	FALSE
cysP	cysP	ecl8_01341	0.102262	10.9042	FALSE	TRUE	FALSE
cysT	cysT	ecl8_01342	0.110312	11.9781	FALSE	TRUE	FALSE
cysW_1	cysW_1	ecl8_01343	0.109589	11.8833	FALSE	TRUE	FALSE
cysA_1	cysA_1	ecl8_01344	0.0986301	10.406	FALSE	TRUE	FALSE
cysM	cysM	ecl8_01345	0.0559211	3.54902	FALSE	FALSE	TRUE
yybH	yybH	ecl8_01346	0.126263	14.0001	FALSE	TRUE	FALSE
ptsJ_1	ptsJ_1	ecl8_01347	0.0777521	7.3312	FALSE	TRUE	FALSE
pdxK	pdxK	ecl8_01348	0.0841984	8.32411	FALSE	TRUE	FALSE
ecl8_01349	ecl8_01349	ecl8_01349	0.0625	4.77226	FALSE	TRUE	FALSE
crr	crr	ecl8_01350	0.0568627	3.72958	FALSE	TRUE	FALSE
ptsI	ptsI	ecl8_01351	0.0908565	9.30645	FALSE	TRUE	FALSE
ptsH	ptsH	ecl8_01352	0.143411	16.0487	FALSE	TRUE	FALSE
cysK	cysK	ecl8_01353	0.0987654	10.4247	FALSE	TRUE	FALSE
cysZ	cysZ	ecl8_01354	0.154856	17.3584	FALSE	TRUE	FALSE
zipA	zipA	ecl8_01355	0.00564972	-15.9112	TRUE	FALSE	FALSE
ligA	ligA	ecl8_01356	0.000992063	-28.4216	TRUE	FALSE	FALSE
ecl8_01357	ecl8_01357	ecl8_01357	0.123288	13.6324	FALSE	TRUE	FALSE
ecl8_01358	ecl8_01358	ecl8_01358	0.112112	12.2129	FALSE	TRUE	FALSE
cynR_1	cynR_1	ecl8_01359	0.102481	10.9341	FALSE	TRUE	FALSE
gltX	gltX	ecl8_01364	0.00211416	-23.0411	TRUE	FALSE	FALSE
ecl8_01365	ecl8_01365	ecl8_01365	0.0814249	7.90235	FALSE	TRUE	FALSE
ecl8_01366	ecl8_01366	ecl8_01366	0.0932203	9.64586	FALSE	TRUE	FALSE
pdeA	pdeA	ecl8_01369	0.0953039	9.94126	FALSE	TRUE	FALSE
nupC_1	nupC_1	ecl8_01370	0.12552	13.9086	FALSE	TRUE	FALSE
mntH	mntH	ecl8_01371	0.122383	13.5198	FALSE	TRUE	FALSE
ecl8_01372	ecl8_01372	ecl8_01372	0.0988701	10.4392	FALSE	TRUE	FALSE
gpr	gpr	ecl8_01373	0.104733	11.2383	FALSE	TRUE	FALSE
ipdC	ipdC	ecl8_01374	0.0920578	9.47951	FALSE	TRUE	FALSE
yfeO	yfeO	ecl8_01375	0.0898058	9.15409	FALSE	TRUE	FALSE
glk	glk	ecl8_01376	0.108696	11.7657	FALSE	TRUE	FALSE
ypdB	ypdB	ecl8_01377	0.134146	14.9561	FALSE	TRUE	FALSE
ypdA	ypdA	ecl8_01378	0.121908	13.4605	FALSE	TRUE	FALSE
alaC	alaC	ecl8_01379	0.13251	14.7598	FALSE	TRUE	FALSE
yycB	yycB	ecl8_01380	0.0818713	7.97077	FALSE	TRUE	FALSE
guaD_1	guaD_1	ecl8_01381	0.0479303	1.92937	FALSE	FALSE	TRUE
cynR_2	cynR_2	ecl8_01382	0.0869087	8.72892	FALSE	TRUE	FALSE
ecl8_01383	ecl8_01383	ecl8_01383	0.15873	17.7928	FALSE	TRUE	FALSE
ecl8_01384	ecl8_01384	ecl8_01384	0.196687	21.8544	FALSE	TRUE	FALSE
intA_4	intA_4	ecl8_01386	0.203419	22.544	FALSE	TRUE	FALSE
ecl8_01387	ecl8_01387	ecl8_01387	0.0914561	9.39298	FALSE	TRUE	FALSE
ecl8_01388	ecl8_01388	ecl8_01388	0.216475	23.8601	FALSE	TRUE	FALSE
ecl8_01389	ecl8_01389	ecl8_01389	0.119403	13.1461	FALSE	TRUE	FALSE
ecl8_01390	ecl8_01390	ecl8_01390	0.141667	15.8454	FALSE	TRUE	FALSE
ecl8_01391	ecl8_01391	ecl8_01391	0.117647	12.9239	FALSE	TRUE	FALSE
ecl8_01392	ecl8_01392	ecl8_01392	0.122137	13.4891	FALSE	TRUE	FALSE
ecl8_01393	ecl8_01393	ecl8_01393	0.2	22.1947	FALSE	TRUE	FALSE
rdgC_1	rdgC_1	ecl8_01394	0.177489	19.8403	FALSE	TRUE	FALSE
lexA_1	lexA_1	ecl8_01395	0.00766283	-13.6387	TRUE	FALSE	FALSE
ecl8_01396	ecl8_01396	ecl8_01396	0.11039	11.9883	FALSE	TRUE	FALSE
ecl8_01397	ecl8_01397	ecl8_01397	0.162842	18.2492	FALSE	TRUE	FALSE
dam_2	dam_2	ecl8_01398	0.117284	12.8777	FALSE	TRUE	FALSE
rusA	rusA	ecl8_01399	0.134921	15.0486	FALSE	TRUE	FALSE
ecl8_01400	ecl8_01400	ecl8_01400	0.0946095	9.84319	FALSE	TRUE	FALSE
ecl8_01401	ecl8_01401	ecl8_01401	0.08981	9.1547	FALSE	TRUE	FALSE
ecl8_01403	ecl8_01403	ecl8_01403	0.114657	12.5419	FALSE	TRUE	FALSE
ecl8_01404	ecl8_01404	ecl8_01404	0.290404	30.9027	FALSE	TRUE	FALSE
ecl8_01405	ecl8_01405	ecl8_01405	0.294326	31.2612	FALSE	TRUE	FALSE
ecl8_01406	ecl8_01406	ecl8_01406	0.195238	21.7048	FALSE	TRUE	FALSE
ecl8_01407	ecl8_01407	ecl8_01407	0.0833333	8.1934	FALSE	TRUE	FALSE
ecl8_01408	ecl8_01408	ecl8_01408	0.131313	14.6154	FALSE	TRUE	FALSE
ecl8_01409	ecl8_01409	ecl8_01409	0.174797	19.5517	FALSE	TRUE	FALSE
ecl8_01410	ecl8_01410	ecl8_01410	0.156863	17.584	FALSE	TRUE	FALSE
ecl8_01411	ecl8_01411	ecl8_01411	0.153846	17.2445	FALSE	TRUE	FALSE
ecl8_01412	ecl8_01412	ecl8_01412	0.14245	15.9368	FALSE	TRUE	FALSE
ecl8_01413	ecl8_01413	ecl8_01413	0.143434	16.0514	FALSE	TRUE	FALSE
ecl8_01414	ecl8_01414	ecl8_01414	0.242057	26.3674	FALSE	TRUE	FALSE
ecl8_01415	ecl8_01415	ecl8_01415	0.306452	32.3615	FALSE	TRUE	FALSE
ecl8_01416	ecl8_01416	ecl8_01416	0.184553	20.59	FALSE	TRUE	FALSE
ecl8_01417	ecl8_01417	ecl8_01417	0.188737	21.0292	FALSE	TRUE	FALSE
ecl8_01418	ecl8_01418	ecl8_01418	0.132341	14.7394	FALSE	TRUE	FALSE
ecl8_01419	ecl8_01419	ecl8_01419	0.155763	17.4605	FALSE	TRUE	FALSE
ecl8_01420	ecl8_01420	ecl8_01420	0.111111	12.0826	FALSE	TRUE	FALSE
ecl8_01421	ecl8_01421	ecl8_01421	0.123123	13.6119	FALSE	TRUE	FALSE
ecl8_01422	ecl8_01422	ecl8_01422	0.140741	15.737	FALSE	TRUE	FALSE
ecl8_01423	ecl8_01423	ecl8_01423	0.161202	18.0678	FALSE	TRUE	FALSE
ecl8_01424	ecl8_01424	ecl8_01424	0.130081	14.4663	FALSE	TRUE	FALSE
ecl8_01425	ecl8_01425	ecl8_01425	0.164062	18.3839	FALSE	TRUE	FALSE
ecl8_01426	ecl8_01426	ecl8_01426	0.242424	26.4028	FALSE	TRUE	FALSE
bamE_2	bamE_2	ecl8_01427	0.238095	25.9847	FALSE	TRUE	FALSE
ecl8_01428	ecl8_01428	ecl8_01428	0.0918728	9.45294	FALSE	TRUE	FALSE
ecl8_01429	ecl8_01429	ecl8_01429	0.122153	13.4911	FALSE	TRUE	FALSE
ecl8_01430	ecl8_01430	ecl8_01430	0.11811	12.9826	FALSE	TRUE	FALSE
ecl8_01431	ecl8_01431	ecl8_01431	0.109482	11.8692	FALSE	TRUE	FALSE
ecl8_01432	ecl8_01432	ecl8_01432	0.218663	24.0781	FALSE	TRUE	FALSE
ecl8_01433	ecl8_01433	ecl8_01433	0.265306	28.5774	FALSE	TRUE	FALSE
ecl8_01434	ecl8_01434	ecl8_01434	0.280303	29.9737	FALSE	TRUE	FALSE
ecl8_01435	ecl8_01435	ecl8_01435	0.30303	32.0521	FALSE	TRUE	FALSE
ecl8_01436	ecl8_01436	ecl8_01436	0.296296	31.4407	FALSE	TRUE	FALSE
ecl8_01437	ecl8_01437	ecl8_01437	0.25	27.1292	FALSE	TRUE	FALSE
ecl8_01438	ecl8_01438	ecl8_01438	0.228495	25.0491	FALSE	TRUE	FALSE
yfdC	yfdC	ecl8_01439	0.150538	16.8691	FALSE	TRUE	FALSE
mlaA	mlaA	ecl8_01440	0.132546	14.764	FALSE	TRUE	FALSE
fadL	fadL	ecl8_01441	0.111111	12.0826	FALSE	TRUE	FALSE
ecl8_01442	ecl8_01442	ecl8_01442	0.140351	15.6913	FALSE	TRUE	FALSE
fadI	fadI	ecl8_01443	0.0823799	8.04846	FALSE	TRUE	FALSE
fadJ	fadJ	ecl8_01444	0.0909091	9.31406	FALSE	TRUE	FALSE
sixA	sixA	ecl8_01445	0.105943	11.4004	FALSE	TRUE	FALSE
smrA_1	smrA_1	ecl8_01446	0.112319	12.2398	FALSE	TRUE	FALSE
prmB	prmB	ecl8_01447	0.121115	13.3612	FALSE	TRUE	FALSE
aroC	aroC	ecl8_01448	0.0672192	5.60069	FALSE	TRUE	FALSE
mepA	mepA	ecl8_01449	0.0909091	9.31406	FALSE	TRUE	FALSE
yfcA	yfcA	ecl8_01450	0.0987654	10.4247	FALSE	TRUE	FALSE
epmC	epmC	ecl8_01451	0.0983607	10.3686	FALSE	TRUE	FALSE
ecl8_01452	ecl8_01452	ecl8_01452	0.12766	14.1714	FALSE	TRUE	FALSE
mnmC	mnmC	ecl8_01453	0.0723982	6.47014	FALSE	TRUE	FALSE
fabB	fabB	ecl8_01454	0.002457	-21.9643	TRUE	FALSE	FALSE
yfcJ	yfcJ	ecl8_01455	0.0901361	9.20208	FALSE	TRUE	FALSE
flk	flk	ecl8_01456	0.0787321	7.48507	FALSE	TRUE	FALSE
pdxB	pdxB	ecl8_01457	0.0941073	9.77203	FALSE	TRUE	FALSE
usg	usg	ecl8_01458	0.0601578	4.3466	FALSE	TRUE	FALSE
truA	truA	ecl8_01459	0.0836408	8.23995	FALSE	TRUE	FALSE
dedA	dedA	ecl8_01460	0.0878788	8.87213	FALSE	TRUE	FALSE
accD	accD	ecl8_01461	0.00304878	-20.4114	TRUE	FALSE	FALSE
folC	folC	ecl8_01462	0.00315209	-20.1708	TRUE	FALSE	FALSE
dedD	dedD	ecl8_01463	0.0623188	4.7397	FALSE	TRUE	FALSE
cvpA	cvpA	ecl8_01464	0.102249	10.9026	FALSE	TRUE	FALSE
purF	purF	ecl8_01465	0.0823452	8.04317	FALSE	TRUE	FALSE
ubiX	ubiX	ecl8_01466	0.0210526	-5.65041	TRUE	FALSE	FALSE
argT	argT	ecl8_01467	0.0893997	9.09495	FALSE	TRUE	FALSE
hisJ_1	hisJ_1	ecl8_01468	0.0957854	10.0091	FALSE	TRUE	FALSE
hisQ_1	hisQ_1	ecl8_01469	0.0931587	9.63706	FALSE	TRUE	FALSE
hisM	hisM	ecl8_01470	0.110181	11.961	FALSE	TRUE	FALSE
hisP	hisP	ecl8_01471	0.0723514	6.46246	FALSE	TRUE	FALSE
ecl8_01472	ecl8_01472	ecl8_01472	0.0662879	5.4401	FALSE	TRUE	FALSE
ecl8_01473	ecl8_01473	ecl8_01473	0.0894855	9.10744	FALSE	TRUE	FALSE
folX	folX	ecl8_01474	0.143251	16.0301	FALSE	TRUE	FALSE
yfcG_1	yfcG_1	ecl8_01475	0.0857143	8.55139	FALSE	TRUE	FALSE
yfcF	yfcF	ecl8_01476	0.0610329	4.50683	FALSE	TRUE	FALSE
yfcE	yfcE	ecl8_01477	0.105072	11.2838	FALSE	TRUE	FALSE
yfcD	yfcD	ecl8_01478	0.0996377	10.5451	FALSE	TRUE	FALSE
pta	pta	ecl8_01479	0.0614525	4.58316	FALSE	TRUE	FALSE
ackA	ackA	ecl8_01480	0.0714879	6.32008	FALSE	TRUE	FALSE
ecl8_01481	ecl8_01481	ecl8_01481	0.0964912	10.1081	FALSE	TRUE	FALSE
ecl8_01482	ecl8_01482	ecl8_01482	0.161616	18.1136	FALSE	TRUE	FALSE
hxpA	hxpA	ecl8_01483	0.106061	11.416	FALSE	TRUE	FALSE
sdcS	sdcS	ecl8_01484	0.0741953	6.76318	FALSE	TRUE	FALSE
yfbR	yfbR	ecl8_01485	0.126667	14.0497	FALSE	TRUE	FALSE
alaA	alaA	ecl8_01486	0.1133	12.367	FALSE	TRUE	FALSE
cmpR_1	cmpR_1	ecl8_01487	0.15534	17.4129	FALSE	TRUE	FALSE
ndhC	ndhC	ecl8_01488	0.133333	14.8586	FALSE	TRUE	FALSE
nuoB	nuoB	ecl8_01489	0.0962963	10.0808	FALSE	TRUE	FALSE
nuoC	nuoC	ecl8_01490	0.0934218	9.67457	FALSE	TRUE	FALSE
nuoE	nuoE	ecl8_01491	0.0858283	8.5684	FALSE	TRUE	FALSE
nuoF	nuoF	ecl8_01492	0.083707	8.24996	FALSE	TRUE	FALSE
nuoG	nuoG	ecl8_01493	0.0814081	7.89977	FALSE	TRUE	FALSE
nuoH	nuoH	ecl8_01494	0.0746421	6.83539	FALSE	TRUE	FALSE
nuoI_2	nuoI_2	ecl8_01495	0.0902394	9.21708	FALSE	TRUE	FALSE
nuoJ	nuoJ	ecl8_01496	0.0918919	9.45569	FALSE	TRUE	FALSE
nuoK	nuoK	ecl8_01497	0.108911	11.7941	FALSE	TRUE	FALSE
nuoL	nuoL	ecl8_01498	0.0928339	9.59068	FALSE	TRUE	FALSE
nuoM	nuoM	ecl8_01499	0.0830065	8.14383	FALSE	TRUE	FALSE
nuoN	nuoN	ecl8_01500	0.0816187	7.93207	FALSE	TRUE	FALSE
rbn_1	rbn_1	ecl8_01501	0.0890337	9.0415	FALSE	TRUE	FALSE
ecl8_01502	ecl8_01502	ecl8_01502	0.0936819	9.7116	FALSE	TRUE	FALSE
menF	menF	ecl8_01503	0.0534884	3.07323	FALSE	FALSE	TRUE
menD	menD	ecl8_01504	0.0664273	5.46423	FALSE	TRUE	FALSE
menH	menH	ecl8_01505	0.0619236	4.66845	FALSE	TRUE	FALSE
menB	menB	ecl8_01506	0.0606061	4.42887	FALSE	TRUE	FALSE
menC	menC	ecl8_01507	0.0600414	4.32518	FALSE	TRUE	FALSE
menE	menE	ecl8_01508	0.0718954	6.3874	FALSE	TRUE	FALSE
nudI	nudI	ecl8_01509	0.0657277	5.34285	FALSE	TRUE	FALSE
rpnA_2	rpnA_2	ecl8_01510	0.081741	7.95081	FALSE	TRUE	FALSE
ecl8_01511	ecl8_01511	ecl8_01511	0.101289	10.7717	FALSE	TRUE	FALSE
pncC_2	pncC_2	ecl8_01512	0.0735171	6.65309	FALSE	TRUE	FALSE
rhmR	rhmR	ecl8_01513	0.0903308	9.23034	FALSE	TRUE	FALSE
rhmD	rhmD	ecl8_01514	0.0845771	8.38111	FALSE	TRUE	FALSE
rhmT_1	rhmT_1	ecl8_01515	0.0801282	7.7024	FALSE	TRUE	FALSE
rhmT_2	rhmT_2	ecl8_01516	0.0642202	5.07856	FALSE	TRUE	FALSE
rhmA	rhmA	ecl8_01517	0.0671642	5.59124	FALSE	TRUE	FALSE
glpC	glpC	ecl8_01518	0.0771841	7.2415	FALSE	TRUE	FALSE
glpB	glpB	ecl8_01519	0.0507937	2.52918	FALSE	FALSE	TRUE
glpA	glpA	ecl8_01520	0.0813309	7.88791	FALSE	TRUE	FALSE
glpT_1	glpT_1	ecl8_01521	0.0734967	6.64975	FALSE	TRUE	FALSE
glpQ	glpQ	ecl8_01522	0.0877684	8.85588	FALSE	TRUE	FALSE
ascD	ascD	ecl8_01523	0.0823529	8.04435	FALSE	TRUE	FALSE
nrdB	nrdB	ecl8_01524	0	-172.701	TRUE	FALSE	FALSE
nrdA	nrdA	ecl8_01525	0.00218723	-22.798	TRUE	FALSE	FALSE
ubiG	ubiG	ecl8_01526	0.0109739	-10.8975	TRUE	FALSE	FALSE
gyrA	gyrA	ecl8_01527	0.00265453	-21.4089	TRUE	FALSE	FALSE
atoB	atoB	ecl8_01528	0.0548523	3.3417	FALSE	FALSE	TRUE
atoE	atoE	ecl8_01529	0.0597128	4.26455	FALSE	TRUE	FALSE
atoA	atoA	ecl8_01530	0.0614439	4.5816	FALSE	TRUE	FALSE
atoD	atoD	ecl8_01531	0.0573152	3.81564	FALSE	TRUE	FALSE
atoC	atoC	ecl8_01532	0.0613276	4.56047	FALSE	TRUE	FALSE
atoS	atoS	ecl8_01533	0.072643	6.5103	FALSE	TRUE	FALSE
rcsC	rcsC	ecl8_01534	0.0781415	7.39247	FALSE	TRUE	FALSE
rcsB	rcsB	ecl8_01535	0.0890937	9.05028	FALSE	TRUE	FALSE
rcsD	rcsD	ecl8_01536	0.103837	11.1177	FALSE	TRUE	FALSE
ompC	ompC	ecl8_01537	0.147541	16.5261	FALSE	TRUE	FALSE
apbE_1	apbE_1	ecl8_01538	0.0598291	4.28603	FALSE	TRUE	FALSE
ada_2	ada_2	ecl8_01539	0.0497653	2.31646	FALSE	FALSE	TRUE
alkB	alkB	ecl8_01540	0.0443425	1.14207	FALSE	FALSE	TRUE
yojI	yojI	ecl8_01541	0.0590024	4.13277	FALSE	TRUE	FALSE
ecl8_01542	ecl8_01542	ecl8_01542	0.0626305	4.79568	FALSE	TRUE	FALSE
bicA	bicA	ecl8_01543	0.0766747	7.16075	FALSE	TRUE	FALSE
mqo_1	mqo_1	ecl8_01544	0.0862385	8.62947	FALSE	TRUE	FALSE
eco	eco	ecl8_01545	0.046748	1.67457	FALSE	FALSE	TRUE
ecl8_01546	ecl8_01546	ecl8_01546	0.0936937	9.71327	FALSE	TRUE	FALSE
yejM	yejM	ecl8_01548	0.0567859	3.71492	FALSE	TRUE	FALSE
ecl8_01549	ecl8_01549	ecl8_01549	0.0151515	-8.35429	TRUE	FALSE	FALSE
yejK	yejK	ecl8_01550	0.093254	9.65065	FALSE	TRUE	FALSE
glcR_1	glcR_1	ecl8_01551	0.0748031	6.86135	FALSE	TRUE	FALSE
nudK_2	nudK_2	ecl8_01552	0.0720268	6.40905	FALSE	TRUE	FALSE
nylB	nylB	ecl8_01553	0.0924631	9.53763	FALSE	TRUE	FALSE
allS_2	allS_2	ecl8_01554	0.0619369	4.67086	FALSE	TRUE	FALSE
rplY	rplY	ecl8_01555	0	-172.701	TRUE	FALSE	FALSE
radD	radD	ecl8_01556	0.0746439	6.83567	FALSE	TRUE	FALSE
rsuA	rsuA	ecl8_01557	0.0777778	7.33524	FALSE	TRUE	FALSE
bcr_2	bcr_2	ecl8_01558	0.0835422	8.22503	FALSE	TRUE	FALSE
yejG	yejG	ecl8_01559	0.101449	10.7936	FALSE	TRUE	FALSE
yejF_2	yejF_2	ecl8_01560	0.0672956	5.61381	FALSE	TRUE	FALSE
yejE	yejE	ecl8_01561	0.0643275	5.0975	FALSE	TRUE	FALSE
yejB	yejB	ecl8_01562	0.060274	4.36796	FALSE	TRUE	FALSE
appA_2	appA_2	ecl8_01563	0.0786268	7.46859	FALSE	TRUE	FALSE
pdeN	pdeN	ecl8_01564	0.0966091	10.1246	FALSE	TRUE	FALSE
mepS_1	mepS_1	ecl8_01565	0.175439	19.6206	FALSE	TRUE	FALSE
lpxT	lpxT	ecl8_01566	0.138418	15.4638	FALSE	TRUE	FALSE
yeiR	yeiR	ecl8_01567	0.0787321	7.48507	FALSE	TRUE	FALSE
por_1	por_1	ecl8_01568	0.0702113	6.1077	FALSE	TRUE	FALSE
uxuA_2	uxuA_2	ecl8_01569	0.110831	12.0461	FALSE	TRUE	FALSE
yeiP	yeiP	ecl8_01570	0.209424	23.1527	FALSE	TRUE	FALSE
ecl8_01571	ecl8_01571	ecl8_01571	0.302564	32.0099	FALSE	TRUE	FALSE
setB	setB	ecl8_01572	0.0879865	8.88797	FALSE	TRUE	FALSE
fruB_1	fruB_1	ecl8_01573	0.0557029	3.50692	FALSE	FALSE	TRUE
lacC	lacC	ecl8_01574	0.0777423	7.32965	FALSE	TRUE	FALSE
fruA_1	fruA_1	ecl8_01575	0.0707965	6.20533	FALSE	TRUE	FALSE
nfo	nfo	ecl8_01576	0.0736842	6.68026	FALSE	TRUE	FALSE
ecl8_01577	ecl8_01577	ecl8_01577	0.0733333	6.62315	FALSE	TRUE	FALSE
cmpR_2	cmpR_2	ecl8_01578	0.0853518	8.49724	FALSE	TRUE	FALSE
lysP	lysP	ecl8_01579	0.121088	13.358	FALSE	TRUE	FALSE
ecl8_01580	ecl8_01580	ecl8_01580	0.368957	37.8757	FALSE	TRUE	FALSE
ecl8_01581	ecl8_01581	ecl8_01581	0.293103	31.1496	FALSE	TRUE	FALSE
cirA	cirA	ecl8_01582	0.0861196	8.61178	FALSE	TRUE	FALSE
yeiG	yeiG	ecl8_01583	0.0839329	8.28407	FALSE	TRUE	FALSE
folE	folE	ecl8_01584	0.00448431	-17.6095	TRUE	FALSE	FALSE
ecl8_01585	ecl8_01585	ecl8_01585	0.1019	10.855	FALSE	TRUE	FALSE
galS	galS	ecl8_01586	0.0918866	9.45493	FALSE	TRUE	FALSE
mglB	mglB	ecl8_01587	0.134134	14.9546	FALSE	TRUE	FALSE
mglA_1	mglA_1	ecl8_01588	0.161736	18.1269	FALSE	TRUE	FALSE
mglC	mglC	ecl8_01589	0.136499	15.2365	FALSE	TRUE	FALSE
ecl8_01590	ecl8_01590	ecl8_01590	0.111576	12.1432	FALSE	TRUE	FALSE
cdd	cdd	ecl8_01591	0.0971751	10.2037	FALSE	TRUE	FALSE
yohK_1	yohK_1	ecl8_01592	0.114943	12.5785	FALSE	TRUE	FALSE
ecl8_01593	ecl8_01593	ecl8_01593	0.122807	13.5726	FALSE	TRUE	FALSE
dusC	dusC	ecl8_01594	0.12433	13.7617	FALSE	TRUE	FALSE
oprB	oprB	ecl8_01595	0.151648	16.9955	FALSE	TRUE	FALSE
bglG	bglG	ecl8_01596	0.0899281	9.17186	FALSE	TRUE	FALSE
bglF_2	bglF_2	ecl8_01597	0.0837359	8.25433	FALSE	TRUE	FALSE
bglB	bglB	ecl8_01598	0.074552	6.82084	FALSE	TRUE	FALSE
oprM_2	oprM_2	ecl8_01599	0.101389	10.7853	FALSE	TRUE	FALSE
yohD	yohD	ecl8_01600	0.0736842	6.68026	FALSE	TRUE	FALSE
yohC	yohC	ecl8_01601	0.107143	11.5602	FALSE	TRUE	FALSE
pbpG	pbpG	ecl8_01602	0.0830705	8.15353	FALSE	TRUE	FALSE
pat_2	pat_2	ecl8_01603	0.0756757	7.00146	FALSE	TRUE	FALSE
dld	dld	ecl8_01604	0.0927835	9.58348	FALSE	TRUE	FALSE
ecl8_01605	ecl8_01605	ecl8_01605	0.0883377	8.93957	FALSE	TRUE	FALSE
yehZ	yehZ	ecl8_01606	0.0686275	5.84098	FALSE	TRUE	FALSE
yehY	yehY	ecl8_01607	0.0544041	3.25397	FALSE	FALSE	TRUE
yehX	yehX	ecl8_01608	0.0601266	4.34086	FALSE	TRUE	FALSE
yehW	yehW	ecl8_01609	0.0799458	7.67412	FALSE	TRUE	FALSE
ecl8_01610	ecl8_01610	ecl8_01610	0.0614035	4.57427	FALSE	TRUE	FALSE
btsS	btsS	ecl8_01611	0.0742029	6.7644	FALSE	TRUE	FALSE
btsR	btsR	ecl8_01612	0.0722222	6.44122	FALSE	TRUE	FALSE
ecl8_01613	ecl8_01613	ecl8_01613	0.0806794	7.78761	FALSE	TRUE	FALSE
metG	metG	ecl8_01614	0.010279	-11.403	TRUE	FALSE	FALSE
apbC	apbC	ecl8_01615	0.0891892	9.06422	FALSE	TRUE	FALSE
yafP_1	yafP_1	ecl8_01616	0.0627706	4.82078	FALSE	TRUE	FALSE
rcnB_1	rcnB_1	ecl8_01617	0.0849057	8.43043	FALSE	TRUE	FALSE
dmlR_7	dmlR_7	ecl8_01618	0.06	4.31755	FALSE	TRUE	FALSE
adeQ	adeQ	ecl8_01619	0.0625	4.77226	FALSE	TRUE	FALSE
ade2	ade2	ecl8_01620	0.0601545	4.346	FALSE	TRUE	FALSE
oxyR_1	oxyR_1	ecl8_01621	0.084153	8.31727	FALSE	TRUE	FALSE
uspA_2	uspA_2	ecl8_01622	0.108747	11.7725	FALSE	TRUE	FALSE
thiM	thiM	ecl8_01623	0.0736434	6.67363	FALSE	TRUE	FALSE
thiD	thiD	ecl8_01624	0.0811486	7.85989	FALSE	TRUE	FALSE
fbaB	fbaB	ecl8_01625	0.101614	10.8161	FALSE	TRUE	FALSE
csbX_1	csbX_1	ecl8_01626	0.0794393	7.59542	FALSE	TRUE	FALSE
araB_1	araB_1	ecl8_01627	0.0478856	1.91982	FALSE	FALSE	TRUE
rbtD	rbtD	ecl8_01628	0.0693333	5.9603	FALSE	TRUE	FALSE
degA	degA	ecl8_01629	0.0628743	4.83934	FALSE	TRUE	FALSE
lsrR_2	lsrR_2	ecl8_01630	0.0679406	5.72415	FALSE	TRUE	FALSE
mtlK	mtlK	ecl8_01631	0.0716374	6.3448	FALSE	TRUE	FALSE
xylB_2	xylB_2	ecl8_01632	0.0732323	6.60668	FALSE	TRUE	FALSE
xylB_3	xylB_3	ecl8_01633	0.0744048	6.79706	FALSE	TRUE	FALSE
csbX_2	csbX_2	ecl8_01634	0.0899844	9.18005	FALSE	TRUE	FALSE
hxpB_1	hxpB_1	ecl8_01635	0.0633484	4.92398	FALSE	TRUE	FALSE
gci	gci	ecl8_01636	0.0718615	6.3818	FALSE	TRUE	FALSE
ddpA_1	ddpA_1	ecl8_01637	0.0745533	6.82105	FALSE	TRUE	FALSE
ddpB	ddpB	ecl8_01638	0.088632	8.98273	FALSE	TRUE	FALSE
ddpC_2	ddpC_2	ecl8_01639	0.0662252	5.42924	FALSE	TRUE	FALSE
oppD_2	oppD_2	ecl8_01640	0.0787037	7.48062	FALSE	TRUE	FALSE
oppF_2	oppF_2	ecl8_01641	0.0917313	9.43259	FALSE	TRUE	FALSE
yegS	yegS	ecl8_01642	0.0713489	6.29707	FALSE	TRUE	FALSE
ydcP_1	ydcP_1	ecl8_01643	0.0814978	7.91353	FALSE	TRUE	FALSE
baeR	baeR	ecl8_01644	0.0622407	4.72563	FALSE	TRUE	FALSE
baeS	baeS	ecl8_01645	0.0703178	6.1255	FALSE	TRUE	FALSE
mdtD	mdtD	ecl8_01646	0.0762712	7.09656	FALSE	TRUE	FALSE
mdtC	mdtC	ecl8_01647	0.0705003	6.15598	FALSE	TRUE	FALSE
mdtB	mdtB	ecl8_01648	0.0790906	7.54108	FALSE	TRUE	FALSE
mdtA_1	mdtA_1	ecl8_01649	0.0750605	6.90278	FALSE	TRUE	FALSE
dctA_2	dctA_2	ecl8_01650	0.106667	11.4968	FALSE	TRUE	FALSE
ecl8_01651	ecl8_01651	ecl8_01651	0.21732	23.9444	FALSE	TRUE	FALSE
ecl8_01652	ecl8_01652	ecl8_01652	0.0212766	-5.56112	TRUE	FALSE	FALSE
phoP_1	phoP_1	ecl8_01653	0.122507	13.5352	FALSE	TRUE	FALSE
walK	walK	ecl8_01654	0.0721594	6.43088	FALSE	TRUE	FALSE
dnaK_1	dnaK_1	ecl8_01655	0.0672579	5.60734	FALSE	TRUE	FALSE
alkA	alkA	ecl8_01656	0.0706714	6.1845	FALSE	TRUE	FALSE
udk	udk	ecl8_01657	0.0560748	3.57863	FALSE	FALSE	TRUE
dcd	dcd	ecl8_01658	0.0515464	2.68305	FALSE	FALSE	TRUE
ecl8_01659	ecl8_01659	ecl8_01659	0.0795455	7.61194	FALSE	TRUE	FALSE
ecl8_01660	ecl8_01660	ecl8_01660	0.0984848	10.3859	FALSE	TRUE	FALSE
galF	galF	ecl8_01661	0.113712	12.4202	FALSE	TRUE	FALSE
ecl8_01662	ecl8_01662	ecl8_01662	0.187302	20.8789	FALSE	TRUE	FALSE
ecl8_01663	ecl8_01663	ecl8_01663	0.195258	21.7069	FALSE	TRUE	FALSE
ecl8_01664	ecl8_01664	ecl8_01664	0.248021	26.9401	FALSE	TRUE	FALSE
ecl8_01665	ecl8_01665	ecl8_01665	0.158598	17.7781	FALSE	TRUE	FALSE
kanF	kanF	ecl8_01666	0.110492	12.0017	FALSE	TRUE	FALSE
ecl8_01667	ecl8_01667	ecl8_01667	0.106952	11.5348	FALSE	TRUE	FALSE
ecl8_01668	ecl8_01668	ecl8_01668	0.128535	14.2782	FALSE	TRUE	FALSE
ecl8_01669	ecl8_01669	ecl8_01669	0.113178	12.3512	FALSE	TRUE	FALSE
wzxC	wzxC	ecl8_01670	0.0946502	9.84895	FALSE	TRUE	FALSE
ecl8_01671	ecl8_01671	ecl8_01671	0.135632	15.1334	FALSE	TRUE	FALSE
oatWY	oatWY	ecl8_01672	0.115097	12.5984	FALSE	TRUE	FALSE
wcaJ	wcaJ	ecl8_01673	0.130901	14.5657	FALSE	TRUE	FALSE
gnd	gnd	ecl8_01674	0.220327	24.2434	FALSE	TRUE	FALSE
manC1	manC1	ecl8_01675	0.120056	13.2284	FALSE	TRUE	FALSE
algC	algC	ecl8_01676	0.103574	11.0821	FALSE	TRUE	FALSE
ugd	ugd	ecl8_01677	0.0565553	3.67084	FALSE	TRUE	FALSE
wbgU	wbgU	ecl8_01678	0.0497512	2.31354	FALSE	FALSE	TRUE
tagG	tagG	ecl8_01679	0.173177	19.3772	FALSE	TRUE	FALSE
tagH	tagH	ecl8_01680	0.291498	31.0028	FALSE	TRUE	FALSE
gspA	gspA	ecl8_01681	0.170359	19.0722	FALSE	TRUE	FALSE
rfbD	rfbD	ecl8_01682	0.252814	27.3973	FALSE	TRUE	FALSE
ecl8_01683	ecl8_01683	ecl8_01683	0.232662	25.4567	FALSE	TRUE	FALSE
pglA	pglA	ecl8_01684	0.158267	17.7411	FALSE	TRUE	FALSE
epsJ_3	epsJ_3	ecl8_01685	0.135649	15.1355	FALSE	TRUE	FALSE
ecl8_01686	ecl8_01686	ecl8_01686	0.121834	13.4513	FALSE	TRUE	FALSE
ykoT	ykoT	ecl8_01687	0.195719	21.7544	FALSE	TRUE	FALSE
ecl8_01688	ecl8_01688	ecl8_01688	0.177249	19.8146	FALSE	TRUE	FALSE
hisI_1	hisI_1	ecl8_01689	0.175	19.5735	FALSE	TRUE	FALSE
hisF	hisF	ecl8_01690	0.0900901	9.19541	FALSE	TRUE	FALSE
hisA	hisA	ecl8_01691	0.0609756	4.4964	FALSE	TRUE	FALSE
hisH	hisH	ecl8_01692	0.106599	11.4878	FALSE	TRUE	FALSE
hisB	hisB	ecl8_01693	0.0777154	7.32541	FALSE	TRUE	FALSE
hisC	hisC	ecl8_01694	0.0875706	8.82673	FALSE	TRUE	FALSE
hisD	hisD	ecl8_01695	0.0850575	8.45319	FALSE	TRUE	FALSE
hisG	hisG	ecl8_01696	0.104444	11.1994	FALSE	TRUE	FALSE
yeeZ	yeeZ	ecl8_01697	0.089697	9.13825	FALSE	TRUE	FALSE
yhaJ_2	yhaJ_2	ecl8_01698	0.0748792	6.8736	FALSE	TRUE	FALSE
plaP	plaP	ecl8_01699	0.124356	13.7649	FALSE	TRUE	FALSE
ecl8_01700	ecl8_01700	ecl8_01700	0.102564	10.9453	FALSE	TRUE	FALSE
fusA_2	fusA_2	ecl8_01701	0.0879696	8.88548	FALSE	TRUE	FALSE
sbcB	sbcB	ecl8_01702	0.0940351	9.76178	FALSE	TRUE	FALSE
dacD	dacD	ecl8_01703	0.0833333	8.1934	FALSE	TRUE	FALSE
sbmC	sbmC	ecl8_01704	0.0843882	8.35269	FALSE	TRUE	FALSE
yeeA	yeeA	ecl8_01705	0.0906516	9.27681	FALSE	TRUE	FALSE
ecl8_01706	ecl8_01706	ecl8_01706	0.111111	12.0826	FALSE	TRUE	FALSE
cobS	cobS	ecl8_01707	0.0580297	3.95066	FALSE	TRUE	FALSE
cobT_2	cobT_2	ecl8_01708	0.0810811	7.8495	FALSE	TRUE	FALSE
cobT_3	cobT_3	ecl8_01709	0.0990991	10.4708	FALSE	TRUE	FALSE
ahcY	ahcY	ecl8_01710	0.081982	7.9877	FALSE	TRUE	FALSE
ecl8_01711	ecl8_01711	ecl8_01711	0.0833333	8.1934	FALSE	TRUE	FALSE
ecl8_01712	ecl8_01712	ecl8_01712	0.110256	11.9708	FALSE	TRUE	FALSE
dmlR_8	dmlR_8	ecl8_01713	0.0574713	3.84522	FALSE	TRUE	FALSE
ecl8_01714	ecl8_01714	ecl8_01714	0.0620783	4.69637	FALSE	TRUE	FALSE
yhjE_2	yhjE_2	ecl8_01715	0.0742424	6.7708	FALSE	TRUE	FALSE
ecl8_01716	ecl8_01716	ecl8_01716	0.0845771	8.38111	FALSE	TRUE	FALSE
ecl8_01717	ecl8_01717	ecl8_01717	0.284632	30.373	FALSE	TRUE	FALSE
ecl8_01718	ecl8_01718	ecl8_01718	0.103448	11.0651	FALSE	TRUE	FALSE
ecl8_01719	ecl8_01719	ecl8_01719	0.161074	18.0535	FALSE	TRUE	FALSE
yeaR_1	yeaR_1	ecl8_01720	0.279279	29.8791	FALSE	TRUE	FALSE
yoaG	yoaG	ecl8_01721	0.154762	17.3478	FALSE	TRUE	FALSE
gcvA_2	gcvA_2	ecl8_01722	0.0699454	6.06317	FALSE	TRUE	FALSE
ecl8_01723	ecl8_01723	ecl8_01723	0.0607639	4.45774	FALSE	TRUE	FALSE
cpo	cpo	ecl8_01724	0.0824373	8.05721	FALSE	TRUE	FALSE
dgcP_1	dgcP_1	ecl8_01725	0.0658436	5.36301	FALSE	TRUE	FALSE
ecl8_01726	ecl8_01726	ecl8_01726	0.0688406	5.87708	FALSE	TRUE	FALSE
ecl8_01727	ecl8_01727	ecl8_01727	0.109507	11.8725	FALSE	TRUE	FALSE
ecl8_01728	ecl8_01728	ecl8_01728	0.0555556	3.47841	FALSE	FALSE	TRUE
nimR_2	nimR_2	ecl8_01729	0.143742	16.0872	FALSE	TRUE	FALSE
aaeB_2	aaeB_2	ecl8_01730	0.180577	20.1693	FALSE	TRUE	FALSE
ecl8_01731	ecl8_01731	ecl8_01731	0.087963	8.88451	FALSE	TRUE	FALSE
aaeA_2	aaeA_2	ecl8_01732	0.207176	22.9255	FALSE	TRUE	FALSE
ecl8_01733	ecl8_01733	ecl8_01733	0.165862	18.5816	FALSE	TRUE	FALSE
ecl8_01734	ecl8_01734	ecl8_01734	0.161202	18.0678	FALSE	TRUE	FALSE
ecl8_01735	ecl8_01735	ecl8_01735	0.00434783	-17.8354	TRUE	FALSE	FALSE
fabG_4	fabG_4	ecl8_01736	0.137546	15.3607	FALSE	TRUE	FALSE
ecl8_01737	ecl8_01737	ecl8_01737	0.159091	17.833	FALSE	TRUE	FALSE
ecl8_01738	ecl8_01738	ecl8_01738	0.221261	24.336	FALSE	TRUE	FALSE
mdtJ_1	mdtJ_1	ecl8_01739	0.152941	17.1421	FALSE	TRUE	FALSE
ecl8_01740	ecl8_01740	ecl8_01740	0.0880713	8.90045	FALSE	TRUE	FALSE
ecl8_01741	ecl8_01741	ecl8_01741	0.103448	11.0651	FALSE	TRUE	FALSE
intA_5	intA_5	ecl8_01742	0.152088	17.0454	FALSE	TRUE	FALSE
yeeO	yeeO	ecl8_01744	0.130132	14.4725	FALSE	TRUE	FALSE
amn	amn	ecl8_01746	0.116151	12.7333	FALSE	TRUE	FALSE
pmrD	pmrD	ecl8_01747	0.223577	24.5651	FALSE	TRUE	FALSE
ecl8_01748	ecl8_01748	ecl8_01748	0.0961183	10.0558	FALSE	TRUE	FALSE
ecl8_01749	ecl8_01749	ecl8_01749	0.0814577	7.90737	FALSE	TRUE	FALSE
acuI	acuI	ecl8_01750	0.0838446	8.27074	FALSE	TRUE	FALSE
acuR	acuR	ecl8_01751	0.112057	12.2057	FALSE	TRUE	FALSE
nhaK_1	nhaK_1	ecl8_01752	0.119878	13.2059	FALSE	TRUE	FALSE
oxyR_2	oxyR_2	ecl8_01754	0.087146	8.76402	FALSE	TRUE	FALSE
cbl_2	cbl_2	ecl8_01755	0.119874	13.2054	FALSE	TRUE	FALSE
erfK	erfK	ecl8_01756	0.127389	14.1382	FALSE	TRUE	FALSE
pgrR_3	pgrR_3	ecl8_01757	0.110632	12.02	FALSE	TRUE	FALSE
mtfA	mtfA	ecl8_01759	0.126566	14.0374	FALSE	TRUE	FALSE
ompN_1	ompN_1	ecl8_01761	0.212914	23.5039	FALSE	TRUE	FALSE
yedR	yedR	ecl8_01762	0.163121	18.28	FALSE	TRUE	FALSE
yedJ	yedJ	ecl8_01763	0.114407	12.5097	FALSE	TRUE	FALSE
dcm	dcm	ecl8_01764	0.0713776	6.30181	FALSE	TRUE	FALSE
vsr	vsr	ecl8_01765	0.0702811	6.11937	FALSE	TRUE	FALSE
yedA_1	yedA_1	ecl8_01766	0.0877193	8.84864	FALSE	TRUE	FALSE
yedI	yedI	ecl8_01767	0.0953947	9.95407	FALSE	TRUE	FALSE
dgcQ	dgcQ	ecl8_01768	0.0958333	10.0158	FALSE	TRUE	FALSE
ecl8_01769	ecl8_01769	ecl8_01769	0.164444	18.4259	FALSE	TRUE	FALSE
dsrB	dsrB	ecl8_01770	0.276042	29.5791	FALSE	TRUE	FALSE
rcsA_1	rcsA_1	ecl8_01771	0.201923	22.3914	FALSE	TRUE	FALSE
ecl8_01772	ecl8_01772	ecl8_01772	0.136574	15.2454	FALSE	TRUE	FALSE
amyA	amyA	ecl8_01773	0.116263	12.7477	FALSE	TRUE	FALSE
fliY_1	fliY_1	ecl8_01774	0.105469	11.3369	FALSE	TRUE	FALSE
dcyD	dcyD	ecl8_01775	0.10233	10.9136	FALSE	TRUE	FALSE
yecS_1	yecS_1	ecl8_01776	0.109118	11.8214	FALSE	TRUE	FALSE
artM_1	artM_1	ecl8_01777	0.116866	12.8245	FALSE	TRUE	FALSE
sdiA	sdiA	ecl8_01778	0.239281	26.0995	FALSE	TRUE	FALSE
ecl8_01779	ecl8_01779	ecl8_01779	0.253333	27.4467	FALSE	TRUE	FALSE
uvrY	uvrY	ecl8_01780	0.188737	21.0292	FALSE	TRUE	FALSE
uvrC	uvrC	ecl8_01781	0.0992908	10.4973	FALSE	TRUE	FALSE
pgsA	pgsA	ecl8_01782	0.00364299	-19.123	TRUE	FALSE	FALSE
dapA_2	dapA_2	ecl8_01786	0.085034	8.44967	FALSE	TRUE	FALSE
secA_1	secA_1	ecl8_01787	0.0866966	8.69748	FALSE	TRUE	FALSE
tyrP_2	tyrP_2	ecl8_01788	0.0874891	8.8147	FALSE	TRUE	FALSE
ecl8_01789	ecl8_01789	ecl8_01789	0.15	16.8078	FALSE	TRUE	FALSE
ftnA_1	ftnA_1	ecl8_01790	0.246988	26.8412	FALSE	TRUE	FALSE
ecl8_01791	ecl8_01791	ecl8_01791	0.0876369	8.8365	FALSE	TRUE	FALSE
hsrA_2	hsrA_2	ecl8_01792	0.082807	8.11351	FALSE	TRUE	FALSE
ecl8_01793	ecl8_01793	ecl8_01793	0.0753968	6.95679	FALSE	TRUE	FALSE
yagG_1	yagG_1	ecl8_01794	0.084453	8.36244	FALSE	TRUE	FALSE
ftnA_2	ftnA_2	ecl8_01795	0.109804	11.9115	FALSE	TRUE	FALSE
araF	araF	ecl8_01796	0.0998981	10.581	FALSE	TRUE	FALSE
araG	araG	ecl8_01797	0.0745875	6.82657	FALSE	TRUE	FALSE
rbsC_1	rbsC_1	ecl8_01798	0.0764526	7.12544	FALSE	TRUE	FALSE
otsB	otsB	ecl8_01799	0.0621039	4.701	FALSE	TRUE	FALSE
otsA	otsA	ecl8_01800	0.0919298	9.46114	FALSE	TRUE	FALSE
uspC	uspC	ecl8_01801	0.0745921	6.82731	FALSE	TRUE	FALSE
yagG_2	yagG_2	ecl8_01802	0.0953283	9.9447	FALSE	TRUE	FALSE
yesR	yesR	ecl8_01803	0.0736842	6.68026	FALSE	TRUE	FALSE
argS	argS	ecl8_01804	0	-172.701	TRUE	FALSE	FALSE
yecM	yecM	ecl8_01805	0.0561404	3.59125	FALSE	FALSE	TRUE
cutC_1	cutC_1	ecl8_01806	0.0793011	7.5739	FALSE	TRUE	FALSE
cmoB	cmoB	ecl8_01807	0.0756219	6.99285	FALSE	TRUE	FALSE
cmoA	cmoA	ecl8_01808	0.061828	4.65117	FALSE	TRUE	FALSE
yecN	yecN	ecl8_01809	0.0883838	8.94635	FALSE	TRUE	FALSE
ecl8_01810	ecl8_01810	ecl8_01810	0.0915751	9.41012	FALSE	TRUE	FALSE
yecD	yecD	ecl8_01811	0.0828924	8.12649	FALSE	TRUE	FALSE
aspS	aspS	ecl8_01812	0.00335571	-19.7182	TRUE	FALSE	FALSE
nudB	nudB	ecl8_01813	0.0720721	6.41651	FALSE	TRUE	FALSE
yebC	yebC	ecl8_01814	0.0566802	3.69472	FALSE	TRUE	FALSE
ruvC	ruvC	ecl8_01815	0.0191571	-6.43969	TRUE	FALSE	FALSE
ruvA	ruvA	ecl8_01816	0.0212418	-5.57493	TRUE	FALSE	FALSE
ruvB	ruvB	ecl8_01817	0.00890208	-12.5042	TRUE	FALSE	FALSE
znuB	znuB	ecl8_01818	0.0687023	5.85366	FALSE	TRUE	FALSE
znuC	znuC	ecl8_01819	0.0783533	7.42571	FALSE	TRUE	FALSE
znuA	znuA	ecl8_01820	0.114286	12.4941	FALSE	TRUE	FALSE
mepM_1	mepM_1	ecl8_01821	0.104545	11.213	FALSE	TRUE	FALSE
lpxM	lpxM	ecl8_01822	0.0492308	2.20472	FALSE	FALSE	TRUE
pykA	pykA	ecl8_01823	0.0575191	3.85427	FALSE	TRUE	FALSE
hexR_1	hexR_1	ecl8_01824	0.0844595	8.36342	FALSE	TRUE	FALSE
zwf	zwf	ecl8_01825	0.0426829	0.762771	FALSE	FALSE	TRUE
edd	edd	ecl8_01826	0.066777	5.52462	FALSE	TRUE	FALSE
eda	eda	ecl8_01827	0.0654206	5.28931	FALSE	TRUE	FALSE
purT	purT	ecl8_01828	0.072095	6.42028	FALSE	TRUE	FALSE
ecl8_01829	ecl8_01829	ecl8_01829	0.0574713	3.84522	FALSE	TRUE	FALSE
yebE	yebE	ecl8_01830	0.0560606	3.5759	FALSE	FALSE	TRUE
ptrB	ptrB	ecl8_01831	0.0838264	8.268	FALSE	TRUE	FALSE
exoX	exoX	ecl8_01832	0.0939394	9.74819	FALSE	TRUE	FALSE
holE	holE	ecl8_01833	0.0692641	5.94862	FALSE	TRUE	FALSE
yobA	yobA	ecl8_01834	0.0906667	9.279	FALSE	TRUE	FALSE
yebZ	yebZ	ecl8_01835	0.0597701	4.27515	FALSE	TRUE	FALSE
ecl8_01836	ecl8_01836	ecl8_01836	0.0914454	9.39145	FALSE	TRUE	FALSE
ecl8_01837	ecl8_01837	ecl8_01837	0.213542	23.5668	FALSE	TRUE	FALSE
ecl8_01838	ecl8_01838	ecl8_01838	0.172107	19.2616	FALSE	TRUE	FALSE
pphA	pphA	ecl8_01839	0.116208	12.7406	FALSE	TRUE	FALSE
ecl8_01840	ecl8_01840	ecl8_01840	0.09375	9.72128	FALSE	TRUE	FALSE
yebV	yebV	ecl8_01841	0.120833	13.326	FALSE	TRUE	FALSE
rsmF	rsmF	ecl8_01842	0.0691145	5.92338	FALSE	TRUE	FALSE
ecl8_01843	ecl8_01843	ecl8_01843	0.0926348	9.56221	FALSE	TRUE	FALSE
yebS	yebS	ecl8_01844	0.110592	12.0148	FALSE	TRUE	FALSE
msrC	msrC	ecl8_01845	0.124324	13.761	FALSE	TRUE	FALSE
proQ	proQ	ecl8_01846	0.0722714	6.4493	FALSE	TRUE	FALSE
prc	prc	ecl8_01847	0.0985847	10.3997	FALSE	TRUE	FALSE
htpX	htpX	ecl8_01848	0.0836158	8.23617	FALSE	TRUE	FALSE
ribZ_2	ribZ_2	ecl8_01849	0.0765864	7.14672	FALSE	TRUE	FALSE
kdgR_2	kdgR_2	ecl8_01850	0.119949	13.2149	FALSE	TRUE	FALSE
ecl8_01851	ecl8_01851	ecl8_01851	0.129167	14.3552	FALSE	TRUE	FALSE
ecl8_01852	ecl8_01852	ecl8_01852	0.199313	22.1243	FALSE	TRUE	FALSE
cspC	cspC	ecl8_01853	0.3	31.7774	FALSE	TRUE	FALSE
ftsI_1	ftsI_1	ecl8_01854	0.0738832	6.71258	FALSE	TRUE	FALSE
rlmA	rlmA	ecl8_01855	0.0641509	5.06633	FALSE	TRUE	FALSE
mntP	mntP	ecl8_01856	0.0881834	8.91692	FALSE	TRUE	FALSE
ecl8_01857	ecl8_01857	ecl8_01857	0.137255	15.3262	FALSE	TRUE	FALSE
manZ_1	manZ_1	ecl8_01858	0.0985915	10.4006	FALSE	TRUE	FALSE
manY	manY	ecl8_01859	0.116105	12.7274	FALSE	TRUE	FALSE
manX_1	manX_1	ecl8_01860	0.0761317	7.07432	FALSE	TRUE	FALSE
ecl8_01861	ecl8_01861	ecl8_01861	0.0846154	8.38686	FALSE	TRUE	FALSE
pdeD	pdeD	ecl8_01862	0.0665399	5.4837	FALSE	TRUE	FALSE
sdaA	sdaA	ecl8_01863	0.0901099	9.19828	FALSE	TRUE	FALSE
nudL	nudL	ecl8_01864	0.0656304	5.3259	FALSE	TRUE	FALSE
pabB	pabB	ecl8_01865	0.0848083	8.41582	FALSE	TRUE	FALSE
ecl8_01866	ecl8_01866	ecl8_01866	0.102151	10.8891	FALSE	TRUE	FALSE
yabJ_1	yabJ_1	ecl8_01867	0.110145	11.9562	FALSE	TRUE	FALSE
dinG_1	dinG_1	ecl8_01868	0.0727368	6.52567	FALSE	TRUE	FALSE
tsaB	tsaB	ecl8_01869	0.00287356	-20.8382	TRUE	FALSE	FALSE
slp	slp	ecl8_01870	0.0756014	6.98957	FALSE	TRUE	FALSE
fadD	fadD	ecl8_01871	0.0744619	6.80629	FALSE	TRUE	FALSE
rnd	rnd	ecl8_01872	0.0806452	7.78233	FALSE	TRUE	FALSE
minE	minE	ecl8_01873	0.0222222	-5.1925	TRUE	FALSE	FALSE
minD	minD	ecl8_01874	0.102091	10.881	FALSE	TRUE	FALSE
minC	minC	ecl8_01875	0.13877	15.5052	FALSE	TRUE	FALSE
ycgL	ycgL	ecl8_01876	0.134752	15.0284	FALSE	TRUE	FALSE
ycgM	ycgM	ecl8_01877	0.113636	12.4104	FALSE	TRUE	FALSE
ecl8_01878	ecl8_01878	ecl8_01878	0.0872483	8.77915	FALSE	TRUE	FALSE
yeaR_2	yeaR_2	ecl8_01879	0.0811594	7.86156	FALSE	TRUE	FALSE
dsbB	dsbB	ecl8_01880	0.0903955	9.23972	FALSE	TRUE	FALSE
nhaB	nhaB	ecl8_01881	0.0722115	6.43945	FALSE	TRUE	FALSE
fadR_1	fadR_1	ecl8_01882	0.0902778	9.22265	FALSE	TRUE	FALSE
ecl8_01883	ecl8_01883	ecl8_01883	0.084801	8.41474	FALSE	TRUE	FALSE
dadA_1	dadA_1	ecl8_01884	0.0731332	6.5905	FALSE	TRUE	FALSE
dadX	dadX	ecl8_01885	0.0718954	6.3874	FALSE	TRUE	FALSE
cvrA	cvrA	ecl8_01886	0.0645905	5.14384	FALSE	TRUE	FALSE
ldcA	ldcA	ecl8_01887	0.0448087	1.24682	FALSE	FALSE	TRUE
emtA	emtA	ecl8_01888	0.0604575	4.40165	FALSE	TRUE	FALSE
fhuA_1	fhuA_1	ecl8_01889	0.0678925	5.71595	FALSE	TRUE	FALSE
treA	treA	ecl8_01890	0.0710195	6.24241	FALSE	TRUE	FALSE
ecl8_01891	ecl8_01891	ecl8_01891	0.0743056	6.78102	FALSE	TRUE	FALSE
ecl8_01892	ecl8_01892	ecl8_01892	0.0763441	7.10817	FALSE	TRUE	FALSE
ecl8_01893	ecl8_01893	ecl8_01893	0.0710784	6.2522	FALSE	TRUE	FALSE
ecl8_01894	ecl8_01894	ecl8_01894	0.0887097	8.99411	FALSE	TRUE	FALSE
ecl8_01895	ecl8_01895	ecl8_01895	0.332061	34.6502	FALSE	TRUE	FALSE
ecl8_01896	ecl8_01896	ecl8_01896	0.291188	30.9745	FALSE	TRUE	FALSE
ecl8_01897	ecl8_01897	ecl8_01897	0.0848126	8.41647	FALSE	TRUE	FALSE
ecl8_01898	ecl8_01898	ecl8_01898	0.0749064	6.87797	FALSE	TRUE	FALSE
tsaR_2	tsaR_2	ecl8_01899	0.159236	17.8492	FALSE	TRUE	FALSE
tdcB	tdcB	ecl8_01900	0.128283	14.2475	FALSE	TRUE	FALSE
tdcC	tdcC	ecl8_01901	0.115616	12.6648	FALSE	TRUE	FALSE
tdcD	tdcD	ecl8_01902	0.0653433	5.27581	FALSE	TRUE	FALSE
tdcE	tdcE	ecl8_01903	0.0518519	2.74507	FALSE	FALSE	TRUE
livJ_2	livJ_2	ecl8_01904	0.0713615	6.29915	FALSE	TRUE	FALSE
livH_2	livH_2	ecl8_01905	0.0907104	9.28532	FALSE	TRUE	FALSE
livH_3	livH_3	ecl8_01906	0.0714841	6.31944	FALSE	TRUE	FALSE
glnQ_1	glnQ_1	ecl8_01907	0.076484	7.13044	FALSE	TRUE	FALSE
livF_2	livF_2	ecl8_01908	0.0805556	7.76849	FALSE	TRUE	FALSE
yjiE	yjiE	ecl8_01909	0.181208	20.2364	FALSE	TRUE	FALSE
pckA_2	pckA_2	ecl8_01910	0.101582	10.8116	FALSE	TRUE	FALSE
bltD	bltD	ecl8_01911	0.121593	13.4212	FALSE	TRUE	FALSE
pcpR_1	pcpR_1	ecl8_01912	0.0809061	7.82257	FALSE	TRUE	FALSE
kgtP_2	kgtP_2	ecl8_01913	0.0601852	4.35164	FALSE	TRUE	FALSE
ais	ais	ecl8_01914	0.070632	6.17793	FALSE	TRUE	FALSE
cynR_3	cynR_3	ecl8_01915	0.0844444	8.36116	FALSE	TRUE	FALSE
ecl8_01916	ecl8_01916	ecl8_01916	0.120083	13.2317	FALSE	TRUE	FALSE
rluA_1	rluA_1	ecl8_01917	0.0858369	8.56968	FALSE	TRUE	FALSE
ecl8_01918	ecl8_01918	ecl8_01918	0.164815	18.4666	FALSE	TRUE	FALSE
ecl8_01919	ecl8_01919	ecl8_01919	0.112121	12.2141	FALSE	TRUE	FALSE
ecl8_01920	ecl8_01920	ecl8_01920	0.0999254	10.5848	FALSE	TRUE	FALSE
ecl8_01921	ecl8_01921	ecl8_01921	0.0917431	9.4343	FALSE	TRUE	FALSE
oprF_1	oprF_1	ecl8_01922	0.0647821	5.17751	FALSE	TRUE	FALSE
vgrG1_1	vgrG1_1	ecl8_01923	0.110731	12.0329	FALSE	TRUE	FALSE
safA	safA	ecl8_01924	0.0128205	-9.68264	TRUE	FALSE	FALSE
ecl8_01925	ecl8_01925	ecl8_01925	0.00128205	-26.6042	TRUE	FALSE	FALSE
ecl8_01926	ecl8_01926	ecl8_01926	0.0049505	-16.8846	TRUE	FALSE	FALSE
ecl8_01927	ecl8_01927	ecl8_01927	0.0842845	8.33708	FALSE	TRUE	FALSE
ecl8_01928	ecl8_01928	ecl8_01928	0.0736961	6.6822	FALSE	TRUE	FALSE
ecl8_01929	ecl8_01929	ecl8_01929	0.0601719	4.3492	FALSE	TRUE	FALSE
ecl8_01930	ecl8_01930	ecl8_01930	0.0670391	5.56975	FALSE	TRUE	FALSE
ecl8_01931	ecl8_01931	ecl8_01931	0.0855856	8.53218	FALSE	TRUE	FALSE
ecl8_01932	ecl8_01932	ecl8_01932	0.0543785	3.24895	FALSE	FALSE	TRUE
thpA_1	thpA_1	ecl8_01933	0.0557377	3.51364	FALSE	FALSE	TRUE
ecl8_01934	ecl8_01934	ecl8_01934	0.0636364	4.97518	FALSE	TRUE	FALSE
ychF	ychF	ecl8_01935	0.0769231	7.20016	FALSE	TRUE	FALSE
pth	pth	ecl8_01936	0.00683761	-14.4932	TRUE	FALSE	FALSE
ecl8_01937	ecl8_01937	ecl8_01937	0.137681	15.3767	FALSE	TRUE	FALSE
nolA	nolA	ecl8_01938	0.0744986	6.81221	FALSE	TRUE	FALSE
dauA_1	dauA_1	ecl8_01939	0.0846945	8.39874	FALSE	TRUE	FALSE
prs	prs	ecl8_01940	0	-172.701	TRUE	FALSE	FALSE
ispE	ispE	ecl8_01941	0.00117371	-27.2305	TRUE	FALSE	FALSE
lolB	lolB	ecl8_01942	0.00326797	-19.9099	TRUE	FALSE	FALSE
hemA	hemA	ecl8_01943	0	-172.701	TRUE	FALSE	FALSE
prfA	prfA	ecl8_01944	0.00277008	-21.1023	TRUE	FALSE	FALSE
prmC	prmC	ecl8_01945	0.0471143	1.75398	FALSE	FALSE	TRUE
ychQ	ychQ	ecl8_01946	0.0712468	6.28014	FALSE	TRUE	FALSE
ecl8_01947	ecl8_01947	ecl8_01947	0.0910209	9.33021	FALSE	TRUE	FALSE
kdsA	kdsA	ecl8_01948	0.00701754	-14.2989	TRUE	FALSE	FALSE
chaA	chaA	ecl8_01949	0.075386	6.95505	FALSE	TRUE	FALSE
chaB	chaB	ecl8_01950	0.0735931	6.66544	FALSE	TRUE	FALSE
chaC	chaC	ecl8_01951	0.082232	8.0259	FALSE	TRUE	FALSE
ecl8_01952	ecl8_01952	ecl8_01952	0.131687	14.6606	FALSE	TRUE	FALSE
ychN	ychN	ecl8_01953	0.0847458	8.40644	FALSE	TRUE	FALSE
nasR	nasR	ecl8_01954	0.0642978	5.09226	FALSE	TRUE	FALSE
nrtA	nrtA	ecl8_01955	0.0469372	1.71564	FALSE	FALSE	TRUE
cmpB	cmpB	ecl8_01956	0.0474576	1.82804	FALSE	FALSE	TRUE
cmpC_1	cmpC_1	ecl8_01957	0.0684411	5.80935	FALSE	TRUE	FALSE
nasD_2	nasD_2	ecl8_01958	0.0587512	4.08593	FALSE	TRUE	FALSE
nasA_1	nasA_1	ecl8_01959	0.0498634	2.33688	FALSE	FALSE	TRUE
nasA_2	nasA_2	ecl8_01960	0.04811	1.96772	FALSE	FALSE	TRUE
nasA_3	nasA_3	ecl8_01961	0.0444444	1.16503	FALSE	FALSE	TRUE
ecl8_01962	ecl8_01962	ecl8_01962	0.0701374	6.09533	FALSE	TRUE	FALSE
narL	narL	ecl8_01963	0.0675883	5.66397	FALSE	TRUE	FALSE
narX	narX	ecl8_01964	0.0775717	7.30275	FALSE	TRUE	FALSE
narK	narK	ecl8_01965	0.0827934	8.11143	FALSE	TRUE	FALSE
narG	narG	ecl8_01966	0.0638355	5.01051	FALSE	TRUE	FALSE
narH	narH	ecl8_01967	0.0488281	2.12001	FALSE	FALSE	TRUE
narJ	narJ	ecl8_01968	0.0548523	3.3417	FALSE	FALSE	TRUE
narI	narI	ecl8_01969	0.0737463	6.69036	FALSE	TRUE	FALSE
ecl8_01970	ecl8_01970	ecl8_01970	0.0590858	4.1483	FALSE	TRUE	FALSE
lrpC	lrpC	ecl8_01971	0.105856	11.3887	FALSE	TRUE	FALSE
purU	purU	ecl8_01974	0.088968	9.0319	FALSE	TRUE	FALSE
ecl8_01975	ecl8_01975	ecl8_01975	0.119826	13.1994	FALSE	TRUE	FALSE
ecl8_01976	ecl8_01976	ecl8_01976	0.0786268	7.46859	FALSE	TRUE	FALSE
rssB	rssB	ecl8_01977	0.130178	14.478	FALSE	TRUE	FALSE
galU	galU	ecl8_01978	0.143965	16.113	FALSE	TRUE	FALSE
hns_1	hns_1	ecl8_01979	0.232843	25.4744	FALSE	TRUE	FALSE
tdk	tdk	ecl8_01980	0.142045	15.8896	FALSE	TRUE	FALSE
adhE_4	adhE_4	ecl8_01981	0.0896861	9.13667	FALSE	TRUE	FALSE
ecl8_01982	ecl8_01982	ecl8_01982	0.143519	16.0612	FALSE	TRUE	FALSE
oppA_1	oppA_1	ecl8_01983	0.170642	19.103	FALSE	TRUE	FALSE
oppB	oppB	ecl8_01984	0.0977199	10.2796	FALSE	TRUE	FALSE
oppC	oppC	ecl8_01985	0.0869087	8.72892	FALSE	TRUE	FALSE
oppD_3	oppD_3	ecl8_01986	0.0996055	10.5407	FALSE	TRUE	FALSE
oppF_3	oppF_3	ecl8_01987	0.0965174	10.1118	FALSE	TRUE	FALSE
ecl8_01988	ecl8_01988	ecl8_01988	0.122302	13.5097	FALSE	TRUE	FALSE
ecl8_01989	ecl8_01989	ecl8_01989	0.106061	11.416	FALSE	TRUE	FALSE
clsA	clsA	ecl8_01990	0.104723	11.2369	FALSE	TRUE	FALSE
ecl8_01991	ecl8_01991	ecl8_01991	0.149758	16.7802	FALSE	TRUE	FALSE
yceI	yceI	ecl8_01992	0.0725309	6.49192	FALSE	TRUE	FALSE
yciI	yciI	ecl8_01993	0.141414	15.8158	FALSE	TRUE	FALSE
ecl8_01994	ecl8_01994	ecl8_01994	0.171171	19.1604	FALSE	TRUE	FALSE
ecl8_01995	ecl8_01995	ecl8_01995	0.20614	22.8206	FALSE	TRUE	FALSE
ecl8_01996	ecl8_01996	ecl8_01996	0.102151	10.8891	FALSE	TRUE	FALSE
ecl8_01997	ecl8_01997	ecl8_01997	0.19469	21.6482	FALSE	TRUE	FALSE
ecl8_01998	ecl8_01998	ecl8_01998	0.0632184	4.90081	FALSE	TRUE	FALSE
ecl8_01999	ecl8_01999	ecl8_01999	0.206612	22.8684	FALSE	TRUE	FALSE
bin3	bin3	ecl8_02000	0.206731	22.8804	FALSE	TRUE	FALSE
ecl8_02001	ecl8_02001	ecl8_02001	0.194779	21.6574	FALSE	TRUE	FALSE
ecl8_02002	ecl8_02002	ecl8_02002	0.220077	24.2186	FALSE	TRUE	FALSE
tonB	tonB	ecl8_02003	0.0671835	5.59456	FALSE	TRUE	FALSE
ecl8_02004	ecl8_02004	ecl8_02004	0.0756014	6.98957	FALSE	TRUE	FALSE
ecl8_02005	ecl8_02005	ecl8_02005	0.112281	12.2348	FALSE	TRUE	FALSE
pfkB	pfkB	ecl8_02006	0.0825295	8.07126	FALSE	TRUE	FALSE
ecl8_02007	ecl8_02007	ecl8_02007	0.252964	27.4116	FALSE	TRUE	FALSE
ecl8_02008	ecl8_02008	ecl8_02008	0.264957	28.5447	FALSE	TRUE	FALSE
thrS_1	thrS_1	ecl8_02009	0.000518403	-33.004	TRUE	FALSE	FALSE
infC	infC	ecl8_02010	0	-172.701	TRUE	FALSE	FALSE
rpmI	rpmI	ecl8_02011	0.00505051	-16.7377	TRUE	FALSE	FALSE
rplT	rplT	ecl8_02012	0	-172.701	TRUE	FALSE	FALSE
pheS	pheS	ecl8_02013	0.00101626	-28.251	TRUE	FALSE	FALSE
pheT	pheT	ecl8_02014	0.0020938	-23.1103	TRUE	FALSE	FALSE
ihfA	ihfA	ecl8_02015	0.0666667	5.50558	FALSE	TRUE	FALSE
rutC_1	rutC_1	ecl8_02016	0.0948509	9.87734	FALSE	TRUE	FALSE
dadA_2	dadA_2	ecl8_02017	0.0861244	8.6125	FALSE	TRUE	FALSE
occR_2	occR_2	ecl8_02018	0.0775956	7.30653	FALSE	TRUE	FALSE
ecl8_02019	ecl8_02019	ecl8_02019	0.0725244	6.49086	FALSE	TRUE	FALSE
btuC	btuC	ecl8_02020	0.0577508	3.89807	FALSE	TRUE	FALSE
metQ_2	metQ_2	ecl8_02021	0.0973783	10.232	FALSE	TRUE	FALSE
btuE	btuE	ecl8_02022	0.0851449	8.46629	FALSE	TRUE	FALSE
btuD	btuD	ecl8_02023	0.084	8.2942	FALSE	TRUE	FALSE
mepS_2	mepS_2	ecl8_02024	0.0731183	6.58806	FALSE	TRUE	FALSE
ecl8_02025	ecl8_02025	ecl8_02025	0.0602911	4.3711	FALSE	TRUE	FALSE
ydiE	ydiE	ecl8_02026	0.0570175	3.75907	FALSE	TRUE	FALSE
aroH	aroH	ecl8_02027	0.0735435	6.65737	FALSE	TRUE	FALSE
ppsR	ppsR	ecl8_02028	0.118705	13.0579	FALSE	TRUE	FALSE
ppsA	ppsA	ecl8_02029	0.0891131	9.05311	FALSE	TRUE	FALSE
ydiK	ydiK	ecl8_02030	0.116801	12.8163	FALSE	TRUE	FALSE
ecl8_02031	ecl8_02031	ecl8_02031	0.0739287	6.71997	FALSE	TRUE	FALSE
menI	menI	ecl8_02032	0.124088	13.7316	FALSE	TRUE	FALSE
ecl8_02033	ecl8_02033	ecl8_02033	0.168675	18.8891	FALSE	TRUE	FALSE
ecl8_02034	ecl8_02034	ecl8_02034	0.165109	18.499	FALSE	TRUE	FALSE
ecl8_02035	ecl8_02035	ecl8_02035	0.246575	26.8017	FALSE	TRUE	FALSE
ecl8_02036	ecl8_02036	ecl8_02036	0.175331	19.6091	FALSE	TRUE	FALSE
xecA1	xecA1	ecl8_02037	0.0978682	10.3003	FALSE	TRUE	FALSE
mdtH_1	mdtH_1	ecl8_02038	0.0616383	4.61684	FALSE	TRUE	FALSE
fecE	fecE	ecl8_02039	0.0629921	4.86042	FALSE	TRUE	FALSE
hmuU_2	hmuU_2	ecl8_02040	0.0655106	5.30502	FALSE	TRUE	FALSE
hmuT_2	hmuT_2	ecl8_02041	0.0720721	6.41651	FALSE	TRUE	FALSE
cysL_1	cysL_1	ecl8_02042	0.0679825	5.7313	FALSE	TRUE	FALSE
[truncated: 3,167 more rows]

## Sheet: Excluded
Excluded locus tags	product
ecl8_00091	tRNA-Sec
ecl8_00216	tRNA-Pro
ecl8_00438	16S ribosomal RNA
ecl8_00439	23S ribosomal RNA
ecl8_00440	5S ribosomal RNA
ecl8_00441	tRNA-Thr
ecl8_00442	5S ribosomal RNA
ecl8_00524	tRNA-Leu
ecl8_00529	tRNA-Met
ecl8_00629	tRNA-Met
ecl8_00707	tRNA-Phe
ecl8_00778	tRNA-Gly
ecl8_00948	tRNA-Met
ecl8_00949	tRNA-Met
ecl8_00950	tRNA-Met
ecl8_01102	tRNA-Ser
ecl8_01103	tRNA-Arg
ecl8_01104	tRNA-Arg
ecl8_01105	tRNA-Arg
ecl8_01106	tRNA-Arg
ecl8_01172	transfer-messenger RNA, SsrA
ecl8_01201	16S ribosomal RNA
ecl8_01202	tRNA-Glu
ecl8_01203	23S ribosomal RNA
ecl8_01204	5S ribosomal RNA
ecl8_01360	tRNA-Lys
ecl8_01361	tRNA-Val
ecl8_01362	tRNA-Val
ecl8_01363	tRNA-Val
ecl8_01367	tRNA-Ala
ecl8_01368	tRNA-Ala
ecl8_01385	tRNA-Arg
ecl8_01402	tRNA-Thr
ecl8_01547	tRNA-Pro
ecl8_01743	tRNA-Asn
ecl8_01745	tRNA-Asn
ecl8_01753	tRNA-Asn
ecl8_01758	tRNA-Asn
ecl8_01760	tRNA-Ser
ecl8_01783	tRNA-Gly
ecl8_01784	tRNA-Cys
ecl8_01785	tRNA-Leu
ecl8_01972	tRNA-Tyr
ecl8_01973	tRNA-Tyr
ecl8_02200	tRNA-Val
ecl8_02201	tRNA-Val
ecl8_02202	tRNA-Val
ecl8_03118	tRNA-Ser
ecl8_03124	tRNA-Ser
ecl8_03167	tRNA-Ser
ecl8_03464	tRNA-Lys
ecl8_03465	tRNA-Lys
ecl8_03466	tRNA-Lys
ecl8_03467	tRNA-Val
ecl8_03468	tRNA-Lys
ecl8_03469	tRNA-Val
ecl8_03470	tRNA-Lys
ecl8_03525	tRNA-Met
ecl8_03526	tRNA-Leu
ecl8_03527	tRNA-Gln
ecl8_03528	tRNA-Gln
ecl8_03529	tRNA-Met
ecl8_03530	tRNA-Gln
ecl8_03531	tRNA-Gln
ecl8_03786	tRNA-Arg
ecl8_03787	tRNA-Asn
ecl8_03826	tRNA-Arg
ecl8_04032	tRNA-Thr
ecl8_04084	tRNA-Asp
ecl8_04095	tRNA-Asp
ecl8_04096	5S ribosomal RNA
ecl8_04097	23S ribosomal RNA
ecl8_04098	tRNA-Ala
ecl8_04099	tRNA-Ile
ecl8_04100	16S ribosomal RNA
ecl8_04346	tRNA-Leu
ecl8_04347	tRNA-Leu
ecl8_04348	tRNA-Leu
ecl8_04431	5S ribosomal RNA
ecl8_04432	23S ribosomal RNA
ecl8_04433	tRNA-Glu
ecl8_04434	16S ribosomal RNA
ecl8_04499	tRNA-Leu
ecl8_04627	tRNA-Gly
ecl8_04628	tRNA-Gly
ecl8_04629	tRNA-Gly
ecl8_04668	tRNA-Phe
ecl8_04797	5S ribosomal RNA
ecl8_04798	23S ribosomal RNA
ecl8_04799	tRNA-Glu
ecl8_04800	16S ribosomal RNA
ecl8_04833	tRNA-Thr
ecl8_04834	tRNA-Gly
ecl8_04835	tRNA-Tyr
ecl8_04836	tRNA-Thr
ecl8_04840	5S ribosomal RNA
ecl8_04841	23S ribosomal RNA
ecl8_04842	tRNA-Ala
ecl8_04843	tRNA-Ile
ecl8_04844	16S ribosomal RNA
ecl8_04889	tRNA-Pro
ecl8_04890	tRNA-Leu
ecl8_04891	tRNA-His
ecl8_04892	tRNA-Arg
ecl8_04926	tRNA-Trp
ecl8_04927	tRNA-Asp
ecl8_04928	5S ribosomal RNA
ecl8_04929	23S ribosomal RNA
ecl8_04930	tRNA-Ala
ecl8_04931	tRNA-Ile
ecl8_04932	16S ribosomal RNA
ecl8_05026	5S ribosomal RNA
ecl8_05027	23S ribosomal RNA
ecl8_05028	tRNA-Glu
ecl8_05029	16S ribosomal RNA

## Sheet: CDS_look up table
gene_name	locus_tag	gene_name	Product	Chromsome (c)/plasmid (p)
dnaA	ecl8_00001	dnaA	Chromosomal replication initiator protein DnaA	c
dnaN	ecl8_00002	dnaN	Beta sliding clamp	c
recF_1	ecl8_00003	recF_1	DNA replication and repair protein RecF	c
gyrB	ecl8_00004	gyrB	DNA gyrase subunit B	c
yidA	ecl8_00005	yidA	Sugar phosphatase YidA	c
ecl8_00006	ecl8_00006	ecl8_00006	hypothetical protein	c
ecl8_00007	ecl8_00007	ecl8_00007	hypothetical protein	c
lutR	ecl8_00008	lutR	HTH-type transcriptional regulator LutR	c
dgoK1_1	ecl8_00009	dgoK1_1	putative 2-dehydro-3-deoxygalactonokinase DgoK1	c
dgoA_1	ecl8_00010	dgoA_1	2-dehydro-3-deoxy-6-phosphogalactonate aldolase	c
dgoD	ecl8_00011	dgoD	D-galactonate dehydratase	c
dgoT_1	ecl8_00012	dgoT_1	D-galactonate transporter	c
ecl8_00013	ecl8_00013	ecl8_00013	hypothetical protein	c
ecl8_00014	ecl8_00014	ecl8_00014	hypothetical protein	c
ibpA_1	ecl8_00015	ibpA_1	Small heat shock protein IbpA	c
ibpB	ecl8_00016	ibpB	Small heat shock protein IbpB	c
ecl8_00017	ecl8_00017	ecl8_00017	hypothetical protein	c
ecl8_00018	ecl8_00018	ecl8_00018	hypothetical protein	c
aspT_1	ecl8_00019	aspT_1	Aspartate/alanine antiporter	c
mngR_1	ecl8_00020	mngR_1	Mannosyl-D-glycerate transport/metabolism system repressor MngR	c
malP_1	ecl8_00021	malP_1	PTS system maltose-specific EIICB component	c
aglB	ecl8_00022	aglB	6-phospho-alpha-glucosidase	c
yidH	ecl8_00023	yidH	Inner membrane protein YidH	c
yidG	ecl8_00024	yidG	Inner membrane protein YidG	c
chuR_1	ecl8_00025	chuR_1	Anaerobic sulfatase-maturating enzyme	c
dsdA	ecl8_00026	dsdA	D-serine dehydratase	c
dsdX	ecl8_00027	dsdX	D-serine transporter DsdX	c
dsdC_1	ecl8_00028	dsdC_1	HTH-type transcriptional regulator DsdC	c
emrD	ecl8_00029	emrD	Multidrug resistance protein D	c
ecl8_00030	ecl8_00030	ecl8_00030	hypothetical protein	c
ecl8_00031	ecl8_00031	ecl8_00031	hypothetical protein	c
ecl8_00032	ecl8_00032	ecl8_00032	hypothetical protein	c
ecl8_00033	ecl8_00033	ecl8_00033	hypothetical protein	c
ilvB	ecl8_00034	ilvB	Acetolactate synthase isozyme 1 large subunit	c
ilvN	ecl8_00035	ilvN	Acetolactate synthase isozyme 1 small subunit	c
uhpA_1	ecl8_00036	uhpA_1	Transcriptional regulatory protein UhpA	c
uhpB	ecl8_00037	uhpB	Signal transduction histidine-protein kinase/phosphatase UhpB	c
uhpC	ecl8_00038	uhpC	Membrane sensor protein UhpC	c
uhpT	ecl8_00039	uhpT	Hexose-6-phosphate:phosphate antiporter	c
ecl8_00040	ecl8_00040	ecl8_00040	hypothetical protein	c
higA-2	ecl8_00041	higA-2	Antitoxin HigA-2	c
ecl8_00042	ecl8_00042	ecl8_00042	hypothetical protein	c
nepI_1	ecl8_00043	nepI_1	Purine ribonucleoside efflux pump NepI	c
phnX	ecl8_00044	phnX	Phosphonoacetaldehyde hydrolase	c
phnW	ecl8_00045	phnW	2-aminoethylphosphonate--pyruvate transaminase	c
phnR	ecl8_00046	phnR	Putative transcriptional regulator of 2-aminoethylphosphonate degradation operons	c
phnS	ecl8_00047	phnS	Putative 2-aminoethylphosphonate-binding periplasmic protein	c
phnT	ecl8_00048	phnT	Putative 2-aminoethylphosphonate import ATP-binding protein PhnT	c
phnU	ecl8_00049	phnU	Putative 2-aminoethylphosphonate transport system permease protein PhnU	c
phnV_1	ecl8_00050	phnV_1	Putative 2-aminoethylphosphonate transport system permease protein PhnV	c
lamB_1	ecl8_00051	lamB_1	Maltoporin	c
chbA_1	ecl8_00052	chbA_1	PTS system N,N'-diacetylchitobiose-specific EIIA component	c
licC_1	ecl8_00053	licC_1	Lichenan permease IIC component	c
celA_1	ecl8_00054	celA_1	PTS system cellobiose-specific EIIB component	c
ascG_1	ecl8_00055	ascG_1	HTH-type transcriptional regulator AscG	c
pcaK_1	ecl8_00056	pcaK_1	4-hydroxybenzoate transporter PcaK	c
galA_1	ecl8_00057	galA_1	Gallate dioxygenase	c
galA_2	ecl8_00058	galA_2	Gallate dioxygenase	c
gbpR_1	ecl8_00059	gbpR_1	HTH-type transcriptional regulator GbpR	c
galB	ecl8_00060	galB	4-oxalmesaconate hydratase	c
galC	ecl8_00061	galC	4-carboxy-4-hydroxy-2-oxoadipic acid aldolase	c
galD	ecl8_00062	galD	4-oxalomesaconate tautomerase	c
mmsB_1	ecl8_00063	mmsB_1	3-hydroxyisobutyrate dehydrogenase	c
ecl8_00064	ecl8_00064	ecl8_00064	hypothetical protein	c
yicL	ecl8_00065	yicL	putative inner membrane transporter YicL	c
murP	ecl8_00066	murP	PTS system N-acetylmuramic acid-specific EIIBC component	c
murQ_1	ecl8_00067	murQ_1	N-acetylmuramic acid 6-phosphate etherase	c
bcr_1	ecl8_00068	bcr_1	Bicyclomycin resistance protein	c
oprM_1	ecl8_00069	oprM_1	Outer membrane protein OprM	c
mexB	ecl8_00070	mexB	Multidrug resistance protein MexB	c
mexA	ecl8_00071	mexA	Multidrug resistance protein MexA	c
ecl8_00072	ecl8_00072	ecl8_00072	Acetyltransferase	c
ecl8_00073	ecl8_00073	ecl8_00073	hypothetical protein	c
luxR	ecl8_00074	luxR	HTH-type transcriptional regulator LuxR	c
bmr3	ecl8_00075	bmr3	Multidrug resistance protein 3	c
dmlR_1	ecl8_00076	dmlR_1	HTH-type transcriptional regulator DmlR	c
ecl8_00077	ecl8_00077	ecl8_00077	hypothetical protein	c
ecl8_00078	ecl8_00078	ecl8_00078	hypothetical protein	c
ecl8_00079	ecl8_00079	ecl8_00079	hypothetical protein	c
rclR_1	ecl8_00080	rclR_1	RCS-specific HTH-type transcriptional activator RclR	c
nlpA	ecl8_00081	nlpA	Lipoprotein 28	c
ecl8_00082	ecl8_00082	ecl8_00082	hypothetical protein	c
act	ecl8_00083	act	Methanol dehydrogenase activator	c
ecl8_00084	ecl8_00084	ecl8_00084	hypothetical protein	c
cdhR_1	ecl8_00085	cdhR_1	HTH-type transcriptional regulator CdhR	c
yahK	ecl8_00086	yahK	Aldehyde reductase YahK	c
ecl8_00087	ecl8_00087	ecl8_00087	hypothetical protein	c
ycnE	ecl8_00088	ycnE	Putative monooxygenase YcnE	c
ecl8_00089	ecl8_00089	ecl8_00089	Zinc-type alcohol dehydrogenase-like protein	c
ecl8_00090	ecl8_00090	ecl8_00090	hypothetical protein	c
ecl8_00091	ecl8_00091	ecl8_00091	tRNA-Sec	c
yicJ_1	ecl8_00092	yicJ_1	Inner membrane symporter YicJ	c
yicI	ecl8_00093	yicI	Alpha-xylosidase	c
glvR_1	ecl8_00094	glvR_1	HTH-type transcriptional regulator GlvR	c
bglT	ecl8_00095	bglT	6-phospho-beta-glucosidase BglT	c
malP_2	ecl8_00096	malP_2	PTS system maltose-specific EIICB component	c
ecl8_00097	ecl8_00097	ecl8_00097	hypothetical protein	c
xanP_1	ecl8_00098	xanP_1	Xanthine permease XanP	c
gltS	ecl8_00099	gltS	Sodium/glutamate symporter	c
glpK_1	ecl8_00100	glpK_1	Glycerol kinase	c
glpF_1	ecl8_00101	glpF_1	Glycerol uptake facilitator protein	c
zapB	ecl8_00102	zapB	Cell division protein ZapB	c
sbp	ecl8_00103	sbp	Sulfate-binding protein	c
cdh	ecl8_00104	cdh	CDP-diacylglycerol pyrophosphatase	c
ecl8_00105	ecl8_00105	ecl8_00105	hypothetical protein	c
tpiA	ecl8_00106	tpiA	Triosephosphate isomerase	c
ecl8_00107	ecl8_00107	ecl8_00107	hypothetical protein	c
ecl8_00108	ecl8_00108	ecl8_00108	hypothetical protein	c
fpr	ecl8_00109	fpr	Flavodoxin/ferredoxin--NADP reductase	c
glpX	ecl8_00110	glpX	Fructose-1,6-bisphosphatase 1 class 2	c
recG	ecl8_00111	recG	ATP-dependent DNA helicase RecG	c
trmH	ecl8_00112	trmH	tRNA (guanosine(18)-2'-O)-methyltransferase	c
spoT	ecl8_00113	spoT	Bifunctional (p)ppGpp synthase/hydrolase SpoT	c
rpoZ	ecl8_00114	rpoZ	DNA-directed RNA polymerase subunit omega	c
gmk	ecl8_00115	gmk	Guanylate kinase	c
ligB	ecl8_00116	ligB	DNA ligase B	c
ecl8_00117	ecl8_00117	ecl8_00117	hypothetical protein	c
clcA_1	ecl8_00118	clcA_1	H(+)/Cl(-) exchange transporter ClcA	c
ada_1	ecl8_00119	ada_1	Bifunctional transcriptional activator/DNA repair enzyme Ada	c
ecl8_00120	ecl8_00120	ecl8_00120	hypothetical protein	c
ecl8_00121	ecl8_00121	ecl8_00121	hypothetical protein	c
ecl8_00122	ecl8_00122	ecl8_00122	hypothetical protein	c
ecl8_00123	ecl8_00123	ecl8_00123	hypothetical protein	c
ybhF_1	ecl8_00124	ybhF_1	putative multidrug ABC transporter ATP-binding protein YbhF	c
ybhR_1	ecl8_00125	ybhR_1	putative multidrug ABC transporter permease YbhR	c
rph	ecl8_00126	rph	Ribonuclease PH	c
pyrE_1	ecl8_00127	pyrE_1	Orotate phosphoribosyltransferase	c
gnl	ecl8_00128	gnl	Gluconolactonase	c
slmA	ecl8_00129	slmA	Nucleoid occlusion factor SlmA	c
dut	ecl8_00130	dut	Deoxyuridine 5'-triphosphate nucleotidohydrolase	c
coaBC	ecl8_00131	coaBC	Coenzyme A biosynthesis bifunctional protein CoaBC	c
ecl8_00132	ecl8_00132	ecl8_00132	hypothetical protein	c
rpmB	ecl8_00133	rpmB	50S ribosomal protein L28	c
rpmG	ecl8_00134	rpmG	50S ribosomal protein L33	c
mutM	ecl8_00135	mutM	Formamidopyrimidine-DNA glycosylase	c
coaD	ecl8_00136	coaD	Phosphopantetheine adenylyltransferase	c
ecl8_00137	ecl8_00137	ecl8_00137	hypothetical protein	c
waaA	ecl8_00138	waaA	3-deoxy-D-manno-octulosonic acid transferase	c
epsJ_1	ecl8_00139	epsJ_1	putative glycosyltransferase EpsJ	c
pglJ	ecl8_00140	pglJ	N-acetylgalactosamine-N, N'-diacetylbacillosaminyl-diphospho-undecaprenol 4-alpha-N-acetylgalactosaminyltransferase	c
rfaG	ecl8_00141	rfaG	Lipopolysaccharide core biosynthesis protein RfaG	c
rfaQ	ecl8_00142	rfaQ	Lipopolysaccharide core heptosyltransferase RfaQ	c
ecl8_00143	ecl8_00143	ecl8_00143	hypothetical protein	c
epsJ_2	ecl8_00144	epsJ_2	putative glycosyltransferase EpsJ	c
rfaL	ecl8_00145	rfaL	O-antigen ligase	c
ecl8_00146	ecl8_00146	ecl8_00146	Glycogen synthase	c
rfaC	ecl8_00147	rfaC	Lipopolysaccharide heptosyltransferase 1	c
rfaF	ecl8_00148	rfaF	ADP-heptose--LPS heptosyltransferase 2	c
hldD	ecl8_00149	hldD	ADP-L-glycero-D-manno-heptose-6-epimerase	c
kbl	ecl8_00150	kbl	2-amino-3-ketobutyrate coenzyme A ligase	c
tdh	ecl8_00151	tdh	L-threonine 3-dehydrogenase	c
ecl8_00152	ecl8_00152	ecl8_00152	hypothetical protein	c
ecl8_00153	ecl8_00153	ecl8_00153	hypothetical protein	c
envC	ecl8_00154	envC	Murein hydrolase activator EnvC	c
gpmI	ecl8_00155	gpmI	2,3-bisphosphoglycerate-independent phosphoglycerate mutase	c
yibN	ecl8_00156	yibN	putative protein YibN	c
grxC	ecl8_00157	grxC	Glutaredoxin 3	c
secB	ecl8_00158	secB	Protein-export protein SecB	c
gpsA	ecl8_00159	gpsA	Glycerol-3-phosphate dehydrogenase [NAD(P)+]	c
cysE	ecl8_00160	cysE	Serine acetyltransferase	c
ecl8_00161	ecl8_00161	ecl8_00161	hypothetical protein	c
ecl8_00162	ecl8_00162	ecl8_00162	hypothetical protein	c
trmL	ecl8_00163	trmL	tRNA (cytidine(34)-2'-O)-methyltransferase	c
lldD_1	ecl8_00164	lldD_1	L-lactate dehydrogenase	c
lldR_1	ecl8_00165	lldR_1	Putative L-lactate dehydrogenase operon regulatory protein	c
lldP	ecl8_00166	lldP	L-lactate permease	c
yibL	ecl8_00167	yibL	putative protein YibL	c
ecl8_00168	ecl8_00168	ecl8_00168	hypothetical protein	c
mtlR	ecl8_00169	mtlR	Mannitol operon repressor	c
mtlD	ecl8_00170	mtlD	Mannitol-1-phosphate 5-dehydrogenase	c
mtlA	ecl8_00171	mtlA	PTS system mannitol-specific EIICBA component	c
yibF_1	ecl8_00172	yibF_1	putative GST-like protein YibF	c
selA	ecl8_00173	selA	L-seryl-tRNA(Sec) selenium transferase	c
selB	ecl8_00174	selB	Selenocysteine-specific elongation factor	c
cooF	ecl8_00175	cooF	Iron-sulfur protein	c
avtA	ecl8_00176	avtA	Valine--pyruvate aminotransferase	c
malS	ecl8_00177	malS	Periplasmic alpha-amylase	c
ecl8_00178	ecl8_00178	ecl8_00178	hypothetical protein	c
xylR	ecl8_00179	xylR	Xylose operon regulatory protein	c
xylH_1	ecl8_00180	xylH_1	Xylose transport system permease protein XylH	c
xylG_1	ecl8_00181	xylG_1	Xylose import ATP-binding protein XylG	c
xylF_1	ecl8_00182	xylF_1	D-xylose-binding periplasmic protein	c
xylA_1	ecl8_00183	xylA_1	Xylose isomerase	c
xylB_1	ecl8_00184	xylB_1	Xylulose kinase	c
yiaB	ecl8_00185	yiaB	Inner membrane protein YiaB	c
yiaA	ecl8_00186	yiaA	Inner membrane protein YiaA	c
wecH	ecl8_00187	wecH	O-acetyltransferase WecH	c
ecl8_00188	ecl8_00188	ecl8_00188	hypothetical protein	c
glyQ	ecl8_00189	glyQ	Glycine--tRNA ligase alpha subunit	c
glyS	ecl8_00190	glyS	Glycine--tRNA ligase beta subunit	c
ecl8_00191	ecl8_00191	ecl8_00191	hypothetical protein	c
ecl8_00192	ecl8_00192	ecl8_00192	hypothetical protein	c
ecl8_00193	ecl8_00193	ecl8_00193	hypothetical protein	c
ecl8_00194	ecl8_00194	ecl8_00194	hypothetical protein	c
ecl8_00195	ecl8_00195	ecl8_00195	hypothetical protein	c
ecl8_00196	ecl8_00196	ecl8_00196	hypothetical protein	c
hokA_1	ecl8_00197	hokA_1	Protein HokA	c
yheS_1	ecl8_00198	yheS_1	putative ABC transporter ATP-binding protein YheS	c
cspA	ecl8_00199	cspA	Cold shock protein CspA	c
ecl8_00200	ecl8_00200	ecl8_00200	hypothetical protein	c
pcaK_2	ecl8_00201	pcaK_2	4-hydroxybenzoate transporter PcaK	c
ecl8_00202	ecl8_00202	ecl8_00202	hypothetical protein	c
ghrB	ecl8_00203	ghrB	Glyoxylate/hydroxypyruvate reductase B	c
ttuB_1	ecl8_00204	ttuB_1	Putative tartrate transporter	c
kdgK_1	ecl8_00205	kdgK_1	2-dehydro-3-deoxygluconokinase	c
ecl8_00206	ecl8_00206	ecl8_00206	hypothetical protein	c
kdgR_1	ecl8_00207	kdgR_1	HTH-type transcriptional regulator KdgR	c
yiaD	ecl8_00208	yiaD	putative lipoprotein YiaD	c
bisC	ecl8_00209	bisC	Biotin sulfoxide reductase	c
yjaB_1	ecl8_00210	yjaB_1	putative N-acetyltransferase YjaB	c
tag	ecl8_00211	tag	DNA-3-methyladenine glycosylase 1	c
ecl8_00212	ecl8_00212	ecl8_00212	hypothetical protein	c
yhjX	ecl8_00213	yhjX	putative MFS-type transporter YhjX	c
eptB	ecl8_00214	eptB	Kdo(2)-lipid A phosphoethanolamine 7''-transferase	c
ecl8_00215	ecl8_00215	ecl8_00215	hypothetical protein	c
ecl8_00216	ecl8_00216	ecl8_00216	tRNA-Pro	c
ecl8_00217	ecl8_00217	ecl8_00217	hypothetical protein	c
ecl8_00218	ecl8_00218	ecl8_00218	hypothetical protein	c
dppA_1	ecl8_00219	dppA_1	Periplasmic dipeptide transport protein	c
dppB_1	ecl8_00220	dppB_1	Dipeptide transport system permease protein DppB	c
dppC	ecl8_00221	dppC	Dipeptide transport system permease protein DppC	c
dppD_1	ecl8_00222	dppD_1	Dipeptide transport ATP-binding protein DppD	c
oppF_1	ecl8_00223	oppF_1	Oligopeptide transport ATP-binding protein OppF	c
ecl8_00224	ecl8_00224	ecl8_00224	hypothetical protein	c
bcsQ_1	ecl8_00225	bcsQ_1	Cellulose biosynthesis protein BcsQ	c
acsAB	ecl8_00226	acsAB	Cellulose synthase 1	c
bcsB_1	ecl8_00227	bcsB_1	Cyclic di-GMP-binding protein	c
acsC	ecl8_00228	acsC	Cellulose synthase operon protein C	c
acsD	ecl8_00229	acsD	Cellulose synthase operon protein D	c
ecl8_00230	ecl8_00230	ecl8_00230	Endoglucanase	c
ecl8_00231	ecl8_00231	ecl8_00231	hypothetical protein	c
ecl8_00232	ecl8_00232	ecl8_00232	hypothetical protein	c
bcsE	ecl8_00233	bcsE	Cyclic di-GMP binding protein BcsE	c
yhjR	ecl8_00234	yhjR	Protein YhjR	c
bcsQ_2	ecl8_00235	bcsQ_2	Cellulose biosynthesis protein BcsQ	c
bcsA	ecl8_00236	bcsA	Cellulose synthase catalytic subunit [UDP-forming]	c
bcsB_2	ecl8_00237	bcsB_2	Cyclic di-GMP-binding protein	c
bcsZ	ecl8_00238	bcsZ	Endoglucanase	c
bcsC	ecl8_00239	bcsC	Cellulose synthase operon protein C	c
pdeK	ecl8_00240	pdeK	putative cyclic di-GMP phosphodiesterase PdeK	c
dctA_1	ecl8_00241	dctA_1	Aerobic C4-dicarboxylate transport protein	c
yhjJ	ecl8_00242	yhjJ	Protein YhjJ	c
kdgK_2	ecl8_00243	kdgK_2	2-dehydro-3-deoxygluconokinase	c
ecl8_00244	ecl8_00244	ecl8_00244	hypothetical protein	c
yhjE_1	ecl8_00245	yhjE_1	Inner membrane metabolite transport protein YhjE	c
yhjD	ecl8_00246	yhjD	Inner membrane protein YhjD	c
dmlR_2	ecl8_00247	dmlR_2	HTH-type transcriptional regulator DmlR	c
fabG_1	ecl8_00248	fabG_1	3-oxoacyl-[acyl-carrier-protein] reductase FabG	c
speG_1	ecl8_00249	speG_1	Spermidine N(1)-acetyltransferase	c
treF	ecl8_00250	treF	Cytoplasmic trehalase	c
adh1_1	ecl8_00251	adh1_1	Long-chain-alcohol dehydrogenase 1	c
gstB_1	ecl8_00252	gstB_1	Glutathione S-transferase GstB	c
gor	ecl8_00253	gor	Glutathione reductase	c
rlmJ	ecl8_00254	rlmJ	Ribosomal RNA large subunit methyltransferase J	c
phoC_1	ecl8_00255	phoC_1	Major phosphate-irrepressible acid phosphatase	c
prlC	ecl8_00256	prlC	Oligopeptidase A	c
rsmJ	ecl8_00257	rsmJ	Ribosomal RNA small subunit methyltransferase J	c
dtpB	ecl8_00258	dtpB	Dipeptide and tripeptide permease B	c
uspA_1	ecl8_00259	uspA_1	Universal stress protein A	c
uspB	ecl8_00260	uspB	Universal stress protein B	c
pitA	ecl8_00261	pitA	Low-affinity inorganic phosphate transporter 1	c
ecl8_00262	ecl8_00262	ecl8_00262	hypothetical protein	c
ecl8_00263	ecl8_00263	ecl8_00263	Magnesium transporter MgtE	c
ecl8_00264	ecl8_00264	ecl8_00264	hypothetical protein	c
nikR	ecl8_00265	nikR	Nickel-responsive regulator	c
nikE	ecl8_00266	nikE	Nickel import ATP-binding protein NikE	c
nikD	ecl8_00267	nikD	Nickel import ATP-binding protein NikD	c
nikC	ecl8_00268	nikC	Nickel transport system permease protein NikC	c
nikB	ecl8_00269	nikB	Nickel transport system permease protein NikB	c
nikA	ecl8_00270	nikA	Nickel-binding periplasmic protein	c
allS_1	ecl8_00271	allS_1	HTH-type transcriptional activator AllS	c
padC	ecl8_00272	padC	Phenolic acid decarboxylase PadC	c
arnB	ecl8_00273	arnB	UDP-4-amino-4-deoxy-L-arabinose--oxoglutarate aminotransferase	c
arnC	ecl8_00274	arnC	Undecaprenyl-phosphate 4-deoxy-4-formamido-L-arabinose transferase	c
arnA	ecl8_00275	arnA	Bifunctional polymyxin resistance protein ArnA	c
arnD	ecl8_00276	arnD	putative 4-deoxy-4-formamido-L-arabinose-phosphoundecaprenol deformylase ArnD	c
arnT	ecl8_00277	arnT	Undecaprenyl phosphate-alpha-4-amino-4-deoxy-L-arabinose arabinosyl transferase	c
arnE	ecl8_00278	arnE	putative 4-amino-4-deoxy-L-arabinose-phosphoundecaprenol flippase subunit ArnE	c
arnF	ecl8_00279	arnF	putative 4-amino-4-deoxy-L-arabinose-phosphoundecaprenol flippase subunit ArnF	c
yhhT_1	ecl8_00280	yhhT_1	Putative transport protein YhhT	c
yhhS_1	ecl8_00281	yhhS_1	putative MFS-type transporter YhhS	c
ecl8_00282	ecl8_00282	ecl8_00282	hypothetical protein	c
yhhQ	ecl8_00283	yhhQ	Queuosine precursor transporter	c
tusA	ecl8_00284	tusA	Sulfur carrier protein TusA	c
zntA	ecl8_00285	zntA	Zinc/cadmium/lead-transporting P-type ATPase	c
ecl8_00286	ecl8_00286	ecl8_00286	hypothetical protein	c
ecl8_00287	ecl8_00287	ecl8_00287	hypothetical protein	c
ecl8_00288	ecl8_00288	ecl8_00288	hypothetical protein	c
rsmD	ecl8_00289	rsmD	Ribosomal RNA small subunit methyltransferase D	c
ftsY	ecl8_00290	ftsY	Signal recognition particle receptor FtsY	c
ftsE	ecl8_00291	ftsE	Cell division ATP-binding protein FtsE	c
ftsX	ecl8_00292	ftsX	Cell division protein FtsX	c
rpoH	ecl8_00293	rpoH	RNA polymerase sigma factor RpoH	c
gabR_1	ecl8_00294	gabR_1	HTH-type transcriptional regulatory protein GabR	c
puuE	ecl8_00295	puuE	4-aminobutyrate aminotransferase PuuE	c
tyrP_1	ecl8_00296	tyrP_1	Tyrosine-specific transport protein	c
livJ_1	ecl8_00297	livJ_1	Leu/Ile/Val-binding protein	c
panM	ecl8_00298	panM	PanD regulatory factor	c
livK	ecl8_00299	livK	Leucine-specific-binding protein	c
livH_1	ecl8_00300	livH_1	High-affinity branched-chain amino acid transport system permease protein LivH	c
ecl8_00301	ecl8_00301	ecl8_00301	hypothetical protein	c
lptB_1	ecl8_00302	lptB_1	Lipopolysaccharide export system ATP-binding protein LptB	c
livF_1	ecl8_00303	livF_1	High-affinity branched-chain amino acid transport ATP-binding protein LivF	c
ugpB_1	ecl8_00304	ugpB_1	sn-glycerol-3-phosphate-binding periplasmic protein UgpB	c
ugpA_1	ecl8_00305	ugpA_1	sn-glycerol-3-phosphate transport system permease protein UgpA	c
lacG_1	ecl8_00306	lacG_1	Lactose transport system permease protein LacG	c
ugpC_1	ecl8_00307	ugpC_1	sn-glycerol-3-phosphate import ATP-binding protein UgpC	c
ugpQ	ecl8_00308	ugpQ	Glycerophosphodiester phosphodiesterase, cytoplasmic	c
yhhA	ecl8_00309	yhhA	putative protein YhhA	c
ggt	ecl8_00310	ggt	Glutathione hydrolase proenzyme	c
aaaT	ecl8_00311	aaaT	L-amino acid N-acetyltransferase AaaT	c
ecl8_00312	ecl8_00312	ecl8_00312	hypothetical protein	c
yhhX	ecl8_00313	yhhX	putative oxidoreductase YhhX	c
yhhW_1	ecl8_00314	yhhW_1	Quercetin 2,3-dioxygenase	c
gntR_1	ecl8_00315	gntR_1	HTH-type transcriptional regulator GntR	c
gntK	ecl8_00316	gntK	Thermoresistant gluconokinase	c
gntU	ecl8_00317	gntU	Low-affinity gluconate transporter	c
asd_1	ecl8_00318	asd_1	Aspartate-semialdehyde dehydrogenase	c
glgB	ecl8_00319	glgB	1,4-alpha-glucan branching enzyme GlgB	c
glgX	ecl8_00320	glgX	Glycogen debranching enzyme	c
glgC_1	ecl8_00321	glgC_1	Glucose-1-phosphate adenylyltransferase	c
glgA	ecl8_00322	glgA	Glycogen synthase	c
malP_3	ecl8_00323	malP_3	Maltodextrin phosphorylase	c
glpD	ecl8_00324	glpD	Aerobic glycerol-3-phosphate dehydrogenase	c
glpE_1	ecl8_00325	glpE_1	Thiosulfate sulfurtransferase GlpE	c
glpG	ecl8_00326	glpG	Rhomboid protease GlpG	c
glpR_1	ecl8_00327	glpR_1	Glycerol-3-phosphate regulon repressor	c
malT	ecl8_00328	malT	HTH-type transcriptional regulator MalT	c
malP_4	ecl8_00329	malP_4	Maltodextrin phosphorylase	c
malQ	ecl8_00330	malQ	4-alpha-glucanotransferase	c
gntT	ecl8_00331	gntT	High-affinity gluconate transporter	c
nfuA	ecl8_00332	nfuA	Fe/S biogenesis protein NfuA	c
pyrE_2	ecl8_00333	pyrE_2	Orotate phosphoribosyltransferase	c
bioH	ecl8_00334	bioH	Pimeloyl-[acyl-carrier protein] methyl ester esterase	c
bhsA_1	ecl8_00335	bhsA_1	Multiple stress resistance protein BhsA	c
feoC	ecl8_00336	feoC	putative [Fe-S]-dependent transcriptional repressor	c
feoB_1	ecl8_00337	feoB_1	Fe(2+) transporter FeoB	c
feoA	ecl8_00338	feoA	Fe(2+) transport protein A	c
yhgF	ecl8_00339	yhgF	Protein YhgF	c
greB	ecl8_00340	greB	Transcription elongation factor GreB	c
ompR_1	ecl8_00341	ompR_1	Transcriptional regulatory protein OmpR	c
envZ_1	ecl8_00342	envZ_1	Osmolarity sensor protein EnvZ	c
pckA_1	ecl8_00343	pckA_1	Phosphoenolpyruvate carboxykinase (ATP)	c
hslO	ecl8_00344	hslO	33 kDa chaperonin	c
hslR	ecl8_00345	hslR	Heat shock protein 15	c
yrfG	ecl8_00346	yrfG	GMP/IMP nucleotidase YrfG	c
igaA	ecl8_00347	igaA	Intracellular growth attenuator protein igaA	c
nudE	ecl8_00348	nudE	ADP compounds hydrolase NudE	c
mrcA	ecl8_00349	mrcA	Penicillin-binding protein 1A	c
ecl8_00350	ecl8_00350	ecl8_00350	hypothetical protein	c
ecl8_00351	ecl8_00351	ecl8_00351	hypothetical protein	c
ecl8_00352	ecl8_00352	ecl8_00352	hypothetical protein	c
pilQ	ecl8_00353	pilQ	Type IV pilus biogenesis and competence protein PilQ	c
aroK_1	ecl8_00354	aroK_1	Shikimate kinase 1	c
aroB	ecl8_00355	aroB	3-dehydroquinate synthase	c
damX	ecl8_00356	damX	Cell division protein DamX	c
dam_1	ecl8_00357	dam_1	DNA adenine methylase	c
rpe	ecl8_00358	rpe	Ribulose-phosphate 3-epimerase	c
gph	ecl8_00359	gph	Phosphoglycolate phosphatase	c
trpS	ecl8_00360	trpS	Tryptophan--tRNA ligase	c
cysG_1	ecl8_00361	cysG_1	Siroheme synthase	c
nirD	ecl8_00362	nirD	Nitrite reductase (NADH) small subunit	c
nasD_1	ecl8_00363	nasD_1	Nitrite reductase [NAD(P)H]	c
ecl8_00364	ecl8_00364	ecl8_00364	hypothetical protein	c
codA_1	ecl8_00365	codA_1	Cytosine deaminase	c
tsgA	ecl8_00366	tsgA	Protein TsgA	c
ppiA	ecl8_00367	ppiA	Peptidyl-prolyl cis-trans isomerase A	c
yhfG	ecl8_00368	yhfG	putative protein YhfG	c
fic	ecl8_00369	fic	putative adenosine monophosphate-protein transferase fic	c
pabA	ecl8_00370	pabA	Aminodeoxychorismate synthase component 2	c
argD	ecl8_00371	argD	Acetylornithine/succinyldiaminopimelate aminotransferase	c
yccS_1	ecl8_00372	yccS_1	Inner membrane protein YccS	c
crp	ecl8_00373	crp	cAMP-activated global transcriptional regulator CRP	c
yhfA	ecl8_00374	yhfA	Protein YhfA	c
cfxP	ecl8_00375	cfxP	Phosphoribulokinase, plasmid	c
ecl8_00376	ecl8_00376	ecl8_00376	hypothetical protein	c
ecl8_00377	ecl8_00377	ecl8_00377	hypothetical protein	c
yheS_2	ecl8_00378	yheS_2	putative ABC transporter ATP-binding protein YheS	c
ywrO_1	ecl8_00379	ywrO_1	General stress protein 14	c
kefC_1	ecl8_00380	kefC_1	Glutathione-regulated potassium-efflux system protein KefC	c
ecl8_00381	ecl8_00381	ecl8_00381	hypothetical protein	c
slyD	ecl8_00382	slyD	FKBP-type peptidyl-prolyl cis-trans isomerase SlyD	c
slyX	ecl8_00383	slyX	Protein SlyX	c
fkpA_1	ecl8_00384	fkpA_1	FKBP-type peptidyl-prolyl cis-trans isomerase FkpA	c
dauR	ecl8_00385	dauR	Transcriptional regulator DauR	c
tusD	ecl8_00386	tusD	Sulfurtransferase TusD	c
tusC	ecl8_00387	tusC	Protein TusC	c
tusB	ecl8_00388	tusB	Protein TusB	c
rpsL	ecl8_00389	rpsL	30S ribosomal protein S12	c
rpsG	ecl8_00390	rpsG	30S ribosomal protein S7	c
fusA_1	ecl8_00391	fusA_1	Elongation factor G	c
tufA_1	ecl8_00392	tufA_1	Elongation factor Tu 1	c
bfd	ecl8_00393	bfd	Bacterioferritin-associated ferredoxin	c
bfr	ecl8_00394	bfr	Bacterioferritin	c
outO_1	ecl8_00395	outO_1	Type 4 prepilin-like proteins leader peptide-processing enzyme	c
rpsJ	ecl8_00396	rpsJ	30S ribosomal protein S10	c
rplC	ecl8_00397	rplC	50S ribosomal protein L3	c
rplD	ecl8_00398	rplD	50S ribosomal protein L4	c
rplW	ecl8_00399	rplW	50S ribosomal protein L23	c
rplB	ecl8_00400	rplB	50S ribosomal protein L2	c
rpsS	ecl8_00401	rpsS	30S ribosomal protein S19	c
rplV	ecl8_00402	rplV	50S ribosomal protein L22	c
rpsC	ecl8_00403	rpsC	30S ribosomal protein S3	c
rplP	ecl8_00404	rplP	50S ribosomal protein L16	c
rpmC	ecl8_00405	rpmC	50S ribosomal protein L29	c
rpsQ	ecl8_00406	rpsQ	30S ribosomal protein S17	c
rplN	ecl8_00407	rplN	50S ribosomal protein L14	c
rplX	ecl8_00408	rplX	50S ribosomal protein L24	c
rplE	ecl8_00409	rplE	50S ribosomal protein L5	c
rpsN	ecl8_00410	rpsN	30S ribosomal protein S14	c
rpsH	ecl8_00411	rpsH	30S ribosomal protein S8	c
rplF	ecl8_00412	rplF	50S ribosomal protein L6	c
rplR	ecl8_00413	rplR	50S ribosomal protein L18	c
rpsE	ecl8_00414	rpsE	30S ribosomal protein S5	c
rpmD	ecl8_00415	rpmD	50S ribosomal protein L30	c
rplO	ecl8_00416	rplO	50S ribosomal protein L15	c
secY	ecl8_00417	secY	Protein translocase subunit SecY	c
rpsM	ecl8_00418	rpsM	30S ribosomal protein S13	c
rpsD	ecl8_00419	rpsD	30S ribosomal protein S4	c
rpoA	ecl8_00420	rpoA	DNA-directed RNA polymerase subunit alpha	c
rplQ	ecl8_00421	rplQ	50S ribosomal protein L17	c
ecl8_00422	ecl8_00422	ecl8_00422	hypothetical protein	c
zntR	ecl8_00423	zntR	HTH-type transcriptional regulator ZntR	c
ecl8_00424	ecl8_00424	ecl8_00424	hypothetical protein	c
arfA	ecl8_00425	arfA	Alternative ribosome-rescue factor A	c
mscL	ecl8_00426	mscL	Large-conductance mechanosensitive channel	c
trkA	ecl8_00427	trkA	Trk system potassium uptake protein TrkA	c
rsmB	ecl8_00428	rsmB	Ribosomal RNA small subunit methyltransferase B	c
fmt	ecl8_00429	fmt	Methionyl-tRNA formyltransferase	c
def_1	ecl8_00430	def_1	Peptide deformylase	c
dprA	ecl8_00431	dprA	DNA processing protein DprA	c
smg	ecl8_00432	smg	Protein Smg	c
topA_1	ecl8_00433	topA_1	DNA topoisomerase 1	c
tsaC	ecl8_00434	tsaC	Threonylcarbamoyl-AMP synthase	c
aroE_1	ecl8_00435	aroE_1	Shikimate dehydrogenase (NADP(+))	c
ecl8_00436	ecl8_00436	ecl8_00436	hypothetical protein	c
yrdA_1	ecl8_00437	yrdA_1	Protein YrdA	c
ecl8_00438	ecl8_00438	ecl8_00438	16S ribosomal RNA	c
ecl8_00439	ecl8_00439	ecl8_00439	23S ribosomal RNA	c
ecl8_00440	ecl8_00440	ecl8_00440	5S ribosomal RNA	c
ecl8_00441	ecl8_00441	ecl8_00441	tRNA-Thr	c
ecl8_00442	ecl8_00442	ecl8_00442	5S ribosomal RNA	c
ecl8_00443	ecl8_00443	ecl8_00443	hypothetical protein	c
acrF	ecl8_00444	acrF	Multidrug export protein AcrF	c
acrE	ecl8_00445	acrE	Multidrug export protein AcrE	c
acrR_1	ecl8_00446	acrR_1	HTH-type transcriptional regulator AcrR	c
fis	ecl8_00447	fis	DNA-binding protein Fis	c
dus	ecl8_00448	dus	putative tRNA-dihydrouridine synthase	c
prmA	ecl8_00449	prmA	Ribosomal protein L11 methyltransferase	c
panF	ecl8_00450	panF	Sodium/pantothenate symporter	c
yhdT	ecl8_00451	yhdT	putative membrane protein YhdT	c
accC_1	ecl8_00452	accC_1	Biotin carboxylase	c
accB_1	ecl8_00453	accB_1	Biotin carboxyl carrier protein of acetyl-CoA carboxylase	c
aroQ	ecl8_00454	aroQ	3-dehydroquinate dehydratase	c
msrQ	ecl8_00455	msrQ	Protein-methionine-sulfoxide reductase heme-binding subunit MsrQ	c
msrP	ecl8_00456	msrP	Protein-methionine-sulfoxide reductase catalytic subunit MsrP	c
csrD	ecl8_00457	csrD	RNase E specificity factor CsrD	c
mreB	ecl8_00458	mreB	Rod shape-determining protein MreB	c
mreC	ecl8_00459	mreC	Cell shape-determining protein MreC	c
mreD	ecl8_00460	mreD	Rod shape-determining protein MreD	c
yhdE	ecl8_00461	yhdE	Maf-like protein YhdE	c
rng	ecl8_00462	rng	Ribonuclease G	c
ecl8_00463	ecl8_00463	ecl8_00463	hypothetical protein	c
tldD	ecl8_00464	tldD	Metalloprotease TldD	c
dmlR_3	ecl8_00465	dmlR_3	HTH-type transcriptional regulator DmlR	c
aaeX	ecl8_00466	aaeX	Protein AaeX	c
aaeA_1	ecl8_00467	aaeA_1	p-hydroxybenzoic acid efflux pump subunit AaeA	c
aaeB_1	ecl8_00468	aaeB_1	p-hydroxybenzoic acid efflux pump subunit AaeB	c
yhcO	ecl8_00469	yhcO	putative protein YhcO	c
bhsA_2	ecl8_00470	bhsA_2	Multiple stress resistance protein BhsA	c
bhsA_3	ecl8_00471	bhsA_3	Multiple stress resistance protein BhsA	c
argR	ecl8_00472	argR	Arginine repressor	c
mdh_1	ecl8_00473	mdh_1	Malate dehydrogenase	c
degS	ecl8_00474	degS	Serine endoprotease DegS	c
degQ	ecl8_00475	degQ	Periplasmic pH-dependent serine endoprotease DegQ	c
yhcB	ecl8_00476	yhcB	Inner membrane protein YhcB	c
zapE_1	ecl8_00477	zapE_1	Cell division protein ZapE	c
rplM	ecl8_00478	rplM	50S ribosomal protein L13	c
rpsI	ecl8_00479	rpsI	30S ribosomal protein S9	c
sspA	ecl8_00480	sspA	Stringent starvation protein A	c
sspB	ecl8_00481	sspB	Stringent starvation protein B	c
nanE	ecl8_00482	nanE	Putative N-acetylmannosamine-6-phosphate 2-epimerase	c
gltD_1	ecl8_00483	gltD_1	Glutamate synthase [NADPH] small chain	c
gltB	ecl8_00484	gltB	Glutamate synthase [NADPH] large chain	c
rimO_1	ecl8_00485	rimO_1	Ribosomal protein S12 methylthiotransferase RimO	c
exuT_1	ecl8_00486	exuT_1	Hexuronate transporter	c
rspB	ecl8_00487	rspB	Starvation-sensing protein RspB	c
uxuA_1	ecl8_00488	uxuA_1	Mannonate dehydratase	c
arcB	ecl8_00489	arcB	Aerobic respiration control sensor protein ArcB	c
elbB	ecl8_00490	elbB	Glyoxalase ElbB	c
mtgA	ecl8_00491	mtgA	Biosynthetic peptidoglycan transglycosylase	c
ptsO	ecl8_00492	ptsO	Phosphocarrier protein NPr	c
rapZ	ecl8_00493	rapZ	RNase adapter protein RapZ	c
ptsN	ecl8_00494	ptsN	Nitrogen regulatory protein	c
hpf_1	ecl8_00495	hpf_1	Ribosome hibernation promoting factor	c
rpoN	ecl8_00496	rpoN	RNA polymerase sigma-54 factor	c
lptB_2	ecl8_00497	lptB_2	Lipopolysaccharide export system ATP-binding protein LptB	c
lptA	ecl8_00498	lptA	Lipopolysaccharide export system protein LptA	c
lptC	ecl8_00499	lptC	Lipopolysaccharide export system protein LptC	c
kdsC	ecl8_00500	kdsC	3-deoxy-D-manno-octulosonate 8-phosphate phosphatase KdsC	c
kdsD	ecl8_00501	kdsD	Arabinose 5-phosphate isomerase KdsD	c
yrbG	ecl8_00502	yrbG	Inner membrane protein YrbG	c
mlaF	ecl8_00503	mlaF	putative phospholipid import ATP-binding protein MlaF	c
mlaE	ecl8_00504	mlaE	putative phospholipid ABC transporter permease protein MlaE	c
mlaD	ecl8_00505	mlaD	putative phospholipid ABC transporter-binding protein MlaD	c
mlaC	ecl8_00506	mlaC	putative phospholipid-binding protein MlaC	c
mlaB	ecl8_00507	mlaB	putative phospholipid ABC transporter-binding protein MlaB	c
ibaG	ecl8_00508	ibaG	Acid stress protein IbaG	c
murA	ecl8_00509	murA	UDP-N-acetylglucosamine 1-carboxyvinyltransferase	c
ecl8_00510	ecl8_00510	ecl8_00510	hypothetical protein	c
ispB	ecl8_00511	ispB	Octaprenyl diphosphate synthase	c
rplU	ecl8_00512	rplU	50S ribosomal protein L21	c
rpmA	ecl8_00513	rpmA	50S ribosomal protein L27	c
yhbE	ecl8_00514	yhbE	putative inner membrane transporter YhbE	c
obgE	ecl8_00515	obgE	GTPase ObgE/CgtA	c
dacB	ecl8_00516	dacB	D-alanyl-D-alanine carboxypeptidase DacB	c
greA	ecl8_00517	greA	Transcription elongation factor GreA	c
yhbY	ecl8_00518	yhbY	RNA-binding protein YhbY	c
rlmE	ecl8_00519	rlmE	Ribosomal RNA large subunit methyltransferase E	c
ftsH_1	ecl8_00520	ftsH_1	ATP-dependent zinc metalloprotease FtsH	c
folP	ecl8_00521	folP	Dihydropteroate synthase	c
glmM	ecl8_00522	glmM	Phosphoglucosamine mutase	c
secG	ecl8_00523	secG	Protein-export membrane protein SecG	c
ecl8_00524	ecl8_00524	ecl8_00524	tRNA-Leu	c
ecl8_00525	ecl8_00525	ecl8_00525	hypothetical protein	c
ecl8_00526	ecl8_00526	ecl8_00526	hypothetical protein	c
ecl8_00527	ecl8_00527	ecl8_00527	hypothetical protein	c
argG	ecl8_00528	argG	Argininosuccinate synthase	c
ecl8_00529	ecl8_00529	ecl8_00529	tRNA-Met	c
rimP	ecl8_00530	rimP	Ribosome maturation factor RimP	c
nusA	ecl8_00531	nusA	Transcription termination/antitermination protein NusA	c
infB	ecl8_00532	infB	Translation initiation factor IF-2	c
rbfA	ecl8_00533	rbfA	30S ribosome-binding factor	c
truB	ecl8_00534	truB	tRNA pseudouridine synthase B	c
rpsO	ecl8_00535	rpsO	30S ribosomal protein S15	c
pnp	ecl8_00536	pnp	Polyribonucleotide nucleotidyltransferase	c
nlpI	ecl8_00537	nlpI	Lipoprotein NlpI	c
deaD	ecl8_00538	deaD	ATP-dependent RNA helicase DeaD	c
mtr	ecl8_00539	mtr	Tryptophan-specific transport protein	c
limB_1	ecl8_00540	limB_1	Limonene 1,2-monooxygenase	c
ecl8_00541	ecl8_00541	ecl8_00541	hypothetical protein	c
yhbU	ecl8_00542	yhbU	putative protease YhbU	c
ecl8_00543	ecl8_00543	ecl8_00543	hypothetical protein	c
ecl8_00544	ecl8_00544	ecl8_00544	hypothetical protein	c
ecl8_00545	ecl8_00545	ecl8_00545	hypothetical protein	c
ecl8_00546	ecl8_00546	ecl8_00546	hypothetical protein	c
yhbO	ecl8_00547	yhbO	Protein/nucleic acid deglycase 2	c
ecl8_00548	ecl8_00548	ecl8_00548	hypothetical protein	c
ecl8_00549	ecl8_00549	ecl8_00549	Putative two-component membrane permease complex subunit SMU_747c	c
osmY_1	ecl8_00550	osmY_1	Osmotically-inducible protein Y	c
diaA	ecl8_00551	diaA	DnaA initiator-associating protein DiaA	c
ecl8_00552	ecl8_00552	ecl8_00552	hypothetical protein	c
lpoA	ecl8_00553	lpoA	Penicillin-binding protein activator LpoA	c
rsmI	ecl8_00554	rsmI	Ribosomal RNA small subunit methyltransferase I	c
garD	ecl8_00555	garD	Galactarate dehydratase (L-threo-forming)	c
ecl8_00556	ecl8_00556	ecl8_00556	hypothetical protein	c
garP	ecl8_00557	garP	putative galactarate transporter	c
garL	ecl8_00558	garL	5-keto-4-deoxy-D-glucarate aldolase	c
garR	ecl8_00559	garR	2-hydroxy-3-oxopropionate reductase	c
garK_1	ecl8_00560	garK_1	Glycerate 2-kinase	c
ecl8_00561	ecl8_00561	ecl8_00561	hypothetical protein	c
ecl8_00562	ecl8_00562	ecl8_00562	hypothetical protein	c
ecl8_00563	ecl8_00563	ecl8_00563	hypothetical protein	c
yhaK	ecl8_00564	yhaK	Pirin-like protein YhaK	c
yhaJ_1	ecl8_00565	yhaJ_1	HTH-type transcriptional regulator YhaJ	c
yhaH	ecl8_00566	yhaH	Inner membrane protein YhaH	c
yqjG	ecl8_00567	yqjG	Glutathionyl-hydroquinone reductase YqjG	c
yqjF	ecl8_00568	yqjF	Inner membrane protein YqjF	c
ecl8_00569	ecl8_00569	ecl8_00569	hypothetical protein	c
yqjE	ecl8_00570	yqjE	Inner membrane protein YqjE	c
yqjD	ecl8_00571	yqjD	putative protein YqjD	c
yqjC	ecl8_00572	yqjC	Protein YqjC	c
mzrA	ecl8_00573	mzrA	Modulator protein MzrA	c
yqjA	ecl8_00574	yqjA	Inner membrane protein YqjA	c
lldR_2	ecl8_00575	lldR_2	Putative L-lactate dehydrogenase operon regulatory protein	c
exuT_2	ecl8_00576	exuT_2	Hexuronate transporter	c
uxaC	ecl8_00577	uxaC	Uronate isomerase	c
uxaA	ecl8_00578	uxaA	Altronate dehydratase	c
ygjV	ecl8_00579	ygjV	Inner membrane protein YgjV	c
sstT	ecl8_00580	sstT	Serine/threonine transporter SstT	c
alx	ecl8_00581	alx	Putative membrane-bound redox modulator Alx	c
iolU_1	ecl8_00582	iolU_1	scyllo-inositol 2-dehydrogenase (NADP(+)) IolU	c
ygjP	ecl8_00583	ygjP	UTP pyrophosphatase	c
sutR_1	ecl8_00584	sutR_1	HTH-type transcriptional regulator SutR	c
ecl8_00585	ecl8_00585	ecl8_00585	hypothetical protein	c
rlmG	ecl8_00586	rlmG	Ribosomal RNA large subunit methyltransferase G	c
fadH	ecl8_00587	fadH	2,4-dienoyl-CoA reductase	c
lsrK	ecl8_00588	lsrK	Autoinducer-2 kinase	c
lsrR_1	ecl8_00589	lsrR_1	Transcriptional regulator LsrR	c
lsrA	ecl8_00590	lsrA	Autoinducer 2 import ATP-binding protein LsrA	c
lsrC	ecl8_00591	lsrC	Autoinducer 2 import system permease protein LsrC	c
lsrD_1	ecl8_00592	lsrD_1	Autoinducer 2 import system permease protein LsrD	c
lsrB_1	ecl8_00593	lsrB_1	Autoinducer 2-binding protein LsrB	c
lsrF	ecl8_00594	lsrF	3-hydroxy-5-phosphonooxypentane-2,4-dione thiolase	c
lsrG	ecl8_00595	lsrG	(4S)-4-hydroxy-5-phosphonooxypentane-2,3-dione isomerase	c
ygjK	ecl8_00596	ygjK	Glucosidase YgjK	c
ecl8_00597	ecl8_00597	ecl8_00597	hypothetical protein	c
ygjI_1	ecl8_00598	ygjI_1	Inner membrane transporter YgjI	c
ygjI_2	ecl8_00599	ygjI_2	Inner membrane transporter YgjI	c
ebgC	ecl8_00600	ebgC	Evolved beta-galactosidase subunit beta	c
ebgA	ecl8_00601	ebgA	Evolved beta-galactosidase subunit alpha	c
lacR	ecl8_00602	lacR	HTH-type transcriptional regulator LacR	c
ygjH	ecl8_00603	ygjH	tRNA-binding protein YgjH	c
patA	ecl8_00604	patA	Putrescine aminotransferase	c
yqjI	ecl8_00605	yqjI	Transcriptional regulator YqjI	c
yqjH	ecl8_00606	yqjH	NADPH-dependent ferric-chelate reductase	c
dhaK_1	ecl8_00607	dhaK_1	Dihydroxyacetone kinase	c
dhaM	ecl8_00608	dhaM	Protein-lysine deacetylase	c
dhaL	ecl8_00609	dhaL	PEP-dependent dihydroxyacetone kinase, ADP-binding subunit DhaL	c
dhaK_2	ecl8_00610	dhaK_2	PEP-dependent dihydroxyacetone kinase, dihydroxyacetone-binding subunit DhaK	c
dhaD	ecl8_00611	dhaD	Glycerol dehydrogenase	c
dhaR	ecl8_00612	dhaR	PTS-dependent dihydroxyacetone kinase operon regulatory protein	c
yvqK_1	ecl8_00613	yvqK_1	Cob(I)yrinic acid a,c-diamide adenosyltransferase	c
ecl8_00614	ecl8_00614	ecl8_00614	hypothetical protein	c
dhaT	ecl8_00615	dhaT	1,3-propanediol dehydrogenase	c
ecl8_00616	ecl8_00616	ecl8_00616	hypothetical protein	c
dhaB	ecl8_00617	dhaB	Glycerol dehydratase large subunit	c
pduD_1	ecl8_00618	pduD_1	Propanediol dehydratase medium subunit	c
pduE_1	ecl8_00619	pduE_1	Propanediol dehydratase small subunit	c
ddrA_1	ecl8_00620	ddrA_1	Diol dehydratase-reactivating factor alpha subunit	c
glpF_2	ecl8_00621	glpF_2	Glycerol uptake facilitator protein	c
hdeB_1	ecl8_00622	hdeB_1	Acid stress chaperone HdeB	c
hdeD_1	ecl8_00623	hdeD_1	Protein HdeD	c
yfdX	ecl8_00624	yfdX	Protein YfdX	c
evgS_1	ecl8_00625	evgS_1	Sensor protein EvgS	c
evgA_1	ecl8_00626	evgA_1	DNA-binding transcriptional activator EvgA	c
hdeB_2	ecl8_00627	hdeB_2	Acid stress chaperone HdeB	c
ecl8_00628	ecl8_00628	ecl8_00628	hypothetical protein	c
ecl8_00629	ecl8_00629	ecl8_00629	tRNA-Met	c
mug	ecl8_00630	mug	G/U mismatch-specific DNA glycosylase	c
rpoD	ecl8_00631	rpoD	RNA polymerase sigma factor RpoD	c
dnaG	ecl8_00632	dnaG	DNA primase	c
rpsU	ecl8_00633	rpsU	30S ribosomal protein S21	c
tsaD	ecl8_00634	tsaD	tRNA N6-adenosine threonylcarbamoyltransferase	c
ecl8_00635	ecl8_00635	ecl8_00635	hypothetical protein	c
ureG_1	ecl8_00636	ureG_1	Urease accessory protein UreG	c
ureF_1	ecl8_00637	ureF_1	Urease accessory protein UreF	c
ureE_1	ecl8_00638	ureE_1	Urease accessory protein UreE	c
ureC_1	ecl8_00639	ureC_1	Urease subunit alpha	c
ureB_1	ecl8_00640	ureB_1	Urease subunit beta	c
ureA	ecl8_00641	ureA	Urease subunit gamma	c
ureD	ecl8_00642	ureD	Urease accessory protein UreD	c
plsY	ecl8_00643	plsY	putative glycerol-3-phosphate acyltransferase	c
folB	ecl8_00644	folB	Dihydroneopterin aldolase	c
uppP	ecl8_00645	uppP	Undecaprenyl-diphosphatase	c
cca	ecl8_00646	cca	Multifunctional CCA protein	c
ecl8_00647	ecl8_00647	ecl8_00647	hypothetical protein	c
ygiF	ecl8_00648	ygiF	Inorganic triphosphatase	c
glnE	ecl8_00649	glnE	Bifunctional glutamine synthetase adenylyltransferase/adenylyl-removing enzyme	c
hldE	ecl8_00650	hldE	Bifunctional protein HldE	c
glgS	ecl8_00651	glgS	Surface composition regulator	c
yqiC	ecl8_00652	yqiC	putative protein YqiC	c
ribB	ecl8_00653	ribB	3,4-dihydroxy-2-butanone 4-phosphate synthase	c
zupT	ecl8_00654	zupT	Zinc transporter ZupT	c
ygiD	ecl8_00655	ygiD	4,5-DOPA dioxygenase extradiol	c
ygiC	ecl8_00656	ygiC	Putative acid--amine ligase YgiC	c
ecl8_00657	ecl8_00657	ecl8_00657	hypothetical protein	c
tolC	ecl8_00658	tolC	Outer membrane protein TolC	c
nudF	ecl8_00659	nudF	ADP-ribose pyrophosphatase	c
ecl8_00660	ecl8_00660	ecl8_00660	hypothetical protein	c
cpdA_1	ecl8_00661	cpdA_1	3',5'-cyclic adenosine monophosphate phosphodiesterase CpdA	c
ecl8_00662	ecl8_00662	ecl8_00662	hypothetical protein	c
parE	ecl8_00663	parE	DNA topoisomerase 4 subunit B	c
ygiN	ecl8_00664	ygiN	putative quinol monooxygenase YgiN	c
mdaB	ecl8_00665	mdaB	Modulator of drug activity B	c
qseC	ecl8_00666	qseC	Sensor protein QseC	c
qseB	ecl8_00667	qseB	Transcriptional regulatory protein QseB	c
ygiW_1	ecl8_00668	ygiW_1	Protein YgiW	c
adaA_1	ecl8_00669	adaA_1	Bifunctional transcriptional activator/DNA repair enzyme AdaA	c
parC	ecl8_00670	parC	DNA topoisomerase 4 subunit A	c
plsC	ecl8_00671	plsC	1-acyl-sn-glycerol-3-phosphate acyltransferase	c
ftsP	ecl8_00672	ftsP	Cell division protein FtsP	c
rimO_2	ecl8_00673	rimO_2	Ribosomal protein S12 methylthiotransferase RimO	c
ecl8_00674	ecl8_00674	ecl8_00674	hypothetical protein	c
ecl8_00675	ecl8_00675	ecl8_00675	hypothetical protein	c
dkgA	ecl8_00676	dkgA	2,5-diketo-D-gluconic acid reductase A	c
yqhD	ecl8_00677	yqhD	Alcohol dehydrogenase YqhD	c
rclR_2	ecl8_00678	rclR_2	RCS-specific HTH-type transcriptional activator RclR	c
yghB	ecl8_00679	yghB	Inner membrane protein YghB	c
metC_1	ecl8_00680	metC_1	Cystathionine beta-lyase MetC	c
exbB	ecl8_00681	exbB	Biopolymer transport protein ExbB	c
exbD	ecl8_00682	exbD	Biopolymer transport protein ExbD	c
ecl8_00683	ecl8_00683	ecl8_00683	hypothetical protein	c
ecl8_00684	ecl8_00684	ecl8_00684	hypothetical protein	c
clcD_1	ecl8_00685	clcD_1	Carboxymethylenebutenolidase	c
ecl8_00686	ecl8_00686	ecl8_00686	hypothetical protein	c
yghU	ecl8_00687	yghU	Disulfide-bond oxidoreductase YghU	c
ecl8_00688	ecl8_00688	ecl8_00688	hypothetical protein	c
gss	ecl8_00689	gss	Bifunctional glutathionylspermidine synthetase/amidase	c
lysN_1	ecl8_00690	lysN_1	2-aminoadipate transaminase	c
ecl8_00691	ecl8_00691	ecl8_00691	hypothetical protein	c
ecl8_00692	ecl8_00692	ecl8_00692	hypothetical protein	c
ecl8_00693	ecl8_00693	ecl8_00693	hypothetical protein	c
fabG_2	ecl8_00694	fabG_2	3-oxoacyl-[acyl-carrier-protein] reductase FabG	c
dmlR_4	ecl8_00695	dmlR_4	HTH-type transcriptional regulator DmlR	c
metC_2	ecl8_00696	metC_2	Cystathionine beta-lyase	c
cbs	ecl8_00697	cbs	Putative cystathionine beta-synthase	c
ecl8_00698	ecl8_00698	ecl8_00698	hypothetical protein	c
elfD_1	ecl8_00699	elfD_1	putative fimbrial chaperone protein ElfD	c
ecl8_00700	ecl8_00700	ecl8_00700	hypothetical protein	c
ecl8_00701	ecl8_00701	ecl8_00701	hypothetical protein	c
elfD_2	ecl8_00702	elfD_2	putative fimbrial chaperone protein ElfD	c
fimC_1	ecl8_00703	fimC_1	Chaperone protein FimC	c
yraJ	ecl8_00704	yraJ	Outer membrane usher protein YraJ	c
ecl8_00705	ecl8_00705	ecl8_00705	hypothetical protein	c
intA_1	ecl8_00706	intA_1	Prophage integrase IntA	c
ecl8_00707	ecl8_00707	ecl8_00707	tRNA-Phe	c
ydfK_1	ecl8_00708	ydfK_1	putative membrane protein YdfK	c
speC	ecl8_00709	speC	Constitutive ornithine decarboxylase	c
nupG_1	ecl8_00710	nupG_1	Nucleoside permease NupG	c
nupG_2	ecl8_00711	nupG_2	Nucleoside permease NupG	c
mltC	ecl8_00712	mltC	Membrane-bound lytic murein transglycosylase C	c
yggX	ecl8_00713	yggX	putative Fe(2+)-trafficking protein	c
mutY	ecl8_00714	mutY	Adenine DNA glycosylase	c
trmB	ecl8_00715	trmB	tRNA (guanine-N(7)-)-methyltransferase	c
ecl8_00716	ecl8_00716	ecl8_00716	hypothetical protein	c
ecl8_00717	ecl8_00717	ecl8_00717	hypothetical protein	c
xylH_2	ecl8_00718	xylH_2	Xylose transport system permease protein XylH	c
frcA_1	ecl8_00719	frcA_1	Fructose import ATP-binding protein FrcA	c
xylF_2	ecl8_00720	xylF_2	D-xylose-binding periplasmic protein	c
hemN_1	ecl8_00721	hemN_1	Oxygen-independent coproporphyrinogen-III oxidase-like protein	c
rdgB	ecl8_00722	rdgB	dITP/XTP pyrophosphatase	c
ecl8_00723	ecl8_00723	ecl8_00723	hypothetical protein	c
ecl8_00724	ecl8_00724	ecl8_00724	hypothetical protein	c
yggS	ecl8_00725	yggS	Pyridoxal phosphate homeostasis protein	c
yggR	ecl8_00726	yggR	putative protein YggR	c
csgD_1	ecl8_00727	csgD_1	CsgBAC operon transcriptional regulatory protein	c
yqgF	ecl8_00728	yqgF	Putative pre-16S rRNA nuclease	c
ecl8_00729	ecl8_00729	ecl8_00729	hypothetical protein	c
gshB	ecl8_00730	gshB	Glutathione synthetase	c
rsmE	ecl8_00731	rsmE	Ribosomal RNA small subunit methyltransferase E	c
endA	ecl8_00732	endA	Endonuclease-1	c
sprT	ecl8_00733	sprT	Protein SprT	c
galP	ecl8_00734	galP	Galactose-proton symporter	c
metK	ecl8_00735	metK	S-adenosylmethionine synthase	c
speA	ecl8_00736	speA	Biosynthetic arginine decarboxylase	c
speB	ecl8_00737	speB	Agmatinase	c
loiP	ecl8_00738	loiP	Metalloprotease LoiP	c
tktA_1	ecl8_00739	tktA_1	Transketolase 1	c
epd	ecl8_00740	epd	D-erythrose-4-phosphate dehydrogenase	c
pgk	ecl8_00741	pgk	Phosphoglycerate kinase	c
fbaA_1	ecl8_00742	fbaA_1	Fructose-bisphosphate aldolase class 2	c
mscS	ecl8_00743	mscS	Small-conductance mechanosensitive channel	c
argO	ecl8_00744	argO	Arginine exporter protein ArgO	c
ecl8_00745	ecl8_00745	ecl8_00745	26 kDa periplasmic immunogenic protein	c
argP	ecl8_00746	argP	HTH-type transcriptional regulator ArgP	c
rpiA	ecl8_00747	rpiA	Ribose-5-phosphate isomerase A	c
serA	ecl8_00748	serA	D-3-phosphoglycerate dehydrogenase	c
ygfA	ecl8_00749	ygfA	5-formyltetrahydrofolate cyclo-ligase	c
zapA	ecl8_00750	zapA	Cell division protein ZapA	c
ecl8_00751	ecl8_00751	ecl8_00751	hypothetical protein	c
pepP	ecl8_00752	pepP	Xaa-Pro aminopeptidase	c
ubiH	ecl8_00753	ubiH	2-octaprenyl-6-methoxyphenol hydroxylase	c
ubiI	ecl8_00754	ubiI	2-octaprenylphenol hydroxylase	c
gcvT	ecl8_00755	gcvT	Aminomethyltransferase	c
gcvH	ecl8_00756	gcvH	Glycine cleavage system H protein	c
gcvP	ecl8_00757	gcvP	Glycine dehydrogenase (decarboxylating)	c
ygfF	ecl8_00758	ygfF	putative oxidoreductase YgfF	c
msrAB	ecl8_00759	msrAB	Peptide methionine sulfoxide reductase MsrA/MsrB	c
bdbD	ecl8_00760	bdbD	Disulfide bond formation protein D	c
dsbD_1	ecl8_00761	dsbD_1	Thiol:disulfide interchange protein DsbD	c
ecl8_00762	ecl8_00762	ecl8_00762	hypothetical protein	c
bglA_1	ecl8_00763	bglA_1	6-phospho-beta-glucosidase BglA	c
glvR_2	ecl8_00764	glvR_2	HTH-type transcriptional regulator GlvR	c
ecl8_00765	ecl8_00765	ecl8_00765	hypothetical protein	c
ecl8_00766	ecl8_00766	ecl8_00766	hypothetical protein	c
ygfZ	ecl8_00767	ygfZ	tRNA-modifying protein YgfZ	c
sdhE	ecl8_00768	sdhE	FAD assembly factor SdhE	c
ygfX	ecl8_00769	ygfX	Inner membrane protein YgfX	c
fldB	ecl8_00770	fldB	Flavodoxin 2	c
xerD_1	ecl8_00771	xerD_1	Tyrosine recombinase XerD	c
dsbC	ecl8_00772	dsbC	Thiol:disulfide interchange protein DsbC	c
recJ	ecl8_00773	recJ	Single-stranded-DNA-specific exonuclease RecJ	c
prfB	ecl8_00774	prfB	Peptide chain release factor RF2	c
lysS	ecl8_00775	lysS	Lysine--tRNA ligase	c
idi	ecl8_00776	idi	Isopentenyl-diphosphate Delta-isomerase	c
nlpD_1	ecl8_00777	nlpD_1	Murein hydrolase activator NlpD	c
ecl8_00778	ecl8_00778	ecl8_00778	tRNA-Gly	c
ribZ_1	ecl8_00779	ribZ_1	Riboflavin transporter RibZ	c
nodD2_1	ecl8_00780	nodD2_1	Nodulation protein D 2	c
ecl8_00781	ecl8_00781	ecl8_00781	hypothetical protein	c
evgA_2	ecl8_00782	evgA_2	DNA-binding transcriptional activator EvgA	c
ecl8_00783	ecl8_00783	ecl8_00783	hypothetical protein	c
evgS_2	ecl8_00784	evgS_2	Sensor protein EvgS	c
evgA_3	ecl8_00785	evgA_3	DNA-binding transcriptional activator EvgA	c
lpfC'	ecl8_00786	lpfC'	putative outer membrane usher protein LpfC'	c
esiB	ecl8_00787	esiB	Secretory immunoglobulin A-binding protein EsiB	c
hdeA	ecl8_00788	hdeA	Acid stress chaperone HdeA	c
ecl8_00789	ecl8_00789	ecl8_00789	hypothetical protein	c
yejF_1	ecl8_00790	yejF_1	putative ABC transporter ATP-binding protein YejF	c
oppD_1	ecl8_00791	oppD_1	Oligopeptide transport ATP-binding protein OppD	c
ddpC_1	ecl8_00792	ddpC_1	putative D,D-dipeptide transport system permease protein DdpC	c
gsiC_1	ecl8_00793	gsiC_1	Glutathione transport system permease protein GsiC	c
appA_1	ecl8_00794	appA_1	Oligopeptide-binding protein AppA	c
ecl8_00795	ecl8_00795	ecl8_00795	Urea transporter	c
ureH	ecl8_00796	ureH	Urease accessory protein UreH	c
ureG_2	ecl8_00797	ureG_2	Urease accessory protein UreG	c
ureF_2	ecl8_00798	ureF_2	Urease accessory protein UreF	c
ureE_2	ecl8_00799	ureE_2	Urease accessory protein UreE	c
ureC_2	ecl8_00800	ureC_2	Urease subunit alpha	c
ureB_2	ecl8_00801	ureB_2	Urease subunit beta	c
ureA2	ecl8_00802	ureA2	Urease subunit gamma 2	c
amt	ecl8_00803	amt	Ammonia channel	c
hdeB_3	ecl8_00804	hdeB_3	Acid stress chaperone HdeB	c
hdeD_2	ecl8_00805	hdeD_2	Protein HdeD	c
emrY	ecl8_00806	emrY	putative multidrug resistance protein EmrY	c
emrK_1	ecl8_00807	emrK_1	putative multidrug resistance protein EmrK	c
evgA_4	ecl8_00808	evgA_4	DNA-binding transcriptional activator EvgA	c
evgS_3	ecl8_00809	evgS_3	Sensor protein EvgS	c
crcB_1	ecl8_00810	crcB_1	Putative fluoride ion transporter CrcB	c
crcB_2	ecl8_00811	crcB_2	Putative fluoride ion transporter CrcB	c
ecl8_00812	ecl8_00812	ecl8_00812	hypothetical protein	c
ecl8_00813	ecl8_00813	ecl8_00813	hypothetical protein	c
pdeG_1	ecl8_00814	pdeG_1	putative cyclic di-GMP phosphodiesterase PdeG	c
ecl8_00815	ecl8_00815	ecl8_00815	hypothetical protein	c
ecl8_00816	ecl8_00816	ecl8_00816	hypothetical protein	c
iolS_1	ecl8_00817	iolS_1	Aldo-keto reductase IolS	c
kefF_1	ecl8_00818	kefF_1	Glutathione-regulated potassium-efflux system ancillary protein KefF	c
ecl8_00819	ecl8_00819	ecl8_00819	hypothetical protein	c
pgrR_1	ecl8_00820	pgrR_1	HTH-type transcriptional regulator PgrR	c
ecl8_00821	ecl8_00821	ecl8_00821	hypothetical protein	c
ecl8_00822	ecl8_00822	ecl8_00822	hypothetical protein	c
arsR2	ecl8_00823	arsR2	Arsenic resistance transcriptional regulator ArsR2	c
arsB	ecl8_00824	arsB	Arsenical pump membrane protein	c
arsC	ecl8_00825	arsC	Arsenate reductase	c
dtpT	ecl8_00826	dtpT	Di-/tripeptide transporter	c
ecl8_00827	ecl8_00827	ecl8_00827	hypothetical protein	c
cusC_1	ecl8_00828	cusC_1	Cation efflux system protein CusC	c
mdtO	ecl8_00829	mdtO	Multidrug resistance protein MdtO	c
mdtN_1	ecl8_00830	mdtN_1	Multidrug resistance protein MdtN	c
ecl8_00831	ecl8_00831	ecl8_00831	hypothetical protein	c
ecl8_00832	ecl8_00832	ecl8_00832	hypothetical protein	c
yjdJ	ecl8_00833	yjdJ	putative protein YjdJ	c
ecl8_00834	ecl8_00834	ecl8_00834	putative signaling protein	c
fimH	ecl8_00835	fimH	Type 1 fimbrin D-mannose specific adhesin	c
fimG	ecl8_00836	fimG	Protein FimG	c
fimF_1	ecl8_00837	fimF_1	Protein FimF	c
fimD_1	ecl8_00838	fimD_1	Outer membrane usher protein FimD	c
fimC_2	ecl8_00839	fimC_2	Chaperone protein FimC	c
lpfA	ecl8_00840	lpfA	putative major fimbrial subunit LpfA	c
fim_1	ecl8_00841	fim_1	Fimbrial subunit type 1	c
xerD_2	ecl8_00842	xerD_2	Tyrosine recombinase XerD	c
xerC_1	ecl8_00843	xerC_1	Tyrosine recombinase XerC	c
ecl8_00844	ecl8_00844	ecl8_00844	hypothetical protein	c
marR_1	ecl8_00845	marR_1	Multiple antibiotic resistance protein MarR	c
ecl8_00846	ecl8_00846	ecl8_00846	hypothetical protein	c
ecl8_00847	ecl8_00847	ecl8_00847	hypothetical protein	c
ecl8_00848	ecl8_00848	ecl8_00848	hypothetical protein	c
yadV_1	ecl8_00849	yadV_1	putative fimbrial chaperone YadV	c
htrE_1	ecl8_00850	htrE_1	Outer membrane usher protein HtrE	c
mrkD_1	ecl8_00851	mrkD_1	Fimbria adhesin protein	c
ecl8_00852	ecl8_00852	ecl8_00852	hypothetical protein	c
pdeH_1	ecl8_00853	pdeH_1	Cyclic di-GMP phosphodiesterase PdeH	c
uhpA_2	ecl8_00854	uhpA_2	Transcriptional regulatory protein UhpA	c
ycgR	ecl8_00855	ycgR	Flagellar brake protein YcgR	c
pdxI	ecl8_00856	pdxI	Pyridoxine 4-dehydrogenase	c
yqeG	ecl8_00857	yqeG	Inner membrane transport protein YqeG	c
ecl8_00858	ecl8_00858	ecl8_00858	hypothetical protein	c
gltC_1	ecl8_00859	gltC_1	HTH-type transcriptional regulator GltC	c
thlA_1	ecl8_00860	thlA_1	Acetyl-CoA acetyltransferase	c
kdgM	ecl8_00861	kdgM	Oligogalacturonate-specific porin KdgM	c
ogl	ecl8_00862	ogl	Oligogalacturonate lyase	c
kduD_1	ecl8_00863	kduD_1	2-dehydro-3-deoxy-D-gluconate 5-dehydrogenase	c
araE	ecl8_00864	araE	Arabinose-proton symporter	c
cytR_1	ecl8_00865	cytR_1	HTH-type transcriptional repressor CytR	c
cscB	ecl8_00866	cscB	Sucrose permease	c
sacA	ecl8_00867	sacA	Sucrose-6-phosphate hydrolase	c
ecl8_00868	ecl8_00868	ecl8_00868	hypothetical protein	c
yesO	ecl8_00869	yesO	Putative ABC transporter substrate-binding protein YesO	c
sugC	ecl8_00870	sugC	Trehalose import ATP-binding protein SugC	c
araQ	ecl8_00871	araQ	L-arabinose transport system permease protein AraQ	c
lacF	ecl8_00872	lacF	Lactose transport system permease protein LacF	c
ecl8_00873	ecl8_00873	ecl8_00873	hypothetical protein	c
ygeA	ecl8_00874	ygeA	Putative racemase YgeA	c
occR_1	ecl8_00875	occR_1	Octopine catabolism/uptake operon regulatory protein OccR	c
lysA	ecl8_00876	lysA	Diaminopimelate decarboxylase	c
ascG_2	ecl8_00877	ascG_2	HTH-type transcriptional regulator AscG	c
licC_2	ecl8_00878	licC_2	Lichenan permease IIC component	c
gmuD_1	ecl8_00879	gmuD_1	6-phospho-beta-glucosidase GmuD	c
lldR_3	ecl8_00880	lldR_3	Putative L-lactate dehydrogenase operon regulatory protein	c
ecl8_00881	ecl8_00881	ecl8_00881	hypothetical protein	c
galR_1	ecl8_00882	galR_1	HTH-type transcriptional regulator GalR	c
aas	ecl8_00883	aas	Bifunctional protein Aas	c
lplT	ecl8_00884	lplT	Lysophospholipid transporter LplT	c
tas_1	ecl8_00885	tas_1	Protein tas	c
ygdR_1	ecl8_00886	ygdR_1	putative lipoprotein YgdR	c
ecl8_00887	ecl8_00887	ecl8_00887	hypothetical protein	c
mutH	ecl8_00888	mutH	DNA mismatch repair protein MutH	c
rppH	ecl8_00889	rppH	RNA pyrophosphohydrolase	c
ptsP	ecl8_00890	ptsP	Phosphoenolpyruvate-dependent phosphotransferase system	c
lgt	ecl8_00891	lgt	Prolipoprotein diacylglyceryl transferase	c
thyA	ecl8_00892	thyA	Thymidylate synthase	c
ecl8_00893	ecl8_00893	ecl8_00893	hypothetical protein	c
ecl8_00894	ecl8_00894	ecl8_00894	hypothetical protein	c
ecl8_00895	ecl8_00895	ecl8_00895	hypothetical protein	c
ecl8_00896	ecl8_00896	ecl8_00896	hypothetical protein	c
recC	ecl8_00897	recC	RecBCD enzyme subunit RecC	c
ptrA_1	ecl8_00898	ptrA_1	Protease 3	c
recB	ecl8_00899	recB	RecBCD enzyme subunit RecB	c
recD_1	ecl8_00900	recD_1	RecBCD enzyme subunit RecD	c
recD_2	ecl8_00901	recD_2	RecBCD enzyme subunit RecD	c
ecl8_00902	ecl8_00902	ecl8_00902	hypothetical protein	c
argA	ecl8_00903	argA	Amino-acid acetyltransferase	c
amiC_1	ecl8_00904	amiC_1	N-acetylmuramoyl-L-alanine amidase AmiC	c
cobD_1	ecl8_00905	cobD_1	Threonine-phosphate decarboxylase	c
pduX	ecl8_00906	pduX	L-threonine kinase	c
pduW	ecl8_00907	pduW	putative propionate kinase	c
pduV_1	ecl8_00908	pduV_1	Propanediol utilization protein PduV	c
pduU	ecl8_00909	pduU	Propanediol utilization protein PduU	c
ccmK	ecl8_00910	ccmK	Carbon dioxide-concentrating mechanism protein CcmK	c
rnfC	ecl8_00911	rnfC	Electron transport complex subunit RnfC	c
adhE_1	ecl8_00912	adhE_1	Aldehyde-alcohol dehydrogenase	c
adhE_2	ecl8_00913	adhE_2	Aldehyde-alcohol dehydrogenase	c
yvqK_2	ecl8_00914	yvqK_2	Cob(I)yrinic acid a,c-diamide adenosyltransferase	c
ccmL	ecl8_00915	ccmL	Carbon dioxide concentrating mechanism protein CcmL	c
ecl8_00916	ecl8_00916	ecl8_00916	hypothetical protein	c
pduL	ecl8_00917	pduL	Phosphate propanoyltransferase	c
ccmK2	ecl8_00918	ccmK2	Carbon dioxide-concentrating mechanism protein CcmK	c
pduA_1	ecl8_00919	pduA_1	Propanediol utilization protein PduA	c
ecl8_00920	ecl8_00920	ecl8_00920	hypothetical protein	c
ddrA_2	ecl8_00921	ddrA_2	Diol dehydratase-reactivating factor alpha subunit	c
pduE_2	ecl8_00922	pduE_2	Propanediol dehydratase small subunit	c
pduD_2	ecl8_00923	pduD_2	Propanediol dehydratase medium subunit	c
pduC	ecl8_00924	pduC	Propanediol dehydratase large subunit	c
pduB	ecl8_00925	pduB	Propanediol utilization protein PduB	c
pduA_2	ecl8_00926	pduA_2	Propanediol utilization protein PduA	c
pduF	ecl8_00927	pduF	Propanediol diffusion facilitator	c
araC_1	ecl8_00928	araC_1	Arabinose operon regulatory protein	c
cbiA	ecl8_00929	cbiA	Cobyrinate a,c-diamide synthase	c
cobD_2	ecl8_00930	cobD_2	Cobalamin biosynthesis protein CobD	c
cbiC	ecl8_00931	cbiC	Cobalt-precorrin-8 methylmutase	c
cbiD	ecl8_00932	cbiD	Cobalt-precorrin-5B C(1)-methyltransferase	c
cbiE	ecl8_00933	cbiE	Cobalt-precorrin-7 C(5)-methyltransferase	c
cbiT	ecl8_00934	cbiT	Cobalt-precorrin-6B C(15)-methyltransferase (decarboxylating)	c
cbiF	ecl8_00935	cbiF	Cobalt-precorrin-4 C(11)-methyltransferase	c
cbiG	ecl8_00936	cbiG	Cobalt-precorrin-5A hydrolase	c
cbiH	ecl8_00937	cbiH	putative cobalt-factor III C(17)-methyltransferase	c
cbiJ	ecl8_00938	cbiJ	Cobalt-precorrin-6A reductase	c
cbiK	ecl8_00939	cbiK	Sirohydrochlorin cobaltochelatase	c
cbiL	ecl8_00940	cbiL	Cobalt-precorrin-2 C(20)-methyltransferase	c
cbiM	ecl8_00941	cbiM	Cobalt transport protein CbiM	c
cbiN	ecl8_00942	cbiN	Cobalt transport protein CbiN	c
cbiQ	ecl8_00943	cbiQ	Cobalt transport protein CbiQ	c
cbiO_1	ecl8_00944	cbiO_1	Cobalt import ATP-binding protein CbiO	c
cobQ	ecl8_00945	cobQ	Cobyric acid synthase	c
cobU	ecl8_00946	cobU	Bifunctional adenosylcobalamin biosynthesis protein CobU	c
cobT_1	ecl8_00947	cobT_1	Nicotinate-nucleotide--dimethylbenzimidazole phosphoribosyltransferase	c
ecl8_00948	ecl8_00948	ecl8_00948	tRNA-Met	c
ecl8_00949	ecl8_00949	ecl8_00949	tRNA-Met	c
ecl8_00950	ecl8_00950	ecl8_00950	tRNA-Met	c
mltA	ecl8_00951	mltA	Membrane-bound lytic murein transglycosylase A	c
tcdA	ecl8_00952	tcdA	tRNA threonylcarbamoyladenosine dehydratase	c
csdE	ecl8_00953	csdE	Sulfur acceptor protein CsdE	c
csdA	ecl8_00954	csdA	Cysteine desulfurase CsdA	c
ygdR_2	ecl8_00955	ygdR_2	putative lipoprotein YgdR	c
gcvA_1	ecl8_00956	gcvA_1	Glycine cleavage system transcriptional activator	c
ecl8_00957	ecl8_00957	ecl8_00957	hypothetical protein	c
rlmM	ecl8_00958	rlmM	Ribosomal RNA large subunit methyltransferase M	c
ydjF	ecl8_00959	ydjF	putative HTH-type transcriptional regulator YdjF	c
fucU	ecl8_00960	fucU	L-fucose mutarotase	c
fucK	ecl8_00961	fucK	L-fuculokinase	c
fucI	ecl8_00962	fucI	L-fucose isomerase	c
fucP	ecl8_00963	fucP	L-fucose-proton symporter	c
fucA	ecl8_00964	fucA	L-fuculose phosphate aldolase	c
fucO	ecl8_00965	fucO	Lactaldehyde reductase	c
ygdG	ecl8_00966	ygdG	Flap endonuclease Xni	c
zraR_1	ecl8_00967	zraR_1	Transcriptional regulatory protein ZraR	c
msuD_1	ecl8_00968	msuD_1	Methanesulfonate monooxygenase	c
ecl8_00969	ecl8_00969	ecl8_00969	hypothetical protein	c
dmoA	ecl8_00970	dmoA	Dimethyl-sulfide monooxygenase	c
metN_1	ecl8_00971	metN_1	Methionine import ATP-binding protein MetN	c
metI_1	ecl8_00972	metI_1	D-methionine transport system permease protein MetI	c
metQ_1	ecl8_00973	metQ_1	D-methionine-binding lipoprotein MetQ	c
ygcS	ecl8_00974	ygcS	Inner membrane metabolite transport protein YgcS	c
soxC	ecl8_00975	soxC	Dibenzothiophene desulfurization enzyme C	c
ssuA_1	ecl8_00976	ssuA_1	Putative aliphatic sulfonates-binding protein	c
sdaB	ecl8_00977	sdaB	L-serine dehydratase 2	c
sdaC_1	ecl8_00978	sdaC_1	Serine transporter	c
ppnN	ecl8_00979	ppnN	Pyrimidine/purine nucleotide 5'-monophosphate nucleosidase	c
queF	ecl8_00980	queF	NADPH-dependent 7-cyano-7-deazaguanine reductase	c
syd	ecl8_00981	syd	Protein Syd	c
yqcC	ecl8_00982	yqcC	putative protein YqcC	c
truC	ecl8_00983	truC	tRNA pseudouridine synthase C	c
ecl8_00984	ecl8_00984	ecl8_00984	hypothetical protein	c
gudP_1	ecl8_00985	gudP_1	putative glucarate transporter	c
gudX	ecl8_00986	gudX	Glucarate dehydratase-related protein	c
gudD	ecl8_00987	gudD	Glucarate dehydratase	c
garK_2	ecl8_00988	garK_2	Glycerate 2-kinase	c
barA_1	ecl8_00989	barA_1	Signal transduction histidine-protein kinase BarA	c
barA_2	ecl8_00990	barA_2	Signal transduction histidine-protein kinase BarA	c
rlmD	ecl8_00991	rlmD	23S rRNA (uracil(1939)-C(5))-methyltransferase RlmD	c
relA	ecl8_00992	relA	GTP pyrophosphokinase	c
mazG	ecl8_00993	mazG	Nucleoside triphosphate pyrophosphohydrolase	c
pyrG_1	ecl8_00994	pyrG_1	CTP synthase	c
eno	ecl8_00995	eno	Enolase	c
lgrD	ecl8_00996	lgrD	Linear gramicidin synthase subunit D	c
queE	ecl8_00997	queE	7-carboxy-7-deazaguanine synthase	c
queD	ecl8_00998	queD	6-carboxy-5,6,7,8-tetrahydropterin synthase	c
cysJ	ecl8_00999	cysJ	Sulfite reductase [NADPH] flavoprotein alpha-component	c
cysI	ecl8_01000	cysI	Sulfite reductase [NADPH] hemoprotein beta-component	c
cysH_1	ecl8_01001	cysH_1	Phosphoadenosine phosphosulfate reductase	c
ywaD	ecl8_01002	ywaD	Aminopeptidase YwaD	c
cysG_2	ecl8_01003	cysG_2	Siroheme synthase	c
cysD	ecl8_01004	cysD	Sulfate adenylyltransferase subunit 2	c
cysN	ecl8_01005	cysN	Sulfate adenylyltransferase subunit 1	c
cysC	ecl8_01006	cysC	Adenylyl-sulfate kinase	c
ygbE	ecl8_01007	ygbE	Inner membrane protein YgbE	c
ftsB	ecl8_01008	ftsB	Cell division protein FtsB	c
ispD	ecl8_01009	ispD	2-C-methyl-D-erythritol 4-phosphate cytidylyltransferase	c
ispF	ecl8_01010	ispF	2-C-methyl-D-erythritol 2,4-cyclodiphosphate synthase	c
truD	ecl8_01011	truD	tRNA pseudouridine synthase D	c
surE	ecl8_01012	surE	5'/3'-nucleotidase SurE	c
pcm	ecl8_01013	pcm	Protein-L-isoaspartate O-methyltransferase	c
nlpD_2	ecl8_01014	nlpD_2	Murein hydrolase activator NlpD	c
rpoS	ecl8_01015	rpoS	RNA polymerase sigma factor RpoS	c
ecl8_01016	ecl8_01016	ecl8_01016	hypothetical protein	c
hsrA_1	ecl8_01017	hsrA_1	putative transport protein HsrA	c
dmlR_5	ecl8_01018	dmlR_5	HTH-type transcriptional regulator DmlR	c
hosA	ecl8_01019	hosA	Transcriptional regulator HosA	c
ecdB	ecl8_01020	ecdB	putative UbiX-like flavin prenyltransferase	c
edcC	ecl8_01021	edcC	Phenolic acid decarboxylase subunit C	c
bsdD	ecl8_01022	bsdD	Phenolic acid decarboxylase subunit D	c
hokA_2	ecl8_01023	hokA_2	Protein HokA	c
mutS	ecl8_01024	mutS	DNA mismatch repair protein MutS	c
intA_2	ecl8_01025	intA_2	Prophage integrase IntA	c
xerC_2	ecl8_01026	xerC_2	Tyrosine recombinase XerC	c
ecl8_01027	ecl8_01027	ecl8_01027	hypothetical protein	c
ecl8_01028	ecl8_01028	ecl8_01028	hypothetical protein	c
ecl8_01029	ecl8_01029	ecl8_01029	hypothetical protein	c
ecl8_01030	ecl8_01030	ecl8_01030	hypothetical protein	c
ecl8_01031	ecl8_01031	ecl8_01031	hypothetical protein	c
ecl8_01032	ecl8_01032	ecl8_01032	hypothetical protein	c
ecl8_01033	ecl8_01033	ecl8_01033	hypothetical protein	c
ecl8_01034	ecl8_01034	ecl8_01034	hypothetical protein	c
ftsH_2	ecl8_01035	ftsH_2	ATP-dependent zinc metalloprotease FtsH	c
ecl8_01036	ecl8_01036	ecl8_01036	hypothetical protein	c
ecl8_01037	ecl8_01037	ecl8_01037	Adenosine monophosphate-protein transferase NmFic	c
hmuV_1	ecl8_01038	hmuV_1	Hemin import ATP-binding protein HmuV	c
hmuU_1	ecl8_01039	hmuU_1	Hemin transport system permease protein HmuU	c
hmuT_1	ecl8_01040	hmuT_1	Hemin-binding periplasmic protein HmuT	c
hemS	ecl8_01041	hemS	Hemin transport protein HemS	c
ecl8_01042	ecl8_01042	ecl8_01042	putative hemoglobin and hemoglobin-haptoglobin-binding protein 2	c
ecl8_01043	ecl8_01043	ecl8_01043	hypothetical protein	c
ilvI_1	ecl8_01044	ilvI_1	Acetolactate synthase isozyme 3 large subunit	c
ecl8_01045	ecl8_01045	ecl8_01045	hypothetical protein	c
tsaR_1	ecl8_01046	tsaR_1	HTH-type transcriptional regulator TsaR	c
ecl8_01047	ecl8_01047	ecl8_01047	hypothetical protein	c
mntB_1	ecl8_01048	mntB_1	Manganese transport system membrane protein MntB	c
mntB_2	ecl8_01049	mntB_2	Manganese transport system membrane protein MntB	c
fhuC_1	ecl8_01050	fhuC_1	Iron(3+)-hydroxamate import ATP-binding protein FhuC	c
hpf_2	ecl8_01051	hpf_2	Putative metal ABC transporter substrate-binding protein Hpf	c
galR_2	ecl8_01052	galR_2	HTH-type transcriptional regulator GalR	c
mak_1	ecl8_01053	mak_1	Fructokinase	c
chbA_2	ecl8_01054	chbA_2	PTS system N,N'-diacetylchitobiose-specific EIIA component	c
licC_3	ecl8_01055	licC_3	Lichenan permease IIC component	c
gmuB	ecl8_01056	gmuB	PTS system oligo-beta-mannoside-specific EIIB component	c
licC_4	ecl8_01057	licC_4	Lichenan permease IIC component	c
scrY_1	ecl8_01058	scrY_1	Sucrose porin	c
ecl8_01059	ecl8_01059	ecl8_01059	hypothetical protein	c
gmuD_2	ecl8_01060	gmuD_2	6-phospho-beta-glucosidase GmuD	c
fhlA	ecl8_01061	fhlA	Formate hydrogenlyase transcriptional activator	c
hypE	ecl8_01062	hypE	Carbamoyl dehydratase HypE	c
hypD	ecl8_01063	hypD	Hydrogenase maturation factor HypD	c
hypC	ecl8_01064	hypC	Hydrogenase maturation factor HypC	c
hypB	ecl8_01065	hypB	Hydrogenase maturation factor HypB	c
hypA	ecl8_01066	hypA	Hydrogenase maturation factor HypA	c
hycA	ecl8_01067	hycA	Formate hydrogenlyase regulatory protein HycA	c
hyfA_1	ecl8_01068	hyfA_1	Hydrogenase-4 component A	c
hyfB	ecl8_01069	hyfB	Hydrogenase-4 component B	c
hycD	ecl8_01070	hycD	Formate hydrogenlyase subunit 4	c
hycE	ecl8_01071	hycE	Formate hydrogenlyase subunit 5	c
nuoI_1	ecl8_01072	nuoI_1	NADH-quinone oxidoreductase subunit I	c
hycG	ecl8_01073	hycG	Formate hydrogenlyase subunit 7	c
ecl8_01074	ecl8_01074	ecl8_01074	hypothetical protein	c
hycI	ecl8_01075	hycI	Hydrogenase 3 maturation protease	c
symE	ecl8_01076	symE	Toxic protein SymE	c
bglH_1	ecl8_01077	bglH_1	Aryl-phospho-beta-D-glucosidase BglH	c
bglF_1	ecl8_01078	bglF_1	PTS system beta-glucoside-specific EIIBCA component	c
ascG_3	ecl8_01079	ascG_3	HTH-type transcriptional regulator AscG	c
hyfA_2	ecl8_01080	hyfA_2	Hydrogenase-4 component A	c
hypF	ecl8_01081	hypF	Carbamoyltransferase HypF	c
hoxN	ecl8_01082	hoxN	High-affinity nickel transport protein	c
norW	ecl8_01083	norW	Nitric oxide reductase FlRd-NAD(+) reductase	c
norV	ecl8_01084	norV	Anaerobic nitric oxide reductase flavorubredoxin	c
norR	ecl8_01085	norR	Anaerobic nitric oxide reductase transcription regulator NorR	c
gutQ	ecl8_01086	gutQ	Arabinose 5-phosphate isomerase GutQ	c
srlR_1	ecl8_01087	srlR_1	Glucitol operon repressor	c
ecl8_01088	ecl8_01088	ecl8_01088	hypothetical protein	c
srlD	ecl8_01089	srlD	Sorbitol-6-phosphate 2-dehydrogenase	c
srlB_1	ecl8_01090	srlB_1	PTS system glucitol/sorbitol-specific EIIA component	c
srlE	ecl8_01091	srlE	PTS system glucitol/sorbitol-specific EIIB component	c
srlA	ecl8_01092	srlA	PTS system glucitol/sorbitol-specific EIIC component	c
mltB	ecl8_01093	mltB	Membrane-bound lytic murein transglycosylase B	c
fepC_1	ecl8_01094	fepC_1	Ferric enterobactin transport ATP-binding protein FepC	c
mntB_3	ecl8_01095	mntB_3	Manganese transport system membrane protein MntB	c
mntA	ecl8_01096	mntA	Manganese-binding lipoprotein MntA	c
pncC_1	ecl8_01097	pncC_1	Nicotinamide-nucleotide amidohydrolase PncC	c
recA	ecl8_01098	recA	Protein RecA	c
recX	ecl8_01099	recX	Regulatory protein RecX	c
alaS	ecl8_01100	alaS	Alanine--tRNA ligase	c
csrA	ecl8_01101	csrA	Carbon storage regulator	c
ecl8_01102	ecl8_01102	ecl8_01102	tRNA-Ser	c
ecl8_01103	ecl8_01103	ecl8_01103	tRNA-Arg	c
ecl8_01104	ecl8_01104	ecl8_01104	tRNA-Arg	c
ecl8_01105	ecl8_01105	ecl8_01105	tRNA-Arg	c
ecl8_01106	ecl8_01106	ecl8_01106	tRNA-Arg	c
osmY_2	ecl8_01107	osmY_2	Osmotically-inducible protein Y	c
yqaB	ecl8_01108	yqaB	Fructose-1-phosphate phosphatase YqaB	c
yqaA	ecl8_01109	yqaA	Inner membrane protein YqaA	c
gshA	ecl8_01110	gshA	Glutamate--cysteine ligase	c
luxS	ecl8_01111	luxS	S-ribosylhomocysteine lyase	c
nimR_1	ecl8_01112	nimR_1	HTH-type transcriptional regulator NimR	c
leuA_1	ecl8_01113	leuA_1	2-isopropylmalate synthase	c
emrB_1	ecl8_01114	emrB_1	Multidrug export protein EmrB	c
emrA_1	ecl8_01115	emrA_1	Multidrug export protein EmrA	c
mprA	ecl8_01116	mprA	Transcriptional repressor MprA	c
ecl8_01117	ecl8_01117	ecl8_01117	hypothetical protein	c
ygaZ_1	ecl8_01118	ygaZ_1	Inner membrane protein YgaZ	c
proX	ecl8_01119	proX	Glycine betaine/proline betaine-binding periplasmic protein	c
proW	ecl8_01120	proW	Glycine betaine/proline betaine transport system permease protein ProW	c
proV	ecl8_01121	proV	Glycine betaine/proline betaine transport system ATP-binding protein ProV	c
nrdF	ecl8_01122	nrdF	Ribonucleoside-diphosphate reductase 2 subunit beta	c
nrdE	ecl8_01123	nrdE	Ribonucleoside-diphosphate reductase 2 subunit alpha	c
nrdI	ecl8_01124	nrdI	Protein NrdI	c
nrdH	ecl8_01125	nrdH	Glutaredoxin-like protein NrdH	c
ahpD_1	ecl8_01126	ahpD_1	Alkyl hydroperoxide reductase AhpD	c
gabR_2	ecl8_01127	gabR_2	HTH-type transcriptional regulatory protein GabR	c
ygaM	ecl8_01128	ygaM	putative protein YgaM	c
ecl8_01129	ecl8_01129	ecl8_01129	hypothetical protein	c
alaE	ecl8_01130	alaE	L-alanine exporter AlaE	c
stpA	ecl8_01131	stpA	DNA-binding protein StpA	c
ecl8_01132	ecl8_01132	ecl8_01132	hypothetical protein	c
ecl8_01133	ecl8_01133	ecl8_01133	hypothetical protein	c
ygaP	ecl8_01134	ygaP	Inner membrane protein YgaP	c
ygaV	ecl8_01135	ygaV	putative HTH-type transcriptional regulator YgaV	c
azoR_1	ecl8_01136	azoR_1	FMN-dependent NADH-azoreductase	c
dmlR_6	ecl8_01137	dmlR_6	HTH-type transcriptional regulator DmlR	c
acoR_1	ecl8_01138	acoR_1	Acetoin catabolism regulatory protein	c
acoR_2	ecl8_01139	acoR_2	Acetoin dehydrogenase operon transcriptional activator AcoR	c
ald1	ecl8_01140	ald1	Long-chain-aldehyde dehydrogenase	c
fimA_1	ecl8_01141	fimA_1	Type-1 fimbrial protein, A chain	c
yraI_1	ecl8_01142	yraI_1	putative fimbrial chaperone YraI	c
fimD_2	ecl8_01143	fimD_2	Outer membrane usher protein FimD	c
ecl8_01144	ecl8_01144	ecl8_01144	hypothetical protein	c
lpfB_1	ecl8_01145	lpfB_1	putative fimbrial chaperone LpfB	c
fim_2	ecl8_01146	fim_2	Fimbrial subunit type 1	c
pheC	ecl8_01147	pheC	Cyclohexadienyl dehydratase	c
ecl8_01148	ecl8_01148	ecl8_01148	hypothetical protein	c
fabG_3	ecl8_01149	fabG_3	3-oxoacyl-[acyl-carrier-protein] reductase FabG	c
ghrA_1	ecl8_01150	ghrA_1	Glyoxylate/hydroxypyruvate reductase A	c
cloR	ecl8_01151	cloR	4-hydroxy-3-prenylphenylpyruvate oxygenase/4-hydroxy-3-prenylbenzoate synthase	c
tcyC	ecl8_01152	tcyC	L-cystine import ATP-binding protein TcyC	c
artJ_1	ecl8_01153	artJ_1	ABC transporter arginine-binding protein 1	c
efe_1	ecl8_01154	efe_1	2-oxoglutarate-dependent ethylene/succinate-forming enzyme	c
ecl8_01155	ecl8_01155	ecl8_01155	hypothetical protein	c
gbuA	ecl8_01156	gbuA	Guanidinobutyrase	c
cbl_1	ecl8_01157	cbl_1	HTH-type transcriptional regulator cbl	c
nsrR_1	ecl8_01158	nsrR_1	HTH-type transcriptional repressor NsrR	c
bepE_1	ecl8_01159	bepE_1	Efflux pump membrane transporter BepE	c
bepF	ecl8_01160	bepF	Efflux pump periplasmic linker BepF	c
rob_1	ecl8_01161	rob_1	Right origin-binding protein	c
ecl8_01162	ecl8_01162	ecl8_01162	hypothetical protein	c
pgrR_2	ecl8_01163	pgrR_2	HTH-type transcriptional regulator PgrR	c
ecl8_01164	ecl8_01164	ecl8_01164	hypothetical protein	c
ecl8_01165	ecl8_01165	ecl8_01165	hypothetical protein	c
ecl8_01166	ecl8_01166	ecl8_01166	hypothetical protein	c
ecl8_01167	ecl8_01167	ecl8_01167	hypothetical protein	c
ecl8_01168	ecl8_01168	ecl8_01168	hypothetical protein	c
ecl8_01169	ecl8_01169	ecl8_01169	hypothetical protein	c
intA_3	ecl8_01170	intA_3	Prophage integrase IntA	c
ecl8_01171	ecl8_01171	ecl8_01171	hypothetical protein	c
ssrA	ecl8_01172	ssrA	transfer-messenger RNA, SsrA	c
smpB	ecl8_01173	smpB	SsrA-binding protein	c
ratA	ecl8_01174	ratA	Ribosome association toxin RatA	c
ecl8_01175	ecl8_01175	ecl8_01175	hypothetical protein	c
bamE_1	ecl8_01176	bamE_1	Outer membrane protein assembly factor BamE	c
recN	ecl8_01177	recN	DNA repair protein RecN	c
nadK	ecl8_01178	nadK	NAD kinase	c
grpE	ecl8_01179	grpE	Protein GrpE	c
ecl8_01180	ecl8_01180	ecl8_01180	hypothetical protein	c
ypjD	ecl8_01181	ypjD	Inner membrane protein YpjD	c
ffh	ecl8_01182	ffh	Signal recognition particle protein	c
rpsP	ecl8_01183	rpsP	30S ribosomal protein S16	c
rimM	ecl8_01184	rimM	Ribosome maturation factor RimM	c
trmD	ecl8_01185	trmD	tRNA (guanine-N(1)-)-methyltransferase	c
rplS	ecl8_01186	rplS	50S ribosomal protein L19	c
ecl8_01187	ecl8_01187	ecl8_01187	hypothetical protein	c
ecl8_01188	ecl8_01188	ecl8_01188	hypothetical protein	c
ecl8_01189	ecl8_01189	ecl8_01189	Outer membrane protein Omp38	c
dgcN	ecl8_01190	dgcN	Diguanylate cyclase DgcN	c
ecl8_01191	ecl8_01191	ecl8_01191	hypothetical protein	c
aroF	ecl8_01192	aroF	Phospho-2-dehydro-3-deoxyheptonate aldolase, Tyr-sensitive	c
tyrA	ecl8_01193	tyrA	T-protein	c
ecl8_01194	ecl8_01194	ecl8_01194	6-deoxy-6-sulfogluconolactonase	c
pheA	ecl8_01195	pheA	P-protein	c
raiA	ecl8_01196	raiA	Ribosome-associated inhibitor A	c
bamD	ecl8_01197	bamD	Outer membrane protein assembly factor BamD	c
rluD	ecl8_01198	rluD	Ribosomal large subunit pseudouridine synthase D	c
yfiH	ecl8_01199	yfiH	Polyphenol oxidase	c
clpB	ecl8_01200	clpB	Chaperone protein ClpB	c
ecl8_01201	ecl8_01201	ecl8_01201	16S ribosomal RNA	c
ecl8_01202	ecl8_01202	ecl8_01202	tRNA-Glu	c
ecl8_01203	ecl8_01203	ecl8_01203	23S ribosomal RNA	c
ecl8_01204	ecl8_01204	ecl8_01204	5S ribosomal RNA	c
kgtP_1	ecl8_01205	kgtP_1	Alpha-ketoglutarate permease	c
ecl8_01206	ecl8_01206	ecl8_01206	hypothetical protein	c
pssA	ecl8_01207	pssA	CDP-diacylglycerol--serine O-phosphatidyltransferase	c
pat_1	ecl8_01208	pat_1	Protein lysine acetyltransferase Pat	c
ecl8_01209	ecl8_01209	ecl8_01209	hypothetical protein	c
trxC	ecl8_01210	trxC	Thioredoxin 2	c
yfiF	ecl8_01211	yfiF	putative tRNA/rRNA methyltransferase YfiF	c
ung	ecl8_01212	ung	Uracil-DNA glycosylase	c
grcA	ecl8_01213	grcA	Autonomous glycyl radical cofactor	c
srmB	ecl8_01214	srmB	ATP-dependent RNA helicase SrmB	c
yfiC	ecl8_01215	yfiC	tRNA1(Val) (adenine(37)-N6)-methyltransferase	c
nadB	ecl8_01216	nadB	L-aspartate oxidase	c
rpoE	ecl8_01217	rpoE	ECF RNA polymerase sigma-E factor	c
rseA	ecl8_01218	rseA	Anti-sigma-E factor RseA	c
rseB	ecl8_01219	rseB	Sigma-E factor regulatory protein RseB	c
rseC	ecl8_01220	rseC	Protein RseC	c
lepA	ecl8_01221	lepA	Elongation factor 4	c
lepB	ecl8_01222	lepB	Signal peptidase I	c
rnc	ecl8_01223	rnc	Ribonuclease 3	c
era	ecl8_01224	era	GTPase Era	c
recO	ecl8_01225	recO	DNA repair protein RecO	c
pdxJ	ecl8_01226	pdxJ	Pyridoxine 5'-phosphate synthase	c
acpS	ecl8_01227	acpS	Holo-[acyl-carrier-protein] synthase	c
yfhL	ecl8_01228	yfhL	Ferredoxin YfhL	c
murR	ecl8_01229	murR	HTH-type transcriptional regulator MurR	c
pgpC	ecl8_01230	pgpC	Phosphatidylglycerophosphatase C	c
tadA	ecl8_01231	tadA	tRNA-specific adenosine deaminase	c
mltF_1	ecl8_01232	mltF_1	Membrane-bound lytic murein transglycosylase F	c
purL	ecl8_01233	purL	Phosphoribosylformylglycinamidine synthase	c
glrK	ecl8_01234	glrK	Sensor histidine kinase GlrK	c
qseG	ecl8_01235	qseG	Quorum-sensing regulator protein G	c
glrR	ecl8_01236	glrR	Transcriptional regulatory protein GlrR	c
glnB	ecl8_01237	glnB	Nitrogen regulatory protein P-II	c
hmp	ecl8_01238	hmp	Flavohemoprotein	c
glyA1	ecl8_01239	glyA1	Serine hydroxymethyltransferase 1	c
yphA_1	ecl8_01240	yphA_1	Inner membrane protein YphA	c
yphA_2	ecl8_01241	yphA_2	Inner membrane protein YphA	c
nagC_1	ecl8_01242	nagC_1	N-acetylglucosamine repressor	c
lapB_1	ecl8_01243	lapB_1	Lipopolysaccharide assembly protein B	c
xylE	ecl8_01244	xylE	D-xylose-proton symporter	c
yphB	ecl8_01245	yphB	putative protein YphB	c
hcaT	ecl8_01246	hcaT	putative 3-phenylpropionic acid transporter	c
ecl8_01247	ecl8_01247	ecl8_01247	hypothetical protein	c
ecl8_01248	ecl8_01248	ecl8_01248	hypothetical protein	c
ecl8_01249	ecl8_01249	ecl8_01249	hypothetical protein	c
ecl8_01250	ecl8_01250	ecl8_01250	hypothetical protein	c
suhB_1	ecl8_01251	suhB_1	Inositol-1-monophosphatase	c
trmJ	ecl8_01252	trmJ	tRNA (cytidine/uridine-2'-O-)-methyltransferase TrmJ	c
iscR	ecl8_01253	iscR	HTH-type transcriptional regulator IscR	c
iscS	ecl8_01254	iscS	Cysteine desulfurase IscS	c
iscU	ecl8_01255	iscU	Iron-sulfur cluster assembly scaffold protein IscU	c
iscA	ecl8_01256	iscA	Iron-binding protein IscA	c
hscB	ecl8_01257	hscB	Co-chaperone protein HscB	c
hscA	ecl8_01258	hscA	Chaperone protein HscA	c
fdx	ecl8_01259	fdx	2Fe-2S ferredoxin	c
iscX	ecl8_01260	iscX	Protein IscX	c
pepB	ecl8_01261	pepB	Peptidase B	c
ecl8_01262	ecl8_01262	ecl8_01262	hypothetical protein	c
ecl8_01263	ecl8_01263	ecl8_01263	hypothetical protein	c
ecl8_01264	ecl8_01264	ecl8_01264	hypothetical protein	c
sseA	ecl8_01265	sseA	3-mercaptopyruvate sulfurtransferase	c
yfhM	ecl8_01266	yfhM	putative lipoprotein YfhM	c
pbpC	ecl8_01267	pbpC	Penicillin-binding protein 1C	c
ndk	ecl8_01268	ndk	Nucleoside diphosphate kinase	c
rlmN	ecl8_01269	rlmN	Dual-specificity RNA methyltransferase RlmN	c
rodZ	ecl8_01270	rodZ	Cytoskeleton protein RodZ	c
ispG	ecl8_01271	ispG	4-hydroxy-3-methylbut-2-en-1-yl diphosphate synthase (flavodoxin)	c
hisS	ecl8_01272	hisS	Histidine--tRNA ligase	c
ecl8_01273	ecl8_01273	ecl8_01273	hypothetical protein	c
bamB	ecl8_01274	bamB	Outer membrane protein assembly factor BamB	c
der	ecl8_01275	der	GTPase Der	c
ecl8_01276	ecl8_01276	ecl8_01276	hypothetical protein	c
yfgJ	ecl8_01277	yfgJ	putative protein YfgJ	c
xseA	ecl8_01278	xseA	Exodeoxyribonuclease 7 large subunit	c
guaB	ecl8_01279	guaB	Inosine-5'-monophosphate dehydrogenase	c
guaA	ecl8_01280	guaA	GMP synthase [glutamine-hydrolyzing]	c
betC	ecl8_01281	betC	Choline-sulfatase	c
chuR_2	ecl8_01282	chuR_2	Anaerobic sulfatase-maturating enzyme	c
ecl8_01283	ecl8_01283	ecl8_01283	hypothetical protein	c
yofA_1	ecl8_01284	yofA_1	HTH-type transcriptional regulator YofA	c
ecl8_01285	ecl8_01285	ecl8_01285	hypothetical protein	c
pdeF	ecl8_01286	pdeF	Cyclic di-GMP phosphodiesterase PdeF	c
ppx	ecl8_01287	ppx	Exopolyphosphatase	c
ppk	ecl8_01288	ppk	Polyphosphate kinase	c
purN	ecl8_01289	purN	Phosphoribosylglycinamide formyltransferase	c
purM	ecl8_01290	purM	Phosphoribosylformylglycinamidine cyclo-ligase	c
bglK	ecl8_01291	bglK	Beta-glucoside kinase	c
bglA_2	ecl8_01292	bglA_2	6-phospho-beta-glucosidase BglA	c
upp	ecl8_01293	upp	Uracil phosphoribosyltransferase	c
uraA	ecl8_01294	uraA	Uracil permease	c
hda	ecl8_01295	hda	DnaA regulatory inactivator Hda	c
rpnA_1	ecl8_01296	rpnA_1	Recombination-promoting nuclease RpnA	c
yfgD	ecl8_01297	yfgD	putative protein YfgD	c
bepA	ecl8_01298	bepA	Beta-barrel assembly-enhancing protease	c
yhhT_2	ecl8_01299	yhhT_2	Putative transport protein YhhT	c
bcp	ecl8_01300	bcp	Peroxiredoxin Bcp	c
gcvR	ecl8_01301	gcvR	Glycine cleavage system transcriptional repressor	c
dapA_1	ecl8_01302	dapA_1	4-hydroxy-tetrahydrodipicolinate synthase	c
bamC	ecl8_01303	bamC	Outer membrane protein assembly factor BamC	c
purC	ecl8_01304	purC	Phosphoribosylaminoimidazole-succinocarboxamide synthase	c
ecl8_01305	ecl8_01305	ecl8_01305	hypothetical protein	c
tmcA	ecl8_01306	tmcA	tRNA(Met) cytidine acetyltransferase TmcA	c
ecl8_01307	ecl8_01307	ecl8_01307	hypothetical protein	c
ecl8_01308	ecl8_01308	ecl8_01308	hypothetical protein	c
dapE	ecl8_01309	dapE	Succinyl-diaminopimelate desuccinylase	c
yffB	ecl8_01310	yffB	Protein YffB	c
acrB_1	ecl8_01311	acrB_1	Multidrug efflux pump subunit AcrB	c
gltD_2	ecl8_01312	gltD_2	Glutamate synthase [NADPH] small chain	c
nudK_1	ecl8_01313	nudK_1	GDP-mannose pyrophosphatase NudK	c
ecl8_01314	ecl8_01314	ecl8_01314	hypothetical protein	c
tktB	ecl8_01315	tktB	Transketolase 2	c
tal	ecl8_01316	tal	Transaldolase	c
maeB	ecl8_01317	maeB	NADP-dependent malic enzyme	c
eutS	ecl8_01318	eutS	Ethanolamine utilization protein EutS	c
pduV_2	ecl8_01319	pduV_2	Propanediol utilization protein PduV	c
eutQ	ecl8_01320	eutQ	Ethanolamine utilization protein EutQ	c
ecl8_01321	ecl8_01321	ecl8_01321	hypothetical protein	c
eutD	ecl8_01322	eutD	Ethanolamine utilization protein EutD	c
eutM	ecl8_01323	eutM	Ethanolamine utilization protein EutM	c
eutN	ecl8_01324	eutN	Ethanolamine utilization protein EutN	c
adhE_3	ecl8_01325	adhE_3	Aldehyde-alcohol dehydrogenase	c
ftsA_1	ecl8_01326	ftsA_1	Cell division protein FtsA	c
mdh_2	ecl8_01327	mdh_2	NAD-dependent methanol dehydrogenase	c
ecl8_01328	ecl8_01328	ecl8_01328	hypothetical protein	c
ecl8_01329	ecl8_01329	ecl8_01329	hypothetical protein	c
eutB_1	ecl8_01330	eutB_1	Ethanolamine ammonia-lyase heavy chain	c
eutC_1	ecl8_01331	eutC_1	Ethanolamine ammonia-lyase light chain	c
eutL	ecl8_01332	eutL	Ethanolamine utilization protein EutL	c
eutK	ecl8_01333	eutK	Ethanolamine utilization protein EutK	c
ecl8_01334	ecl8_01334	ecl8_01334	hypothetical protein	c
hemF	ecl8_01335	hemF	Oxygen-dependent coproporphyrinogen-III oxidase	c
amiA	ecl8_01336	amiA	N-acetylmuramoyl-L-alanine amidase AmiA	c
ypeA	ecl8_01337	ypeA	Acetyltransferase YpeA	c
yfeZ	ecl8_01338	yfeZ	Inner membrane protein YfeZ	c
yfeY	ecl8_01339	yfeY	putative protein YfeY	c
yfeX	ecl8_01340	yfeX	putative deferrochelatase/peroxidase YfeX	c
cysP	ecl8_01341	cysP	Thiosulfate-binding protein	c
cysT	ecl8_01342	cysT	Sulfate transport system permease protein CysT	c
cysW_1	ecl8_01343	cysW_1	Sulfate transport system permease protein CysW	c
cysA_1	ecl8_01344	cysA_1	Sulfate/thiosulfate import ATP-binding protein CysA	c
cysM	ecl8_01345	cysM	Cysteine synthase B	c
yybH	ecl8_01346	yybH	putative protein YybH	c
ptsJ_1	ecl8_01347	ptsJ_1	Vitamin B6 salvage pathway transcriptional repressor PtsJ	c
pdxK	ecl8_01348	pdxK	Pyridoxine/pyridoxal/pyridoxamine kinase	c
ecl8_01349	ecl8_01349	ecl8_01349	hypothetical protein	c
crr	ecl8_01350	crr	PTS system glucose-specific EIIA component	c
ptsI	ecl8_01351	ptsI	Phosphoenolpyruvate-protein phosphotransferase	c
ptsH	ecl8_01352	ptsH	Phosphocarrier protein HPr	c
cysK	ecl8_01353	cysK	Cysteine synthase A	c
cysZ	ecl8_01354	cysZ	Sulfate transporter CysZ	c
zipA	ecl8_01355	zipA	Cell division protein ZipA	c
ligA	ecl8_01356	ligA	DNA ligase	c
ecl8_01357	ecl8_01357	ecl8_01357	hypothetical protein	c
ecl8_01358	ecl8_01358	ecl8_01358	hypothetical protein	c
cynR_1	ecl8_01359	cynR_1	HTH-type transcriptional regulator CynR	c
ecl8_01360	ecl8_01360	ecl8_01360	tRNA-Lys	c
ecl8_01361	ecl8_01361	ecl8_01361	tRNA-Val	c
ecl8_01362	ecl8_01362	ecl8_01362	tRNA-Val	c
ecl8_01363	ecl8_01363	ecl8_01363	tRNA-Val	c
gltX	ecl8_01364	gltX	Glutamate--tRNA ligase	c
ecl8_01365	ecl8_01365	ecl8_01365	hypothetical protein	c
ecl8_01366	ecl8_01366	ecl8_01366	hypothetical protein	c
ecl8_01367	ecl8_01367	ecl8_01367	tRNA-Ala	c
ecl8_01368	ecl8_01368	ecl8_01368	tRNA-Ala	c
pdeA	ecl8_01369	pdeA	putative cyclic di-GMP phosphodiesterase PdeA	c
nupC_1	ecl8_01370	nupC_1	Nucleoside permease NupC	c
mntH	ecl8_01371	mntH	Divalent metal cation transporter MntH	c
ecl8_01372	ecl8_01372	ecl8_01372	hypothetical protein	c
gpr	ecl8_01373	gpr	L-glyceraldehyde 3-phosphate reductase	c
ipdC	ecl8_01374	ipdC	Indole-3-pyruvate decarboxylase	c
yfeO	ecl8_01375	yfeO	Putative ion-transport protein YfeO	c
glk	ecl8_01376	glk	Glucokinase	c
ypdB	ecl8_01377	ypdB	Transcriptional regulatory protein YpdB	c
ypdA	ecl8_01378	ypdA	Sensor histidine kinase YpdA	c
alaC	ecl8_01379	alaC	Glutamate-pyruvate aminotransferase AlaC	c
yycB	ecl8_01380	yycB	putative transporter YycB	c
guaD_1	ecl8_01381	guaD_1	Guanine deaminase	c
cynR_2	ecl8_01382	cynR_2	HTH-type transcriptional regulator CynR	c
ecl8_01383	ecl8_01383	ecl8_01383	hypothetical protein	c
ecl8_01384	ecl8_01384	ecl8_01384	hypothetical protein	c
ecl8_01385	ecl8_01385	ecl8_01385	tRNA-Arg	c
intA_4	ecl8_01386	intA_4	Prophage integrase IntA	c
ecl8_01387	ecl8_01387	ecl8_01387	hypothetical protein	c
ecl8_01388	ecl8_01388	ecl8_01388	hypothetical protein	c
ecl8_01389	ecl8_01389	ecl8_01389	hypothetical protein	c
ecl8_01390	ecl8_01390	ecl8_01390	hypothetical protein	c
ecl8_01391	ecl8_01391	ecl8_01391	hypothetical protein	c
ecl8_01392	ecl8_01392	ecl8_01392	hypothetical protein	c
ecl8_01393	ecl8_01393	ecl8_01393	hypothetical protein	c
rdgC_1	ecl8_01394	rdgC_1	Recombination-associated protein RdgC	c
lexA_1	ecl8_01395	lexA_1	LexA repressor	c
ecl8_01396	ecl8_01396	ecl8_01396	hypothetical protein	c
ecl8_01397	ecl8_01397	ecl8_01397	hypothetical protein	c
dam_2	ecl8_01398	dam_2	DNA adenine methylase	c
rusA	ecl8_01399	rusA	Crossover junction endodeoxyribonuclease RusA	c
ecl8_01400	ecl8_01400	ecl8_01400	hypothetical protein	c
ecl8_01401	ecl8_01401	ecl8_01401	hypothetical protein	c
ecl8_01402	ecl8_01402	ecl8_01402	tRNA-Thr	c
ecl8_01403	ecl8_01403	ecl8_01403	hypothetical protein	c
ecl8_01404	ecl8_01404	ecl8_01404	hypothetical protein	c
ecl8_01405	ecl8_01405	ecl8_01405	hypothetical protein	c
ecl8_01406	ecl8_01406	ecl8_01406	hypothetical protein	c
ecl8_01407	ecl8_01407	ecl8_01407	hypothetical protein	c
ecl8_01408	ecl8_01408	ecl8_01408	hypothetical protein	c
ecl8_01409	ecl8_01409	ecl8_01409	hypothetical protein	c
ecl8_01410	ecl8_01410	ecl8_01410	hypothetical protein	c
ecl8_01411	ecl8_01411	ecl8_01411	hypothetical protein	c
ecl8_01412	ecl8_01412	ecl8_01412	hypothetical protein	c
ecl8_01413	ecl8_01413	ecl8_01413	hypothetical protein	c
ecl8_01414	ecl8_01414	ecl8_01414	hypothetical protein	c
ecl8_01415	ecl8_01415	ecl8_01415	hypothetical protein	c
ecl8_01416	ecl8_01416	ecl8_01416	hypothetical protein	c
ecl8_01417	ecl8_01417	ecl8_01417	hypothetical protein	c
ecl8_01418	ecl8_01418	ecl8_01418	hypothetical protein	c
ecl8_01419	ecl8_01419	ecl8_01419	hypothetical protein	c
ecl8_01420	ecl8_01420	ecl8_01420	hypothetical protein	c
ecl8_01421	ecl8_01421	ecl8_01421	hypothetical protein	c
ecl8_01422	ecl8_01422	ecl8_01422	hypothetical protein	c
ecl8_01423	ecl8_01423	ecl8_01423	hypothetical protein	c
ecl8_01424	ecl8_01424	ecl8_01424	hypothetical protein	c
ecl8_01425	ecl8_01425	ecl8_01425	hypothetical protein	c
ecl8_01426	ecl8_01426	ecl8_01426	hypothetical protein	c
bamE_2	ecl8_01427	bamE_2	Outer membrane protein assembly factor BamE	c
ecl8_01428	ecl8_01428	ecl8_01428	hypothetical protein	c
ecl8_01429	ecl8_01429	ecl8_01429	hypothetical protein	c
ecl8_01430	ecl8_01430	ecl8_01430	hypothetical protein	c
ecl8_01431	ecl8_01431	ecl8_01431	hypothetical protein	c
ecl8_01432	ecl8_01432	ecl8_01432	hypothetical protein	c
ecl8_01433	ecl8_01433	ecl8_01433	hypothetical protein	c
ecl8_01434	ecl8_01434	ecl8_01434	hypothetical protein	c
ecl8_01435	ecl8_01435	ecl8_01435	hypothetical protein	c
ecl8_01436	ecl8_01436	ecl8_01436	hypothetical protein	c
ecl8_01437	ecl8_01437	ecl8_01437	hypothetical protein	c
ecl8_01438	ecl8_01438	ecl8_01438	hypothetical protein	c
yfdC	ecl8_01439	yfdC	Inner membrane protein YfdC	c
mlaA	ecl8_01440	mlaA	putative phospholipid-binding lipoprotein MlaA	c
fadL	ecl8_01441	fadL	Long-chain fatty acid transport protein	c
ecl8_01442	ecl8_01442	ecl8_01442	hypothetical protein	c
fadI	ecl8_01443	fadI	3-ketoacyl-CoA thiolase FadI	c
fadJ	ecl8_01444	fadJ	Fatty acid oxidation complex subunit alpha	c
sixA	ecl8_01445	sixA	Phosphohistidine phosphatase SixA	c
smrA_1	ecl8_01446	smrA_1	putative DNA endonuclease SmrA	c
prmB	ecl8_01447	prmB	50S ribosomal protein L3 glutamine methyltransferase	c
aroC	ecl8_01448	aroC	Chorismate synthase	c
mepA	ecl8_01449	mepA	Penicillin-insensitive murein endopeptidase	c
yfcA	ecl8_01450	yfcA	putative membrane transporter protein YfcA	c
epmC	ecl8_01451	epmC	Elongation factor P hydroxylase	c
ecl8_01452	ecl8_01452	ecl8_01452	hypothetical protein	c
mnmC	ecl8_01453	mnmC	tRNA 5-methylaminomethyl-2-thiouridine biosynthesis bifunctional protein MnmC	c
fabB	ecl8_01454	fabB	3-oxoacyl-[acyl-carrier-protein] synthase 1	c
yfcJ	ecl8_01455	yfcJ	putative MFS-type transporter YfcJ	c
flk	ecl8_01456	flk	Flagellar regulator flk	c
pdxB	ecl8_01457	pdxB	Erythronate-4-phosphate dehydrogenase	c
usg	ecl8_01458	usg	USG-1 protein	c
truA	ecl8_01459	truA	tRNA pseudouridine synthase A	c
dedA	ecl8_01460	dedA	Protein DedA	c
accD	ecl8_01461	accD	Acetyl-coenzyme A carboxylase carboxyl transferase subunit beta	c
folC	ecl8_01462	folC	Dihydrofolate synthase/folylpolyglutamate synthase	c
dedD	ecl8_01463	dedD	Cell division protein DedD	c
cvpA	ecl8_01464	cvpA	Colicin V production protein	c
purF	ecl8_01465	purF	Amidophosphoribosyltransferase	c
ubiX	ecl8_01466	ubiX	Flavin prenyltransferase UbiX	c
argT	ecl8_01467	argT	Lysine/arginine/ornithine-binding periplasmic protein	c
hisJ_1	ecl8_01468	hisJ_1	Histidine-binding periplasmic protein	c
hisQ_1	ecl8_01469	hisQ_1	Histidine transport system permease protein HisQ	c
hisM	ecl8_01470	hisM	Histidine transport system permease protein HisM	c
hisP	ecl8_01471	hisP	Histidine transport ATP-binding protein HisP	c
ecl8_01472	ecl8_01472	ecl8_01472	hypothetical protein	c
ecl8_01473	ecl8_01473	ecl8_01473	Epimerase family protein	c
folX	ecl8_01474	folX	Dihydroneopterin triphosphate 2'-epimerase	c
yfcG_1	ecl8_01475	yfcG_1	Disulfide-bond oxidoreductase YfcG	c
yfcF	ecl8_01476	yfcF	Glutathione S-transferase YfcF	c
yfcE	ecl8_01477	yfcE	Phosphodiesterase YfcE	c
yfcD	ecl8_01478	yfcD	putative Nudix hydrolase YfcD	c
pta	ecl8_01479	pta	Phosphate acetyltransferase	c
ackA	ecl8_01480	ackA	Acetate kinase	c
ecl8_01481	ecl8_01481	ecl8_01481	hypothetical protein	c
ecl8_01482	ecl8_01482	ecl8_01482	hypothetical protein	c
hxpA	ecl8_01483	hxpA	Hexitol phosphatase A	c
sdcS	ecl8_01484	sdcS	Sodium-dependent dicarboxylate transporter SdcS	c
yfbR	ecl8_01485	yfbR	5'-deoxynucleotidase YfbR	c
alaA	ecl8_01486	alaA	Glutamate-pyruvate aminotransferase AlaA	c
cmpR_1	ecl8_01487	cmpR_1	HTH-type transcriptional activator CmpR	c
ndhC	ecl8_01488	ndhC	NAD(P)H-quinone oxidoreductase subunit 3	c
nuoB	ecl8_01489	nuoB	NADH-quinone oxidoreductase subunit B	c
nuoC	ecl8_01490	nuoC	NADH-quinone oxidoreductase subunit C/D	c
nuoE	ecl8_01491	nuoE	NADH-quinone oxidoreductase subunit E	c
nuoF	ecl8_01492	nuoF	NADH-quinone oxidoreductase subunit F	c
nuoG	ecl8_01493	nuoG	NADH-quinone oxidoreductase subunit G	c
nuoH	ecl8_01494	nuoH	NADH-quinone oxidoreductase subunit H	c
nuoI_2	ecl8_01495	nuoI_2	NADH-quinone oxidoreductase subunit I	c
nuoJ	ecl8_01496	nuoJ	NADH-quinone oxidoreductase subunit J	c
nuoK	ecl8_01497	nuoK	NADH-quinone oxidoreductase subunit K	c
nuoL	ecl8_01498	nuoL	NADH-quinone oxidoreductase subunit L	c
nuoM	ecl8_01499	nuoM	NADH-quinone oxidoreductase subunit M	c
nuoN	ecl8_01500	nuoN	NADH-quinone oxidoreductase subunit N	c
rbn_1	ecl8_01501	rbn_1	Ribonuclease BN	c
ecl8_01502	ecl8_01502	ecl8_01502	hypothetical protein	c
menF	ecl8_01503	menF	Isochorismate synthase MenF	c
menD	ecl8_01504	menD	2-succinyl-5-enolpyruvyl-6-hydroxy-3- cyclohexene-1-carboxylate synthase	c
menH	ecl8_01505	menH	2-succinyl-6-hydroxy-2, 4-cyclohexadiene-1-carboxylate synthase	c
menB	ecl8_01506	menB	1,4-dihydroxy-2-naphthoyl-CoA synthase	c
menC	ecl8_01507	menC	o-succinylbenzoate synthase	c
menE	ecl8_01508	menE	2-succinylbenzoate--CoA ligase	c
nudI	ecl8_01509	nudI	Nucleoside triphosphatase NudI	c
rpnA_2	ecl8_01510	rpnA_2	Recombination-promoting nuclease RpnA	c
ecl8_01511	ecl8_01511	ecl8_01511	hypothetical protein	c
pncC_2	ecl8_01512	pncC_2	Nicotinamide-nucleotide amidohydrolase PncC	c
rhmR	ecl8_01513	rhmR	putative HTH-type transcriptional regulator RhmR	c
rhmD	ecl8_01514	rhmD	L-rhamnonate dehydratase	c
rhmT_1	ecl8_01515	rhmT_1	Inner membrane transport protein RhmT	c
rhmT_2	ecl8_01516	rhmT_2	Inner membrane transport protein RhmT	c
rhmA	ecl8_01517	rhmA	2-keto-3-deoxy-L-rhamnonate aldolase	c
glpC	ecl8_01518	glpC	Anaerobic glycerol-3-phosphate dehydrogenase subunit C	c
glpB	ecl8_01519	glpB	Anaerobic glycerol-3-phosphate dehydrogenase subunit B	c
glpA	ecl8_01520	glpA	Anaerobic glycerol-3-phosphate dehydrogenase subunit A	c
glpT_1	ecl8_01521	glpT_1	Glycerol-3-phosphate transporter	c
glpQ	ecl8_01522	glpQ	Glycerophosphodiester phosphodiesterase, periplasmic	c
ascD	ecl8_01523	ascD	CDP-6-deoxy-L-threo-D-glycero-4-hexulose-3- dehydrase reductase	c
nrdB	ecl8_01524	nrdB	Ribonucleoside-diphosphate reductase 1 subunit beta	c
nrdA	ecl8_01525	nrdA	Ribonucleoside-diphosphate reductase 1 subunit alpha	c
ubiG	ecl8_01526	ubiG	Ubiquinone biosynthesis O-methyltransferase	c
gyrA	ecl8_01527	gyrA	DNA gyrase subunit A	c
atoB	ecl8_01528	atoB	Acetyl-CoA acetyltransferase	c
atoE	ecl8_01529	atoE	Putative short-chain fatty acid transporter	c
atoA	ecl8_01530	atoA	Acetate CoA-transferase subunit beta	c
atoD	ecl8_01531	atoD	Acetate CoA-transferase subunit alpha	c
atoC	ecl8_01532	atoC	Regulatory protein AtoC	c
atoS	ecl8_01533	atoS	Signal transduction histidine-protein kinase AtoS	c
rcsC	ecl8_01534	rcsC	Sensor histidine kinase RcsC	c
rcsB	ecl8_01535	rcsB	Transcriptional regulatory protein RcsB	c
rcsD	ecl8_01536	rcsD	Phosphotransferase RcsD	c
ompC	ecl8_01537	ompC	Outer membrane protein C	c
apbE_1	ecl8_01538	apbE_1	FAD:protein FMN transferase	c
ada_2	ecl8_01539	ada_2	Bifunctional transcriptional activator/DNA repair enzyme Ada	c
alkB	ecl8_01540	alkB	Alpha-ketoglutarate-dependent dioxygenase AlkB	c
yojI	ecl8_01541	yojI	ABC transporter ATP-binding/permease protein YojI	c
ecl8_01542	ecl8_01542	ecl8_01542	Magnesium transporter MgtE	c
bicA	ecl8_01543	bicA	Bicarbonate transporter BicA	c
mqo_1	ecl8_01544	mqo_1	Malate:quinone oxidoreductase	c
eco	ecl8_01545	eco	Ecotin	c
ecl8_01546	ecl8_01546	ecl8_01546	Putative transport protein	c
ecl8_01547	ecl8_01547	ecl8_01547	tRNA-Pro	c
yejM	ecl8_01548	yejM	Inner membrane protein YejM	c
ecl8_01549	ecl8_01549	ecl8_01549	hypothetical protein	c
yejK	ecl8_01550	yejK	Nucleoid-associated protein YejK	c
glcR_1	ecl8_01551	glcR_1	HTH-type transcriptional repressor GlcR	c
nudK_2	ecl8_01552	nudK_2	GDP-mannose pyrophosphatase NudK	c
nylB	ecl8_01553	nylB	6-aminohexanoate-dimer hydrolase	c
allS_2	ecl8_01554	allS_2	HTH-type transcriptional activator AllS	c
rplY	ecl8_01555	rplY	50S ribosomal protein L25	c
radD	ecl8_01556	radD	Putative DNA repair helicase RadD	c
rsuA	ecl8_01557	rsuA	Ribosomal small subunit pseudouridine synthase A	c
bcr_2	ecl8_01558	bcr_2	Bicyclomycin resistance protein	c
yejG	ecl8_01559	yejG	putative protein YejG	c
yejF_2	ecl8_01560	yejF_2	putative ABC transporter ATP-binding protein YejF	c
yejE	ecl8_01561	yejE	Inner membrane ABC transporter permease protein YejE	c
yejB	ecl8_01562	yejB	Inner membrane ABC transporter permease protein YejB	c
appA_2	ecl8_01563	appA_2	Oligopeptide-binding protein AppA	c
pdeN	ecl8_01564	pdeN	putative cyclic di-GMP phosphodiesterase PdeN	c
mepS_1	ecl8_01565	mepS_1	Murein DD-endopeptidase MepS/Murein LD-carboxypeptidase	c
lpxT	ecl8_01566	lpxT	Lipid A 1-diphosphate synthase	c
yeiR	ecl8_01567	yeiR	Zinc-binding GTPase YeiR	c
por_1	ecl8_01568	por_1	Polyol:NADP oxidoreductase	c
uxuA_2	ecl8_01569	uxuA_2	Mannonate dehydratase	c
yeiP	ecl8_01570	yeiP	Elongation factor P-like protein	c
ecl8_01571	ecl8_01571	ecl8_01571	hypothetical protein	c
setB	ecl8_01572	setB	Sugar efflux transporter B	c
fruB_1	ecl8_01573	fruB_1	Multiphosphoryl transfer protein	c
lacC	ecl8_01574	lacC	Tagatose-6-phosphate kinase	c
fruA_1	ecl8_01575	fruA_1	PTS system fructose-specific EIIB'BC component	c
nfo	ecl8_01576	nfo	Endonuclease 4	c
ecl8_01577	ecl8_01577	ecl8_01577	hypothetical protein	c
cmpR_2	ecl8_01578	cmpR_2	HTH-type transcriptional activator CmpR	c
lysP	ecl8_01579	lysP	Lysine-specific permease	c
ecl8_01580	ecl8_01580	ecl8_01580	hypothetical protein	c
ecl8_01581	ecl8_01581	ecl8_01581	hypothetical protein	c
cirA	ecl8_01582	cirA	Colicin I receptor	c
yeiG	ecl8_01583	yeiG	S-formylglutathione hydrolase YeiG	c
folE	ecl8_01584	folE	GTP cyclohydrolase 1	c
ecl8_01585	ecl8_01585	ecl8_01585	hypothetical protein	c
galS	ecl8_01586	galS	HTH-type transcriptional regulator GalS	c
mglB	ecl8_01587	mglB	D-galactose-binding periplasmic protein	c
mglA_1	ecl8_01588	mglA_1	Galactose/methyl galactoside import ATP-binding protein MglA	c
mglC	ecl8_01589	mglC	Galactoside transport system permease protein MglC	c
ecl8_01590	ecl8_01590	ecl8_01590	hypothetical protein	c
cdd	ecl8_01591	cdd	Cytidine deaminase	c
yohK_1	ecl8_01592	yohK_1	Inner membrane protein YohK	c
ecl8_01593	ecl8_01593	ecl8_01593	hypothetical protein	c
dusC	ecl8_01594	dusC	tRNA-dihydrouridine(16) synthase	c
oprB	ecl8_01595	oprB	Porin B	c
bglG	ecl8_01596	bglG	Cryptic beta-glucoside bgl operon antiterminator	c
bglF_2	ecl8_01597	bglF_2	PTS system beta-glucoside-specific EIIBCA component	c
bglB	ecl8_01598	bglB	6-phospho-beta-glucosidase BglB	c
oprM_2	ecl8_01599	oprM_2	Outer membrane protein OprM	c
yohD	ecl8_01600	yohD	Inner membrane protein YohD	c
yohC	ecl8_01601	yohC	Inner membrane protein YohC	c
pbpG	ecl8_01602	pbpG	D-alanyl-D-alanine endopeptidase	c
pat_2	ecl8_01603	pat_2	Phosphinothricin N-acetyltransferase	c
dld	ecl8_01604	dld	Quinone-dependent D-lactate dehydrogenase	c
ecl8_01605	ecl8_01605	ecl8_01605	Beta-glucosidase BoGH3B	c
yehZ	ecl8_01606	yehZ	Glycine betaine-binding protein YehZ	c
yehY	ecl8_01607	yehY	Glycine betaine uptake system permease protein YehY	c
yehX	ecl8_01608	yehX	Glycine betaine uptake system ATP-binding protein YehX	c
yehW	ecl8_01609	yehW	Glycine betaine uptake system permease protein YehW	c
ecl8_01610	ecl8_01610	ecl8_01610	hypothetical protein	c
btsS	ecl8_01611	btsS	Sensor histidine kinase BtsS	c
btsR	ecl8_01612	btsR	Transcriptional regulatory protein BtsR	c
ecl8_01613	ecl8_01613	ecl8_01613	hypothetical protein	c
metG	ecl8_01614	metG	Methionine--tRNA ligase	c
apbC	ecl8_01615	apbC	Iron-sulfur cluster carrier protein	c
yafP_1	ecl8_01616	yafP_1	putative N-acetyltransferase YafP	c
rcnB_1	ecl8_01617	rcnB_1	Nickel/cobalt homeostasis protein RcnB	c
dmlR_7	ecl8_01618	dmlR_7	HTH-type transcriptional regulator DmlR	c
adeQ	ecl8_01619	adeQ	Adenine permease AdeQ	c
ade2	ecl8_01620	ade2	Adenine deaminase 2	c
oxyR_1	ecl8_01621	oxyR_1	Hydrogen peroxide-inducible genes activator	c
uspA_2	ecl8_01622	uspA_2	Universal stress protein A	c
thiM	ecl8_01623	thiM	Hydroxyethylthiazole kinase	c
thiD	ecl8_01624	thiD	Hydroxymethylpyrimidine/phosphomethylpyrimidine kinase	c
fbaB	ecl8_01625	fbaB	Fructose-bisphosphate aldolase class 1	c
csbX_1	ecl8_01626	csbX_1	Alpha-ketoglutarate permease	c
araB_1	ecl8_01627	araB_1	Ribulokinase	c
rbtD	ecl8_01628	rbtD	Ribitol 2-dehydrogenase	c
degA	ecl8_01629	degA	HTH-type transcriptional regulator DegA	c
lsrR_2	ecl8_01630	lsrR_2	Transcriptional regulator LsrR	c
mtlK	ecl8_01631	mtlK	Mannitol 2-dehydrogenase	c
xylB_2	ecl8_01632	xylB_2	Xylulose kinase	c
xylB_3	ecl8_01633	xylB_3	Xylulose kinase	c
csbX_2	ecl8_01634	csbX_2	Alpha-ketoglutarate permease	c
hxpB_1	ecl8_01635	hxpB_1	Hexitol phosphatase B	c
gci	ecl8_01636	gci	D-galactarolactone cycloisomerase	c
ddpA_1	ecl8_01637	ddpA_1	putative D,D-dipeptide-binding periplasmic protein DdpA	c
ddpB	ecl8_01638	ddpB	putative D,D-dipeptide transport system permease protein DdpB	c
ddpC_2	ecl8_01639	ddpC_2	putative D,D-dipeptide transport system permease protein DdpC	c
oppD_2	ecl8_01640	oppD_2	Oligopeptide transport ATP-binding protein OppD	c
oppF_2	ecl8_01641	oppF_2	Oligopeptide transport ATP-binding protein OppF	c
yegS	ecl8_01642	yegS	putative lipid kinase YegS	c
ydcP_1	ecl8_01643	ydcP_1	putative protease YdcP	c
baeR	ecl8_01644	baeR	Transcriptional regulatory protein BaeR	c
baeS	ecl8_01645	baeS	Signal transduction histidine-protein kinase BaeS	c
mdtD	ecl8_01646	mdtD	Putative multidrug resistance protein MdtD	c
mdtC	ecl8_01647	mdtC	Multidrug resistance protein MdtC	c
mdtB	ecl8_01648	mdtB	Multidrug resistance protein MdtB	c
mdtA_1	ecl8_01649	mdtA_1	Multidrug resistance protein MdtA	c
dctA_2	ecl8_01650	dctA_2	C4-dicarboxylate transport protein	c
ecl8_01651	ecl8_01651	ecl8_01651	hypothetical protein	c
ecl8_01652	ecl8_01652	ecl8_01652	hypothetical protein	c
phoP_1	ecl8_01653	phoP_1	Virulence transcriptional regulatory protein PhoP	c
walK	ecl8_01654	walK	Sensor histidine kinase WalK	c
dnaK_1	ecl8_01655	dnaK_1	Chaperone protein DnaK	c
alkA	ecl8_01656	alkA	DNA-3-methyladenine glycosylase 2	c
udk	ecl8_01657	udk	Uridine kinase	c
dcd	ecl8_01658	dcd	dCTP deaminase	c
ecl8_01659	ecl8_01659	ecl8_01659	hypothetical protein	c
ecl8_01660	ecl8_01660	ecl8_01660	hypothetical protein	c
galF	ecl8_01661	galF	UTP--glucose-1-phosphate uridylyltransferase	c
ecl8_01662	ecl8_01662	ecl8_01662	hypothetical protein	c
ecl8_01663	ecl8_01663	ecl8_01663	hypothetical protein	c
ecl8_01664	ecl8_01664	ecl8_01664	hypothetical protein	c
ecl8_01665	ecl8_01665	ecl8_01665	Putative tyrosine-protein kinase in cps region	c
kanF	ecl8_01666	kanF	2-deoxystreptamine glucosyltransferase	c
ecl8_01667	ecl8_01667	ecl8_01667	hypothetical protein	c
ecl8_01668	ecl8_01668	ecl8_01668	hypothetical protein	c
ecl8_01669	ecl8_01669	ecl8_01669	hypothetical protein	c
wzxC	ecl8_01670	wzxC	Lipopolysaccharide biosynthesis protein WzxC	c
ecl8_01671	ecl8_01671	ecl8_01671	hypothetical protein	c
oatWY	ecl8_01672	oatWY	Polysialic acid O-acetyltransferase	c
wcaJ	ecl8_01673	wcaJ	UDP-glucose:undecaprenyl-phosphate glucose-1-phosphate transferase	c
gnd	ecl8_01674	gnd	6-phosphogluconate dehydrogenase, decarboxylating	c
manC1	ecl8_01675	manC1	Mannose-1-phosphate guanylyltransferase 1	c
algC	ecl8_01676	algC	Phosphomannomutase/phosphoglucomutase	c
ugd	ecl8_01677	ugd	UDP-glucose 6-dehydrogenase	c
wbgU	ecl8_01678	wbgU	UDP-N-acetylglucosamine 4-epimerase	c
tagG	ecl8_01679	tagG	Teichoic acid translocation permease protein TagG	c
tagH	ecl8_01680	tagH	Teichoic acids export ATP-binding protein TagH	c
gspA	ecl8_01681	gspA	General stress protein A	c
rfbD	ecl8_01682	rfbD	UDP-galactopyranose mutase	c
ecl8_01683	ecl8_01683	ecl8_01683	hypothetical protein	c
pglA	ecl8_01684	pglA	N, N'-diacetylbacillosaminyl-diphospho-undecaprenol alpha-1,3-N-acetylgalactosaminyltransferase	c
epsJ_3	ecl8_01685	epsJ_3	putative glycosyltransferase EpsJ	c
ecl8_01686	ecl8_01686	ecl8_01686	hypothetical protein	c
ykoT	ecl8_01687	ykoT	putative glycosyltransferase YkoT	c
ecl8_01688	ecl8_01688	ecl8_01688	hypothetical protein	c
hisI_1	ecl8_01689	hisI_1	Phosphoribosyl-AMP cyclohydrolase	c
hisF	ecl8_01690	hisF	Imidazole glycerol phosphate synthase subunit HisF	c
hisA	ecl8_01691	hisA	1-(5-phosphoribosyl)-5-[(5- phosphoribosylamino)methylideneamino] imidazole-4-carboxamide isomerase	c
hisH	ecl8_01692	hisH	Imidazole glycerol phosphate synthase subunit HisH	c
hisB	ecl8_01693	hisB	Histidine biosynthesis bifunctional protein HisB	c
hisC	ecl8_01694	hisC	Histidinol-phosphate aminotransferase	c
hisD	ecl8_01695	hisD	Histidinol dehydrogenase	c
hisG	ecl8_01696	hisG	ATP phosphoribosyltransferase	c
yeeZ	ecl8_01697	yeeZ	Protein YeeZ	c
yhaJ_2	ecl8_01698	yhaJ_2	HTH-type transcriptional regulator YhaJ	c
plaP	ecl8_01699	plaP	Low-affinity putrescine importer PlaP	c
ecl8_01700	ecl8_01700	ecl8_01700	hypothetical protein	c
fusA_2	ecl8_01701	fusA_2	Elongation factor G	c
sbcB	ecl8_01702	sbcB	Exodeoxyribonuclease I	c
dacD	ecl8_01703	dacD	D-alanyl-D-alanine carboxypeptidase DacD	c
sbmC	ecl8_01704	sbmC	DNA gyrase inhibitor	c
yeeA	ecl8_01705	yeeA	Inner membrane protein YeeA	c
ecl8_01706	ecl8_01706	ecl8_01706	hypothetical protein	c
cobS	ecl8_01707	cobS	Adenosylcobinamide-GDP ribazoletransferase	c
cobT_2	ecl8_01708	cobT_2	Nicotinate-nucleotide--dimethylbenzimidazole phosphoribosyltransferase	c
cobT_3	ecl8_01709	cobT_3	Nicotinate-nucleotide--dimethylbenzimidazole phosphoribosyltransferase	c
ahcY	ecl8_01710	ahcY	Adenosylhomocysteinase	c
ecl8_01711	ecl8_01711	ecl8_01711	hypothetical protein	c
ecl8_01712	ecl8_01712	ecl8_01712	hypothetical protein	c
dmlR_8	ecl8_01713	dmlR_8	HTH-type transcriptional regulator DmlR	c
ecl8_01714	ecl8_01714	ecl8_01714	hypothetical protein	c
yhjE_2	ecl8_01715	yhjE_2	Inner membrane metabolite transport protein YhjE	c
ecl8_01716	ecl8_01716	ecl8_01716	hypothetical protein	c
ecl8_01717	ecl8_01717	ecl8_01717	hypothetical protein	c
ecl8_01718	ecl8_01718	ecl8_01718	hypothetical protein	c
ecl8_01719	ecl8_01719	ecl8_01719	putative signaling protein	c
yeaR_1	ecl8_01720	yeaR_1	putative protein YeaR	c
yoaG	ecl8_01721	yoaG	Protein YoaG	c
gcvA_2	ecl8_01722	gcvA_2	Glycine cleavage system transcriptional activator	c
ecl8_01723	ecl8_01723	ecl8_01723	hypothetical protein	c
cpo	ecl8_01724	cpo	Non-heme chloroperoxidase	c
dgcP_1	ecl8_01725	dgcP_1	Diguanylate cyclase DgcP	c
ecl8_01726	ecl8_01726	ecl8_01726	hypothetical protein	c
ecl8_01727	ecl8_01727	ecl8_01727	hypothetical protein	c
ecl8_01728	ecl8_01728	ecl8_01728	hypothetical protein	c
nimR_2	ecl8_01729	nimR_2	HTH-type transcriptional regulator NimR	c
aaeB_2	ecl8_01730	aaeB_2	p-hydroxybenzoic acid efflux pump subunit AaeB	c
ecl8_01731	ecl8_01731	ecl8_01731	hypothetical protein	c
aaeA_2	ecl8_01732	aaeA_2	p-hydroxybenzoic acid efflux pump subunit AaeA	c
ecl8_01733	ecl8_01733	ecl8_01733	hypothetical protein	c
ecl8_01734	ecl8_01734	ecl8_01734	hypothetical protein	c
ecl8_01735	ecl8_01735	ecl8_01735	hypothetical protein	c
fabG_4	ecl8_01736	fabG_4	3-oxoacyl-[acyl-carrier-protein] reductase FabG	c
ecl8_01737	ecl8_01737	ecl8_01737	putative transporter	c
ecl8_01738	ecl8_01738	ecl8_01738	Putative HTH-type transcriptional regulator	c
mdtJ_1	ecl8_01739	mdtJ_1	Spermidine export protein MdtJ	c
ecl8_01740	ecl8_01740	ecl8_01740	Putative 2-dehydropantoate 2-reductase	c
ecl8_01741	ecl8_01741	ecl8_01741	hypothetical protein	c
intA_5	ecl8_01742	intA_5	Prophage integrase IntA	c
ecl8_01743	ecl8_01743	ecl8_01743	tRNA-Asn	c
yeeO	ecl8_01744	yeeO	putative FMN/FAD exporter YeeO	c
ecl8_01745	ecl8_01745	ecl8_01745	tRNA-Asn	c
amn	ecl8_01746	amn	AMP nucleosidase	c
pmrD	ecl8_01747	pmrD	Signal transduction protein PmrD	c
ecl8_01748	ecl8_01748	ecl8_01748	Thermostable monoacylglycerol lipase	c
ecl8_01749	ecl8_01749	ecl8_01749	hypothetical protein	c
acuI	ecl8_01750	acuI	putative acrylyl-CoA reductase AcuI	c
acuR	ecl8_01751	acuR	Transcriptional regulator AcuR	c
nhaK_1	ecl8_01752	nhaK_1	Sodium, potassium, lithium and rubidium/H(+) antiporter	c
ecl8_01753	ecl8_01753	ecl8_01753	tRNA-Asn	c
oxyR_2	ecl8_01754	oxyR_2	Hydrogen peroxide-inducible genes activator	c
cbl_2	ecl8_01755	cbl_2	HTH-type transcriptional regulator cbl	c
erfK	ecl8_01756	erfK	putative L,D-transpeptidase ErfK/SrfK	c
pgrR_3	ecl8_01757	pgrR_3	HTH-type transcriptional regulator PgrR	c
ecl8_01758	ecl8_01758	ecl8_01758	tRNA-Asn	c
mtfA	ecl8_01759	mtfA	Protein MtfA	c
ecl8_01760	ecl8_01760	ecl8_01760	tRNA-Ser	c
ompN_1	ecl8_01761	ompN_1	Outer membrane protein N	c
yedR	ecl8_01762	yedR	Inner membrane protein YedR	c
yedJ	ecl8_01763	yedJ	putative protein YedJ	c
dcm	ecl8_01764	dcm	DNA-cytosine methyltransferase	c
vsr	ecl8_01765	vsr	Very short patch repair protein	c
yedA_1	ecl8_01766	yedA_1	putative inner membrane transporter YedA	c
yedI	ecl8_01767	yedI	Inner membrane protein YedI	c
dgcQ	ecl8_01768	dgcQ	putative diguanylate cyclase DgcQ	c
ecl8_01769	ecl8_01769	ecl8_01769	hypothetical protein	c
dsrB	ecl8_01770	dsrB	Protein DsrB	c
rcsA_1	ecl8_01771	rcsA_1	Transcriptional regulatory protein RcsA	c
ecl8_01772	ecl8_01772	ecl8_01772	hypothetical protein	c
amyA	ecl8_01773	amyA	Cytoplasmic alpha-amylase	c
fliY_1	ecl8_01774	fliY_1	L-cystine-binding protein FliY	c
dcyD	ecl8_01775	dcyD	D-cysteine desulfhydrase	c
yecS_1	ecl8_01776	yecS_1	L-cystine transport system permease protein YecS	c
artM_1	ecl8_01777	artM_1	Arginine transport ATP-binding protein ArtM	c
sdiA	ecl8_01778	sdiA	Regulatory protein SdiA	c
ecl8_01779	ecl8_01779	ecl8_01779	hypothetical protein	c
uvrY	ecl8_01780	uvrY	Response regulator UvrY	c
uvrC	ecl8_01781	uvrC	UvrABC system protein C	c
pgsA	ecl8_01782	pgsA	CDP-diacylglycerol--glycerol-3-phosphate 3-phosphatidyltransferase	c
ecl8_01783	ecl8_01783	ecl8_01783	tRNA-Gly	c
ecl8_01784	ecl8_01784	ecl8_01784	tRNA-Cys	c
ecl8_01785	ecl8_01785	ecl8_01785	tRNA-Leu	c
dapA_2	ecl8_01786	dapA_2	4-hydroxy-tetrahydrodipicolinate synthase	c
secA_1	ecl8_01787	secA_1	Protein translocase subunit SecA	c
tyrP_2	ecl8_01788	tyrP_2	Tyrosine-specific transport protein	c
ecl8_01789	ecl8_01789	ecl8_01789	hypothetical protein	c
ftnA_1	ecl8_01790	ftnA_1	Bacterial non-heme ferritin	c
ecl8_01791	ecl8_01791	ecl8_01791	hypothetical protein	c
hsrA_2	ecl8_01792	hsrA_2	putative transport protein HsrA	c
ecl8_01793	ecl8_01793	ecl8_01793	hypothetical protein	c
yagG_1	ecl8_01794	yagG_1	Putative glycoside/cation symporter YagG	c
ftnA_2	ecl8_01795	ftnA_2	Bacterial non-heme ferritin	c
araF	ecl8_01796	araF	L-arabinose-binding periplasmic protein	c
araG	ecl8_01797	araG	Arabinose import ATP-binding protein AraG	c
rbsC_1	ecl8_01798	rbsC_1	Ribose import permease protein RbsC	c
otsB	ecl8_01799	otsB	Trehalose-6-phosphate phosphatase	c
otsA	ecl8_01800	otsA	Trehalose-6-phosphate synthase	c
uspC	ecl8_01801	uspC	Universal stress protein C	c
yagG_2	ecl8_01802	yagG_2	Putative glycoside/cation symporter YagG	c
yesR	ecl8_01803	yesR	Unsaturated rhamnogalacturonyl hydrolase YesR	c
argS	ecl8_01804	argS	Arginine--tRNA ligase	c
yecM	ecl8_01805	yecM	Protein YecM	c
cutC_1	ecl8_01806	cutC_1	Copper homeostasis protein CutC	c
cmoB	ecl8_01807	cmoB	tRNA U34 carboxymethyltransferase	c
cmoA	ecl8_01808	cmoA	Carboxy-S-adenosyl-L-methionine synthase	c
yecN	ecl8_01809	yecN	Inner membrane protein YecN	c
ecl8_01810	ecl8_01810	ecl8_01810	hypothetical protein	c
yecD	ecl8_01811	yecD	Isochorismatase family protein YecD	c
aspS	ecl8_01812	aspS	Aspartate--tRNA ligase	c
nudB	ecl8_01813	nudB	Dihydroneopterin triphosphate diphosphatase	c
yebC	ecl8_01814	yebC	putative transcriptional regulatory protein YebC	c
ruvC	ecl8_01815	ruvC	Crossover junction endodeoxyribonuclease RuvC	c
ruvA	ecl8_01816	ruvA	Holliday junction ATP-dependent DNA helicase RuvA	c
ruvB	ecl8_01817	ruvB	Holliday junction ATP-dependent DNA helicase RuvB	c
znuB	ecl8_01818	znuB	High-affinity zinc uptake system membrane protein ZnuB	c
znuC	ecl8_01819	znuC	Zinc import ATP-binding protein ZnuC	c
znuA	ecl8_01820	znuA	High-affinity zinc uptake system protein ZnuA	c
mepM_1	ecl8_01821	mepM_1	Murein DD-endopeptidase MepM	c
lpxM	ecl8_01822	lpxM	Lipid A biosynthesis myristoyltransferase	c
pykA	ecl8_01823	pykA	Pyruvate kinase II	c
hexR_1	ecl8_01824	hexR_1	HTH-type transcriptional regulator HexR	c
zwf	ecl8_01825	zwf	Glucose-6-phosphate 1-dehydrogenase	c
edd	ecl8_01826	edd	Phosphogluconate dehydratase	c
eda	ecl8_01827	eda	KHG/KDPG aldolase	c
purT	ecl8_01828	purT	Formate-dependent phosphoribosylglycinamide formyltransferase	c
ecl8_01829	ecl8_01829	ecl8_01829	hypothetical protein	c
yebE	ecl8_01830	yebE	Inner membrane protein YebE	c
ptrB	ecl8_01831	ptrB	Protease 2	c
exoX	ecl8_01832	exoX	Exodeoxyribonuclease 10	c
holE	ecl8_01833	holE	DNA polymerase III subunit theta	c
yobA	ecl8_01834	yobA	Protein YobA	c
yebZ	ecl8_01835	yebZ	Inner membrane protein YebZ	c
ecl8_01836	ecl8_01836	ecl8_01836	hypothetical protein	c
ecl8_01837	ecl8_01837	ecl8_01837	hypothetical protein	c
ecl8_01838	ecl8_01838	ecl8_01838	hypothetical protein	c
pphA	ecl8_01839	pphA	Serine/threonine-protein phosphatase 1	c
ecl8_01840	ecl8_01840	ecl8_01840	hypothetical protein	c
yebV	ecl8_01841	yebV	putative protein YebV	c
rsmF	ecl8_01842	rsmF	Ribosomal RNA small subunit methyltransferase F	c
ecl8_01843	ecl8_01843	ecl8_01843	hypothetical protein	c
yebS	ecl8_01844	yebS	Inner membrane protein YebS	c
msrC	ecl8_01845	msrC	Free methionine-R-sulfoxide reductase	c
proQ	ecl8_01846	proQ	RNA chaperone ProQ	c
prc	ecl8_01847	prc	Tail-specific protease	c
htpX	ecl8_01848	htpX	Protease HtpX	c
ribZ_2	ecl8_01849	ribZ_2	Riboflavin transporter RibZ	c
kdgR_2	ecl8_01850	kdgR_2	Transcriptional regulator KdgR	c
ecl8_01851	ecl8_01851	ecl8_01851	hypothetical protein	c
ecl8_01852	ecl8_01852	ecl8_01852	hypothetical protein	c
cspC	ecl8_01853	cspC	Cold shock-like protein CspC	c
ftsI_1	ecl8_01854	ftsI_1	Peptidoglycan D,D-transpeptidase FtsI	c
rlmA	ecl8_01855	rlmA	23S rRNA (guanine(745)-N(1))-methyltransferase	c
mntP	ecl8_01856	mntP	putative manganese efflux pump MntP	c
ecl8_01857	ecl8_01857	ecl8_01857	hypothetical protein	c
manZ_1	ecl8_01858	manZ_1	PTS system mannose-specific EIID component	c
manY	ecl8_01859	manY	PTS system mannose-specific EIIC component	c
manX_1	ecl8_01860	manX_1	PTS system mannose-specific EIIAB component	c
ecl8_01861	ecl8_01861	ecl8_01861	hypothetical protein	c
pdeD	ecl8_01862	pdeD	putative cyclic di-GMP phosphodiesterase PdeD	c
sdaA	ecl8_01863	sdaA	L-serine dehydratase 1	c
nudL	ecl8_01864	nudL	putative Nudix hydrolase NudL	c
pabB	ecl8_01865	pabB	Aminodeoxychorismate synthase component 1	c
ecl8_01866	ecl8_01866	ecl8_01866	hypothetical protein	c
yabJ_1	ecl8_01867	yabJ_1	2-iminobutanoate/2-iminopropanoate deaminase	c
dinG_1	ecl8_01868	dinG_1	putative ATP-dependent helicase DinG	c
tsaB	ecl8_01869	tsaB	tRNA threonylcarbamoyladenosine biosynthesis protein TsaB	c
slp	ecl8_01870	slp	Outer membrane protein slp	c
fadD	ecl8_01871	fadD	Long-chain-fatty-acid--CoA ligase	c
rnd	ecl8_01872	rnd	Ribonuclease D	c
minE	ecl8_01873	minE	Cell division topological specificity factor	c
minD	ecl8_01874	minD	Septum site-determining protein MinD	c
minC	ecl8_01875	minC	Septum site-determining protein MinC	c
ycgL	ecl8_01876	ycgL	Protein YcgL	c
ycgM	ecl8_01877	ycgM	putative protein YcgM	c
ecl8_01878	ecl8_01878	ecl8_01878	hypothetical protein	c
yeaR_2	ecl8_01879	yeaR_2	putative protein YeaR	c
dsbB	ecl8_01880	dsbB	Disulfide bond formation protein B	c
nhaB	ecl8_01881	nhaB	Na(+)/H(+) antiporter NhaB	c
fadR_1	ecl8_01882	fadR_1	Fatty acid metabolism regulator protein	c
ecl8_01883	ecl8_01883	ecl8_01883	hypothetical protein	c
dadA_1	ecl8_01884	dadA_1	D-amino acid dehydrogenase	c
dadX	ecl8_01885	dadX	Alanine racemase, catabolic	c
cvrA	ecl8_01886	cvrA	K(+)/H(+) antiporter NhaP2	c
ldcA	ecl8_01887	ldcA	Murein tetrapeptide carboxypeptidase	c
emtA	ecl8_01888	emtA	Endo-type membrane-bound lytic murein transglycosylase A	c
fhuA_1	ecl8_01889	fhuA_1	Ferrichrome outer membrane transporter/phage receptor	c
treA	ecl8_01890	treA	Periplasmic trehalase	c
ecl8_01891	ecl8_01891	ecl8_01891	hypothetical protein	c
ecl8_01892	ecl8_01892	ecl8_01892	hypothetical protein	c
ecl8_01893	ecl8_01893	ecl8_01893	hypothetical protein	c
ecl8_01894	ecl8_01894	ecl8_01894	hypothetical protein	c
ecl8_01895	ecl8_01895	ecl8_01895	hypothetical protein	c
ecl8_01896	ecl8_01896	ecl8_01896	hypothetical protein	c
ecl8_01897	ecl8_01897	ecl8_01897	hypothetical protein	c
ecl8_01898	ecl8_01898	ecl8_01898	hypothetical protein	c
tsaR_2	ecl8_01899	tsaR_2	HTH-type transcriptional regulator TsaR	c
tdcB	ecl8_01900	tdcB	L-threonine dehydratase catabolic TdcB	c
tdcC	ecl8_01901	tdcC	Threonine/serine transporter TdcC	c
tdcD	ecl8_01902	tdcD	Propionate kinase	c
tdcE	ecl8_01903	tdcE	PFL-like enzyme TdcE	c
livJ_2	ecl8_01904	livJ_2	Leu/Ile/Val/Thr-binding protein	c
livH_2	ecl8_01905	livH_2	High-affinity branched-chain amino acid transport system permease protein LivH	c
livH_3	ecl8_01906	livH_3	High-affinity branched-chain amino acid transport system permease protein LivH	c
glnQ_1	ecl8_01907	glnQ_1	Glutamine transport ATP-binding protein GlnQ	c
livF_2	ecl8_01908	livF_2	High-affinity branched-chain amino acid transport ATP-binding protein LivF	c
yjiE	ecl8_01909	yjiE	HTH-type transcriptional regulator YjiE	c
pckA_2	ecl8_01910	pckA_2	Phosphoenolpyruvate carboxykinase (ATP)	c
bltD	ecl8_01911	bltD	Spermine/spermidine acetyltransferase	c
pcpR_1	ecl8_01912	pcpR_1	PCP degradation transcriptional activation protein	c
kgtP_2	ecl8_01913	kgtP_2	Alpha-ketoglutarate permease	c
ais	ecl8_01914	ais	Aconitate isomerase	c
cynR_3	ecl8_01915	cynR_3	HTH-type transcriptional regulator CynR	c
ecl8_01916	ecl8_01916	ecl8_01916	hypothetical protein	c
rluA_1	ecl8_01917	rluA_1	Ribosomal large subunit pseudouridine synthase A	c
ecl8_01918	ecl8_01918	ecl8_01918	hypothetical protein	c
ecl8_01919	ecl8_01919	ecl8_01919	hypothetical protein	c
ecl8_01920	ecl8_01920	ecl8_01920	hypothetical protein	c
ecl8_01921	ecl8_01921	ecl8_01921	hypothetical protein	c
oprF_1	ecl8_01922	oprF_1	Outer membrane porin F	c
vgrG1_1	ecl8_01923	vgrG1_1	Actin cross-linking toxin VgrG1	c
safA	ecl8_01924	safA	SpoIVD-associated factor A	c
ecl8_01925	ecl8_01925	ecl8_01925	hypothetical protein	c
ecl8_01926	ecl8_01926	ecl8_01926	hypothetical protein	c
ecl8_01927	ecl8_01927	ecl8_01927	hypothetical protein	c
ecl8_01928	ecl8_01928	ecl8_01928	hypothetical protein	c
ecl8_01929	ecl8_01929	ecl8_01929	hypothetical protein	c
ecl8_01930	ecl8_01930	ecl8_01930	hypothetical protein	c
ecl8_01931	ecl8_01931	ecl8_01931	hypothetical protein	c
ecl8_01932	ecl8_01932	ecl8_01932	hypothetical protein	c
thpA_1	ecl8_01933	thpA_1	D-threitol-binding protein	c
ecl8_01934	ecl8_01934	ecl8_01934	hypothetical protein	c
ychF	ecl8_01935	ychF	Ribosome-binding ATPase YchF	c
pth	ecl8_01936	pth	Peptidyl-tRNA hydrolase	c
ecl8_01937	ecl8_01937	ecl8_01937	hypothetical protein	c
nolA	ecl8_01938	nolA	Nodulation protein NolA	c
dauA_1	ecl8_01939	dauA_1	C4-dicarboxylic acid transporter DauA	c
prs	ecl8_01940	prs	Ribose-phosphate pyrophosphokinase	c
ispE	ecl8_01941	ispE	4-diphosphocytidyl-2-C-methyl-D-erythritol kinase	c
lolB	ecl8_01942	lolB	Outer-membrane lipoprotein LolB	c
hemA	ecl8_01943	hemA	Glutamyl-tRNA reductase	c
prfA	ecl8_01944	prfA	Peptide chain release factor RF1	c
prmC	ecl8_01945	prmC	Release factor glutamine methyltransferase	c
ychQ	ecl8_01946	ychQ	Protein YchQ	c
ecl8_01947	ecl8_01947	ecl8_01947	hypothetical protein	c
kdsA	ecl8_01948	kdsA	2-dehydro-3-deoxyphosphooctonate aldolase	c
chaA	ecl8_01949	chaA	Sodium-potassium/proton antiporter ChaA	c
chaB	ecl8_01950	chaB	Putative cation transport regulator ChaB	c
chaC	ecl8_01951	chaC	Glutathione-specific gamma-glutamylcyclotransferase	c
ecl8_01952	ecl8_01952	ecl8_01952	hypothetical protein	c
ychN	ecl8_01953	ychN	Protein YchN	c
nasR	ecl8_01954	nasR	Nitrate regulatory protein	c
nrtA	ecl8_01955	nrtA	Nitrate transport protein NrtA	c
cmpB	ecl8_01956	cmpB	Bicarbonate transport system permease protein CmpB	c
cmpC_1	ecl8_01957	cmpC_1	Bicarbonate transport ATP-binding protein CmpC	c
nasD_2	ecl8_01958	nasD_2	Nitrite reductase [NAD(P)H]	c
nasA_1	ecl8_01959	nasA_1	Nitrate reductase	c
nasA_2	ecl8_01960	nasA_2	Nitrate reductase	c
nasA_3	ecl8_01961	nasA_3	Nitrate reductase	c
ecl8_01962	ecl8_01962	ecl8_01962	Invasin	c
narL	ecl8_01963	narL	Nitrate/nitrite response regulator protein NarL	c
narX	ecl8_01964	narX	Nitrate/nitrite sensor protein NarX	c
narK	ecl8_01965	narK	Nitrate/nitrite transporter NarK	c
narG	ecl8_01966	narG	Respiratory nitrate reductase 1 alpha chain	c
narH	ecl8_01967	narH	Respiratory nitrate reductase 1 beta chain	c
narJ	ecl8_01968	narJ	Nitrate reductase molybdenum cofactor assembly chaperone NarJ	c
narI	ecl8_01969	narI	Respiratory nitrate reductase 1 gamma chain	c
ecl8_01970	ecl8_01970	ecl8_01970	hypothetical protein	c
lrpC	ecl8_01971	lrpC	HTH-type transcriptional regulator LrpC	c
ecl8_01972	ecl8_01972	ecl8_01972	tRNA-Tyr	c
ecl8_01973	ecl8_01973	ecl8_01973	tRNA-Tyr	c
purU	ecl8_01974	purU	Formyltetrahydrofolate deformylase	c
ecl8_01975	ecl8_01975	ecl8_01975	hypothetical protein	c
ecl8_01976	ecl8_01976	ecl8_01976	putative NTE family protein	c
rssB	ecl8_01977	rssB	Regulator of RpoS	c
galU	ecl8_01978	galU	UTP--glucose-1-phosphate uridylyltransferase	c
hns_1	ecl8_01979	hns_1	DNA-binding protein H-NS	c
tdk	ecl8_01980	tdk	Thymidine kinase	c
adhE_4	ecl8_01981	adhE_4	Aldehyde-alcohol dehydrogenase	c
ecl8_01982	ecl8_01982	ecl8_01982	hypothetical protein	c
oppA_1	ecl8_01983	oppA_1	Periplasmic oligopeptide-binding protein	c
oppB	ecl8_01984	oppB	Oligopeptide transport system permease protein OppB	c
oppC	ecl8_01985	oppC	Oligopeptide transport system permease protein OppC	c
oppD_3	ecl8_01986	oppD_3	Oligopeptide transport ATP-binding protein OppD	c
oppF_3	ecl8_01987	oppF_3	Oligopeptide transport ATP-binding protein OppF	c
ecl8_01988	ecl8_01988	ecl8_01988	Cyclic nucleotide-gated potassium channel	c
ecl8_01989	ecl8_01989	ecl8_01989	hypothetical protein	c
clsA	ecl8_01990	clsA	Cardiolipin synthase A	c
ecl8_01991	ecl8_01991	ecl8_01991	hypothetical protein	c
yceI	ecl8_01992	yceI	Protein YceI	c
yciI	ecl8_01993	yciI	Protein YciI	c
ecl8_01994	ecl8_01994	ecl8_01994	hypothetical protein	c
ecl8_01995	ecl8_01995	ecl8_01995	hypothetical protein	c
ecl8_01996	ecl8_01996	ecl8_01996	hypothetical protein	c
ecl8_01997	ecl8_01997	ecl8_01997	hypothetical protein	c
ecl8_01998	ecl8_01998	ecl8_01998	hypothetical protein	c
ecl8_01999	ecl8_01999	ecl8_01999	hypothetical protein	c
[truncated: 3,281 more rows]
