# Supplementary material for: Transposon mutagenesis screen in Klebsiella pneumoniae identifies genetic determinants required for growth in human urine and serum
Source: eLife. 2024 Aug 27;12:RP88971. doi: 10.7554/eLife.88971 (PMC11349299; doi:10.7554/eLife.88971)
Supplement: Figure 1—source data 2. [file elife-88971-fig1-data2.xlsx]

## Sheet: 145bp_IFR_CDS_Kleb
Transposon Insertion free regions (IFR) that are significantly large enough to not have occurred by chance (p<0.05) mapped within CDS annotations
												Locus Tag	Gene name	Product	Blast
1	1	2131	IFR1	1	Genbank	CDS	70	1404	dnaA	+	.	ecl8_00001	dnaA	Chromosomal replication initiator protein DnaA
1	1	2131	IFR1	1	Genbank	CDS	1409	2509	dnaN	+	.	ecl8_00002	dnaN	Beta sliding clamp
1	2132	2486	IFR2	1	Genbank	CDS	1409	2509	dnaN	+	.	ecl8_00002	dnaN	Beta sliding clamp
1	3691	4300	IFR3	1	Genbank	CDS	2656	3729	recF	+	.	ecl8_00003	recF_1	DNA replication and repair protein RecF
1	3691	4300	IFR3	1	Genbank	CDS	3758	6172	gyrB	+	.	ecl8_00004	gyrB	DNA gyrase subunit B
1	4301	5836	IFR4	1	Genbank	CDS	3758	6172	gyrB	+	.	ecl8_00004	gyrB	DNA gyrase subunit B
1	5837	6159	IFR5	1	Genbank	CDS	3758	6172	gyrB	+	.	ecl8_00004	gyrB	DNA gyrase subunit B
1	116684	116907	IFR8	1	Genbank	CDS	115577	117697	spoT	-	.	ecl8_00113	spoT	Bifunctional (p)ppGpp synthase/hydrolase SpoT
1	116908	117074	IFR9	1	Genbank	CDS	115577	117697	spoT	-	.	ecl8_00113	spoT	Bifunctional (p)ppGpp synthase/hydrolase SpoT
1	117139	117401	IFR10	1	Genbank	CDS	115577	117697	spoT	-	.	ecl8_00113	spoT	Bifunctional (p)ppGpp synthase/hydrolase SpoT
1	117402	117547	IFR11	1	Genbank	CDS	115577	117697	spoT	-	.	ecl8_00113	spoT	Bifunctional (p)ppGpp synthase/hydrolase SpoT
1	118043	118375	IFR12	1	Genbank	CDS	118046	118669	gmk	-	.	ecl8_00115	gmk	Guanylate kinase
1	118376	118715	IFR13	1	Genbank	CDS	118046	118669	gmk	-	.	ecl8_00115	gmk	Guanylate kinase
1	126105	126316	IFR14	1	Genbank	CDS	126162	127862	ecl8_00122	+	.	ecl8_00122	ecl8_00122	hypothetical protein
1	126673	126825	IFR15	1	Genbank	CDS	126162	127862	ecl8_00122	+	.	ecl8_00122	ecl8_00122	hypothetical protein	lysophospholipid acyltransferase family protein
1	127322	127592	IFR16	1	Genbank	CDS	126162	127862	ecl8_00122	+	.	ecl8_00122	ecl8_00122	hypothetical protein
1	134477	134984	IFR17	1	Genbank	CDS	134467	134925	dut	-	.	ecl8_00130	dut	Deoxyuridine 5'-triphosphate nucleotidohydrolase
1	134477	134984	IFR17	1	Genbank	CDS	134903	136120	coaBC	-	.	ecl8_00131	coaBC	Coenzyme A biosynthesis bifunctional protein CoaBC
1	134985	135567	IFR18	1	Genbank	CDS	134903	136120	coaBC	-	.	ecl8_00131	coaBC	Coenzyme A biosynthesis bifunctional protein CoaBC
1	135568	136123	IFR19	1	Genbank	CDS	134903	136120	coaBC	-	.	ecl8_00131	coaBC	Coenzyme A biosynthesis bifunctional protein CoaBC
1	136998	137424	IFR20	1	Genbank	CDS	137172	137408	rpmB	+	.	ecl8_00133	rpmB	50S ribosomal protein L28
1	138739	139222	IFR21	1	Genbank	CDS	138729	139208	coaD	-	.	ecl8_00136	coaD	Phosphopantetheine adenylyltransferase
1	138739	139222	IFR21	1	Genbank	CDS	139205	139981	ecl8_00137	-	.	ecl8_00137	ecl8_00137	hypothetical protein
1	140006	140854	IFR22	1	Genbank	CDS	139981	141255	waaA	-	.	ecl8_00138	waaA	3-deoxy-D-manno-octulosonic acid transferase
1	140855	141238	IFR23	1	Genbank	CDS	139981	141255	waaA	-	.	ecl8_00138	waaA	3-deoxy-D-manno-octulosonic acid transferase
1	150818	150965	IFR24	1	Genbank	CDS	150111	151073	rfaC	-	.	ecl8_00147	rfaC	Lipopolysaccharide heptosyltransferase 1
1	151688	152112	IFR25	1	Genbank	CDS	151077	152096	rfaF	-	.	ecl8_00148	rfaF	ADP-heptose--LPS heptosyltransferase 2
1	152344	152508	IFR26	1	Genbank	CDS	152145	153077	hldD	-	.	ecl8_00149	hldD	ADP-L-glycero-D-manno-heptose-6-epimerase
1	152509	152700	IFR27	1	Genbank	CDS	152145	153077	hldD	-	.	ecl8_00149	hldD	ADP-L-glycero-D-manno-heptose-6-epimerase
1	161365	161738	IFR28	1	Genbank	CDS	161365	161832	secB	+	.	ecl8_00158	secB	Protein-export protein SecB
1	162963	163296	IFR29	1	Genbank	CDS	162925	163746	cysE	+	.	ecl8_00160	cysE	Serine acetyltransferase
1	163297	163616	IFR30	1	Genbank	CDS	162925	163746	cysE	+	.	ecl8_00160	cysE	Serine acetyltransferase
1	195791	198821	IFR31	1	Genbank	CDS	196774	198843	glyS	+	.	ecl8_00190	glyS	Glycine--tRNA ligase beta subunit
1	195791	198821	IFR31	1	Genbank	CDS	195853	196764	glyQ	+	.	ecl8_00189	glyQ	Glycine--tRNA ligase alpha subunit
1	309389	309616	IFR32	1	Genbank	CDS	309369	309614	tusA	+	.	ecl8_00284	tusA	Sulfur carrier protein TusA
1	314377	315931	IFR33	1	Genbank	CDS	314415	315938	ftsY	+	.	ecl8_00290	ftsY	Signal recognition particle receptor FtsY
1	317931	318769	IFR34	1	Genbank	CDS	317927	318781	rpoH	+	.	ecl8_00293	rpoH	RNA polymerase sigma factor RpoH
1	345562	346667	IFR35	1	Genbank	CDS	345567	346673	asd_1	+	.	ecl8_00318	asd_1	Aspartate-semialdehyde dehydrogenase
1	424837	425217	IFR36	1	Genbank	CDS	424116	424838	dauR	+	.	ecl8_00385	dauR	Transcriptional regulator DauR
1	424837	425217	IFR36	1	Genbank	CDS	424838	425224	tusD	+	.	ecl8_00386	tusD	Sulfurtransferase TusD
1	425227	425586	IFR37	1	Genbank	CDS	425224	425583	tusC	+	.	ecl8_00387	tusC	Protein TusC
1	425597	425816	IFR38	1	Genbank	CDS	425591	425878	tusB	+	.	ecl8_00388	tusB	Protein TusB
1	425923	426931	IFR39	1	Genbank	CDS	426003	426377	rpsL	+	.	ecl8_00389	rpsL	30S ribosomal protein S12
1	425923	426931	IFR39	1	Genbank	CDS	426474	426944	rpsG	+	.	ecl8_00390	rpsG	30S ribosomal protein S7
1	427014	429194	IFR40	1	Genbank	CDS	427041	429155	fusA_1	+	.	ecl8_00391	fusA_1	Elongation factor G
1	431950	432723	IFR41	1	Genbank	CDS	432187	432498	rpsJ	+	.	ecl8_00396	rpsJ	30S ribosomal protein S10
1	431950	432723	IFR41	1	Genbank	CDS	432531	433160	rplC	+	.	ecl8_00397	rplC	50S ribosomal protein L3
1	432724	433372	IFR42	1	Genbank	CDS	432531	433160	rplC	+	.	ecl8_00397	rplC	50S ribosomal protein L3
1	432724	433372	IFR42	1	Genbank	CDS	433171	433776	rplD	+	.	ecl8_00398	rplD	50S ribosomal protein L4
1	433373	434904	IFR43	1	Genbank	CDS	433171	433776	rplD	+	.	ecl8_00398	rplD	50S ribosomal protein L4
1	433373	434904	IFR43	1	Genbank	CDS	433773	434075	rplW	+	.	ecl8_00399	rplW	50S ribosomal protein L23
1	433373	434904	IFR43	1	Genbank	CDS	434093	434914	rplB	+	.	ecl8_00400	rplB	50S ribosomal protein L2
1	435027	437136	IFR44	1	Genbank	CDS	434931	435209	rpsS	+	.	ecl8_00401	rpsS	30S ribosomal protein S19
1	435027	437136	IFR44	1	Genbank	CDS	435224	435556	rplV	+	.	ecl8_00402	rplV	50S ribosomal protein L22
1	435027	437136	IFR44	1	Genbank	CDS	435574	436272	rpsC	+	.	ecl8_00403	rpsC	30S ribosomal protein S3
1	435027	437136	IFR44	1	Genbank	CDS	436285	436695	rplP	+	.	ecl8_00404	rplP	50S ribosomal protein L16
1	435027	437136	IFR44	1	Genbank	CDS	436695	436886	rpmC	+	.	ecl8_00405	rpmC	50S ribosomal protein L29
1	435027	437136	IFR44	1	Genbank	CDS	436886	437140	rpsQ	+	.	ecl8_00406	rpsQ	30S ribosomal protein S17
1	437237	439431	IFR45	1	Genbank	CDS	437306	437677	rplN	+	.	ecl8_00407	rplN	50S ribosomal protein L14
1	437237	439431	IFR45	1	Genbank	CDS	437688	438002	rplX	+	.	ecl8_00408	rplX	50S ribosomal protein L24
1	437237	439431	IFR45	1	Genbank	CDS	438017	438556	rplE	+	.	ecl8_00409	rplE	50S ribosomal protein L5
1	437237	439431	IFR45	1	Genbank	CDS	438571	438876	rpsN	+	.	ecl8_00410	rpsN	30S ribosomal protein S14
1	437237	439431	IFR45	1	Genbank	CDS	438910	439302	rpsH	+	.	ecl8_00411	rpsH	30S ribosomal protein S8
1	437237	439431	IFR45	1	Genbank	CDS	439315	439848	rplF	+	.	ecl8_00412	rplF	50S ribosomal protein L6
1	439506	440030	IFR46	1	Genbank	CDS	439315	439848	rplF	+	.	ecl8_00412	rplF	50S ribosomal protein L6
1	439506	440030	IFR46	1	Genbank	CDS	439858	440211	rplR	+	.	ecl8_00413	rplR	50S ribosomal protein L18
1	440031	440480	IFR47	1	Genbank	CDS	439858	440211	rplR	+	.	ecl8_00413	rplR	50S ribosomal protein L18
1	440031	440480	IFR47	1	Genbank	CDS	440226	440729	rpsE	+	.	ecl8_00414	rpsE	30S ribosomal protein S5
1	440481	441094	IFR48	1	Genbank	CDS	440226	440729	rpsE	+	.	ecl8_00414	rpsE	30S ribosomal protein S5
1	440481	441094	IFR48	1	Genbank	CDS	440733	440912	rpmD	+	.	ecl8_00415	rpmD	50S ribosomal protein L30
1	440481	441094	IFR48	1	Genbank	CDS	440916	441350	rplO	+	.	ecl8_00416	rplO	50S ribosomal protein L15
1	441095	442282	IFR49	1	Genbank	CDS	440916	441350	rplO	+	.	ecl8_00416	rplO	50S ribosomal protein L15
1	441095	442282	IFR49	1	Genbank	CDS	441358	442689	secY	+	.	ecl8_00417	secY	Protein translocase subunit SecY
1	442283	442746	IFR50	1	Genbank	CDS	441358	442689	secY	+	.	ecl8_00417	secY	Protein translocase subunit SecY
1	442878	443230	IFR51	1	Genbank	CDS	442986	443342	rpsM	+	.	ecl8_00418	rpsM	30S ribosomal protein S13
1	443231	445403	IFR52	1	Genbank	CDS	442986	443342	rpsM	+	.	ecl8_00418	rpsM	30S ribosomal protein S13
1	443231	445403	IFR52	1	Genbank	CDS	443782	444402	rpsD	+	.	ecl8_00419	rpsD	30S ribosomal protein S4
1	443231	445403	IFR52	1	Genbank	CDS	444428	445417	rpoA	+	.	ecl8_00420	rpoA	DNA-directed RNA polymerase subunit alpha
1	445404	445801	IFR53	1	Genbank	CDS	444428	445417	rpoA	+	.	ecl8_00420	rpoA	DNA-directed RNA polymerase subunit alpha
1	445404	445801	IFR53	1	Genbank	CDS	445458	445844	rplQ	+	.	ecl8_00421	rplQ	50S ribosomal protein L17
1	451443	452362	IFR54	1	Genbank	CDS	451414	452361	fmt	-	.	ecl8_00429	fmt	Methionyl-tRNA formyltransferase
1	455180	455713	IFR55	1	Genbank	CDS	455157	455729	tsaC	+	.	ecl8_00434	tsaC	Threonylcarbamoyl-AMP synthase
1	473530	475187	IFR56	1	Genbank	CDS	473538	474887	accC_1	-	.	ecl8_00452	accC_1	Biotin carboxylase
1	473530	475187	IFR56	1	Genbank	CDS	474898	475365	accB_1	-	.	ecl8_00453	accB_1	Biotin carboxyl carrier protein of acetyl-CoA carboxylase
1	475188	475449	IFR57	1	Genbank	CDS	475388	475840	aroQ	-	.	ecl8_00454	aroQ	3-dehydroquinate dehydratase
1	475188	475449	IFR57	1	Genbank	CDS	474898	475365	accB_1	-	.	ecl8_00453	accB_1	Biotin carboxyl carrier protein of acetyl-CoA carboxylase
1	475739	475986	IFR58	1	Genbank	CDS	475388	475840	aroQ	-	.	ecl8_00454	aroQ	3-dehydroquinate dehydratase
1	480318	480732	IFR59	1	Genbank	CDS	480420	481463	mreB	+	.	ecl8_00458	mreB	Rod shape-determining protein MreB
1	480863	481369	IFR60	1	Genbank	CDS	480420	481463	mreB	+	.	ecl8_00458	mreB	Rod shape-determining protein MreB
1	481530	482066	IFR61	1	Genbank	CDS	481534	482526	mreC	+	.	ecl8_00459	mreC	Cell shape-determining protein MreC
1	482067	482400	IFR62	1	Genbank	CDS	481534	482526	mreC	+	.	ecl8_00459	mreC	Cell shape-determining protein MreC
1	482508	482964	IFR63	1	Genbank	CDS	481534	482526	mreC	+	.	ecl8_00459	mreC	Cell shape-determining protein MreC
1	482508	482964	IFR63	1	Genbank	CDS	482526	483014	mreD	+	.	ecl8_00460	mreD	Rod shape-determining protein MreD
1	502526	503165	IFR64	1	Genbank	CDS	502696	503124	rplM	+	.	ecl8_00478	rplM	50S ribosomal protein L13
1	502526	503165	IFR64	1	Genbank	CDS	503140	503532	rpsI	+	.	ecl8_00479	rpsI	30S ribosomal protein S9
1	503166	503422	IFR65	1	Genbank	CDS	503140	503532	rpsI	+	.	ecl8_00479	rpsI	30S ribosomal protein S9
1	524838	525601	IFR66	1	Genbank	CDS	524834	525559	lptB_2	-	.	ecl8_00497	lptB_2	Lipopolysaccharide export system ATP-binding protein LptB
1	524838	525601	IFR66	1	Genbank	CDS	525566	526111	lptA	-	.	ecl8_00498	lptA	Lipopolysaccharide export system protein LptA
1	525625	526279	IFR67	1	Genbank	CDS	525566	526111	lptA	-	.	ecl8_00498	lptA	Lipopolysaccharide export system protein LptA
1	525625	526279	IFR67	1	Genbank	CDS	526080	526655	lptC	-	.	ecl8_00499	lptC	Lipopolysaccharide export system protein LptC
1	526280	526673	IFR68	1	Genbank	CDS	526080	526655	lptC	-	.	ecl8_00499	lptC	Lipopolysaccharide export system protein LptC
1	526280	526673	IFR68	1	Genbank	CDS	526652	527218	kdsC	-	.	ecl8_00500	kdsC	3-deoxy-D-manno-octulosonate 8-phosphate phosphatase KdsC
1	532947	534211	IFR69	1	Genbank	CDS	532968	534227	murA	+	.	ecl8_00509	murA	UDP-N-acetylglucosamine 1-carboxyvinyltransferase
1	534794	535757	IFR70	1	Genbank	CDS	534754	535725	ispB	-	.	ecl8_00511	ispB	Octaprenyl diphosphate synthase
1	535894	536593	IFR71	1	Genbank	CDS	535986	536297	rplU	+	.	ecl8_00512	rplU	50S ribosomal protein L21
1	535894	536593	IFR71	1	Genbank	CDS	536318	536575	rpmA	+	.	ecl8_00513	rpmA	50S ribosomal protein L27
1	537652	537981	IFR72	1	Genbank	CDS	537650	538828	obgE	+	.	ecl8_00515	obgE	GTPase ObgE/CgtA
1	537982	538620	IFR73	1	Genbank	CDS	537650	538828	obgE	+	.	ecl8_00515	obgE	GTPase ObgE/CgtA
1	542293	544139	IFR74	1	Genbank	CDS	542315	544258	ftsH_1	+	.	ecl8_00520	ftsH_1	ATP-dependent zinc metalloprotease FtsH
1	544364	545144	IFR75	1	Genbank	CDS	544352	545200	folP	+	.	ecl8_00521	folP	Dihydropteroate synthase
1	545189	546267	IFR76	1	Genbank	CDS	544352	545200	folP	+	.	ecl8_00521	folP	Dihydropteroate synthase
1	545189	546267	IFR76	1	Genbank	CDS	545193	546530	glmM	+	.	ecl8_00522	glmM	Phosphoglucosamine mutase
1	546268	546499	IFR77	1	Genbank	CDS	545193	546530	glmM	+	.	ecl8_00522	glmM	Phosphoglucosamine mutase
1	551856	552924	IFR78	1	Genbank	CDS	551440	551862	rimP	+	.	ecl8_00530	rimP	Ribosome maturation factor RimP
1	551856	552924	IFR78	1	Genbank	CDS	551890	553377	nusA	+	.	ecl8_00531	nusA	Transcription termination/antitermination protein NusA
1	553400	553605	IFR79	1	Genbank	CDS	553402	556092	infB	+	.	ecl8_00532	infB	Translation initiation factor IF-2
1	553870	555040	IFR80	1	Genbank	CDS	553402	556092	infB	+	.	ecl8_00532	infB	Translation initiation factor IF-2
1	555041	556044	IFR81	1	Genbank	CDS	553402	556092	infB	+	.	ecl8_00532	infB	Translation initiation factor IF-2
1	557581	557915	IFR82	1	Genbank	CDS	557689	557958	rpsO	+	.	ecl8_00535	rpsO	30S ribosomal protein S15
1	589145	589300	IFR84	1	Genbank	CDS	588825	589217	yqjF	-	.	ecl8_00568	yqjF	Inner membrane protein YqjF
1	630775	631012	IFR85	1	Genbank	CDS	631002	631778	yqjH	+	.	ecl8_00606	yqjH	NADPH-dependent ferric-chelate reductase
1	657034	658902	IFR87	1	Genbank	CDS	657012	658853	rpoD	-	.	ecl8_00631	rpoD	RNA polymerase sigma factor RpoD
1	659109	660812	IFR88	1	Genbank	CDS	659072	660817	dnaG	-	.	ecl8_00632	dnaG	DNA primase
1	661385	662356	IFR89	1	Genbank	CDS	661382	662395	tsaD	+	.	ecl8_00634	tsaD	tRNA N6-adenosine threonylcarbamoyltransferase
1	670277	670605	IFR90	1	Genbank	CDS	670274	670657	folB	+	.	ecl8_00644	folB	Dihydroneopterin aldolase
1	671726	672160	IFR91	1	Genbank	CDS	671689	672930	cca	-	.	ecl8_00646	cca	Multifunctional CCA protein
1	672161	672916	IFR92	1	Genbank	CDS	671689	672930	cca	-	.	ecl8_00646	cca	Multifunctional CCA protein
1	678041	678351	IFR93	1	Genbank	CDS	678042	679475	hldE	+	.	ecl8_00650	hldE	Bifunctional protein HldE
1	678496	678669	IFR94	1	Genbank	CDS	678042	679475	hldE	+	.	ecl8_00650	hldE	Bifunctional protein HldE
1	678697	678885	IFR95	1	Genbank	CDS	678042	679475	hldE	+	.	ecl8_00650	hldE	Bifunctional protein HldE
1	678899	679095	IFR96	1	Genbank	CDS	678042	679475	hldE	+	.	ecl8_00650	hldE	Bifunctional protein HldE
1	680515	681214	IFR98	1	Genbank	CDS	680577	681230	ribB	+	.	ecl8_00653	ribB	3,4-dihydroxy-2-butanone 4-phosphate synthase
1	689042	690609	IFR99	1	Genbank	CDS	688662	689237	ecl8_00662	+	.	ecl8_00662	ecl8_00662	hypothetical protein
1	689042	690609	IFR99	1	Genbank	CDS	689268	691163	parE	+	.	ecl8_00663	parE	DNA topoisomerase 4 subunit B
1	690610	690875	IFR100	1	Genbank	CDS	689268	691163	parE	+	.	ecl8_00663	parE	DNA topoisomerase 4 subunit B
1	690876	691122	IFR101	1	Genbank	CDS	689268	691163	parE	+	.	ecl8_00663	parE	DNA topoisomerase 4 subunit B
1	695923	696913	IFR102	1	Genbank	CDS	695933	698191	parC	+	.	ecl8_00670	parC	DNA topoisomerase 4 subunit A
1	696914	697574	IFR103	1	Genbank	CDS	695933	698191	parC	+	.	ecl8_00670	parC	DNA topoisomerase 4 subunit A
1	697575	698124	IFR104	1	Genbank	CDS	695933	698191	parC	+	.	ecl8_00670	parC	DNA topoisomerase 4 subunit A
1	698362	699138	IFR105	1	Genbank	CDS	698383	699120	plsC	+	.	ecl8_00671	plsC	1-acyl-sn-glycerol-3-phosphate acyltransferase
1	753446	753831	IFR107	1	Genbank	CDS	753418	753834	yqgF	-	.	ecl8_00728	yqgF	Putative pre-16S rRNA nuclease
1	759552	759786	IFR108	1	Genbank	CDS	759524	760678	metK	-	.	ecl8_00735	metK	S-adenosylmethionine synthase
1	759787	760763	IFR109	1	Genbank	CDS	759524	760678	metK	-	.	ecl8_00735	metK	S-adenosylmethionine synthase
1	766672	766822	IFR110	1	Genbank	CDS	766148	768139	tktA_1	+	.	ecl8_00739	tktA_1	Transketolase 1
1	769548	770729	IFR111	1	Genbank	CDS	768524	769552	epd	+	.	ecl8_00740	epd	D-erythrose-4-phosphate dehydrogenase
1	769548	770729	IFR111	1	Genbank	CDS	769592	770755	pgk	+	.	ecl8_00741	pgk	Phosphoglycerate kinase
1	770836	771635	IFR112	1	Genbank	CDS	770853	771932	fbaA_1	+	.	ecl8_00742	fbaA_1	Fructose-bisphosphate aldolase class 2
1	771636	771924	IFR113	1	Genbank	CDS	770853	771932	fbaA_1	+	.	ecl8_00742	fbaA_1	Fructose-bisphosphate aldolase class 2
1	781369	781543	IFR114	1	Genbank	CDS	781315	782493	ubiH	+	.	ecl8_00753	ubiH	2-octaprenyl-6-methoxyphenol hydroxylase
1	781544	781744	IFR115	1	Genbank	CDS	781315	782493	ubiH	+	.	ecl8_00753	ubiH	2-octaprenyl-6-methoxyphenol hydroxylase
1	796970	797352	IFR116	1	Genbank	CDS	796854	797837	ygfZ	-	.	ecl8_00767	ygfZ	tRNA-modifying protein YgfZ
1	797353	797832	IFR117	1	Genbank	CDS	796854	797837	ygfZ	-	.	ecl8_00767	ygfZ	tRNA-modifying protein YgfZ
1	802755	803213	IFR118	1	Genbank	CDS	802962	803924	prfB	+	.	ecl8_00774	prfB	Peptide chain release factor RF2
1	803214	805490	IFR119	1	Genbank	CDS	802962	803924	prfB	+	.	ecl8_00774	prfB	Peptide chain release factor RF2
1	803214	805490	IFR119	1	Genbank	CDS	803934	805451	lysS	+	.	ecl8_00775	lysS	Lysine--tRNA ligase
1	848832	848982	IFR124	1	Genbank	CDS	848309	848935	ecl8_00815	-	.	ecl8_00815	ecl8_00815	hypothetical protein
1	928823	929765	IFR125	1	Genbank	CDS	928924	929799	lgt	+	.	ecl8_00891	lgt	Prolipoprotein diacylglyceryl transferase
1	929778	929934	IFR126	1	Genbank	CDS	928924	929799	lgt	+	.	ecl8_00891	lgt	Prolipoprotein diacylglyceryl transferase
1	929778	929934	IFR126	1	Genbank	CDS	929806	930600	thyA	+	.	ecl8_00892	thyA	Thymidylate synthase
1	929935	930594	IFR127	1	Genbank	CDS	929806	930600	thyA	+	.	ecl8_00892	thyA	Thymidylate synthase
1	935071	935285	IFR128	1	Genbank	CDS	932616	935993	recC	+	.	ecl8_00897	recC	RecBCD enzyme subunit RecC
1	976440	976597	IFR130	1	Genbank	CDS	975728	976453	cbiH	+	.	ecl8_00937	cbiH	putative cobalt-factor III C(17)-methyltransferase
1	976440	976597	IFR130	1	Genbank	CDS	976450	977235	cbiJ	+	.	ecl8_00938	cbiJ	Cobalt-precorrin-6A reductase
1	1035898	1037599	IFR132	1	Genbank	CDS	1035948	1037585	pyrG_1	+	.	ecl8_00994	pyrG_1	CTP synthase
1	1037664	1038106	IFR133	1	Genbank	CDS	1037667	1038965	eno	+	.	ecl8_00995	eno	Enolase
1	1038223	1038913	IFR134	1	Genbank	CDS	1037667	1038965	eno	+	.	ecl8_00995	eno	Enolase
1	1052603	1052856	IFR136	1	Genbank	CDS	1052601	1052918	ftsB	+	.	ecl8_01008	ftsB	Cell division protein FtsB
1	1052937	1053144	IFR137	1	Genbank	CDS	1052938	1053648	ispD	+	.	ecl8_01009	ispD	2-C-methyl-D-erythritol 4-phosphate cytidylyltransferase
1	1053145	1053622	IFR138	1	Genbank	CDS	1052938	1053648	ispD	+	.	ecl8_01009	ispD	2-C-methyl-D-erythritol 4-phosphate cytidylyltransferase
1	1053652	1054108	IFR139	1	Genbank	CDS	1053648	1054127	ispF	+	.	ecl8_01010	ispF	2-C-methyl-D-erythritol 2,4-cyclodiphosphate synthase
1	1072404	1072563	IFR140	1	Genbank	CDS	1072278	1073405	ecl8_01029	-	.	ecl8_01029	ecl8_01029	hypothetical protein	HNH endonuclease?
1	1072567	1072739	IFR141	1	Genbank	CDS	1072278	1073405	ecl8_01029	-	.	ecl8_01029	ecl8_01029	hypothetical protein
1	1072745	1073019	IFR142	1	Genbank	CDS	1072278	1073405	ecl8_01029	-	.	ecl8_01029	ecl8_01029	hypothetical protein
1	1073350	1073666	IFR143	1	Genbank	CDS	1072278	1073405	ecl8_01029	-	.	ecl8_01029	ecl8_01029	hypothetical protein
1	1077563	1077901	IFR145	1	Genbank	CDS	1077614	1078591	ecl8_01033	-	.	ecl8_01033	ecl8_01033	hypothetical protein
1	1078494	1078643	IFR146	1	Genbank	CDS	1077614	1078591	ecl8_01033	-	.	ecl8_01033	ecl8_01033	hypothetical protein
1	1078655	1078807	IFR147	1	Genbank	CDS	1078733	1081222	ecl8_01034	-	.	ecl8_01034	ecl8_01034	hypothetical protein
1	1082526	1082735	IFR148	1	Genbank	CDS	1082584	1082754	ecl8_01036	+	.	ecl8_01036	ecl8_01036	hypothetical protein
1	1092958	1093167	IFR149	1	Genbank	CDS	1092074	1093015	ecl8_01045	-	.	ecl8_01045	ecl8_01045	hypothetical protein
1	1146611	1146758	IFR150	1	Genbank	CDS	1145685	1146743	recA	+	.	ecl8_01098	recA	Protein RecA
1	1147389	1148387	IFR151	1	Genbank	CDS	1147562	1150189	alaS	+	.	ecl8_01100	alaS	Alanine--tRNA ligase
1	1148388	1150183	IFR152	1	Genbank	CDS	1147562	1150189	alaS	+	.	ecl8_01100	alaS	Alanine--tRNA ligase
1	1150537	1150716	IFR153	1	Genbank	CDS	1150553	1150738	csrA	+	.	ecl8_01101	csrA	Carbon storage regulator
1	1214662	1214855	IFR154	1	Genbank	CDS	1214399	1215460	ecl8_01168	+	.	ecl8_01168	ecl8_01168	hypothetical protein
1	1215409	1215666	IFR155	1	Genbank	CDS	1214399	1215460	ecl8_01168	+	.	ecl8_01168	ecl8_01168	hypothetical protein
1	1215409	1215666	IFR155	1	Genbank	CDS	1215508	1217466	ecl8_01169	-	.	ecl8_01169	ecl8_01169	hypothetical protein
1	1215667	1215838	IFR156	1	Genbank	CDS	1215508	1217466	ecl8_01169	-	.	ecl8_01169	ecl8_01169	hypothetical protein
1	1215839	1216112	IFR157	1	Genbank	CDS	1215508	1217466	ecl8_01169	-	.	ecl8_01169	ecl8_01169	hypothetical protein
1	1216113	1216495	IFR158	1	Genbank	CDS	1215508	1217466	ecl8_01169	-	.	ecl8_01169	ecl8_01169	hypothetical protein
1	1216496	1216954	IFR159	1	Genbank	CDS	1215508	1217466	ecl8_01169	-	.	ecl8_01169	ecl8_01169	hypothetical protein
1	1217123	1217283	IFR160	1	Genbank	CDS	1215508	1217466	ecl8_01169	-	.	ecl8_01169	ecl8_01169	hypothetical protein
1	1222922	1223822	IFR161	1	Genbank	CDS	1222934	1223812	nadK	-	.	ecl8_01178	nadK	NAD kinase
1	1224029	1224438	IFR162	1	Genbank	CDS	1223937	1224527	grpE	+	.	ecl8_01179	grpE	Protein GrpE
1	1226845	1227356	IFR163	1	Genbank	CDS	1226908	1228272	ffh	+	.	ecl8_01182	ffh	Signal recognition particle protein
1	1227357	1228231	IFR164	1	Genbank	CDS	1226908	1228272	ffh	+	.	ecl8_01182	ffh	Signal recognition particle protein
1	1228423	1228805	IFR165	1	Genbank	CDS	1228532	1228780	rpsP	+	.	ecl8_01183	rpsP	30S ribosomal protein S16
1	1228423	1228805	IFR165	1	Genbank	CDS	1228799	1229347	rimM	+	.	ecl8_01184	rimM	Ribosome maturation factor RimM
1	1228806	1229378	IFR166	1	Genbank	CDS	1228799	1229347	rimM	+	.	ecl8_01184	rimM	Ribosome maturation factor RimM
1	1229379	1230094	IFR167	1	Genbank	CDS	1229379	1230146	trmD	+	.	ecl8_01185	trmD	tRNA (guanine-N(1)-)-methyltransferase
1	1230135	1230505	IFR168	1	Genbank	CDS	1229379	1230146	trmD	+	.	ecl8_01185	trmD	tRNA (guanine-N(1)-)-methyltransferase
1	1230135	1230505	IFR168	1	Genbank	CDS	1230186	1230533	rplS	+	.	ecl8_01186	rplS	50S ribosomal protein L19
1	1232124	1232291	IFR169	1	Genbank	CDS	1231168	1232538	ecl8_01188	+	.	ecl8_01188	ecl8_01188	hypothetical protein
1	1240335	1241014	IFR170	1	Genbank	CDS	1240265	1241002	bamD	-	.	ecl8_01197	bamD	Outer membrane protein assembly factor BamD
1	1253201	1253658	IFR171	1	Genbank	CDS	1253216	1254571	pssA	-	.	ecl8_01207	pssA	CDP-diacylglycerol--serine O-phosphatidyltransferase
1	1253659	1254273	IFR172	1	Genbank	CDS	1253216	1254571	pssA	-	.	ecl8_01207	pssA	CDP-diacylglycerol--serine O-phosphatidyltransferase
1	1254274	1254613	IFR173	1	Genbank	CDS	1253216	1254571	pssA	-	.	ecl8_01207	pssA	CDP-diacylglycerol--serine O-phosphatidyltransferase
1	1270259	1271160	IFR174	1	Genbank	CDS	1270264	1271238	lepB	+	.	ecl8_01222	lepB	Signal peptidase I
1	1271557	1272135	IFR175	1	Genbank	CDS	1271488	1272168	rnc	+	.	ecl8_01223	rnc	Ribonuclease 3
1	1272136	1272990	IFR176	1	Genbank	CDS	1271488	1272168	rnc	+	.	ecl8_01223	rnc	Ribonuclease 3
1	1272136	1272990	IFR176	1	Genbank	CDS	1272165	1273070	era	+	.	ecl8_01224	era	GTPase Era
1	1273836	1274019	IFR177	1	Genbank	CDS	1273831	1274562	pdxJ	+	.	ecl8_01226	pdxJ	Pyridoxine 5'-phosphate synthase
1	1274020	1274342	IFR178	1	Genbank	CDS	1273831	1274562	pdxJ	+	.	ecl8_01226	pdxJ	Pyridoxine 5'-phosphate synthase
1	1274507	1274985	IFR179	1	Genbank	CDS	1273831	1274562	pdxJ	+	.	ecl8_01226	pdxJ	Pyridoxine 5'-phosphate synthase
1	1274507	1274985	IFR179	1	Genbank	CDS	1274562	1274942	acpS	+	.	ecl8_01227	acpS	Holo-[acyl-carrier-protein] synthase
1	1274507	1274985	IFR179	1	Genbank	CDS	1274955	1275215	yfhL	-	.	ecl8_01228	yfhL	Ferredoxin YfhL
1	1277331	1277501	IFR180	1	Genbank	CDS	1277031	1277540	tadA	+	.	ecl8_01231	tadA	tRNA-specific adenosine deaminase
1	1289199	1290320	IFR181	1	Genbank	CDS	1289263	1290516	glyA1	+	.	ecl8_01239	glyA1	Serine hydroxymethyltransferase 1
1	1290321	1290504	IFR182	1	Genbank	CDS	1289263	1290516	glyA1	+	.	ecl8_01239	glyA1	Serine hydroxymethyltransferase 1
1	1303259	1304047	IFR183	1	Genbank	CDS	1303201	1304004	suhB_1	-	.	ecl8_01251	suhB_1	Inositol-1-monophosphatase
1	1305847	1306284	IFR184	1	Genbank	CDS	1305764	1306978	iscS	+	.	ecl8_01254	iscS	Cysteine desulfurase IscS
1	1306285	1306701	IFR185	1	Genbank	CDS	1305764	1306978	iscS	+	.	ecl8_01254	iscS	Cysteine desulfurase IscS
1	1306721	1306928	IFR186	1	Genbank	CDS	1305764	1306978	iscS	+	.	ecl8_01254	iscS	Cysteine desulfurase IscS
1	1307262	1307412	IFR187	1	Genbank	CDS	1307005	1307391	iscU	+	.	ecl8_01255	iscU	Iron-sulfur cluster assembly scaffold protein IscU
1	1307262	1307412	IFR187	1	Genbank	CDS	1307409	1307732	iscA	+	.	ecl8_01256	iscA	Iron-binding protein IscA
1	1308639	1308792	IFR188	1	Genbank	CDS	1308338	1310188	hscA	+	.	ecl8_01258	hscA	Chaperone protein HscA
1	1309123	1309421	IFR189	1	Genbank	CDS	1308338	1310188	hscA	+	.	ecl8_01258	hscA	Chaperone protein HscA
1	1326655	1327762	IFR190	1	Genbank	CDS	1326667	1327788	ispG	+	.	ecl8_01271	ispG	4-hydroxy-3-methylbut-2-en-1-yl diphosphate synthase (flavodoxin)
1	1327820	1328785	IFR191	1	Genbank	CDS	1327880	1329154	hisS	+	.	ecl8_01272	hisS	Histidine--tRNA ligase
1	1328786	1329142	IFR192	1	Genbank	CDS	1327880	1329154	hisS	+	.	ecl8_01272	hisS	Histidine--tRNA ligase
1	1331028	1332571	IFR193	1	Genbank	CDS	1331112	1332590	der	+	.	ecl8_01275	der	GTPase Der
1	1357589	1358285	IFR194	1	Genbank	CDS	1357660	1358337	hda	+	.	ecl8_01295	hda	DnaA regulatory inactivator Hda
1	1363675	1364629	IFR195	1	Genbank	CDS	1363745	1364623	dapA_1	+	.	ecl8_01302	dapA_1	4-hydroxy-tetrahydrodipicolinate synthase
1	1370679	1371785	IFR196	1	Genbank	CDS	1370663	1371790	dapE	-	.	ecl8_01309	dapE	Succinyl-diaminopimelate desuccinylase
1	1418713	1419720	IFR197	1	Genbank	CDS	1418718	1419779	zipA	+	.	ecl8_01355	zipA	Cell division protein ZipA
1	1419851	1420164	IFR198	1	Genbank	CDS	1419849	1421864	ligA	+	.	ecl8_01356	ligA	DNA ligase
1	1420165	1421867	IFR199	1	Genbank	CDS	1419849	1421864	ligA	+	.	ecl8_01356	ligA	DNA ligase
1	1420165	1421867	IFR199	1	Genbank	CDS	1421866	1422084	ecl8_01357	+	.	ecl8_01357	ecl8_01357	hypothetical protein
1	1424761	1426227	IFR200	1	Genbank	CDS	1424837	1426255	gltX	+	.	ecl8_01364	gltX	Glutamate--tRNA ligase
1	1427714	1427917	IFR201	1	Genbank	CDS	1427678	1429849	pdeA	+	.	ecl8_01369	pdeA	putative cyclic di-GMP phosphodiesterase PdeA
1	1446629	1446815	IFR203	1	Genbank	CDS	1445805	1446686	ecl8_01383	-	.	ecl8_01383	ecl8_01383	hypothetical protein
1	1450152	1450307	IFR204	1	Genbank	CDS	1449330	1450160	ecl8_01387	+	.	ecl8_01387	ecl8_01387	hypothetical protein
1	1453994	1454236	IFR205	1	Genbank	CDS	1453987	1454247	lexA_1	-	.	ecl8_01395	lexA_1	LexA repressor
1	1454237	1454677	IFR206	1	Genbank	CDS	1453987	1454247	lexA_1	-	.	ecl8_01395	lexA_1	LexA repressor
1	1474513	1474664	IFR207	1	Genbank	CDS	1474198	1476744	ecl8_01428	+	.	ecl8_01428	ecl8_01428	hypothetical protein
1	1474676	1474893	IFR208	1	Genbank	CDS	1474198	1476744	ecl8_01428	+	.	ecl8_01428	ecl8_01428	hypothetical protein
1	1475375	1475620	IFR209	1	Genbank	CDS	1474198	1476744	ecl8_01428	+	.	ecl8_01428	ecl8_01428	hypothetical protein
1	1475651	1475939	IFR210	1	Genbank	CDS	1474198	1476744	ecl8_01428	+	.	ecl8_01428	ecl8_01428	hypothetical protein
1	1501781	1502760	IFR211	1	Genbank	CDS	1501796	1503016	fabB	+	.	ecl8_01454	fabB	3-oxoacyl-[acyl-carrier-protein] synthase 1
1	1502761	1503009	IFR212	1	Genbank	CDS	1501796	1503016	fabB	+	.	ecl8_01454	fabB	3-oxoacyl-[acyl-carrier-protein] synthase 1
1	1507312	1507486	IFR213	1	Genbank	CDS	1506776	1507789	usg	+	.	ecl8_01458	usg	USG-1 protein
1	1509459	1509723	IFR214	1	Genbank	CDS	1509411	1510394	accD	+	.	ecl8_01461	accD	Acetyl-coenzyme A carboxylase carboxyl transferase subunit beta
1	1509724	1510373	IFR215	1	Genbank	CDS	1509411	1510394	accD	+	.	ecl8_01461	accD	Acetyl-coenzyme A carboxylase carboxyl transferase subunit beta
1	1510469	1511685	IFR216	1	Genbank	CDS	1510470	1511738	folC	+	.	ecl8_01462	folC	Dihydrofolate synthase/folylpolyglutamate synthase
1	1514380	1514535	IFR217	1	Genbank	CDS	1513156	1514673	purF	+	.	ecl8_01465	purF	Amidophosphoribosyltransferase
1	1519650	1519816	IFR218	1	Genbank	CDS	1518970	1519743	hisP	+	.	ecl8_01471	hisP	Histidine transport ATP-binding protein HisP
1	1519650	1519816	IFR218	1	Genbank	CDS	1519749	1520276	ecl8_01472	-	.	ecl8_01472	ecl8_01472	hypothetical protein	GNAT family N-acetyltransferase
1	1575636	1576805	IFR219	1	Genbank	CDS	1575414	1575668	ascD	-	.	ecl8_01523	ascD	CDP-6-deoxy-L-threo-D-glycero-4-hexulose-3- dehydrase reductase
1	1575636	1576805	IFR219	1	Genbank	CDS	1575668	1576798	nrdB	-	.	ecl8_01524	nrdB	Ribonucleoside-diphosphate reductase 1 subunit beta
1	1576967	1579407	IFR220	1	Genbank	CDS	1576900	1579185	nrdA	-	.	ecl8_01525	nrdA	Ribonucleoside-diphosphate reductase 1 subunit alpha
1	1579595	1579845	IFR221	1	Genbank	CDS	1579529	1580257	ubiG	-	.	ecl8_01526	ubiG	Ubiquinone biosynthesis O-methyltransferase
1	1579975	1580151	IFR222	1	Genbank	CDS	1579529	1580257	ubiG	-	.	ecl8_01526	ubiG	Ubiquinone biosynthesis O-methyltransferase
1	1580352	1580934	IFR223	1	Genbank	CDS	1580404	1583040	gyrA	+	.	ecl8_01527	gyrA	DNA gyrase subunit A
1	1580935	1582906	IFR224	1	Genbank	CDS	1580404	1583040	gyrA	+	.	ecl8_01527	gyrA	DNA gyrase subunit A
1	1611400	1611974	IFR226	1	Genbank	CDS	1610197	1611957	yejM	-	.	ecl8_01548	yejM	Inner membrane protein YejM
1	1617171	1617579	IFR227	1	Genbank	CDS	1617213	1617497	rplY	-	.	ecl8_01555	rplY	50S ribosomal protein L25
1	1653083	1653743	IFR228	1	Genbank	CDS	1653095	1653763	folE	+	.	ecl8_01584	folE	GTP cyclohydrolase 1
1	1687221	1687380	IFR229	1	Genbank	CDS	1687180	1689222	metG	-	.	ecl8_01614	metG	Methionine--tRNA ligase
1	1687598	1688384	IFR230	1	Genbank	CDS	1687180	1689222	metG	-	.	ecl8_01614	metG	Methionine--tRNA ligase
1	1688385	1689264	IFR231	1	Genbank	CDS	1687180	1689222	metG	-	.	ecl8_01614	metG	Methionine--tRNA ligase
1	1701928	1702109	IFR232	1	Genbank	CDS	1701422	1703029	araB_1	-	.	ecl8_01627	araB_1	Ribulokinase
1	1705233	1705379	IFR233	1	Genbank	CDS	1705084	1706025	lsrR_2	-	.	ecl8_01630	lsrR_2	Transcriptional regulator LsrR
1	1828847	1829105	IFR237	1	Genbank	CDS	1829044	1829733	ecl8_01735	-	.	ecl8_01735	ecl8_01735	hypothetical protein
1	1829106	1829490	IFR238	1	Genbank	CDS	1829044	1829733	ecl8_01735	-	.	ecl8_01735	ecl8_01735	hypothetical protein
1	1829511	1829754	IFR239	1	Genbank	CDS	1829044	1829733	ecl8_01735	-	.	ecl8_01735	ecl8_01735	hypothetical protein
1	1877572	1878085	IFR242	1	Genbank	CDS	1877577	1878125	pgsA	+	.	ecl8_01782	pgsA	CDP-diacylglycerol--glycerol-3-phosphate 3-phosphatidyltransferase
1	1878122	1878274	IFR243	1	Genbank	CDS	1877577	1878125	pgsA	+	.	ecl8_01782	pgsA	CDP-diacylglycerol--glycerol-3-phosphate 3-phosphatidyltransferase
1	1898273	1900091	IFR246	1	Genbank	CDS	1898289	1900022	argS	-	.	ecl8_01804	argS	Arginine--tRNA ligase
1	1905502	1906953	IFR247	1	Genbank	CDS	1905610	1907397	aspS	+	.	ecl8_01812	aspS	Aspartate--tRNA ligase
1	1906954	1907336	IFR248	1	Genbank	CDS	1905610	1907397	aspS	+	.	ecl8_01812	aspS	Aspartate--tRNA ligase
1	1908910	1909075	IFR249	1	Genbank	CDS	1908645	1909166	ruvC	+	.	ecl8_01815	ruvC	Crossover junction endodeoxyribonuclease RuvC
1	1909638	1909848	IFR250	1	Genbank	CDS	1909246	1909857	ruvA	+	.	ecl8_01816	ruvA	Holliday junction ATP-dependent DNA helicase RuvA
1	1909858	1910047	IFR251	1	Genbank	CDS	1909866	1910876	ruvB	+	.	ecl8_01817	ruvB	Holliday junction ATP-dependent DNA helicase RuvB
1	1910254	1910643	IFR252	1	Genbank	CDS	1909866	1910876	ruvB	+	.	ecl8_01817	ruvB	Holliday junction ATP-dependent DNA helicase RuvB
1	1910644	1910835	IFR253	1	Genbank	CDS	1909866	1910876	ruvB	+	.	ecl8_01817	ruvB	Holliday junction ATP-dependent DNA helicase RuvB
1	1957475	1957693	IFR254	1	Genbank	CDS	1957041	1958618	pdeD	-	.	ecl8_01862	pdeD	putative cyclic di-GMP phosphodiesterase PdeD
1	1965041	1965422	IFR255	1	Genbank	CDS	1965072	1965767	tsaB	+	.	ecl8_01869	tsaB	tRNA threonylcarbamoyladenosine biosynthesis protein TsaB
1	1965423	1965724	IFR256	1	Genbank	CDS	1965072	1965767	tsaB	+	.	ecl8_01869	tsaB	tRNA threonylcarbamoyladenosine biosynthesis protein TsaB
1	1969593	1969826	IFR257	1	Genbank	CDS	1969553	1969822	minE	-	.	ecl8_01873	minE	Cell division topological specificity factor
1	1969593	1969826	IFR257	1	Genbank	CDS	1969826	1970638	minD	-	.	ecl8_01874	minD	Septum site-determining protein MinD
1	1981996	1982149	IFR258	1	Genbank	CDS	1980989	1982722	cvrA	-	.	ecl8_01886	cvrA	K(+)/H(+) antiporter NhaP2
1	1990545	1990734	IFR259	1	Genbank	CDS	1990493	1991422	ecl8_01892	+	.	ecl8_01892	ecl8_01892	hypothetical protein
1	1998545	1998697	IFR260	1	Genbank	CDS	1998506	1999495	tdcB	+	.	ecl8_01900	tdcB	L-threonine dehydratase catabolic TdcB
1	2024621	2024775	IFR262	1	Genbank	CDS	2024746	2027373	vgrG1_1	+	.	ecl8_01923	vgrG1_1	Actin cross-linking toxin VgrG1
1	2026703	2026879	IFR263	1	Genbank	CDS	2024746	2027373	vgrG1_1	+	.	ecl8_01923	vgrG1_1	Actin cross-linking toxin VgrG1
1	2027109	2027310	IFR264	1	Genbank	CDS	2024746	2027373	vgrG1_1	+	.	ecl8_01923	vgrG1_1	Actin cross-linking toxin VgrG1
1	2027676	2027923	IFR265	1	Genbank	CDS	2027376	2029403	safA	+	.	ecl8_01924	safA	SpoIVD-associated factor A
1	2028032	2028180	IFR266	1	Genbank	CDS	2027376	2029403	safA	+	.	ecl8_01924	safA	SpoIVD-associated factor A
1	2028181	2028367	IFR267	1	Genbank	CDS	2027376	2029403	safA	+	.	ecl8_01924	safA	SpoIVD-associated factor A
1	2028481	2029079	IFR268	1	Genbank	CDS	2027376	2029403	safA	+	.	ecl8_01924	safA	SpoIVD-associated factor A
1	2029085	2029265	IFR269	1	Genbank	CDS	2027376	2029403	safA	+	.	ecl8_01924	safA	SpoIVD-associated factor A
1	2029504	2030181	IFR270	1	Genbank	CDS	2029535	2030314	ecl8_01925	+	.	ecl8_01925	ecl8_01925	hypothetical protein
1	2030182	2030612	IFR271	1	Genbank	CDS	2029535	2030314	ecl8_01925	+	.	ecl8_01925	ecl8_01925	hypothetical protein
1	2031248	2031781	IFR273	1	Genbank	CDS	2031502	2032713	ecl8_01926	+	.	ecl8_01926	ecl8_01926	hypothetical protein
1	2031791	2032397	IFR274	1	Genbank	CDS	2031502	2032713	ecl8_01926	+	.	ecl8_01926	ecl8_01926	hypothetical protein
1	2032526	2032814	IFR275	1	Genbank	CDS	2032728	2036144	ecl8_01927	+	.	ecl8_01927	ecl8_01927	hypothetical protein
1	2032526	2032814	IFR275	1	Genbank	CDS	2031502	2032713	ecl8_01926	+	.	ecl8_01926	ecl8_01926	hypothetical protein
1	2044307	2044821	IFR276	1	Genbank	CDS	2044236	2044820	pth	-	.	ecl8_01936	pth	Peptidyl-tRNA hydrolase
1	2048392	2050422	IFR277	1	Genbank	CDS	2048440	2049387	prs	-	.	ecl8_01940	prs	Ribose-phosphate pyrophosphokinase
1	2048392	2050422	IFR277	1	Genbank	CDS	2049571	2050422	ispE	-	.	ecl8_01941	ispE	4-diphosphocytidyl-2-C-methyl-D-erythritol kinase
1	2048392	2050422	IFR277	1	Genbank	CDS	2050419	2051030	lolB	-	.	ecl8_01942	lolB	Outer-membrane lipoprotein LolB
1	2050438	2051081	IFR278	1	Genbank	CDS	2050419	2051030	lolB	-	.	ecl8_01942	lolB	Outer-membrane lipoprotein LolB
1	2051265	2053627	IFR279	1	Genbank	CDS	2051301	2052557	hemA	+	.	ecl8_01943	hemA	Glutamyl-tRNA reductase
1	2051265	2053627	IFR279	1	Genbank	CDS	2052600	2053682	prfA	+	.	ecl8_01944	prfA	Peptide chain release factor RF1
1	2055747	2056594	IFR280	1	Genbank	CDS	2055778	2056632	kdsA	+	.	ecl8_01948	kdsA	2-dehydro-3-deoxyphosphooctonate aldolase
1	2064566	2064732	IFR281	1	Genbank	CDS	2064624	2068691	nasD_2	+	.	ecl8_01958	nasD_2	Nitrite reductase [NAD(P)H]
1	2064566	2064732	IFR281	1	Genbank	CDS	2063825	2064613	cmpC_1	+	.	ecl8_01957	cmpC_1	Bicarbonate transport ATP-binding protein CmpC
1	2110008	2110245	IFR282	1	Genbank	CDS	2109731	2110252	ecl8_01998	-	.	ecl8_01998	ecl8_01998	hypothetical protein
1	2120237	2122317	IFR284	1	Genbank	CDS	2120404	2122332	thrS_1	+	.	ecl8_02009	thrS_1	Threonine--tRNA ligase
1	2122318	2123155	IFR285	1	Genbank	CDS	2120404	2122332	thrS_1	+	.	ecl8_02009	thrS_1	Threonine--tRNA ligase
1	2122318	2123155	IFR285	1	Genbank	CDS	2122444	2122878	infC	+	.	ecl8_02010	infC	Translation initiation factor IF-3
1	2122318	2123155	IFR285	1	Genbank	CDS	2122971	2123168	rpmI	+	.	ecl8_02011	rpmI	50S ribosomal protein L35
1	2123156	2123596	IFR286	1	Genbank	CDS	2122971	2123168	rpmI	+	.	ecl8_02011	rpmI	50S ribosomal protein L35
1	2123156	2123596	IFR286	1	Genbank	CDS	2123219	2123575	rplT	+	.	ecl8_02012	rplT	50S ribosomal protein L20
1	2123802	2124860	IFR287	1	Genbank	CDS	2123882	2124865	pheS	+	.	ecl8_02013	pheS	Phenylalanine--tRNA ligase alpha subunit
1	2124880	2127253	IFR288	1	Genbank	CDS	2124881	2127268	pheT	+	.	ecl8_02014	pheT	Phenylalanine--tRNA ligase beta subunit
1	2196340	2196490	IFR290	1	Genbank	CDS	2195522	2196415	gltC_2	+	.	ecl8_02087	gltC_2	HTH-type transcriptional regulator GltC
1	2239636	2239935	IFR291	1	Genbank	CDS	2239799	2240734	ecl8_02130	+	.	ecl8_02130	ecl8_02130	hypothetical protein
1	2239936	2240342	IFR292	1	Genbank	CDS	2239799	2240734	ecl8_02130	+	.	ecl8_02130	ecl8_02130	hypothetical protein
1	2240343	2240694	IFR293	1	Genbank	CDS	2239799	2240734	ecl8_02130	+	.	ecl8_02130	ecl8_02130	hypothetical protein
1	2240842	2241045	IFR294	1	Genbank	CDS	2240731	2241792	rstB_1	-	.	ecl8_02131	rstB_1	Sensor protein RstB
1	2242555	2243134	IFR295	1	Genbank	CDS	2242776	2243165	ecl8_02133	+	.	ecl8_02133	ecl8_02133	hypothetical protein
1	2243675	2243838	IFR296	1	Genbank	CDS	2243395	2244279	ecl8_02134	+	.	ecl8_02134	ecl8_02134	hypothetical protein
1	2243848	2244018	IFR297	1	Genbank	CDS	2243395	2244279	ecl8_02134	+	.	ecl8_02134	ecl8_02134	hypothetical protein
1	2249794	2249965	IFR298	1	Genbank	CDS	2249239	2249880	ecl8_02138	-	.	ecl8_02138	ecl8_02138	hypothetical protein
1	2284501	2284712	IFR299	1	Genbank	CDS	2283492	2284523	srkA_1	-	.	ecl8_02173	srkA_1	Stress response kinase A
1	2302556	2302767	IFR300	1	Genbank	CDS	2301891	2302607	ecl8_02192	-	.	ecl8_02192	ecl8_02192	hypothetical protein
1	2302556	2302767	IFR300	1	Genbank	CDS	2302653	2303087	ecl8_02193	-	.	ecl8_02193	ecl8_02193	hypothetical protein
1	2312904	2313495	IFR301	1	Genbank	CDS	2312926	2313561	ribC	+	.	ecl8_02206	ribC	Riboflavin synthase
1	2327836	2328009	IFR302	1	Genbank	CDS	2327588	2328109	sodC	+	.	ecl8_02223	sodC	Superoxide dismutase [Cu-Zn]
1	2333071	2333237	IFR303	1	Genbank	CDS	2331916	2333277	dgcT	-	.	ecl8_02228	dgcT	putative diguanylate cyclase DgcT
1	2336128	2336337	IFR304	1	Genbank	CDS	2335827	2336489	pdxH	+	.	ecl8_02232	pdxH	Pyridoxine/pyridoxamine 5'-phosphate oxidase
1	2336419	2337942	IFR305	1	Genbank	CDS	2335827	2336489	pdxH	+	.	ecl8_02232	pdxH	Pyridoxine/pyridoxamine 5'-phosphate oxidase
1	2336419	2337942	IFR305	1	Genbank	CDS	2336614	2337888	tyrS	+	.	ecl8_02233	tyrS	Tyrosine--tRNA ligase
1	2378908	2379066	IFR306	1	Genbank	CDS	2377911	2379872	ydcP_2	+	.	ecl8_02274	ydcP_2	putative protease YdcP
1	2383476	2383650	IFR307	1	Genbank	CDS	2383646	2383744	ecl8_02280	+	.	ecl8_02280	ecl8_02280	hypothetical protein
1	2476467	2476614	IFR312	1	Genbank	CDS	2476475	2476921	ecl8_02370	-	.	ecl8_02370	ecl8_02370	hypothetical protein
1	2477244	2477402	IFR313	1	Genbank	CDS	2476930	2477433	ecl8_02371	-	.	ecl8_02371	ecl8_02371	hypothetical protein
1	2480543	2480690	IFR314	1	Genbank	CDS	2480587	2481510	fieF_1	+	.	ecl8_02377	fieF_1	Ferrous-iron efflux pump FieF
1	2540018	2540213	IFR316	1	Genbank	CDS	2539404	2540303	ecl8_02430	-	.	ecl8_02430	ecl8_02430	hypothetical protein
1	2572397	2572633	IFR317	1	Genbank	CDS	2572501	2572971	ecl8_02464	+	.	ecl8_02464	ecl8_02464	hypothetical protein
1	2572397	2572633	IFR317	1	Genbank	CDS	2572204	2572470	ulaB_1	+	.	ecl8_02463	ulaB_1	Ascorbate-specific PTS system EIIB component
1	2574206	2574398	IFR318	1	Genbank	CDS	2573779	2574459	alsE	+	.	ecl8_02466	alsE	D-allulose-6-phosphate 3-epimerase
1	2574419	2574680	IFR319	1	Genbank	CDS	2573779	2574459	alsE	+	.	ecl8_02466	alsE	D-allulose-6-phosphate 3-epimerase
1	2574419	2574680	IFR319	1	Genbank	CDS	2574576	2575046	mngA	+	.	ecl8_02467	mngA	PTS system 2-O-alpha-mannosyl-D-glycerate-specific EIIABC component
1	2574741	2574938	IFR320	1	Genbank	CDS	2574576	2575046	mngA	+	.	ecl8_02467	mngA	PTS system 2-O-alpha-mannosyl-D-glycerate-specific EIIABC component
1	2574954	2575124	IFR321	1	Genbank	CDS	2574576	2575046	mngA	+	.	ecl8_02467	mngA	PTS system 2-O-alpha-mannosyl-D-glycerate-specific EIIABC component
1	2574954	2575124	IFR321	1	Genbank	CDS	2575103	2575414	manP	+	.	ecl8_02468	manP	PTS system mannose-specific EIIBCA component
1	2590513	2590694	IFR322	1	Genbank	CDS	2589655	2590527	rbsK_1	-	.	ecl8_02483	rbsK_1	Ribokinase
1	2590513	2590694	IFR322	1	Genbank	CDS	2590554	2591399	ecl8_02484	+	.	ecl8_02484	ecl8_02484	hypothetical protein
1	2600703	2600885	IFR323	1	Genbank	CDS	2600400	2600918	ecl8_02492	+	.	ecl8_02492	ecl8_02492	hypothetical protein
1	2607515	2607670	IFR325	1	Genbank	CDS	2607235	2607561	ykkD	+	.	ecl8_02500	ykkD	Multidrug resistance protein YkkD
1	2607515	2607670	IFR325	1	Genbank	CDS	2607623	2608507	pgrR_6	-	.	ecl8_02501	pgrR_6	HTH-type transcriptional regulator PgrR
1	2648961	2649115	IFR326	1	Genbank	CDS	2648961	2649248	hipB	-	.	ecl8_02539	hipB	Antitoxin HipB
1	2671519	2671945	IFR327	1	Genbank	CDS	2671244	2671726	hcpA_1	-	.	ecl8_02565	hcpA_1	Major exported protein
1	2671519	2671945	IFR327	1	Genbank	CDS	2671745	2671939	ecl8_02566	-	.	ecl8_02566	ecl8_02566	hypothetical protein
1	2671519	2671945	IFR327	1	Genbank	CDS	2671944	2672255	ecl8_02567	-	.	ecl8_02567	ecl8_02567	hypothetical protein
1	2672187	2672546	IFR328	1	Genbank	CDS	2671944	2672255	ecl8_02567	-	.	ecl8_02567	ecl8_02567	hypothetical protein
1	2672187	2672546	IFR328	1	Genbank	CDS	2672362	2672658	ecl8_02568	-	.	ecl8_02568	ecl8_02568	hypothetical protein
1	2672547	2672798	IFR329	1	Genbank	CDS	2672362	2672658	ecl8_02568	-	.	ecl8_02568	ecl8_02568	hypothetical protein
1	2691652	2691803	IFR330	1	Genbank	CDS	2691245	2691922	fabG_7	+	.	ecl8_02588	fabG_7	3-oxoacyl-[acyl-carrier-protein] reductase FabG
1	2724014	2724331	IFR331	1	Genbank	CDS	2724264	2724875	ecl8_02625	+	.	ecl8_02625	ecl8_02625	hypothetical protein
1	2724759	2725164	IFR332	1	Genbank	CDS	2724264	2724875	ecl8_02625	+	.	ecl8_02625	ecl8_02625	hypothetical protein
1	2728567	2728899	IFR333	1	Genbank	CDS	2728826	2729461	nreC	+	.	ecl8_02630	nreC	Oxygen regulatory protein NreC
1	2728937	2729195	IFR334	1	Genbank	CDS	2728826	2729461	nreC	+	.	ecl8_02630	nreC	Oxygen regulatory protein NreC
1	2729255	2729679	IFR335	1	Genbank	CDS	2728826	2729461	nreC	+	.	ecl8_02630	nreC	Oxygen regulatory protein NreC
1	2729255	2729679	IFR335	1	Genbank	CDS	2729458	2729580	ecl8_02631	-	.	ecl8_02631	ecl8_02631	hypothetical protein
1	2736158	2736328	IFR336	1	Genbank	CDS	2735748	2736179	uspG_1	-	.	ecl8_02638	uspG_1	Universal stress protein UP12
1	2745362	2745508	IFR337	1	Genbank	CDS	2745310	2746167	dmsC_1	+	.	ecl8_02648	dmsC_1	Anaerobic dimethyl sulfoxide reductase chain C
1	2757829	2757988	IFR338	1	Genbank	CDS	2757982	2759028	ecl8_02662	-	.	ecl8_02662	ecl8_02662	hypothetical protein
1	2785829	2785987	IFR342	1	Genbank	CDS	2785755	2786519	catD	-	.	ecl8_02685	catD	3-oxoadipate enol-lactonase 2
1	2816016	2816161	IFR343	1	Genbank	CDS	2815693	2816871	manA	+	.	ecl8_02713	manA	Mannose-6-phosphate isomerase
1	2825866	2826031	IFR344	1	Genbank	CDS	2825446	2826654	ecl8_02722	+	.	ecl8_02722	ecl8_02722	hypothetical protein
1	2843850	2844058	IFR345	1	Genbank	CDS	2842870	2843868	iolS_3	-	.	ecl8_02737	iolS_3	Aldo-keto reductase IolS
1	2843850	2844058	IFR345	1	Genbank	CDS	2843969	2844916	pgrR_8	+	.	ecl8_02738	pgrR_8	HTH-type transcriptional regulator PgrR
1	2866763	2866949	IFR346	1	Genbank	CDS	2866926	2868971	paaZ	+	.	ecl8_02761	paaZ	Bifunctional protein PaaZ
1	2868071	2868234	IFR347	1	Genbank	CDS	2866926	2868971	paaZ	+	.	ecl8_02761	paaZ	Bifunctional protein PaaZ
1	2869876	2870063	IFR348	1	Genbank	CDS	2869448	2871715	maoA	+	.	ecl8_02762	maoA	Primary amine oxidase
1	2925171	2925326	IFR350	1	Genbank	CDS	2925146	2925688	ecl8_02818	-	.	ecl8_02818	ecl8_02818	hypothetical protein
1	2953413	2953673	IFR352	1	Genbank	CDS	2952958	2954490	ecl8_02840	-	.	ecl8_02840	ecl8_02840	hypothetical protein
1	2953825	2954016	IFR353	1	Genbank	CDS	2952958	2954490	ecl8_02840	-	.	ecl8_02840	ecl8_02840	hypothetical protein
1	2954394	2954556	IFR354	1	Genbank	CDS	2952958	2954490	ecl8_02840	-	.	ecl8_02840	ecl8_02840	hypothetical protein
1	2962287	2963038	IFR355	1	Genbank	CDS	2962034	2963044	ecl8_02849	-	.	ecl8_02849	ecl8_02849	hypothetical protein
1	2977025	2977183	IFR357	1	Genbank	CDS	2977176	2978150	pspF	+	.	ecl8_02863	pspF	Psp operon transcriptional activator
1	2992927	2993848	IFR358	1	Genbank	CDS	2993077	2993865	fabI	+	.	ecl8_02876	fabI	Enoyl-[acyl-carrier-protein] reductase [NADH] FabI
1	3000300	3000595	IFR359	1	Genbank	CDS	3000265	3001434	lapB_2	-	.	ecl8_02886	lapB_2	Lipopolysaccharide assembly protein B
1	3000755	3001071	IFR360	1	Genbank	CDS	3000265	3001434	lapB_2	-	.	ecl8_02886	lapB_2	Lipopolysaccharide assembly protein B
1	3001072	3001274	IFR361	1	Genbank	CDS	3000265	3001434	lapB_2	-	.	ecl8_02886	lapB_2	Lipopolysaccharide assembly protein B
1	3001275	3001504	IFR362	1	Genbank	CDS	3000265	3001434	lapB_2	-	.	ecl8_02886	lapB_2	Lipopolysaccharide assembly protein B
1	3001275	3001504	IFR362	1	Genbank	CDS	3001441	3001749	lapA	-	.	ecl8_02887	lapA	Lipopolysaccharide assembly protein A
1	3001505	3001805	IFR363	1	Genbank	CDS	3001441	3001749	lapA	-	.	ecl8_02887	lapA	Lipopolysaccharide assembly protein A
1	3002786	3003393	IFR364	1	Genbank	CDS	3002816	3003418	ribA	+	.	ecl8_02889	ribA	GTP cyclohydrolase-2
1	3007320	3007549	IFR366	1	Genbank	CDS	3006939	3007913	cysB	-	.	ecl8_02892	cysB	HTH-type transcriptional regulator CysB
1	3007569	3007830	IFR367	1	Genbank	CDS	3006939	3007913	cysB	-	.	ecl8_02892	cysB	HTH-type transcriptional regulator CysB
1	3008807	3010854	IFR368	1	Genbank	CDS	3008259	3010856	topA_2	-	.	ecl8_02893	topA_2	DNA topoisomerase 1
1	3020120	3020271	IFR369	1	Genbank	CDS	3019180	3020742	trpE	+	.	ecl8_02904	trpE	Anthranilate synthase component 1
1	3049472	3049703	IFR370	1	Genbank	CDS	3048230	3049588	chbC	-	.	ecl8_02932	chbC	PTS system N,N'-diacetylchitobiose-specific EIIC component
1	3050950	3051757	IFR371	1	Genbank	CDS	3050956	3051783	nadE	+	.	ecl8_02935	nadE	NH(3)-dependent NAD(+) synthetase
1	3083648	3084703	IFR372	1	Genbank	CDS	3083736	3084731	gapA	+	.	ecl8_02967	gapA	Glyceraldehyde-3-phosphate dehydrogenase A
1	3131432	3131657	IFR374	1	Genbank	CDS	3131460	3132518	dgcC	-	.	ecl8_03021	dgcC	putative diguanylate cyclase DgcC
1	3132169	3132652	IFR375	1	Genbank	CDS	3131460	3132518	dgcC	-	.	ecl8_03021	dgcC	putative diguanylate cyclase DgcC
1	3137747	3138702	IFR376	1	Genbank	CDS	3137619	3138869	icd_2	-	.	ecl8_03025	icd_2	Isocitrate dehydrogenase [NADP]
1	3138703	3138872	IFR377	1	Genbank	CDS	3137619	3138869	icd_2	-	.	ecl8_03025	icd_2	Isocitrate dehydrogenase [NADP]
1	3140258	3141121	IFR379	1	Genbank	CDS	3140233	3141399	mnmA	+	.	ecl8_03028	mnmA	tRNA-specific 2-thiouridylase MnmA
1	3141122	3141387	IFR380	1	Genbank	CDS	3140233	3141399	mnmA	+	.	ecl8_03028	mnmA	tRNA-specific 2-thiouridylase MnmA
1	3141995	3143423	IFR381	1	Genbank	CDS	3141454	3142095	hflD	+	.	ecl8_03029	hflD	High frequency lysogenization protein HflD
1	3141995	3143423	IFR381	1	Genbank	CDS	3142099	3143469	purB	+	.	ecl8_03030	purB	Adenylosuccinate lyase
1	3154210	3154365	IFR382	1	Genbank	CDS	3153986	3154447	ymfA	+	.	ecl8_03041	ymfA	Inner membrane protein YmfA
1	3170847	3174123	IFR383	1	Genbank	CDS	3170862	3172106	lolE	-	.	ecl8_03058	lolE	Lipoprotein-releasing system transmembrane protein LolE
1	3170847	3174123	IFR383	1	Genbank	CDS	3172106	3172807	lolD	-	.	ecl8_03059	lolD	Lipoprotein-releasing system ATP-binding protein LolD
1	3170847	3174123	IFR383	1	Genbank	CDS	3172800	3173999	lolC	-	.	ecl8_03060	lolC	Lipoprotein-releasing system transmembrane protein LolC
1	3191607	3193207	IFR384	1	Genbank	CDS	3191531	3192535	holB	-	.	ecl8_03076	holB	DNA polymerase III subunit delta'
1	3191607	3193207	IFR384	1	Genbank	CDS	3192532	3193173	tmk	-	.	ecl8_03077	tmk	Thymidylate kinase
1	3191607	3193207	IFR384	1	Genbank	CDS	3193163	3194185	mltG	-	.	ecl8_03078	mltG	Endolytic murein transglycosylase
1	3193956	3194112	IFR385	1	Genbank	CDS	3193163	3194185	mltG	-	.	ecl8_03078	mltG	Endolytic murein transglycosylase
1	3196446	3196776	IFR386	1	Genbank	CDS	3196453	3196689	acpP	-	.	ecl8_03081	acpP	Acyl carrier protein
1	3196881	3197169	IFR387	1	Genbank	CDS	3196900	3197634	fabG_10	-	.	ecl8_03082	fabG_10	3-oxoacyl-[acyl-carrier-protein] reductase FabG
1	3197170	3197669	IFR388	1	Genbank	CDS	3196900	3197634	fabG_10	-	.	ecl8_03082	fabG_10	3-oxoacyl-[acyl-carrier-protein] reductase FabG
1	3197170	3197669	IFR388	1	Genbank	CDS	3197647	3198576	fabD_2	-	.	ecl8_03083	fabD_2	Malonyl CoA-acyl carrier protein transacylase
1	3197697	3198576	IFR389	1	Genbank	CDS	3197647	3198576	fabD_2	-	.	ecl8_03083	fabD_2	Malonyl CoA-acyl carrier protein transacylase
1	3198586	3199542	IFR390	1	Genbank	CDS	3198592	3199545	fabH	-	.	ecl8_03084	fabH	3-oxoacyl-[acyl-carrier-protein] synthase 3
1	3203989	3204881	IFR392	1	Genbank	CDS	3204028	3207261	rne	+	.	ecl8_03090	rne	Ribonuclease E
1	3204882	3205500	IFR393	1	Genbank	CDS	3204028	3207261	rne	+	.	ecl8_03090	rne	Ribonuclease E
1	3205604	3205768	IFR394	1	Genbank	CDS	3204028	3207261	rne	+	.	ecl8_03090	rne	Ribonuclease E
1	3209620	3209776	IFR395	1	Genbank	CDS	3209614	3211149	murJ	-	.	ecl8_03093	murJ	putative lipid II flippase MurJ
1	3209777	3211143	IFR396	1	Genbank	CDS	3209614	3211149	murJ	-	.	ecl8_03093	murJ	putative lipid II flippase MurJ
1	3283421	3283582	IFR397	1	Genbank	CDS	3283536	3285188	oppA_2	-	.	ecl8_03168	oppA_2	Periplasmic oligopeptide-binding protein
1	3286182	3286529	IFR398	1	Genbank	CDS	3286206	3286535	tusE	+	.	ecl8_03170	tusE	Sulfurtransferase TusE
1	3289075	3289222	IFR399	1	Genbank	CDS	3288487	3289152	ecl8_03173	+	.	ecl8_03173	ecl8_03173	hypothetical protein
1	3289075	3289222	IFR399	1	Genbank	CDS	3289162	3290841	ecl8_03174	+	.	ecl8_03174	ecl8_03174	hypothetical protein
1	3289339	3289518	IFR400	1	Genbank	CDS	3289162	3290841	ecl8_03174	+	.	ecl8_03174	ecl8_03174	hypothetical protein
1	3289671	3289871	IFR401	1	Genbank	CDS	3289162	3290841	ecl8_03174	+	.	ecl8_03174	ecl8_03174	hypothetical protein
1	3289872	3290904	IFR402	1	Genbank	CDS	3289162	3290841	ecl8_03174	+	.	ecl8_03174	ecl8_03174	hypothetical protein
1	3307896	3308409	IFR403	1	Genbank	CDS	3307916	3308434	fabA	+	.	ecl8_03193	fabA	3-hydroxydecanoyl-[acyl-carrier-protein] dehydratase
1	3334190	3335684	IFR404	1	Genbank	CDS	3334256	3335656	asnS	+	.	ecl8_03214	asnS	Asparagine--tRNA ligase
1	3342411	3348743	IFR406	1	Genbank	CDS	3346728	3347432	mukE	-	.	ecl8_03222	mukE	Chromosome partition protein MukE
1	3342411	3348743	IFR406	1	Genbank	CDS	3347413	3348735	mukF	-	.	ecl8_03223	mukF	Chromosome partition protein MukF
1	3342411	3348743	IFR406	1	Genbank	CDS	3348732	3349532	cmoM	-	.	ecl8_03224	cmoM	tRNA 5-carboxymethoxyuridine methyltransferase
1	3342411	3348743	IFR406	1	Genbank	CDS	3342280	3346728	mukB	-	.	ecl8_03221	mukB	Chromosome partition protein MukB
1	3351458	3352410	IFR407	1	Genbank	CDS	3351441	3352187	kdsB	-	.	ecl8_03227	kdsB	3-deoxy-manno-octulosonate cytidylyltransferase
1	3351458	3352410	IFR407	1	Genbank	CDS	3352184	3352366	ecl8_03228	-	.	ecl8_03228	ecl8_03228	hypothetical protein
1	3353727	3354767	IFR408	1	Genbank	CDS	3353714	3354694	lpxK	-	.	ecl8_03230	lpxK	Tetraacyldisaccharide 4'-kinase
1	3353727	3354767	IFR408	1	Genbank	CDS	3354691	3356439	msbA_1	-	.	ecl8_03231	msbA_1	Lipid A export ATP-binding/permease protein MsbA
1	3354768	3356502	IFR409	1	Genbank	CDS	3354691	3356439	msbA_1	-	.	ecl8_03231	msbA_1	Lipid A export ATP-binding/permease protein MsbA
1	3354768	3356502	IFR409	1	Genbank	CDS	3356476	3358740	comEC	-	.	ecl8_03232	comEC	ComE operon protein 3
1	3359765	3361191	IFR410	1	Genbank	CDS	3359385	3361058	rpsA	-	.	ecl8_03234	rpsA	30S ribosomal protein S1
1	3361334	3361483	IFR411	1	Genbank	CDS	3361192	3361875	cmk	-	.	ecl8_03235	cmk	Cytidylate kinase
1	3361484	3361779	IFR412	1	Genbank	CDS	3361192	3361875	cmk	-	.	ecl8_03235	cmk	Cytidylate kinase
1	3375743	3375895	IFR413	1	Genbank	CDS	3374840	3377278	dmsA_1	-	.	ecl8_03246	dmsA_1	Dimethyl sulfoxide reductase DmsA
1	3377511	3378144	IFR414	1	Genbank	CDS	3377479	3378771	serS	-	.	ecl8_03247	serS	Serine--tRNA ligase
1	3378145	3378844	IFR415	1	Genbank	CDS	3377479	3378771	serS	-	.	ecl8_03247	serS	Serine--tRNA ligase
1	3380214	3380690	IFR416	1	Genbank	CDS	3380214	3380825	lolA	-	.	ecl8_03249	lolA	Outer-membrane lipoprotein carrier protein
1	3381049	3381317	IFR417	1	Genbank	CDS	3380948	3385057	ftsK	-	.	ecl8_03250	ftsK	DNA translocase FtsK
1	3381592	3381899	IFR418	1	Genbank	CDS	3380948	3385057	ftsK	-	.	ecl8_03250	ftsK	DNA translocase FtsK
1	3381917	3382174	IFR419	1	Genbank	CDS	3380948	3385057	ftsK	-	.	ecl8_03250	ftsK	DNA translocase FtsK
1	3382281	3382481	IFR420	1	Genbank	CDS	3380948	3385057	ftsK	-	.	ecl8_03250	ftsK	DNA translocase FtsK
1	3382482	3382747	IFR421	1	Genbank	CDS	3380948	3385057	ftsK	-	.	ecl8_03250	ftsK	DNA translocase FtsK
1	3382748	3383091	IFR422	1	Genbank	CDS	3380948	3385057	ftsK	-	.	ecl8_03250	ftsK	DNA translocase FtsK
1	3383189	3383410	IFR423	1	Genbank	CDS	3380948	3385057	ftsK	-	.	ecl8_03250	ftsK	DNA translocase FtsK
1	3383411	3383713	IFR424	1	Genbank	CDS	3380948	3385057	ftsK	-	.	ecl8_03250	ftsK	DNA translocase FtsK
1	3384061	3384220	IFR425	1	Genbank	CDS	3380948	3385057	ftsK	-	.	ecl8_03250	ftsK	DNA translocase FtsK
1	3384393	3385141	IFR426	1	Genbank	CDS	3380948	3385057	ftsK	-	.	ecl8_03250	ftsK	DNA translocase FtsK
1	3386542	3386712	IFR427	1	Genbank	CDS	3386193	3387188	trxB	+	.	ecl8_03252	trxB	Thioredoxin reductase
1	3386804	3386957	IFR428	1	Genbank	CDS	3386193	3387188	trxB	+	.	ecl8_03252	trxB	Thioredoxin reductase
1	3391806	3392091	IFR429	1	Genbank	CDS	3391891	3392109	infA	+	.	ecl8_03256	infA	Translation initiation factor IF-1
1	3446282	3446458	IFR430	1	Genbank	CDS	3446096	3446758	ecl8_03310	+	.	ecl8_03310	ecl8_03310	hypothetical protein
1	3455226	3455392	IFR431	1	Genbank	CDS	3455183	3456847	ecl8_03323	-	.	ecl8_03323	ecl8_03323	hypothetical protein
1	3455623	3455844	IFR432	1	Genbank	CDS	3455183	3456847	ecl8_03323	-	.	ecl8_03323	ecl8_03323	hypothetical protein
1	3456036	3456221	IFR433	1	Genbank	CDS	3455183	3456847	ecl8_03323	-	.	ecl8_03323	ecl8_03323	hypothetical protein
1	3456439	3456601	IFR434	1	Genbank	CDS	3455183	3456847	ecl8_03323	-	.	ecl8_03323	ecl8_03323	hypothetical protein
1	3461686	3462328	IFR435	1	Genbank	CDS	3461778	3462338	ecl8_03332	+	.	ecl8_03332	ecl8_03332	hypothetical protein
1	3463745	3463936	IFR436	1	Genbank	CDS	3462945	3464018	ecl8_03334	+	.	ecl8_03334	ecl8_03334	hypothetical protein
1	3608959	3609148	IFR438	1	Genbank	CDS	3608266	3609591	tolA_2	-	.	ecl8_03474	tolA_2	Protein TolA
1	3618122	3618283	IFR440	1	Genbank	CDS	3617474	3618700	sucB	-	.	ecl8_03484	sucB	Dihydrolipoyllysine-residue succinyltransferase component of 2-oxoglutarate dehydrogenase complex
1	3618284	3618484	IFR441	1	Genbank	CDS	3617474	3618700	sucB	-	.	ecl8_03484	sucB	Dihydrolipoyllysine-residue succinyltransferase component of 2-oxoglutarate dehydrogenase complex
1	3619066	3619249	IFR442	1	Genbank	CDS	3618715	3621522	sucA	-	.	ecl8_03485	sucA	2-oxoglutarate dehydrogenase E1 component
1	3620717	3620866	IFR443	1	Genbank	CDS	3618715	3621522	sucA	-	.	ecl8_03485	sucA	2-oxoglutarate dehydrogenase E1 component
1	3621303	3621536	IFR444	1	Genbank	CDS	3618715	3621522	sucA	-	.	ecl8_03485	sucA	2-oxoglutarate dehydrogenase E1 component
1	3628280	3628427	IFR445	1	Genbank	CDS	3627969	3628613	pcp	-	.	ecl8_03492	pcp	Pyrrolidone-carboxylate peptidase
1	3649321	3649565	IFR446	1	Genbank	CDS	3649371	3649901	fldA	+	.	ecl8_03512	fldA	Flavodoxin
1	3649566	3649868	IFR447	1	Genbank	CDS	3649371	3649901	fldA	+	.	ecl8_03512	fldA	Flavodoxin
1	3653530	3655227	IFR448	1	Genbank	CDS	3653481	3655148	glnS	-	.	ecl8_03518	glnS	Glutamine--tRNA ligase
1	3664938	3665234	IFR449	1	Genbank	CDS	3664808	3665983	ubiF	-	.	ecl8_03532	ubiF	2-octaprenyl-3-methyl-6-methoxy-1,4-benzoquinol hydroxylase
1	3668797	3669214	IFR450	1	Genbank	CDS	3668784	3669257	ybeY	+	.	ecl8_03535	ybeY	Endoribonuclease YbeY
1	3670376	3671914	IFR451	1	Genbank	CDS	3670409	3671947	lnt	+	.	ecl8_03537	lnt	Apolipoprotein N-acyltransferase
1	3680089	3682519	IFR452	1	Genbank	CDS	3680175	3682757	leuS	+	.	ecl8_03545	leuS	Leucine--tRNA ligase
1	3682520	3682740	IFR453	1	Genbank	CDS	3680175	3682757	leuS	+	.	ecl8_03545	leuS	Leucine--tRNA ligase
1	3682767	3683200	IFR454	1	Genbank	CDS	3682772	3683362	lptE	+	.	ecl8_03546	lptE	LPS-assembly lipoprotein LptE
1	3683201	3683353	IFR455	1	Genbank	CDS	3682772	3683362	lptE	+	.	ecl8_03546	lptE	LPS-assembly lipoprotein LptE
1	3683354	3684358	IFR456	1	Genbank	CDS	3682772	3683362	lptE	+	.	ecl8_03546	lptE	LPS-assembly lipoprotein LptE
1	3683354	3684358	IFR456	1	Genbank	CDS	3683359	3684393	holA	+	.	ecl8_03547	holA	DNA polymerase III subunit delta
1	3684412	3685020	IFR457	1	Genbank	CDS	3684386	3685036	nadD	+	.	ecl8_03548	nadD	Nicotinate-nucleotide adenylyltransferase
1	3686763	3687833	IFR458	1	Genbank	CDS	3686777	3688678	mrdA_2	+	.	ecl8_03552	mrdA_2	Peptidoglycan D,D-transpeptidase MrdA
1	3687834	3688604	IFR459	1	Genbank	CDS	3686777	3688678	mrdA_2	+	.	ecl8_03552	mrdA_2	Peptidoglycan D,D-transpeptidase MrdA
1	3688664	3689750	IFR460	1	Genbank	CDS	3686777	3688678	mrdA_2	+	.	ecl8_03552	mrdA_2	Peptidoglycan D,D-transpeptidase MrdA
1	3688664	3689750	IFR460	1	Genbank	CDS	3688678	3689790	mrdB	+	.	ecl8_03553	mrdB	Peptidoglycan glycosyltransferase MrdB
1	3692361	3692582	IFR461	1	Genbank	CDS	3692401	3692664	ecl8_03556	+	.	ecl8_03556	ecl8_03556	hypothetical protein
1	3695320	3695521	IFR462	1	Genbank	CDS	3694684	3695649	lipA	+	.	ecl8_03559	lipA	Lipoyl synthase
1	3705973	3706150	IFR463	1	Genbank	CDS	3706081	3707013	ybdO_2	+	.	ecl8_03572	ybdO_2	putative HTH-type transcriptional regulator YbdO
1	3717191	3717342	IFR465	1	Genbank	CDS	3716824	3717813	alsC	+	.	ecl8_03581	alsC	D-allose transport system permease protein AlsC
1	3773573	3773802	IFR466	1	Genbank	CDS	3772571	3773638	rbsC_5	+	.	ecl8_03628	rbsC_5	Ribose import permease protein RbsC
1	3773573	3773802	IFR466	1	Genbank	CDS	3773699	3774496	fabG_13	+	.	ecl8_03629	fabG_13	3-oxoacyl-[acyl-carrier-protein] reductase FabG
1	3853300	3853474	IFR467	1	Genbank	CDS	3853097	3853459	higA	-	.	ecl8_03699	higA	Antitoxin HigA
1	3853300	3853474	IFR467	1	Genbank	CDS	3853460	3853762	higB	-	.	ecl8_03700	higB	mRNA interferase toxin HigB
1	3865786	3866052	IFR468	1	Genbank	CDS	3864687	3865865	hipO_4	-	.	ecl8_03710	hipO_4	Hippurate hydrolase
1	3926448	3926901	IFR470	1	Genbank	CDS	3926283	3926456	ecl8_03762	-	.	ecl8_03762	ecl8_03762	hypothetical protein
1	3926448	3926901	IFR470	1	Genbank	CDS	3926569	3926931	ecl8_03763	+	.	ecl8_03763	ecl8_03763	hypothetical protein
1	3951318	3951719	IFR471	1	Genbank	CDS	3951621	3952106	ecl8_03807	+	.	ecl8_03807	ecl8_03807	putative HTH-type transcriptional regulator
1	3951720	3952075	IFR472	1	Genbank	CDS	3951621	3952106	ecl8_03807	+	.	ecl8_03807	ecl8_03807	putative HTH-type transcriptional regulator
1	3952655	3952865	IFR473	1	Genbank	CDS	3952652	3953320	ecl8_03809	+	.	ecl8_03809	ecl8_03809	hypothetical protein
1	3953313	3953494	IFR474	1	Genbank	CDS	3952652	3953320	ecl8_03809	+	.	ecl8_03809	ecl8_03809	hypothetical protein
1	3953313	3953494	IFR474	1	Genbank	CDS	3953317	3953721	ecl8_03810	+	.	ecl8_03810	ecl8_03810	hypothetical protein
1	3953495	3953716	IFR475	1	Genbank	CDS	3953317	3953721	ecl8_03810	+	.	ecl8_03810	ecl8_03810	hypothetical protein
1	3954600	3954779	IFR476	1	Genbank	CDS	3954657	3955187	ecl8_03815	+	.	ecl8_03815	ecl8_03815	hypothetical protein
1	3954780	3955031	IFR477	1	Genbank	CDS	3954657	3955187	ecl8_03815	+	.	ecl8_03815	ecl8_03815	hypothetical protein
1	3961336	3961890	IFR478	1	Genbank	CDS	3961356	3962222	folD	+	.	ecl8_03827	folD	Bifunctional protein FolD protein
1	3961891	3962178	IFR479	1	Genbank	CDS	3961356	3962222	folD	+	.	ecl8_03827	folD	Bifunctional protein FolD protein
1	3962500	3963905	IFR480	1	Genbank	CDS	3962482	3963867	cysS_1	-	.	ecl8_03829	cysS_1	Cysteine--tRNA ligase
1	3964028	3964317	IFR481	1	Genbank	CDS	3964043	3964537	ppiB	+	.	ecl8_03830	ppiB	Peptidyl-prolyl cis-trans isomerase B
1	3964532	3965234	IFR482	1	Genbank	CDS	3964043	3964537	ppiB	+	.	ecl8_03830	ppiB	Peptidyl-prolyl cis-trans isomerase B
1	3964532	3965234	IFR482	1	Genbank	CDS	3964541	3965263	lpxH	+	.	ecl8_03831	lpxH	UDP-2,3-diacylglucosamine hydrolase
1	3989672	3990617	IFR483	1	Genbank	CDS	3989649	3990611	hemH	-	.	ecl8_03854	hemH	Ferrochelatase
1	3990711	3991452	IFR484	1	Genbank	CDS	3990740	3991384	adk	-	.	ecl8_03855	adk	Adenylate kinase
1	3994605	3996490	IFR485	1	Genbank	CDS	3994588	3996495	dnaX	-	.	ecl8_03859	dnaX	DNA polymerase III subunit tau
1	4078738	4078914	IFR489	1	Genbank	CDS	4078542	4079441	ispA	+	.	ecl8_03938	ispA	Farnesyl diphosphate synthase
1	4079030	4079225	IFR490	1	Genbank	CDS	4078542	4079441	ispA	+	.	ecl8_03938	ispA	Farnesyl diphosphate synthase
1	4079465	4080669	IFR491	1	Genbank	CDS	4079460	4081322	dxs_3	+	.	ecl8_03939	dxs_3	1-deoxy-D-xylulose-5-phosphate synthase
1	4080670	4081329	IFR492	1	Genbank	CDS	4079460	4081322	dxs_3	+	.	ecl8_03939	dxs_3	1-deoxy-D-xylulose-5-phosphate synthase
1	4083989	4084152	IFR493	1	Genbank	CDS	4083942	4084361	nusB	-	.	ecl8_03943	nusB	Transcription antitermination protein NusB
1	4084163	4084853	IFR494	1	Genbank	CDS	4083942	4084361	nusB	-	.	ecl8_03943	nusB	Transcription antitermination protein NusB
1	4084163	4084853	IFR494	1	Genbank	CDS	4084381	4084851	ribE	-	.	ecl8_03944	ribE	6,7-dimethyl-8-ribityllumazine synthase
1	4084958	4086052	IFR495	1	Genbank	CDS	4084939	4086042	ribD	-	.	ecl8_03945	ribD	Riboflavin biosynthesis protein RibD
1	4084958	4086052	IFR495	1	Genbank	CDS	4086046	4086495	nrdR	-	.	ecl8_03946	nrdR	Transcriptional repressor NrdR
1	4089734	4090582	IFR496	1	Genbank	CDS	4089641	4090612	secF	-	.	ecl8_03951	secF	Protein translocase subunit SecF
1	4090663	4091324	IFR497	1	Genbank	CDS	4090623	4092437	secD	-	.	ecl8_03952	secD	Protein translocase subunit SecD
1	4091325	4092567	IFR498	1	Genbank	CDS	4090623	4092437	secD	-	.	ecl8_03952	secD	Protein translocase subunit SecD
1	4091325	4092567	IFR498	1	Genbank	CDS	4092497	4092829	yajC	-	.	ecl8_03953	yajC	Sec translocon accessory complex subunit YajC
1	4092615	4092784	IFR499	1	Genbank	CDS	4092497	4092829	yajC	-	.	ecl8_03953	yajC	Sec translocon accessory complex subunit YajC
1	4162964	4163124	IFR500	1	Genbank	CDS	4162846	4163388	ecpR	-	.	ecl8_04021	ecpR	HTH-type transcriptional regulator EcpR
1	4163172	4163383	IFR501	1	Genbank	CDS	4162846	4163388	ecpR	-	.	ecl8_04021	ecpR	HTH-type transcriptional regulator EcpR
1	4163384	4163884	IFR502	1	Genbank	CDS	4162846	4163388	ecpR	-	.	ecl8_04021	ecpR	HTH-type transcriptional regulator EcpR
1	4224197	4224370	IFR503	1	Genbank	CDS	4224183	4224764	gmhA	-	.	ecl8_04079	gmhA	Phosphoheptose isomerase
1	4230290	4230997	IFR504	1	Genbank	CDS	4230272	4231012	dnaQ	-	.	ecl8_04085	dnaQ	DNA polymerase III subunit epsilon
1	4231088	4231319	IFR505	1	Genbank	CDS	4231068	4231535	rnhA	+	.	ecl8_04086	rnhA	Ribonuclease HI
1	4249806	4251583	IFR506	1	Genbank	CDS	4249893	4251611	proS_1	+	.	ecl8_04107	proS_1	Proline--tRNA ligase
1	4255030	4256298	IFR507	1	Genbank	CDS	4254996	4256309	tilS	-	.	ecl8_04114	tilS	tRNA(Ile)-lysidine synthase
1	4259054	4262734	IFR508	1	Genbank	CDS	4260038	4263520	dnaE	-	.	ecl8_04118	dnaE	DNA polymerase III subunit alpha
1	4259054	4262734	IFR508	1	Genbank	CDS	4259066	4260025	accA	-	.	ecl8_04117	accA	Acetyl-coenzyme A carboxylase carboxyl transferase subunit alpha
1	4262735	4263520	IFR509	1	Genbank	CDS	4260038	4263520	dnaE	-	.	ecl8_04118	dnaE	DNA polymerase III subunit alpha
1	4264158	4265289	IFR510	1	Genbank	CDS	4264134	4265285	lpxB	-	.	ecl8_04120	lpxB	Lipid-A-disaccharide synthase
1	4264158	4265289	IFR510	1	Genbank	CDS	4265285	4266073	lpxA	-	.	ecl8_04121	lpxA	Acyl-[acyl-carrier-protein]--UDP-N- acetylglucosamine O-acyltransferase
1	4265290	4266579	IFR511	1	Genbank	CDS	4265285	4266073	lpxA	-	.	ecl8_04121	lpxA	Acyl-[acyl-carrier-protein]--UDP-N- acetylglucosamine O-acyltransferase
1	4265290	4266579	IFR511	1	Genbank	CDS	4266077	4266532	fabZ	-	.	ecl8_04122	fabZ	3-hydroxyacyl-[acyl-carrier-protein] dehydratase FabZ
1	4266663	4267668	IFR512	1	Genbank	CDS	4266638	4267663	lpxD	-	.	ecl8_04123	lpxD	UDP-3-O-(3-hydroxymyristoyl)glucosamine N-acyltransferase
1	4266663	4267668	IFR512	1	Genbank	CDS	4267667	4268152	skp	-	.	ecl8_04124	skp	Chaperone protein Skp
1	4268282	4270713	IFR513	1	Genbank	CDS	4268274	4270703	bamA_1	-	.	ecl8_04125	bamA_1	Outer membrane protein assembly factor BamA
1	4270744	4271185	IFR514	1	Genbank	CDS	4270735	4272087	rseP	-	.	ecl8_04126	rseP	Regulator of sigma-E protease RseP
1	4271186	4271385	IFR515	1	Genbank	CDS	4270735	4272087	rseP	-	.	ecl8_04126	rseP	Regulator of sigma-E protease RseP
1	4272107	4273784	IFR516	1	Genbank	CDS	4272099	4272881	cdsA	-	.	ecl8_04127	cdsA	Phosphatidate cytidylyltransferase
1	4272107	4273784	IFR516	1	Genbank	CDS	4272969	4273745	uppS	-	.	ecl8_04128	uppS	Ditrans,polycis-undecaprenyl-diphosphate synthase ((2E,6E)-farnesyl-diphosphate specific)
1	4273992	4275160	IFR517	1	Genbank	CDS	4273965	4275167	dxr	-	.	ecl8_04129	dxr	1-deoxy-D-xylulose 5-phosphate reductoisomerase
1	4275403	4275983	IFR518	1	Genbank	CDS	4275396	4275953	frr	-	.	ecl8_04130	frr	Ribosome-recycling factor
1	4276114	4276876	IFR519	1	Genbank	CDS	4276104	4276829	pyrH	-	.	ecl8_04131	pyrH	Uridylate kinase
1	4277036	4277946	IFR520	1	Genbank	CDS	4276980	4277831	tsf	-	.	ecl8_04132	tsf	Elongation factor Ts
1	4278031	4278325	IFR521	1	Genbank	CDS	4277951	4278676	rpsB	-	.	ecl8_04133	rpsB	30S ribosomal protein S2
1	4278326	4278871	IFR522	1	Genbank	CDS	4277951	4278676	rpsB	-	.	ecl8_04133	rpsB	30S ribosomal protein S2
1	4282562	4283337	IFR523	1	Genbank	CDS	4282545	4283369	dapD	+	.	ecl8_04136	dapD	2,3,4,5-tetrahydropyridine-2,6-dicarboxylate N-succinyltransferase
1	4290681	4291049	IFR524	1	Genbank	CDS	4290695	4291039	erpA	-	.	ecl8_04144	erpA	Iron-sulfur cluster insertion protein ErpA
1	4293670	4293829	IFR525	1	Genbank	CDS	4292720	4294000	hemL	+	.	ecl8_04146	hemL	Glutamate-1-semialdehyde 2,1-aminomutase
1	4326726	4327152	IFR526	1	Genbank	CDS	4326706	4327185	folK	+	.	ecl8_04173	folK	2-amino-4-hydroxy-6- hydroxymethyldihydropteridine pyrophosphokinase
1	4344800	4345211	IFR527	1	Genbank	CDS	4344468	4347065	acnB	-	.	ecl8_04191	acnB	Aconitate hydratase B
1	4345212	4345691	IFR528	1	Genbank	CDS	4344468	4347065	acnB	-	.	ecl8_04191	acnB	Aconitate hydratase B
1	4345821	4346042	IFR529	1	Genbank	CDS	4344468	4347065	acnB	-	.	ecl8_04191	acnB	Aconitate hydratase B
1	4346112	4346547	IFR530	1	Genbank	CDS	4344468	4347065	acnB	-	.	ecl8_04191	acnB	Aconitate hydratase B
1	4346754	4346995	IFR531	1	Genbank	CDS	4344468	4347065	acnB	-	.	ecl8_04191	acnB	Aconitate hydratase B
1	4350519	4350685	IFR532	1	Genbank	CDS	4350417	4351841	lpdA	-	.	ecl8_04195	lpdA	Dihydrolipoyl dehydrogenase
1	4350692	4350838	IFR533	1	Genbank	CDS	4350417	4351841	lpdA	-	.	ecl8_04195	lpdA	Dihydrolipoyl dehydrogenase
1	4351094	4351268	IFR534	1	Genbank	CDS	4350417	4351841	lpdA	-	.	ecl8_04195	lpdA	Dihydrolipoyl dehydrogenase
1	4369450	4369974	IFR535	1	Genbank	CDS	4369400	4370020	coaE	+	.	ecl8_04209	coaE	Dephospho-CoA kinase
1	4371478	4371646	IFR536	1	Genbank	CDS	4371471	4374176	secA_2	-	.	ecl8_04213	secA_2	Protein translocase subunit SecA
1	4371713	4372062	IFR537	1	Genbank	CDS	4371471	4374176	secA_2	-	.	ecl8_04213	secA_2	Protein translocase subunit SecA
1	4372063	4373072	IFR538	1	Genbank	CDS	4371471	4374176	secA_2	-	.	ecl8_04213	secA_2	Protein translocase subunit SecA
1	4373073	4373963	IFR539	1	Genbank	CDS	4371471	4374176	secA_2	-	.	ecl8_04213	secA_2	Protein translocase subunit SecA
1	4373964	4374255	IFR540	1	Genbank	CDS	4371471	4374176	secA_2	-	.	ecl8_04213	secA_2	Protein translocase subunit SecA
1	4373964	4374255	IFR540	1	Genbank	CDS	4374239	4374742	secM	-	.	ecl8_04214	secM	Secretion monitor
1	4374371	4374709	IFR541	1	Genbank	CDS	4374239	4374742	secM	-	.	ecl8_04214	secM	Secretion monitor
1	4375136	4375985	IFR542	1	Genbank	CDS	4375059	4375976	lpxC	-	.	ecl8_04215	lpxC	UDP-3-O-acyl-N-acetylglucosamine deacetylase
1	4376039	4377236	IFR543	1	Genbank	CDS	4376077	4377228	ftsZ	-	.	ecl8_04216	ftsZ	Cell division protein FtsZ
1	4377237	4378556	IFR544	1	Genbank	CDS	4377291	4378553	ftsA_2	-	.	ecl8_04217	ftsA_2	Cell division protein FtsA
1	4377237	4378556	IFR544	1	Genbank	CDS	4378550	4379380	ftsQ	-	.	ecl8_04218	ftsQ	Cell division protein FtsQ
1	4378630	4379385	IFR545	1	Genbank	CDS	4378550	4379380	ftsQ	-	.	ecl8_04218	ftsQ	Cell division protein FtsQ
1	4378630	4379385	IFR545	1	Genbank	CDS	4379382	4380302	ddlB	-	.	ecl8_04219	ddlB	D-alanine--D-alanine ligase B
1	4379574	4379841	IFR546	1	Genbank	CDS	4379382	4380302	ddlB	-	.	ecl8_04219	ddlB	D-alanine--D-alanine ligase B
1	4380308	4381852	IFR547	1	Genbank	CDS	4380295	4381770	murC	-	.	ecl8_04220	murC	UDP-N-acetylmuramate--L-alanine ligase
1	4380308	4381852	IFR547	1	Genbank	CDS	4381818	4382864	murG	-	.	ecl8_04221	murG	UDP-N-acetylglucosamine--N-acetylmuramyl- (pentapeptide) pyrophosphoryl-undecaprenol N-acetylglucosamine transferase
1	4381856	4382176	IFR548	1	Genbank	CDS	4381818	4382864	murG	-	.	ecl8_04221	murG	UDP-N-acetylglucosamine--N-acetylmuramyl- (pentapeptide) pyrophosphoryl-undecaprenol N-acetylglucosamine transferase
1	4382177	4384170	IFR549	1	Genbank	CDS	4381818	4382864	murG	-	.	ecl8_04221	murG	UDP-N-acetylglucosamine--N-acetylmuramyl- (pentapeptide) pyrophosphoryl-undecaprenol N-acetylglucosamine transferase
1	4382177	4384170	IFR549	1	Genbank	CDS	4382885	4384159	ftsW	-	.	ecl8_04222	ftsW	putative peptidoglycan glycosyltransferase FtsW
1	4382177	4384170	IFR549	1	Genbank	CDS	4384159	4385475	murD	-	.	ecl8_04223	murD	UDP-N-acetylmuramoylalanine--D-glutamate ligase
1	4384171	4385475	IFR550	1	Genbank	CDS	4384159	4385475	murD	-	.	ecl8_04223	murD	UDP-N-acetylmuramoylalanine--D-glutamate ligase
1	4385485	4386571	IFR551	1	Genbank	CDS	4385478	4386560	mraY	-	.	ecl8_04224	mraY	Phospho-N-acetylmuramoyl-pentapeptide- transferase
1	4385485	4386571	IFR551	1	Genbank	CDS	4386554	4387912	murF	-	.	ecl8_04225	murF	UDP-N-acetylmuramoyl-tripeptide--D-alanyl-D- alanine ligase
1	4386580	4386908	IFR552	1	Genbank	CDS	4386554	4387912	murF	-	.	ecl8_04225	murF	UDP-N-acetylmuramoyl-tripeptide--D-alanyl-D- alanine ligase
1	4386909	4387860	IFR553	1	Genbank	CDS	4386554	4387912	murF	-	.	ecl8_04225	murF	UDP-N-acetylmuramoyl-tripeptide--D-alanyl-D- alanine ligase
1	4387861	4389023	IFR554	1	Genbank	CDS	4386554	4387912	murF	-	.	ecl8_04225	murF	UDP-N-acetylmuramoyl-tripeptide--D-alanyl-D- alanine ligase
1	4387861	4389023	IFR554	1	Genbank	CDS	4387909	4389396	murE	-	.	ecl8_04226	murE	UDP-N-acetylmuramoyl-L-alanyl-D-glutamate--2, 6-diaminopimelate ligase
1	4389024	4389425	IFR555	1	Genbank	CDS	4387909	4389396	murE	-	.	ecl8_04226	murE	UDP-N-acetylmuramoyl-L-alanyl-D-glutamate--2, 6-diaminopimelate ligase
1	4389024	4389425	IFR555	1	Genbank	CDS	4389383	4391149	ftsI_2	-	.	ecl8_04227	ftsI_2	Peptidoglycan D,D-transpeptidase FtsI
1	4389426	4391150	IFR556	1	Genbank	CDS	4389383	4391149	ftsI_2	-	.	ecl8_04227	ftsI_2	Peptidoglycan D,D-transpeptidase FtsI
1	4391228	4391533	IFR557	1	Genbank	CDS	4391165	4391530	ftsL	-	.	ecl8_04228	ftsL	Cell division protein FtsL
1	4391228	4391533	IFR557	1	Genbank	CDS	4391527	4392468	rsmH	-	.	ecl8_04229	rsmH	Ribosomal RNA small subunit methyltransferase H
1	4391945	4392192	IFR558	1	Genbank	CDS	4391527	4392468	rsmH	-	.	ecl8_04229	rsmH	Ribosomal RNA small subunit methyltransferase H
1	4392193	4392501	IFR559	1	Genbank	CDS	4391527	4392468	rsmH	-	.	ecl8_04229	rsmH	Ribosomal RNA small subunit methyltransferase H
1	4392193	4392501	IFR559	1	Genbank	CDS	4392471	4392929	mraZ	-	.	ecl8_04230	mraZ	Transcriptional regulator MraZ
1	4392793	4393004	IFR560	1	Genbank	CDS	4392471	4392929	mraZ	-	.	ecl8_04230	mraZ	Transcriptional regulator MraZ
1	4436835	4439120	IFR561	1	Genbank	CDS	4436849	4439197	lptD	+	.	ecl8_04264	lptD	LPS-assembly protein LptD
1	4443844	4444317	IFR562	1	Genbank	CDS	4443836	4444315	folA	-	.	ecl8_04270	folA	Dihydrofolate reductase
1	4452317	4453088	IFR563	1	Genbank	CDS	4452263	4453084	dapB	-	.	ecl8_04276	dapB	4-hydroxy-tetrahydrodipicolinate reductase
1	4458330	4458562	IFR565	1	Genbank	CDS	4458252	4459592	citS	+	.	ecl8_04282	citS	Citrate-sodium symporter
1	4468651	4469583	IFR566	1	Genbank	CDS	4468601	4469551	ispH	-	.	ecl8_04292	ispH	4-hydroxy-3-methylbut-2-enyl diphosphate reductase
1	4468651	4469583	IFR566	1	Genbank	CDS	4469553	4470002	fkpB	-	.	ecl8_04293	fkpB	FKBP-type 16 kDa peptidyl-prolyl cis-trans isomerase
1	4470103	4473486	IFR567	1	Genbank	CDS	4470118	4470618	lspA_1	-	.	ecl8_04294	lspA_1	Lipoprotein signal peptidase
1	4470103	4473486	IFR567	1	Genbank	CDS	4473478	4474416	ribF	-	.	ecl8_04296	ribF	Riboflavin biosynthesis protein RibF
1	4470103	4473486	IFR567	1	Genbank	CDS	4470618	4473470	ileS	-	.	ecl8_04295	ileS	Isoleucine--tRNA ligase
1	4473487	4473770	IFR568	1	Genbank	CDS	4473478	4474416	ribF	-	.	ecl8_04296	ribF	Riboflavin biosynthesis protein RibF
1	4473819	4474420	IFR569	1	Genbank	CDS	4473478	4474416	ribF	-	.	ecl8_04296	ribF	Riboflavin biosynthesis protein RibF
1	4474535	4474990	IFR570	1	Genbank	CDS	4474761	4474970	ecl8_04297	-	.	ecl8_04297	ecl8_04297	hypothetical protein
1	4479288	4479470	IFR571	1	Genbank	CDS	4478654	4480570	dnaK_2	-	.	ecl8_04301	dnaK_2	Chaperone protein DnaK
1	4479843	4480016	IFR572	1	Genbank	CDS	4478654	4480570	dnaK_2	-	.	ecl8_04301	dnaK_2	Chaperone protein DnaK
1	4480165	4480373	IFR573	1	Genbank	CDS	4478654	4480570	dnaK_2	-	.	ecl8_04301	dnaK_2	Chaperone protein DnaK
1	4536763	4537304	IFR574	1	Genbank	CDS	4536768	4537307	dnaT	+	.	ecl8_04360	dnaT	Primosomal protein 1
1	4536763	4537304	IFR574	1	Genbank	CDS	4537304	4538047	dnaC	+	.	ecl8_04361	dnaC	DNA replication protein DnaC
1	4537305	4537594	IFR575	1	Genbank	CDS	4536768	4537307	dnaT	+	.	ecl8_04360	dnaT	Primosomal protein 1
1	4537305	4537594	IFR575	1	Genbank	CDS	4537304	4538047	dnaC	+	.	ecl8_04361	dnaC	DNA replication protein DnaC
1	4537595	4537835	IFR576	1	Genbank	CDS	4537304	4538047	dnaC	+	.	ecl8_04361	dnaC	DNA replication protein DnaC
1	4537836	4538033	IFR577	1	Genbank	CDS	4537304	4538047	dnaC	+	.	ecl8_04361	dnaC	DNA replication protein DnaC
1	4558351	4558503	IFR578	1	Genbank	CDS	4558485	4558748	ecl8_04381	+	.	ecl8_04381	ecl8_04381	hypothetical protein
1	4573331	4573528	IFR579	1	Genbank	CDS	4572547	4573368	ecl8_04397	-	.	ecl8_04397	ecl8_04397	hypothetical protein
1	4573331	4573528	IFR579	1	Genbank	CDS	4573385	4574008	ecl8_04398	-	.	ecl8_04398	ecl8_04398	hypothetical protein
1	4647947	4648319	IFR582	1	Genbank	CDS	4648194	4649309	ecl8_04468	+	.	ecl8_04468	ecl8_04468	hypothetical protein
1	4710288	4712131	IFR583	1	Genbank	CDS	4710259	4711341	lptG	-	.	ecl8_04519	lptG	Lipopolysaccharide export system permease protein LptG
1	4710288	4712131	IFR583	1	Genbank	CDS	4711341	4712438	lptF	-	.	ecl8_04520	lptF	Lipopolysaccharide export system permease protein LptF
1	4712132	4712592	IFR584	1	Genbank	CDS	4711341	4712438	lptF	-	.	ecl8_04520	lptF	Lipopolysaccharide export system permease protein LptF
1	4714762	4715019	IFR585	1	Genbank	CDS	4714461	4714904	holC	+	.	ecl8_04522	holC	DNA polymerase III subunit chi
1	4714762	4715019	IFR585	1	Genbank	CDS	4714904	4717759	valS	+	.	ecl8_04523	valS	Valine--tRNA ligase
1	4715020	4717745	IFR586	1	Genbank	CDS	4714904	4717759	valS	+	.	ecl8_04523	valS	Valine--tRNA ligase
1	4766758	4767330	IFR587	1	Genbank	CDS	4766796	4767326	ppa_2	+	.	ecl8_04569	ppa_2	Inorganic pyrophosphatase
1	4794558	4795069	IFR588	1	Genbank	CDS	4794533	4794760	rpsR	-	.	ecl8_04594	rpsR	30S ribosomal protein S18
1	4794558	4795069	IFR588	1	Genbank	CDS	4794765	4795079	priB	-	.	ecl8_04595	priB	Primosomal replication protein N
1	4795176	4795629	IFR589	1	Genbank	CDS	4795085	4795480	rpsF	-	.	ecl8_04596	rpsF	30S ribosomal protein S6
1	4802126	4802276	IFR590	1	Genbank	CDS	4802275	4803339	ulaG	+	.	ecl8_04605	ulaG	putative L-ascorbate-6-phosphate lactonase UlaG
1	4821959	4822377	IFR591	1	Genbank	CDS	4821925	4822386	tsaE	-	.	ecl8_04624	tsaE	tRNA threonylcarbamoyladenosine biosynthesis protein TsaE
1	4826975	4827170	IFR593	1	Genbank	CDS	4826751	4827296	orn	-	.	ecl8_04631	orn	Oligoribonuclease
1	4827372	4827605	IFR594	1	Genbank	CDS	4827391	4828452	rsgA	+	.	ecl8_04632	rsgA	Small ribosomal subunit biogenesis GTPase RsgA
1	4827681	4828421	IFR595	1	Genbank	CDS	4827391	4828452	rsgA	+	.	ecl8_04632	rsgA	Small ribosomal subunit biogenesis GTPase RsgA
1	4828660	4828929	IFR596	1	Genbank	CDS	4828613	4829575	psd	+	.	ecl8_04633	psd	Phosphatidylserine decarboxylase proenzyme
1	4828930	4829101	IFR597	1	Genbank	CDS	4828613	4829575	psd	+	.	ecl8_04633	psd	Phosphatidylserine decarboxylase proenzyme
1	4829102	4829414	IFR598	1	Genbank	CDS	4828613	4829575	psd	+	.	ecl8_04633	psd	Phosphatidylserine decarboxylase proenzyme
1	4843241	4843423	IFR599	1	Genbank	CDS	4842571	4843245	ecl8_04647	-	.	ecl8_04647	ecl8_04647	hypothetical protein
1	4848246	4848573	IFR600	1	Genbank	CDS	4847603	4848637	ecl8_04651	+	.	ecl8_04651	ecl8_04651	hypothetical protein
1	4850120	4850352	IFR601	1	Genbank	CDS	4849743	4851029	cvaA	+	.	ecl8_04654	cvaA	Colicin V secretion protein CvaA
1	4850765	4850928	IFR602	1	Genbank	CDS	4849743	4851029	cvaA	+	.	ecl8_04654	cvaA	Colicin V secretion protein CvaA
1	4854842	4856009	IFR603	1	Genbank	CDS	4854690	4856336	groL	-	.	ecl8_04658	groL	60 kDa chaperonin
1	4856010	4856355	IFR604	1	Genbank	CDS	4854690	4856336	groL	-	.	ecl8_04658	groL	60 kDa chaperonin
1	4856381	4856712	IFR605	1	Genbank	CDS	4856374	4856667	groS	-	.	ecl8_04659	groS	10 kDa chaperonin
1	4939916	4940174	IFR607	1	Genbank	CDS	4939578	4939931	iraM	-	.	ecl8_04737	iraM	Anti-adapter protein IraM
1	4950516	4950697	IFR609	1	Genbank	CDS	4950509	4951033	ssb	-	.	ecl8_04743	ssb	Single-stranded DNA-binding protein
1	4950698	4950874	IFR610	1	Genbank	CDS	4950509	4951033	ssb	-	.	ecl8_04743	ssb	Single-stranded DNA-binding protein
1	4950875	4951108	IFR611	1	Genbank	CDS	4950509	4951033	ssb	-	.	ecl8_04743	ssb	Single-stranded DNA-binding protein
1	4958419	4959828	IFR612	1	Genbank	CDS	4958403	4959818	dnaB	-	.	ecl8_04750	dnaB	Replicative DNA helicase
1	4965828	4966424	IFR613	1	Genbank	CDS	4965814	4966422	lexA_2	-	.	ecl8_04758	lexA_2	LexA repressor
1	4967047	4967307	IFR614	1	Genbank	CDS	4967042	4969465	plsB	+	.	ecl8_04760	plsB	Glycerol-3-phosphate acyltransferase
1	4967308	4969410	IFR615	1	Genbank	CDS	4967042	4969465	plsB	+	.	ecl8_04760	plsB	Glycerol-3-phosphate acyltransferase
1	4969682	4970043	IFR616	1	Genbank	CDS	4969514	4970380	ubiA	-	.	ecl8_04761	ubiA	4-hydroxybenzoate octaprenyltransferase
1	4970044	4970344	IFR617	1	Genbank	CDS	4969514	4970380	ubiA	-	.	ecl8_04761	ubiA	4-hydroxybenzoate octaprenyltransferase
1	5024625	5025591	IFR619	1	Genbank	CDS	5024530	5025594	hemE	-	.	ecl8_04811	hemE	Uroporphyrinogen decarboxylase
1	5037219	5038977	IFR620	1	Genbank	CDS	5037058	5041281	rpoC	-	.	ecl8_04824	rpoC	DNA-directed RNA polymerase subunit beta'
1	5038978	5039916	IFR621	1	Genbank	CDS	5037058	5041281	rpoC	-	.	ecl8_04824	rpoC	DNA-directed RNA polymerase subunit beta'
1	5039944	5041291	IFR622	1	Genbank	CDS	5037058	5041281	rpoC	-	.	ecl8_04824	rpoC	DNA-directed RNA polymerase subunit beta'
1	5041381	5042858	IFR623	1	Genbank	CDS	5041358	5045386	rpoB	-	.	ecl8_04825	rpoB	DNA-directed RNA polymerase subunit beta
1	5042859	5044736	IFR624	1	Genbank	CDS	5041358	5045386	rpoB	-	.	ecl8_04825	rpoB	DNA-directed RNA polymerase subunit beta
1	5044737	5045478	IFR625	1	Genbank	CDS	5041358	5045386	rpoB	-	.	ecl8_04825	rpoB	DNA-directed RNA polymerase subunit beta
1	5045639	5046844	IFR626	1	Genbank	CDS	5045711	5046076	rplL	-	.	ecl8_04826	rplL	50S ribosomal protein L7/L12
1	5045639	5046844	IFR626	1	Genbank	CDS	5046143	5046640	rplJ	-	.	ecl8_04827	rplJ	50S ribosomal protein L10
1	5047104	5048307	IFR627	1	Genbank	CDS	5047054	5047758	rplA	-	.	ecl8_04828	rplA	50S ribosomal protein L1
1	5047104	5048307	IFR627	1	Genbank	CDS	5047762	5048190	rplK	-	.	ecl8_04829	rplK	50S ribosomal protein L11
1	5048434	5048581	IFR628	1	Genbank	CDS	5048347	5048892	nusG	-	.	ecl8_04830	nusG	Transcription termination/antitermination protein NusG
1	5048582	5048900	IFR629	1	Genbank	CDS	5048347	5048892	nusG	-	.	ecl8_04830	nusG	Transcription termination/antitermination protein NusG
1	5048582	5048900	IFR629	1	Genbank	CDS	5048894	5049277	secE	-	.	ecl8_04831	secE	Protein translocase subunit SecE
1	5048902	5049354	IFR630	1	Genbank	CDS	5048894	5049277	secE	-	.	ecl8_04831	secE	Protein translocase subunit SecE
1	5051815	5052038	IFR631	1	Genbank	CDS	5051808	5052734	coaA	+	.	ecl8_04837	coaA	Pantothenate kinase
1	5052039	5052236	IFR632	1	Genbank	CDS	5051808	5052734	coaA	+	.	ecl8_04837	coaA	Pantothenate kinase
1	5052237	5052703	IFR633	1	Genbank	CDS	5051808	5052734	coaA	+	.	ecl8_04837	coaA	Pantothenate kinase
1	5052902	5053702	IFR634	1	Genbank	CDS	5052760	5053722	birA_2	-	.	ecl8_04838	birA_2	Bifunctional ligase/repressor BirA
1	5053759	5054210	IFR635	1	Genbank	CDS	5053719	5054747	murB	-	.	ecl8_04839	murB	UDP-N-acetylenolpyruvoylglucosamine reductase
1	5054211	5054741	IFR636	1	Genbank	CDS	5053719	5054747	murB	-	.	ecl8_04839	murB	UDP-N-acetylenolpyruvoylglucosamine reductase
1	5069172	5069351	IFR637	1	Genbank	CDS	5069125	5070600	ubiD	-	.	ecl8_04852	ubiD	3-octaprenyl-4-hydroxybenzoate carboxy-lyase
1	5069352	5069593	IFR638	1	Genbank	CDS	5069125	5070600	ubiD	-	.	ecl8_04852	ubiD	3-octaprenyl-4-hydroxybenzoate carboxy-lyase
1	5070263	5070431	IFR639	1	Genbank	CDS	5069125	5070600	ubiD	-	.	ecl8_04852	ubiD	3-octaprenyl-4-hydroxybenzoate carboxy-lyase
1	5074024	5074283	IFR640	1	Genbank	CDS	5073803	5075443	ubiB	-	.	ecl8_04858	ubiB	putative protein kinase UbiB
1	5074284	5074584	IFR641	1	Genbank	CDS	5073803	5075443	ubiB	-	.	ecl8_04858	ubiB	putative protein kinase UbiB
1	5074702	5075447	IFR642	1	Genbank	CDS	5073803	5075443	ubiB	-	.	ecl8_04858	ubiB	putative protein kinase UbiB
1	5074702	5075447	IFR642	1	Genbank	CDS	5075440	5076045	ecl8_04859	-	.	ecl8_04859	ecl8_04859	hypothetical protein
1	5076244	5076682	IFR643	1	Genbank	CDS	5076059	5076814	ubiE	-	.	ecl8_04860	ubiE	Ubiquinone/menaquinone biosynthesis C-methyltransferase UbiE
1	5103829	5104703	IFR644	1	Genbank	CDS	5103774	5104730	hemC	+	.	ecl8_04885	hemC	Porphobilinogen deaminase
1	5104704	5104941	IFR645	1	Genbank	CDS	5103774	5104730	hemC	+	.	ecl8_04885	hemC	Porphobilinogen deaminase
1	5104704	5104941	IFR645	1	Genbank	CDS	5104727	5105467	hemD	+	.	ecl8_04886	hemD	Uroporphyrinogen-III synthase
1	5104942	5105448	IFR646	1	Genbank	CDS	5104727	5105467	hemD	+	.	ecl8_04886	hemD	Uroporphyrinogen-III synthase
1	5123491	5124684	IFR647	1	Genbank	CDS	5123484	5124743	rho	-	.	ecl8_04906	rho	Transcription termination factor Rho
1	5131560	5131877	IFR648	1	Genbank	CDS	5131502	5133523	rep_2	-	.	ecl8_04913	rep_2	ATP-dependent DNA helicase Rep
1	5131878	5132995	IFR649	1	Genbank	CDS	5131502	5133523	rep_2	-	.	ecl8_04913	rep_2	ATP-dependent DNA helicase Rep
1	5132996	5133176	IFR650	1	Genbank	CDS	5131502	5133523	rep_2	-	.	ecl8_04913	rep_2	ATP-dependent DNA helicase Rep
1	5133177	5133509	IFR651	1	Genbank	CDS	5131502	5133523	rep_2	-	.	ecl8_04913	rep_2	ATP-dependent DNA helicase Rep
1	5152547	5153396	IFR652	1	Genbank	CDS	5152541	5153392	murI	-	.	ecl8_04933	murI	Glutamate racemase
1	5152547	5153396	IFR652	1	Genbank	CDS	5153337	5155175	btuB	-	.	ecl8_04934	btuB	Vitamin B12 transporter BtuB
1	5182803	5183037	IFR653	1	Genbank	CDS	5182795	5184990	priA	+	.	ecl8_04959	priA	Primosomal protein N'
1	5183154	5184965	IFR654	1	Genbank	CDS	5182795	5184990	priA	+	.	ecl8_04959	priA	Primosomal protein N'
1	5186267	5186542	IFR655	1	Genbank	CDS	5186377	5187213	ftsN	+	.	ecl8_04961	ftsN	Cell division protein FtsN
1	5243056	5243674	IFR656	1	Genbank	CDS	5243089	5243721	engB	+	.	ecl8_05018	engB	putative GTP-binding protein EngB
1	5245997	5246822	IFR657	1	Genbank	CDS	5244069	5246861	polA	-	.	ecl8_05019	polA	DNA polymerase I
1	5273114	5273315	IFR659	1	Genbank	CDS	5272812	5274701	mnmG	+	.	ecl8_05044	mnmG	tRNA uridine 5-carboxymethylaminomethyl modification enzyme MnmG
1	5274113	5274302	IFR660	1	Genbank	CDS	5272812	5274701	mnmG	+	.	ecl8_05044	mnmG	tRNA uridine 5-carboxymethylaminomethyl modification enzyme MnmG
1	5283631	5284228	IFR661	1	Genbank	CDS	5283631	5285001	glmU	+	.	ecl8_05055	glmU	Bifunctional protein GlmU
1	5284229	5285038	IFR662	1	Genbank	CDS	5283631	5285001	glmU	+	.	ecl8_05055	glmU	Bifunctional protein GlmU
1	5285154	5287005	IFR663	1	Genbank	CDS	5285185	5287014	glmS_2	+	.	ecl8_05056	glmS_2	Glutamine--fructose-6-phosphate aminotransferase [isomerizing]
1	5302589	5302750	IFR664	1	Genbank	CDS	5302589	5303953	mnmE	-	.	ecl8_05072	mnmE	tRNA modification GTPase MnmE
1	5304222	5305336	IFR665	1	Genbank	CDS	5304148	5305794	yidC	-	.	ecl8_05073	yidC	Membrane protein insertase YidC
1	5305343	5305895	IFR666	1	Genbank	CDS	5304148	5305794	yidC	-	.	ecl8_05073	yidC	Membrane protein insertase YidC
1	5306044	5306740	IFR667	1	Genbank	CDS	5306144	5306341	ecl8_05074	+	.	ecl8_05074	ecl8_05074	hypothetical protein

## Sheet: 145_IFR_intergenic_Kleb
Figure 1-source data 2: Transposon Insertion free regions (IFR) that are significantly large enough to not have occurred by chance (p<0.05) mapped to intergenic regions with blastx results
			Upstream gene	downstream gene	US product	DS product	BLASTx Significance found	Description	Query cover (%)	E-value	Identity (%)	Accession	Comment
9588	9735	IFR6	ecl8_00007	lutR	hypothetical protein	HTH-type transcriptional regulator LutR	No significant similarity found
100625	100806	IFR7	xanP_1	gltS	Xanthine permease XanP	Sodium/glutamate symporter	No significant similarity found
583457	583833	IFR83	garK_1	ecl8_00561	Glycerate 2-kinase	hypothetical protein	No significant similarity found
643104	643272	IFR86	ecl8_00616	dhaB	hypothetical protein	Glycerol dehydratase large subunit		hypothetical protein SAMN03159434_104133	78	6e-60	0.9596	SLK02880.1
680334	680514	IFR97	yqiC	ribB	putative protein YqiC	3,4-dihydroxy-2-butanone 4-phosphate synthase	No significant similarity found
723402	723683	IFR106	cbs	ecl8_00698	Putative cystathionine beta-synthase	hypothetical protein		hypothetical protein KPN_03408	50	4e-25	100	ABR78804.1
820303	820474	IFR120	evgA_3	lpfC'	DNA-binding transcriptional activator EvgA	putative outer membrane usher protein LpfC'		hypothetical protein VK055_4179	56	1e-13	100	AIK82724.1
820556	820710	IFR121	evgA_3	lpfC'	DNA-binding transcriptional activator EvgA	putative outer membrane usher protein LpfC'	No significant similarity found
822834	823122	IFR122	esiB	hdeA	Secretory immunoglobulin A-binding protein EsiB	Acid stress chaperone HdeA	No significant similarity found
836624	836795	IFR123	amt	hdeB_3	Ammonia channel	Acid stress chaperone HdeB		hypothetical protein VK055_4197 [Klebsiella pneumoniae subsp. pneumoniae]	34	0.0007	95	AIK82742.1
965732	965932	IFR129	pduA_2	pduF	Propanediol utilization protein PduA	Propanediol diffusion facilitator		TPA: hypothetical protein [Klebsiella pneumoniae]	77	3e-23	96.15	HBY0749616.1
997980	998187	IFR131	fucP	fucA	L-fucose-proton symporter	L-fuculose phosphate aldolase		hypothetical protein KP13_31860	47	4e-13	96.97	AHE42926.1
1040313	1040466	IFR135	lgrD	queE	Linear gramicidin synthase subunit D	7-carboxy-7-deazaguanine synthase		hypothetical protein [Klebsiella pneumoniae]	89	1e-20	97.83	EIV7910337.1
1073723	1073872	IFR144	ecl8_01029	ecl8_01030	hypothetical protein	hypothetical protein		TPA: hypothetical protein [Klebsiella pneumoniae]	99	8e-13	100	HBQ3365233.1
1431286	1431438	IFR202	nupC_1	mntH	Nucleoside permease NupC	Divalent metal cation transporter MntH		hypothetical protein B8P98_08000 [Klebsiella quasivariicola]	86	1e-19	90.91	ASV19234.1
1606159	1606308	IFR225	bicA	mqo_1	Bicarbonate transporter BicA	Malate:quinone oxidoreductase		inorganic anion transporter sulfate permease (SulP) family [Klebsiella pneumoniae]	50	3e-10	100	VTO26682.1
1706068	1706221	IFR234	lsrR_2	mtlK	Transcriptional regulator LsrR	Mannitol 2-dehydrogenase		hypothetical protein KPNJ1_01816 [Klebsiella pneumoniae 30660/NJST258_1]	40	4e-05	100	AHM84222.1
1826732	1826935	IFR235	aaeA_2	ecl8_01733	p-hydroxybenzoic acid efflux pump subunit AaeA	hypothetical protein		helix-turn-helix domain-containing protein [Klebsiella pneumoniae]	76	2e-29	100	WP_227653830.1
1826987	1827285	IFR236	aaeA_2	ecl8_01733	p-hydroxybenzoic acid efflux pump subunit AaeA	hypothetical protein		marA2 [Klebsiella pneumoniae]	63	3e-38	100	CDO15409.1
1829824	1830034	IFR240	ecl8_01735	fabG_4	hypothetical protein	3-oxoacyl-[acyl-carrier-protein] reductase FabG		hypothetical protein [Klebsiella pneumoniae]	56	5e-20	100	MCP5939860.1
1858756	1858907	IFR241	ompN_1	yedR	Outer membrane protein N	Inner membrane protein YedR		hypothetical protein H253_0047 [Klebsiella pneumoniae KP-7]	45	0.0006	91.3	EOY63817.1
1882649	1882812	IFR245	ftnA_1	ecl8_01791	Bacterial non-heme ferritin	hypothetical protein		hypothetical protein C1662_09340 [Klebsiella pneumoniae]	84	6e-20	95.65	POL36715.1
2020191	2020374	IFR261	ecl8_01919	ecl8_01920	hypothetical protein	hypothetical protein		hypothetical protein BME59_23265 [Klebsiella pneumoniae]	88	7e-29	100	OVV95700.1
2030613	2031247	IFR272	ecl8_01925	ecl8_01926	hypothetical protein	hypothetical protein		Uncharacterised protein [Klebsiella pneumoniae]	80	9e-99	96.47	SXL75040.1
2110496	2110648	IFR283	ecl8_01998	ecl8_01999	hypothetical protein	hypothetical protein		hypothetical protein [Klebsiella pneumoniae]	86	2e-22	100	WP_071820800.1
2139944	2140153	IFR289	ppsR	ppsA	Phosphoenolpyruvate synthase regulatory protein	Phosphoenolpyruvate synthase		TPA: hypothetical protein [Klebsiella pneumoniae]	72	8e-26	96.08	HBQ5151032.1
2448690	2448928	IFR308	fdnI	ecl8_02343	Formate dehydrogenase, nitrate-inducible, cytochrome b556(Fdn) subunit	Polyphosphate:ADP phosphotransferase 3		hypothetical protein [Klebsiella pneumoniae]	75	6e-32	95	WP_117248418.1
2448955	2449106	IFR309	fdnI	ecl8_02343	Formate dehydrogenase, nitrate-inducible, cytochrome b556(Fdn) subunit	Polyphosphate:ADP phosphotransferase 3		hypothetical protein [Klebsiella pneumoniae]	55	1e-09	96.43	WP_265325301.1
2471654	2472020	IFR310	yghA	ecl8_02364	putative oxidoreductase YghA	hypothetical protein		hypothetical protein [Klebsiella pneumoniae]	49	1e-31	95	WP_227666915.1
2472256	2472482	IFR311	yghA	ecl8_02364	putative oxidoreductase YghA	hypothetical protein		hypothetical protein [Klebsiella pneumoniae]	79	2e-33	98.33	MBE8877586.1
2481517	2481687	IFR315	fieF_1	ecl8_02378	Ferrous-iron efflux pump FieF	hypothetical protein		hypothetical protein [Klebsiella pneumoniae]	89	2e-28	100	WP_187576819.1
2606710	2606855	IFR324	ecl8_02498	ykkC	hypothetical protein	Multidrug resistance protein YkkC		LysR family transcriptional regulator [Klebsiella pneumoniae]	69	2e-13	100	WP_240028373.1
2770313	2770478	IFR339	mqo_2	murQ_2	Malate:quinone oxidoreductase	N-acetylmuramic acid 6-phosphate etherase	No significant similarity found
2778265	2778538	IFR340	fccA	ttdT	Fumarate reductase flavoprotein subunit	L-tartrate/succinate antiporter		hypothetical protein [Klebsiella pneumoniae]	73	1e-33	95.52	WP_208893291.1
2778539	2778762	IFR341	fccA	ttdT	Fumarate reductase flavoprotein subunit	L-tartrate/succinate antiporter		hypothetical protein [Klebsiella pneumoniae]	77	7e-32	100	WP_219928537.1
2913065	2913240	IFR349	metQ_4	dapL	putative D-methionine-binding lipoprotein MetQ	LL-diaminopimelate aminotransferase		hypothetical protein EJ501_27645 [Klebsiella pneumoniae subsp. pneumoniae]	99	5e-28	98.08	RTA61898.1
2951651	2951809	IFR351	ecl8_02838	yraA	hypothetical protein	Putative cysteine protease YraA		TPA: hypothetical protein [Klebsiella pneumoniae]	52	2e-08	100	HBT9649226.1
2963120	2963399	IFR356	ecl8_02849	mppA	hypothetical protein	Periplasmic murein peptide-binding protein	No significant similarity found
3006697	3006866	IFR365	ymiA	cysB	putative protein YmiA	HTH-type transcriptional regulator CysB		Uncharacterised protein [Klebsiella pneumoniae]	49	1e-08	96.43	SYQ71150.1
3125587	3125827	IFR373	ecl8_03013	ecl8_03014	hypothetical protein	putative zinc-binding alcohol dehydrogenase		TPA: hypothetical protein [Klebsiella pneumoniae]	99	1e-33	76	HBX7674095.1
3138927	3139081	IFR378	icd_2	rluE	Isocitrate dehydrogenase [NADP]	Ribosomal large subunit pseudouridine synthase E		hypothetical protein HMPREF9538_06138 [Klebsiella sp. MS 92-3]	90	9e-24	97.87	EGF56373.1
3203507	3203727	IFR391	rluC	rne	Ribosomal large subunit pseudouridine synthase C	Ribonuclease E		hypothetical protein DD590_15975 [Klebsiella pneumoniae]	74	2e-32	100	RXX70695.1
3335996	3336166	IFR405	asnS	yedS	Asparagine--tRNA ligase	Outer membrane protein YedS		hypothetical protein UUU_13490 [Klebsiella pneumoniae subsp. pneumoniae DSM 30104 = JCM 1662 = NBRC 14940]	77	4e-22	97.73	EJK92008.1
3479719	3479956	IFR437	ecl8_03348	rafB_1	hypothetical protein	Raffinose permease	No significant similarity found
3614791	3614949	IFR439	cydA_2	sucD	Cytochrome bd-I ubiquinol oxidase subunit 1	Succinate--CoA ligase [ADP-forming] subunit alpha		hypothetical protein [Klebsiella quasipneumoniae]	45	0.016	83.33	WP_218811167.1
3713988	3714199	IFR464	dmsA_2	ytfQ_1	Dimethyl sulfoxide/trimethylamine N-oxide reductase	ABC transporter periplasmic-binding protein YtfQ		hypothetical protein [Klebsiella variicola]	0.87	5e-20	0.7097	WP_048964687.1
3884194	3884354	IFR469	thpA_2	rbsB_3	D-threitol-binding protein	Ribose import binding protein RbsB		hypothetical protein [Klebsiella michiganensis]	0.63	1e-07	0.7647	WP_220998228.1
4014406	4014557	IFR486	lacI_2	lamB_2	Lactose operon repressor	Maltoporin	No significant similarity found
4030537	4030706	IFR487	ecl8_03892	ecl8_03893	hypothetical protein	hypothetical protein		hypothetical protein KP13_32129 [Klebsiella pneumoniae subsp. pneumoniae Kp13]	0.72	5e-21	0.9756	AHE45998.1
4030843	4031010	IFR488	ecl8_03892	ecl8_03893	hypothetical protein	hypothetical protein		hypothetical protein KP13_32130 [Klebsiella pneumoniae subsp. pneumoniae Kp13]	0.99	2e-29	1	AHE45999.1
4458093	4458249	IFR564	citC	citS	[Citrate [pro-3S]-lyase] ligase	Citrate-sodium symporter		citrate carrier protein, CCS family [Klebsiella pneumoniae subsp. pneumoniae DSM 30104 = JCM 1662 = NBRC 14940]	0.51	8e-08	0.963	EJK92508.1
4633895	4634044	IFR580	lamB_3	xylA_2	Maltoporin	Xylose isomerase		hypothetical protein UUU_03560 [Klebsiella pneumoniae subsp. pneumoniae DSM 30104 = JCM 1662 = NBRC 14940]	0.9	2e-22	0.9778	EJK92693.1
4641207	4641386	IFR581	glpQ1	potA_5	putative glycerophosphodiester phosphodiesterase 1	Spermidine/putrescine import ATP-binding protein PotA	No significant similarity found
4825683	4825919	IFR592	ecl8_04629	artJ_3	tRNA-Gly	ABC transporter arginine-binding protein 1		hypothetical protein C4Z12_018680 [Klebsiella pneumoniae subsp. pneumoniae]	0.69	4e-31	1	ROD43426.1
4870569	4870806	IFR606	ecl8_04672	pgaA	hypothetical protein	Poly-beta-1,6-N-acetyl-D-glucosamine export protein		hypothetical protein [Klebsiella variicola]	0.61	1e-12	0.7755	WP_213936010.1
4948507	4948653	IFR608	fepA_2	mltF_2	Ferrienterobactin receptor	Membrane-bound lytic murein transglycosylase F	No significant similarity found
5008190	5008351	IFR618	aceB	metAS	Malate synthase A	Homoserine O-succinyltransferase		hypothetical protein ATN83_4978 [Raoultella ornithinolytica]	1	4e-14	0.7037	ALQ49087.1
5272521	5272681	IFR658	mioC	mnmG	Protein MioC	tRNA uridine 5-carboxymethylaminomethyl modification enzyme MnmG		hypothetical protein UUU_42950 [Klebsiella pneumoniae subsp. pneumoniae DSM 30104 = JCM 1662 = NBRC 14940]	0.59	1e-12	1	EJK89054.1

## Sheet: CDS lookup table
source	1	5307154		product	locus tag
dnaA	70	1404		Chromosomal replication initiator protein DnaA	ecl8_00001
dnaN	1409	2509		Beta sliding clamp	ecl8_00002
recF_1	2656	3729		DNA replication and repair protein RecF	ecl8_00003
gyrB	3758	6172		DNA gyrase subunit B	ecl8_00004
yidA	6373	7185		Sugar phosphatase YidA	ecl8_00005
ecl8_00006	7356	8417		hypothetical protein	ecl8_00006
ecl8_00007	8414	9547		hypothetical protein	ecl8_00007
lutR	9777	10466		HTH-type transcriptional regulator LutR	ecl8_00008
dgoK1_1	10463	11341		putative 2-dehydro-3-deoxygalactonokinase DgoK1	ecl8_00009
dgoA_1	11325	11942		2-dehydro-3-deoxy-6-phosphogalactonate aldolase	ecl8_00010
dgoD	11939	13087		D-galactonate dehydratase	ecl8_00011
dgoT_1	13310	14602		D-galactonate transporter	ecl8_00012
ecl8_00013	14654	15880		hypothetical protein	ecl8_00013
ecl8_00014	15882	16214	c	hypothetical protein	ecl8_00014
ibpA_1	16529	16942		Small heat shock protein IbpA	ecl8_00015
ibpB	17059	17487		Small heat shock protein IbpB	ecl8_00016
ecl8_00017	17624	18019		hypothetical protein	ecl8_00017
ecl8_00018	17999	18169	c	hypothetical protein	ecl8_00018
aspT_1	18550	20211		Aspartate/alanine antiporter	ecl8_00019
mngR_1	20203	20925	c	Mannosyl-D-glycerate transport/metabolism system repressor MngR	ecl8_00020
malP_1	21224	22846		PTS system maltose-specific EIICB component	ecl8_00021
aglB	22843	24165		6-phospho-alpha-glucosidase	ecl8_00022
yidH	24267	24614		Inner membrane protein YidH	ecl8_00023
yidG	24604	24966		Inner membrane protein YidG	ecl8_00024
chuR_1	24963	25463		Anaerobic sulfatase-maturating enzyme	ecl8_00025
dsdA	25467	26795	c	D-serine dehydratase	ecl8_00026
dsdX	26813	28150	c	D-serine transporter DsdX	ecl8_00027
dsdC_1	28376	29299		HTH-type transcriptional regulator DsdC	ecl8_00028
emrD	29459	30643	c	Multidrug resistance protein D	ecl8_00029
ecl8_00030	30819	31652	c	hypothetical protein	ecl8_00030
ecl8_00031	31720	32166	c	hypothetical protein	ecl8_00031
ecl8_00032	32257	32346	c	hypothetical protein	ecl8_00032
ecl8_00033	33009	33104		hypothetical protein	ecl8_00033
ilvB	33209	34897		Acetolactate synthase isozyme 1 large subunit	ecl8_00034
ilvN	34901	35188		Acetolactate synthase isozyme 1 small subunit	ecl8_00035
uhpA_1	35339	35932		Transcriptional regulatory protein UhpA	ecl8_00036
uhpB	35929	37431		Signal transduction histidine-protein kinase/phosphatase UhpB	ecl8_00037
uhpC	37443	38771		Membrane sensor protein UhpC	ecl8_00038
uhpT	38917	40308		Hexose-6-phosphate:phosphate antiporter	ecl8_00039
ecl8_00040	40445	40897		hypothetical protein	ecl8_00040
higA-2	41026	41349	c	Antitoxin HigA-2	ecl8_00041
ecl8_00042	41333	41692	c	hypothetical protein	ecl8_00042
nepI_1	41904	43097		Purine ribonucleoside efflux pump NepI	ecl8_00043
phnX	43094	43903	c	Phosphonoacetaldehyde hydrolase	ecl8_00044
phnW	43913	45016	c	2-aminoethylphosphonate--pyruvate transaminase	ecl8_00045
phnR	45158	45877		Putative transcriptional regulator of 2-aminoethylphosphonate degradation operons	ecl8_00046
phnS	46056	47069		Putative 2-aminoethylphosphonate-binding periplasmic protein	ecl8_00047
phnT	47075	48187		Putative 2-aminoethylphosphonate import ATP-binding protein PhnT	ecl8_00048
phnU	48187	49047		Putative 2-aminoethylphosphonate transport system permease protein PhnU	ecl8_00049
phnV_1	49050	49847		Putative 2-aminoethylphosphonate transport system permease protein PhnV	ecl8_00050
lamB_1	50215	51594	c	Maltoporin	ecl8_00051
chbA_1	51739	52041	c	PTS system N,N'-diacetylchitobiose-specific EIIA component	ecl8_00052
licC_1	52139	53461	c	Lichenan permease IIC component	ecl8_00053
celA_1	53473	53787	c	PTS system cellobiose-specific EIIB component	ecl8_00054
ascG_1	54078	55022		HTH-type transcriptional regulator AscG	ecl8_00055
pcaK_1	55234	56604		4-hydroxybenzoate transporter PcaK	ecl8_00056
galA_1	56618	57499		Gallate dioxygenase	ecl8_00057
galA_2	57503	57880		Gallate dioxygenase	ecl8_00058
gbpR_1	57877	59103	c	HTH-type transcriptional regulator GbpR	ecl8_00059
galB	59231	59971		4-oxalmesaconate hydratase	ecl8_00060
galC	59968	60681		4-carboxy-4-hydroxy-2-oxoadipic acid aldolase	ecl8_00061
galD	60682	61767		4-oxalomesaconate tautomerase	ecl8_00062
mmsB_1	61770	62633		3-hydroxyisobutyrate dehydrogenase	ecl8_00063
ecl8_00064	62637	62927	c	hypothetical protein	ecl8_00064
yicL	63034	63936	c	putative inner membrane transporter YicL	ecl8_00065
murP	64088	65521	c	PTS system N-acetylmuramic acid-specific EIIBC component	ecl8_00066
murQ_1	65546	66448	c	N-acetylmuramic acid 6-phosphate etherase	ecl8_00067
bcr_1	66611	67774	c	Bicyclomycin resistance protein	ecl8_00068
oprM_1	67820	69184	c	Outer membrane protein OprM	ecl8_00069
mexB	69188	72295	c	Multidrug resistance protein MexB	ecl8_00070
mexA	72295	73419	c	Multidrug resistance protein MexA	ecl8_00071
ecl8_00072	73799	74215		Acetyltransferase	ecl8_00072
ecl8_00073	74135	74620	c	hypothetical protein	ecl8_00073
luxR	74719	75366	c	HTH-type transcriptional regulator LuxR	ecl8_00074
bmr3	75447	76940		Multidrug resistance protein 3	ecl8_00075
dmlR_1	76937	77851	c	HTH-type transcriptional regulator DmlR	ecl8_00076
ecl8_00077	77947	78573		hypothetical protein	ecl8_00077
ecl8_00078	78576	79046		hypothetical protein	ecl8_00078
ecl8_00079	79067	79603	c	hypothetical protein	ecl8_00079
rclR_1	79720	80625		RCS-specific HTH-type transcriptional activator RclR	ecl8_00080
nlpA	80754	81563		Lipoprotein 28	ecl8_00081
ecl8_00082	81588	82442		hypothetical protein	ecl8_00082
act	82432	82992	c	Methanol dehydrogenase activator	ecl8_00083
ecl8_00084	83158	83937		hypothetical protein	ecl8_00084
cdhR_1	83959	84912		HTH-type transcriptional regulator CdhR	ecl8_00085
yahK	84909	85958	c	Aldehyde reductase YahK	ecl8_00086
ecl8_00087	86331	87029		hypothetical protein	ecl8_00087
ycnE	87080	87370	c	Putative monooxygenase YcnE	ecl8_00088
ecl8_00089	87372	88379	c	Zinc-type alcohol dehydrogenase-like protein	ecl8_00089
ecl8_00090	88492	88959	c	hypothetical protein	ecl8_00090
ecl8_00091	89126	89220	c	tRNA-Sec	ecl8_00091
yicJ_1	89513	90907		Inner membrane symporter YicJ	ecl8_00092
yicI	90920	93238		Alpha-xylosidase	ecl8_00093
glvR_1	93394	94116		HTH-type transcriptional regulator GlvR	ecl8_00094
bglT	94163	95542	c	6-phospho-beta-glucosidase BglT	ecl8_00095
malP_2	95555	97114	c	PTS system maltose-specific EIICB component	ecl8_00096
ecl8_00097	97360	99075	c	hypothetical protein	ecl8_00097
xanP_1	99216	100607	c	Xanthine permease XanP	ecl8_00098
gltS	100892	102094		Sodium/glutamate symporter	ecl8_00099
glpK_1	102209	103720	c	Glycerol kinase	ecl8_00100
glpF_1	103742	104593	c	Glycerol uptake facilitator protein	ecl8_00101
zapB	105042	105281		Cell division protein ZapB	ecl8_00102
sbp	105433	106422		Sulfate-binding protein	ecl8_00103
cdh	106591	107355		CDP-diacylglycerol pyrophosphatase	ecl8_00104
ecl8_00105	107420	108724		hypothetical protein	ecl8_00105
tpiA	108817	109584	c	Triosephosphate isomerase	ecl8_00106
ecl8_00107	109694	110296	c	hypothetical protein	ecl8_00107
ecl8_00108	110409	110837		hypothetical protein	ecl8_00108
fpr	110838	111584	c	Flavodoxin/ferredoxin--NADP reductase	ecl8_00109
glpX	111735	112745	c	Fructose-1,6-bisphosphatase 1 class 2	ecl8_00110
recG	112796	114877	c	ATP-dependent DNA helicase RecG	ecl8_00111
trmH	114883	115572	c	tRNA (guanosine(18)-2'-O)-methyltransferase	ecl8_00112
spoT	115577	117697	c	Bifunctional (p)ppGpp synthase/hydrolase SpoT	ecl8_00113
rpoZ	117716	117991	c	DNA-directed RNA polymerase subunit omega	ecl8_00114
gmk	118046	118669	c	Guanylate kinase	ecl8_00115
ligB	118928	120604		DNA ligase B	ecl8_00116
ecl8_00117	120610	121227	c	hypothetical protein	ecl8_00117
clcA_1	121503	122753		H(+)/Cl(-) exchange transporter ClcA	ecl8_00118
ada_1	122809	123867	c	Bifunctional transcriptional activator/DNA repair enzyme Ada	ecl8_00119
ecl8_00120	123870	124616	c	hypothetical protein	ecl8_00120
ecl8_00121	124799	125662	c	hypothetical protein	ecl8_00121
ecl8_00122	126162	127862		hypothetical protein	ecl8_00122
ecl8_00123	127952	128917		hypothetical protein	ecl8_00123
ybhF_1	128910	129827		putative multidrug ABC transporter ATP-binding protein YbhF	ecl8_00124
ybhR_1	129859	130953		putative multidrug ABC transporter permease YbhR	ecl8_00125
rph	131050	131766		Ribonuclease PH	ecl8_00126
pyrE_1	131877	132518		Orotate phosphoribosyltransferase	ecl8_00127
gnl	132554	133570	c	Gluconolactonase	ecl8_00128
slmA	133746	134342	c	Nucleoid occlusion factor SlmA	ecl8_00129
dut	134467	134925	c	Deoxyuridine 5'-triphosphate nucleotidohydrolase	ecl8_00130
coaBC	134903	136120	c	Coenzyme A biosynthesis bifunctional protein CoaBC	ecl8_00131
ecl8_00132	136290	136955		hypothetical protein	ecl8_00132
rpmB	137172	137408		50S ribosomal protein L28	ecl8_00133
rpmG	137429	137596		50S ribosomal protein L33	ecl8_00134
mutM	137732	138541		Formamidopyrimidine-DNA glycosylase	ecl8_00135
coaD	138729	139208	c	Phosphopantetheine adenylyltransferase	ecl8_00136
ecl8_00137	139205	139981	c	hypothetical protein	ecl8_00137
waaA	139981	141255	c	3-deoxy-D-manno-octulosonic acid transferase	ecl8_00138
epsJ_1	141347	142336	c	putative glycosyltransferase EpsJ	ecl8_00139
pglJ	142366	143460	c	N-acetylgalactosamine-N, N'-diacetylbacillosaminyl-diphospho-undecaprenol 4-alpha-N-acetylgalactosaminyltransferase	ecl8_00140
rfaG	143463	144590	c	Lipopolysaccharide core biosynthesis protein RfaG	ecl8_00141
rfaQ	144587	145663	c	Lipopolysaccharide core heptosyltransferase RfaQ	ecl8_00142
ecl8_00143	145775	146728		hypothetical protein	ecl8_00143
epsJ_2	146729	147712	c	putative glycosyltransferase EpsJ	ecl8_00144
rfaL	147705	148955	c	O-antigen ligase	ecl8_00145
ecl8_00146	148939	150111	c	Glycogen synthase	ecl8_00146
rfaC	150111	151073	c	Lipopolysaccharide heptosyltransferase 1	ecl8_00147
rfaF	151077	152096	c	ADP-heptose--LPS heptosyltransferase 2	ecl8_00148
hldD	152145	153077	c	ADP-L-glycero-D-manno-heptose-6-epimerase	ecl8_00149
kbl	153291	154484		2-amino-3-ketobutyrate coenzyme A ligase	ecl8_00150
tdh	154497	155522		L-threonine 3-dehydrogenase	ecl8_00151
ecl8_00152	155692	156480		hypothetical protein	ecl8_00152
ecl8_00153	156486	157442	c	hypothetical protein	ecl8_00153
envC	157446	158702	c	Murein hydrolase activator EnvC	ecl8_00154
gpmI	158727	160271	c	2,3-bisphosphoglycerate-independent phosphoglycerate mutase	ecl8_00155
yibN	160517	160948		putative protein YibN	ecl8_00156
grxC	161053	161304		Glutaredoxin 3	ecl8_00157
secB	161365	161832		Protein-export protein SecB	ecl8_00158
gpsA	161832	162851		Glycerol-3-phosphate dehydrogenase [NAD(P)+]	ecl8_00159
cysE	162925	163746		Serine acetyltransferase	ecl8_00160
ecl8_00161	163800	164585	c	hypothetical protein	ecl8_00161
ecl8_00162	164642	165163	c	hypothetical protein	ecl8_00162
trmL	165298	165771	c	tRNA (cytidine(34)-2'-O)-methyltransferase	ecl8_00163
lldD_1	165864	167048	c	L-lactate dehydrogenase	ecl8_00164
lldR_1	167048	167821	c	Putative L-lactate dehydrogenase operon regulatory protein	ecl8_00165
lldP	167818	169473	c	L-lactate permease	ecl8_00166
yibL	169759	170121	c	putative protein YibL	ecl8_00167
ecl8_00168	170394	170618		hypothetical protein	ecl8_00168
mtlR	170607	171203	c	Mannitol operon repressor	ecl8_00169
mtlD	171203	172351	c	Mannitol-1-phosphate 5-dehydrogenase	ecl8_00170
mtlA	172452	174359	c	PTS system mannitol-specific EIICBA component	ecl8_00171
yibF_1	175326	175934		putative GST-like protein YibF	ecl8_00172
selA	176040	177428		L-seryl-tRNA(Sec) selenium transferase	ecl8_00173
selB	177425	179266		Selenocysteine-specific elongation factor	ecl8_00174
cooF	179511	179996		Iron-sulfur protein	ecl8_00175
avtA	180039	181295	c	Valine--pyruvate aminotransferase	ecl8_00176
malS	181466	183499	c	Periplasmic alpha-amylase	ecl8_00177
ecl8_00178	184069	184632		hypothetical protein	ecl8_00178
xylR	184671	185849	c	Xylose operon regulatory protein	ecl8_00179
xylH_1	186082	187263	c	Xylose transport system permease protein XylH	ecl8_00180
xylG_1	187241	188782	c	Xylose import ATP-binding protein XylG	ecl8_00181
xylF_1	188847	189842	c	D-xylose-binding periplasmic protein	ecl8_00182
xylA_1	190337	191659		Xylose isomerase	ecl8_00183
xylB_1	191752	193206		Xylulose kinase	ecl8_00184
yiaB	193375	193746		Inner membrane protein YiaB	ecl8_00185
yiaA	193781	194224		Inner membrane protein YiaA	ecl8_00186
wecH	194251	195246	c	O-acetyltransferase WecH	ecl8_00187
ecl8_00188	195423	195725		hypothetical protein	ecl8_00188
glyQ	195853	196764		Glycine--tRNA ligase alpha subunit	ecl8_00189
glyS	196774	198843		Glycine--tRNA ligase beta subunit	ecl8_00190
ecl8_00191	199139	199648		hypothetical protein	ecl8_00191
ecl8_00192	199615	199746	c	hypothetical protein	ecl8_00192
ecl8_00193	199783	200508		hypothetical protein	ecl8_00193
ecl8_00194	201270	201536		hypothetical protein	ecl8_00194
ecl8_00195	201524	202009		hypothetical protein	ecl8_00195
ecl8_00196	202334	203380	c	hypothetical protein	ecl8_00196
hokA_1	203454	203606		Protein HokA	ecl8_00197
yheS_1	203908	205527		putative ABC transporter ATP-binding protein YheS	ecl8_00198
cspA	205626	205838	c	Cold shock protein CspA	ecl8_00199
ecl8_00200	206090	206380	c	hypothetical protein	ecl8_00200
pcaK_2	206626	207981	c	4-hydroxybenzoate transporter PcaK	ecl8_00201
ecl8_00202	208422	209132		hypothetical protein	ecl8_00202
ghrB	209241	210212	c	Glyoxylate/hydroxypyruvate reductase B	ecl8_00203
ttuB_1	210237	211517	c	Putative tartrate transporter	ecl8_00204
kdgK_1	211622	212557	c	2-dehydro-3-deoxygluconokinase	ecl8_00205
ecl8_00206	212561	213310	c	hypothetical protein	ecl8_00206
kdgR_1	213422	214438	c	HTH-type transcriptional regulator KdgR	ecl8_00207
yiaD	214542	215204	c	putative lipoprotein YiaD	ecl8_00208
bisC	215372	217702		Biotin sulfoxide reductase	ecl8_00209
yjaB_1	217671	218111	c	putative N-acetyltransferase YjaB	ecl8_00210
tag	218089	218670	c	DNA-3-methyladenine glycosylase 1	ecl8_00211
ecl8_00212	218813	219457		hypothetical protein	ecl8_00212
yhjX	219699	220904		putative MFS-type transporter YhjX	ecl8_00213
eptB	221147	222820		Kdo(2)-lipid A phosphoethanolamine 7''-transferase	ecl8_00214
ecl8_00215	223012	224406		hypothetical protein	ecl8_00215
ecl8_00216	224526	224602		tRNA-Pro	ecl8_00216
ecl8_00217	224747	225532	c	hypothetical protein	ecl8_00217
ecl8_00218	225589	226110	c	hypothetical protein	ecl8_00218
dppA_1	226767	228374		Periplasmic dipeptide transport protein	ecl8_00219
dppB_1	228509	229528		Dipeptide transport system permease protein DppB	ecl8_00220
dppC	229538	230440		Dipeptide transport system permease protein DppC	ecl8_00221
dppD_1	230451	231434		Dipeptide transport ATP-binding protein DppD	ecl8_00222
oppF_1	231431	232444		Oligopeptide transport ATP-binding protein OppF	ecl8_00223
ecl8_00224	232959	233498		hypothetical protein	ecl8_00224
bcsQ_1	233489	234292		Cellulose biosynthesis protein BcsQ	ecl8_00225
acsAB	234312	236423		Cellulose synthase 1	ecl8_00226
bcsB_1	236420	238855		Cyclic di-GMP-binding protein	ecl8_00227
acsC	238852	242904		Cellulose synthase operon protein C	ecl8_00228
acsD	242904	243380		Cellulose synthase operon protein D	ecl8_00229
ecl8_00230	243392	244393		Endoglucanase	ecl8_00230
ecl8_00231	244501	246180	c	hypothetical protein	ecl8_00231
ecl8_00232	246177	246374	c	hypothetical protein	ecl8_00232
bcsE	246374	247927	c	Cyclic di-GMP binding protein BcsE	ecl8_00233
yhjR	248096	248284		Protein YhjR	ecl8_00234
bcsQ_2	248296	249027		Cellulose biosynthesis protein BcsQ	ecl8_00235
bcsA	249024	251639		Cellulose synthase catalytic subunit [UDP-forming]	ecl8_00236
bcsB_2	251671	253995		Cyclic di-GMP-binding protein	ecl8_00237
bcsZ	253999	255108		Endoglucanase	ecl8_00238
bcsC	255090	258569		Cellulose synthase operon protein C	ecl8_00239
pdeK	258812	260818		putative cyclic di-GMP phosphodiesterase PdeK	ecl8_00240
dctA_1	260975	262261		Aerobic C4-dicarboxylate transport protein	ecl8_00241
yhjJ	262481	263983		Protein YhjJ	ecl8_00242
kdgK_2	264038	264967	c	2-dehydro-3-deoxygluconokinase	ecl8_00243
ecl8_00244	265162	267213		hypothetical protein	ecl8_00244
yhjE_1	267251	268573	c	Inner membrane metabolite transport protein YhjE	ecl8_00245
yhjD	268845	269876	c	Inner membrane protein YhjD	ecl8_00246
dmlR_2	269983	270882	c	HTH-type transcriptional regulator DmlR	ecl8_00247
fabG_1	271002	271760		3-oxoacyl-[acyl-carrier-protein] reductase FabG	ecl8_00248
speG_1	271795	272328	c	Spermidine N(1)-acetyltransferase	ecl8_00249
treF	272395	274047	c	Cytoplasmic trehalase	ecl8_00250
adh1_1	274287	275480	c	Long-chain-alcohol dehydrogenase 1	ecl8_00251
gstB_1	275562	276185		Glutathione S-transferase GstB	ecl8_00252
gor	276238	277590	c	Glutathione reductase	ecl8_00253
rlmJ	277663	278505	c	Ribosomal RNA large subunit methyltransferase J	ecl8_00254
phoC_1	278699	279970		Major phosphate-irrepressible acid phosphatase	ecl8_00255
prlC	280153	282195		Oligopeptidase A	ecl8_00256
rsmJ	282203	282955		Ribosomal RNA small subunit methyltransferase J	ecl8_00257
dtpB	283101	284573	c	Dipeptide and tripeptide permease B	ecl8_00258
uspA_1	284830	285267	c	Universal stress protein A	ecl8_00259
uspB	285650	285985		Universal stress protein B	ecl8_00260
pitA	286041	287537	c	Low-affinity inorganic phosphate transporter 1	ecl8_00261
ecl8_00262	287812	288960		hypothetical protein	ecl8_00262
ecl8_00263	289000	290013	c	Magnesium transporter MgtE	ecl8_00263
ecl8_00264	290420	290779		hypothetical protein	ecl8_00264
nikR	290807	291208	c	Nickel-responsive regulator	ecl8_00265
nikE	291196	291987	c	Nickel import ATP-binding protein NikE	ecl8_00266
nikD	291984	292748	c	Nickel import ATP-binding protein NikD	ecl8_00267
nikC	292748	293581	c	Nickel transport system permease protein NikC	ecl8_00268
nikB	293578	294522	c	Nickel transport system permease protein NikB	ecl8_00269
nikA	294522	296090	c	Nickel-binding periplasmic protein	ecl8_00270
allS_1	296229	297089	c	HTH-type transcriptional activator AllS	ecl8_00271
padC	297187	297693		Phenolic acid decarboxylase PadC	ecl8_00272
arnB	298090	299229		UDP-4-amino-4-deoxy-L-arabinose--oxoglutarate aminotransferase	ecl8_00273
arnC	299231	300214		Undecaprenyl-phosphate 4-deoxy-4-formamido-L-arabinose transferase	ecl8_00274
arnA	300211	302196		Bifunctional polymyxin resistance protein ArnA	ecl8_00275
arnD	302193	303095		putative 4-deoxy-4-formamido-L-arabinose-phosphoundecaprenol deformylase ArnD	ecl8_00276
arnT	303095	304750		Undecaprenyl phosphate-alpha-4-amino-4-deoxy-L-arabinose arabinosyl transferase	ecl8_00277
arnE	304747	305085		putative 4-amino-4-deoxy-L-arabinose-phosphoundecaprenol flippase subunit ArnE	ecl8_00278
arnF	305085	305465		putative 4-amino-4-deoxy-L-arabinose-phosphoundecaprenol flippase subunit ArnF	ecl8_00279
yhhT_1	305462	306511	c	Putative transport protein YhhT	ecl8_00280
yhhS_1	306645	307865		putative MFS-type transporter YhhS	ecl8_00281
ecl8_00282	307866	308423	c	hypothetical protein	ecl8_00282
yhhQ	308497	309162	c	Queuosine precursor transporter	ecl8_00283
tusA	309369	309614		Sulfur carrier protein TusA	ecl8_00284
zntA	309941	312151	c	Zinc/cadmium/lead-transporting P-type ATPase	ecl8_00285
ecl8_00286	312230	312856	c	hypothetical protein	ecl8_00286
ecl8_00287	313007	313357		hypothetical protein	ecl8_00287
ecl8_00288	313371	313646	c	hypothetical protein	ecl8_00288
rsmD	313636	314232	c	Ribosomal RNA small subunit methyltransferase D	ecl8_00289
ftsY	314415	315938		Signal recognition particle receptor FtsY	ecl8_00290
ftsE	315941	316609		Cell division ATP-binding protein FtsE	ecl8_00291
ftsX	316602	317657		Cell division protein FtsX	ecl8_00292
rpoH	317927	318781		RNA polymerase sigma factor RpoH	ecl8_00293
gabR_1	318834	320357	c	HTH-type transcriptional regulatory protein GabR	ecl8_00294
puuE	320476	321741		4-aminobutyrate aminotransferase PuuE	ecl8_00295
tyrP_1	321889	323133		Tyrosine-specific transport protein	ecl8_00296
livJ_1	323397	324494		Leu/Ile/Val-binding protein	ecl8_00297
panM	325261	325644	c	PanD regulatory factor	ecl8_00298
livK	326068	327177		Leucine-specific-binding protein	ecl8_00299
livH_1	327239	328165		High-affinity branched-chain amino acid transport system permease protein LivH	ecl8_00300
ecl8_00301	328162	329439		hypothetical protein	ecl8_00301
lptB_1	329436	330203		Lipopolysaccharide export system ATP-binding protein LptB	ecl8_00302
livF_1	330205	330918		High-affinity branched-chain amino acid transport ATP-binding protein LivF	ecl8_00303
ugpB_1	331190	332506		sn-glycerol-3-phosphate-binding periplasmic protein UgpB	ecl8_00304
ugpA_1	332613	333500		sn-glycerol-3-phosphate transport system permease protein UgpA	ecl8_00305
lacG_1	333497	334342		Lactose transport system permease protein LacG	ecl8_00306
ugpC_1	334344	335414		sn-glycerol-3-phosphate import ATP-binding protein UgpC	ecl8_00307
ugpQ	335411	336151		Glycerophosphodiester phosphodiesterase, cytoplasmic	ecl8_00308
yhhA	336175	336495	c	putative protein YhhA	ecl8_00309
ggt	336619	338364		Glutathione hydrolase proenzyme	ecl8_00310
aaaT	338454	338942	c	L-amino acid N-acetyltransferase AaaT	ecl8_00311
ecl8_00312	339171	339824	c	hypothetical protein	ecl8_00312
yhhX	340089	341126		putative oxidoreductase YhhX	ecl8_00313
yhhW_1	341248	341943		Quercetin 2,3-dioxygenase	ecl8_00314
gntR_1	342058	343053		HTH-type transcriptional regulator GntR	ecl8_00315
gntK	343234	343764		Thermoresistant gluconokinase	ecl8_00316
gntU	343839	345104		Low-affinity gluconate transporter	ecl8_00317
asd_1	345567	346673		Aspartate-semialdehyde dehydrogenase	ecl8_00318
glgB	346912	349098		1,4-alpha-glucan branching enzyme GlgB	ecl8_00319
glgX	349095	351071		Glycogen debranching enzyme	ecl8_00320
glgC_1	351152	352447		Glucose-1-phosphate adenylyltransferase	ecl8_00321
glgA	352447	353880		Glycogen synthase	ecl8_00322
malP_3	353898	356345		Maltodextrin phosphorylase	ecl8_00323
glpD	356434	357942	c	Aerobic glycerol-3-phosphate dehydrogenase	ecl8_00324
glpE_1	358147	358476		Thiosulfate sulfurtransferase GlpE	ecl8_00325
glpG	358533	359357		Rhomboid protease GlpG	ecl8_00326
glpR_1	359407	360165		Glycerol-3-phosphate regulon repressor	ecl8_00327
malT	360181	362886	c	HTH-type transcriptional regulator MalT	ecl8_00328
malP_4	363511	365901		Maltodextrin phosphorylase	ecl8_00329
malQ	365912	368005		4-alpha-glucanotransferase	ecl8_00330
gntT	368108	369424	c	High-affinity gluconate transporter	ecl8_00331
nfuA	369761	370336	c	Fe/S biogenesis protein NfuA	ecl8_00332
pyrE_2	370395	371069	c	Orotate phosphoribosyltransferase	ecl8_00333
bioH	371108	371881		Pimeloyl-[acyl-carrier protein] methyl ester esterase	ecl8_00334
bhsA_1	372002	372271		Multiple stress resistance protein BhsA	ecl8_00335
feoC	372360	372599	c	putative [Fe-S]-dependent transcriptional repressor	ecl8_00336
feoB_1	372609	374927	c	Fe(2+) transporter FeoB	ecl8_00337
feoA	374956	375183	c	Fe(2+) transport protein A	ecl8_00338
yhgF	375596	377926	c	Protein YhgF	ecl8_00339
greB	378027	378500	c	Transcription elongation factor GreB	ecl8_00340
ompR_1	378728	379447		Transcriptional regulatory protein OmpR	ecl8_00341
envZ_1	379444	380799		Osmolarity sensor protein EnvZ	ecl8_00342
pckA_1	380877	382499	c	Phosphoenolpyruvate carboxykinase (ATP)	ecl8_00343
hslO	382860	383738	c	33 kDa chaperonin	ecl8_00344
hslR	383763	384164	c	Heat shock protein 15	ecl8_00345
yrfG	384161	384844	c	GMP/IMP nucleotidase YrfG	ecl8_00346
igaA	384905	387034	c	Intracellular growth attenuator protein igaA	ecl8_00347
nudE	387355	387915		ADP compounds hydrolase NudE	ecl8_00348
mrcA	387969	390527	c	Penicillin-binding protein 1A	ecl8_00349
ecl8_00350	390646	391446		hypothetical protein	ecl8_00350
ecl8_00351	391430	391963		hypothetical protein	ecl8_00351
ecl8_00352	391953	392381		hypothetical protein	ecl8_00352
pilQ	392687	393931		Type IV pilus biogenesis and competence protein PilQ	ecl8_00353
aroK_1	394202	394723		Shikimate kinase 1	ecl8_00354
aroB	394779	395873		3-dehydroquinate synthase	ecl8_00355
damX	395958	397244		Cell division protein DamX	ecl8_00356
dam_1	397323	398150		DNA adenine methylase	ecl8_00357
rpe	398168	398845		Ribulose-phosphate 3-epimerase	ecl8_00358
gph	398838	399599		Phosphoglycolate phosphatase	ecl8_00359
trpS	399592	400596		Tryptophan--tRNA ligase	ecl8_00360
cysG_1	400669	402042	c	Siroheme synthase	ecl8_00361
nirD	402196	402522	c	Nitrite reductase (NADH) small subunit	ecl8_00362
nasD_1	402519	405062	c	Nitrite reductase [NAD(P)H]	ecl8_00363
ecl8_00364	405124	405225		hypothetical protein	ecl8_00364
codA_1	405301	406623		Cytosine deaminase	ecl8_00365
tsgA	406620	407807	c	Protein TsgA	ecl8_00366
ppiA	408084	408653		Peptidyl-prolyl cis-trans isomerase A	ecl8_00367
yhfG	408760	408927		putative protein YhfG	ecl8_00368
fic	408917	409519		putative adenosine monophosphate-protein transferase fic	ecl8_00369
pabA	409552	410115		Aminodeoxychorismate synthase component 2	ecl8_00370
argD	410206	411426		Acetylornithine/succinyldiaminopimelate aminotransferase	ecl8_00371
yccS_1	411416	413494	c	Inner membrane protein YccS	ecl8_00372
crp	413546	414178	c	cAMP-activated global transcriptional regulator CRP	ecl8_00373
yhfA	414485	414889		Protein YhfA	ecl8_00374
cfxP	414944	415813	c	Phosphoribulokinase, plasmid	ecl8_00375
ecl8_00376	415850	416068	c	hypothetical protein	ecl8_00376
ecl8_00377	416065	417087	c	hypothetical protein	ecl8_00377
yheS_2	417291	419195	c	putative ABC transporter ATP-binding protein YheS	ecl8_00378
ywrO_1	419372	419932		General stress protein 14	ecl8_00379
kefC_1	419919	421724		Glutathione-regulated potassium-efflux system protein KefC	ecl8_00380
ecl8_00381	421736	421936		hypothetical protein	ecl8_00381
slyD	422030	422617		FKBP-type peptidyl-prolyl cis-trans isomerase SlyD	ecl8_00382
slyX	422676	422894	c	Protein SlyX	ecl8_00383
fkpA_1	423117	423947		FKBP-type peptidyl-prolyl cis-trans isomerase FkpA	ecl8_00384
dauR	424116	424838		Transcriptional regulator DauR	ecl8_00385
tusD	424838	425224		Sulfurtransferase TusD	ecl8_00386
tusC	425224	425583		Protein TusC	ecl8_00387
tusB	425591	425878		Protein TusB	ecl8_00388
rpsL	426003	426377		30S ribosomal protein S12	ecl8_00389
rpsG	426474	426944		30S ribosomal protein S7	ecl8_00390
fusA_1	427041	429155		Elongation factor G	ecl8_00391
tufA_1	429225	430409		Elongation factor Tu 1	ecl8_00392
bfd	430590	430784		Bacterioferritin-associated ferredoxin	ecl8_00393
bfr	430858	431334		Bacterioferritin	ecl8_00394
outO_1	431318	431839	c	Type 4 prepilin-like proteins leader peptide-processing enzyme	ecl8_00395
rpsJ	432187	432498		30S ribosomal protein S10	ecl8_00396
rplC	432531	433160		50S ribosomal protein L3	ecl8_00397
rplD	433171	433776		50S ribosomal protein L4	ecl8_00398
rplW	433773	434075		50S ribosomal protein L23	ecl8_00399
rplB	434093	434914		50S ribosomal protein L2	ecl8_00400
rpsS	434931	435209		30S ribosomal protein S19	ecl8_00401
rplV	435224	435556		50S ribosomal protein L22	ecl8_00402
rpsC	435574	436272		30S ribosomal protein S3	ecl8_00403
rplP	436285	436695		50S ribosomal protein L16	ecl8_00404
rpmC	436695	436886		50S ribosomal protein L29	ecl8_00405
rpsQ	436886	437140		30S ribosomal protein S17	ecl8_00406
rplN	437306	437677		50S ribosomal protein L14	ecl8_00407
rplX	437688	438002		50S ribosomal protein L24	ecl8_00408
rplE	438017	438556		50S ribosomal protein L5	ecl8_00409
rpsN	438571	438876		30S ribosomal protein S14	ecl8_00410
rpsH	438910	439302		30S ribosomal protein S8	ecl8_00411
rplF	439315	439848		50S ribosomal protein L6	ecl8_00412
rplR	439858	440211		50S ribosomal protein L18	ecl8_00413
rpsE	440226	440729		30S ribosomal protein S5	ecl8_00414
rpmD	440733	440912		50S ribosomal protein L30	ecl8_00415
rplO	440916	441350		50S ribosomal protein L15	ecl8_00416
secY	441358	442689		Protein translocase subunit SecY	ecl8_00417
rpsM	442986	443342		30S ribosomal protein S13	ecl8_00418
rpsD	443782	444402		30S ribosomal protein S4	ecl8_00419
rpoA	444428	445417		DNA-directed RNA polymerase subunit alpha	ecl8_00420
rplQ	445458	445844		50S ribosomal protein L17	ecl8_00421
ecl8_00422	445953	446321		hypothetical protein	ecl8_00422
zntR	446324	446752		HTH-type transcriptional regulator ZntR	ecl8_00423
ecl8_00424	446804	447850		hypothetical protein	ecl8_00424
arfA	447908	448186		Alternative ribosome-rescue factor A	ecl8_00425
mscL	448122	448535	c	Large-conductance mechanosensitive channel	ecl8_00426
trkA	448676	450052	c	Trk system potassium uptake protein TrkA	ecl8_00427
rsmB	450066	451361	c	Ribosomal RNA small subunit methyltransferase B	ecl8_00428
fmt	451414	452361	c	Methionyl-tRNA formyltransferase	ecl8_00429
def_1	452376	452885	c	Peptide deformylase	ecl8_00430
dprA	453014	454138		DNA processing protein DprA	ecl8_00431
smg	454110	454583		Protein Smg	ecl8_00432
topA_1	454610	455152		DNA topoisomerase 1	ecl8_00433
tsaC	455157	455729		Threonylcarbamoyl-AMP synthase	ecl8_00434
aroE_1	455733	456551		Shikimate dehydrogenase (NADP(+))	ecl8_00435
ecl8_00436	456548	456805		hypothetical protein	ecl8_00436
yrdA_1	456781	457335	c	Protein YrdA	ecl8_00437
ecl8_00438	457809	459344		16S ribosomal RNA	ecl8_00438
ecl8_00439	459546	462444		23S ribosomal RNA	ecl8_00439
ecl8_00440	462548	462658		5S ribosomal RNA	ecl8_00440
ecl8_00441	462676	462751		tRNA-Thr	ecl8_00441
ecl8_00442	462792	462901		5S ribosomal RNA	ecl8_00442
ecl8_00443	463314	463535	c	hypothetical protein	ecl8_00443
acrF	463828	466938	c	Multidrug export protein AcrF	ecl8_00444
acrE	466951	468090	c	Multidrug export protein AcrE	ecl8_00445
acrR_1	468469	469122		HTH-type transcriptional regulator AcrR	ecl8_00446
fis	469207	469503	c	DNA-binding protein Fis	ecl8_00447
dus	469528	470493	c	putative tRNA-dihydrouridine synthase	ecl8_00448
prmA	470851	471732	c	Ribosomal protein L11 methyltransferase	ecl8_00449
panF	471744	473195	c	Sodium/pantothenate symporter	ecl8_00450
yhdT	473185	473427	c	putative membrane protein YhdT	ecl8_00451
accC_1	473538	474887	c	Biotin carboxylase	ecl8_00452
accB_1	474898	475365	c	Biotin carboxyl carrier protein of acetyl-CoA carboxylase	ecl8_00453
aroQ	475388	475840	c	3-dehydroquinate dehydratase	ecl8_00454
msrQ	476064	476672	c	Protein-methionine-sulfoxide reductase heme-binding subunit MsrQ	ecl8_00455
msrP	476672	477673	c	Protein-methionine-sulfoxide reductase catalytic subunit MsrP	ecl8_00456
csrD	478174	480114		RNase E specificity factor CsrD	ecl8_00457
mreB	480420	481463		Rod shape-determining protein MreB	ecl8_00458
mreC	481534	482526		Cell shape-determining protein MreC	ecl8_00459
mreD	482526	483014		Rod shape-determining protein MreD	ecl8_00460
yhdE	483022	483603		Maf-like protein YhdE	ecl8_00461
rng	483606	485075		Ribonuclease G	ecl8_00462
ecl8_00463	485113	488910		hypothetical protein	ecl8_00463
tldD	488999	490444		Metalloprotease TldD	ecl8_00464
dmlR_3	490480	491409	c	HTH-type transcriptional regulator DmlR	ecl8_00465
aaeX	491541	491744		Protein AaeX	ecl8_00466
aaeA_1	491752	492684		p-hydroxybenzoic acid efflux pump subunit AaeA	ecl8_00467
aaeB_1	492690	494657		p-hydroxybenzoic acid efflux pump subunit AaeB	ecl8_00468
yhcO	494737	495012		putative protein YhcO	ecl8_00469
bhsA_2	495063	495329	c	Multiple stress resistance protein BhsA	ecl8_00470
bhsA_3	495428	495691	c	Multiple stress resistance protein BhsA	ecl8_00471
argR	496067	496537	c	Arginine repressor	ecl8_00472
mdh_1	496952	497890		Malate dehydrogenase	ecl8_00473
degS	498027	499085	c	Serine endoprotease DegS	ecl8_00474
degQ	499173	500540	c	Periplasmic pH-dependent serine endoprotease DegQ	ecl8_00475
yhcB	500714	501112	c	Inner membrane protein YhcB	ecl8_00476
zapE_1	501303	502430		Cell division protein ZapE	ecl8_00477
rplM	502696	503124		50S ribosomal protein L13	ecl8_00478
rpsI	503140	503532		30S ribosomal protein S9	ecl8_00479
sspA	503844	504482		Stringent starvation protein A	ecl8_00480
sspB	504486	504980		Stringent starvation protein B	ecl8_00481
nanE	505105	505809		Putative N-acetylmannosamine-6-phosphate 2-epimerase	ecl8_00482
gltD_1	505864	507282	c	Glutamate synthase [NADPH] small chain	ecl8_00483
gltB	507292	511752	c	Glutamate synthase [NADPH] large chain	ecl8_00484
rimO_1	512426	513358		Ribosomal protein S12 methylthiotransferase RimO	ecl8_00485
exuT_1	513410	514693	c	Hexuronate transporter	ecl8_00486
rspB	514779	515795	c	Starvation-sensing protein RspB	ecl8_00487
uxuA_1	516092	517156		Mannonate dehydratase	ecl8_00488
arcB	517303	519642		Aerobic respiration control sensor protein ArcB	ecl8_00489
elbB	519876	520529		Glyoxalase ElbB	ecl8_00490
mtgA	520526	521251		Biosynthetic peptidoglycan transglycosylase	ecl8_00491
ptsO	521315	521587	c	Phosphocarrier protein NPr	ecl8_00492
rapZ	521584	522438	c	RNase adapter protein RapZ	ecl8_00493
ptsN	522484	522972	c	Nitrogen regulatory protein	ecl8_00494
hpf_1	523043	523330	c	Ribosome hibernation promoting factor	ecl8_00495
rpoN	523353	524786	c	RNA polymerase sigma-54 factor	ecl8_00496
lptB_2	524834	525559	c	Lipopolysaccharide export system ATP-binding protein LptB	ecl8_00497
lptA	525566	526111	c	Lipopolysaccharide export system protein LptA	ecl8_00498
lptC	526080	526655	c	Lipopolysaccharide export system protein LptC	ecl8_00499
kdsC	526652	527218	c	3-deoxy-D-manno-octulosonate 8-phosphate phosphatase KdsC	ecl8_00500
kdsD	527233	528219	c	Arabinose 5-phosphate isomerase KdsD	ecl8_00501
yrbG	528234	529211	c	Inner membrane protein YrbG	ecl8_00502
mlaF	529421	530233		putative phospholipid import ATP-binding protein MlaF	ecl8_00503
mlaE	530241	531023		putative phospholipid ABC transporter permease protein MlaE	ecl8_00504
mlaD	531028	531579		putative phospholipid ABC transporter-binding protein MlaD	ecl8_00505
mlaC	531598	532233		putative phospholipid-binding protein MlaC	ecl8_00506
mlaB	532233	532520		putative phospholipid ABC transporter-binding protein MlaB	ecl8_00507
ibaG	532660	532914		Acid stress protein IbaG	ecl8_00508
murA	532968	534227		UDP-N-acetylglucosamine 1-carboxyvinyltransferase	ecl8_00509
ecl8_00510	534283	534555	c	hypothetical protein	ecl8_00510
ispB	534754	535725	c	Octaprenyl diphosphate synthase	ecl8_00511
rplU	535986	536297		50S ribosomal protein L21	ecl8_00512
rpmA	536318	536575		50S ribosomal protein L27	ecl8_00513
yhbE	536669	537634		putative inner membrane transporter YhbE	ecl8_00514
obgE	537650	538828		GTPase ObgE/CgtA	ecl8_00515
dacB	538880	540313	c	D-alanyl-D-alanine carboxypeptidase DacB	ecl8_00516
greA	540549	541025		Transcription elongation factor GreA	ecl8_00517
yhbY	541178	541510	c	RNA-binding protein YhbY	ecl8_00518
rlmE	541595	542224		Ribosomal RNA large subunit methyltransferase E	ecl8_00519
ftsH_1	542315	544258		ATP-dependent zinc metalloprotease FtsH	ecl8_00520
folP	544352	545200		Dihydropteroate synthase	ecl8_00521
glmM	545193	546530		Phosphoglucosamine mutase	ecl8_00522
secG	546760	547098		Protein-export membrane protein SecG	ecl8_00523
ecl8_00524	547108	547194		tRNA-Leu	ecl8_00524
ecl8_00525	547339	547740		hypothetical protein	ecl8_00525
ecl8_00526	547782	548333	c	hypothetical protein	ecl8_00526
ecl8_00527	548675	549304	c	hypothetical protein	ecl8_00527
argG	549474	550817	c	Argininosuccinate synthase	ecl8_00528
ecl8_00529	551125	551201		tRNA-Met	ecl8_00529
rimP	551440	551862		Ribosome maturation factor RimP	ecl8_00530
nusA	551890	553377		Transcription termination/antitermination protein NusA	ecl8_00531
infB	553402	556092		Translation initiation factor IF-2	ecl8_00532
rbfA	556195	556596		30S ribosome-binding factor	ecl8_00533
truB	556596	557540		tRNA pseudouridine synthase B	ecl8_00534
rpsO	557689	557958		30S ribosomal protein S15	ecl8_00535
pnp	558201	560336		Polyribonucleotide nucleotidyltransferase	ecl8_00536
nlpI	560445	561329		Lipoprotein NlpI	ecl8_00537
deaD	561507	563438		ATP-dependent RNA helicase DeaD	ecl8_00538
mtr	563583	564827		Tryptophan-specific transport protein	ecl8_00539
limB_1	564872	565879	c	Limonene 1,2-monooxygenase	ecl8_00540
ecl8_00541	566023	566901	c	hypothetical protein	ecl8_00541
yhbU	566907	567902	c	putative protease YhbU	ecl8_00542
ecl8_00543	568124	568648		hypothetical protein	ecl8_00543
ecl8_00544	568642	569145		hypothetical protein	ecl8_00544
ecl8_00545	569132	569452	c	hypothetical protein	ecl8_00545
ecl8_00546	569472	569915		hypothetical protein	ecl8_00546
yhbO	569877	570413	c	Protein/nucleic acid deglycase 2	ecl8_00547
ecl8_00548	570542	571189		hypothetical protein	ecl8_00548
ecl8_00549	571265	572305		Putative two-component membrane permease complex subunit SMU_747c	ecl8_00549
osmY_1	572427	573002	c	Osmotically-inducible protein Y	ecl8_00550
diaA	573012	573602	c	DnaA initiator-associating protein DiaA	ecl8_00551
ecl8_00552	573628	574014	c	hypothetical protein	ecl8_00552
lpoA	573972	576080	c	Penicillin-binding protein activator LpoA	ecl8_00553
rsmI	576144	577007		Ribosomal RNA small subunit methyltransferase I	ecl8_00554
garD	577208	578779	c	Galactarate dehydratase (L-threo-forming)	ecl8_00555
ecl8_00556	578962	579111		hypothetical protein	ecl8_00556
garP	579172	580503		putative galactarate transporter	ecl8_00557
garL	580530	581300		5-keto-4-deoxy-D-glucarate aldolase	ecl8_00558
garR	581327	582217		2-hydroxy-3-oxopropionate reductase	ecl8_00559
garK_1	582282	583427		Glycerate 2-kinase	ecl8_00560
ecl8_00561	584071	584535	c	hypothetical protein	ecl8_00561
ecl8_00562	584843	585253		hypothetical protein	ecl8_00562
ecl8_00563	585327	585494	c	hypothetical protein	ecl8_00563
yhaK	585519	586220	c	Pirin-like protein YhaK	ecl8_00564
yhaJ_1	586325	587221		HTH-type transcriptional regulator YhaJ	ecl8_00565
yhaH	587263	587631	c	Inner membrane protein YhaH	ecl8_00566
yqjG	587758	588744	c	Glutathionyl-hydroquinone reductase YqjG	ecl8_00567
yqjF	588825	589217	c	Inner membrane protein YqjF	ecl8_00568
ecl8_00569	589563	589859	c	hypothetical protein	ecl8_00569
yqjE	589856	590254	c	Inner membrane protein YqjE	ecl8_00570
yqjD	590257	590562	c	putative protein YqjD	ecl8_00571
yqjC	590608	590976	c	Protein YqjC	ecl8_00572
mzrA	591126	591512	c	Modulator protein MzrA	ecl8_00573
yqjA	591512	592174	c	Inner membrane protein YqjA	ecl8_00574
lldR_2	592516	593292	c	Putative L-lactate dehydrogenase operon regulatory protein	ecl8_00575
exuT_2	593420	594721	c	Hexuronate transporter	ecl8_00576
uxaC	595202	596614		Uronate isomerase	ecl8_00577
uxaA	596633	598120		Altronate dehydratase	ecl8_00578
ygjV	598250	598804		Inner membrane protein YgjV	ecl8_00579
sstT	598820	600067	c	Serine/threonine transporter SstT	ecl8_00580
alx	600334	601305	c	Putative membrane-bound redox modulator Alx	ecl8_00581
iolU_1	601577	602566	c	scyllo-inositol 2-dehydrogenase (NADP(+)) IolU	ecl8_00582
ygjP	602640	603140	c	UTP pyrophosphatase	ecl8_00583
sutR_1	603160	603762	c	HTH-type transcriptional regulator SutR	ecl8_00584
ecl8_00585	603806	604513		hypothetical protein	ecl8_00585
rlmG	604599	605729		Ribosomal RNA large subunit methyltransferase G	ecl8_00586
fadH	605838	607859	c	2,4-dienoyl-CoA reductase	ecl8_00587
lsrK	608043	609641	c	Autoinducer-2 kinase	ecl8_00588
lsrR_1	609679	610650	c	Transcriptional regulator LsrR	ecl8_00589
lsrA	610869	612356		Autoinducer 2 import ATP-binding protein LsrA	ecl8_00590
lsrC	612353	613387		Autoinducer 2 import system permease protein LsrC	ecl8_00591
lsrD_1	613388	614386		Autoinducer 2 import system permease protein LsrD	ecl8_00592
lsrB_1	614388	615389		Autoinducer 2-binding protein LsrB	ecl8_00593
lsrF	615401	616288		3-hydroxy-5-phosphonooxypentane-2,4-dione thiolase	ecl8_00594
lsrG	616285	616581		(4S)-4-hydroxy-5-phosphonooxypentane-2,3-dione isomerase	ecl8_00595
ygjK	616628	618979	c	Glucosidase YgjK	ecl8_00596
ecl8_00597	618997	620055	c	hypothetical protein	ecl8_00597
ygjI_1	620069	621502	c	Inner membrane transporter YgjI	ecl8_00598
ygjI_2	621732	623165	c	Inner membrane transporter YgjI	ecl8_00599
ebgC	623260	623709	c	Evolved beta-galactosidase subunit beta	ecl8_00600
ebgA	623706	626798	c	Evolved beta-galactosidase subunit alpha	ecl8_00601
lacR	627007	627990	c	HTH-type transcriptional regulator LacR	ecl8_00602
ygjH	628198	628530		tRNA-binding protein YgjH	ecl8_00603
patA	628573	629952	c	Putrescine aminotransferase	ecl8_00604
yqjI	630210	630764	c	Transcriptional regulator YqjI	ecl8_00605
yqjH	631002	631778		NADPH-dependent ferric-chelate reductase	ecl8_00606
dhaK_1	631934	633583	c	Dihydroxyacetone kinase	ecl8_00607
dhaM	633659	635080	c	Protein-lysine deacetylase	ecl8_00608
dhaL	635091	635723	c	PEP-dependent dihydroxyacetone kinase, ADP-binding subunit DhaL	ecl8_00609
dhaK_2	635734	636804	c	PEP-dependent dihydroxyacetone kinase, dihydroxyacetone-binding subunit DhaK	ecl8_00610
dhaD	637415	638512		Glycerol dehydrogenase	ecl8_00611
dhaR	638614	640539		PTS-dependent dihydroxyacetone kinase operon regulatory protein	ecl8_00612
yvqK_1	640517	641047	c	Cob(I)yrinic acid a,c-diamide adenosyltransferase	ecl8_00613
ecl8_00614	641048	641401	c	hypothetical protein	ecl8_00614
dhaT	641422	642585	c	1,3-propanediol dehydrogenase	ecl8_00615
ecl8_00616	642607	643035	c	hypothetical protein	ecl8_00616
dhaB	643449	645116		Glycerol dehydratase large subunit	ecl8_00617
pduD_1	645129	645713		Propanediol dehydratase medium subunit	ecl8_00618
pduE_1	645716	646141		Propanediol dehydratase small subunit	ecl8_00619
ddrA_1	646154	647977		Diol dehydratase-reactivating factor alpha subunit	ecl8_00620
glpF_2	648031	648834		Glycerol uptake facilitator protein	ecl8_00621
hdeB_1	648886	649191	c	Acid stress chaperone HdeB	ecl8_00622
hdeD_1	649218	649793	c	Protein HdeD	ecl8_00623
yfdX	650064	650705		Protein YfdX	ecl8_00624
evgS_1	650796	654038	c	Sensor protein EvgS	ecl8_00625
evgA_1	654043	654657	c	DNA-binding transcriptional activator EvgA	ecl8_00626
hdeB_2	655034	655324		Acid stress chaperone HdeB	ecl8_00627
ecl8_00628	655393	655590	c	hypothetical protein	ecl8_00628
ecl8_00629	656207	656282	c	tRNA-Met	ecl8_00629
mug	656407	656913		G/U mismatch-specific DNA glycosylase	ecl8_00630
rpoD	657012	658853	c	RNA polymerase sigma factor RpoD	ecl8_00631
dnaG	659072	660817	c	DNA primase	ecl8_00632
rpsU	660929	661144	c	30S ribosomal protein S21	ecl8_00633
tsaD	661382	662395		tRNA N6-adenosine threonylcarbamoyltransferase	ecl8_00634
ecl8_00635	662440	664047	c	hypothetical protein	ecl8_00635
ureG_1	664201	664818	c	Urease accessory protein UreG	ecl8_00636
ureF_1	664827	665537	c	Urease accessory protein UreF	ecl8_00637
ureE_1	665503	665979	c	Urease accessory protein UreE	ecl8_00638
ureC_1	665989	667692	c	Urease subunit alpha	ecl8_00639
ureB_1	667685	668005	c	Urease subunit beta	ecl8_00640
ureA	668015	668317	c	Urease subunit gamma	ecl8_00641
ureD	668327	669151	c	Urease accessory protein UreD	ecl8_00642
plsY	669549	670166	c	putative glycerol-3-phosphate acyltransferase	ecl8_00643
folB	670274	670657		Dihydroneopterin aldolase	ecl8_00644
uppP	670856	671677		Undecaprenyl-diphosphatase	ecl8_00645
cca	671689	672930	c	Multifunctional CCA protein	ecl8_00646
ecl8_00647	672992	673612	c	hypothetical protein	ecl8_00647
ygiF	673827	675125		Inorganic triphosphatase	ecl8_00648
glnE	675146	677983		Bifunctional glutamine synthetase adenylyltransferase/adenylyl-removing enzyme	ecl8_00649
hldE	678042	679475		Bifunctional protein HldE	ecl8_00650
glgS	679694	679891		Surface composition regulator	ecl8_00651
yqiC	679927	680199	c	putative protein YqiC	ecl8_00652
ribB	680577	681230		3,4-dihydroxy-2-butanone 4-phosphate synthase	ecl8_00653
zupT	681292	682062	c	Zinc transporter ZupT	ecl8_00654
ygiD	682249	683040		4,5-DOPA dioxygenase extradiol	ecl8_00655
ygiC	683085	684245	c	Putative acid--amine ligase YgiC	ecl8_00656
ecl8_00657	684251	684922	c	hypothetical protein	ecl8_00657
tolC	685090	686562	c	Outer membrane protein TolC	ecl8_00658
nudF	686759	687391		ADP-ribose pyrophosphatase	ecl8_00659
ecl8_00660	687388	687810		hypothetical protein	ecl8_00660
cpdA_1	687835	688662		3',5'-cyclic adenosine monophosphate phosphodiesterase CpdA	ecl8_00661
ecl8_00662	688662	689237		hypothetical protein	ecl8_00662
parE	689268	691163		DNA topoisomerase 4 subunit B	ecl8_00663
ygiN	691236	691550	c	putative quinol monooxygenase YgiN	ecl8_00664
mdaB	691631	692212	c	Modulator of drug activity B	ecl8_00665
qseC	692319	693662	c	Sensor protein QseC	ecl8_00666
qseB	693659	694318	c	Transcriptional regulatory protein QseB	ecl8_00667
ygiW_1	694469	694864		Protein YgiW	ecl8_00668
adaA_1	694942	695811		Bifunctional transcriptional activator/DNA repair enzyme AdaA	ecl8_00669
parC	695933	698191		DNA topoisomerase 4 subunit A	ecl8_00670
plsC	698383	699120		1-acyl-sn-glycerol-3-phosphate acyltransferase	ecl8_00671
ftsP	699204	700616		Cell division protein FtsP	ecl8_00672
rimO_2	700740	702923		Ribosomal protein S12 methylthiotransferase RimO	ecl8_00673
ecl8_00674	702981	703286		hypothetical protein	ecl8_00674
ecl8_00675	703432	703542	c	hypothetical protein	ecl8_00675
dkgA	703542	704369	c	2,5-diketo-D-gluconic acid reductase A	ecl8_00676
yqhD	704515	705678	c	Alcohol dehydrogenase YqhD	ecl8_00677
rclR_2	705875	706774		RCS-specific HTH-type transcriptional activator RclR	ecl8_00678
yghB	706824	707483	c	Inner membrane protein YghB	ecl8_00679
metC_1	707615	708802	c	Cystathionine beta-lyase MetC	ecl8_00680
exbB	709053	709784		Biopolymer transport protein ExbB	ecl8_00681
exbD	709791	710216		Biopolymer transport protein ExbD	ecl8_00682
ecl8_00683	710355	710849		hypothetical protein	ecl8_00683
ecl8_00684	710971	711333		hypothetical protein	ecl8_00684
clcD_1	711477	711857		Carboxymethylenebutenolidase	ecl8_00685
ecl8_00686	711936	712223		hypothetical protein	ecl8_00686
yghU	712296	713162	c	Disulfide-bond oxidoreductase YghU	ecl8_00687
ecl8_00688	713210	713770	c	hypothetical protein	ecl8_00688
gss	713990	715855		Bifunctional glutathionylspermidine synthetase/amidase	ecl8_00689
lysN_1	716001	717182		2-aminoadipate transaminase	ecl8_00690
ecl8_00691	717249	717338	c	hypothetical protein	ecl8_00691
ecl8_00692	717359	717547	c	hypothetical protein	ecl8_00692
ecl8_00693	717747	718091	c	hypothetical protein	ecl8_00693
fabG_2	718178	718780	c	3-oxoacyl-[acyl-carrier-protein] reductase FabG	ecl8_00694
dmlR_4	718878	719789		HTH-type transcriptional regulator DmlR	ecl8_00695
metC_2	719790	720938	c	Cystathionine beta-lyase	ecl8_00696
cbs	720949	722325	c	Putative cystathionine beta-synthase	ecl8_00697
ecl8_00698	724035	724550		hypothetical protein	ecl8_00698
elfD_1	724652	725332		putative fimbrial chaperone protein ElfD	ecl8_00699
ecl8_00700	725316	725864		hypothetical protein	ecl8_00700
ecl8_00701	725883	726461		hypothetical protein	ecl8_00701
elfD_2	726475	727248		putative fimbrial chaperone protein ElfD	ecl8_00702
fimC_1	727257	728021		Chaperone protein FimC	ecl8_00703
yraJ	728068	730662		Outer membrane usher protein YraJ	ecl8_00704
ecl8_00705	730659	732740		hypothetical protein	ecl8_00705
intA_1	733498	734361	c	Prophage integrase IntA	ecl8_00706
ecl8_00707	735161	735236	c	tRNA-Phe	ecl8_00707
ydfK_1	735342	736055	c	putative membrane protein YdfK	ecl8_00708
speC	736475	738613		Constitutive ornithine decarboxylase	ecl8_00709
nupG_1	738656	739258	c	Nucleoside permease NupG	ecl8_00710
nupG_2	739255	739908	c	Nucleoside permease NupG	ecl8_00711
mltC	740100	741185	c	Membrane-bound lytic murein transglycosylase C	ecl8_00712
yggX	741232	741507	c	putative Fe(2+)-trafficking protein	ecl8_00713
mutY	741536	742594	c	Adenine DNA glycosylase	ecl8_00714
trmB	742731	743450		tRNA (guanine-N(7)-)-methyltransferase	ecl8_00715
ecl8_00716	743450	743776		hypothetical protein	ecl8_00716
ecl8_00717	743830	744546		hypothetical protein	ecl8_00717
xylH_2	744593	745840	c	Xylose transport system permease protein XylH	ecl8_00718
frcA_1	745845	746654	c	Fructose import ATP-binding protein FrcA	ecl8_00719
xylF_2	746714	747760	c	D-xylose-binding periplasmic protein	ecl8_00720
hemN_1	748053	749192	c	Oxygen-independent coproporphyrinogen-III oxidase-like protein	ecl8_00721
rdgB	749185	749778	c	dITP/XTP pyrophosphatase	ecl8_00722
ecl8_00723	749791	750081	c	hypothetical protein	ecl8_00723
ecl8_00724	750078	750644	c	hypothetical protein	ecl8_00724
yggS	750665	751366	c	Pyridoxal phosphate homeostasis protein	ecl8_00725
yggR	751383	752363		putative protein YggR	ecl8_00726
csgD_1	752712	753365		CsgBAC operon transcriptional regulatory protein	ecl8_00727
yqgF	753418	753834	c	Putative pre-16S rRNA nuclease	ecl8_00728
ecl8_00729	753834	754397	c	hypothetical protein	ecl8_00729
gshB	754572	755522	c	Glutathione synthetase	ecl8_00730
rsmE	755543	756274	c	Ribosomal RNA small subunit methyltransferase E	ecl8_00731
endA	756366	757073	c	Endonuclease-1	ecl8_00732
sprT	757168	757626	c	Protein SprT	ecl8_00733
galP	757746	759140	c	Galactose-proton symporter	ecl8_00734
metK	759524	760678	c	S-adenosylmethionine synthase	ecl8_00735
speA	761520	763496		Biosynthetic arginine decarboxylase	ecl8_00736
speB	763730	764650		Agmatinase	ecl8_00737
loiP	765111	765869	c	Metalloprotease LoiP	ecl8_00738
tktA_1	766148	768139		Transketolase 1	ecl8_00739
epd	768524	769552		D-erythrose-4-phosphate dehydrogenase	ecl8_00740
pgk	769592	770755		Phosphoglycerate kinase	ecl8_00741
fbaA_1	770853	771932		Fructose-bisphosphate aldolase class 2	ecl8_00742
mscS	772123	772980		Small-conductance mechanosensitive channel	ecl8_00743
argO	773132	773767		Arginine exporter protein ArgO	ecl8_00744
ecl8_00745	773857	774624		26 kDa periplasmic immunogenic protein	ecl8_00745
argP	774678	775571	c	HTH-type transcriptional regulator ArgP	ecl8_00746
rpiA	775739	776398		Ribose-5-phosphate isomerase A	ecl8_00747
serA	776668	777900		D-3-phosphoglycerate dehydrogenase	ecl8_00748
ygfA	777984	778580	c	5-formyltetrahydrofolate cyclo-ligase	ecl8_00749
zapA	778904	779233	c	Cell division protein ZapA	ecl8_00750
ecl8_00751	779394	779978		hypothetical protein	ecl8_00751
pepP	780002	781318		Xaa-Pro aminopeptidase	ecl8_00752
ubiH	781315	782493		2-octaprenyl-6-methoxyphenol hydroxylase	ecl8_00753
ubiI	782504	783706		2-octaprenylphenol hydroxylase	ecl8_00754
gcvT	784128	785222		Aminomethyltransferase	ecl8_00755
gcvH	785247	785636		Glycine cleavage system H protein	ecl8_00756
gcvP	785843	788716		Glycine dehydrogenase (decarboxylating)	ecl8_00757
ygfF	788779	789522		putative oxidoreductase YgfF	ecl8_00758
msrAB	789643	790146	c	Peptide methionine sulfoxide reductase MsrA/MsrB	ecl8_00759
bdbD	790136	790747	c	Disulfide bond formation protein D	ecl8_00760
dsbD_1	790749	792758	c	Thiol:disulfide interchange protein DsbD	ecl8_00761
ecl8_00762	792808	793167	c	hypothetical protein	ecl8_00762
bglA_1	793292	794725	c	6-phospho-beta-glucosidase BglA	ecl8_00763
glvR_2	794844	795572	c	HTH-type transcriptional regulator GlvR	ecl8_00764
ecl8_00765	795622	795933		hypothetical protein	ecl8_00765
ecl8_00766	796097	796813		hypothetical protein	ecl8_00766
ygfZ	796854	797837	c	tRNA-modifying protein YgfZ	ecl8_00767
sdhE	798083	798349		FAD assembly factor SdhE	ecl8_00768
ygfX	798330	798740		Inner membrane protein YgfX	ecl8_00769
fldB	798747	799268	c	Flavodoxin 2	ecl8_00770
xerD_1	799369	800265		Tyrosine recombinase XerD	ecl8_00771
dsbC	800288	801001		Thiol:disulfide interchange protein DsbC	ecl8_00772
recJ	801007	802740		Single-stranded-DNA-specific exonuclease RecJ	ecl8_00773
prfB	802962	803924		Peptide chain release factor RF2	ecl8_00774
lysS	803934	805451		Lysine--tRNA ligase	ecl8_00775
idi	805686	806240	c	Isopentenyl-diphosphate Delta-isomerase	ecl8_00776
nlpD_1	806557	807270		Murein hydrolase activator NlpD	ecl8_00777
ecl8_00778	807351	807424		tRNA-Gly	ecl8_00778
ribZ_1	807591	808979	c	Riboflavin transporter RibZ	ecl8_00779
nodD2_1	809109	810038		Nodulation protein D 2	ecl8_00780
ecl8_00781	810653	811375	c	hypothetical protein	ecl8_00781
evgA_2	813151	813825		DNA-binding transcriptional activator EvgA	ecl8_00782
ecl8_00783	814418	815287	c	hypothetical protein	ecl8_00783
evgS_2	815564	819208	c	Sensor protein EvgS	ecl8_00784
evgA_3	819225	819848	c	DNA-binding transcriptional activator EvgA	ecl8_00785
lpfC'	820813	821259		putative outer membrane usher protein LpfC'	ecl8_00786
esiB	821459	822781		Secretory immunoglobulin A-binding protein EsiB	ecl8_00787
hdeA	823194	823514		Acid stress chaperone HdeA	ecl8_00788
ecl8_00789	823554	823682	c	hypothetical protein	ecl8_00789
yejF_1	823712	824305	c	putative ABC transporter ATP-binding protein YejF	ecl8_00790
oppD_1	824305	825111	c	Oligopeptide transport ATP-binding protein OppD	ecl8_00791
ddpC_1	825105	825920	c	putative D,D-dipeptide transport system permease protein DdpC	ecl8_00792
gsiC_1	825917	826942	c	Glutathione transport system permease protein GsiC	ecl8_00793
appA_1	826927	828516	c	Oligopeptide-binding protein AppA	ecl8_00794
ecl8_00795	828621	829619	c	Urea transporter	ecl8_00795
ureH	829719	830669	c	Urease accessory protein UreH	ecl8_00796
ureG_2	830678	831301	c	Urease accessory protein UreG	ecl8_00797
ureF_2	831318	832028	c	Urease accessory protein UreF	ecl8_00798
ureE_2	832012	832650	c	Urease accessory protein UreE	ecl8_00799
ureC_2	832689	834407	c	Urease subunit alpha	ecl8_00800
ureB_2	834439	834879	c	Urease subunit beta	ecl8_00801
ureA2	834913	835215	c	Urease subunit gamma 2	ecl8_00802
amt	835294	836544	c	Ammonia channel	ecl8_00803
hdeB_3	837122	837433	c	Acid stress chaperone HdeB	ecl8_00804
hdeD_2	837482	838072	c	Protein HdeD	ecl8_00805
emrY	838432	839967	c	putative multidrug resistance protein EmrY	ecl8_00806
emrK_1	839971	841137	c	putative multidrug resistance protein EmrK	ecl8_00807
evgA_4	841639	842271		DNA-binding transcriptional activator EvgA	ecl8_00808
evgS_3	842652	844154		Sensor protein EvgS	ecl8_00809
crcB_1	844227	844640	c	Putative fluoride ion transporter CrcB	ecl8_00810
crcB_2	844653	845036	c	Putative fluoride ion transporter CrcB	ecl8_00811
ecl8_00812	845088	845201	c	hypothetical protein	ecl8_00812
ecl8_00813	846241	846486	c	hypothetical protein	ecl8_00813
pdeG_1	846633	848180	c	putative cyclic di-GMP phosphodiesterase PdeG	ecl8_00814
ecl8_00815	848309	848935	c	hypothetical protein	ecl8_00815
ecl8_00816	849191	849994	c	hypothetical protein	ecl8_00816
iolS_1	850028	851047	c	Aldo-keto reductase IolS	ecl8_00817
kefF_1	851068	851625	c	Glutathione-regulated potassium-efflux system ancillary protein KefF	ecl8_00818
ecl8_00819	851634	851942	c	hypothetical protein	ecl8_00819
pgrR_1	852081	852980		HTH-type transcriptional regulator PgrR	ecl8_00820
ecl8_00821	853153	853428		hypothetical protein	ecl8_00821
ecl8_00822	853432	854004	c	hypothetical protein	ecl8_00822
arsR2	854548	854877		Arsenic resistance transcriptional regulator ArsR2	ecl8_00823
arsB	854929	856221		Arsenical pump membrane protein	ecl8_00824
arsC	856231	856653		Arsenate reductase	ecl8_00825
dtpT	857126	858679		Di-/tripeptide transporter	ecl8_00826
ecl8_00827	858864	859163		hypothetical protein	ecl8_00827
cusC_1	859428	860876	c	Cation efflux system protein CusC	ecl8_00828
mdtO	860873	862810	c	Multidrug resistance protein MdtO	ecl8_00829
mdtN_1	862823	863848	c	Multidrug resistance protein MdtN	ecl8_00830
ecl8_00831	863855	864127	c	hypothetical protein	ecl8_00831
ecl8_00832	864333	864563		hypothetical protein	ecl8_00832
yjdJ	864575	864847		putative protein YjdJ	ecl8_00833
ecl8_00834	864890	866302	c	putative signaling protein	ecl8_00834
fimH	866299	867207	c	Type 1 fimbrin D-mannose specific adhesin	ecl8_00835
fimG	867222	867722	c	Protein FimG	ecl8_00836
fimF_1	867735	868262	c	Protein FimF	ecl8_00837
fimD_1	868273	870885	c	Outer membrane usher protein FimD	ecl8_00838
fimC_2	870967	871671	c	Chaperone protein FimC	ecl8_00839
lpfA	871721	872257	c	putative major fimbrial subunit LpfA	ecl8_00840
fim_1	872328	872876	c	Fimbrial subunit type 1	ecl8_00841
xerD_2	873356	873964	c	Tyrosine recombinase XerD	ecl8_00842
xerC_1	874430	875035	c	Tyrosine recombinase XerC	ecl8_00843
ecl8_00844	876253	877209		hypothetical protein	ecl8_00844
marR_1	877206	877712	c	Multiple antibiotic resistance protein MarR	ecl8_00845
ecl8_00846	877794	878690		hypothetical protein	ecl8_00846
ecl8_00847	878786	878995	c	hypothetical protein	ecl8_00847
ecl8_00848	879701	880309		hypothetical protein	ecl8_00848
yadV_1	880405	881106		putative fimbrial chaperone YadV	ecl8_00849
htrE_1	881118	883604		Outer membrane usher protein HtrE	ecl8_00850
mrkD_1	883595	884578		Fimbria adhesin protein	ecl8_00851
ecl8_00852	884592	885227		hypothetical protein	ecl8_00852
pdeH_1	885262	885978	c	Cyclic di-GMP phosphodiesterase PdeH	ecl8_00853
uhpA_2	886122	886694	c	Transcriptional regulatory protein UhpA	ecl8_00854
ycgR	886712	887416	c	Flagellar brake protein YcgR	ecl8_00855
pdxI	887799	888677	c	Pyridoxine 4-dehydrogenase	ecl8_00856
yqeG	888796	890025	c	Inner membrane transport protein YqeG	ecl8_00857
ecl8_00858	890149	890610	c	hypothetical protein	ecl8_00858
gltC_1	890713	891582		HTH-type transcriptional regulator GltC	ecl8_00859
thlA_1	891701	892879		Acetyl-CoA acetyltransferase	ecl8_00860
kdgM	893126	893821		Oligogalacturonate-specific porin KdgM	ecl8_00861
ogl	893957	895132	c	Oligogalacturonate lyase	ecl8_00862
kduD_1	895618	896379		2-dehydro-3-deoxy-D-gluconate 5-dehydrogenase	ecl8_00863
araE	896675	898096		Arabinose-proton symporter	ecl8_00864
cytR_1	898093	899088	c	HTH-type transcriptional repressor CytR	ecl8_00865
cscB	899330	900571		Sucrose permease	ecl8_00866
sacA	900588	902024		Sucrose-6-phosphate hydrolase	ecl8_00867
ecl8_00868	902146	903489		hypothetical protein	ecl8_00868
yesO	903549	904835	c	Putative ABC transporter substrate-binding protein YesO	ecl8_00869
sugC	904852	905979	c	Trehalose import ATP-binding protein SugC	ecl8_00870
araQ	905992	906894	c	L-arabinose transport system permease protein AraQ	ecl8_00871
lacF	906887	907777	c	Lactose transport system permease protein LacF	ecl8_00872
ecl8_00873	908230	908556	c	hypothetical protein	ecl8_00873
ygeA	908696	909409		Putative racemase YgeA	ecl8_00874
occR_1	909375	910301	c	Octopine catabolism/uptake operon regulatory protein OccR	ecl8_00875
lysA	910439	911701		Diaminopimelate decarboxylase	ecl8_00876
ascG_2	911694	912704	c	HTH-type transcriptional regulator AscG	ecl8_00877
licC_2	912995	914332		Lichenan permease IIC component	ecl8_00878
gmuD_1	914340	915767		6-phospho-beta-glucosidase GmuD	ecl8_00879
lldR_3	915835	916608		Putative L-lactate dehydrogenase operon regulatory protein	ecl8_00880
ecl8_00881	916605	917084		hypothetical protein	ecl8_00881
galR_1	917045	918061	c	HTH-type transcriptional regulator GalR	ecl8_00882
aas	918683	920842		Bifunctional protein Aas	ecl8_00883
lplT	920835	922028		Lysophospholipid transporter LplT	ecl8_00884
tas_1	922131	923171	c	Protein tas	ecl8_00885
ygdR_1	923392	923610	c	putative lipoprotein YgdR	ecl8_00886
ecl8_00887	923734	924447	c	hypothetical protein	ecl8_00887
mutH	924511	925206	c	DNA mismatch repair protein MutH	ecl8_00888
rppH	925889	926419		RNA pyrophosphohydrolase	ecl8_00889
ptsP	926432	928678		Phosphoenolpyruvate-dependent phosphotransferase system	ecl8_00890
lgt	928924	929799		Prolipoprotein diacylglyceryl transferase	ecl8_00891
thyA	929806	930600		Thymidylate synthase	ecl8_00892
ecl8_00893	930786	931337		hypothetical protein	ecl8_00893
ecl8_00894	931334	931891		hypothetical protein	ecl8_00894
ecl8_00895	931888	932295		hypothetical protein	ecl8_00895
ecl8_00896	932280	932603		hypothetical protein	ecl8_00896
recC	932616	935993		RecBCD enzyme subunit RecC	ecl8_00897
ptrA_1	936114	938999		Protease 3	ecl8_00898
recB	938996	942532		RecBCD enzyme subunit RecB	ecl8_00899
recD_1	942529	943527		RecBCD enzyme subunit RecD	ecl8_00900
recD_2	943548	944372		RecBCD enzyme subunit RecD	ecl8_00901
ecl8_00902	944430	944750	c	hypothetical protein	ecl8_00902
argA	944980	946311	c	Amino-acid acetyltransferase	ecl8_00903
amiC_1	946539	947792		N-acetylmuramoyl-L-alanine amidase AmiC	ecl8_00904
cobD_1	947810	948886		Threonine-phosphate decarboxylase	ecl8_00905
pduX	948890	949756	c	L-threonine kinase	ecl8_00906
pduW	949848	951062	c	putative propionate kinase	ecl8_00907
pduV_1	951059	951499	c	Propanediol utilization protein PduV	ecl8_00908
pduU	951504	951854	c	Propanediol utilization protein PduU	ecl8_00909
ccmK	951854	952408	c	Carbon dioxide-concentrating mechanism protein CcmK	ecl8_00910
rnfC	952411	953763	c	Electron transport complex subunit RnfC	ecl8_00911
adhE_1	953760	954872	c	Aldehyde-alcohol dehydrogenase	ecl8_00912
adhE_2	954884	956272	c	Aldehyde-alcohol dehydrogenase	ecl8_00913
yvqK_2	956269	957285	c	Cob(I)yrinic acid a,c-diamide adenosyltransferase	ecl8_00914
ccmL	957296	957571	c	Carbon dioxide concentrating mechanism protein CcmL	ecl8_00915
ecl8_00916	957575	958066	c	hypothetical protein	ecl8_00916
pduL	958063	958695	c	Phosphate propanoyltransferase	ecl8_00917
ccmK2	958695	959141	c	Carbon dioxide-concentrating mechanism protein CcmK	ecl8_00918
pduA_1	959163	959438	c	Propanediol utilization protein PduA	ecl8_00919
ecl8_00920	959457	959807	c	hypothetical protein	ecl8_00920
ddrA_2	959797	961629	c	Diol dehydratase-reactivating factor alpha subunit	ecl8_00921
pduE_2	961642	962166	c	Propanediol dehydratase small subunit	ecl8_00922
pduD_2	962181	962870	c	Propanediol dehydratase medium subunit	ecl8_00923
pduC	962881	964545	c	Propanediol dehydratase large subunit	ecl8_00924
pduB	964564	965376	c	Propanediol utilization protein PduB	ecl8_00925
pduA_2	965373	965657	c	Propanediol utilization protein PduA	ecl8_00926
pduF	966177	966986		Propanediol diffusion facilitator	ecl8_00927
araC_1	967190	968101		Arabinose operon regulatory protein	ecl8_00928
cbiA	968654	970030		Cobyrinate a,c-diamide synthase	ecl8_00929
cobD_2	970027	970986		Cobalamin biosynthesis protein CobD	ecl8_00930
cbiC	970997	971632		Cobalt-precorrin-8 methylmutase	ecl8_00931
cbiD	971629	972768		Cobalt-precorrin-5B C(1)-methyltransferase	ecl8_00932
cbiE	972762	973367		Cobalt-precorrin-7 C(5)-methyltransferase	ecl8_00933
cbiT	973357	973926		Cobalt-precorrin-6B C(15)-methyltransferase (decarboxylating)	ecl8_00934
cbiF	973919	974692		Cobalt-precorrin-4 C(11)-methyltransferase	ecl8_00935
cbiG	974673	975728		Cobalt-precorrin-5A hydrolase	ecl8_00936
cbiH	975728	976453		putative cobalt-factor III C(17)-methyltransferase	ecl8_00937
cbiJ	976450	977235		Cobalt-precorrin-6A reductase	ecl8_00938
cbiK	977246	978040		Sirohydrochlorin cobaltochelatase	ecl8_00939
cbiL	978037	978750		Cobalt-precorrin-2 C(20)-methyltransferase	ecl8_00940
cbiM	978747	979484		Cobalt transport protein CbiM	ecl8_00941
cbiN	979486	979767		Cobalt transport protein CbiN	ecl8_00942
cbiQ	979754	980431		Cobalt transport protein CbiQ	ecl8_00943
cbiO_1	980440	981264		Cobalt import ATP-binding protein CbiO	ecl8_00944
cobQ	981261	982784		Cobyric acid synthase	ecl8_00945
cobU	982778	983323		Bifunctional adenosylcobalamin biosynthesis protein CobU	ecl8_00946
cobT_1	983367	984422		Nicotinate-nucleotide--dimethylbenzimidazole phosphoribosyltransferase	ecl8_00947
ecl8_00948	984518	984594	c	tRNA-Met	ecl8_00948
ecl8_00949	984627	984703	c	tRNA-Met	ecl8_00949
ecl8_00950	984737	984813	c	tRNA-Met	ecl8_00950
mltA	985024	986121		Membrane-bound lytic murein transglycosylase A	ecl8_00951
tcdA	986209	987030		tRNA threonylcarbamoyladenosine dehydratase	ecl8_00952
csdE	987073	987504	c	Sulfur acceptor protein CsdE	ecl8_00953
csdA	987504	988709	c	Cysteine desulfurase CsdA	ecl8_00954
ygdR_2	988901	989131		putative lipoprotein YgdR	ecl8_00955
gcvA_1	989576	990400		Glycine cleavage system transcriptional activator	ecl8_00956
ecl8_00957	990420	990815		hypothetical protein	ecl8_00957
rlmM	990808	991908		Ribosomal RNA large subunit methyltransferase M	ecl8_00958
ydjF	991957	992667	c	putative HTH-type transcriptional regulator YdjF	ecl8_00959
fucU	992726	993148	c	L-fucose mutarotase	ecl8_00960
fucK	993150	994568	c	L-fuculokinase	ecl8_00961
fucI	994676	996451	c	L-fucose isomerase	ecl8_00962
fucP	996484	997794	c	L-fucose-proton symporter	ecl8_00963
fucA	998361	999008		L-fuculose phosphate aldolase	ecl8_00964
fucO	999036	1000184		Lactaldehyde reductase	ecl8_00965
ygdG	1000243	1000998	c	Flap endonuclease Xni	ecl8_00966
zraR_1	1001095	1003038	c	Transcriptional regulatory protein ZraR	ecl8_00967
msuD_1	1003310	1004482		Methanesulfonate monooxygenase	ecl8_00968
ecl8_00969	1004529	1005926		hypothetical protein	ecl8_00969
dmoA	1006000	1007406		Dimethyl-sulfide monooxygenase	ecl8_00970
metN_1	1007403	1008425		Methionine import ATP-binding protein MetN	ecl8_00971
metI_1	1008422	1009120		D-methionine transport system permease protein MetI	ecl8_00972
metQ_1	1009117	1009995		D-methionine-binding lipoprotein MetQ	ecl8_00973
ygcS	1010189	1011610		Inner membrane metabolite transport protein YgcS	ecl8_00974
soxC	1011621	1012844		Dibenzothiophene desulfurization enzyme C	ecl8_00975
ssuA_1	1012890	1013831	c	Putative aliphatic sulfonates-binding protein	ecl8_00976
sdaB	1013970	1015337	c	L-serine dehydratase 2	ecl8_00977
sdaC_1	1015403	1016692	c	Serine transporter	ecl8_00978
ppnN	1017202	1018569	c	Pyrimidine/purine nucleotide 5'-monophosphate nucleosidase	ecl8_00979
queF	1018681	1019526	c	NADPH-dependent 7-cyano-7-deazaguanine reductase	ecl8_00980
syd	1019595	1020140		Protein Syd	ecl8_00981
yqcC	1020772	1021101		putative protein YqcC	ecl8_00982
truC	1021101	1021895		tRNA pseudouridine synthase C	ecl8_00983
ecl8_00984	1021900	1022343		hypothetical protein	ecl8_00984
gudP_1	1022815	1024167		putative glucarate transporter	ecl8_00985
gudX	1024170	1025510		Glucarate dehydratase-related protein	ecl8_00986
gudD	1025528	1026868		Glucarate dehydratase	ecl8_00987
garK_2	1026941	1028080		Glycerate 2-kinase	ecl8_00988
barA_1	1028238	1028501	c	Signal transduction histidine-protein kinase BarA	ecl8_00989
barA_2	1028495	1030987	c	Signal transduction histidine-protein kinase BarA	ecl8_00990
rlmD	1031101	1032405		23S rRNA (uracil(1939)-C(5))-methyltransferase RlmD	ecl8_00991
relA	1032527	1034764		GTP pyrophosphokinase	ecl8_00992
mazG	1034876	1035667		Nucleoside triphosphate pyrophosphohydrolase	ecl8_00993
pyrG_1	1035948	1037585		CTP synthase	ecl8_00994
eno	1037667	1038965		Enolase	ecl8_00995
lgrD	1039029	1040138	c	Linear gramicidin synthase subunit D	ecl8_00996
queE	1040613	1041284		7-carboxy-7-deazaguanine synthase	ecl8_00997
queD	1041325	1041690	c	6-carboxy-5,6,7,8-tetrahydropterin synthase	ecl8_00998
cysJ	1042007	1043806		Sulfite reductase [NADPH] flavoprotein alpha-component	ecl8_00999
cysI	1043806	1045518		Sulfite reductase [NADPH] hemoprotein beta-component	ecl8_01000
cysH_1	1045617	1046351		Phosphoadenosine phosphosulfate reductase	ecl8_01001
ywaD	1046424	1047470	c	Aminopeptidase YwaD	ecl8_01002
cysG_2	1047708	1049123		Siroheme synthase	ecl8_01003
cysD	1049133	1050041		Sulfate adenylyltransferase subunit 2	ecl8_01004
cysN	1050051	1051478		Sulfate adenylyltransferase subunit 1	ecl8_01005
cysC	1051478	1052083		Adenylyl-sulfate kinase	ecl8_01006
ygbE	1052134	1052460		Inner membrane protein YgbE	ecl8_01007
ftsB	1052601	1052918		Cell division protein FtsB	ecl8_01008
ispD	1052938	1053648		2-C-methyl-D-erythritol 4-phosphate cytidylyltransferase	ecl8_01009
ispF	1053648	1054127		2-C-methyl-D-erythritol 2,4-cyclodiphosphate synthase	ecl8_01010
truD	1054124	1055173		tRNA pseudouridine synthase D	ecl8_01011
surE	1055154	1055915		5'/3'-nucleotidase SurE	ecl8_01012
pcm	1055909	1056535		Protein-L-isoaspartate O-methyltransferase	ecl8_01013
nlpD_2	1056661	1057797		Murein hydrolase activator NlpD	ecl8_01014
rpoS	1057955	1058947		RNA polymerase sigma factor RpoS	ecl8_01015
ecl8_01016	1059000	1059377	c	hypothetical protein	ecl8_01016
hsrA_1	1059374	1060576	c	putative transport protein HsrA	ecl8_01017
dmlR_5	1060685	1061572		HTH-type transcriptional regulator DmlR	ecl8_01018
hosA	1061581	1061988	c	Transcriptional regulator HosA	ecl8_01019
ecdB	1062162	1062755		putative UbiX-like flavin prenyltransferase	ecl8_01020
edcC	1062755	1064182		Phenolic acid decarboxylase subunit C	ecl8_01021
bsdD	1064193	1064429		Phenolic acid decarboxylase subunit D	ecl8_01022
hokA_2	1064768	1064920		Protein HokA	ecl8_01023
mutS	1065040	1067601	c	DNA mismatch repair protein MutS	ecl8_01024
intA_2	1067862	1069163		Prophage integrase IntA	ecl8_01025
xerC_2	1069306	1070181	c	Tyrosine recombinase XerC	ecl8_01026
ecl8_01027	1071029	1071229	c	hypothetical protein	ecl8_01027
ecl8_01028	1071240	1071923	c	hypothetical protein	ecl8_01028
ecl8_01029	1072278	1073405	c	hypothetical protein	ecl8_01029
ecl8_01030	1074088	1075764	c	hypothetical protein	ecl8_01030
ecl8_01031	1075807	1076022	c	hypothetical protein	ecl8_01031
ecl8_01032	1076318	1076977	c	hypothetical protein	ecl8_01032
ecl8_01033	1077614	1078591	c	hypothetical protein	ecl8_01033
ecl8_01034	1078733	1081222	c	hypothetical protein	ecl8_01034
ftsH_2	1081231	1082217	c	ATP-dependent zinc metalloprotease FtsH	ecl8_01035
ecl8_01036	1082584	1082754		hypothetical protein	ecl8_01036
ecl8_01037	1082751	1083368	c	Adenosine monophosphate-protein transferase NmFic	ecl8_01037
hmuV_1	1083732	1084511	c	Hemin import ATP-binding protein HmuV	ecl8_01038
hmuU_1	1084504	1085499	c	Hemin transport system permease protein HmuU	ecl8_01039
hmuT_1	1085499	1086317	c	Hemin-binding periplasmic protein HmuT	ecl8_01040
hemS	1086314	1087345	c	Hemin transport protein HemS	ecl8_01041
ecl8_01042	1087417	1089780	c	putative hemoglobin and hemoglobin-haptoglobin-binding protein 2	ecl8_01042
ecl8_01043	1089996	1090289		hypothetical protein	ecl8_01043
ilvI_1	1090329	1092038	c	Acetolactate synthase isozyme 3 large subunit	ecl8_01044
ecl8_01045	1092074	1093015	c	hypothetical protein	ecl8_01045
tsaR_1	1093200	1094087		HTH-type transcriptional regulator TsaR	ecl8_01046
ecl8_01047	1094100	1094495		hypothetical protein	ecl8_01047
mntB_1	1094562	1095416	c	Manganese transport system membrane protein MntB	ecl8_01048
mntB_2	1095410	1096258	c	Manganese transport system membrane protein MntB	ecl8_01049
fhuC_1	1096255	1097076	c	Iron(3+)-hydroxamate import ATP-binding protein FhuC	ecl8_01050
hpf_2	1097073	1097990	c	Putative metal ABC transporter substrate-binding protein Hpf	ecl8_01051
galR_2	1098169	1099131	c	HTH-type transcriptional regulator GalR	ecl8_01052
mak_1	1099188	1100102	c	Fructokinase	ecl8_01053
chbA_2	1100153	1100467	c	PTS system N,N'-diacetylchitobiose-specific EIIA component	ecl8_01054
licC_3	1100491	1101813	c	Lichenan permease IIC component	ecl8_01055
gmuB	1101823	1102137	c	PTS system oligo-beta-mannoside-specific EIIB component	ecl8_01056
licC_4	1102315	1103586		Lichenan permease IIC component	ecl8_01057
scrY_1	1103849	1105186		Sucrose porin	ecl8_01058
ecl8_01059	1105199	1107391		hypothetical protein	ecl8_01059
gmuD_2	1107442	1108842		6-phospho-beta-glucosidase GmuD	ecl8_01060
fhlA	1108896	1110968	c	Formate hydrogenlyase transcriptional activator	ecl8_01061
hypE	1111205	1112215	c	Carbamoyl dehydratase HypE	ecl8_01062
hypD	1112212	1113333	c	Hydrogenase maturation factor HypD	ecl8_01063
hypC	1113333	1113605	c	Hydrogenase maturation factor HypC	ecl8_01064
hypB	1113596	1114468	c	Hydrogenase maturation factor HypB	ecl8_01065
hypA	1114472	1114816	c	Hydrogenase maturation factor HypA	ecl8_01066
hycA	1115026	1115475		Formate hydrogenlyase regulatory protein HycA	ecl8_01067
hyfA_1	1115558	1116166		Hydrogenase-4 component A	ecl8_01068
hyfB	1116163	1117989		Hydrogenase-4 component B	ecl8_01069
hycD	1117992	1118915		Formate hydrogenlyase subunit 4	ecl8_01070
hycE	1118932	1120641		Formate hydrogenlyase subunit 5	ecl8_01071
nuoI_1	1120651	1121193		NADH-quinone oxidoreductase subunit I	ecl8_01072
hycG	1121193	1121960		Formate hydrogenlyase subunit 7	ecl8_01073
ecl8_01074	1121957	1122367		hypothetical protein	ecl8_01074
hycI	1122360	1122830		Hydrogenase 3 maturation protease	ecl8_01075
symE	1122827	1123135	c	Toxic protein SymE	ecl8_01076
bglH_1	1123317	1124741	c	Aryl-phospho-beta-D-glucosidase BglH	ecl8_01077
bglF_1	1124768	1126210	c	PTS system beta-glucoside-specific EIIBCA component	ecl8_01078
ascG_3	1126478	1127491		HTH-type transcriptional regulator AscG	ecl8_01079
hyfA_2	1127628	1128155		Hydrogenase-4 component A	ecl8_01080
hypF	1128164	1130398		Carbamoyltransferase HypF	ecl8_01081
hoxN	1130395	1131408		High-affinity nickel transport protein	ecl8_01082
norW	1131504	1132637	c	Nitric oxide reductase FlRd-NAD(+) reductase	ecl8_01083
norV	1132634	1134082	c	Anaerobic nitric oxide reductase flavorubredoxin	ecl8_01084
norR	1134270	1135820		Anaerobic nitric oxide reductase transcription regulator NorR	ecl8_01085
gutQ	1135783	1136748	c	Arabinose 5-phosphate isomerase GutQ	ecl8_01086
srlR_1	1136741	1137514	c	Glucitol operon repressor	ecl8_01087
ecl8_01088	1137581	1137940	c	hypothetical protein	ecl8_01088
srlD	1138098	1138877	c	Sorbitol-6-phosphate 2-dehydrogenase	ecl8_01089
srlB_1	1138890	1139252	c	PTS system glucitol/sorbitol-specific EIIA component	ecl8_01090
srlE	1139266	1140246	c	PTS system glucitol/sorbitol-specific EIIB component	ecl8_01091
srlA	1140243	1140806	c	PTS system glucitol/sorbitol-specific EIIC component	ecl8_01092
mltB	1141083	1142162		Membrane-bound lytic murein transglycosylase B	ecl8_01093
fepC_1	1142501	1143211		Ferric enterobactin transport ATP-binding protein FepC	ecl8_01094
mntB_3	1143208	1144071		Manganese transport system membrane protein MntB	ecl8_01095
mntA	1144079	1144957		Manganese-binding lipoprotein MntA	ecl8_01096
pncC_1	1145097	1145594		Nicotinamide-nucleotide amidohydrolase PncC	ecl8_01097
recA	1145685	1146743		Protein RecA	ecl8_01098
recX	1146811	1147311		Regulatory protein RecX	ecl8_01099
alaS	1147562	1150189		Alanine--tRNA ligase	ecl8_01100
csrA	1150553	1150738		Carbon storage regulator	ecl8_01101
ecl8_01102	1151061	1151153		tRNA-Ser	ecl8_01102
ecl8_01103	1151158	1151234		tRNA-Arg	ecl8_01103
ecl8_01104	1151385	1151461		tRNA-Arg	ecl8_01104
ecl8_01105	1151523	1151599		tRNA-Arg	ecl8_01105
ecl8_01106	1151828	1151904		tRNA-Arg	ecl8_01106
osmY_2	1152260	1152574		Osmotically-inducible protein Y	ecl8_01107
yqaB	1152700	1153266		Fructose-1-phosphate phosphatase YqaB	ecl8_01108
yqaA	1153263	1153691		Inner membrane protein YqaA	ecl8_01109
gshA	1153758	1155314		Glutamate--cysteine ligase	ecl8_01110
luxS	1155471	1155986		S-ribosylhomocysteine lyase	ecl8_01111
nimR_1	1156039	1156806		HTH-type transcriptional regulator NimR	ecl8_01112
leuA_1	1156785	1158461	c	2-isopropylmalate synthase	ecl8_01113
emrB_1	1158598	1160136	c	Multidrug export protein EmrB	ecl8_01114
emrA_1	1160152	1161324	c	Multidrug export protein EmrA	ecl8_01115
mprA	1161450	1161980	c	Transcriptional repressor MprA	ecl8_01116
ecl8_01117	1162071	1162406	c	hypothetical protein	ecl8_01117
ygaZ_1	1162396	1163142	c	Inner membrane protein YgaZ	ecl8_01118
proX	1163321	1164319	c	Glycine betaine/proline betaine-binding periplasmic protein	ecl8_01119
proW	1164398	1165465	c	Glycine betaine/proline betaine transport system permease protein ProW	ecl8_01120
proV	1165458	1166660	c	Glycine betaine/proline betaine transport system ATP-binding protein ProV	ecl8_01121
nrdF	1167017	1167979	c	Ribonucleoside-diphosphate reductase 2 subunit beta	ecl8_01122
nrdE	1167990	1170131	c	Ribonucleoside-diphosphate reductase 2 subunit alpha	ecl8_01123
nrdI	1170104	1170514	c	Protein NrdI	ecl8_01124
nrdH	1170511	1170756	c	Glutaredoxin-like protein NrdH	ecl8_01125
ahpD_1	1170940	1171371	c	Alkyl hydroperoxide reductase AhpD	ecl8_01126
gabR_2	1171460	1172812		HTH-type transcriptional regulatory protein GabR	ecl8_01127
ygaM	1172956	1173303	c	putative protein YgaM	ecl8_01128
ecl8_01129	1173453	1173815		hypothetical protein	ecl8_01129
alaE	1173901	1174350	c	L-alanine exporter AlaE	ecl8_01130
stpA	1175079	1175480		DNA-binding protein StpA	ecl8_01131
ecl8_01132	1175553	1175732	c	hypothetical protein	ecl8_01132
ecl8_01133	1175938	1176840		hypothetical protein	ecl8_01133
ygaP	1176821	1177366	c	Inner membrane protein YgaP	ecl8_01134
ygaV	1177374	1177673	c	putative HTH-type transcriptional regulator YgaV	ecl8_01135
azoR_1	1177749	1178354	c	FMN-dependent NADH-azoreductase	ecl8_01136
dmlR_6	1178458	1179366		HTH-type transcriptional regulator DmlR	ecl8_01137
acoR_1	1179449	1180378	c	Acetoin catabolism regulatory protein	ecl8_01138
acoR_2	1180369	1181235	c	Acetoin dehydrogenase operon transcriptional activator AcoR	ecl8_01139
ald1	1181499	1183019		Long-chain-aldehyde dehydrogenase	ecl8_01140
fimA_1	1183720	1184301		Type-1 fimbrial protein, A chain	ecl8_01141
yraI_1	1184496	1185158		putative fimbrial chaperone YraI	ecl8_01142
fimD_2	1185195	1187750		Outer membrane usher protein FimD	ecl8_01143
ecl8_01144	1187758	1188852		hypothetical protein	ecl8_01144
lpfB_1	1188767	1189537	c	putative fimbrial chaperone LpfB	ecl8_01145
fim_2	1189574	1190125	c	Fimbrial subunit type 1	ecl8_01146
pheC	1190499	1191425		Cyclohexadienyl dehydratase	ecl8_01147
ecl8_01148	1191481	1192101	c	hypothetical protein	ecl8_01148
fabG_3	1192257	1193051	c	3-oxoacyl-[acyl-carrier-protein] reductase FabG	ecl8_01149
ghrA_1	1193112	1194044	c	Glyoxylate/hydroxypyruvate reductase A	ecl8_01150
cloR	1194050	1194778	c	4-hydroxy-3-prenylphenylpyruvate oxygenase/4-hydroxy-3-prenylbenzoate synthase	ecl8_01151
tcyC	1194779	1196299	c	L-cystine import ATP-binding protein TcyC	ecl8_01152
artJ_1	1196330	1197133	c	ABC transporter arginine-binding protein 1	ecl8_01153
efe_1	1197153	1198220	c	2-oxoglutarate-dependent ethylene/succinate-forming enzyme	ecl8_01154
ecl8_01155	1198217	1199080	c	hypothetical protein	ecl8_01155
gbuA	1199091	1200041	c	Guanidinobutyrase	ecl8_01156
cbl_1	1200157	1201068		HTH-type transcriptional regulator cbl	ecl8_01157
nsrR_1	1201467	1201946		HTH-type transcriptional repressor NsrR	ecl8_01158
bepE_1	1202016	1205168	c	Efflux pump membrane transporter BepE	ecl8_01159
bepF	1205192	1206367	c	Efflux pump periplasmic linker BepF	ecl8_01160
rob_1	1206698	1207063		Right origin-binding protein	ecl8_01161
ecl8_01162	1207074	1207799	c	hypothetical protein	ecl8_01162
pgrR_2	1207858	1208742		HTH-type transcriptional regulator PgrR	ecl8_01163
ecl8_01164	1208867	1209667		hypothetical protein	ecl8_01164
ecl8_01165	1210167	1210823	c	hypothetical protein	ecl8_01165
ecl8_01166	1211315	1212412	c	hypothetical protein	ecl8_01166
ecl8_01167	1213175	1213519	c	hypothetical protein	ecl8_01167
ecl8_01168	1214399	1215460		hypothetical protein	ecl8_01168
ecl8_01169	1215508	1217466	c	hypothetical protein	ecl8_01169
intA_3	1217476	1218072	c	Prophage integrase IntA	ecl8_01170
ecl8_01171	1218450	1218623	c	hypothetical protein	ecl8_01171
ssrA	1218774	1219136	c	transfer-messenger RNA, SsrA	ecl8_01172
smpB	1219281	1219763	c	SsrA-binding protein	ecl8_01173
ratA	1219913	1220350		Ribosome association toxin RatA	ecl8_01174
ecl8_01175	1220340	1220630		hypothetical protein	ecl8_01175
bamE_1	1220697	1221038	c	Outer membrane protein assembly factor BamE	ecl8_01176
recN	1221186	1222847	c	DNA repair protein RecN	ecl8_01177
nadK	1222934	1223812	c	NAD kinase	ecl8_01178
grpE	1223937	1224527		Protein GrpE	ecl8_01179
ecl8_01180	1224647	1225933	c	hypothetical protein	ecl8_01180
ypjD	1225953	1226744	c	Inner membrane protein YpjD	ecl8_01181
ffh	1226908	1228272		Signal recognition particle protein	ecl8_01182
rpsP	1228532	1228780		30S ribosomal protein S16	ecl8_01183
rimM	1228799	1229347		Ribosome maturation factor RimM	ecl8_01184
trmD	1229379	1230146		tRNA (guanine-N(1)-)-methyltransferase	ecl8_01185
rplS	1230186	1230533		50S ribosomal protein L19	ecl8_01186
ecl8_01187	1230653	1231111		hypothetical protein	ecl8_01187
ecl8_01188	1231168	1232538		hypothetical protein	ecl8_01188
ecl8_01189	1232547	1233029	c	Outer membrane protein Omp38	ecl8_01189
dgcN	1233043	1234266	c	Diguanylate cyclase DgcN	ecl8_01190
ecl8_01191	1234259	1234768	c	hypothetical protein	ecl8_01191
aroF	1235111	1236181		Phospho-2-dehydro-3-deoxyheptonate aldolase, Tyr-sensitive	ecl8_01192
tyrA	1236191	1237312		T-protein	ecl8_01193
ecl8_01194	1237375	1238247		6-deoxy-6-sulfogluconolactonase	ecl8_01194
pheA	1238244	1239404	c	P-protein	ecl8_01195
raiA	1239659	1239994	c	Ribosome-associated inhibitor A	ecl8_01196
bamD	1240265	1241002	c	Outer membrane protein assembly factor BamD	ecl8_01197
rluD	1241134	1242114		Ribosomal large subunit pseudouridine synthase D	ecl8_01198
yfiH	1242111	1242842		Polyphenol oxidase	ecl8_01199
clpB	1242972	1245545		Chaperone protein ClpB	ecl8_01200
ecl8_01201	1246014	1247549		16S ribosomal RNA	ecl8_01201
ecl8_01202	1247636	1247711		tRNA-Glu	ecl8_01202
ecl8_01203	1247896	1250794		23S ribosomal RNA	ecl8_01203
ecl8_01204	1250993	1251103		5S ribosomal RNA	ecl8_01204
kgtP_1	1251549	1252847		Alpha-ketoglutarate permease	ecl8_01205
ecl8_01206	1252851	1253174	c	hypothetical protein	ecl8_01206
pssA	1253216	1254571	c	CDP-diacylglycerol--serine O-phosphatidyltransferase	ecl8_01207
pat_1	1254692	1257343	c	Protein lysine acetyltransferase Pat	ecl8_01208
ecl8_01209	1257378	1258076	c	hypothetical protein	ecl8_01209
trxC	1258146	1258571	c	Thioredoxin 2	ecl8_01210
yfiF	1258775	1259860		putative tRNA/rRNA methyltransferase YfiF	ecl8_01211
ung	1259918	1260607	c	Uracil-DNA glycosylase	ecl8_01212
grcA	1260920	1261303		Autonomous glycyl radical cofactor	ecl8_01213
srmB	1261348	1262679	c	ATP-dependent RNA helicase SrmB	ecl8_01214
yfiC	1262811	1263548		tRNA1(Val) (adenine(37)-N6)-methyltransferase	ecl8_01215
nadB	1263533	1265152	c	L-aspartate oxidase	ecl8_01216
rpoE	1265573	1266148		ECF RNA polymerase sigma-E factor	ecl8_01217
rseA	1266181	1266831		Anti-sigma-E factor RseA	ecl8_01218
rseB	1266831	1267787		Sigma-E factor regulatory protein RseB	ecl8_01219
rseC	1267784	1268263		Protein RseC	ecl8_01220
lepA	1268449	1270248		Elongation factor 4	ecl8_01221
lepB	1270264	1271238		Signal peptidase I	ecl8_01222
rnc	1271488	1272168		Ribonuclease 3	ecl8_01223
era	1272165	1273070		GTPase Era	ecl8_01224
recO	1273082	1273819		DNA repair protein RecO	ecl8_01225
pdxJ	1273831	1274562		Pyridoxine 5'-phosphate synthase	ecl8_01226
acpS	1274562	1274942		Holo-[acyl-carrier-protein] synthase	ecl8_01227
yfhL	1274955	1275215	c	Ferredoxin YfhL	ecl8_01228
murR	1275272	1276120	c	HTH-type transcriptional regulator MurR	ecl8_01229
pgpC	1276333	1276968		Phosphatidylglycerophosphatase C	ecl8_01230
tadA	1277031	1277540		tRNA-specific adenosine deaminase	ecl8_01231
mltF_1	1277537	1279153	c	Membrane-bound lytic murein transglycosylase F	ecl8_01232
purL	1279329	1283216		Phosphoribosylformylglycinamidine synthase	ecl8_01233
glrK	1283807	1285228		Sensor histidine kinase GlrK	ecl8_01234
qseG	1285258	1285944		Quorum-sensing regulator protein G	ecl8_01235
glrR	1285931	1287268		Transcriptional regulatory protein GlrR	ecl8_01236
glnB	1287334	1287672		Nitrogen regulatory protein P-II	ecl8_01237
hmp	1287747	1288937	c	Flavohemoprotein	ecl8_01238
glyA1	1289263	1290516		Serine hydroxymethyltransferase 1	ecl8_01239
yphA_1	1290572	1290859	c	Inner membrane protein YphA	ecl8_01240
yphA_2	1290896	1290994	c	Inner membrane protein YphA	ecl8_01241
nagC_1	1291068	1292264	c	N-acetylglucosamine repressor	ecl8_01242
lapB_1	1292377	1295652		Lipopolysaccharide assembly protein B	ecl8_01243
xylE	1295722	1297158		D-xylose-proton symporter	ecl8_01244
yphB	1297158	1297991		putative protein YphB	ecl8_01245
hcaT	1298074	1299210		putative 3-phenylpropionic acid transporter	ecl8_01246
ecl8_01247	1299207	1300484	c	hypothetical protein	ecl8_01247
ecl8_01248	1300609	1301247		hypothetical protein	ecl8_01248
ecl8_01249	1301238	1302218		hypothetical protein	ecl8_01249
ecl8_01250	1302318	1303154		hypothetical protein	ecl8_01250
suhB_1	1303201	1304004	c	Inositol-1-monophosphatase	ecl8_01251
trmJ	1304125	1304859		tRNA (cytidine/uridine-2'-O-)-methyltransferase TrmJ	ecl8_01252
iscR	1305094	1305585		HTH-type transcriptional regulator IscR	ecl8_01253
iscS	1305764	1306978		Cysteine desulfurase IscS	ecl8_01254
iscU	1307005	1307391		Iron-sulfur cluster assembly scaffold protein IscU	ecl8_01255
iscA	1307409	1307732		Iron-binding protein IscA	ecl8_01256
hscB	1307807	1308322		Co-chaperone protein HscB	ecl8_01257
hscA	1308338	1310188		Chaperone protein HscA	ecl8_01258
fdx	1310190	1310525		2Fe-2S ferredoxin	ecl8_01259
iscX	1310527	1310727		Protein IscX	ecl8_01260
pepB	1310798	1312084		Peptidase B	ecl8_01261
ecl8_01262	1312183	1312959		hypothetical protein	ecl8_01262
ecl8_01263	1313030	1313872	c	hypothetical protein	ecl8_01263
ecl8_01264	1313975	1314625	c	hypothetical protein	ecl8_01264
sseA	1314790	1315647	c	3-mercaptopyruvate sulfurtransferase	ecl8_01265
yfhM	1315853	1320802		putative lipoprotein YfhM	ecl8_01266
pbpC	1320803	1323127		Penicillin-binding protein 1C	ecl8_01267
ndk	1323288	1323719		Nucleoside diphosphate kinase	ecl8_01268
rlmN	1324202	1325368		Dual-specificity RNA methyltransferase RlmN	ecl8_01269
rodZ	1325645	1326640		Cytoskeleton protein RodZ	ecl8_01270
ispG	1326667	1327788		4-hydroxy-3-methylbut-2-en-1-yl diphosphate synthase (flavodoxin)	ecl8_01271
hisS	1327880	1329154		Histidine--tRNA ligase	ecl8_01272
ecl8_01273	1329189	1329809		hypothetical protein	ecl8_01273
bamB	1329820	1330998		Outer membrane protein assembly factor BamB	ecl8_01274
der	1331112	1332590		GTPase Der	ecl8_01275
ecl8_01276	1332708	1333787		hypothetical protein	ecl8_01276
yfgJ	1333837	1334055		putative protein YfgJ	ecl8_01277
xseA	1334039	1335430	c	Exodeoxyribonuclease 7 large subunit	ecl8_01278
guaB	1335589	1337055		Inosine-5'-monophosphate dehydrogenase	ecl8_01279
guaA	1337123	1338700		GMP synthase [glutamine-hydrolyzing]	ecl8_01280
betC	1338795	1340663	c	Choline-sulfatase	ecl8_01281
chuR_2	1340647	1341825	c	Anaerobic sulfatase-maturating enzyme	ecl8_01282
ecl8_01283	1342119	1343351	c	hypothetical protein	ecl8_01283
yofA_1	1343449	1344336		HTH-type transcriptional regulator YofA	ecl8_01284
ecl8_01285	1344433	1344606	c	hypothetical protein	ecl8_01285
pdeF	1344977	1347205		Cyclic di-GMP phosphodiesterase PdeF	ecl8_01286
ppx	1347259	1348791	c	Exopolyphosphatase	ecl8_01287
ppk	1348795	1350855	c	Polyphosphate kinase	ecl8_01288
purN	1351036	1351677	c	Phosphoribosylglycinamide formyltransferase	ecl8_01289
purM	1351674	1352711	c	Phosphoribosylformylglycinamidine cyclo-ligase	ecl8_01290
bglK	1352975	1353868		Beta-glucoside kinase	ecl8_01291
bglA_2	1353878	1355311		6-phospho-beta-glucosidase BglA	ecl8_01292
upp	1355529	1356155		Uracil phosphoribosyltransferase	ecl8_01293
uraA	1356251	1357537		Uracil permease	ecl8_01294
hda	1357660	1358337		DnaA regulatory inactivator Hda	ecl8_01295
rpnA_1	1358334	1359245	c	Recombination-promoting nuclease RpnA	ecl8_01296
yfgD	1359373	1359732	c	putative protein YfgD	ecl8_01297
bepA	1359742	1361205	c	Beta-barrel assembly-enhancing protease	ecl8_01298
yhhT_2	1361428	1362489		Putative transport protein YhhT	ecl8_01299
bcp	1362551	1363021	c	Peroxiredoxin Bcp	ecl8_01300
gcvR	1363025	1363591	c	Glycine cleavage system transcriptional repressor	ecl8_01301
dapA_1	1363745	1364623		4-hydroxy-tetrahydrodipicolinate synthase	ecl8_01302
bamC	1364640	1365674		Outer membrane protein assembly factor BamC	ecl8_01303
purC	1365891	1366604		Phosphoribosylaminoimidazole-succinocarboxamide synthase	ecl8_01304
ecl8_01305	1366724	1367599		hypothetical protein	ecl8_01305
tmcA	1367609	1369612		tRNA(Met) cytidine acetyltransferase TmcA	ecl8_01306
ecl8_01307	1369689	1370384		hypothetical protein	ecl8_01307
ecl8_01308	1370433	1370636	c	hypothetical protein	ecl8_01308
dapE	1370663	1371790	c	Succinyl-diaminopimelate desuccinylase	ecl8_01309
yffB	1371794	1372147	c	Protein YffB	ecl8_01310
acrB_1	1372700	1375813	c	Multidrug efflux pump subunit AcrB	ecl8_01311
gltD_2	1376186	1378168		Glutamate synthase [NADPH] small chain	ecl8_01312
nudK_1	1378227	1378823		GDP-mannose pyrophosphatase NudK	ecl8_01313
ecl8_01314	1378887	1379933		hypothetical protein	ecl8_01314
tktB	1379923	1381917	c	Transketolase 2	ecl8_01315
tal	1381934	1382890	c	Transaldolase	ecl8_01316
maeB	1383185	1385464		NADP-dependent malic enzyme	ecl8_01317
eutS	1385683	1386018		Ethanolamine utilization protein EutS	ecl8_01318
pduV_2	1386031	1386510		Propanediol utilization protein PduV	ecl8_01319
eutQ	1386488	1387177		Ethanolamine utilization protein EutQ	ecl8_01320
ecl8_01321	1387174	1387980		hypothetical protein	ecl8_01321
eutD	1387970	1388986		Ethanolamine utilization protein EutD	ecl8_01322
eutM	1389025	1389315		Ethanolamine utilization protein EutM	ecl8_01323
eutN	1389444	1389731		Ethanolamine utilization protein EutN	ecl8_01324
adhE_3	1389743	1391146		Aldehyde-alcohol dehydrogenase	ecl8_01325
ftsA_1	1391156	1391995		Cell division protein FtsA	ecl8_01326
mdh_2	1391985	1393172		NAD-dependent methanol dehydrogenase	ecl8_01327
ecl8_01328	1393372	1394604		hypothetical protein	ecl8_01328
ecl8_01329	1394601	1396004		hypothetical protein	ecl8_01329
eutB_1	1396016	1397377		Ethanolamine ammonia-lyase heavy chain	ecl8_01330
eutC_1	1397398	1398297		Ethanolamine ammonia-lyase light chain	ecl8_01331
eutL	1398307	1398966		Ethanolamine utilization protein EutL	ecl8_01332
eutK	1398978	1399463		Ethanolamine utilization protein EutK	ecl8_01333
ecl8_01334	1399509	1400561		hypothetical protein	ecl8_01334
hemF	1400605	1401504	c	Oxygen-dependent coproporphyrinogen-III oxidase	ecl8_01335
amiA	1401504	1402376	c	N-acetylmuramoyl-L-alanine amidase AmiA	ecl8_01336
ypeA	1402588	1403013		Acetyltransferase YpeA	ecl8_01337
yfeZ	1403000	1403449		Inner membrane protein YfeZ	ecl8_01338
yfeY	1403511	1404086		putative protein YfeY	ecl8_01339
yfeX	1404181	1405080		putative deferrochelatase/peroxidase YfeX	ecl8_01340
cysP	1405720	1406736		Thiosulfate-binding protein	ecl8_01341
cysT	1406736	1407569		Sulfate transport system permease protein CysT	ecl8_01342
cysW_1	1407569	1408444		Sulfate transport system permease protein CysW	ecl8_01343
cysA_1	1408434	1409528		Sulfate/thiosulfate import ATP-binding protein CysA	ecl8_01344
cysM	1409647	1410558		Cysteine synthase B	ecl8_01345
yybH	1410555	1410950	c	putative protein YybH	ecl8_01346
ptsJ_1	1411091	1412389	c	Vitamin B6 salvage pathway transcriptional repressor PtsJ	ecl8_01347
pdxK	1412472	1413338		Pyridoxine/pyridoxal/pyridoxamine kinase	ecl8_01348
ecl8_01349	1413335	1413574		hypothetical protein	ecl8_01349
crr	1413616	1414125	c	PTS system glucose-specific EIIA component	ecl8_01350
ptsI	1414168	1415895	c	Phosphoenolpyruvate-protein phosphotransferase	ecl8_01351
ptsH	1415940	1416197	c	Phosphocarrier protein HPr	ecl8_01352
cysK	1416578	1417549	c	Cysteine synthase A	ecl8_01353
cysZ	1417726	1418487	c	Sulfate transporter CysZ	ecl8_01354
zipA	1418718	1419779		Cell division protein ZipA	ecl8_01355
ligA	1419849	1421864		DNA ligase	ecl8_01356
ecl8_01357	1421866	1422084		hypothetical protein	ecl8_01357
ecl8_01358	1422081	1423079	c	hypothetical protein	ecl8_01358
cynR_1	1423168	1424094		HTH-type transcriptional regulator CynR	ecl8_01359
ecl8_01360	1424179	1424254	c	tRNA-Lys	ecl8_01360
ecl8_01361	1424259	1424334	c	tRNA-Val	ecl8_01361
ecl8_01362	1424381	1424456	c	tRNA-Val	ecl8_01362
ecl8_01363	1424502	1424577	c	tRNA-Val	ecl8_01363
gltX	1424837	1426255		Glutamate--tRNA ligase	ecl8_01364
ecl8_01365	1426307	1426699	c	hypothetical protein	ecl8_01365
ecl8_01366	1426703	1427056	c	hypothetical protein	ecl8_01366
ecl8_01367	1427276	1427351		tRNA-Ala	ecl8_01367
ecl8_01368	1427393	1427468		tRNA-Ala	ecl8_01368
pdeA	1427678	1429849		putative cyclic di-GMP phosphodiesterase PdeA	ecl8_01369
nupC_1	1429898	1431100	c	Nucleoside permease NupC	ecl8_01370
mntH	1431447	1432688		Divalent metal cation transporter MntH	ecl8_01371
ecl8_01372	1432746	1433099	c	hypothetical protein	ecl8_01372
gpr	1433230	1434222	c	L-glyceraldehyde 3-phosphate reductase	ecl8_01373
ipdC	1434403	1436064		Indole-3-pyruvate decarboxylase	ecl8_01374
yfeO	1436061	1437296	c	Putative ion-transport protein YfeO	ecl8_01375
glk	1437560	1438525		Glucokinase	ecl8_01376
ypdB	1438579	1439316	c	Transcriptional regulatory protein YpdB	ecl8_01377
ypdA	1439328	1441025	c	Sensor histidine kinase YpdA	ecl8_01378
alaC	1441408	1442622		Glutamate-pyruvate aminotransferase AlaC	ecl8_01379
yycB	1443103	1444299	c	putative transporter YycB	ecl8_01380
guaD_1	1444296	1444754	c	Guanine deaminase	ecl8_01381
cynR_2	1444887	1445795		HTH-type transcriptional regulator CynR	ecl8_01382
ecl8_01383	1445805	1446686	c	hypothetical protein	ecl8_01383
ecl8_01384	1447055	1447537	c	hypothetical protein	ecl8_01384
ecl8_01385	1447786	1447860	c	tRNA-Arg	ecl8_01385
intA_4	1448056	1449225		Prophage integrase IntA	ecl8_01386
ecl8_01387	1449330	1450160		hypothetical protein	ecl8_01387
ecl8_01388	1450467	1450988	c	hypothetical protein	ecl8_01388
ecl8_01389	1450981	1451181	c	hypothetical protein	ecl8_01389
ecl8_01390	1451178	1451417	c	hypothetical protein	ecl8_01390
ecl8_01391	1451410	1451613	c	hypothetical protein	ecl8_01391
ecl8_01392	1451610	1452395	c	hypothetical protein	ecl8_01392
ecl8_01393	1452395	1452694	c	hypothetical protein	ecl8_01393
rdgC_1	1452782	1453705	c	Recombination-associated protein RdgC	ecl8_01394
lexA_1	1453987	1454247	c	LexA repressor	ecl8_01395
ecl8_01396	1454961	1455422		hypothetical protein	ecl8_01396
ecl8_01397	1455829	1456743		hypothetical protein	ecl8_01397
dam_2	1456740	1457549		DNA adenine methylase	ecl8_01398
rusA	1457559	1457936		Crossover junction endodeoxyribonuclease RusA	ecl8_01399
ecl8_01400	1458021	1458929		hypothetical protein	ecl8_01400
ecl8_01401	1458943	1459521		hypothetical protein	ecl8_01401
ecl8_01402	1459691	1459766		tRNA-Thr	ecl8_01402
ecl8_01403	1460177	1461022		hypothetical protein	ecl8_01403
ecl8_01404	1461786	1462181		hypothetical protein	ecl8_01404
ecl8_01405	1462168	1462449		hypothetical protein	ecl8_01405
ecl8_01406	1462449	1463078		hypothetical protein	ecl8_01406
ecl8_01407	1463081	1463356		hypothetical protein	ecl8_01407
ecl8_01408	1463301	1463498		hypothetical protein	ecl8_01408
ecl8_01409	1463587	1463832		hypothetical protein	ecl8_01409
ecl8_01410	1463904	1464107		hypothetical protein	ecl8_01410
ecl8_01411	1464190	1464423		hypothetical protein	ecl8_01411
ecl8_01412	1464411	1464761		hypothetical protein	ecl8_01412
ecl8_01413	1464892	1465386		hypothetical protein	ecl8_01413
ecl8_01414	1465383	1467113		hypothetical protein	ecl8_01414
ecl8_01415	1467123	1467308		hypothetical protein	ecl8_01415
ecl8_01416	1467308	1468537		hypothetical protein	ecl8_01416
ecl8_01417	1468521	1469177		hypothetical protein	ecl8_01417
ecl8_01418	1469192	1470400		hypothetical protein	ecl8_01418
ecl8_01419	1470639	1470959		hypothetical protein	ecl8_01419
ecl8_01420	1471029	1471226		hypothetical protein	ecl8_01420
ecl8_01421	1471228	1471560		hypothetical protein	ecl8_01421
ecl8_01422	1471553	1472092		hypothetical protein	ecl8_01422
ecl8_01423	1472089	1472454		hypothetical protein	ecl8_01423
ecl8_01424	1472511	1473002		hypothetical protein	ecl8_01424
ecl8_01425	1473046	1473429		hypothetical protein	ecl8_01425
ecl8_01426	1473432	1473695		hypothetical protein	ecl8_01426
bamE_2	1473759	1474136		Outer membrane protein assembly factor BamE	ecl8_01427
ecl8_01428	1474198	1476744		hypothetical protein	ecl8_01428
ecl8_01429	1477210	1477692		hypothetical protein	ecl8_01429
ecl8_01430	1477702	1478082		hypothetical protein	ecl8_01430
ecl8_01431	1478079	1481147		hypothetical protein	ecl8_01431
ecl8_01432	1481225	1483378		hypothetical protein	ecl8_01432
ecl8_01433	1483391	1484125		hypothetical protein	ecl8_01433
ecl8_01434	1484266	1484397		hypothetical protein	ecl8_01434
ecl8_01435	1484503	1484832	c	hypothetical protein	ecl8_01435
ecl8_01436	1484916	1485131		hypothetical protein	ecl8_01436
ecl8_01437	1485186	1485425		hypothetical protein	ecl8_01437
ecl8_01438	1485382	1485753		hypothetical protein	ecl8_01438
yfdC	1485960	1486889	c	Inner membrane protein YfdC	ecl8_01439
mlaA	1487179	1487940		putative phospholipid-binding lipoprotein MlaA	ecl8_01440
fadL	1488002	1489324	c	Long-chain fatty acid transport protein	ecl8_01441
ecl8_01442	1489698	1489982		hypothetical protein	ecl8_01442
fadI	1490142	1491452		3-ketoacyl-CoA thiolase FadI	ecl8_01443
fadJ	1491452	1493596		Fatty acid oxidation complex subunit alpha	ecl8_01444
sixA	1493905	1494291		Phosphohistidine phosphatase SixA	ecl8_01445
smrA_1	1494312	1494863	c	putative DNA endonuclease SmrA	ecl8_01446
prmB	1495031	1495963		50S ribosomal protein L3 glutamine methyltransferase	ecl8_01447
aroC	1496005	1497090		Chorismate synthase	ecl8_01448
mepA	1497093	1497917		Penicillin-insensitive murein endopeptidase	ecl8_01449
yfcA	1497917	1498726		putative membrane transporter protein YfcA	ecl8_01450
epmC	1498726	1499274		Elongation factor P hydroxylase	ecl8_01451
ecl8_01452	1499306	1499587		hypothetical protein	ecl8_01452
mnmC	1499649	1501637	c	tRNA 5-methylaminomethyl-2-thiouridine biosynthesis bifunctional protein MnmC	ecl8_01453
fabB	1501796	1503016		3-oxoacyl-[acyl-carrier-protein] synthase 1	ecl8_01454
yfcJ	1503226	1504401		putative MFS-type transporter YfcJ	ecl8_01455
flk	1504488	1505465	c	Flagellar regulator flk	ecl8_01456
pdxB	1505576	1506712		Erythronate-4-phosphate dehydrogenase	ecl8_01457
usg	1506776	1507789		USG-1 protein	ecl8_01458
truA	1507789	1508601		tRNA pseudouridine synthase A	ecl8_01459
dedA	1508628	1509287		Protein DedA	ecl8_01460
accD	1509411	1510394		Acetyl-coenzyme A carboxylase carboxyl transferase subunit beta	ecl8_01461
folC	1510470	1511738		Dihydrofolate synthase/folylpolyglutamate synthase	ecl8_01462
dedD	1511728	1512417		Cell division protein DedD	ecl8_01463
cvpA	1512634	1513122		Colicin V production protein	ecl8_01464
purF	1513156	1514673		Amidophosphoribosyltransferase	ecl8_01465
ubiX	1514809	1515378		Flavin prenyltransferase UbiX	ecl8_01466
argT	1515666	1516448		Lysine/arginine/ornithine-binding periplasmic protein	ecl8_01467
hisJ_1	1516716	1517498		Histidine-binding periplasmic protein	ecl8_01468
hisQ_1	1517563	1518249		Histidine transport system permease protein HisQ	ecl8_01469
hisM	1518246	1518962		Histidine transport system permease protein HisM	ecl8_01470
hisP	1518970	1519743		Histidine transport ATP-binding protein HisP	ecl8_01471
ecl8_01472	1519749	1520276	c	hypothetical protein	ecl8_01472
ecl8_01473	1520492	1521385	c	Epimerase family protein	ecl8_01473
folX	1521404	1521766	c	Dihydroneopterin triphosphate 2'-epimerase	ecl8_01474
yfcG_1	1521832	1522461	c	Disulfide-bond oxidoreductase YfcG	ecl8_01475
yfcF	1522642	1523280		Glutathione S-transferase YfcF	ecl8_01476
yfcE	1523343	1523894		Phosphodiesterase YfcE	ecl8_01477
yfcD	1523952	1524503		putative Nudix hydrolase YfcD	ecl8_01478
pta	1524596	1526743	c	Phosphate acetyltransferase	ecl8_01479
ackA	1526944	1528146	c	Acetate kinase	ecl8_01480
ecl8_01481	1528484	1528939		hypothetical protein	ecl8_01481
ecl8_01482	1529027	1529521		hypothetical protein	ecl8_01482
hxpA	1529533	1530192		Hexitol phosphatase A	ecl8_01483
sdcS	1530269	1532101		Sodium-dependent dicarboxylate transporter SdcS	ecl8_01484
yfbR	1532146	1532745	c	5'-deoxynucleotidase YfbR	ecl8_01485
alaA	1532827	1534044	c	Glutamate-pyruvate aminotransferase AlaA	ecl8_01486
cmpR_1	1534917	1535843		HTH-type transcriptional activator CmpR	ecl8_01487
ndhC	1536582	1536941		NAD(P)H-quinone oxidoreductase subunit 3	ecl8_01488
nuoB	1536957	1537631		NADH-quinone oxidoreductase subunit B	ecl8_01489
nuoC	1537718	1539526		NADH-quinone oxidoreductase subunit C/D	ecl8_01490
nuoE	1539529	1540029		NADH-quinone oxidoreductase subunit E	ecl8_01491
nuoF	1540026	1541363		NADH-quinone oxidoreductase subunit F	ecl8_01492
nuoG	1541396	1544122		NADH-quinone oxidoreductase subunit G	ecl8_01493
nuoH	1544119	1545096		NADH-quinone oxidoreductase subunit H	ecl8_01494
nuoI_2	1545111	1545653		NADH-quinone oxidoreductase subunit I	ecl8_01495
nuoJ	1545665	1546219		NADH-quinone oxidoreductase subunit J	ecl8_01496
nuoK	1546216	1546518		NADH-quinone oxidoreductase subunit K	ecl8_01497
nuoL	1546515	1548356		NADH-quinone oxidoreductase subunit L	ecl8_01498
nuoM	1548526	1550055		NADH-quinone oxidoreductase subunit M	ecl8_01499
nuoN	1550062	1551519		NADH-quinone oxidoreductase subunit N	ecl8_01500
rbn_1	1551574	1552494	c	Ribonuclease BN	ecl8_01501
ecl8_01502	1552555	1553013		hypothetical protein	ecl8_01502
menF	1553149	1554438		Isochorismate synthase MenF	ecl8_01503
menD	1554521	1556191		2-succinyl-5-enolpyruvyl-6-hydroxy-3- cyclohexene-1-carboxylate synthase	ecl8_01504
menH	1556188	1556946		2-succinyl-6-hydroxy-2, 4-cyclohexadiene-1-carboxylate synthase	ecl8_01505
menB	1556961	1557818		1,4-dihydroxy-2-naphthoyl-CoA synthase	ecl8_01506
menC	1557818	1558783		o-succinylbenzoate synthase	ecl8_01507
menE	1558780	1560156		2-succinylbenzoate--CoA ligase	ecl8_01508
nudI	1560212	1560637	c	Nucleoside triphosphatase NudI	ecl8_01509
rpnA_2	1560775	1561716		Recombination-promoting nuclease RpnA	ecl8_01510
ecl8_01511	1561990	1562532		hypothetical protein	ecl8_01511
pncC_2	1562635	1563831		Nicotinamide-nucleotide amidohydrolase PncC	ecl8_01512
rhmR	1564036	1564821		putative HTH-type transcriptional regulator RhmR	ecl8_01513
rhmD	1564832	1566037		L-rhamnonate dehydratase	ecl8_01514
rhmT_1	1566077	1567012		Inner membrane transport protein RhmT	ecl8_01515
rhmT_2	1567042	1567368		Inner membrane transport protein RhmT	ecl8_01516
rhmA	1567383	1568186		2-keto-3-deoxy-L-rhamnonate aldolase	ecl8_01517
glpC	1568208	1569386	c	Anaerobic glycerol-3-phosphate dehydrogenase subunit C	ecl8_01518
glpB	1569383	1570642	c	Anaerobic glycerol-3-phosphate dehydrogenase subunit B	ecl8_01519
glpA	1570632	1572254	c	Anaerobic glycerol-3-phosphate dehydrogenase subunit A	ecl8_01520
glpT_1	1572526	1573872		Glycerol-3-phosphate transporter	ecl8_01521
glpQ	1573882	1574952		Glycerophosphodiester phosphodiesterase, periplasmic	ecl8_01522
ascD	1575414	1575668	c	CDP-6-deoxy-L-threo-D-glycero-4-hexulose-3- dehydrase reductase	ecl8_01523
nrdB	1575668	1576798	c	Ribonucleoside-diphosphate reductase 1 subunit beta	ecl8_01524
nrdA	1576900	1579185	c	Ribonucleoside-diphosphate reductase 1 subunit alpha	ecl8_01525
ubiG	1579529	1580257	c	Ubiquinone biosynthesis O-methyltransferase	ecl8_01526
gyrA	1580404	1583040		DNA gyrase subunit A	ecl8_01527
atoB	1583151	1584335	c	Acetyl-CoA acetyltransferase	ecl8_01528
atoE	1584364	1585686	c	Putative short-chain fatty acid transporter	ecl8_01529
atoA	1585683	1586333	c	Acetate CoA-transferase subunit beta	ecl8_01530
atoD	1586333	1586995	c	Acetate CoA-transferase subunit alpha	ecl8_01531
atoC	1587192	1588577	c	Regulatory protein AtoC	ecl8_01532
atoS	1588574	1590514	c	Signal transduction histidine-protein kinase AtoS	ecl8_01533
rcsC	1590570	1593410		Sensor histidine kinase RcsC	ecl8_01534
rcsB	1593456	1594106	c	Transcriptional regulatory protein RcsB	ecl8_01535
rcsD	1594122	1596779	c	Phosphotransferase RcsD	ecl8_01536
ompC	1597551	1598648		Outer membrane protein C	ecl8_01537
apbE_1	1598752	1599804		FAD:protein FMN transferase	ecl8_01538
ada_2	1599878	1600942		Bifunctional transcriptional activator/DNA repair enzyme Ada	ecl8_01539
alkB	1600942	1601595		Alpha-ketoglutarate-dependent dioxygenase AlkB	ecl8_01540
yojI	1601670	1603313		ABC transporter ATP-binding/permease protein YojI	ecl8_01541
ecl8_01542	1603464	1604900		Magnesium transporter MgtE	ecl8_01542
bicA	1604863	1606101	c	Bicarbonate transporter BicA	ecl8_01543
mqo_1	1606383	1608017		Malate:quinone oxidoreductase	ecl8_01544
eco	1608084	1608575	c	Ecotin	ecl8_01545
ecl8_01546	1608750	1609859	c	Putative transport protein	ecl8_01546
ecl8_01547	1610044	1610120	c	tRNA-Pro	ecl8_01547
yejM	1610197	1611957	c	Inner membrane protein YejM	ecl8_01548
ecl8_01549	1611976	1612239	c	hypothetical protein	ecl8_01549
yejK	1612390	1613397		Nucleoid-associated protein YejK	ecl8_01550
glcR_1	1613417	1614178	c	HTH-type transcriptional repressor GlcR	ecl8_01551
nudK_2	1614261	1614857		GDP-mannose pyrophosphatase NudK	ecl8_01552
nylB	1614876	1616162	c	6-aminohexanoate-dimer hydrolase	ecl8_01553
allS_2	1616267	1617154		HTH-type transcriptional activator AllS	ecl8_01554
rplY	1617213	1617497	c	50S ribosomal protein L25	ecl8_01555
radD	1617634	1619388	c	Putative DNA repair helicase RadD	ecl8_01556
rsuA	1619536	1620255		Ribosomal small subunit pseudouridine synthase A	ecl8_01557
bcr_2	1620252	1621448		Bicyclomycin resistance protein	ecl8_01558
yejG	1621780	1622124		putative protein YejG	ecl8_01559
yejF_2	1622128	1623717	c	putative ABC transporter ATP-binding protein YejF	ecl8_01560
yejE	1623719	1624744	c	Inner membrane ABC transporter permease protein YejE	ecl8_01561
yejB	1624744	1625838	c	Inner membrane ABC transporter permease protein YejB	ecl8_01562
appA_2	1625848	1627653	c	Oligopeptide-binding protein AppA	ecl8_01563
pdeN	1627722	1629284	c	putative cyclic di-GMP phosphodiesterase PdeN	ecl8_01564
mepS_1	1629473	1630042	c	Murein DD-endopeptidase MepS/Murein LD-carboxypeptidase	ecl8_01565
lpxT	1630469	1631176	c	Lipid A 1-diphosphate synthase	ecl8_01566
yeiR	1631220	1632197	c	Zinc-binding GTPase YeiR	ecl8_01567
por_1	1632318	1633784	c	Polyol:NADP oxidoreductase	ecl8_01568
uxuA_2	1633992	1635182		Mannonate dehydratase	ecl8_01569
yeiP	1635253	1635825	c	Elongation factor P-like protein	ecl8_01570
ecl8_01571	1636666	1637445		hypothetical protein	ecl8_01571
setB	1637805	1638986	c	Sugar efflux transporter B	ecl8_01572
fruB_1	1639323	1640453		Multiphosphoryl transfer protein	ecl8_01573
lacC	1640454	1641392		Tagatose-6-phosphate kinase	ecl8_01574
fruA_1	1641409	1643103		PTS system fructose-specific EIIB'BC component	ecl8_01575
nfo	1643155	1644009	c	Endonuclease 4	ecl8_01576
ecl8_01577	1644081	1645130	c	hypothetical protein	ecl8_01577
cmpR_2	1645396	1646262		HTH-type transcriptional activator CmpR	ecl8_01578
lysP	1646441	1647910		Lysine-specific permease	ecl8_01579
ecl8_01580	1648033	1648818	c	hypothetical protein	ecl8_01580
ecl8_01581	1648875	1649396	c	hypothetical protein	ecl8_01581
cirA	1649857	1651830		Colicin I receptor	ecl8_01582
yeiG	1651901	1652734	c	S-formylglutathione hydrolase YeiG	ecl8_01583
folE	1653095	1653763		GTP cyclohydrolase 1	ecl8_01584
ecl8_01585	1653779	1654936		hypothetical protein	ecl8_01585
galS	1655092	1656114		HTH-type transcriptional regulator GalS	ecl8_01586
mglB	1656411	1657409		D-galactose-binding periplasmic protein	ecl8_01587
mglA_1	1657528	1659048		Galactose/methyl galactoside import ATP-binding protein MglA	ecl8_01588
mglC	1659064	1660074		Galactoside transport system permease protein MglC	ecl8_01589
ecl8_01590	1660145	1660861	c	hypothetical protein	ecl8_01590
cdd	1661137	1662021	c	Cytidine deaminase	ecl8_01591
yohK_1	1662149	1662844	c	Inner membrane protein YohK	ecl8_01592
ecl8_01593	1662841	1663239	c	hypothetical protein	ecl8_01593
dusC	1663597	1664529		tRNA-dihydrouridine(16) synthase	ecl8_01594
oprB	1664886	1666250		Porin B	ecl8_01595
bglG	1666406	1667239		Cryptic beta-glucoside bgl operon antiterminator	ecl8_01596
bglF_2	1667382	1669244		PTS system beta-glucoside-specific EIIBCA component	ecl8_01597
bglB	1669260	1670654		6-phospho-beta-glucosidase BglB	ecl8_01598
oprM_2	1670926	1672365		Outer membrane protein OprM	ecl8_01599
yohD	1672399	1672968	c	Inner membrane protein YohD	ecl8_01600
yohC	1673123	1673710		Inner membrane protein YohC	ecl8_01601
pbpG	1673899	1674849		D-alanyl-D-alanine endopeptidase	ecl8_01602
pat_2	1675072	1675626	c	Phosphinothricin N-acetyltransferase	ecl8_01603
dld	1675712	1677457	c	Quinone-dependent D-lactate dehydrogenase	ecl8_01604
ecl8_01605	1677652	1679949		Beta-glucosidase BoGH3B	ecl8_01605
yehZ	1680086	1681003		Glycine betaine-binding protein YehZ	ecl8_01606
yehY	1681011	1682168		Glycine betaine uptake system permease protein YehY	ecl8_01607
yehX	1682161	1683108		Glycine betaine uptake system ATP-binding protein YehX	ecl8_01608
yehW	1683092	1683829		Glycine betaine uptake system permease protein YehW	ecl8_01609
ecl8_01610	1683804	1683917	c	hypothetical protein	ecl8_01610
btsS	1684110	1685834		Sensor histidine kinase BtsS	ecl8_01611
btsR	1685828	1686547		Transcriptional regulatory protein BtsR	ecl8_01612
ecl8_01613	1686595	1687065		hypothetical protein	ecl8_01613
metG	1687180	1689222	c	Methionine--tRNA ligase	ecl8_01614
apbC	1689367	1690476		Iron-sulfur cluster carrier protein	ecl8_01615
yafP_1	1690473	1690934	c	putative N-acetyltransferase YafP	ecl8_01616
rcnB_1	1690909	1691226	c	Nickel/cobalt homeostasis protein RcnB	ecl8_01617
dmlR_7	1691410	1692309		HTH-type transcriptional regulator DmlR	ecl8_01618
adeQ	1692299	1693642	c	Adenine permease AdeQ	ecl8_01619
ade2	1693645	1695456	c	Adenine deaminase 2	ecl8_01620
oxyR_1	1695577	1696491		Hydrogen peroxide-inducible genes activator	ecl8_01621
uspA_2	1696488	1696910	c	Universal stress protein A	ecl8_01622
thiM	1697228	1698001		Hydroxyethylthiazole kinase	ecl8_01623
thiD	1697998	1698798		Hydroxymethylpyrimidine/phosphomethylpyrimidine kinase	ecl8_01624
fbaB	1698946	1699998		Fructose-bisphosphate aldolase class 1	ecl8_01625
csbX_1	1700057	1701340	c	Alpha-ketoglutarate permease	ecl8_01626
araB_1	1701422	1703029	c	Ribulokinase	ecl8_01627
rbtD	1703056	1703805	c	Ribitol 2-dehydrogenase	ecl8_01628
degA	1704060	1705061		HTH-type transcriptional regulator DegA	ecl8_01629
lsrR_2	1705084	1706025	c	Transcriptional regulator LsrR	ecl8_01630
mtlK	1706232	1707599		Mannitol 2-dehydrogenase	ecl8_01631
xylB_2	1707609	1708400		Xylulose kinase	ecl8_01632
xylB_3	1708397	1709068		Xylulose kinase	ecl8_01633
csbX_2	1709139	1710416		Alpha-ketoglutarate permease	ecl8_01634
hxpB_1	1710465	1711127		Hexitol phosphatase B	ecl8_01635
gci	1711425	1712579		D-galactarolactone cycloisomerase	ecl8_01636
ddpA_1	1712699	1714321		putative D,D-dipeptide-binding periplasmic protein DdpA	ecl8_01637
ddpB	1714318	1715355		putative D,D-dipeptide transport system permease protein DdpB	ecl8_01638
ddpC_2	1715352	1716257		putative D,D-dipeptide transport system permease protein DdpC	ecl8_01639
oppD_2	1716229	1717092		Oligopeptide transport ATP-binding protein OppD	ecl8_01640
oppF_2	1717103	1717876		Oligopeptide transport ATP-binding protein OppF	ecl8_01641
yegS	1718119	1719015	c	putative lipid kinase YegS	ecl8_01642
ydcP_1	1719258	1720619	c	putative protease YdcP	ecl8_01643
baeR	1720938	1721660	c	Transcriptional regulatory protein BaeR	ecl8_01644
baeS	1721657	1723135	c	Signal transduction histidine-protein kinase BaeS	ecl8_01645
mdtD	1723132	1724547	c	Putative multidrug resistance protein MdtD	ecl8_01646
mdtC	1724549	1727626	c	Multidrug resistance protein MdtC	ecl8_01647
mdtB	1727627	1730749	c	Multidrug resistance protein MdtB	ecl8_01648
mdtA_1	1730749	1731987	c	Multidrug resistance protein MdtA	ecl8_01649
dctA_2	1732288	1733562		C4-dicarboxylate transport protein	ecl8_01650
ecl8_01651	1733835	1734446	c	hypothetical protein	ecl8_01651
ecl8_01652	1734562	1734702	c	hypothetical protein	ecl8_01652
phoP_1	1734940	1735641	c	Virulence transcriptional regulatory protein PhoP	ecl8_01653
walK	1735656	1737512	c	Sensor histidine kinase WalK	ecl8_01654
dnaK_1	1737801	1739153	c	Chaperone protein DnaK	ecl8_01655
alkA	1739291	1740139		DNA-3-methyladenine glycosylase 2	ecl8_01656
udk	1740254	1740895		Uridine kinase	ecl8_01657
dcd	1740986	1741567		dCTP deaminase	ecl8_01658
ecl8_01659	1741598	1743445		hypothetical protein	ecl8_01659
ecl8_01660	1743784	1745367	c	hypothetical protein	ecl8_01660
galF	1746126	1747022		UTP--glucose-1-phosphate uridylyltransferase	ecl8_01661
ecl8_01662	1747415	1748044		hypothetical protein	ecl8_01662
ecl8_01663	1749006	1750439		hypothetical protein	ecl8_01663
ecl8_01664	1750585	1751721		hypothetical protein	ecl8_01664
ecl8_01665	1752176	1754344		Putative tyrosine-protein kinase in cps region	ecl8_01665
kanF	1754404	1755480		2-deoxystreptamine glucosyltransferase	ecl8_01666
ecl8_01667	1755510	1756631		hypothetical protein	ecl8_01667
ecl8_01668	1756637	1757803		hypothetical protein	ecl8_01668
ecl8_01669	1757760	1759049		hypothetical protein	ecl8_01669
wzxC	1759067	1760524		Lipopolysaccharide biosynthesis protein WzxC	ecl8_01670
ecl8_01671	1760555	1762294		hypothetical protein	ecl8_01671
oatWY	1762319	1762987		Polysialic acid O-acetyltransferase	ecl8_01672
wcaJ	1763065	1764462		UDP-glucose:undecaprenyl-phosphate glucose-1-phosphate transferase	ecl8_01673
gnd	1764626	1766032		6-phosphogluconate dehydrogenase, decarboxylating	ecl8_01674
manC1	1766275	1767690		Mannose-1-phosphate guanylyltransferase 1	ecl8_01675
algC	1767713	1769083		Phosphomannomutase/phosphoglucomutase	ecl8_01676
ugd	1769247	1770413		UDP-glucose 6-dehydrogenase	ecl8_01677
wbgU	1771357	1772361	c	UDP-N-acetylglucosamine 4-epimerase	ecl8_01678
tagG	1773408	1774175		Teichoic acid translocation permease protein TagG	ecl8_01679
tagH	1774175	1774915		Teichoic acids export ATP-binding protein TagH	ecl8_01680
gspA	1774931	1776826		General stress protein A	ecl8_01681
rfbD	1776842	1777996		UDP-galactopyranose mutase	ecl8_01682
ecl8_01683	1777993	1778886		hypothetical protein	ecl8_01683
pglA	1778899	1780029		N, N'-diacetylbacillosaminyl-diphospho-undecaprenol alpha-1,3-N-acetylgalactosaminyltransferase	ecl8_01684
epsJ_3	1780125	1781333		putative glycosyltransferase EpsJ	ecl8_01685
ecl8_01686	1781403	1782863	c	hypothetical protein	ecl8_01686
ykoT	1782865	1783845	c	putative glycosyltransferase YkoT	ecl8_01687
ecl8_01688	1783842	1784219	c	hypothetical protein	ecl8_01688
hisI_1	1784412	1785011	c	Phosphoribosyl-AMP cyclohydrolase	ecl8_01689
hisF	1785005	1785781	c	Imidazole glycerol phosphate synthase subunit HisF	ecl8_01690
hisA	1785763	1786500	c	1-(5-phosphoribosyl)-5-[(5- phosphoribosylamino)methylideneamino] imidazole-4-carboxamide isomerase	ecl8_01691
hisH	1786500	1787090	c	Imidazole glycerol phosphate synthase subunit HisH	ecl8_01692
hisB	1787090	1788157	c	Histidine biosynthesis bifunctional protein HisB	ecl8_01693
hisC	1788154	1789215	c	Histidinol-phosphate aminotransferase	ecl8_01694
hisD	1789212	1790516	c	Histidinol dehydrogenase	ecl8_01695
hisG	1790556	1791455	c	ATP phosphoribosyltransferase	ecl8_01696
yeeZ	1791828	1792652		Protein YeeZ	ecl8_01697
yhaJ_2	1792691	1793104		HTH-type transcriptional regulator YhaJ	ecl8_01698
plaP	1793867	1795225		Low-affinity putrescine importer PlaP	ecl8_01699
ecl8_01700	1795408	1795719	c	hypothetical protein	ecl8_01700
fusA_2	1795959	1798061		Elongation factor G	ecl8_01701
sbcB	1798284	1799708	c	Exodeoxyribonuclease I	ecl8_01702
dacD	1799889	1801052		D-alanyl-D-alanine carboxypeptidase DacD	ecl8_01703
sbmC	1801229	1801702		DNA gyrase inhibitor	ecl8_01704
yeeA	1801801	1802859		Inner membrane protein YeeA	ecl8_01705
ecl8_01706	1803027	1803350		hypothetical protein	ecl8_01706
cobS	1803665	1804405		Adenosylcobinamide-GDP ribazoletransferase	ecl8_01707
cobT_2	1804433	1805098		Nicotinate-nucleotide--dimethylbenzimidazole phosphoribosyltransferase	ecl8_01708
cobT_3	1805169	1805501		Nicotinate-nucleotide--dimethylbenzimidazole phosphoribosyltransferase	ecl8_01709
ahcY	1805544	1806653	c	Adenosylhomocysteinase	ecl8_01710
ecl8_01711	1806852	1807583		hypothetical protein	ecl8_01711
ecl8_01712	1807605	1807994	c	hypothetical protein	ecl8_01712
dmlR_8	1808110	1809066		HTH-type transcriptional regulator DmlR	ecl8_01713
ecl8_01714	1809026	1809766	c	hypothetical protein	ecl8_01714
yhjE_2	1809813	1811132	c	Inner membrane metabolite transport protein YhjE	ecl8_01715
ecl8_01716	1811557	1811757		hypothetical protein	ecl8_01716
ecl8_01717	1811794	1812717	c	hypothetical protein	ecl8_01717
ecl8_01718	1812742	1813002		hypothetical protein	ecl8_01718
ecl8_01719	1813136	1814923		putative signaling protein	ecl8_01719
yeaR_1	1815146	1815478		putative protein YeaR	ecl8_01720
yoaG	1815485	1815820		Protein YoaG	ecl8_01721
gcvA_2	1815826	1816740	c	Glycine cleavage system transcriptional activator	ecl8_01722
ecl8_01723	1816872	1817447		hypothetical protein	ecl8_01723
cpo	1817640	1818476		Non-heme chloroperoxidase	ecl8_01724
dgcP_1	1818683	1819654		Diguanylate cyclase DgcP	ecl8_01725
ecl8_01726	1819651	1820754	c	hypothetical protein	ecl8_01726
ecl8_01727	1821220	1822050	c	hypothetical protein	ecl8_01727
ecl8_01728	1822077	1822202	c	hypothetical protein	ecl8_01728
nimR_2	1822680	1823486	c	HTH-type transcriptional regulator NimR	ecl8_01729
aaeB_2	1823626	1825602		p-hydroxybenzoic acid efflux pump subunit AaeB	ecl8_01730
ecl8_01731	1825592	1825807		hypothetical protein	ecl8_01731
aaeA_2	1825804	1826667		p-hydroxybenzoic acid efflux pump subunit AaeA	ecl8_01732
ecl8_01733	1827396	1828016	c	hypothetical protein	ecl8_01733
ecl8_01734	1828259	1828624	c	hypothetical protein	ecl8_01734
ecl8_01735	1829044	1829733	c	hypothetical protein	ecl8_01735
fabG_4	1830196	1831002	c	3-oxoacyl-[acyl-carrier-protein] reductase FabG	ecl8_01736
ecl8_01737	1831175	1832362		putative transporter	ecl8_01737
ecl8_01738	1832339	1835113	c	Putative HTH-type transcriptional regulator	ecl8_01738
mdtJ_1	1835349	1836113	c	Spermidine export protein MdtJ	ecl8_01739
ecl8_01740	1837167	1838063		Putative 2-dehydropantoate 2-reductase	ecl8_01740
ecl8_01741	1838603	1838950	c	hypothetical protein	ecl8_01741
intA_5	1838947	1840215	c	Prophage integrase IntA	ecl8_01742
ecl8_01743	1840377	1840452	c	tRNA-Asn	ecl8_01743
yeeO	1840645	1842081		putative FMN/FAD exporter YeeO	ecl8_01744
ecl8_01745	1842210	1842285		tRNA-Asn	ecl8_01745
amn	1842447	1843901	c	AMP nucleosidase	ecl8_01746
pmrD	1844031	1844276	c	Signal transduction protein PmrD	ecl8_01747
ecl8_01748	1844549	1846171		Thermostable monoacylglycerol lipase	ecl8_01748
ecl8_01749	1846082	1847014	c	hypothetical protein	ecl8_01749
acuI	1847134	1848111	c	putative acrylyl-CoA reductase AcuI	ecl8_01750
acuR	1848108	1848812	c	Transcriptional regulator AcuR	ecl8_01751
nhaK_1	1849403	1851037		Sodium, potassium, lithium and rubidium/H(+) antiporter	ecl8_01752
ecl8_01753	1851131	1851206	c	tRNA-Asn	ecl8_01753
oxyR_2	1851537	1852454		Hydrogen peroxide-inducible genes activator	ecl8_01754
cbl_2	1852561	1853511		HTH-type transcriptional regulator cbl	ecl8_01755
erfK	1853590	1854531		putative L,D-transpeptidase ErfK/SrfK	ecl8_01756
pgrR_3	1854909	1855604	c	HTH-type transcriptional regulator PgrR	ecl8_01757
ecl8_01758	1856014	1856089	c	tRNA-Asn	ecl8_01758
mtfA	1856190	1856987	c	Protein MtfA	ecl8_01759
ecl8_01760	1857081	1857170		tRNA-Ser	ecl8_01760
ompN_1	1857443	1858588	c	Outer membrane protein N	ecl8_01761
yedR	1859127	1859408		Inner membrane protein YedR	ecl8_01762
yedJ	1859451	1860158		putative protein YedJ	ecl8_01763
dcm	1860235	1861635		DNA-cytosine methyltransferase	ecl8_01764
vsr	1861613	1862110		Very short patch repair protein	ecl8_01765
yedA_1	1862085	1862996	c	putative inner membrane transporter YedA	ecl8_01766
yedI	1863180	1864091		Inner membrane protein YedI	ecl8_01767
dgcQ	1864207	1865886		putative diguanylate cyclase DgcQ	ecl8_01768
ecl8_01769	1866186	1866410	c	hypothetical protein	ecl8_01769
dsrB	1866541	1866732		Protein DsrB	ecl8_01770
rcsA_1	1866765	1867388	c	Transcriptional regulatory protein RcsA	ecl8_01771
ecl8_01772	1867764	1868195		hypothetical protein	ecl8_01772
amyA	1868237	1869724	c	Cytoplasmic alpha-amylase	ecl8_01773
fliY_1	1869958	1870725		L-cystine-binding protein FliY	ecl8_01774
dcyD	1870821	1871807		D-cysteine desulfhydrase	ecl8_01775
yecS_1	1871823	1872491		L-cystine transport system permease protein YecS	ecl8_01776
artM_1	1872488	1873240		Arginine transport ATP-binding protein ArtM	ecl8_01777
sdiA	1873558	1874280		Regulatory protein SdiA	ecl8_01778
ecl8_01779	1874348	1874572	c	hypothetical protein	ecl8_01779
uvrY	1875034	1875690		Response regulator UvrY	ecl8_01780
uvrC	1875687	1877519		UvrABC system protein C	ecl8_01781
pgsA	1877577	1878125		CDP-diacylglycerol--glycerol-3-phosphate 3-phosphatidyltransferase	ecl8_01782
ecl8_01783	1878276	1878351		tRNA-Gly	ecl8_01783
ecl8_01784	1878392	1878465		tRNA-Cys	ecl8_01784
ecl8_01785	1878479	1878565		tRNA-Leu	ecl8_01785
dapA_2	1878793	1879674		4-hydroxy-tetrahydrodipicolinate synthase	ecl8_01786
secA_1	1879773	1880441		Protein translocase subunit SecA	ecl8_01787
tyrP_2	1880466	1881608	c	Tyrosine-specific transport protein	ecl8_01788
ecl8_01789	1881869	1882108		hypothetical protein	ecl8_01789
ftnA_1	1882144	1882641	c	Bacterial non-heme ferritin	ecl8_01790
ecl8_01791	1883050	1883688		hypothetical protein	ecl8_01791
hsrA_2	1883723	1885147	c	putative transport protein HsrA	ecl8_01792
ecl8_01793	1885298	1885549		hypothetical protein	ecl8_01793
yagG_1	1885587	1887149	c	Putative glycoside/cation symporter YagG	ecl8_01794
ftnA_2	1887393	1887902	c	Bacterial non-heme ferritin	ecl8_01795
araF	1888794	1889774		L-arabinose-binding periplasmic protein	ecl8_01796
araG	1889837	1891351		Arabinose import ATP-binding protein AraG	ecl8_01797
rbsC_1	1891366	1892346		Ribose import permease protein RbsC	ecl8_01798
otsB	1892508	1893296		Trehalose-6-phosphate phosphatase	ecl8_01799
otsA	1893271	1894695		Trehalose-6-phosphate synthase	ecl8_01800
uspC	1894719	1895147	c	Universal stress protein C	ecl8_01801
yagG_2	1895500	1897083		Putative glycoside/cation symporter YagG	ecl8_01802
yesR	1897088	1898227		Unsaturated rhamnogalacturonyl hydrolase YesR	ecl8_01803
argS	1898289	1900022	c	Arginine--tRNA ligase	ecl8_01804
yecM	1900258	1900827		Protein YecM	ecl8_01805
cutC_1	1900904	1901647		Copper homeostasis protein CutC	ecl8_01806
cmoB	1901729	1902733	c	tRNA U34 carboxymethyltransferase	ecl8_01807
cmoA	1902730	1903473	c	Carboxy-S-adenosyl-L-methionine synthase	ecl8_01808
yecN	1903513	1903908	c	Inner membrane protein YecN	ecl8_01809
ecl8_01810	1903961	1904779	c	hypothetical protein	ecl8_01810
yecD	1904776	1905342	c	Isochorismatase family protein YecD	ecl8_01811
aspS	1905610	1907397		Aspartate--tRNA ligase	ecl8_01812
nudB	1907399	1907842		Dihydroneopterin triphosphate diphosphatase	ecl8_01813
yebC	1907870	1908610		putative transcriptional regulatory protein YebC	ecl8_01814
ruvC	1908645	1909166		Crossover junction endodeoxyribonuclease RuvC	ecl8_01815
ruvA	1909246	1909857		Holliday junction ATP-dependent DNA helicase RuvA	ecl8_01816
ruvB	1909866	1910876		Holliday junction ATP-dependent DNA helicase RuvB	ecl8_01817
znuB	1910940	1911725	c	High-affinity zinc uptake system membrane protein ZnuB	ecl8_01818
znuC	1911725	1912477	c	Zinc import ATP-binding protein ZnuC	ecl8_01819
znuA	1912556	1913500		High-affinity zinc uptake system protein ZnuA	ecl8_01820
mepM_1	1913516	1914835		Murein DD-endopeptidase MepM	ecl8_01821
lpxM	1914953	1915927		Lipid A biosynthesis myristoyltransferase	ecl8_01822
pykA	1915968	1917410	c	Pyruvate kinase II	ecl8_01823
hexR_1	1917536	1918423	c	HTH-type transcriptional regulator HexR	ecl8_01824
zwf	1918761	1920236		Glucose-6-phosphate 1-dehydrogenase	ecl8_01825
edd	1920459	1922270		Phosphogluconate dehydratase	ecl8_01826
eda	1922309	1922950		KHG/KDPG aldolase	ecl8_01827
purT	1923007	1924185	c	Formate-dependent phosphoribosylglycinamide formyltransferase	ecl8_01828
ecl8_01829	1924330	1924677		hypothetical protein	ecl8_01829
yebE	1924817	1925476		Inner membrane protein YebE	ecl8_01830
ptrB	1925630	1927657		Protease 2	ecl8_01831
exoX	1927661	1928320	c	Exodeoxyribonuclease 10	ecl8_01832
holE	1928399	1928629	c	DNA polymerase III subunit theta	ecl8_01833
yobA	1928742	1929116		Protein YobA	ecl8_01834
yebZ	1929120	1929989		Inner membrane protein YebZ	ecl8_01835
ecl8_01836	1930006	1930344		hypothetical protein	ecl8_01836
ecl8_01837	1930647	1930838	c	hypothetical protein	ecl8_01837
ecl8_01838	1931228	1932238	c	hypothetical protein	ecl8_01838
pphA	1932353	1933006		Serine/threonine-protein phosphatase 1	ecl8_01839
ecl8_01840	1933003	1933194	c	hypothetical protein	ecl8_01840
yebV	1933292	1933531	c	putative protein YebV	ecl8_01841
rsmF	1933647	1935035	c	Ribosomal RNA small subunit methyltransferase F	ecl8_01842
ecl8_01843	1935203	1937836	c	hypothetical protein	ecl8_01843
yebS	1937805	1939088	c	Inner membrane protein YebS	ecl8_01844
msrC	1939164	1939718		Free methionine-R-sulfoxide reductase	ecl8_01845
proQ	1939816	1940493		RNA chaperone ProQ	ecl8_01846
prc	1940513	1942561		Tail-specific protease	ecl8_01847
htpX	1942797	1943681		Protease HtpX	ecl8_01848
ribZ_2	1943747	1945117	c	Riboflavin transporter RibZ	ecl8_01849
kdgR_2	1945295	1946086		Transcriptional regulator KdgR	ecl8_01850
ecl8_01851	1946143	1946382	c	hypothetical protein	ecl8_01851
ecl8_01852	1946760	1947050		hypothetical protein	ecl8_01852
cspC	1947798	1948007		Cold shock-like protein CspC	ecl8_01853
ftsI_1	1948198	1949943		Peptidoglycan D,D-transpeptidase FtsI	ecl8_01854
rlmA	1950005	1950799		23S rRNA (guanine(745)-N(1))-methyltransferase	ecl8_01855
mntP	1950803	1951369	c	putative manganese efflux pump MntP	ecl8_01856
ecl8_01857	1951788	1952246	c	hypothetical protein	ecl8_01857
manZ_1	1952309	1953160	c	PTS system mannose-specific EIID component	ecl8_01858
manY	1953173	1953973	c	PTS system mannose-specific EIIC component	ecl8_01859
manX_1	1954030	1955001	c	PTS system mannose-specific EIIAB component	ecl8_01860
ecl8_01861	1955448	1957007		hypothetical protein	ecl8_01861
pdeD	1957041	1958618	c	putative cyclic di-GMP phosphodiesterase PdeD	ecl8_01862
sdaA	1958801	1960165	c	L-serine dehydratase 1	ecl8_01863
nudL	1960328	1960906	c	putative Nudix hydrolase NudL	ecl8_01864
pabB	1960910	1962265	c	Aminodeoxychorismate synthase component 1	ecl8_01865
ecl8_01866	1962354	1962539		hypothetical protein	ecl8_01866
yabJ_1	1962540	1962884	c	2-iminobutanoate/2-iminopropanoate deaminase	ecl8_01867
dinG_1	1963016	1964926		putative ATP-dependent helicase DinG	ecl8_01868
tsaB	1965072	1965767		tRNA threonylcarbamoyladenosine biosynthesis protein TsaB	ecl8_01869
slp	1965806	1966387		Outer membrane protein slp	ecl8_01870
fadD	1966560	1968278		Long-chain-fatty-acid--CoA ligase	ecl8_01871
rnd	1968360	1969475		Ribonuclease D	ecl8_01872
minE	1969553	1969822	c	Cell division topological specificity factor	ecl8_01873
minD	1969826	1970638	c	Septum site-determining protein MinD	ecl8_01874
minC	1970662	1971360	c	Septum site-determining protein MinC	ecl8_01875
ycgL	1971487	1971768		Protein YcgL	ecl8_01876
ycgM	1971785	1972444		putative protein YcgM	ecl8_01877
ecl8_01878	1972539	1972985		hypothetical protein	ecl8_01878
yeaR_2	1972992	1973336	c	putative protein YeaR	ecl8_01879
dsbB	1973488	1974018	c	Disulfide bond formation protein B	ecl8_01880
nhaB	1974147	1975697	c	Na(+)/H(+) antiporter NhaB	ecl8_01881
fadR_1	1975946	1976665		Fatty acid metabolism regulator protein	ecl8_01882
ecl8_01883	1976740	1978272	c	hypothetical protein	ecl8_01883
dadA_1	1978594	1979892		D-amino acid dehydrogenase	ecl8_01884
dadX	1979902	1980972		Alanine racemase, catabolic	ecl8_01885
cvrA	1980989	1982722	c	K(+)/H(+) antiporter NhaP2	ecl8_01886
ldcA	1982815	1983729	c	Murein tetrapeptide carboxypeptidase	ecl8_01887
emtA	1983905	1984516		Endo-type membrane-bound lytic murein transglycosylase A	ecl8_01888
fhuA_1	1984558	1986678	c	Ferrichrome outer membrane transporter/phage receptor	ecl8_01889
treA	1986930	1988675	c	Periplasmic trehalase	ecl8_01890
ecl8_01891	1989060	1990499		hypothetical protein	ecl8_01891
ecl8_01892	1990493	1991422		hypothetical protein	ecl8_01892
ecl8_01893	1991419	1992234		hypothetical protein	ecl8_01893
ecl8_01894	1992251	1992994		hypothetical protein	ecl8_01894
ecl8_01895	1993316	1994101	c	hypothetical protein	ecl8_01895
ecl8_01896	1994158	1994679	c	hypothetical protein	ecl8_01896
ecl8_01897	1994887	1995900		hypothetical protein	ecl8_01897
ecl8_01898	1995893	1996693		hypothetical protein	ecl8_01898
tsaR_2	1997471	1998412		HTH-type transcriptional regulator TsaR	ecl8_01899
tdcB	1998506	1999495		L-threonine dehydratase catabolic TdcB	ecl8_01900
tdcC	1999521	2000852		Threonine/serine transporter TdcC	ecl8_01901
tdcD	2000880	2002088		Propionate kinase	ecl8_01902
tdcE	2002117	2004411		PFL-like enzyme TdcE	ecl8_01903
livJ_2	2004892	2005956		Leu/Ile/Val/Thr-binding protein	ecl8_01904
livH_2	2006066	2006980		High-affinity branched-chain amino acid transport system permease protein LivH	ecl8_01905
livH_3	2006990	2008276		High-affinity branched-chain amino acid transport system permease protein LivH	ecl8_01906
glnQ_1	2008273	2009148		Glutamine transport ATP-binding protein GlnQ	ecl8_01907
livF_2	2009145	2009864		High-affinity branched-chain amino acid transport ATP-binding protein LivF	ecl8_01908
yjiE	2009870	2010763	c	HTH-type transcriptional regulator YjiE	ecl8_01909
pckA_2	2011047	2012690		Phosphoenolpyruvate carboxykinase (ATP)	ecl8_01910
bltD	2012740	2013216	c	Spermine/spermidine acetyltransferase	ecl8_01911
pcpR_1	2013315	2014241		PCP degradation transcriptional activation protein	ecl8_01912
kgtP_2	2014545	2015840		Alpha-ketoglutarate permease	ecl8_01913
ais	2015855	2016661		Aconitate isomerase	ecl8_01914
cynR_3	2016636	2017535	c	HTH-type transcriptional regulator CynR	ecl8_01915
ecl8_01916	2017645	2018127	c	hypothetical protein	ecl8_01916
rluA_1	2018318	2019016		Ribosomal large subunit pseudouridine synthase A	ecl8_01917
ecl8_01918	2019042	2019581	c	hypothetical protein	ecl8_01918
ecl8_01919	2019696	2020025	c	hypothetical protein	ecl8_01919
ecl8_01920	2020593	2021933		hypothetical protein	ecl8_01920
ecl8_01921	2021930	2022583		hypothetical protein	ecl8_01921
oprF_1	2022587	2024284		Outer membrane porin F	ecl8_01922
vgrG1_1	2024746	2027373		Actin cross-linking toxin VgrG1	ecl8_01923
safA	2027376	2029403		SpoIVD-associated factor A	ecl8_01924
ecl8_01925	2029535	2030314		hypothetical protein	ecl8_01925
ecl8_01926	2031502	2032713		hypothetical protein	ecl8_01926
ecl8_01927	2032728	2036144		hypothetical protein	ecl8_01927
ecl8_01928	2036278	2038041		hypothetical protein	ecl8_01928
ecl8_01929	2038041	2039087		hypothetical protein	ecl8_01929
ecl8_01930	2039068	2039604		hypothetical protein	ecl8_01930
ecl8_01931	2039607	2040050		hypothetical protein	ecl8_01931
ecl8_01932	2040070	2041485		hypothetical protein	ecl8_01932
thpA_1	2041617	2042531		D-threitol-binding protein	ecl8_01933
ecl8_01934	2042615	2042944		hypothetical protein	ecl8_01934
ychF	2043027	2044118	c	Ribosome-binding ATPase YchF	ecl8_01935
pth	2044236	2044820	c	Peptidyl-tRNA hydrolase	ecl8_01936
ecl8_01937	2045093	2045368		hypothetical protein	ecl8_01937
nolA	2045589	2046635		Nodulation protein NolA	ecl8_01938
dauA_1	2046636	2048288	c	C4-dicarboxylic acid transporter DauA	ecl8_01939
prs	2048440	2049387	c	Ribose-phosphate pyrophosphokinase	ecl8_01940
ispE	2049571	2050422	c	4-diphosphocytidyl-2-C-methyl-D-erythritol kinase	ecl8_01941
lolB	2050419	2051030	c	Outer-membrane lipoprotein LolB	ecl8_01942
hemA	2051301	2052557		Glutamyl-tRNA reductase	ecl8_01943
prfA	2052600	2053682		Peptide chain release factor RF1	ecl8_01944
prmC	2053682	2054530		Release factor glutamine methyltransferase	ecl8_01945
ychQ	2054530	2054922		Protein YchQ	ecl8_01946
ecl8_01947	2054926	2055738		hypothetical protein	ecl8_01947
kdsA	2055778	2056632		2-dehydro-3-deoxyphosphooctonate aldolase	ecl8_01948
chaA	2056719	2057819	c	Sodium-potassium/proton antiporter ChaA	ecl8_01949
chaB	2058083	2058313		Putative cation transport regulator ChaB	ecl8_01950
chaC	2058450	2059130		Glutathione-specific gamma-glutamylcyclotransferase	ecl8_01951
ecl8_01952	2059348	2059590	c	hypothetical protein	ecl8_01952
ychN	2059828	2060181	c	Protein YchN	ecl8_01953
nasR	2060249	2061430		Nitrate regulatory protein	ecl8_01954
nrtA	2061673	2062929		Nitrate transport protein NrtA	ecl8_01955
cmpB	2062931	2063815		Bicarbonate transport system permease protein CmpB	ecl8_01956
cmpC_1	2063825	2064613		Bicarbonate transport ATP-binding protein CmpC	ecl8_01957
nasD_2	2064624	2068691		Nitrite reductase [NAD(P)H]	ecl8_01958
nasA_1	2068691	2070154		Nitrate reductase	ecl8_01959
nasA_2	2070102	2070974		Nitrate reductase	ecl8_01960
nasA_3	2070974	2071288		Nitrate reductase	ecl8_01961
ecl8_01962	2071440	2072822		Invasin	ecl8_01962
narL	2072819	2073469	c	Nitrate/nitrite response regulator protein NarL	ecl8_01963
narX	2073480	2075258	c	Nitrate/nitrite sensor protein NarX	ecl8_01964
narK	2075570	2076958		Nitrate/nitrite transporter NarK	ecl8_01965
narG	2077364	2081107		Respiratory nitrate reductase 1 alpha chain	ecl8_01966
narH	2081104	2082639		Respiratory nitrate reductase 1 beta chain	ecl8_01967
narJ	2082636	2083346		Nitrate reductase molybdenum cofactor assembly chaperone NarJ	ecl8_01968
narI	2083346	2084023		Respiratory nitrate reductase 1 gamma chain	ecl8_01969
ecl8_01970	2084020	2084916	c	hypothetical protein	ecl8_01970
lrpC	2085024	2085467		HTH-type transcriptional regulator LrpC	ecl8_01971
ecl8_01972	2086108	2086192	c	tRNA-Tyr	ecl8_01972
ecl8_01973	2086397	2086481	c	tRNA-Tyr	ecl8_01973
purU	2086641	2087483	c	Formyltetrahydrofolate deformylase	ecl8_01974
ecl8_01975	2087526	2087984	c	hypothetical protein	ecl8_01975
ecl8_01976	2088097	2088999		putative NTE family protein	ecl8_01976
rssB	2089089	2090102		Regulator of RpoS	ecl8_01977
galU	2090300	2091202		UTP--glucose-1-phosphate uridylyltransferase	ecl8_01978
hns_1	2091321	2091728	c	DNA-binding protein H-NS	ecl8_01979
tdk	2092380	2092907		Thymidine kinase	ecl8_01980
adhE_4	2093055	2095730	c	Aldehyde-alcohol dehydrogenase	ecl8_01981
ecl8_01982	2096207	2096854		hypothetical protein	ecl8_01982
oppA_1	2097592	2099226		Periplasmic oligopeptide-binding protein	ecl8_01983
oppB	2099312	2100232		Oligopeptide transport system permease protein OppB	ecl8_01984
oppC	2100247	2101155		Oligopeptide transport system permease protein OppC	ecl8_01985
oppD_3	2101167	2102180		Oligopeptide transport ATP-binding protein OppD	ecl8_01986
oppF_3	2102177	2103181		Oligopeptide transport ATP-binding protein OppF	ecl8_01987
ecl8_01988	2103229	2104062		Cyclic nucleotide-gated potassium channel	ecl8_01988
ecl8_01989	2104126	2104455	c	hypothetical protein	ecl8_01989
clsA	2104490	2105950	c	Cardiolipin synthase A	ecl8_01990
ecl8_01991	2106061	2106267		hypothetical protein	ecl8_01991
yceI	2106753	2107400	c	Protein YceI	ecl8_01992
yciI	2108082	2108378	c	Protein YciI	ecl8_01993
ecl8_01994	2108761	2108982		hypothetical protein	ecl8_01994
ecl8_01995	2108994	2109221	c	hypothetical protein	ecl8_01995
ecl8_01996	2109218	2109403	c	hypothetical protein	ecl8_01996
ecl8_01997	2109400	2109738	c	hypothetical protein	ecl8_01997
ecl8_01998	2109731	2110252	c	hypothetical protein	ecl8_01998
ecl8_01999	2111251	2111613	c	hypothetical protein	ecl8_01999
[truncated: 3,075 more rows]
