# Supplementary material for: Transposon mutagenesis screen in Klebsiella pneumoniae identifies genetic determinants required for growth in human urine and serum
Source: eLife. 2024 Aug 27;12:RP88971. doi: 10.7554/eLife.88971 (PMC11349299; doi:10.7554/eLife.88971)
Supplement: Figure 3—source data 1. [file elife-88971-fig3-data1.xlsx]

## Sheet: Essential Genes of Kp
Figure 3-source data 1: Essential Gene Comparisons against ECL8 vs KPNIH1, RH201207, ATCC 43816
ECL8 Essential Genes				KPNIH1 Essential Genes				RH201207 Essential Genes				43816 Essential Genes
Locus_tag	Gene_name	Essential		Locus_tag	Gene_name	Essential		Locus_tag	Gene_name	Essential		Locus_tag	Gene_name	Essential
ecl8_00001	dnaA	TRUE		KPNIH1_00105	KPNIH1_00105	TRUE		KPNRH_00001	dnaA_1	essential		VK055_RS27660	VK055_RS27660	essential
ecl8_00002	dnaN	TRUE		KPNIH1_00425	KPNIH1_00425	TRUE		KPNRH_00002	KPNRH_00002	essential		VK055_RS26440	VK055_RS26440	essential
ecl8_00004	gyrB	TRUE		KPNIH1_00830	dapF	TRUE		KPNRH_00003	dnaN	essential		VK055_RS00010	VK055_RS00010	essential
ecl8_00115	gmk	TRUE		KPNIH1_00935	ubiE	TRUE		KPNRH_00005	gyrB	essential		VK055_RS26445	VK055_RS26445	essential
ecl8_00130	dut	TRUE		KPNIH1_01090	KPNIH1_01090	TRUE		KPNRH_00117	gmk	essential		VK055_RS00015	VK055_RS00015	essential
ecl8_00131	coaBC	TRUE		KPNIH1_01180	hemE	TRUE		KPNRH_00131	dut	essential		VK055_RS00020	VK055_RS00020	essential
ecl8_00133	rpmB	TRUE		KPNIH1_01475	pspG	TRUE		KPNRH_00132	coaBC	essential		VK055_RS00025	VK055_RS00025	essential
ecl8_00134	rpmG	TRUE		KPNIH1_02290	rpsF	TRUE		KPNRH_00134	rpmB	essential		VK055_RS00030	VK055_RS00030	essential
ecl8_00136	coaD	TRUE		KPNIH1_02295	KPNIH1_02295	TRUE		KPNRH_00135	rpmG	essential		VK055_RS00035	VK055_RS00035	essential
ecl8_00138	waaA	TRUE		KPNIH1_02650	KPNIH1_02650	TRUE		KPNRH_00137	coaD	essential		VK055_RS26450	VK055_RS26450	essential
ecl8_00148	rfaF	TRUE		KPNIH1_03405	KPNIH1_03405	TRUE		KPNRH_00138	KPNRH_00138	essential		VK055_RS00160	pgsA	essential
ecl8_00149	hldD	TRUE		KPNIH1_03485	KPNIH1_03485	TRUE		KPNRH_00139	waaA	essential		VK055_RS00165	VK055_RS00165	essential
ecl8_00160	cysE	TRUE		KPNIH1_03715	rpsT	TRUE		KPNRH_00141	pglJ	essential		VK055_RS00170	VK055_RS00170	essential
ecl8_00189	glyQ	TRUE		KPNIH1_04815	KPNIH1_04815	TRUE		KPNRH_00142	rfaG	essential		VK055_RS00175	VK055_RS00175	essential
ecl8_00190	glyS	TRUE		KPNIH1_04845	gmhA	TRUE		KPNRH_00148	rfaC	essential		VK055_RS27885	VK055_RS27885	essential
ecl8_00284	tusA	TRUE		KPNIH1_05325	KPNIH1_05325	TRUE		KPNRH_00149	rfaF	essential		VK055_RS00280	argS	essential
ecl8_00290	ftsY	TRUE		KPNIH1_05390	KPNIH1_05390	TRUE		KPNRH_00160	gpsA	essential		VK055_RS00320	aspS	essential
ecl8_00293	rpoH	TRUE		KPNIH1_05515	yajC	TRUE		KPNRH_00161	cysE	essential		VK055_RS00625	tsaB	essential
ecl8_00318	asd_1	TRUE		KPNIH1_05565	nusB	TRUE		KPNRH_00190	glyQ	essential		VK055_RS01040	VK055_RS01040	essential
ecl8_00386	tusD	TRUE		KPNIH1_05915	rpmJ	TRUE		KPNRH_00191	glyS	essential		VK055_RS01045	ispE	essential
ecl8_00387	tusC	TRUE		KPNIH1_06000	KPNIH1_06000	TRUE		KPNRH_00193	KPNRH_00193	essential		VK055_RS01050	lolB	essential
ecl8_00388	tusB	TRUE		KPNIH1_06145	KPNIH1_06145	TRUE		KPNRH_00216	KPNRH_00216	essential		VK055_RS01055	hemA	essential
ecl8_00389	rpsL	TRUE		KPNIH1_06155	KPNIH1_06155	TRUE		KPNRH_00217	KPNRH_00217	essential		VK055_RS01060	prfA	essential
ecl8_00390	rpsG	TRUE		KPNIH1_06175	KPNIH1_06175	TRUE		KPNRH_00290	ftsY	essential		VK055_RS01080	kdsA	essential
ecl8_00391	fusA_1	TRUE		KPNIH1_06180	KPNIH1_06180	TRUE		KPNRH_00293	rpoH	essential		VK055_RS01200	VK055_RS01200	essential
ecl8_00396	rpsJ	TRUE		KPNIH1_06225	KPNIH1_06225	TRUE		KPNRH_00321	asd_1	essential		VK055_RS01205	VK055_RS01205	essential
ecl8_00397	rplC	TRUE		KPNIH1_06435	KPNIH1_06435	TRUE		KPNRH_00362	dam_1	essential		VK055_RS01235	VK055_RS01235	essential
ecl8_00398	rplD	TRUE		KPNIH1_07050	KPNIH1_07050	TRUE		KPNRH_00378	crp	essential		VK055_RS01360	thrS	essential
ecl8_00399	rplW	TRUE		KPNIH1_07240	KPNIH1_07240	TRUE		KPNRH_00391	tusD	essential		VK055_RS01365	infC	essential
ecl8_00400	rplB	TRUE		KPNIH1_07525	KPNIH1_07525	TRUE		KPNRH_00393	tusB	essential		VK055_RS01370	rpmI	essential
ecl8_00401	rpsS	TRUE		KPNIH1_07895	KPNIH1_07895	TRUE		KPNRH_00394	rpsL	essential		VK055_RS01375	rplT	essential
ecl8_00402	rplV	TRUE		KPNIH1_07995	gpmA	TRUE		KPNRH_00395	rpsG	essential		VK055_RS27900	pheM	essential
ecl8_00403	rpsC	TRUE		KPNIH1_08535	KPNIH1_08535	TRUE		KPNRH_00396	fusA_1	essential		VK055_RS26535	pheM	essential
ecl8_00404	rplP	TRUE		KPNIH1_08605	KPNIH1_08605	TRUE		KPNRH_00401	rpsJ	essential		VK055_RS01380	pheS	essential
ecl8_00405	rpmC	TRUE		KPNIH1_08830	KPNIH1_08830	TRUE		KPNRH_00402	rplC	essential		VK055_RS01385	pheT	essential
ecl8_00406	rpsQ	TRUE		KPNIH1_09000	KPNIH1_09000	TRUE		KPNRH_00403	rplD	essential		VK055_RS02370	VK055_RS02370	essential
ecl8_00407	rplN	TRUE		KPNIH1_09325	KPNIH1_09325	TRUE		KPNRH_00404	rplW	essential		VK055_RS02375	VK055_RS02375	essential
ecl8_00408	rplX	TRUE		KPNIH1_09410	KPNIH1_09410	TRUE		KPNRH_00405	rplB	essential		VK055_RS02395	VK055_RS02395	essential
ecl8_00409	rplE	TRUE		KPNIH1_09755	KPNIH1_09755	TRUE		KPNRH_00406	rpsS	essential		VK055_RS02530	tyrS	essential
ecl8_00410	rpsN	TRUE		KPNIH1_09835	KPNIH1_09835	TRUE		KPNRH_00407	rplV	essential		VK055_RS27945	VK055_RS27945	essential
ecl8_00411	rpsH	TRUE		KPNIH1_09915	KPNIH1_09915	TRUE		KPNRH_00408	rpsC	essential		VK055_RS05845	fabI	essential
ecl8_00412	rplF	TRUE		KPNIH1_09940	KPNIH1_09940	TRUE		KPNRH_00409	rplP	essential		VK055_RS05895	lapB	essential
ecl8_00413	rplR	TRUE		KPNIH1_10340	KPNIH1_10340	TRUE		KPNRH_00410	rpmC	essential		VK055_RS05900	VK055_RS05900	essential
ecl8_00414	rpsE	TRUE		KPNIH1_10665	KPNIH1_10665	TRUE		KPNRH_00411	rpsQ	essential		VK055_RS05910	ribA	essential
ecl8_00415	rpmD	TRUE		KPNIH1_10675	KPNIH1_10675	TRUE		KPNRH_00412	rplN	essential		VK055_RS05935	topA	essential
ecl8_00416	rplO	TRUE		KPNIH1_10760	KPNIH1_10760	TRUE		KPNRH_00413	rplX	essential		VK055_RS06175	nadE	essential
ecl8_00417	secY	TRUE		KPNIH1_10805	KPNIH1_10805	TRUE		KPNRH_00414	rplE	essential		VK055_RS06340	gapA	essential
ecl8_00418	rpsM	TRUE		KPNIH1_10810	KPNIH1_10810	TRUE		KPNRH_00415	rpsN	essential		VK055_RS06625	VK055_RS06625	essential
ecl8_00419	rpsD	TRUE		KPNIH1_10815	KPNIH1_10815	TRUE		KPNRH_00416	rpsH	essential		VK055_RS06640	mnmA	essential
ecl8_00420	rpoA	TRUE		KPNIH1_10910	KPNIH1_10910	TRUE		KPNRH_00417	rplF	essential		VK055_RS06645	hflD	essential
ecl8_00421	rplQ	TRUE		KPNIH1_11085	pspB	TRUE		KPNRH_00418	rplR	essential		VK055_RS06650	purB	essential
ecl8_00429	fmt	TRUE		KPNIH1_11155	KPNIH1_11155	TRUE		KPNRH_00419	rpsE	essential		VK055_RS06775	lolE	essential
ecl8_00434	tsaC	TRUE		KPNIH1_11215	KPNIH1_11215	TRUE		KPNRH_00420	rpmD	essential		VK055_RS06780	lolD	essential
ecl8_00452	accC_1	TRUE		KPNIH1_11225	KPNIH1_11225	TRUE		KPNRH_00421	rplO	essential		VK055_RS06785	lolC	essential
ecl8_00453	accB_1	TRUE		KPNIH1_11245	KPNIH1_11245	TRUE		KPNRH_00422	secY	essential		VK055_RS06880	holB	essential
ecl8_00454	aroQ	TRUE		KPNIH1_11275	KPNIH1_11275	TRUE		KPNRH_00423	KPNRH_00423	essential		VK055_RS06885	VK055_RS06885	essential
ecl8_00458	mreB	TRUE		KPNIH1_11280	KPNIH1_11280	TRUE		KPNRH_00424	rpsM	essential		VK055_RS06905	acpP	essential
ecl8_00459	mreC	TRUE		KPNIH1_11610	KPNIH1_11610	TRUE		KPNRH_00425	rpsD	essential		VK055_RS06910	fabG	essential
ecl8_00460	mreD	TRUE		KPNIH1_11800	KPNIH1_11800	TRUE		KPNRH_00426	rpoA	essential		VK055_RS06915	fabD	essential
ecl8_00478	rplM	TRUE		KPNIH1_11805	KPNIH1_11805	TRUE		KPNRH_00427	rplQ	essential		VK055_RS06920	VK055_RS06920	essential
ecl8_00479	rpsI	TRUE		KPNIH1_11905	KPNIH1_11905	TRUE		KPNRH_00434	fmt	essential		VK055_RS06950	VK055_RS06950	essential
ecl8_00497	lptB_2	TRUE		KPNIH1_12190	KPNIH1_12190	TRUE		KPNRH_00439	tsaC	essential		VK055_RS06965	murJ	essential
ecl8_00498	lptA	TRUE		KPNIH1_12570	KPNIH1_12570	TRUE		KPNRH_00443	KPNRH_00443	essential		VK055_RS07095	VK055_RS07095	essential
ecl8_00499	lptC	TRUE		KPNIH1_12595	KPNIH1_12595	TRUE		KPNRH_00444	KPNRH_00444	essential		VK055_RS07115	VK055_RS07115	essential
ecl8_00509	murA	TRUE		KPNIH1_12620	KPNIH1_12620	TRUE		KPNRH_00445	KPNRH_00445	essential		VK055_RS07435	VK055_RS07435	essential
ecl8_00511	ispB	TRUE		KPNIH1_12770	KPNIH1_12770	TRUE		KPNRH_00446	KPNRH_00446	essential		VK055_RS07450	tusE	essential
ecl8_00512	rplU	TRUE		KPNIH1_12830	KPNIH1_12830	TRUE		KPNRH_00447	KPNRH_00447	essential		VK055_RS07530	fabA	essential
ecl8_00513	rpmA	TRUE		KPNIH1_12905	KPNIH1_12905	TRUE		KPNRH_00448	KPNRH_00448	essential		VK055_RS07645	asnS	essential
ecl8_00515	obgE	TRUE		KPNIH1_12960	KPNIH1_12960	TRUE		KPNRH_00466	KPNRH_00466	essential		VK055_RS07675	mukB	essential
ecl8_00520	ftsH_1	TRUE		KPNIH1_12965	KPNIH1_12965	TRUE		KPNRH_00468	KPNRH_00468	essential		VK055_RS07680	mukE	essential
ecl8_00521	folP	TRUE		KPNIH1_13110	KPNIH1_13110	TRUE		KPNRH_00476	fis	essential		VK055_RS07685	mukF	essential
ecl8_00522	glmM	TRUE		KPNIH1_13325	KPNIH1_13325	TRUE		KPNRH_00481	accC	essential		VK055_RS07705	kdsB	essential
ecl8_00531	nusA	TRUE		KPNIH1_13385	KPNIH1_13385	TRUE		KPNRH_00482	accB	essential		VK055_RS07710	VK055_RS07710	essential
ecl8_00532	infB	TRUE		KPNIH1_13560	KPNIH1_13560	TRUE		KPNRH_00487	mreB	essential		VK055_RS07720	lpxK	essential
ecl8_00535	rpsO	TRUE		KPNIH1_13940	KPNIH1_13940	TRUE		KPNRH_00489	mreD	essential		VK055_RS07725	msbA	essential
ecl8_00631	rpoD	TRUE		KPNIH1_14385	KPNIH1_14385	TRUE		KPNRH_00507	rplM	essential		VK055_RS07740	rpsA	essential
ecl8_00632	dnaG	TRUE		KPNIH1_14390	KPNIH1_14390	TRUE		KPNRH_00508	rpsI	essential		VK055_RS07745	VK055_RS07745	essential
ecl8_00634	tsaD	TRUE		KPNIH1_14400	KPNIH1_14400	TRUE		KPNRH_00527	lptB_2	essential		VK055_RS07810	serS	essential
ecl8_00644	folB	TRUE		KPNIH1_14500	KPNIH1_14500	TRUE		KPNRH_00528	lptA	essential		VK055_RS07820	lolA	essential
ecl8_00646	cca	TRUE		KPNIH1_14565	KPNIH1_14565	TRUE		KPNRH_00539	murA	essential		VK055_RS07825	ftsK	essential
ecl8_00650	hldE	TRUE		KPNIH1_14680	KPNIH1_14680	TRUE		KPNRH_00541	ispB	essential		VK055_RS07845	cydD	essential
ecl8_00653	ribB	TRUE		KPNIH1_14695	KPNIH1_14695	TRUE		KPNRH_00542	rplU	essential		VK055_RS07850	cydC	essential
ecl8_00663	parE	TRUE		KPNIH1_14740	KPNIH1_14740	TRUE		KPNRH_00543	rpmA	essential		VK055_RS07860	infA	essential
ecl8_00670	parC	TRUE		KPNIH1_14875	KPNIH1_14875	TRUE		KPNRH_00550	rlmE	essential		VK055_RS08880	VK055_RS08880	essential
ecl8_00671	plsC	TRUE		KPNIH1_14955	KPNIH1_14955	TRUE		KPNRH_00551	ftsH	essential		VK055_RS08885	VK055_RS08885	essential
ecl8_00728	yqgF	TRUE		KPNIH1_15060	KPNIH1_15060	TRUE		KPNRH_00553	glmM	essential		VK055_RS08890	VK055_RS08890	essential
ecl8_00735	metK	TRUE		KPNIH1_15145	KPNIH1_15145	TRUE		KPNRH_00554	secG	essential		VK055_RS08895	VK055_RS08895	essential
ecl8_00741	pgk	TRUE		KPNIH1_15225	KPNIH1_15225	TRUE		KPNRH_00555	KPNRH_00555	essential		VK055_RS08900	VK055_RS08900	essential
ecl8_00742	fbaA_1	TRUE		KPNIH1_15380	KPNIH1_15380	TRUE		KPNRH_00561	KPNRH_00561	essential		VK055_RS08905	VK055_RS08905	essential
ecl8_00747	rpiA	TRUE		KPNIH1_15430	KPNIH1_15430	TRUE		KPNRH_00562	rimP	essential		VK055_RS08910	VK055_RS08910	essential
ecl8_00753	ubiH	TRUE		KPNIH1_15505	KPNIH1_15505	TRUE		KPNRH_00563	nusA	essential		VK055_RS08985	odhB	essential
ecl8_00767	ygfZ	TRUE		KPNIH1_15510	KPNIH1_15510	TRUE		KPNRH_00564	infB	essential		VK055_RS09135	fldA	essential
ecl8_00774	prfB	TRUE		KPNIH1_15610	ihfA	TRUE		KPNRH_00565	rbfA	essential		VK055_RS09140	fur	essential
ecl8_00775	lysS	TRUE		KPNIH1_15630	KPNIH1_15630	TRUE		KPNRH_00567	KPNRH_00567	essential		VK055_RS09165	glnS	essential
ecl8_00891	lgt	TRUE		KPNIH1_16015	KPNIH1_16015	TRUE		KPNRH_00568	rpsO	essential		VK055_RS09200	VK055_RS09200	essential
ecl8_00892	thyA	TRUE		KPNIH1_16025	KPNIH1_16025	TRUE		KPNRH_00608	KPNRH_00608	essential		VK055_RS09205	VK055_RS09205	essential
ecl8_00994	pyrG_1	TRUE		KPNIH1_16045	KPNIH1_16045	TRUE		KPNRH_00669	KPNRH_00669	essential		VK055_RS09210	VK055_RS09210	essential
ecl8_00995	eno	TRUE		KPNIH1_16050	KPNIH1_16050	TRUE		KPNRH_00671	rpoD	essential		VK055_RS09215	VK055_RS09215	essential
ecl8_01009	ispD	TRUE		KPNIH1_16080	KPNIH1_16080	TRUE		KPNRH_00672	dnaG	essential		VK055_RS09220	VK055_RS09220	essential
ecl8_01010	ispF	TRUE		KPNIH1_16085	KPNIH1_16085	TRUE		KPNRH_00674	tsaD	essential		VK055_RS09225	VK055_RS09225	essential
ecl8_01033	ecl8_01033	TRUE		KPNIH1_16340	KPNIH1_16340	TRUE		KPNRH_00687	cca	essential		VK055_RS09230	VK055_RS09230	essential
ecl8_01036	ecl8_01036	TRUE		KPNIH1_16345	KPNIH1_16345	TRUE		KPNRH_00691	hldE	essential		VK055_RS09235	ubiF	essential
ecl8_01100	alaS	TRUE		KPNIH1_16530	KPNIH1_16530	TRUE		KPNRH_00695	ribB	essential		VK055_RS09245	VK055_RS09245	essential
ecl8_01101	csrA	TRUE		KPNIH1_16655	ruvA	TRUE		KPNRH_00700	tolC	essential		VK055_RS09250	ybeY	essential
ecl8_01168	ecl8_01168	TRUE		KPNIH1_16890	KPNIH1_16890	TRUE		KPNRH_00705	parE	essential		VK055_RS09260	lnt	essential
ecl8_01169	ecl8_01169	TRUE		KPNIH1_17060	KPNIH1_17060	TRUE		KPNRH_00712	parC	essential		VK055_RS09305	leuS	essential
ecl8_01178	nadK	TRUE		KPNIH1_17065	KPNIH1_17065	TRUE		KPNRH_00713	plsC	essential		VK055_RS09310	lptE	essential
ecl8_01179	grpE	TRUE		KPNIH1_17070	KPNIH1_17070	TRUE		KPNRH_00754	KPNRH_00754	essential		VK055_RS09315	holA	essential
ecl8_01182	ffh	TRUE		KPNIH1_17085	KPNIH1_17085	TRUE		KPNRH_00803	KPNRH_00803	essential		VK055_RS09320	nadD	essential
ecl8_01183	rpsP	TRUE		KPNIH1_17090	KPNIH1_17090	TRUE		KPNRH_00820	yqgF	essential		VK055_RS09330	rsfS	essential
ecl8_01184	rimM	TRUE		KPNIH1_17095	KPNIH1_17095	TRUE		KPNRH_00827	metK	essential		VK055_RS09335	rlmH	essential
ecl8_01185	trmD	TRUE		KPNIH1_17120	KPNIH1_17120	TRUE		KPNRH_00849	pgk	essential		VK055_RS09340	VK055_RS09340	essential
ecl8_01186	rplS	TRUE		KPNIH1_17130	KPNIH1_17130	TRUE		KPNRH_00850	fbaA_1	essential		VK055_RS09345	mrdB	essential
ecl8_01197	bamD	TRUE		KPNIH1_17135	KPNIH1_17135	TRUE		KPNRH_00855	rpiA	essential		VK055_RS09375	lipA	essential
ecl8_01207	pssA	TRUE		KPNIH1_17140	KPNIH1_17140	TRUE		KPNRH_00862	ubiH	essential		VK055_RS28020	VK055_RS28020	essential
ecl8_01222	lepB	TRUE		KPNIH1_17145	KPNIH1_17145	TRUE		KPNRH_00863	ubiI	essential		VK055_RS28025	VK055_RS28025	essential
ecl8_01223	rnc	TRUE		KPNIH1_17150	KPNIH1_17150	TRUE		KPNRH_00876	ygfZ	essential		VK055_RS10325	VK055_RS10325	essential
ecl8_01224	era	TRUE		KPNIH1_17250	KPNIH1_17250	TRUE		KPNRH_00883	prfB	essential		VK055_RS10330	folD	essential
ecl8_01226	pdxJ	TRUE		KPNIH1_17380	KPNIH1_17380	TRUE		KPNRH_00884	lysS	essential		VK055_RS10340	cysS	essential
ecl8_01227	acpS	TRUE		KPNIH1_17390	KPNIH1_17390	TRUE		KPNRH_00970	lgt	essential		VK055_RS10345	ppiB	essential
ecl8_01239	glyA1	TRUE		KPNIH1_17420	KPNIH1_17420	TRUE		KPNRH_00971	thyA_1	essential		VK055_RS10350	lpxH	essential
ecl8_01251	suhB_1	TRUE		KPNIH1_17675	KPNIH1_17675	TRUE		KPNRH_00976	recC	essential		VK055_RS10480	VK055_RS10480	essential
ecl8_01254	iscS	TRUE		KPNIH1_17835	folE	TRUE		KPNRH_00978	recB	essential		VK055_RS10485	VK055_RS10485	essential
ecl8_01255	iscU	TRUE		KPNIH1_17970	KPNIH1_17970	TRUE		KPNRH_01029	KPNRH_01029	essential		VK055_RS10505	VK055_RS10505	essential
ecl8_01258	hscA	TRUE		KPNIH1_17980	KPNIH1_17980	TRUE		KPNRH_01030	KPNRH_01030	essential		VK055_RS26415	ffs	essential
ecl8_01271	ispG	TRUE		KPNIH1_18235	KPNIH1_18235	TRUE		KPNRH_01075	pyrG_1	essential		VK055_RS10905	xseB	essential
ecl8_01272	hisS	TRUE		KPNIH1_18715	KPNIH1_18715	TRUE		KPNRH_01076	eno	essential		VK055_RS10910	ispA	essential
ecl8_01275	der	TRUE		KPNIH1_18800	KPNIH1_18800	TRUE		KPNRH_01090	ispD	essential		VK055_RS10915	VK055_RS10915	essential
ecl8_01295	hda	TRUE		KPNIH1_19245	KPNIH1_19245	TRUE		KPNRH_01091	ispF	essential		VK055_RS10930	thiL	essential
ecl8_01302	dapA_1	TRUE		KPNIH1_19355	KPNIH1_19355	TRUE		KPNRH_01172	alaS	essential		VK055_RS10935	nusB	essential
ecl8_01309	dapE	TRUE		KPNIH1_19670	KPNIH1_19670	TRUE		KPNRH_01173	csrA	essential		VK055_RS10940	ribE	essential
ecl8_01355	zipA	TRUE		KPNIH1_19685	KPNIH1_19685	TRUE		KPNRH_01174	KPNRH_01174	essential		VK055_RS10945	ribD	essential
ecl8_01356	ligA	TRUE		KPNIH1_19815	rimM	TRUE		KPNRH_01175	KPNRH_01175	essential		VK055_RS10950	nrdR	essential
ecl8_01364	gltX	TRUE		KPNIH1_19945	KPNIH1_19945	TRUE		KPNRH_01176	KPNRH_01176	essential		VK055_RS10975	secF	essential
ecl8_01395	lexA_1	TRUE		KPNIH1_20020	KPNIH1_20020	TRUE		KPNRH_01177	KPNRH_01177	essential		VK055_RS10980	secD	essential
ecl8_01454	fabB	TRUE		KPNIH1_20085	KPNIH1_20085	TRUE		KPNRH_01246	nadK	essential		VK055_RS10985	yajC	essential
ecl8_01461	accD	TRUE		KPNIH1_20115	KPNIH1_20115	TRUE		KPNRH_01247	grpE	essential		VK055_RS11205	hemB	essential
ecl8_01462	folC	TRUE		KPNIH1_20660	KPNIH1_20660	TRUE		KPNRH_01250	ffh	essential		VK055_RS28050	VK055_RS28050	essential
ecl8_01466	ubiX	TRUE		KPNIH1_20725	KPNIH1_20725	TRUE		KPNRH_01251	rpsP	essential		VK055_RS11670	lpcA	essential
ecl8_01524	nrdB	TRUE		KPNIH1_20790	KPNIH1_20790	TRUE		KPNRH_01252	rimM	essential		VK055_RS11695	VK055_RS11695	essential
ecl8_01525	nrdA	TRUE		KPNIH1_21850	lysS	TRUE		KPNRH_01253	trmD	essential		VK055_RS11700	dnaQ	essential
ecl8_01526	ubiG	TRUE		KPNIH1_22205	KPNIH1_22205	TRUE		KPNRH_01254	rplS	essential		VK055_RS11750	VK055_RS11750	essential
ecl8_01527	gyrA	TRUE		KPNIH1_22315	KPNIH1_22315	TRUE		KPNRH_01270	KPNRH_01270	essential		VK055_RS11755	rrf	essential
ecl8_01549	ecl8_01549	TRUE		KPNIH1_22390	KPNIH1_22390	TRUE		KPNRH_01271	KPNRH_01271	essential		VK055_RS11760	VK055_RS11760	essential
ecl8_01555	rplY	TRUE		KPNIH1_22445	KPNIH1_22445	TRUE		KPNRH_01272	KPNRH_01272	essential		VK055_RS11765	VK055_RS11765	essential
ecl8_01584	folE	TRUE		KPNIH1_22840	KPNIH1_22840	TRUE		KPNRH_01273	KPNRH_01273	essential		VK055_RS11770	VK055_RS11770	essential
ecl8_01614	metG	TRUE		KPNIH1_22870	folB	TRUE		KPNRH_01274	KPNRH_01274	essential		VK055_RS11775	VK055_RS11775	essential
ecl8_01652	ecl8_01652	TRUE		KPNIH1_23480	KPNIH1_23480	TRUE		KPNRH_01277	pssA	essential		VK055_RS11810	proS	essential
ecl8_01735	ecl8_01735	TRUE		KPNIH1_23750	KPNIH1_23750	TRUE		KPNRH_01287	rpoE	essential		VK055_RS11845	tilS	essential
ecl8_01782	pgsA	TRUE		KPNIH1_23930	KPNIH1_23930	TRUE		KPNRH_01292	lepB	essential		VK055_RS11860	accA	essential
ecl8_01804	argS	TRUE		KPNIH1_24145	KPNIH1_24145	TRUE		KPNRH_01294	rnc	essential		VK055_RS11865	dnaE	essential
ecl8_01812	aspS	TRUE		KPNIH1_24205	KPNIH1_24205	TRUE		KPNRH_01295	era	essential		VK055_RS11870	rnhB	essential
ecl8_01815	ruvC	TRUE		KPNIH1_24295	KPNIH1_24295	TRUE		KPNRH_01298	acpS	essential		VK055_RS11875	lpxB	essential
ecl8_01816	ruvA	TRUE		KPNIH1_24300	KPNIH1_24300	TRUE		KPNRH_01312	glyA1	essential		VK055_RS11880	lpxA	essential
ecl8_01817	ruvB	TRUE		KPNIH1_24305	KPNIH1_24305	TRUE		KPNRH_01323	suhB_1	essential		VK055_RS11885	fabZ	essential
ecl8_01869	tsaB	TRUE		KPNIH1_24800	KPNIH1_24800	TRUE		KPNRH_01327	iscS	essential		VK055_RS11890	lpxD	essential
ecl8_01873	minE	TRUE		KPNIH1_24845	KPNIH1_24845	TRUE		KPNRH_01328	iscU	essential		VK055_RS11895	skp	essential
ecl8_01924	safA	TRUE		KPNIH1_25455	KPNIH1_25455	TRUE		KPNRH_01329	iscA	essential		VK055_RS11900	bamA	essential
ecl8_01925	ecl8_01925	TRUE		KPNIH1_25595	KPNIH1_25595	TRUE		KPNRH_01330	hscB	essential		VK055_RS11905	rseP	essential
ecl8_01926	ecl8_01926	TRUE		KPNIH1_25920	KPNIH1_25920	TRUE		KPNRH_01331	hscA	essential		VK055_RS11910	cdsA	essential
ecl8_01936	pth	TRUE		KPNIH1_26230	KPNIH1_26230	TRUE		KPNRH_01332	fdx	essential		VK055_RS11915	ispU	essential
ecl8_01940	prs	TRUE		KPNIH1_26840	KPNIH1_26840	TRUE		KPNRH_01343	ispG	essential		VK055_RS11920	ispC	essential
ecl8_01941	ispE	TRUE		KPNIH1_26845	KPNIH1_26845	TRUE		KPNRH_01345	hisS	essential		VK055_RS11925	VK055_RS11925	essential
ecl8_01942	lolB	TRUE		KPNIH1_26935	KPNIH1_26935	TRUE		KPNRH_01348	der	essential		VK055_RS11930	pyrH	essential
ecl8_01943	hemA	TRUE		KPNIH1_27290	KPNIH1_27290	TRUE		KPNRH_01353	guaA	essential		VK055_RS11935	tsf	essential
ecl8_01944	prfA	TRUE		KPNIH1_27350	KPNIH1_27350	TRUE		KPNRH_01354	intS_1	essential		VK055_RS11940	rpsB	essential
ecl8_01948	kdsA	TRUE		KPNIH1_27810	KPNIH1_27810	TRUE		KPNRH_01355	KPNRH_01355	essential		VK055_RS11955	dapD	essential
ecl8_02009	thrS_1	TRUE		KPNIH1_28320	KPNIH1_28320	TRUE		KPNRH_01356	KPNRH_01356	essential		VK055_RS11995	erpA	essential
ecl8_02010	infC	TRUE		KPNIH1_26250	KPNIH1_26250	TRUE		KPNRH_01357	KPNRH_01357	essential		VK055_RS12005	VK055_RS12005	essential
ecl8_02011	rpmI	TRUE		KPNIH1_05715	KPNIH1_05715	TRUE		KPNRH_01358	KPNRH_01358	essential		VK055_RS12160	folK	essential
ecl8_02012	rplT	TRUE		KPNIH1_24445	KPNIH1_24445	TRUE		KPNRH_01359	KPNRH_01359	essential		VK055_RS12280	lpdA	essential
ecl8_02013	pheS	TRUE		KPNIH1_18110	KPNIH1_18110	TRUE		KPNRH_01360	KPNRH_01360	essential		VK055_RS12380	secA	essential
ecl8_02014	pheT	TRUE		KPNIH1_14770	KPNIH1_14770	TRUE		KPNRH_01361	recE_1	essential		VK055_RS12385	secM	essential
ecl8_02120	ccmB_2	TRUE		KPNIH1_03100	KPNIH1_03100	TRUE		KPNRH_01362	KPNRH_01362	essential		VK055_RS12390	lpxC	essential
ecl8_02130	ecl8_02130	TRUE		KPNIH1_23220	KPNIH1_23220	TRUE		KPNRH_01363	KPNRH_01363	essential		VK055_RS12395	ftsZ	essential
ecl8_02133	ecl8_02133	TRUE		KPNIH1_12065	KPNIH1_12065	TRUE		KPNRH_01364	KPNRH_01364	essential		VK055_RS12400	ftsA	essential
ecl8_02206	ribC	TRUE		KPNIH1_10355	KPNIH1_10355	TRUE		KPNRH_01365	KPNRH_01365	essential		VK055_RS12405	ftsQ	essential
ecl8_02232	pdxH	TRUE		KPNIH1_09825	rpmF	TRUE		KPNRH_01366	KPNRH_01366	essential		VK055_RS12410	VK055_RS12410	essential
ecl8_02233	tyrS	TRUE		KPNIH1_19620	rnc	TRUE		KPNRH_01367	dnaT_1	essential		VK055_RS12415	murC	essential
ecl8_02369	ecl8_02369	TRUE		KPNIH1_12120	KPNIH1_12120	TRUE		KPNRH_01368	KPNRH_01368	essential		VK055_RS12420	murG	essential
ecl8_02463	ulaB_1	TRUE		KPNIH1_21170	KPNIH1_21170	TRUE		KPNRH_01369	KPNRH_01369	essential		VK055_RS12425	ftsW	essential
ecl8_02467	mngA	TRUE		KPNIH1_12855	KPNIH1_12855	TRUE		KPNRH_01370	KPNRH_01370	essential		VK055_RS12430	murD	essential
ecl8_02539	hipB	TRUE		KPNIH1_12800	KPNIH1_12800	TRUE		KPNRH_01371	KPNRH_01371	essential		VK055_RS12435	mraY	essential
ecl8_02566	ecl8_02566	TRUE		KPNIH1_24270	KPNIH1_24270	TRUE		KPNRH_01372	KPNRH_01372	essential		VK055_RS12440	murF	essential
ecl8_02567	ecl8_02567	TRUE		KPNIH1_22455	KPNIH1_22455	TRUE		KPNRH_01373	KPNRH_01373	essential		VK055_RS12445	murE	essential
ecl8_02568	ecl8_02568	TRUE		KPNIH1_11870	paaB	TRUE		KPNRH_01374	KPNRH_01374	essential		VK055_RS12450	VK055_RS12450	essential
ecl8_02630	nreC	TRUE		KPNIH1_23780	KPNIH1_23780	TRUE		KPNRH_01375	KPNRH_01375	essential		VK055_RS12455	ftsL	essential
ecl8_02631	ecl8_02631	TRUE		KPNIH1_12625	KPNIH1_12625	TRUE		KPNRH_01376	KPNRH_01376	essential		VK055_RS12460	rsmH	essential
ecl8_02849	ecl8_02849	TRUE		KPNIH1_19965	KPNIH1_19965	TRUE		KPNRH_01377	KPNRH_01377	essential		VK055_RS12655	lptD	essential
ecl8_02876	fabI	TRUE		KPNIH1_13400	KPNIH1_13400	TRUE		KPNRH_01378	KPNRH_01378	essential		VK055_RS12685	folA	essential
ecl8_02877	ecl8_02877	TRUE		KPNIH1_18095	KPNIH1_18095	TRUE		KPNRH_01379	KPNRH_01379	essential		VK055_RS12725	dapB	essential
ecl8_02886	lapB_2	TRUE		KPNIH1_22580	KPNIH1_22580	TRUE		KPNRH_01380	KPNRH_01380	essential		VK055_RS12805	ispH	essential
ecl8_02887	lapA	TRUE		KPNIH1_18840	KPNIH1_18840	TRUE		KPNRH_01381	KPNRH_01381	essential		VK055_RS12815	VK055_RS12815	essential
ecl8_02889	ribA	TRUE		KPNIH1_20310	KPNIH1_20310	TRUE		KPNRH_01382	KPNRH_01382	essential		VK055_RS12820	ileS	essential
ecl8_02892	cysB	TRUE		KPNIH1_10600	KPNIH1_10600	TRUE		KPNRH_01383	KPNRH_01383	essential		VK055_RS12825	ribF	essential
ecl8_02893	topA_2	TRUE		KPNIH1_13515	KPNIH1_13515	TRUE		KPNRH_01384	KPNRH_01384	essential		VK055_RS12830	rpsT	essential
ecl8_02935	nadE	TRUE		KPNIH1_20120	KPNIH1_20120	TRUE		KPNRH_01385	KPNRH_01385	essential		VK055_RS12855	dnaK	essential
ecl8_02967	gapA	TRUE		KPNIH1_18195	KPNIH1_18195	TRUE		KPNRH_01386	KPNRH_01386	essential		VK055_RS13070	VK055_RS13070	essential
ecl8_03013	ecl8_03013	TRUE		KPNIH1_08710	KPNIH1_08710	TRUE		KPNRH_01387	KPNRH_01387	essential		VK055_RS13080	VK055_RS13080	essential
ecl8_03021	dgcC	TRUE		KPNIH1_09130	ihfB	TRUE		KPNRH_01388	KPNRH_01388	essential		VK055_RS13090	VK055_RS13090	essential
ecl8_03025	icd_2	TRUE		KPNIH1_27565	KPNIH1_27565	TRUE		KPNRH_01389	KPNRH_01389	essential		VK055_RS13160	dnaT	essential
ecl8_03028	mnmA	TRUE		KPNIH1_09530	KPNIH1_09530	TRUE		KPNRH_01390	KPNRH_01390	essential		VK055_RS13165	dnaC	essential
ecl8_03030	purB	TRUE		KPNIH1_16040	KPNIH1_16040	TRUE		KPNRH_01391	KPNRH_01391	essential		VK055_RS13545	rrf	essential
ecl8_03058	lolE	TRUE		KPNIH1_26735	KPNIH1_26735	TRUE		KPNRH_01392	KPNRH_01392	essential		VK055_RS13550	VK055_RS13550	essential
ecl8_03059	lolD	TRUE		KPNIH1_13065	KPNIH1_13065	TRUE		KPNRH_01393	KPNRH_01393	essential		VK055_RS13555	VK055_RS13555	essential
ecl8_03060	lolC	TRUE		KPNIH1_18920	KPNIH1_18920	TRUE		KPNRH_01394	KPNRH_01394	essential		VK055_RS13560	VK055_RS13560	essential
ecl8_03076	holB	TRUE		KPNIH1_16020	KPNIH1_16020	TRUE		KPNRH_01403	KPNRH_01403	essential		VK055_RS13920	VK055_RS13920	essential
ecl8_03077	tmk	TRUE		KPNIH1_18975	KPNIH1_18975	TRUE		KPNRH_01404	KPNRH_01404	essential		VK055_RS28105	VK055_RS28105	essential
ecl8_03081	acpP	TRUE		KPNIH1_12455	KPNIH1_12455	TRUE		KPNRH_01407	KPNRH_01407	essential		VK055_RS28110	VK055_RS28110	essential
ecl8_03082	fabG_10	TRUE		KPNIH1_12580	KPNIH1_12580	TRUE		KPNRH_01408	KPNRH_01408	essential		VK055_RS14035	lptG	essential
ecl8_03083	fabD_2	TRUE		KPNIH1_26835	KPNIH1_26835	TRUE		KPNRH_01409	KPNRH_01409	essential		VK055_RS14040	lptF	essential
ecl8_03084	fabH	TRUE		KPNIH1_27905	KPNIH1_27905	TRUE		KPNRH_01410	KPNRH_01410	essential		VK055_RS14050	holC	essential
ecl8_03090	rne	TRUE		KPNIH1_09005	clpS	TRUE		KPNRH_01411	KPNRH_01411	essential		VK055_RS14055	VK055_RS14055	essential
ecl8_03093	murJ	TRUE		KPNIH1_23225	KPNIH1_23225	TRUE		KPNRH_01412	KPNRH_01412	essential		VK055_RS14320	VK055_RS14320	essential
ecl8_03170	tusE	TRUE		KPNIH1_09280	KPNIH1_09280	TRUE		KPNRH_01413	KPNRH_01413	essential		VK055_RS14435	rpsR	essential
ecl8_03174	ecl8_03174	TRUE		KPNIH1_11265	KPNIH1_11265	TRUE		KPNRH_01414	KPNRH_01414	essential		VK055_RS14440	priB	essential
ecl8_03193	fabA	TRUE		KPNIH1_09545	KPNIH1_09545	TRUE		KPNRH_01429	hda	essential		VK055_RS14445	rpsF	essential
ecl8_03214	asnS	TRUE		KPNIH1_14630	KPNIH1_14630	TRUE		KPNRH_01436	dapA_1	essential		VK055_RS14590	tsaE	essential
ecl8_03221	mukB	TRUE		KPNIH1_24770	KPNIH1_24770	TRUE		KPNRH_01484	crr	essential		VK055_RS14605	VK055_RS14605	essential
ecl8_03222	mukE	TRUE		KPNIH1_11090	KPNIH1_11090	TRUE		KPNRH_01485	ptsI	essential		VK055_RS14610	VK055_RS14610	essential
ecl8_03223	mukF	TRUE		KPNIH1_13580	KPNIH1_13580	TRUE		KPNRH_01489	zipA	essential		VK055_RS14615	VK055_RS14615	essential
ecl8_03227	kdsB	TRUE		KPNIH1_05090	KPNIH1_05090	TRUE		KPNRH_01490	ligA	essential		VK055_RS14630	VK055_RS14630	essential
ecl8_03228	ecl8_03228	TRUE		KPNIH1_14960	KPNIH1_14960	TRUE		KPNRH_01494	KPNRH_01494	essential		VK055_RS14635	rsgA	essential
ecl8_03230	lpxK	TRUE		KPNIH1_28335	KPNIH1_28335	TRUE		KPNRH_01498	gltX	essential		VK055_RS14765	groL	essential
ecl8_03231	msbA_1	TRUE		KPNIH1_12215	KPNIH1_12215	TRUE		KPNRH_01501	KPNRH_01501	essential		VK055_RS14770	VK055_RS14770	essential
ecl8_03234	rpsA	TRUE		KPNIH1_16405	KPNIH1_16405	TRUE		KPNRH_01535	fabB	essential		VK055_RS14825	VK055_RS14825	essential
ecl8_03235	cmk	TRUE		KPNIH1_11375	KPNIH1_11375	TRUE		KPNRH_01542	accD	essential		VK055_RS28120	VK055_RS28120	essential
ecl8_03247	serS	TRUE		KPNIH1_10250	KPNIH1_10250	TRUE		KPNRH_01543	folC	essential		VK055_RS28125	VK055_RS28125	essential
ecl8_03249	lolA	TRUE		KPNIH1_25675	rpoZ	TRUE		KPNRH_01547	ubiX	essential		VK055_RS15280	VK055_RS15280	essential
ecl8_03250	ftsK	TRUE		KPNIH1_12505	KPNIH1_12505	TRUE		KPNRH_01605	nrdB	essential		VK055_RS15315	dnaB	essential
ecl8_03256	infA	TRUE		KPNIH1_12845	KPNIH1_12845	TRUE		KPNRH_01606	nrdA	essential		VK055_RS15375	VK055_RS15375	essential
ecl8_03332	ecl8_03332	TRUE		KPNIH1_00095	KPNIH1_00095	TRUE		KPNRH_01607	ubiG	essential		VK055_RS15380	VK055_RS15380	essential
ecl8_03334	ecl8_03334	TRUE		KPNIH1_23675	mtgA	TRUE		KPNRH_01608	gyrA	essential		VK055_RS15560	rrf	essential
ecl8_03512	fldA	TRUE		KPNIH1_17805	KPNIH1_17805	TRUE		KPNRH_01631	rplY	essential		VK055_RS15565	VK055_RS15565	essential
ecl8_03518	glnS	TRUE		KPNIH1_10215	KPNIH1_10215	TRUE		KPNRH_01658	folE	essential		VK055_RS15570	VK055_RS15570	essential
ecl8_03532	ubiF	TRUE		KPNIH1_11515	KPNIH1_11515	TRUE		KPNRH_01753	ugd	essential		VK055_RS15575	VK055_RS15575	essential
ecl8_03535	ybeY	TRUE		KPNIH1_13675	KPNIH1_13675	TRUE		KPNRH_01754	wbgU	essential		VK055_RS15635	hemE	essential
ecl8_03537	lnt	TRUE		KPNIH1_05305	KPNIH1_05305	TRUE		KPNRH_01779	KPNRH_01779	essential		VK055_RS15705	rpoC	essential
ecl8_03545	leuS	TRUE		KPNIH1_22595	KPNIH1_22595	TRUE		KPNRH_01783	KPNRH_01783	essential		VK055_RS15710	rpoB	essential
ecl8_03546	lptE	TRUE		KPNIH1_18440	KPNIH1_18440	TRUE		KPNRH_01784	KPNRH_01784	essential		VK055_RS15715	rplL	essential
ecl8_03547	holA	TRUE		KPNIH1_08700	KPNIH1_08700	TRUE		KPNRH_01832	KPNRH_01832	essential		VK055_RS15720	rplJ	essential
ecl8_03548	nadD	TRUE		KPNIH1_18935	KPNIH1_18935	TRUE		KPNRH_01840	KPNRH_01840	essential		VK055_RS15725	rplA	essential
ecl8_03552	mrdA_2	TRUE		KPNIH1_11825	KPNIH1_11825	TRUE		KPNRH_01892	KPNRH_01892	essential		VK055_RS15730	rplK	essential
ecl8_03553	mrdB	TRUE		KPNIH1_00270	KPNIH1_00270	TRUE		KPNRH_01917	pgsA	essential		VK055_RS15735	nusG	essential
ecl8_03556	ecl8_03556	TRUE		KPNIH1_10460	KPNIH1_10460	TRUE		KPNRH_01918	KPNRH_01918	essential		VK055_RS15740	secE	essential
ecl8_03557	lipB	TRUE		KPNIH1_11730	KPNIH1_11730	TRUE		KPNRH_01919	KPNRH_01919	essential		VK055_RS15745	tuf	essential
ecl8_03559	lipA	TRUE		KPNIH1_24560	KPNIH1_24560	TRUE		KPNRH_01920	KPNRH_01920	essential		VK055_RS15750	VK055_RS15750	essential
ecl8_03763	ecl8_03763	TRUE		KPNIH1_27645	KPNIH1_27645	TRUE		KPNRH_01939	argS	essential		VK055_RS15755	VK055_RS15755	essential
ecl8_03807	ecl8_03807	TRUE		KPNIH1_18550	KPNIH1_18550	TRUE		KPNRH_01948	aspS	essential		VK055_RS15760	VK055_RS15760	essential
ecl8_03810	ecl8_03810	TRUE		KPNIH1_17695	KPNIH1_17695	TRUE		KPNRH_01952	ruvA	essential		VK055_RS15765	VK055_RS15765	essential
ecl8_03815	ecl8_03815	TRUE		KPNIH1_02835	KPNIH1_02835	TRUE		KPNRH_01953	ruvB	essential		VK055_RS15775	birA	essential
ecl8_03827	folD	TRUE		KPNIH1_13495	KPNIH1_13495	TRUE		KPNRH_01958	lpxM	essential		VK055_RS15780	murB	essential
ecl8_03829	cysS_1	TRUE		KPNIH1_24580	KPNIH1_24580	TRUE		KPNRH_01990	KPNRH_01990	essential		VK055_RS15785	rrf	essential
ecl8_03830	ppiB	TRUE		KPNIH1_21885	KPNIH1_21885	TRUE		KPNRH_02010	tsaB	essential		VK055_RS15790	VK055_RS15790	essential
ecl8_03831	lpxH	TRUE		KPNIH1_20450	KPNIH1_20450	TRUE		KPNRH_02013	KPNRH_02013	essential		VK055_RS15795	VK055_RS15795	essential
ecl8_03854	hemH	TRUE		KPNIH1_11355	KPNIH1_11355	TRUE		KPNRH_02072	KPNRH_02072	essential		VK055_RS15800	VK055_RS15800	essential
ecl8_03855	adk	TRUE		KPNIH1_07600	KPNIH1_07600	TRUE		KPNRH_02082	KPNRH_02082	essential		VK055_RS15805	VK055_RS15805	essential
ecl8_03859	dnaX	TRUE		KPNIH1_14010	KPNIH1_14010	TRUE		KPNRH_02095	pth	essential		VK055_RS15810	hemG	essential
ecl8_03938	ispA	TRUE		KPNIH1_18375	KPNIH1_18375	TRUE		KPNRH_02099	prs	essential		VK055_RS15845	ubiD	essential
ecl8_03939	dxs_3	TRUE		KPNIH1_16565	KPNIH1_16565	TRUE		KPNRH_02100	ispE	essential		VK055_RS15880	ubiB	essential
ecl8_03942	thiL_1	TRUE		KPNIH1_15310	KPNIH1_15310	TRUE		KPNRH_02101	lolB	essential		VK055_RS15890	ubiE	essential
ecl8_03943	nusB	TRUE		KPNIH1_10230	KPNIH1_10230	TRUE		KPNRH_02102	hemA	essential		VK055_RS16025	hemC	essential
ecl8_03944	ribE	TRUE		KPNIH1_16660	ruvC	TRUE		KPNRH_02103	prfA	essential		VK055_RS16030	hemD	essential
ecl8_03945	ribD	TRUE		KPNIH1_07255	KPNIH1_07255	TRUE		KPNRH_02107	kdsA	essential		VK055_RS16050	VK055_RS16050	essential
ecl8_03951	secF	TRUE		KPNIH1_03010	KPNIH1_03010	TRUE		KPNRH_02132	KPNRH_02132	essential		VK055_RS16055	VK055_RS16055	essential
ecl8_03952	secD	TRUE		KPNIH1_09890	KPNIH1_09890	TRUE		KPNRH_02133	KPNRH_02133	essential		VK055_RS16060	VK055_RS16060	essential
ecl8_03953	yajC	TRUE		KPNIH1_07390	KPNIH1_07390	TRUE		KPNRH_02134	KPNRH_02134	essential		VK055_RS16135	rho	essential
ecl8_04021	ecpR	TRUE		KPNIH1_13925	KPNIH1_13925	TRUE		KPNRH_02139	galU	essential		VK055_RS28135	VK055_RS28135	essential
ecl8_04085	dnaQ	TRUE		KPNIH1_15975	KPNIH1_15975	TRUE		KPNRH_02140	hns_2	essential		VK055_RS16170	rep	essential
ecl8_04086	rnhA	TRUE		KPNIH1_19980	KPNIH1_19980	TRUE		KPNRH_02161	thrS	essential		VK055_RS16240	VK055_RS16240	essential
ecl8_04107	proS_1	TRUE		KPNIH1_05085	KPNIH1_05085	TRUE		KPNRH_02162	infC	essential		VK055_RS16245	VK055_RS16245	essential
ecl8_04114	tilS	TRUE		KPNIH1_02345	KPNIH1_02345	TRUE		KPNRH_02163	rpmI	essential		VK055_RS16250	rrf	essential
ecl8_04117	accA	TRUE		KPNIH1_17860	KPNIH1_17860	TRUE		KPNRH_02164	rplT	essential		VK055_RS16255	VK055_RS16255	essential
ecl8_04118	dnaE	TRUE		KPNIH1_08230	moaC	TRUE		KPNRH_02165	pheS	essential		VK055_RS16260	VK055_RS16260	essential
ecl8_04120	lpxB	TRUE		KPNIH1_10770	KPNIH1_10770	TRUE		KPNRH_02166	pheT	essential		VK055_RS16265	VK055_RS16265	essential
ecl8_04121	lpxA	TRUE		KPNIH1_10435	KPNIH1_10435	TRUE		KPNRH_02280	KPNRH_02280	essential		VK055_RS16270	VK055_RS16270	essential
ecl8_04122	fabZ	TRUE		KPNIH1_10550	KPNIH1_10550	TRUE		KPNRH_02338	ribC	essential		VK055_RS16275	murI	essential
ecl8_04123	lpxD	TRUE		KPNIH1_14195	KPNIH1_14195	TRUE		KPNRH_02365	pdxH	essential		VK055_RS16405	priA	essential
ecl8_04125	bamA_1	TRUE		KPNIH1_11200	KPNIH1_11200	TRUE		KPNRH_02366	tyrS	essential		VK055_RS16675	VK055_RS16675	essential
ecl8_04126	rseP	TRUE		KPNIH1_13635	KPNIH1_13635	TRUE		KPNRH_02477	KPNRH_02477	essential		VK055_RS16715	rrf	essential
ecl8_04127	cdsA	TRUE		KPNIH1_19090	KPNIH1_19090	TRUE		KPNRH_02494	KPNRH_02494	essential		VK055_RS16720	VK055_RS16720	essential
ecl8_04128	uppS	TRUE		KPNIH1_06950	KPNIH1_06950	TRUE		KPNRH_02496	KPNRH_02496	essential		VK055_RS16725	VK055_RS16725	essential
ecl8_04129	dxr	TRUE		KPNIH1_15210	KPNIH1_15210	TRUE		KPNRH_02593	KPNRH_02593	essential		VK055_RS16730	VK055_RS16730	essential
ecl8_04130	frr	TRUE		KPNIH1_13695	KPNIH1_13695	TRUE		KPNRH_02671	hipB	essential		VK055_RS16875	glmU	essential
ecl8_04131	pyrH	TRUE		KPNIH1_12705	KPNIH1_12705	TRUE		KPNRH_02746	ltnD_1	essential		VK055_RS16880	glmS	essential
ecl8_04132	tsf	TRUE		KPNIH1_23145	KPNIH1_23145	TRUE		KPNRH_02747	otnK_1	essential		VK055_RS16975	yidC	essential
ecl8_04133	rpsB	TRUE		KPNIH1_01510	KPNIH1_01510	TRUE		KPNRH_02753	KPNRH_02753	essential		VK055_RS27245	rnpA	essential
ecl8_04136	dapD	TRUE		KPNIH1_05680	KPNIH1_05680	TRUE		KPNRH_02978	KPNRH_02978	essential		VK055_RS16990	rpmH	essential
ecl8_04144	erpA	TRUE		KPNIH1_23370	KPNIH1_23370	TRUE		KPNRH_02979	KPNRH_02979	essential		VK055_RS16995	dnaA	essential
ecl8_04173	folK	TRUE		KPNIH1_15105	KPNIH1_15105	TRUE		KPNRH_03001	KPNRH_03001	essential		VK055_RS17000	dnaN	essential
ecl8_04191	acnB	TRUE		KPNIH1_10650	KPNIH1_10650	TRUE		KPNRH_03002	KPNRH_03002	essential		VK055_RS17010	gyrB	essential
ecl8_04195	lpdA	TRUE		KPNIH1_24440	KPNIH1_24440	TRUE		KPNRH_03004	KPNRH_03004	essential		VK055_RS17575	VK055_RS17575	essential
ecl8_04209	coaE	TRUE		KPNIH1_09375	mgsA	TRUE		KPNRH_03006	KPNRH_03006	essential		VK055_RS17660	VK055_RS17660	essential
ecl8_04213	secA_2	TRUE		KPNIH1_16155	KPNIH1_16155	TRUE		KPNRH_03007	KPNRH_03007	essential		VK055_RS17665	coaBC	essential
ecl8_04214	secM	TRUE		KPNIH1_19510	KPNIH1_19510	TRUE		KPNRH_03017	KPNRH_03017	essential		VK055_RS17675	rpmB	essential
ecl8_04215	lpxC	TRUE		KPNIH1_16035	KPNIH1_16035	TRUE		KPNRH_03018	KPNRH_03018	essential		VK055_RS17690	coaD	essential
ecl8_04216	ftsZ	TRUE		KPNIH1_13125	KPNIH1_13125	TRUE		KPNRH_03046	KPNRH_03046	essential		VK055_RS17695	VK055_RS17695	essential
ecl8_04217	ftsA_2	TRUE		KPNIH1_14440	KPNIH1_14440	TRUE		KPNRH_03047	KPNRH_03047	essential		VK055_RS17700	VK055_RS17700	essential
ecl8_04218	ftsQ	TRUE		KPNIH1_21375	KPNIH1_21375	TRUE		KPNRH_03049	KPNRH_03049	essential		VK055_RS17715	VK055_RS17715	essential
ecl8_04220	murC	TRUE		KPNIH1_02880	KPNIH1_02880	TRUE		KPNRH_03061	KPNRH_03061	essential		VK055_RS17745	rfaC	essential
ecl8_04221	murG	TRUE		KPNIH1_03585	KPNIH1_03585	TRUE		KPNRH_03086	KPNRH_03086	essential		VK055_RS17750	rfaF	essential
ecl8_04222	ftsW	TRUE		KPNIH1_12785	KPNIH1_12785	TRUE		KPNRH_03097	KPNRH_03097	essential		VK055_RS17755	rfaD	essential
ecl8_04223	murD	TRUE		KPNIH1_27655	KPNIH1_27655	TRUE		KPNRH_03098	KPNRH_03098	essential		VK055_RS17800	secB	essential
ecl8_04224	mraY	TRUE		KPNIH1_12955	KPNIH1_12955	TRUE		KPNRH_03099	lexA_1	essential		VK055_RS17805	gpsA	essential
ecl8_04225	murF	TRUE		KPNIH1_14785	KPNIH1_14785	TRUE		KPNRH_03103	KPNRH_03103	essential		VK055_RS17810	cysE	essential
ecl8_04226	murE	TRUE		KPNIH1_22300	KPNIH1_22300	TRUE		KPNRH_03114	fabI	essential		VK055_RS17945	glyQ	essential
ecl8_04227	ftsI_2	TRUE		KPNIH1_02970	KPNIH1_02970	TRUE		KPNRH_03122	lapB	essential		VK055_RS17950	glyS	essential
ecl8_04228	ftsL	TRUE		KPNIH1_15895	KPNIH1_15895	TRUE		KPNRH_03125	ribA	essential		VK055_RS18400	tusA	essential
ecl8_04229	rsmH	TRUE		KPNIH1_26945	KPNIH1_26945	TRUE		KPNRH_03128	cysB	essential		VK055_RS18430	ftsY	essential
ecl8_04264	lptD	TRUE		KPNIH1_06925	KPNIH1_06925	TRUE		KPNRH_03129	topA_2	essential		VK055_RS18445	rpoH	essential
ecl8_04270	folA	TRUE		KPNIH1_26645	KPNIH1_26645	TRUE		KPNRH_03151	KPNRH_03151	essential		VK055_RS18595	asd	essential
ecl8_04276	dapB	TRUE		KPNIH1_17125	KPNIH1_17125	TRUE		KPNRH_03176	nadE	essential		VK055_RS18755	VK055_RS18755	essential
ecl8_04292	ispH	TRUE		KPNIH1_16590	KPNIH1_16590	TRUE		KPNRH_03199	KPNRH_03199	essential		VK055_RS18890	crp	essential
ecl8_04294	lspA_1	TRUE		KPNIH1_12420	KPNIH1_12420	TRUE		KPNRH_03200	KPNRH_03200	essential		VK055_RS18955	VK055_RS18955	essential
ecl8_04295	ileS	TRUE		KPNIH1_11690	KPNIH1_11690	TRUE		KPNRH_03210	KPNRH_03210	essential		VK055_RS18960	tusD	essential
ecl8_04296	ribF	TRUE		KPNIH1_14645	KPNIH1_14645	TRUE		KPNRH_03211	KPNRH_03211	essential		VK055_RS18965	tusC	essential
ecl8_04297	ecl8_04297	TRUE		KPNIH1_10105	KPNIH1_10105	TRUE		KPNRH_03212	KPNRH_03212	essential		VK055_RS18970	tusB	essential
ecl8_04360	dnaT	TRUE		KPNIH1_14780	KPNIH1_14780	TRUE		KPNRH_03213	KPNRH_03213	essential		VK055_RS18975	rpsL	essential
ecl8_04361	dnaC	TRUE		KPNIH1_09775	KPNIH1_09775	TRUE		KPNRH_03214	KPNRH_03214	essential		VK055_RS18980	rpsG	essential
ecl8_04519	lptG	TRUE		KPNIH1_16615	KPNIH1_16615	TRUE		KPNRH_03215	KPNRH_03215	essential		VK055_RS18985	fusA	essential
ecl8_04520	lptF	TRUE		KPNIH1_04905	KPNIH1_04905	TRUE		KPNRH_03216	KPNRH_03216	essential		VK055_RS19010	rpsJ	essential
ecl8_04523	valS	TRUE		KPNIH1_12510	KPNIH1_12510	TRUE		KPNRH_03217	KPNRH_03217	essential		VK055_RS19015	rplC	essential
ecl8_04569	ppa_2	TRUE		KPNIH1_11250	KPNIH1_11250	TRUE		KPNRH_03220	KPNRH_03220	essential		VK055_RS19020	rplD	essential
ecl8_04594	rpsR	TRUE		KPNIH1_21600	KPNIH1_21600	TRUE		KPNRH_03221	KPNRH_03221	essential		VK055_RS19025	rplW	essential
ecl8_04595	priB	TRUE		KPNIH1_15325	mhpB	TRUE		KPNRH_03227	KPNRH_03227	essential		VK055_RS19030	rplB	essential
ecl8_04596	rpsF	TRUE		KPNIH1_07425	KPNIH1_07425	TRUE		KPNRH_03228	KPNRH_03228	essential		VK055_RS19040	rplV	essential
ecl8_04624	tsaE	TRUE		KPNIH1_11025	KPNIH1_11025	TRUE		KPNRH_03229	KPNRH_03229	essential		VK055_RS19045	rpsC	essential
ecl8_04631	orn	TRUE		KPNIH1_12660	KPNIH1_12660	TRUE		KPNRH_03230	KPNRH_03230	essential		VK055_RS19050	rplP	essential
ecl8_04632	rsgA	TRUE		KPNIH1_07930	KPNIH1_07930	TRUE		KPNRH_03231	KPNRH_03231	essential		VK055_RS19055	rpmC	essential
ecl8_04633	psd	TRUE		KPNIH1_16575	KPNIH1_16575	TRUE		KPNRH_03232	KPNRH_03232	essential		VK055_RS19060	rpsQ	essential
ecl8_04658	groL	TRUE		KPNIH1_25795	KPNIH1_25795	TRUE		KPNRH_03233	KPNRH_03233	essential		VK055_RS19065	rplN	essential
ecl8_04659	groS	TRUE		KPNIH1_02795	KPNIH1_02795	TRUE		KPNRH_03234	KPNRH_03234	essential		VK055_RS19070	rplX	essential
ecl8_04743	ssb	TRUE		KPNIH1_16585	KPNIH1_16585	TRUE		KPNRH_03235	KPNRH_03235	essential		VK055_RS19075	rplE	essential
ecl8_04750	dnaB	TRUE		KPNIH1_12325	KPNIH1_12325	TRUE		KPNRH_03236	KPNRH_03236	essential		VK055_RS19080	rpsN	essential
ecl8_04758	lexA_2	TRUE		KPNIH1_19555	KPNIH1_19555	TRUE		KPNRH_03237	KPNRH_03237	essential		VK055_RS19085	rpsH	essential
ecl8_04760	plsB	TRUE		KPNIH1_18205	KPNIH1_18205	TRUE		KPNRH_03238	KPNRH_03238	essential		VK055_RS19090	rplF	essential
ecl8_04761	ubiA	TRUE		KPNIH1_25445	cysE	TRUE		KPNRH_03239	KPNRH_03239	essential		VK055_RS19095	rplR	essential
ecl8_04811	hemE	TRUE		KPNIH1_16625	KPNIH1_16625	TRUE		KPNRH_03240	KPNRH_03240	essential		VK055_RS19100	rpsE	essential
ecl8_04824	rpoC	TRUE		KPNIH1_12825	KPNIH1_12825	TRUE		KPNRH_03241	KPNRH_03241	essential		VK055_RS19105	rpmD	essential
ecl8_04825	rpoB	TRUE		KPNIH1_12715	KPNIH1_12715	TRUE		KPNRH_03242	KPNRH_03242	essential		VK055_RS19110	rplO	essential
ecl8_04826	rplL	TRUE		KPNIH1_16415	KPNIH1_16415	TRUE		KPNRH_03243	KPNRH_03243	essential		VK055_RS19115	secY	essential
ecl8_04827	rplJ	TRUE		KPNIH1_15205	KPNIH1_15205	TRUE		KPNRH_03244	KPNRH_03244	essential		VK055_RS27335	rpmJ	essential
ecl8_04828	rplA	TRUE		KPNIH1_13645	KPNIH1_13645	TRUE		KPNRH_03245	KPNRH_03245	essential		VK055_RS19120	rpsM	essential
ecl8_04829	rplK	TRUE		KPNIH1_09905	thiK	TRUE		KPNRH_03246	KPNRH_03246	essential		VK055_RS19125	rpsK	essential
ecl8_04830	nusG	TRUE		KPNIH1_09580	KPNIH1_09580	TRUE		KPNRH_03247	KPNRH_03247	essential		VK055_RS19130	rpsD	essential
ecl8_04831	secE	TRUE		KPNIH1_12445	KPNIH1_12445	TRUE		KPNRH_03248	KPNRH_03248	essential		VK055_RS19135	rpoA	essential
ecl8_04837	coaA	TRUE		KPNIH1_17910	KPNIH1_17910	TRUE		KPNRH_03249	KPNRH_03249	essential		VK055_RS19140	rplQ	essential
ecl8_04838	birA_2	TRUE		KPNIH1_08740	KPNIH1_08740	TRUE		KPNRH_03250	KPNRH_03250	essential		VK055_RS19170	VK055_RS19170	essential
ecl8_04839	murB	TRUE		KPNIH1_15440	KPNIH1_15440	TRUE		KPNRH_03251	KPNRH_03251	essential		VK055_RS19175	VK055_RS19175	essential
ecl8_04845	hemG	TRUE		KPNIH1_16030	KPNIH1_16030	TRUE		KPNRH_03252	KPNRH_03252	essential		VK055_RS19195	tsaC	essential
ecl8_04852	ubiD	TRUE		KPNIH1_22395	KPNIH1_22395	TRUE		KPNRH_03253	KPNRH_03253	essential		VK055_RS19215	VK055_RS19215	essential
ecl8_04858	ubiB	TRUE		KPNIH1_12665	KPNIH1_12665	TRUE		KPNRH_03254	dnaT_2	essential		VK055_RS19220	VK055_RS19220	essential
ecl8_04860	ubiE	TRUE		KPNIH1_01095	KPNIH1_01095	TRUE		KPNRH_03255	KPNRH_03255	essential		VK055_RS19225	rrf	essential
ecl8_04885	hemC	TRUE		KPNIH1_22410	KPNIH1_22410	TRUE		KPNRH_03256	KPNRH_03256	essential		VK055_RS19230	VK055_RS19230	essential
ecl8_04886	hemD	TRUE		KPNIH1_09085	pflA	TRUE		KPNRH_03257	KPNRH_03257	essential		VK055_RS19235	rrf	essential
ecl8_04906	rho	TRUE		KPNIH1_12275	KPNIH1_12275	TRUE		KPNRH_03258	KPNRH_03258	essential		VK055_RS19285	accC	essential
ecl8_04913	rep_2	TRUE		KPNIH1_15315	KPNIH1_15315	TRUE		KPNRH_03259	KPNRH_03259	essential		VK055_RS19290	accB	essential
ecl8_04933	murI	TRUE		KPNIH1_02790	KPNIH1_02790	TRUE		KPNRH_03260	recE_2	essential		VK055_RS19325	mreC	essential
ecl8_04959	priA	TRUE		KPNIH1_07155	KPNIH1_07155	TRUE		KPNRH_03261	KPNRH_03261	essential		VK055_RS19465	rplM	essential
ecl8_05018	engB	TRUE		KPNIH1_10670	KPNIH1_10670	TRUE		KPNRH_03262	KPNRH_03262	essential		VK055_RS19470	rpsI	essential
ecl8_05055	glmU	TRUE		KPNIH1_16435	KPNIH1_16435	TRUE		KPNRH_03263	KPNRH_03263	essential		VK055_RS19565	lptB	essential
ecl8_05056	glmS_2	TRUE		KPNIH1_14000	KPNIH1_14000	TRUE		KPNRH_03264	KPNRH_03264	essential		VK055_RS19570	lptA	essential
ecl8_05072	mnmE	TRUE		KPNIH1_07735	KPNIH1_07735	TRUE		KPNRH_03265	KPNRH_03265	essential		VK055_RS19575	lptC	essential
ecl8_05073	yidC	TRUE		KPNIH1_20830	KPNIH1_20830	TRUE		KPNRH_03266	KPNRH_03266	essential		VK055_RS19620	ibaG	essential
ecl8_05074	ecl8_05074	TRUE		KPNIH1_20025	KPNIH1_20025	TRUE		KPNRH_03267	intS_3	essential		VK055_RS19625	murA	essential
ecl8_05075	repB_1	TRUE		KPNIH1_17375	KPNIH1_17375	TRUE		KPNRH_03275	gapA	essential		VK055_RS19635	ispB	essential
ecl8_05094	ecl8_05094	TRUE		KPNIH1_22405	KPNIH1_22405	TRUE		KPNRH_03290	KPNRH_03290	essential		VK055_RS19640	rplU	essential
ecl8_05096	ecl8_05096	TRUE		KPNIH1_12870	KPNIH1_12870	TRUE		KPNRH_03291	KPNRH_03291	essential		VK055_RS19645	rpmA	essential
ecl8_05104	rcsA_2	TRUE		KPNIH1_08005	KPNIH1_08005	TRUE		KPNRH_03313	KPNRH_03313	essential		VK055_RS19655	VK055_RS19655	essential
ecl8_05105	yedA_2	TRUE		KPNIH1_15235	KPNIH1_15235	TRUE		KPNRH_03326	icd	essential		VK055_RS19680	ftsH	essential
ecl8_05106	ecl8_05106	TRUE		KPNIH1_22525	KPNIH1_22525	TRUE		KPNRH_03329	mnmA	essential		VK055_RS19685	folP	essential
ecl8_05170	ecl8_05170	TRUE		KPNIH1_15710	oppD	TRUE		KPNRH_03331	purB	essential		VK055_RS19690	glmM	essential
ecl8_05272	ecl8_05272	TRUE		KPNIH1_13555	KPNIH1_13555	TRUE		KPNRH_03347	lolE	essential		VK055_RS19695	secG	essential
				KPNIH1_14350	KPNIH1_14350	TRUE		KPNRH_03348	lolD	essential		VK055_RS19700	VK055_RS19700	essential
plasmid genes excluded				KPNIH1_21965	KPNIH1_21965	TRUE		KPNRH_03349	lolC	essential		VK055_RS19735	rimP	essential
ecl8_05075	repB_1	TRUE		KPNIH1_12150	KPNIH1_12150	TRUE		KPNRH_03365	holB	essential		VK055_RS19740	nusA	essential
ecl8_05092	ecl8_05092	TRUE		KPNIH1_20030	KPNIH1_20030	TRUE		KPNRH_03366	tmk	essential		VK055_RS19745	infB	essential
ecl8_05094	ecl8_05094	TRUE		KPNIH1_10055	mnmA	TRUE		KPNRH_03370	acpP	essential		VK055_RS26360	rnpB	essential
ecl8_05096	ecl8_05096	TRUE		KPNIH1_14710	KPNIH1_14710	TRUE		KPNRH_03371	fabG_6	essential		VK055_RS20210	VK055_RS20210	essential
ecl8_05104	rcsA_2	TRUE		KPNIH1_14560	rnfD	TRUE		KPNRH_03372	fabD_2	essential		VK055_RS20220	rpoD	essential
ecl8_05105	yedA_2	TRUE		KPNIH1_22540	KPNIH1_22540	TRUE		KPNRH_03373	fabH	essential		VK055_RS20225	dnaG	essential
ecl8_05106	ecl8_05106	TRUE		KPNIH1_14210	KPNIH1_14210	TRUE		KPNRH_03384	murJ	essential		VK055_RS20230	rpsU	essential
ecl8_05170	ecl8_05170	TRUE		KPNIH1_11910	KPNIH1_11910	TRUE		KPNRH_03455	KPNRH_03455	essential		VK055_RS20235	tsaD	essential
ecl8_05205	ecl8_05205	TRUE		KPNIH1_22035	KPNIH1_22035	TRUE		KPNRH_03458	tusE	essential		VK055_RS20295	folB	essential
ecl8_05272	ecl8_05272	TRUE		KPNIH1_10070	KPNIH1_10070	TRUE		KPNRH_03474	fabA	essential		VK055_RS20325	hldE	essential
ecl8_05279	sopB	TRUE		KPNIH1_19465	KPNIH1_19465	TRUE		KPNRH_03496	asnS	essential		VK055_RS20345	ribB	essential
				KPNIH1_07915	tolA	TRUE		KPNRH_03503	mukB	essential		VK055_RS20395	parE	essential
				KPNIH1_11195	KPNIH1_11195	TRUE		KPNRH_03504	mukE	essential		VK055_RS20430	parC	essential
				KPNIH1_14295	KPNIH1_14295	TRUE		KPNRH_03505	mukF	essential		VK055_RS20435	plsC	essential
				KPNIH1_13130	KPNIH1_13130	TRUE		KPNRH_03509	kdsB	essential		VK055_RS20625	VK055_RS20625	essential
				KPNIH1_22800	KPNIH1_22800	TRUE		KPNRH_03512	lpxK	essential		VK055_RS20730	ruvX	essential
				KPNIH1_18680	zipA	TRUE		KPNRH_03513	msbA_1	essential		VK055_RS20765	metK	essential
				KPNIH1_00130	yihA	TRUE		KPNRH_03516	rpsA	essential		VK055_RS20880	VK055_RS20880	essential
				KPNIH1_26240	yidC	TRUE		KPNRH_03517	cmk	essential		VK055_RS20885	fbaA	essential
				KPNIH1_25555	waaA	TRUE		KPNRH_03530	serS	essential		VK055_RS20945	pepP	essential
				KPNIH1_02645	valS	TRUE		KPNRH_03532	lolA	essential		VK055_RS20950	ubiH	essential
				KPNIH1_00975	ubiD	TRUE		KPNRH_03533	KPNRH_03533	essential		VK055_RS28205	VK055_RS28205	essential
				KPNIH1_00945	ubiB	TRUE		KPNRH_03536	cydD	essential		VK055_RS21030	ygfZ	essential
				KPNIH1_14595	tyrS	TRUE		KPNRH_03537	msbA_2	essential		VK055_RS21065	prfB	essential
				KPNIH1_04575	tsf	TRUE		KPNRH_03539	infA	essential		VK055_RS21070	lysS	essential
				KPNIH1_02145	tsaE	TRUE		KPNRH_03622	KPNRH_03622	essential		VK055_RS21700	VK055_RS21700	essential
				KPNIH1_22925	tsaD	TRUE		KPNRH_03624	KPNRH_03624	essential		VK055_RS21705	thyA	essential
				KPNIH1_24065	tsaC	TRUE		KPNRH_03625	KPNRH_03625	essential		VK055_RS21985	VK055_RS21985	essential
				KPNIH1_16390	tsaB	TRUE		KPNRH_03741	gpmA	essential		VK055_RS22210	pyrG	essential
				KPNIH1_19810	trmD	TRUE		KPNRH_03747	KPNRH_03747	essential		VK055_RS22215	VK055_RS22215	essential
				KPNIH1_09870	tmk	TRUE		KPNRH_03751	KPNRH_03751	essential		VK055_RS22290	ftsB	essential
				KPNIH1_04665	tilS	TRUE		KPNRH_03755	KPNRH_03755	essential		VK055_RS22295	ispD	essential
				KPNIH1_15640	thrS	TRUE		KPNRH_03765	cydB_3	essential		VK055_RS22300	ispF	essential
				KPNIH1_05570	thiL	TRUE		KPNRH_03793	pgm	essential		VK055_RS22695	alaS	essential
				KPNIH1_19580	tadA	TRUE		KPNRH_03797	fldA	essential		VK055_RS22700	csrA	essential
				KPNIH1_19480	suhB	TRUE		KPNRH_03798	fur	essential		VK055_RS22705	VK055_RS22705	essential
				KPNIH1_09060	serS	TRUE		KPNRH_03802	glnS	essential		VK055_RS22710	VK055_RS22710	essential
				KPNIH1_24150	secY	TRUE		KPNRH_03809	KPNRH_03809	essential		VK055_RS22715	VK055_RS22715	essential
				KPNIH1_05525	secF	TRUE		KPNRH_03810	KPNRH_03810	essential		VK055_RS23080	nadK	essential
				KPNIH1_01080	secE	TRUE		KPNRH_03811	KPNRH_03811	essential		VK055_RS23085	grpE	essential
				KPNIH1_05520	secD	TRUE		KPNRH_03812	KPNRH_03812	essential		VK055_RS23100	VK055_RS23100	essential
				KPNIH1_04145	secA	TRUE		KPNRH_03813	KPNRH_03813	essential		VK055_RS23105	rpsP	essential
				KPNIH1_04605	rseP	TRUE		KPNRH_03814	KPNRH_03814	essential		VK055_RS23110	rimM	essential
				KPNIH1_22930	rpsU	TRUE		KPNRH_03816	ubiF	essential		VK055_RS23115	trmD	essential
				KPNIH1_24230	rpsS	TRUE		KPNRH_03819	ybeY	essential		VK055_RS23120	rplS	essential
				KPNIH1_19820	rpsP	TRUE		KPNRH_03821	lnt	essential		VK055_RS23180	bamD	essential
				KPNIH1_24185	rpsN	TRUE		KPNRH_03830	leuS	essential		VK055_RS23200	VK055_RS23200	essential
				KPNIH1_24290	rpsL	TRUE		KPNRH_03831	lptE	essential		VK055_RS23205	VK055_RS23205	essential
				KPNIH1_24140	rpsK	TRUE		KPNRH_03832	holA	essential		VK055_RS23210	VK055_RS23210	essential
				KPNIH1_24255	rpsJ	TRUE		KPNRH_03837	mrdA_2	essential		VK055_RS23215	rrf	essential
				KPNIH1_24180	rpsH	TRUE		KPNRH_03838	mrdB	essential		VK055_RS23235	pssA	essential
				KPNIH1_24285	rpsG	TRUE		KPNRH_03841	KPNRH_03841	essential		VK055_RS23285	rpoE	essential
				KPNIH1_24165	rpsE	TRUE		KPNRH_03842	lipB	essential		VK055_RS23305	lepA	essential
				KPNIH1_24135	rpsD	TRUE		KPNRH_03844	lipA	essential		VK055_RS23310	lepB	essential
				KPNIH1_24220	rpsC	TRUE		KPNRH_03945	KPNRH_03945	essential		VK055_RS23320	VK055_RS23320	essential
				KPNIH1_04570	rpsB	TRUE		KPNRH_03946	KPNRH_03946	essential		VK055_RS23325	era	essential
				KPNIH1_19650	rpoE	TRUE		KPNRH_04041	KPNRH_04041	essential		VK055_RS23335	pdxJ	essential
				KPNIH1_01110	rpoB	TRUE		KPNRH_04042	KPNRH_04042	essential		VK055_RS23340	VK055_RS23340	essential
				KPNIH1_24130	rpoA	TRUE		KPNRH_04055	KPNRH_04055	essential		VK055_RS23405	VK055_RS23405	essential
				KPNIH1_26225	rpmH	TRUE		KPNRH_04096	KPNRH_04096	essential		VK055_RS23460	suhB	essential
				KPNIH1_24160	rpmD	TRUE		KPNRH_04097	KPNRH_04097	essential		VK055_RS23470	iscR	essential
				KPNIH1_24210	rpmC	TRUE		KPNRH_04098	KPNRH_04098	essential		VK055_RS23475	VK055_RS23475	essential
				KPNIH1_25580	rpmB	TRUE		KPNRH_04101	KPNRH_04101	essential		VK055_RS23480	iscU	essential
				KPNIH1_23565	rpmA	TRUE		KPNRH_04104	KPNRH_04104	essential		VK055_RS23485	iscA	essential
				KPNIH1_24195	rplX	TRUE		KPNRH_04107	KPNRH_04107	essential		VK055_RS23490	hscB	essential
				KPNIH1_24240	rplW	TRUE		KPNRH_04110	KPNRH_04110	essential		VK055_RS23495	hscA	essential
				KPNIH1_24225	rplV	TRUE		KPNRH_04111	folD	essential		VK055_RS23555	ispG	essential
				KPNIH1_23570	rplU	TRUE		KPNRH_04113	cysS	essential		VK055_RS23560	hisS	essential
				KPNIH1_15625	rplT	TRUE		KPNRH_04115	lpxH	essential		VK055_RS23575	der	essential
				KPNIH1_19805	rplS	TRUE		KPNRH_04137	hemH	essential		VK055_RS23620	guaA	essential
				KPNIH1_24170	rplR	TRUE		KPNRH_04138	adk	essential		VK055_RS23750	hda	essential
				KPNIH1_24125	rplQ	TRUE		KPNRH_04142	dnaX	essential		VK055_RS23790	dapA	essential
				KPNIH1_24215	rplP	TRUE		KPNRH_04143	KPNRH_04143	essential		VK055_RS23825	dapE	essential
				KPNIH1_24155	rplO	TRUE		KPNRH_04151	acrA	essential		VK055_RS24075	zipA	essential
				KPNIH1_24200	rplN	TRUE		KPNRH_04152	acrB_3	essential		VK055_RS24080	ligA	essential
				KPNIH1_01105	rplL	TRUE		KPNRH_04177	KPNRH_04177	essential		VK055_RS24100	VK055_RS24100	essential
				KPNIH1_01100	rplJ	TRUE		KPNRH_04225	ispA	essential		VK055_RS24105	VK055_RS24105	essential
				KPNIH1_24175	rplF	TRUE		KPNRH_04226	dxs_3	essential		VK055_RS24120	gltX	essential
				KPNIH1_24190	rplE	TRUE		KPNRH_04230	nusB	essential		VK055_RS24135	VK055_RS24135	essential
				KPNIH1_24245	rplD	TRUE		KPNRH_04231	ribE	essential		VK055_RS24315	fabB	essential
				KPNIH1_24250	rplC	TRUE		KPNRH_04232	ribD	essential		VK055_RS24350	accD	essential
				KPNIH1_24235	rplB	TRUE		KPNRH_04238	secF	essential		VK055_RS24355	folC	essential
				KPNIH1_03720	ribF	TRUE		KPNRH_04239	secD	essential		VK055_RS24375	VK055_RS24375	essential
				KPNIH1_05560	ribH	TRUE		KPNRH_04283	hemB	essential		VK055_RS24680	nrdB	essential
				KPNIH1_05555	ribD	TRUE		KPNRH_04373	gmhA	essential		VK055_RS24685	nrdA	essential
				KPNIH1_10800	ribA	TRUE		KPNRH_04389	KPNRH_04389	essential		VK055_RS24690	VK055_RS24690	essential
				KPNIH1_04580	pyrH	TRUE		KPNRH_04390	KPNRH_04390	essential		VK055_RS24695	gyrA	essential
				KPNIH1_15950	pth	TRUE		KPNRH_04391	KPNRH_04391	essential		VK055_RS24800	VK055_RS24800	essential
				KPNIH1_02100	psd	TRUE		KPNRH_04392	KPNRH_04392	essential		VK055_RS24830	rplY	essential
				KPNIH1_15930	prs	TRUE		KPNRH_04393	KPNRH_04393	essential		VK055_RS24975	folE	essential
				KPNIH1_04700	proS	TRUE		KPNRH_04394	KPNRH_04394	essential		VK055_RS25445	cpsG	essential
				KPNIH1_21855	prfB	TRUE		KPNRH_04395	KPNRH_04395	essential		VK055_RS25450	VK055_RS25450	essential
				KPNIH1_15910	prfA	TRUE		KPNRH_04402	proS	essential		VK055_RS25465	VK055_RS25465	essential
				KPNIH1_02410	ppa	TRUE		KPNRH_04409	tilS	essential		VK055_RS25960	VK055_RS25960	essential
				KPNIH1_00125	polA	TRUE		KPNRH_04412	accA	essential		VK055_RS25975	VK055_RS25975	essential
				KPNIH1_22735	plsC	TRUE		KPNRH_04413	dnaE	essential		VK055_RS26285	VK055_RS26285	essential
				KPNIH1_01435	plsB	TRUE		KPNRH_04415	lpxB	essential		VK055_RS26290	VK055_RS26290	essential
				KPNIH1_15615	pheT	TRUE		KPNRH_04416	lpxA	essential		VK055_RS26295	VK055_RS26295	essential
				KPNIH1_15620	pheS	TRUE		KPNRH_04417	fabZ	essential		VK055_RS26300	VK055_RS26300	essential
				KPNIH1_16825	pgsA	TRUE		KPNRH_04418	lpxD	essential		VK055_RS27650	VK055_RS27650	essential
				KPNIH1_22025	pgk	TRUE		KPNRH_04420	bamA_1	essential		VK055_RS28345	VK055_RS28345	essential
				KPNIH1_22775	parE	TRUE		KPNRH_04421	rseP	essential
				KPNIH1_22740	parC	TRUE		KPNRH_04422	cdsA	essential
				KPNIH1_23555	obgE	TRUE		KPNRH_04424	dxr	essential
				KPNIH1_19845	ppnK	TRUE		KPNRH_04425	frr	essential
				KPNIH1_10545	nadE	TRUE		KPNRH_04426	pyrH	essential
				KPNIH1_07535	nadD	TRUE		KPNRH_04427	tsf	essential
				KPNIH1_09790	murJ	TRUE		KPNRH_04428	rpsB	essential
				KPNIH1_04105	murG	TRUE		KPNRH_04429	KPNRH_04429	essential
				KPNIH1_04085	murF	TRUE		KPNRH_04437	mtnN	essential
				KPNIH1_04095	murD	TRUE		KPNRH_04440	erpA	essential
				KPNIH1_04110	murC	TRUE		KPNRH_04442	hemL	essential
				KPNIH1_23585	murA	TRUE		KPNRH_04484	KPNRH_04484	essential
				KPNIH1_09180	mukF	TRUE		KPNRH_04485	KPNRH_04485	essential
				KPNIH1_09185	mukE	TRUE		KPNRH_04490	acnB	essential
				KPNIH1_09190	mukB	TRUE		KPNRH_04494	lpdA	essential
				KPNIH1_09140	msbA	TRUE		KPNRH_04495	aceF	essential
				KPNIH1_04090	mraY	TRUE		KPNRH_04496	aceE	essential
				KPNIH1_16370	minE	TRUE		KPNRH_04514	secA	essential
				KPNIH1_03730	lspA	TRUE		KPNRH_04516	lpxC	essential
				KPNIH1_09145	lpxK	TRUE		KPNRH_04517	ftsZ	essential
				KPNIH1_06140	lpxH	TRUE		KPNRH_04518	ftsA_2	essential
				KPNIH1_04620	lpxD	TRUE		KPNRH_04521	murC	essential
				KPNIH1_04135	lpxC	TRUE		KPNRH_04522	murG	essential
				KPNIH1_04630	lpxA	TRUE		KPNRH_04524	murD	essential
				KPNIH1_02665	lptG	TRUE		KPNRH_04525	mraY	essential
				KPNIH1_03885	lptD	TRUE		KPNRH_04526	murF	essential
				KPNIH1_23635	lptC	TRUE		KPNRH_04527	murE	essential
				KPNIH1_23640	lptA	TRUE		KPNRH_04528	ftsI_2	essential
				KPNIH1_09965	lolE	TRUE		KPNRH_04567	lptD	essential
				KPNIH1_09960	lolD	TRUE		KPNRH_04579	KPNRH_04579	essential
				KPNIH1_09955	lolC	TRUE		KPNRH_04580	dapB	essential
				KPNIH1_15920	lolB	TRUE		KPNRH_04596	ispH	essential
				KPNIH1_09050	lolA	TRUE		KPNRH_04598	lspA	essential
				KPNIH1_18675	ligA	TRUE		KPNRH_04599	ileS	essential
				KPNIH1_21425	lgt	TRUE		KPNRH_04600	ribF	essential
				KPNIH1_01445	lexA	TRUE		KPNRH_04601	KPNRH_04601	essential
				KPNIH1_07550	leuS	TRUE		KPNRH_04606	dnaK_2	essential
				KPNIH1_19625	lepB	TRUE		KPNRH_04651	KPNRH_04651	essential
				KPNIH1_09160	kdsB	TRUE		KPNRH_04665	dnaT_3	essential
				KPNIH1_15890	kdsA	TRUE		KPNRH_04666	dnaC	essential
				KPNIH1_04595	ispU	TRUE		KPNRH_04738	KPNRH_04738	essential
				KPNIH1_03740	ispH	TRUE		KPNRH_04739	KPNRH_04739	essential
				KPNIH1_19385	ispG	TRUE		KPNRH_04740	KPNRH_04740	essential
				KPNIH1_20835	ispF	TRUE		KPNRH_04741	KPNRH_04741	essential
				KPNIH1_15925	ispE	TRUE		KPNRH_04742	KPNRH_04742	essential
				KPNIH1_20840	ispD	TRUE		KPNRH_04790	KPNRH_04790	essential
				KPNIH1_23575	ispB	TRUE		KPNRH_04810	lptG	essential
				KPNIH1_15635	infC	TRUE		KPNRH_04811	lptF	essential
				KPNIH1_09015	infA	TRUE		KPNRH_04814	valS	essential
				KPNIH1_03725	ileS	TRUE		KPNRH_04862	ppa_2	essential
				KPNIH1_09875	holB	TRUE		KPNRH_04886	priB	essential
				KPNIH1_07540	holA	TRUE		KPNRH_04887	rpsF	essential
				KPNIH1_04505	hemL	TRUE		KPNRH_04918	KPNRH_04918	essential
				KPNIH1_06020	hemH	TRUE		KPNRH_04920	KPNRH_04920	essential
				KPNIH1_01010	hemG	TRUE		KPNRH_04922	orn	essential
				KPNIH1_00805	hemD	TRUE		KPNRH_04923	rsgA	essential
				KPNIH1_00810	hemC	TRUE		KPNRH_04924	psd	essential
				KPNIH1_05295	hemB	TRUE		KPNRH_04936	efp	essential
				KPNIH1_15915	hemA	TRUE		KPNRH_04939	KPNRH_04939	essential
				KPNIH1_26205	gyrB	TRUE		KPNRH_04950	groL	essential
				KPNIH1_01960	groES	TRUE		KPNRH_04951	groS	essential
				KPNIH1_01965	groEL	TRUE		KPNRH_04960	KPNRH_04960	essential
				KPNIH1_25670	gmk	TRUE		KPNRH_04961	KPNRH_04961	essential
				KPNIH1_25295	glyQ	TRUE		KPNRH_04962	KPNRH_04962	essential
				KPNIH1_18635	gltX	TRUE		KPNRH_04973	KPNRH_04973	essential
				KPNIH1_26330	glmU	TRUE		KPNRH_04974	KPNRH_04974	essential
				KPNIH1_26325	glmS	TRUE		KPNRH_05000	KPNRH_05000	essential
				KPNIH1_24280	fusA	TRUE		KPNRH_05030	KPNRH_05030	essential
				KPNIH1_04130	ftsZ	TRUE		KPNRH_05039	KPNRH_05039	essential
				KPNIH1_24815	ftsY	TRUE		KPNRH_05049	dnaB_3	essential
				KPNIH1_04100	ftsW	TRUE		KPNRH_05057	lexA_2	essential
				KPNIH1_04120	ftsQ	TRUE		KPNRH_05059	plsB	essential
				KPNIH1_04070	ftsL	TRUE		KPNRH_05098	KPNRH_05098	essential
				KPNIH1_04075	ftsI	TRUE		KPNRH_05099	KPNRH_05099	essential
				KPNIH1_23530	ftsH	TRUE		KPNRH_05100	KPNRH_05100	essential
				KPNIH1_20845	ftsB	TRUE		KPNRH_05101	KPNRH_05101	essential
				KPNIH1_04125	ftsA	TRUE		KPNRH_05102	KPNRH_05102	essential
				KPNIH1_04585	frr	TRUE		KPNRH_05114	hemE	essential
				KPNIH1_24090	fmt	TRUE		KPNRH_05128	rpoC	essential
				KPNIH1_19825	ffh	TRUE		KPNRH_05129	rpoB	essential
				KPNIH1_04625	fabZ	TRUE		KPNRH_05130	rplL	essential
				KPNIH1_10855	fabI	TRUE		KPNRH_05131	rplJ	essential
				KPNIH1_09845	fabG	TRUE		KPNRH_05132	rplA	essential
				KPNIH1_09840	fabD	TRUE		KPNRH_05133	rplK	essential
				KPNIH1_18450	fabB	TRUE		KPNRH_05134	nusG	essential
				KPNIH1_09330	fabA	TRUE		KPNRH_05135	secE	essential
				KPNIH1_04515	erpA	TRUE		KPNRH_05138	KPNRH_05138	essential
				KPNIH1_19615	era	TRUE		KPNRH_05139	KPNRH_05139	essential
				KPNIH1_05585	dxs	TRUE		KPNRH_05140	KPNRH_05140	essential
				KPNIH1_04590	dxr	TRUE		KPNRH_05143	murB	essential
				KPNIH1_05995	dnaX	TRUE		KPNRH_05144	KPNRH_05144	essential
				KPNIH1_26215	dnaN	TRUE		KPNRH_05145	KPNRH_05145	essential
				KPNIH1_04645	dnaE	TRUE		KPNRH_05146	KPNRH_05146	essential
				KPNIH1_03400	dnaC	TRUE		KPNRH_05147	KPNRH_05147	essential
				KPNIH1_01485	dnaB	TRUE		KPNRH_05148	KPNRH_05148	essential
				KPNIH1_26220	dnaA	TRUE		KPNRH_05149	KPNRH_05149	essential
				KPNIH1_25590	dfp	TRUE		KPNRH_05150	hemG	essential
				KPNIH1_19365	der	TRUE		KPNRH_05157	ubiD	essential
				KPNIH1_23760	degS	TRUE		KPNRH_05163	ubiB	essential
				KPNIH1_18915	dapE	TRUE		KPNRH_05165	ubiE_2	essential
				KPNIH1_04555	dapD	TRUE		KPNRH_05191	hemD	essential
				KPNIH1_03820	dapB	TRUE		KPNRH_05196	KPNRH_05196	essential
				KPNIH1_18950	dapA	TRUE		KPNRH_05197	KPNRH_05197	essential
				KPNIH1_06150	cysS	TRUE		KPNRH_05198	KPNRH_05198	essential
				KPNIH1_25565	coaD	TRUE		KPNRH_05199	KPNRH_05199	essential
				KPNIH1_04600	cdsA	TRUE		KPNRH_05213	rho	essential
				KPNIH1_22860	cca	TRUE		KPNRH_05218	KPNRH_05218	essential
				KPNIH1_19750	bamD	TRUE		KPNRH_05220	rep	essential
				KPNIH1_04610	bamA	TRUE		KPNRH_05234	KPNRH_05234	essential
				KPNIH1_16675	aspS	TRUE		KPNRH_05235	KPNRH_05235	essential
				KPNIH1_09220	asnS	TRUE		KPNRH_05236	KPNRH_05236	essential
				KPNIH1_24660	asd	TRUE		KPNRH_05237	KPNRH_05237	essential
				KPNIH1_16715	argS	TRUE		KPNRH_05238	KPNRH_05238	essential
				KPNIH1_20435	alaS	TRUE		KPNRH_05239	KPNRH_05239	essential
				KPNIH1_06015	adk	TRUE		KPNRH_05240	KPNRH_05240	essential
				KPNIH1_19600	acpS	TRUE		KPNRH_05268	priA	essential
				KPNIH1_09850	acpP	TRUE		KPNRH_05332	polA	essential
				KPNIH1_18415	accD	TRUE		KPNRH_05339	KPNRH_05339	essential
				KPNIH1_23870	accC	TRUE		KPNRH_05340	KPNRH_05340	essential
				KPNIH1_23865	accB	TRUE		KPNRH_05341	KPNRH_05341	essential
				KPNIH1_22175	KPNIH1_22175	TRUE		KPNRH_05342	KPNRH_05342	essential
				KPNIH1_01430	ubiA	TRUE		KPNRH_05343	KPNRH_05343	essential
				KPNIH1_10775	KPNIH1_10775	TRUE		KPNRH_05361	atpB	essential
				KPNIH1_25680	KPNIH1_25680	TRUE		KPNRH_05362	atpE	essential
				KPNIH1_02300	rpsR	TRUE		KPNRH_05365	atpA	essential
				KPNIH1_09125	rpsA	TRUE		KPNRH_05367	atpD	essential
				KPNIH1_22940	KPNIH1_22940	TRUE		KPNRH_05368	atpC	essential
				KPNIH1_01115	KPNIH1_01115	TRUE		KPNRH_05369	glmU	essential
				KPNIH1_23740	KPNIH1_23740	TRUE		KPNRH_05370	glmS_2	essential
				KPNIH1_14730	KPNIH1_14730	TRUE		KPNRH_05377	KPNRH_05377	essential
				KPNIH1_22825	ribB	TRUE		KPNRH_05389	yidC	essential
				KPNIH1_20915	pyrG	TRUE		KPNRH_05390	KPNRH_05390	essential
				KPNIH1_10045	KPNIH1_10045	TRUE
				KPNIH1_19700	pssA	TRUE
				KPNIH1_01085	nusG	TRUE
				KPNIH1_23475	nusA	TRUE
				KPNIH1_18105	KPNIH1_18105	TRUE
				KPNIH1_18100	KPNIH1_18100	TRUE
				KPNIH1_04080	murE	TRUE
				KPNIH1_01040	murB	TRUE
				KPNIH1_22140	KPNIH1_22140	TRUE
				KPNIH1_17685	metG	TRUE
				KPNIH1_04635	lpxB	TRUE
				KPNIH1_07545	KPNIH1_07545	TRUE
				KPNIH1_23645	KPNIH1_23645	TRUE
				KPNIH1_07590	lnt	TRUE
				KPNIH1_23470	infB	TRUE
				KPNIH1_19380	hisS	TRUE
				KPNIH1_18090	KPNIH1_18090	TRUE
				KPNIH1_19840	KPNIH1_19840	TRUE
				KPNIH1_25290	KPNIH1_25290	TRUE
				KPNIH1_07690	KPNIH1_07690	TRUE
				KPNIH1_23520	glmM	TRUE
				KPNIH1_24810	KPNIH1_24810	TRUE
				KPNIH1_04360	KPNIH1_04360	TRUE
				KPNIH1_06160	KPNIH1_06160	TRUE
				KPNIH1_18410	KPNIH1_18410	TRUE
				KPNIH1_07715	KPNIH1_07715	TRUE
				KPNIH1_20910	eno	TRUE
				KPNIH1_22935	dnaG	TRUE
				KPNIH1_24085	KPNIH1_24085	TRUE
				KPNIH1_20430	KPNIH1_20430	TRUE
				KPNIH1_04165	coaE	TRUE
				KPNIH1_01050	KPNIH1_01050	TRUE
				KPNIH1_01045	KPNIH1_01045	TRUE
				KPNIH1_04650	KPNIH1_04650	TRUE

## Sheet: blastN, homolog matching
	4-way blastN output (e-value > 1e-10, percent identity >90, percent length >30)					Gene essential?
	KPNIH1 (NZ_CP008827)	RH201207 (NZ_FR997879)	ATCC43816 (NZ_CP009208)	ecl8_fa3 (ecl8)		KPNIH1 (NZ_CP008827)	RH201207 (NZ_FR997879)	ATCC43816 (NZ_CP009208)	ecl8_fa3 (ecl8)
1	KPNIH1_00005	KPNRH_05357	VK055_RS16800	ecl8_05043		No	No	No	No
2	KPNIH1_00010	KPNRH_05356	VK055_RS16795	ecl8_05042		No	No	No	No
3	KPNIH1_00015	KPNRH_05355	VK055_RS16790	ecl8_05041		No	No	No	No
4	KPNIH1_00020	KPNRH_05354	VK055_RS16785	ecl8_05040		No	No	No	No
5	KPNIH1_00025	KPNRH_05353	VK055_RS16780	ecl8_05039		No	No	No	No
6	KPNIH1_00030	KPNRH_05352	VK055_RS16775	ecl8_05038		No	No	No	No
7	KPNIH1_00035	KPNRH_05351	VK055_RS16770	ecl8_05037		No	No	No	No
8	KPNIH1_00040	KPNRH_05350	VK055_RS16765	ecl8_05036		No	No	No	No
9	KPNIH1_00045	KPNRH_05349	VK055_RS16760	ecl8_05035		No	No	No	No
10	KPNIH1_00050	KPNRH_05348	VK055_RS16755	ecl8_05034		No	No	No	No
11	KPNIH1_00055	KPNRH_05347	VK055_RS16750	ecl8_05033		No	No	No	No
12	KPNIH1_00060	KPNRH_05346	VK055_RS16745	ecl8_05032		No	No	No	No
13	KPNIH1_00065	KPNRH_05345	VK055_RS16740	ecl8_05031		No	No	No	No
14	KPNIH1_00070	KPNRH_05344	VK055_RS16735	ecl8_05030		No	No	No	No
15	KPNIH1_00095	KPNRH_05338	VK055_RS16710	ecl8_05025		Yes	No	No	No
16	KPNIH1_00100	KPNRH_05337	VK055_RS16705	ecl8_05024		No	No	No	No
17	KPNIH1_00105	KPNRH_05336	VK055_RS16700	ecl8_05023		Yes	No	No	No
18	KPNIH1_00110	KPNRH_05335	VK055_RS16695	ecl8_05022		No	No	No	No
19	KPNIH1_00115	KPNRH_05334	VK055_RS16690	ecl8_05021		No	No	No	No
20	KPNIH1_00120	KPNRH_05333	VK055_RS16685	ecl8_05020		No	No	No	No
21	KPNIH1_00125	KPNRH_05332	VK055_RS16680	ecl8_05019		Yes	Yes	No	Yes
22	KPNIH1_00130	KPNRH_05330	VK055_RS16675	ecl8_05018		Yes	No	Yes	Yes
23	KPNIH1_00135	KPNRH_05328	VK055_RS16670	ecl8_05017		No	No	No	No
24	KPNIH1_00140	KPNRH_05327	VK055_RS16665	ecl8_05016		No	No	No	No
25	KPNIH1_00145	KPNRH_05326	VK055_RS16660	ecl8_05015		No	No	No	No
26	KPNIH1_00150	KPNRH_05325	VK055_RS16655	ecl8_05014		No	No	No	No
27	KPNIH1_00155	KPNRH_05324	VK055_RS16650	ecl8_05013		No	No	No	No
28	KPNIH1_00160	KPNRH_05323	VK055_RS16640	ecl8_05012		No	No	No	No
29	KPNIH1_00165	KPNRH_05322	VK055_RS16635	ecl8_05011		No	No	No	No
30	KPNIH1_00170	KPNRH_05321	VK055_RS16630	ecl8_05010		No	No	No	No
31	KPNIH1_00175	KPNRH_05320	VK055_RS16625	ecl8_05009		No	No	No	No
32	KPNIH1_00180	KPNRH_05319	VK055_RS16620	ecl8_05008		No	No	No	No
33	KPNIH1_00185	KPNRH_05318	VK055_RS16615	ecl8_05007		No	No	No	No
34	KPNIH1_00190	KPNRH_05317	VK055_RS16610	ecl8_05006		No	No	No	No
35	KPNIH1_00195	KPNRH_05316	VK055_RS16605	ecl8_05005		No	No	No	No
36	KPNIH1_00200	KPNRH_05315	VK055_RS16600	ecl8_05004		No	No	No	No
37	KPNIH1_00205	KPNRH_05314	VK055_RS16595	ecl8_05003		No	No	No	No
38	KPNIH1_00210	KPNRH_05313	VK055_RS16590	ecl8_05002		No	No	No	No
39	KPNIH1_00215;KPNIH1_00220;KPNIH1_14035;KPNIH1_14040	KPNRH_05312;KPNRH_02476;KPNRH_02477;KPNRH_02478;KPNRH_05310;KPNRH_05311	VK055_RS03105;VK055_RS16585	ecl8_02340;ecl8_02339;ecl8_05001;ecl8_05000		No	Yes	No	No
40	KPNIH1_00225	KPNRH_05309	VK055_RS16575	ecl8_04999		No	No	No	No
41	KPNIH1_00230	KPNRH_05308	VK055_RS16570	ecl8_04998		No	No	No	No
42	KPNIH1_00235	KPNRH_05307		ecl8_04997		No	No	No	No
43	KPNIH1_00240	KPNRH_05306		ecl8_04996		No	No	No	No
44	KPNIH1_00245	KPNRH_05305		ecl8_04995		No	No	No	No
45	KPNIH1_00250	KPNRH_05304		ecl8_04994		No	No	No	No
46	KPNIH1_00255	KPNRH_05303		ecl8_04993		No	No	No	No
47	KPNIH1_00260	KPNRH_05302		ecl8_04992		No	No	No	No
48	KPNIH1_00265	KPNRH_05301		ecl8_04991		No	No	No	No
49	KPNIH1_00270	KPNRH_05300	VK055_RS16565	ecl8_04990		Yes	No	No	No
50	KPNIH1_00275	KPNRH_05299	VK055_RS16560	ecl8_04989		No	No	No	No
51	KPNIH1_00280	KPNRH_05298	VK055_RS16555	ecl8_04988		No	No	No	No
52	KPNIH1_00285	KPNRH_05297	VK055_RS16550	ecl8_04987		No	No	No	No
53	KPNIH1_00290	KPNRH_05296	VK055_RS16545	ecl8_04986		No	No	No	No
54	KPNIH1_00295	KPNRH_05295	VK055_RS16540	ecl8_04985		No	No	No	No
55	KPNIH1_00300	KPNRH_05294	VK055_RS16535	ecl8_04984		No	No	No	No
56	KPNIH1_00305	KPNRH_05293	VK055_RS16530	ecl8_04983		No	No	No	No
57	KPNIH1_00310	KPNRH_05292	VK055_RS16525	ecl8_04982		No	No	No	No
58	KPNIH1_00315	KPNRH_05291	VK055_RS16520	ecl8_04981		No	No	No	No
59	KPNIH1_00320	KPNRH_05290	VK055_RS16515	ecl8_04980		No	No	No	No
60	KPNIH1_00325	KPNRH_05289	VK055_RS16510	ecl8_04979		No	No	No	No
61	KPNIH1_00330	KPNRH_05288	VK055_RS16505	ecl8_04978		No	No	No	No
62	KPNIH1_00335	KPNRH_05287	VK055_RS16500	ecl8_04977		No	No	No	No
63	KPNIH1_00340	KPNRH_05286	VK055_RS16495	ecl8_04976		No	No	No	No
64	KPNIH1_00345	KPNRH_05285	VK055_RS16490	ecl8_04975		No	No	No	No
65	KPNIH1_00350	KPNRH_05284	VK055_RS16485	ecl8_04974		No	No	No	No
66	KPNIH1_00355	KPNRH_05283	VK055_RS16480	ecl8_04973		No	No	No	No
67	KPNIH1_00360	KPNRH_05282	VK055_RS16475	ecl8_04972		No	No	No	No
68	KPNIH1_00365	KPNRH_05281	VK055_RS16470	ecl8_04971		No	No	No	No
69	KPNIH1_00370	KPNRH_05280	VK055_RS16465	ecl8_04970		No	No	No	No
70	KPNIH1_00375	KPNRH_05279	VK055_RS16460	ecl8_04969		No	No	No	No
71	KPNIH1_00380	KPNRH_05278	VK055_RS16455	ecl8_04968		No	No	No	No
72	KPNIH1_00385	KPNRH_05277	VK055_RS16450	ecl8_04967		No	No	No	No
73	KPNIH1_00390	KPNRH_05276	VK055_RS16445	ecl8_04966		No	No	No	No
74	KPNIH1_00395	KPNRH_05275	VK055_RS16440	ecl8_04965		No	No	No	No
75	KPNIH1_00400	KPNRH_05274	VK055_RS16435	ecl8_04964		No	No	No	No
76	KPNIH1_00405	KPNRH_05273	VK055_RS16430	ecl8_04963		No	No	No	No
77	KPNIH1_00410	KPNRH_05272	VK055_RS16425	ecl8_04962		No	No	No	No
78	KPNIH1_00415	KPNRH_05270	VK055_RS16420	ecl8_04961		No	No	No	No
79	KPNIH1_00420	KPNRH_05269	VK055_RS16415	ecl8_04960		No	No	No	No
80	KPNIH1_00425	KPNRH_05268	VK055_RS16405	ecl8_04959		Yes	Yes	Yes	Yes
81	KPNIH1_00430	KPNRH_05267	VK055_RS16400	ecl8_04958		No	No	No	No
82	KPNIH1_00435	KPNRH_05266	VK055_RS16395	ecl8_04957		No	No	No	No
83	KPNIH1_00440	KPNRH_05265	VK055_RS16390	ecl8_04956		No	No	No	No
84	KPNIH1_00445	KPNRH_05264	VK055_RS16385	ecl8_04955		No	No	No	No
85	KPNIH1_00450	KPNRH_05263	VK055_RS16380	ecl8_04954		No	No	No	No
86	KPNIH1_00455	KPNRH_05262	VK055_RS16375	ecl8_04953		No	No	No	No
87	KPNIH1_00460	KPNRH_05261	VK055_RS16370	ecl8_04952		No	No	No	No
88	KPNIH1_00465	KPNRH_05260	VK055_RS16365	ecl8_04951		No	No	No	No
89	KPNIH1_00470	KPNRH_05259	VK055_RS16360	ecl8_04950		No	No	No	No
90	KPNIH1_00475	KPNRH_05258	VK055_RS16355	ecl8_04949		No	No	No	No
91	KPNIH1_00480	KPNRH_05257	VK055_RS16350	ecl8_04948		No	No	No	No
92	KPNIH1_00485	KPNRH_05256	VK055_RS16345	ecl8_04947		No	No	No	No
93	KPNIH1_00490	KPNRH_05255	VK055_RS16340	ecl8_04946		No	No	No	No
94	KPNIH1_00495	KPNRH_05254	VK055_RS16335	ecl8_04945		No	No	No	No
95	KPNIH1_00500	KPNRH_05253	VK055_RS16330	ecl8_04944		No	No	No	No
96	KPNIH1_00505	KPNRH_05252	VK055_RS16325	ecl8_04943		No	No	No	No
97	KPNIH1_00510	KPNRH_05251	VK055_RS16320	ecl8_04942		No	No	No	No
98	KPNIH1_00515	KPNRH_05250	VK055_RS16315	ecl8_04941		No	No	No	No
99	KPNIH1_00520	KPNRH_05249	VK055_RS16310	ecl8_04940		No	No	No	No
100	KPNIH1_00525	KPNRH_05248	VK055_RS16305	ecl8_04939		No	No	No	No
101	KPNIH1_00530	KPNRH_05247	VK055_RS16300	ecl8_04938		No	No	No	No
102	KPNIH1_00535	KPNRH_05246	VK055_RS16295	ecl8_04937		No	No	No	No
103	KPNIH1_00540	KPNRH_05245	VK055_RS16290	ecl8_04936		No	No	No	No
104	KPNIH1_00545	KPNRH_05244	VK055_RS16285	ecl8_04935		No	No	No	No
105	KPNIH1_00555	KPNRH_05242	VK055_RS16280	ecl8_04934		No	No	No	No
106	KPNIH1_00560	KPNRH_05241	VK055_RS16275	ecl8_04933		No	No	Yes	Yes
107	KPNIH1_00565;KPNIH1_01015;KPNIH1_01230;KPNIH1_03025;KPNIH1_04735;KPNIH1_19730;KPNIH1_24045					No	No	No	No
108	KPNIH1_00605	KPNRH_05231	VK055_RS16230	ecl8_04924		No	No	No	No
109	KPNIH1_00610	KPNRH_05230	VK055_RS16225	ecl8_04923		No	No	No	No
110	KPNIH1_00615	KPNRH_05229	VK055_RS16215	ecl8_04922		No	No	No	No
111	KPNIH1_00620	KPNRH_05228	VK055_RS16210	ecl8_04921		No	No	No	No
112	KPNIH1_00625	KPNRH_05227	VK055_RS16205	ecl8_04920		No	No	No	No
113	KPNIH1_00630	KPNRH_05226	VK055_RS16200	ecl8_04919		No	No	No	No
114	KPNIH1_00635	KPNRH_05225	VK055_RS16195	ecl8_04918		No	No	No	No
115	KPNIH1_00640	KPNRH_05224	VK055_RS16190	ecl8_04917		No	No	No	No
116	KPNIH1_00645	KPNRH_05223	VK055_RS16185	ecl8_04916		No	No	No	No
117	KPNIH1_00650	KPNRH_05222	VK055_RS16180	ecl8_04915		No	No	No	No
118	KPNIH1_00655	KPNRH_05221	VK055_RS16175	ecl8_04914		No	No	No	No
119	KPNIH1_00660	KPNRH_05220	VK055_RS16170	ecl8_04913		No	Yes	Yes	Yes
120	KPNIH1_00665	KPNRH_05219	VK055_RS16165	ecl8_04912		No	No	No	No
121	KPNIH1_00675;KPNIH1_02020;KPNIH1_10905;KPNIH1_12545;KPNIH1_13870;KPNIH1_16010;KPNIH1_17355;KPNIH1_21240;KPNIH1_22325;KPNIH1_25635	KPNRH_01990;KPNRH_02082;KPNRH_02280;KPNRH_02494;KPNRH_02496;KPNRH_02753;KPNRH_03004;KPNRH_03061;KPNRH_03313;KPNRH_04939;KPNRH_05030;KPNRH_05039;KPNRH_05218;KPNRH_05377				No	Yes	No	No
122	KPNIH1_00680	KPNRH_05217	VK055_RS16155	ecl8_04910		No	No	No	No
123	KPNIH1_00685	KPNRH_05216	VK055_RS16150	ecl8_04909		No	No	No	No
124	KPNIH1_00690	KPNRH_05215	VK055_RS16145	ecl8_04908		No	No	No	No
125	KPNIH1_00695	KPNRH_05214	VK055_RS16140	ecl8_04907		No	No	No	No
126	KPNIH1_00700	KPNRH_05213	VK055_RS16135	ecl8_04906		No	Yes	Yes	Yes
127	KPNIH1_00705	KPNRH_05212	VK055_RS16130	ecl8_04905		No	No	No	No
128	KPNIH1_00710	KPNRH_05211	VK055_RS16125	ecl8_04904		No	No	No	No
129	KPNIH1_00715	KPNRH_05210	VK055_RS16120	ecl8_04903		No	No	No	No
130	KPNIH1_00720	KPNRH_05209	VK055_RS16115	ecl8_04902		No	No	No	No
131	KPNIH1_00725	KPNRH_05208	VK055_RS16110	ecl8_04901		No	No	No	No
132	KPNIH1_00730	KPNRH_05207	VK055_RS16105	ecl8_04900		No	No	No	No
133	KPNIH1_00735	KPNRH_05206	VK055_RS16100	ecl8_04899		No	No	No	No
134	KPNIH1_00740	KPNRH_05205	VK055_RS16095	ecl8_04898		No	No	No	No
135	KPNIH1_00745	KPNRH_05204	VK055_RS16090	ecl8_04897		No	No	No	No
136	KPNIH1_00750	KPNRH_05203	VK055_RS16085	ecl8_04896		No	No	No	No
137	KPNIH1_00755	KPNRH_05202	VK055_RS16080	ecl8_04895		No	No	No	No
138	KPNIH1_00760	KPNRH_05201	VK055_RS16075	ecl8_04894		No	No	No	No
139	KPNIH1_00765	KPNRH_05200	VK055_RS16070	ecl8_04893		No	No	No	No
140	KPNIH1_00770					No	No	No	No
141	KPNIH1_00795	KPNRH_05193	VK055_RS16040	ecl8_04888		No	No	No	No
142	KPNIH1_00800	KPNRH_05192	VK055_RS16035	ecl8_04887		No	No	No	No
143	KPNIH1_00805	KPNRH_05191	VK055_RS16030	ecl8_04886		Yes	Yes	Yes	Yes
144	KPNIH1_00810	KPNRH_05190	VK055_RS16025	ecl8_04885		Yes	No	Yes	Yes
145	KPNIH1_00815	KPNRH_05189	VK055_RS16015	ecl8_04884		No	No	No	No
146	KPNIH1_00820	KPNRH_05188	VK055_RS16010	ecl8_04883		No	No	No	No
147	KPNIH1_00825	KPNRH_05187	VK055_RS16005	ecl8_04882		No	No	No	No
148	KPNIH1_00830	KPNRH_05186	VK055_RS16000	ecl8_04881		Yes	No	No	No
149	KPNIH1_00835	KPNRH_05185	VK055_RS15995	ecl8_04880		No	No	No	No
150	KPNIH1_00840	KPNRH_05184	VK055_RS15990	ecl8_04879		No	No	No	No
151	KPNIH1_00845	KPNRH_05183	VK055_RS15985	ecl8_04878		No	No	No	No
152	KPNIH1_00850	KPNRH_05182	VK055_RS15980	ecl8_04877		No	No	No	No
153	KPNIH1_00855	KPNRH_05181	VK055_RS15970	ecl8_04876		No	No	No	No
154	KPNIH1_00860	KPNRH_05180	VK055_RS15965	ecl8_04875		No	No	No	No
155	KPNIH1_00865	KPNRH_05179	VK055_RS15960	ecl8_04874		No	No	No	No
156	KPNIH1_00870	KPNRH_05178	VK055_RS15955	ecl8_04873		No	No	No	No
157	KPNIH1_00875	KPNRH_05177	VK055_RS15950	ecl8_04872		No	No	No	No
158	KPNIH1_00880	KPNRH_05176	VK055_RS15945	ecl8_04871		No	No	No	No
159	KPNIH1_00885	KPNRH_05175	VK055_RS15940	ecl8_04870		No	No	No	No
160	KPNIH1_00890	KPNRH_05174	VK055_RS15935	ecl8_04869		No	No	No	No
161	KPNIH1_00895	KPNRH_05173	VK055_RS15930	ecl8_04868		No	No	No	No
162	KPNIH1_00900	KPNRH_05172	VK055_RS15925	ecl8_04867		No	No	No	No
163	KPNIH1_00905	KPNRH_05171	VK055_RS15920	ecl8_04866		No	No	No	No
164	KPNIH1_00910	KPNRH_05170	VK055_RS15915	ecl8_04865		No	No	No	No
165	KPNIH1_00915	KPNRH_05169	VK055_RS15910	ecl8_04864		No	No	No	No
166	KPNIH1_00920	KPNRH_05168	VK055_RS15905	ecl8_04863		No	No	No	No
167	KPNIH1_00925	KPNRH_05167	VK055_RS15900	ecl8_04862		No	No	No	No
168	KPNIH1_00930	KPNRH_05166	VK055_RS15895	ecl8_04861		No	No	No	No
169	KPNIH1_00935	KPNRH_05165	VK055_RS15890	ecl8_04860		Yes	Yes	Yes	Yes
170	KPNIH1_00940	KPNRH_05164	VK055_RS15885	ecl8_04859		No	No	No	No
171	KPNIH1_00945	KPNRH_05163	VK055_RS15880	ecl8_04858		Yes	Yes	Yes	Yes
172	KPNIH1_00950	KPNRH_05162	VK055_RS15875	ecl8_04857		No	No	No	No
173	KPNIH1_00955	KPNRH_05161	VK055_RS15870	ecl8_04856		No	No	No	No
174	KPNIH1_00960	KPNRH_05160	VK055_RS15865	ecl8_04855		No	No	No	No
175	KPNIH1_00965	KPNRH_05159	VK055_RS15860	ecl8_04854		No	No	No	No
176	KPNIH1_00970	KPNRH_05158	VK055_RS15855	ecl8_04853		No	No	No	No
177	KPNIH1_00975	KPNRH_05157	VK055_RS15845	ecl8_04852		Yes	Yes	Yes	Yes
178	KPNIH1_00980	KPNRH_05156	VK055_RS15840	ecl8_04851		No	No	No	No
179	KPNIH1_00985	KPNRH_05155	VK055_RS15835	ecl8_04850		No	No	No	No
180	KPNIH1_00990	KPNRH_05154	VK055_RS15830	ecl8_04849		No	No	No	No
181	KPNIH1_00995	KPNRH_05153	VK055_RS15825	ecl8_04848		No	No	No	No
182	KPNIH1_01000	KPNRH_05152	VK055_RS15820	ecl8_04847		No	No	No	No
183	KPNIH1_01005	KPNRH_05151	VK055_RS15815	ecl8_04846		No	No	No	No
184	KPNIH1_01010	KPNRH_05150	VK055_RS15810	ecl8_04845		Yes	Yes	Yes	Yes
185	KPNIH1_01020;KPNIH1_04740					No	No	No	No
186	KPNIH1_01025;KPNIH1_04745;KPNIH1_18620					No	No	No	No
187	KPNIH1_01030;KPNIH1_01240;KPNIH1_03035;KPNIH1_04750;KPNIH1_19720;KPNIH1_24040					No	No	No	No
188	KPNIH1_01060;KPNIH1_15775;KPNIH1_15780					No	No	No	No
189	KPNIH1_01065					No	No	No	No
190	KPNIH1_01070;KPNIH1_24030					No	No	No	No
191	KPNIH1_01095	KPNRH_05132	VK055_RS15725	ecl8_04828		Yes	Yes	Yes	Yes
192	KPNIH1_01100	KPNRH_05131	VK055_RS15720	ecl8_04827		Yes	Yes	Yes	Yes
193	KPNIH1_01105	KPNRH_05130	VK055_RS15715	ecl8_04826		Yes	Yes	Yes	Yes
194	KPNIH1_01110	KPNRH_05129	VK055_RS15710	ecl8_04825		Yes	Yes	Yes	Yes
195	KPNIH1_01115	KPNRH_05128	VK055_RS15705	ecl8_04824		Yes	Yes	Yes	Yes
196	KPNIH1_01120	KPNRH_05127	VK055_RS15700	ecl8_04823		No	No	No	No
197	KPNIH1_01125	KPNRH_05126	VK055_RS15695	ecl8_04822		No	No	No	No
198	KPNIH1_01130	KPNRH_05125	VK055_RS15690	ecl8_04821		No	No	No	No
199	KPNIH1_01135	KPNRH_05124	VK055_RS15685	ecl8_04820		No	No	No	No
200	KPNIH1_01140	KPNRH_05123	VK055_RS15675	ecl8_04819		No	No	No	No
201	KPNIH1_01145	KPNRH_05122	VK055_RS15670	ecl8_04818		No	No	No	No
202	KPNIH1_01150	KPNRH_05121	VK055_RS15665	ecl8_04817		No	No	No	No
203	KPNIH1_01155	KPNRH_05120	VK055_RS15660	ecl8_04816		No	No	No	No
204	KPNIH1_01160	KPNRH_05119	VK055_RS15655	ecl8_04815		No	No	No	No
205	KPNIH1_01165	KPNRH_05118	VK055_RS15650	ecl8_04814		No	No	No	No
206	KPNIH1_01170	KPNRH_05116	VK055_RS15645	ecl8_04813		No	No	No	No
207	KPNIH1_01175	KPNRH_05115	VK055_RS15640	ecl8_04812		No	No	No	No
208	KPNIH1_01180	KPNRH_05114	VK055_RS15635	ecl8_04811		Yes	Yes	Yes	Yes
209	KPNIH1_01185	KPNRH_05113	VK055_RS15630	ecl8_04810		No	No	No	No
210	KPNIH1_01190	KPNRH_05112	VK055_RS15625	ecl8_04809		No	No	No	No
211	KPNIH1_01195	KPNRH_05110;KPNRH_05111	VK055_RS15620	ecl8_04808		No	No	No	No
212	KPNIH1_01200	KPNRH_05109	VK055_RS15615	ecl8_04807		No	No	No	No
213	KPNIH1_01205	KPNRH_05108	VK055_RS15610	ecl8_04806		No	No	No	No
214	KPNIH1_01210	KPNRH_05107	VK055_RS15600	ecl8_04805		No	No	No	No
215	KPNIH1_01215	KPNRH_05106	VK055_RS15595	ecl8_04804		No	No	No	No
216	KPNIH1_01220	KPNRH_05105	VK055_RS15590	ecl8_04803		No	No	No	No
217	KPNIH1_01225	KPNRH_05104	VK055_RS15585	ecl8_04802		No	No	No	No
218	KPNIH1_01235;KPNIH1_03030;KPNIH1_19725					No	No	No	No
219	KPNIH1_01245;KPNIH1_03040;KPNIH1_04755;KPNIH1_19715;KPNIH1_24025;KPNIH1_24035					No	No	No	No
220	KPNIH1_01250	KPNRH_05097	VK055_RS15555	ecl8_04796		No	No	No	No
221	KPNIH1_01255	KPNRH_05096	VK055_RS15550	ecl8_04795		No	No	No	No
222	KPNIH1_01280	KPNRH_05091	VK055_RS15525	ecl8_04790		No	No	No	No
223	KPNIH1_01285	KPNRH_05090	VK055_RS15520	ecl8_04789		No	No	No	No
224	KPNIH1_01290	KPNRH_05089	VK055_RS15515	ecl8_04788		No	No	No	No
225	KPNIH1_01295	KPNRH_05088	VK055_RS15510	ecl8_04787		No	No	No	No
226	KPNIH1_01300	KPNRH_05087	VK055_RS15505	ecl8_04786		No	No	No	No
227	KPNIH1_01305	KPNRH_05086	VK055_RS15500	ecl8_04785		No	No	No	No
228	KPNIH1_01310	KPNRH_05085	VK055_RS15495	ecl8_04784		No	No	No	No
229	KPNIH1_01315	KPNRH_05084	VK055_RS15490	ecl8_04783		No	No	No	No
230	KPNIH1_01320	KPNRH_05083	VK055_RS15485	ecl8_04782		No	No	No	No
231	KPNIH1_01325	KPNRH_05082	VK055_RS15480	ecl8_04781		No	No	No	No
232	KPNIH1_01330	KPNRH_05081	VK055_RS15475	ecl8_04780		No	No	No	No
233	KPNIH1_01335	KPNRH_05080	VK055_RS15470	ecl8_04779		No	No	No	No
234	KPNIH1_01340	KPNRH_05079	VK055_RS15465	ecl8_04778		No	No	No	No
235	KPNIH1_01345	KPNRH_05078	VK055_RS15460	ecl8_04777		No	No	No	No
236	KPNIH1_01350	KPNRH_05076	VK055_RS15455	ecl8_04776		No	No	No	No
237	KPNIH1_01355	KPNRH_05075	VK055_RS15450	ecl8_04775		No	No	No	No
238	KPNIH1_01360	KPNRH_05074	VK055_RS15445	ecl8_04774		No	No	No	No
239	KPNIH1_01365	KPNRH_05073	VK055_RS15440	ecl8_04773		No	No	No	No
240	KPNIH1_01370;KPNIH1_01375	KPNRH_05071;KPNRH_05072	VK055_RS15435	ecl8_04772		No	No	No	No
241	KPNIH1_01380	KPNRH_05070	VK055_RS15430	ecl8_04771		No	No	No	No
242	KPNIH1_01385	KPNRH_05069	VK055_RS15425	ecl8_04770		No	No	No	No
243	KPNIH1_01390	KPNRH_05068	VK055_RS15420	ecl8_04769		No	No	No	No
244	KPNIH1_01395	KPNRH_05067	VK055_RS15415	ecl8_04768		No	No	No	No
245	KPNIH1_01400	KPNRH_05066	VK055_RS15410	ecl8_04767		No	No	No	No
246	KPNIH1_01405	KPNRH_05065	VK055_RS15405	ecl8_04766		No	No	No	No
247	KPNIH1_01410	KPNRH_05064	VK055_RS15400	ecl8_04765		No	No	No	No
248	KPNIH1_01415	KPNRH_05063	VK055_RS15395	ecl8_04764		No	No	No	No
249	KPNIH1_01420	KPNRH_05062	VK055_RS15390	ecl8_04763		No	No	No	No
250	KPNIH1_01425	KPNRH_05061	VK055_RS15385	ecl8_04762		No	No	No	No
251	KPNIH1_01430	KPNRH_05060	VK055_RS15380	ecl8_04761		Yes	No	Yes	Yes
252	KPNIH1_01435	KPNRH_05059	VK055_RS15375	ecl8_04760		Yes	Yes	Yes	Yes
253	KPNIH1_01440	KPNRH_05058	VK055_RS15370	ecl8_04759		No	No	No	No
254	KPNIH1_01445	KPNRH_05057	VK055_RS15365	ecl8_04758		Yes	Yes	No	Yes
255	KPNIH1_01450	KPNRH_05056	VK055_RS15360	ecl8_04757		No	No	No	No
256	KPNIH1_01455	KPNRH_05055	VK055_RS15350	ecl8_04756		No	No	No	No
257	KPNIH1_01460	KPNRH_05054	VK055_RS15345	ecl8_04755		No	No	No	No
258	KPNIH1_01465	KPNRH_05053	VK055_RS15335	ecl8_04754		No	No	No	No
259	KPNIH1_01470	KPNRH_05052	VK055_RS15330	ecl8_04753		No	No	No	No
260	KPNIH1_01475	KPNRH_05051	VK055_RS15325	ecl8_04752		Yes	No	No	No
261	KPNIH1_01480	KPNRH_05050	VK055_RS15320	ecl8_04751		No	No	No	No
262	KPNIH1_01485	KPNRH_05049	VK055_RS15315	ecl8_04750		Yes	Yes	Yes	Yes
263	KPNIH1_01490	KPNRH_05048	VK055_RS15310	ecl8_04749		No	No	No	No
264	KPNIH1_01495	KPNRH_05047	VK055_RS15305	ecl8_04748		No	No	No	No
265	KPNIH1_01500	KPNRH_05046	VK055_RS15300	ecl8_04747		No	No	No	No
266	KPNIH1_01505	KPNRH_05045	VK055_RS15295	ecl8_04746		No	No	No	No
267	KPNIH1_01510	KPNRH_05044	VK055_RS15290	ecl8_04745		Yes	No	No	No
268	KPNIH1_01515	KPNRH_05043	VK055_RS15285	ecl8_04744		No	No	No	No
269	KPNIH1_01520	KPNRH_05042	VK055_RS15280	ecl8_04743		No	No	Yes	Yes
270	KPNIH1_01525	KPNRH_05041	VK055_RS15275	ecl8_04742		No	No	No	No
271	KPNIH1_01530	KPNRH_05040	VK055_RS15265	ecl8_04741		No	No	No	No
272	KPNIH1_01535	KPNRH_05038	VK055_RS15260	ecl8_04740		No	No	No	No
273	KPNIH1_01540	KPNRH_05037	VK055_RS15255	ecl8_04739		No	No	No	No
274	KPNIH1_01545		VK055_RS15245			No	No	No	No
275	KPNIH1_01550	KPNRH_05036	VK055_RS15240	ecl8_04738		No	No	No	No
276	KPNIH1_01555	KPNRH_05035	VK055_RS15235	ecl8_04737		No	No	No	No
277	KPNIH1_01560	KPNRH_05034	VK055_RS15230	ecl8_04736		No	No	No	No
278	KPNIH1_01565	KPNRH_05033	VK055_RS15225	ecl8_04735		No	No	No	No
279	KPNIH1_01570	KPNRH_05032	VK055_RS15220	ecl8_04734		No	No	No	No
280	KPNIH1_01575;KPNIH1_02025	KPNRH_05029;KPNRH_05031	VK055_RS15215	ecl8_04733		No	No	No	No
281	KPNIH1_01580	KPNRH_05028	VK055_RS15210	ecl8_04732		No	No	No	No
282	KPNIH1_01585	KPNRH_05027	VK055_RS15205	ecl8_04731		No	No	No	No
283	KPNIH1_01590	KPNRH_05026	VK055_RS15200	ecl8_04730		No	No	No	No
284	KPNIH1_01595	KPNRH_05025	VK055_RS15195	ecl8_04729		No	No	No	No
285	KPNIH1_01600	KPNRH_05024	VK055_RS15185	ecl8_04728		No	No	No	No
286	KPNIH1_01605	KPNRH_05023	VK055_RS15180	ecl8_04727		No	No	No	No
287	KPNIH1_01610	KPNRH_05022	VK055_RS15175	ecl8_04726		No	No	No	No
288	KPNIH1_01615	KPNRH_05020	VK055_RS15170	ecl8_04725		No	No	No	No
289	KPNIH1_01620	KPNRH_05019	VK055_RS15165	ecl8_04724		No	No	No	No
290	KPNIH1_01625	KPNRH_05018	VK055_RS15160	ecl8_04723		No	No	No	No
291	KPNIH1_01630	KPNRH_05017	VK055_RS15155	ecl8_04722		No	No	No	No
292	KPNIH1_01635	KPNRH_05016	VK055_RS15150	ecl8_04721		No	No	No	No
293	KPNIH1_01640	KPNRH_05015	VK055_RS15145	ecl8_04720		No	No	No	No
294	KPNIH1_01650	KPNRH_05014	VK055_RS15135	ecl8_04719		No	No	No	No
295	KPNIH1_01655	KPNRH_05013	VK055_RS15130	ecl8_04718		No	No	No	No
296	KPNIH1_01660	KPNRH_05012	VK055_RS15125	ecl8_04717		No	No	No	No
297	KPNIH1_01665	KPNRH_05011	VK055_RS15120	ecl8_04716		No	No	No	No
298	KPNIH1_01670	KPNRH_05010		ecl8_04715		No	No	No	No
299	KPNIH1_01675	KPNRH_05009	VK055_RS15110	ecl8_04714		No	No	No	No
300	KPNIH1_01680	KPNRH_05008	VK055_RS15105	ecl8_04713		No	No	No	No
301	KPNIH1_01685	KPNRH_05007	VK055_RS15095	ecl8_04712		No	No	No	No
302	KPNIH1_01690	KPNRH_05006	VK055_RS15085	ecl8_04711		No	No	No	No
303	KPNIH1_01695	KPNRH_05005	VK055_RS15080	ecl8_04710		No	No	No	No
304	KPNIH1_01700	KPNRH_05004;KPNRH_05002;KPNRH_05003	VK055_RS15075	ecl8_04709;ecl8_04708		No	No	No	No
305	KPNIH1_01700;KPNIH1_10775;KPNIH1_14480;KPNIH1_19615	KPNRH_01295;KPNRH_02390;KPNRH_03129;KPNRH_05002;KPNRH_05003;KPNRH_05004	VK055_RS02650;VK055_RS05935;VK055_RS15075;VK055_RS23325	ecl8_01224;ecl8_02257;ecl8_02893;ecl8_04709;ecl8_04708		Yes	Yes	Yes	Yes
306	KPNIH1_01705	KPNRH_05001	VK055_RS15060	ecl8_04707		No	No	No	No
307	KPNIH1_01710	KPNRH_05000	VK055_RS15055	ecl8_04706		No	Yes	No	No
308	KPNIH1_01715	KPNRH_04999	VK055_RS15050	ecl8_04705		No	No	No	No
309	KPNIH1_01720	KPNRH_04998	VK055_RS15045	ecl8_04704		No	No	No	No
310	KPNIH1_01725	KPNRH_04997	VK055_RS15040	ecl8_04703		No	No	No	No
311	KPNIH1_01730	KPNRH_04996	VK055_RS15035	ecl8_04702		No	No	No	No
312	KPNIH1_01735	KPNRH_04995	VK055_RS15030	ecl8_04701		No	No	No	No
313	KPNIH1_01740	KPNRH_04994	VK055_RS15025	ecl8_04700		No	No	No	No
314	KPNIH1_01745	KPNRH_04993	VK055_RS15020	ecl8_04699		No	No	No	No
315	KPNIH1_01750	KPNRH_04992	VK055_RS15015	ecl8_04698		No	No	No	No
316	KPNIH1_01755	KPNRH_04991	VK055_RS15010	ecl8_04697		No	No	No	No
317	KPNIH1_01760	KPNRH_04990	VK055_RS15005	ecl8_04696		No	No	No	No
318	KPNIH1_01765	KPNRH_04989	VK055_RS15000	ecl8_04695		No	No	No	No
319	KPNIH1_01770	KPNRH_04988	VK055_RS14995	ecl8_04694		No	No	No	No
320	KPNIH1_01775	KPNRH_04987	VK055_RS14990	ecl8_04693		No	No	No	No
321	KPNIH1_01780	KPNRH_04986	VK055_RS14985	ecl8_04692		No	No	No	No
322	KPNIH1_01785	KPNRH_04985	VK055_RS14980	ecl8_04691		No	No	No	No
323	KPNIH1_01790	KPNRH_04984	VK055_RS14975	ecl8_04690		No	No	No	No
324	KPNIH1_01795	KPNRH_04983	VK055_RS14970	ecl8_04689		No	No	No	No
325	KPNIH1_01800	KPNRH_04982	VK055_RS14965	ecl8_04688		No	No	No	No
326	KPNIH1_01805	KPNRH_04981	VK055_RS14960	ecl8_04687		No	No	No	No
327	KPNIH1_01810		VK055_RS29760			No	No	No	No
328	KPNIH1_01815	KPNRH_04980	VK055_RS14950	ecl8_04686		No	No	No	No
329	KPNIH1_01820	KPNRH_04979	VK055_RS14945	ecl8_04685		No	No	No	No
330	KPNIH1_01825	KPNRH_04978	VK055_RS14940	ecl8_04684		No	No	No	No
331	KPNIH1_01830	KPNRH_04977	VK055_RS14935	ecl8_04683		No	No	No	No
332	KPNIH1_01835	KPNRH_04976	VK055_RS14925	ecl8_04682		No	No	No	No
333	KPNIH1_01840	KPNRH_04975	VK055_RS14920	ecl8_04681		No	No	No	No
334	KPNIH1_01845;KPNIH1_01850;KPNIH1_01905;KPNIH1_01910;KPNIH1_06985;KPNIH1_06990;KPNIH1_10425;KPNIH1_10430;KPNIH1_17280;KPNIH1_17285;KPNIH1_25175;KPNIH1_25180	KPNRH_00216;KPNRH_00217;KPNRH_01779;KPNRH_01780;KPNRH_03199;KPNRH_03200;KPNRH_03945;KPNRH_03946;KPNRH_04961;KPNRH_04962;KPNRH_04973;KPNRH_04974	VK055_RS27945;VK055_RS28020;VK055_RS28025;VK055_RS28050;VK055_RS28110;VK055_RS28205	ecl8_00161;ecl8_00162;ecl8_00217;ecl8_00218;ecl8_01580;ecl8_01581;ecl8_01895;ecl8_01896;ecl8_03646;ecl8_03647;ecl8_04669;ecl8_04670;ecl8_02401;ecl8_02402		No	Yes	Yes	No
335	KPNIH1_01855	KPNRH_04972	VK055_RS14915	ecl8_04680		No	No	No	No
336	KPNIH1_01860	KPNRH_04971	VK055_RS14910	ecl8_04679		No	No	No	No
337	KPNIH1_01865	KPNRH_04970	VK055_RS14900;VK055_RS29045	ecl8_04678		No	No	No	No
338	KPNIH1_01870	KPNRH_04969	VK055_RS14890	ecl8_04677		No	No	No	No
339	KPNIH1_01875	KPNRH_04968	VK055_RS14885	ecl8_04676		No	No	No	No
340	KPNIH1_01880	KPNRH_04967	VK055_RS14880	ecl8_04675		No	No	No	No
341	KPNIH1_01885	KPNRH_04966	VK055_RS14875	ecl8_04674		No	No	No	No
342	KPNIH1_01890	KPNRH_04965	VK055_RS14870	ecl8_04673		No	No	No	No
343	KPNIH1_01895	KPNRH_04964	VK055_RS14865	ecl8_04672		No	No	No	No
344	KPNIH1_01900	KPNRH_04963	VK055_RS14855	ecl8_04671		No	No	No	No
345	KPNIH1_01915;KPNIH1_22260					No	No	No	No
346	KPNIH1_01920	KPNRH_04959	VK055_RS14820	ecl8_04667		No	No	No	No
347	KPNIH1_01925	KPNRH_04958	VK055_RS14815	ecl8_04666		No	No	No	No
348	KPNIH1_01930	KPNRH_04957	VK055_RS14810	ecl8_04665		No	No	No	No
349	KPNIH1_01935	KPNRH_04956	VK055_RS14805	ecl8_04664		No	No	No	No
350	KPNIH1_01940	KPNRH_04955	VK055_RS14800	ecl8_04663		No	No	No	No
351	KPNIH1_01945	KPNRH_04954	VK055_RS14795	ecl8_04662		No	No	No	No
352	KPNIH1_01950	KPNRH_04953	VK055_RS14785	ecl8_04661		No	No	No	No
353	KPNIH1_01955	KPNRH_04952	VK055_RS14780	ecl8_04660		No	No	No	No
354	KPNIH1_01960	KPNRH_04951	VK055_RS14770	ecl8_04659		Yes	Yes	Yes	Yes
355	KPNIH1_01965	KPNRH_04950	VK055_RS14765	ecl8_04658		Yes	Yes	Yes	Yes
356	KPNIH1_01970	KPNRH_04949		ecl8_04657		No	No	No	No
357	KPNIH1_01975	KPNRH_04948		ecl8_04656		No	No	No	No
358	KPNIH1_01980	KPNRH_04947		ecl8_04655		No	No	No	No
359	KPNIH1_01985	KPNRH_04946		ecl8_04654		No	No	No	Yes
360	KPNIH1_01990	KPNRH_04945		ecl8_04653		No	No	No	No
361	KPNIH1_01995	KPNRH_04944		ecl8_04652		No	No	No	No
362	KPNIH1_02000	KPNRH_04943		ecl8_04651		No	No	No	Yes
363	KPNIH1_02005	KPNRH_04942		ecl8_04650		No	No	No	No
364	KPNIH1_02015	KPNRH_04940;KPNRH_01991;KPNRH_05029	VK055_RS26475	ecl8_04648		No	No	No	No
365	KPNIH1_02030	KPNRH_04938		ecl8_04647		No	No	No	No
366	KPNIH1_02035	KPNRH_04937	VK055_RS14705	ecl8_04646		No	No	No	No
367	KPNIH1_02040	KPNRH_04936	VK055_RS14700	ecl8_04645		No	Yes	No	No
368	KPNIH1_02045	KPNRH_04935	VK055_RS14695	ecl8_04644		No	No	No	No
369	KPNIH1_02050	KPNRH_04934	VK055_RS14690	ecl8_04643		No	No	No	No
370	KPNIH1_02055	KPNRH_04933	VK055_RS14685	ecl8_04642		No	No	No	No
371	KPNIH1_02060	KPNRH_04932	VK055_RS14680	ecl8_04641		No	No	No	No
372	KPNIH1_02065	KPNRH_04931	VK055_RS14675	ecl8_04640		No	No	No	No
373	KPNIH1_02070	KPNRH_04930	VK055_RS14670	ecl8_04639		No	No	No	No
374	KPNIH1_02075	KPNRH_04929	VK055_RS14665	ecl8_04638		No	No	No	No
375	KPNIH1_02080	KPNRH_04928	VK055_RS14660	ecl8_04637		No	No	No	No
376	KPNIH1_02085	KPNRH_04927	VK055_RS14655	ecl8_04636		No	No	No	No
377	KPNIH1_02090	KPNRH_04926	VK055_RS14650	ecl8_04635		No	No	No	No
378	KPNIH1_02095	KPNRH_04925	VK055_RS14645	ecl8_04634		No	No	No	No
379	KPNIH1_02100	KPNRH_04924	VK055_RS14640	ecl8_04633		Yes	Yes	No	Yes
380	KPNIH1_02105	KPNRH_04923	VK055_RS14635	ecl8_04632		No	Yes	Yes	Yes
381	KPNIH1_02110	KPNRH_04922	VK055_RS14630	ecl8_04631		No	Yes	Yes	Yes
382	KPNIH1_02115	KPNRH_04921	VK055_RS14625	ecl8_04630		No	No	No	No
383	KPNIH1_02120;KPNIH1_02125;KPNIH1_02130;KPNIH1_16820					No	No	No	No
384	KPNIH1_02135	KPNRH_04917	VK055_RS14600	ecl8_04626		No	No	No	No
385	KPNIH1_02140	KPNRH_04916	VK055_RS14595	ecl8_04625		No	No	No	No
386	KPNIH1_02145	KPNRH_04915	VK055_RS14590	ecl8_04624		Yes	No	Yes	Yes
387	KPNIH1_02150	KPNRH_04914	VK055_RS14585	ecl8_04623		No	No	No	No
388	KPNIH1_02155	KPNRH_04913	VK055_RS14580	ecl8_04622		No	No	No	No
389	KPNIH1_02160	KPNRH_04912	VK055_RS14575	ecl8_04621		No	No	No	No
390	KPNIH1_02165	KPNRH_04911	VK055_RS14570	ecl8_04620		No	No	No	No
391	KPNIH1_02170	KPNRH_04910	VK055_RS14565	ecl8_04619		No	No	No	No
392	KPNIH1_02175	KPNRH_04909	VK055_RS14560	ecl8_04618		No	No	No	No
393	KPNIH1_02180	KPNRH_04908	VK055_RS14555	ecl8_04617		No	No	No	No
394	KPNIH1_02185	KPNRH_04907	VK055_RS14550	ecl8_04616		No	No	No	No
395	KPNIH1_02190	KPNRH_04906	VK055_RS14540	ecl8_04615		No	No	No	No
396	KPNIH1_02195	KPNRH_04905	VK055_RS14535	ecl8_04614		No	No	No	No
397	KPNIH1_02200	KPNRH_04904	VK055_RS14530	ecl8_04613		No	No	No	No
398	KPNIH1_02205	KPNRH_04903	VK055_RS14525	ecl8_04612		No	No	No	No
399	KPNIH1_02210	KPNRH_04902	VK055_RS14520	ecl8_04611		No	No	No	No
400	KPNIH1_02215	KPNRH_04901	VK055_RS14515	ecl8_04610		No	No	No	No
401	KPNIH1_02220	KPNRH_04900	VK055_RS14510	ecl8_04609		No	No	No	No
402	KPNIH1_02225	KPNRH_04899	VK055_RS14505	ecl8_04608		No	No	No	No
403	KPNIH1_02250	KPNRH_04895	VK055_RS14485	ecl8_04604		No	No	No	No
404	KPNIH1_02255	KPNRH_04894	VK055_RS14480	ecl8_04603		No	No	No	No
405	KPNIH1_02260	KPNRH_04893	VK055_RS14475	ecl8_04602		No	No	No	No
406	KPNIH1_02265	KPNRH_04892	VK055_RS14470	ecl8_04601		No	No	No	No
407	KPNIH1_02270	KPNRH_04891	VK055_RS14465	ecl8_04600		No	No	No	No
408	KPNIH1_02275	KPNRH_04890	VK055_RS14460	ecl8_04599		No	No	No	No
409	KPNIH1_02280	KPNRH_04889	VK055_RS14455	ecl8_04598		No	No	No	No
410	KPNIH1_02285	KPNRH_04888	VK055_RS14450	ecl8_04597		No	No	No	No
411	KPNIH1_02290	KPNRH_04887	VK055_RS14445	ecl8_04596		Yes	Yes	Yes	Yes
412	KPNIH1_02295	KPNRH_04886	VK055_RS14440	ecl8_04595		Yes	Yes	Yes	Yes
413	KPNIH1_02300	KPNRH_04885	VK055_RS14435	ecl8_04594		Yes	No	Yes	Yes
414	KPNIH1_02305	KPNRH_04884	VK055_RS14430	ecl8_04593		No	No	No	No
415	KPNIH1_02310	KPNRH_04883	VK055_RS14425	ecl8_04592		No	No	No	No
416	KPNIH1_02315	KPNRH_04882	VK055_RS14420	ecl8_04591		No	No	No	No
417	KPNIH1_02320	KPNRH_04881	VK055_RS14415	ecl8_04590		No	No	No	No
418	KPNIH1_02325	KPNRH_04880	VK055_RS14410	ecl8_04589		No	No	No	No
419	KPNIH1_02330	KPNRH_04879	VK055_RS14405	ecl8_04588		No	No	No	No
420	KPNIH1_02335	KPNRH_04878	VK055_RS14400	ecl8_04587		No	No	No	No
421	KPNIH1_02340	KPNRH_04877	VK055_RS14395	ecl8_04586		No	No	No	No
422	KPNIH1_02345	KPNRH_04876	VK055_RS14390	ecl8_04585		Yes	No	No	No
423	KPNIH1_02350	KPNRH_04875	VK055_RS14385	ecl8_04584		No	No	No	No
424	KPNIH1_02355	KPNRH_04874	VK055_RS14380	ecl8_04583		No	No	No	No
425	KPNIH1_02360	KPNRH_04873	VK055_RS14375	ecl8_04582		No	No	No	No
426	KPNIH1_02365	KPNRH_04872	VK055_RS14370	ecl8_04581		No	No	No	No
427	KPNIH1_02370		VK055_RS14365	ecl8_04580		No	No	No	No
428	KPNIH1_02375	KPNRH_04871	VK055_RS14350	ecl8_04577		No	No	No	No
429	KPNIH1_02380	KPNRH_04869	VK055_RS14345	ecl8_04576		No	No	No	No
430	KPNIH1_02385	KPNRH_04868	VK055_RS14340	ecl8_04575		No	No	No	No
431	KPNIH1_02390	KPNRH_04867	VK055_RS14335	ecl8_04574		No	No	No	No
432	KPNIH1_02395	KPNRH_04866	VK055_RS14330	ecl8_04573		No	No	No	No
433	KPNIH1_02400	KPNRH_04865		ecl8_04572		No	No	No	No
434	KPNIH1_02405	KPNRH_04863	VK055_RS14325	ecl8_04570		No	No	No	No
435	KPNIH1_02410	KPNRH_04862	VK055_RS14320	ecl8_04569		Yes	Yes	Yes	Yes
436	KPNIH1_02415	KPNRH_04861	VK055_RS14315	ecl8_04568		No	No	No	No
437	KPNIH1_02420	KPNRH_04860	VK055_RS14305	ecl8_04567		No	No	No	No
438	KPNIH1_02425	KPNRH_04859	VK055_RS14300	ecl8_04566		No	No	No	No
439	KPNIH1_02430	KPNRH_04858	VK055_RS14295	ecl8_04565		No	No	No	No
440	KPNIH1_02435	KPNRH_04857	VK055_RS14290	ecl8_04564		No	No	No	No
441	KPNIH1_02440	KPNRH_04856	VK055_RS14285	ecl8_04563		No	No	No	No
442	KPNIH1_02445	KPNRH_04855	VK055_RS14280	ecl8_04562		No	No	No	No
443	KPNIH1_02450	KPNRH_04854	VK055_RS14275	ecl8_04561		No	No	No	No
444	KPNIH1_02455	KPNRH_04853	VK055_RS14265	ecl8_04560		No	No	No	No
445	KPNIH1_02460	KPNRH_04852	VK055_RS14260	ecl8_04559		No	No	No	No
446	KPNIH1_02465	KPNRH_04851	VK055_RS14255	ecl8_04558		No	No	No	No
447	KPNIH1_02470	KPNRH_04850	VK055_RS14245	ecl8_04557		No	No	No	No
448	KPNIH1_02475	KPNRH_04849	VK055_RS14240	ecl8_04556		No	No	No	No
449	KPNIH1_02480	KPNRH_04848	VK055_RS14235	ecl8_04555		No	No	No	No
450	KPNIH1_02485	KPNRH_04847	VK055_RS14230	ecl8_04554		No	No	No	No
451	KPNIH1_02490	KPNRH_04846	VK055_RS14225	ecl8_04553		No	No	No	No
452	KPNIH1_02495	KPNRH_04845	VK055_RS14220	ecl8_04552		No	No	No	No
453	KPNIH1_02500	KPNRH_04844	VK055_RS14215	ecl8_04551		No	No	No	No
454	KPNIH1_02505	KPNRH_04843	VK055_RS14210	ecl8_04550		No	No	No	No
455	KPNIH1_02510	KPNRH_04842	VK055_RS14205	ecl8_04549		No	No	No	No
456	KPNIH1_02515	KPNRH_04841	VK055_RS14200	ecl8_04548		No	No	No	No
457	KPNIH1_02520	KPNRH_04840	VK055_RS14195	ecl8_04547		No	No	No	No
458	KPNIH1_02525	KPNRH_04839	VK055_RS14190			No	No	No	No
459	KPNIH1_02530	KPNRH_04838	VK055_RS14185	ecl8_04546		No	No	No	No
460	KPNIH1_02535	KPNRH_04837	VK055_RS14180	ecl8_04545		No	No	No	No
461	KPNIH1_02540	KPNRH_04836	VK055_RS14170	ecl8_04544		No	No	No	No
462	KPNIH1_02545	KPNRH_04835	VK055_RS14160	ecl8_04543		No	No	No	No
463	KPNIH1_02550	KPNRH_04834	VK055_RS14155	ecl8_04542		No	No	No	No
464	KPNIH1_02555	KPNRH_04833	VK055_RS14150	ecl8_04541		No	No	No	No
465	KPNIH1_02560	KPNRH_04832	VK055_RS14145	ecl8_04540		No	No	No	No
466	KPNIH1_02565	KPNRH_04831	VK055_RS14140	ecl8_04539		No	No	No	No
467	KPNIH1_02570	KPNRH_04830	VK055_RS14135	ecl8_04538		No	No	No	No
468	KPNIH1_02575	KPNRH_04828	VK055_RS14130	ecl8_04537		No	No	No	No
469	KPNIH1_02580	KPNRH_04827	VK055_RS14125	ecl8_04536		No	No	No	No
470	KPNIH1_02585	KPNRH_04826	VK055_RS14120	ecl8_04535		No	No	No	No
471	KPNIH1_02590	KPNRH_04825	VK055_RS14115	ecl8_04534		No	No	No	No
472	KPNIH1_02595	KPNRH_04824	VK055_RS14110	ecl8_04533		No	No	No	No
473	KPNIH1_02600	KPNRH_04823	VK055_RS14100	ecl8_04532		No	No	No	No
474	KPNIH1_02605	KPNRH_04822	VK055_RS14095	ecl8_04531		No	No	No	No
475	KPNIH1_02610	KPNRH_04821	VK055_RS14090	ecl8_04530		No	No	No	No
476	KPNIH1_02615	KPNRH_04820	VK055_RS14085	ecl8_04529		No	No	No	No
477	KPNIH1_02620	KPNRH_04819	VK055_RS14080	ecl8_04528		No	No	No	No
478	KPNIH1_02625	KPNRH_04818	VK055_RS14075	ecl8_04527		No	No	No	No
479	KPNIH1_02630	KPNRH_04817	VK055_RS14070	ecl8_04526		No	No	No	No
480	KPNIH1_02635	KPNRH_04816	VK055_RS14065	ecl8_04525		No	No	No	No
481	KPNIH1_02640	KPNRH_04815	VK055_RS14060	ecl8_04524		No	No	No	No
482	KPNIH1_02645	KPNRH_04814	VK055_RS14055	ecl8_04523		Yes	Yes	Yes	Yes
483	KPNIH1_02650	KPNRH_04813	VK055_RS14050	ecl8_04522		Yes	No	Yes	No
484	KPNIH1_02655	KPNRH_04812	VK055_RS14045	ecl8_04521		No	No	No	No
485	KPNIH1_02660	KPNRH_04811	VK055_RS14040	ecl8_04520		No	Yes	Yes	Yes
486	KPNIH1_02665	KPNRH_04810	VK055_RS14035	ecl8_04519		Yes	Yes	Yes	Yes
487	KPNIH1_02670	KPNRH_04809	VK055_RS14030	ecl8_04518		No	No	No	No
488	KPNIH1_02675	KPNRH_04808	VK055_RS14025	ecl8_04517		No	No	No	No
489	KPNIH1_02680	KPNRH_04807	VK055_RS14020	ecl8_04516		No	No	No	No
490	KPNIH1_02685	KPNRH_04806	VK055_RS14015	ecl8_04515		No	No	No	No
491	KPNIH1_02690;KPNIH1_02705;KPNIH1_05135	KPNRH_03639;KPNRH_04314	VK055_RS28375	ecl8_00073;ecl8_02683;ecl8_03143;ecl8_03351;ecl8_03366;ecl8_03645		No	No	No	No
492	KPNIH1_02700	KPNRH_04805				No	No	No	No
493	KPNIH1_02710	KPNRH_04804	VK055_RS13995	ecl8_04514		No	No	No	No
494	KPNIH1_02715	KPNRH_04803	VK055_RS13990	ecl8_04513		No	No	No	No
495	KPNIH1_02720	KPNRH_04802	VK055_RS13980	ecl8_04512		No	No	No	No
496	KPNIH1_02725	KPNRH_04801	VK055_RS13975	ecl8_04511		No	No	No	No
497	KPNIH1_02730	KPNRH_04800	VK055_RS13970	ecl8_04510		No	No	No	No
498	KPNIH1_02735	KPNRH_04799	VK055_RS13965	ecl8_04509		No	No	No	No
499	KPNIH1_02740	KPNRH_04798	VK055_RS13960	ecl8_04508		No	No	No	No
500	KPNIH1_02745	KPNRH_04797	VK055_RS13955	ecl8_04507		No	No	No	No
501	KPNIH1_02750	KPNRH_04796	VK055_RS13950	ecl8_04506		No	No	No	No
502	KPNIH1_02755	KPNRH_04795	VK055_RS13945	ecl8_04505		No	No	No	No
503	KPNIH1_02760	KPNRH_04794	VK055_RS13940	ecl8_04504		No	No	No	No
504	KPNIH1_02765	KPNRH_04793	VK055_RS13935	ecl8_04503		No	No	No	No
505	KPNIH1_02770	KPNRH_04792	VK055_RS13930	ecl8_04502		No	No	No	No
506	KPNIH1_02775	KPNRH_04791	VK055_RS13925	ecl8_04501		No	No	No	No
507	KPNIH1_02780					No	No	No	No
508	KPNIH1_02785	KPNRH_04789				No	No	No	No
509	KPNIH1_02790	KPNRH_04788				Yes	No	No	No
510	KPNIH1_02795	KPNRH_04787				Yes	No	No	No
511	KPNIH1_02800	KPNRH_04786				No	No	No	No
512	KPNIH1_02810;KPNIH1_05075	KPNRH_04325;KPNRH_04785				No	No	No	No
513	KPNIH1_02815;KPNIH1_05070	KPNRH_04326;KPNRH_04784				No	No	No	No
514	KPNIH1_02820;KPNIH1_05065	KPNRH_04327;KPNRH_04783				No	No	No	No
515	KPNIH1_02825;KPNIH1_05060	KPNRH_04328;KPNRH_04782				No	No	No	No
516	KPNIH1_02830	KPNRH_04331;KPNRH_04779;KPNRH_04780;KPNRH_04781				No	No	No	No
517	KPNIH1_02830;KPNIH1_05055	KPNRH_04331;KPNRH_04779				No	No	No	No
518	KPNIH1_02835	KPNRH_04778				Yes	No	No	No
519	KPNIH1_02840;KPNIH1_05045	KPNRH_04333;KPNRH_04777				No	No	No	No
520	KPNIH1_02845;KPNIH1_05040	KPNRH_04334;KPNRH_04776				No	No	No	No
521	KPNIH1_02850	KPNRH_04775				No	No	No	No
522	KPNIH1_02860	KPNRH_04773				No	No	No	No
523	KPNIH1_02865					No	No	No	No
524	KPNIH1_02870	KPNRH_04772				No	No	No	No
525	KPNIH1_02875	KPNRH_04771				No	No	No	No
526	KPNIH1_02880	KPNRH_04770				Yes	No	No	No
527	KPNIH1_02885					No	No	No	No
528	KPNIH1_02890	KPNRH_04769				No	No	No	No
529	KPNIH1_02895	KPNRH_04768	VK055_RS13700			No	No	No	No
530	KPNIH1_02900	KPNRH_04767	VK055_RS13695	ecl8_04459		No	No	No	No
531	KPNIH1_02905	KPNRH_04766	VK055_RS13690	ecl8_04458		No	No	No	No
532	KPNIH1_02910	KPNRH_04765	VK055_RS13685	ecl8_04457		No	No	No	No
533	KPNIH1_02915;KPNIH1_25980	KPNRH_00054;KPNRH_04764	VK055_RS13675;VK055_RS17240	ecl8_00051;ecl8_04456		No	No	No	No
534	KPNIH1_02925	KPNRH_04762	VK055_RS13665	ecl8_04454		No	No	No	No
535	KPNIH1_02930	KPNRH_04761	VK055_RS13660	ecl8_04453		No	No	No	No
536	KPNIH1_02935	KPNRH_04760	VK055_RS13655	ecl8_04452		No	No	No	No
537	KPNIH1_02940	KPNRH_04759	VK055_RS13650	ecl8_04451		No	No	No	No
538	KPNIH1_02945	KPNRH_04758	VK055_RS13645	ecl8_04450		No	No	No	No
539	KPNIH1_02950	KPNRH_04757	VK055_RS13640	ecl8_04449		No	No	No	No
540	KPNIH1_02955	KPNRH_04756	VK055_RS13635	ecl8_04448		No	No	No	No
541	KPNIH1_02960	KPNRH_04755	VK055_RS13630	ecl8_04447		No	No	No	No
542	KPNIH1_02965	KPNRH_04754	VK055_RS13625	ecl8_04446		No	No	No	No
543	KPNIH1_02970	KPNRH_04753	VK055_RS13620	ecl8_04445		Yes	No	No	No
544	KPNIH1_02975	KPNRH_04752	VK055_RS13615	ecl8_04444		No	No	No	No
545	KPNIH1_02980	KPNRH_04751	VK055_RS13610	ecl8_04443		No	No	No	No
546	KPNIH1_02985	KPNRH_04750	VK055_RS13605	ecl8_04442		No	No	No	No
547	KPNIH1_02990	KPNRH_04749	VK055_RS13600	ecl8_04441		No	No	No	No
548	KPNIH1_02995	KPNRH_04748	VK055_RS13595	ecl8_04440		No	No	No	No
549	KPNIH1_03000	KPNRH_04747	VK055_RS13585	ecl8_04439		No	No	No	No
550	KPNIH1_03005	KPNRH_04746	VK055_RS13580	ecl8_04438		No	No	No	No
551	KPNIH1_03010	KPNRH_04745	VK055_RS13575	ecl8_04437		Yes	No	No	No
552	KPNIH1_03015	KPNRH_04744	VK055_RS13570	ecl8_04436		No	No	No	No
553	KPNIH1_03020	KPNRH_04743	VK055_RS13565	ecl8_04435		No	No	No	No
554	KPNIH1_03045	KPNRH_04737	VK055_RS13535	ecl8_04430		No	No	No	No
555	KPNIH1_03050	KPNRH_04736	VK055_RS13530	ecl8_04429		No	No	No	No
556	KPNIH1_03055	KPNRH_04735	VK055_RS13525	ecl8_04428		No	No	No	No
557	KPNIH1_03060	KPNRH_04734	VK055_RS13520	ecl8_04427		No	No	No	No
558	KPNIH1_03065	KPNRH_04733	VK055_RS13510	ecl8_04426		No	No	No	No
559	KPNIH1_03070	KPNRH_04732	VK055_RS13505	ecl8_04425		No	No	No	No
560	KPNIH1_03075	KPNRH_04731	VK055_RS13500	ecl8_04424		No	No	No	No
561	KPNIH1_03080	KPNRH_04730	VK055_RS13495	ecl8_04423		No	No	No	No
562	KPNIH1_03085	KPNRH_04729	VK055_RS13490	ecl8_04422		No	No	No	No
563	KPNIH1_03090	KPNRH_04728	VK055_RS13485	ecl8_04421		No	No	No	No
564	KPNIH1_03095	KPNRH_04727	VK055_RS13480	ecl8_04420;ecl8_04419		No	No	No	No
565	KPNIH1_03100	KPNRH_04726	VK055_RS13475	ecl8_04418		Yes	No	No	No
566	KPNIH1_03105	KPNRH_04725	VK055_RS13470	ecl8_04417		No	No	No	No
567	KPNIH1_03115	KPNRH_04723	VK055_RS13460	ecl8_04415		No	No	No	No
568	KPNIH1_03120	KPNRH_04722	VK055_RS13455	ecl8_04414		No	No	No	No
569	KPNIH1_03125	KPNRH_04721	VK055_RS13450	ecl8_04413		No	No	No	No
570	KPNIH1_03130	KPNRH_04720	VK055_RS13445	ecl8_04412		No	No	No	No
571	KPNIH1_03135	KPNRH_04719	VK055_RS13440	ecl8_04411		No	No	No	No
572	KPNIH1_03140	KPNRH_04718	VK055_RS13435	ecl8_04410		No	No	No	No
573	KPNIH1_03145	KPNRH_04717	VK055_RS13430	ecl8_04409		No	No	No	No
574	KPNIH1_03150	KPNRH_04716	VK055_RS13425	ecl8_04408		No	No	No	No
575	KPNIH1_03155	KPNRH_04715	VK055_RS13420	ecl8_04407		No	No	No	No
576	KPNIH1_03160	KPNRH_04714	VK055_RS13415	ecl8_04406		No	No	No	No
577	KPNIH1_03165	KPNRH_04713	VK055_RS13410	ecl8_04405		No	No	No	No
578	KPNIH1_03170	KPNRH_04712	VK055_RS13405	ecl8_04404		No	No	No	No
579	KPNIH1_03195	KPNRH_04707	VK055_RS13380	ecl8_04399		No	No	No	No
580	KPNIH1_03200	KPNRH_04706	VK055_RS13375	ecl8_04398		No	No	No	Yes
581	KPNIH1_03205	KPNRH_04705	VK055_RS13370	ecl8_04397		No	No	No	No
582	KPNIH1_03210	KPNRH_04704	VK055_RS13365	ecl8_04396		No	No	No	No
583	KPNIH1_03215	KPNRH_04703	VK055_RS13360	ecl8_04395		No	No	No	No
584	KPNIH1_03220	KPNRH_04702	VK055_RS13355	ecl8_04394		No	No	No	No
585	KPNIH1_03225	KPNRH_04701	VK055_RS13350	ecl8_04393		No	No	No	No
586	KPNIH1_03230	KPNRH_04700	VK055_RS13345	ecl8_04392		No	No	No	No
587	KPNIH1_03235	KPNRH_04699	VK055_RS13340	ecl8_04391		No	No	No	No
588	KPNIH1_03240	KPNRH_04698	VK055_RS13335	ecl8_04390		No	No	No	No
589	KPNIH1_03245	KPNRH_04697	VK055_RS13330	ecl8_04389		No	No	No	No
590	KPNIH1_03250	KPNRH_04696	VK055_RS13325	ecl8_04388		No	No	No	No
591	KPNIH1_03255	KPNRH_04695	VK055_RS13320	ecl8_04387		No	No	No	No
592	KPNIH1_03260	KPNRH_04694	VK055_RS13315	ecl8_04386		No	No	No	No
593	KPNIH1_03265	KPNRH_04693	VK055_RS13305	ecl8_04385		No	No	No	No
594	KPNIH1_03270	KPNRH_04692	VK055_RS29605	ecl8_04384		No	No	No	No
595	KPNIH1_03275	KPNRH_04691				No	No	No	No
596	KPNIH1_03280	KPNRH_04690	VK055_RS13290	ecl8_04383		No	No	No	No
597	KPNIH1_03285	KPNRH_04689	VK055_RS13285	ecl8_04382;ecl8_04381		No	No	No	Yes
598	KPNIH1_03290	KPNRH_04688	VK055_RS13275	ecl8_04380		No	No	No	No
599	KPNIH1_03295	KPNRH_04687	VK055_RS13270	ecl8_04379		No	No	No	No
600	KPNIH1_03300	KPNRH_04686	VK055_RS13265	ecl8_04378		No	No	No	No
601	KPNIH1_03305	KPNRH_04685	VK055_RS13260	ecl8_04377		No	No	No	No
602	KPNIH1_03310	KPNRH_04684	VK055_RS13255	ecl8_04376		No	No	No	No
603	KPNIH1_03315	KPNRH_04683	VK055_RS13250	ecl8_04375		No	No	No	No
604	KPNIH1_03320	KPNRH_04682	VK055_RS13245	ecl8_04374		No	No	No	No
605	KPNIH1_03325	KPNRH_04681	VK055_RS13240	ecl8_04372		No	No	No	No
606	KPNIH1_03330	KPNRH_04680	VK055_RS13235			No	No	No	No
607	KPNIH1_03335	KPNRH_04679	VK055_RS13230			No	No	No	No
608	KPNIH1_03340	KPNRH_04678	VK055_RS13225			No	No	No	No
609	KPNIH1_03345	KPNRH_04677	VK055_RS13220			No	No	No	No
610	KPNIH1_03350	KPNRH_04676	VK055_RS13215	ecl8_04371		No	No	No	No
611	KPNIH1_03355	KPNRH_04675	VK055_RS13210	ecl8_04370		No	No	No	No
612	KPNIH1_03360	KPNRH_04674	VK055_RS13205	ecl8_04369		No	No	No	No
613	KPNIH1_03365	KPNRH_04673	VK055_RS13200	ecl8_04368		No	No	No	No
614	KPNIH1_03370	KPNRH_04672	VK055_RS13195	ecl8_04367		No	No	No	No
615	KPNIH1_03375	KPNRH_04671	VK055_RS13190	ecl8_04366		No	No	No	No
616	KPNIH1_03380	KPNRH_04670	VK055_RS13185	ecl8_04365		No	No	No	No
617	KPNIH1_03385	KPNRH_04669	VK055_RS13180	ecl8_04364		No	No	No	No
618	KPNIH1_03390	KPNRH_04668	VK055_RS13175	ecl8_04363		No	No	No	No
619	KPNIH1_03395	KPNRH_04667	VK055_RS13170	ecl8_04362		No	No	No	No
620	KPNIH1_03400	KPNRH_04666	VK055_RS13165	ecl8_04361		Yes	Yes	Yes	Yes
621	KPNIH1_03405	KPNRH_04665	VK055_RS13160	ecl8_04360		Yes	Yes	Yes	Yes
622	KPNIH1_03410	KPNRH_04664	VK055_RS13155	ecl8_04359		No	No	No	No
623	KPNIH1_03415	KPNRH_04663	VK055_RS13150	ecl8_04358		No	No	No	No
624	KPNIH1_03420	KPNRH_04662	VK055_RS13140	ecl8_04357		No	No	No	No
625	KPNIH1_03425	KPNRH_04661	VK055_RS13135	ecl8_04356		No	No	No	No
626	KPNIH1_03430	KPNRH_04660	VK055_RS13130	ecl8_04355		No	No	No	No
627	KPNIH1_03435	KPNRH_04659	VK055_RS13125	ecl8_04354		No	No	No	No
628	KPNIH1_03440	KPNRH_04658	VK055_RS13120	ecl8_04353		No	No	No	No
629	KPNIH1_03445	KPNRH_04657	VK055_RS13115	ecl8_04352		No	No	No	No
630	KPNIH1_03450	KPNRH_04656	VK055_RS13110	ecl8_04351		No	No	No	No
631	KPNIH1_03455	KPNRH_04655	VK055_RS13105	ecl8_04350		No	No	No	No
632	KPNIH1_03460	KPNRH_04654	VK055_RS13095	ecl8_04349		No	No	No	No
633	KPNIH1_03465;KPNIH1_03470;KPNIH1_03475					No	No	No	No
634	KPNIH1_03480	KPNRH_04650	VK055_RS13075	ecl8_04345		No	No	No	No
635	KPNIH1_03485	KPNRH_04649	VK055_RS13070	ecl8_04344		Yes	No	Yes	No
636	KPNIH1_03490	KPNRH_04648	VK055_RS13065	ecl8_04343		No	No	No	No
637	KPNIH1_03495	KPNRH_04647	VK055_RS13060	ecl8_04342		No	No	No	No
638	KPNIH1_03500	KPNRH_04646	VK055_RS13055	ecl8_04341		No	No	No	No
639	KPNIH1_03505	KPNRH_04645	VK055_RS13050	ecl8_04340		No	No	No	No
640	KPNIH1_03515	KPNRH_04643	VK055_RS13040	ecl8_04338		No	No	No	No
641	KPNIH1_03520	KPNRH_04642	VK055_RS13035	ecl8_04337		No	No	No	No
642	KPNIH1_03525	KPNRH_04641	VK055_RS13030	ecl8_04336		No	No	No	No
643	KPNIH1_03530	KPNRH_04640	VK055_RS13025	ecl8_04335		No	No	No	No
644	KPNIH1_03535	KPNRH_04639	VK055_RS13020	ecl8_04334		No	No	No	No
645	KPNIH1_03540	KPNRH_04638	VK055_RS13015	ecl8_04333		No	No	No	No
646	KPNIH1_03545	KPNRH_04637	VK055_RS13010	ecl8_04332		No	No	No	No
647	KPNIH1_03550	KPNRH_04636	VK055_RS13005	ecl8_04331		No	No	No	No
648	KPNIH1_03555	KPNRH_04635	VK055_RS13000	ecl8_04330		No	No	No	No
649	KPNIH1_03560	KPNRH_04634	VK055_RS12995	ecl8_04329		No	No	No	No
650	KPNIH1_03565	KPNRH_04633;KPNRH_04870	VK055_RS12990	ecl8_04328		No	No	No	No
651	KPNIH1_03565;KPNIH1_09270	KPNRH_03486;KPNRH_04633;KPNRH_04870	VK055_RS07590;VK055_RS12990	ecl8_03204;ecl8_04328		No	No	No	No
652	KPNIH1_03570	KPNRH_04632	VK055_RS12985	ecl8_04327		No	No	No	No
653	KPNIH1_03575	KPNRH_04631	VK055_RS12980	ecl8_04326		No	No	No	No
654	KPNIH1_03580	KPNRH_04630	VK055_RS12975	ecl8_04325		No	No	No	No
655	KPNIH1_03585	KPNRH_04629	VK055_RS12970	ecl8_04324		Yes	No	No	No
656	KPNIH1_03590	KPNRH_04628	VK055_RS12965	ecl8_04323		No	No	No	No
657	KPNIH1_03595	KPNRH_04627	VK055_RS12960	ecl8_04322		No	No	No	No
658	KPNIH1_03600	KPNRH_04626	VK055_RS12955	ecl8_04321		No	No	No	No
659	KPNIH1_03605	KPNRH_04625	VK055_RS12950	ecl8_04320		No	No	No	No
660	KPNIH1_03610	KPNRH_04624	VK055_RS12945	ecl8_04319		No	No	No	No
661	KPNIH1_03615	KPNRH_04623	VK055_RS12940	ecl8_04318		No	No	No	No
662	KPNIH1_03620	KPNRH_04622	VK055_RS12935	ecl8_04317		No	No	No	No
663	KPNIH1_03625	KPNRH_04621	VK055_RS12930	ecl8_04316		No	No	No	No
664	KPNIH1_03630	KPNRH_04620	VK055_RS12925	ecl8_04315		No	No	No	No
665	KPNIH1_03635	KPNRH_04618	VK055_RS12915	ecl8_04314		No	No	No	No
666	KPNIH1_03655	KPNRH_04614	VK055_RS12895	ecl8_04310		No	No	No	No
667	KPNIH1_03660	KPNRH_04613	VK055_RS12890	ecl8_04308;ecl8_04309		No	No	No	No
668	KPNIH1_03665	KPNRH_04612	VK055_RS12885	ecl8_04307		No	No	No	No
669	KPNIH1_03670	KPNRH_04611	VK055_RS12880	ecl8_04306		No	No	No	No
670	KPNIH1_03675	KPNRH_04610	VK055_RS12875	ecl8_04305		No	No	No	No
671	KPNIH1_03680	KPNRH_04609	VK055_RS12870	ecl8_04304		No	No	No	No
672	KPNIH1_03685	KPNRH_04608	VK055_RS12865	ecl8_04303		No	No	No	No
673	KPNIH1_03690	KPNRH_04607	VK055_RS12860	ecl8_04302		No	No	No	No
674	KPNIH1_03695	KPNRH_04606	VK055_RS12855	ecl8_04301		No	Yes	Yes	No
675	KPNIH1_03700	KPNRH_04604	VK055_RS12850	ecl8_04300		No	No	No	No
676	KPNIH1_03705	KPNRH_04603	VK055_RS12845	ecl8_04299		No	No	No	No
677	KPNIH1_03710	KPNRH_04602	VK055_RS12840	ecl8_04298		No	No	No	No
678	KPNIH1_03715	KPNRH_04601	VK055_RS12830	ecl8_04297		Yes	Yes	Yes	Yes
679	KPNIH1_03720	KPNRH_04600	VK055_RS12825	ecl8_04296		Yes	Yes	Yes	Yes
680	KPNIH1_03725	KPNRH_04599	VK055_RS12820	ecl8_04295		Yes	Yes	Yes	Yes
681	KPNIH1_03730	KPNRH_04598	VK055_RS12815	ecl8_04294		Yes	Yes	Yes	Yes
682	KPNIH1_03735	KPNRH_04597	VK055_RS12810	ecl8_04293		No	No	No	No
683	KPNIH1_03740	KPNRH_04596	VK055_RS12805	ecl8_04292		Yes	Yes	Yes	Yes
684	KPNIH1_03745	KPNRH_04595	VK055_RS12800	ecl8_04291		No	No	No	No
685	KPNIH1_03750	KPNRH_04594	VK055_RS12795	ecl8_04290		No	No	No	No
686	KPNIH1_03755	KPNRH_04593	VK055_RS12790	ecl8_04289		No	No	No	No
687	KPNIH1_03760	KPNRH_04592	VK055_RS12785	ecl8_04288		No	No	No	No
688	KPNIH1_03765	KPNRH_04591	VK055_RS12780	ecl8_04287		No	No	No	No
689	KPNIH1_03770	KPNRH_04590	VK055_RS12775	ecl8_04286		No	No	No	No
690	KPNIH1_03775	KPNRH_04589	VK055_RS12770;VK055_RS19435	ecl8_04285		No	No	No	No
691	KPNIH1_03780	KPNRH_04588	VK055_RS12765;VK055_RS19430	ecl8_04284		No	No	No	No
692	KPNIH1_03785	KPNRH_04587	VK055_RS12760;VK055_RS19425	ecl8_04283		No	No	No	No
693	KPNIH1_03790	KPNRH_04586	VK055_RS12755	ecl8_04282		No	No	No	No
694	KPNIH1_03795	KPNRH_04585	VK055_RS12750	ecl8_04281		No	No	No	No
695	KPNIH1_03800	KPNRH_04584	VK055_RS12745	ecl8_04280		No	No	No	No
696	KPNIH1_03805	KPNRH_04583	VK055_RS12740	ecl8_04279		No	No	No	No
697	KPNIH1_03810	KPNRH_04582	VK055_RS12735	ecl8_04278		No	No	No	No
698	KPNIH1_03815	KPNRH_04581	VK055_RS12730	ecl8_04277		No	No	No	No
699	KPNIH1_03820	KPNRH_04580	VK055_RS12725	ecl8_04276		Yes	Yes	Yes	Yes
700	KPNIH1_03830	KPNRH_04578	VK055_RS12710	ecl8_04275		No	No	No	No
701	KPNIH1_03835	KPNRH_04577	VK055_RS12705	ecl8_04274		No	No	No	No
702	KPNIH1_03840	KPNRH_04576	VK055_RS12700	ecl8_04273		No	No	No	No
703	KPNIH1_03845	KPNRH_04575	VK055_RS12695	ecl8_04272		No	No	No	No
704	KPNIH1_03850	KPNRH_04574	VK055_RS12690	ecl8_04271		No	No	No	No
705	KPNIH1_03855	KPNRH_04573	VK055_RS12685	ecl8_04270		No	No	Yes	Yes
706	KPNIH1_03860	KPNRH_04572	VK055_RS12680	ecl8_04269		No	No	No	No
707	KPNIH1_03865	KPNRH_04571	VK055_RS12675	ecl8_04268		No	No	No	No
708	KPNIH1_03870	KPNRH_04570	VK055_RS12670	ecl8_04267		No	No	No	No
709	KPNIH1_03875	KPNRH_04569	VK055_RS12665	ecl8_04266		No	No	No	No
710	KPNIH1_03880	KPNRH_04568	VK055_RS12660	ecl8_04265		No	No	No	No
711	KPNIH1_03885	KPNRH_04567	VK055_RS12655	ecl8_04264		Yes	Yes	Yes	Yes
712	KPNIH1_03890	KPNRH_04566	VK055_RS12650	ecl8_04263		No	No	No	No
713	KPNIH1_03895	KPNRH_04565	VK055_RS12645	ecl8_04262		No	No	No	No
714	KPNIH1_03900	KPNRH_04564	VK055_RS12640	ecl8_04261		No	No	No	No
715	KPNIH1_03910	KPNRH_04563	VK055_RS12635	ecl8_04260		No	No	No	No
716	KPNIH1_03915	KPNRH_04562	VK055_RS12625	ecl8_04259		No	No	No	No
717	KPNIH1_03920	KPNRH_04561	VK055_RS12620	ecl8_04258		No	No	No	No
718	KPNIH1_03925	KPNRH_04560	VK055_RS12615	ecl8_04257		No	No	No	No
719	KPNIH1_03930	KPNRH_04559	VK055_RS12610	ecl8_04256		No	No	No	No
720	KPNIH1_03935	KPNRH_04558	VK055_RS12605	ecl8_04255		No	No	No	No
721	KPNIH1_03940	KPNRH_04557	VK055_RS12600	ecl8_04254		No	No	No	No
722	KPNIH1_03945	KPNRH_04556	VK055_RS12595	ecl8_04253		No	No	No	No
723	KPNIH1_03950	KPNRH_04555	VK055_RS12585	ecl8_04252		No	No	No	No
724	KPNIH1_03955	KPNRH_04554	VK055_RS12580	ecl8_04251		No	No	No	No
725	KPNIH1_03960	KPNRH_04553	VK055_RS12575	ecl8_04250		No	No	No	No
726	KPNIH1_03965	KPNRH_04552	VK055_RS12570	ecl8_04249		No	No	No	No
727	KPNIH1_03970	KPNRH_04551	VK055_RS12565	ecl8_04248		No	No	No	No
728	KPNIH1_03975	KPNRH_04550	VK055_RS12560	ecl8_04247		No	No	No	No
729	KPNIH1_03985	KPNRH_04547	VK055_RS12545	ecl8_04245		No	No	No	No
730	KPNIH1_03990	KPNRH_04546	VK055_RS12540	ecl8_04244		No	No	No	No
731	KPNIH1_03995	KPNRH_04545	VK055_RS12535	ecl8_04243		No	No	No	No
732	KPNIH1_04000	KPNRH_04544	VK055_RS12530	ecl8_04242		No	No	No	No
733	KPNIH1_04005	KPNRH_04543	VK055_RS12525	ecl8_04241		No	No	No	No
734	KPNIH1_04010	KPNRH_04542	VK055_RS12520	ecl8_04240		No	No	No	No
735	KPNIH1_04015	KPNRH_04541	VK055_RS12515	ecl8_04239		No	No	No	No
736	KPNIH1_04020	KPNRH_04540	VK055_RS12510	ecl8_04238		No	No	No	No
737	KPNIH1_04025	KPNRH_04539	VK055_RS12505	ecl8_04237		No	No	No	No
738	KPNIH1_04030	KPNRH_04538	VK055_RS12500	ecl8_04236		No	No	No	No
739	KPNIH1_04035	KPNRH_04537	VK055_RS12495	ecl8_04235		No	No	No	No
740	KPNIH1_04040	KPNRH_04535	VK055_RS12485	ecl8_04234		No	No	No	No
741	KPNIH1_04045	KPNRH_04534	VK055_RS12480	ecl8_04233		No	No	No	No
742	KPNIH1_04050	KPNRH_04533	VK055_RS12475	ecl8_04232		No	No	No	No
743	KPNIH1_04055	KPNRH_04532	VK055_RS12470	ecl8_04231		No	No	No	No
744	KPNIH1_04060	KPNRH_04531	VK055_RS12465	ecl8_04230		No	No	No	Yes
745	KPNIH1_04065	KPNRH_04530	VK055_RS12460	ecl8_04229		No	No	Yes	Yes
746	KPNIH1_04070	KPNRH_04529	VK055_RS12455	ecl8_04228		Yes	No	Yes	Yes
747	KPNIH1_04075	KPNRH_04528	VK055_RS12450	ecl8_04227		Yes	Yes	Yes	Yes
748	KPNIH1_04080	KPNRH_04527	VK055_RS12445	ecl8_04226		Yes	Yes	Yes	Yes
749	KPNIH1_04085	KPNRH_04526	VK055_RS12440	ecl8_04225		Yes	Yes	Yes	Yes
750	KPNIH1_04090	KPNRH_04525	VK055_RS12435	ecl8_04224		Yes	Yes	Yes	Yes
751	KPNIH1_04095	KPNRH_04524	VK055_RS12430	ecl8_04223		Yes	Yes	Yes	Yes
752	KPNIH1_04100	KPNRH_04523	VK055_RS12425	ecl8_04222		Yes	No	Yes	Yes
753	KPNIH1_04105	KPNRH_04522	VK055_RS12420	ecl8_04221		Yes	Yes	Yes	Yes
754	KPNIH1_04110	KPNRH_04521	VK055_RS12415	ecl8_04220		Yes	Yes	Yes	Yes
755	KPNIH1_04115	KPNRH_04520	VK055_RS12410	ecl8_04219		No	No	Yes	No
756	KPNIH1_04120	KPNRH_04519	VK055_RS12405	ecl8_04218		Yes	No	Yes	Yes
757	KPNIH1_04125	KPNRH_04518	VK055_RS12400	ecl8_04217		Yes	Yes	Yes	Yes
758	KPNIH1_04130	KPNRH_04517	VK055_RS12395	ecl8_04216		Yes	Yes	Yes	Yes
759	KPNIH1_04135	KPNRH_04516	VK055_RS12390	ecl8_04215		Yes	Yes	Yes	Yes
760	KPNIH1_04140	KPNRH_04515	VK055_RS12385	ecl8_04214		No	No	Yes	Yes
761	KPNIH1_04145	KPNRH_04513;KPNRH_04514	VK055_RS12380	ecl8_04213		Yes	Yes	Yes	Yes
762	KPNIH1_04150	KPNRH_04512	VK055_RS12375	ecl8_04212		No	No	No	No
763	KPNIH1_04155	KPNRH_04511	VK055_RS12370	ecl8_04211		No	No	No	No
764	KPNIH1_04160	KPNRH_04510	VK055_RS12365	ecl8_04210		No	No	No	No
765	KPNIH1_04165	KPNRH_04509	VK055_RS12360	ecl8_04209		Yes	No	No	Yes
766	KPNIH1_04170	KPNRH_04508	VK055_RS12350	ecl8_04208		No	No	No	No
767	KPNIH1_04175	KPNRH_04507	VK055_RS12345	ecl8_04207		No	No	No	No
768	KPNIH1_04180	KPNRH_04506	VK055_RS12340	ecl8_04206		No	No	No	No
769	KPNIH1_04185	KPNRH_04505	VK055_RS12335	ecl8_04205		No	No	No	No
770	KPNIH1_04190	KPNRH_04504	VK055_RS12330	ecl8_04204		No	No	No	No
771	KPNIH1_04195	KPNRH_04503	VK055_RS12325	ecl8_04203		No	No	No	No
772	KPNIH1_04200	KPNRH_04502	VK055_RS12320	ecl8_04202		No	No	No	No
773	KPNIH1_04205	KPNRH_04501	VK055_RS12315	ecl8_04201		No	No	No	No
774	KPNIH1_04210	KPNRH_04500	VK055_RS12310	ecl8_04200		No	No	No	No
775	KPNIH1_04215	KPNRH_04499	VK055_RS12305	ecl8_04199		No	No	No	No
776	KPNIH1_04220	KPNRH_04498	VK055_RS12295	ecl8_04198		No	No	No	No
777	KPNIH1_04225	KPNRH_04496	VK055_RS12290	ecl8_04197		No	Yes	No	No
778	KPNIH1_04230	KPNRH_04495	VK055_RS12285	ecl8_04196		No	Yes	No	No
779	KPNIH1_04235	KPNRH_04494	VK055_RS12280	ecl8_04195		No	Yes	Yes	Yes
780	KPNIH1_04240	KPNRH_04493	VK055_RS12275	ecl8_04194		No	No	No	No
781	KPNIH1_04245	KPNRH_04492	VK055_RS12270	ecl8_04193		No	No	No	No
782	KPNIH1_04250	KPNRH_04491	VK055_RS12265	ecl8_04192		No	No	No	No
783	KPNIH1_04255	KPNRH_04490	VK055_RS12255	ecl8_04191		No	Yes	No	Yes
784	KPNIH1_04260	KPNRH_04489	VK055_RS12250	ecl8_04190		No	No	No	No
785	KPNIH1_04265	KPNRH_04488	VK055_RS12245	ecl8_04189		No	No	No	No
786	KPNIH1_04270	KPNRH_04487	VK055_RS12240	ecl8_04188		No	No	No	No
787	KPNIH1_04275;KPNIH1_04290	KPNRH_04483;KPNRH_04486	VK055_RS28920	ecl8_04187		No	No	No	No
788	KPNIH1_04280;KPNIH1_11410	KPNRH_02979;KPNRH_04485				No	Yes	No	No
789	KPNIH1_04285;KPNIH1_11415	KPNRH_02978;KPNRH_04484				No	Yes	No	No
790	KPNIH1_04295	KPNRH_04482	VK055_RS12230	ecl8_04186		No	No	No	No
791	KPNIH1_04300	KPNRH_04481	VK055_RS12225	ecl8_04185		No	No	No	No
792	KPNIH1_04305	KPNRH_04480	VK055_RS12220	ecl8_04184		No	No	No	No
793	KPNIH1_04310	KPNRH_04479	VK055_RS12215	ecl8_04183		No	No	No	No
794	KPNIH1_04315	KPNRH_04478	VK055_RS12205	ecl8_04182		No	No	No	No
795	KPNIH1_04320	KPNRH_04477	VK055_RS12200	ecl8_04181		No	No	No	No
796	KPNIH1_04325	KPNRH_04476	VK055_RS12195	ecl8_04180		No	No	No	No
797	KPNIH1_04330	KPNRH_04475	VK055_RS12190	ecl8_04179		No	No	No	No
798	KPNIH1_04335	KPNRH_04474	VK055_RS12185	ecl8_04178		No	No	No	No
799	KPNIH1_04340	KPNRH_04473	VK055_RS12180	ecl8_04177		No	No	No	No
800	KPNIH1_04345	KPNRH_04472	VK055_RS12175	ecl8_04176		No	No	No	No
801	KPNIH1_04350	KPNRH_04471	VK055_RS12170	ecl8_04175		No	No	No	No
802	KPNIH1_04355	KPNRH_04470	VK055_RS12165	ecl8_04174		No	No	No	No
803	KPNIH1_04360	KPNRH_04469	VK055_RS12160	ecl8_04173		Yes	No	Yes	Yes
804	KPNIH1_04365	KPNRH_04468	VK055_RS12155	ecl8_04172		No	No	No	No
805	KPNIH1_04370	KPNRH_04467	VK055_RS12150	ecl8_04171		No	No	No	No
806	KPNIH1_04375	KPNRH_04466	VK055_RS12145	ecl8_04170		No	No	No	No
807	KPNIH1_04380	KPNRH_04465	VK055_RS12140	ecl8_04169		No	No	No	No
808	KPNIH1_04385	KPNRH_04464	VK055_RS12135	ecl8_04168		No	No	No	No
809	KPNIH1_04390	KPNRH_04463	VK055_RS12130	ecl8_04167		No	No	No	No
810	KPNIH1_04395	KPNRH_04462	VK055_RS12125	ecl8_04166		No	No	No	No
811	KPNIH1_04400	KPNRH_04461	VK055_RS12120	ecl8_04165		No	No	No	No
812	KPNIH1_04405	KPNRH_04460	VK055_RS12115	ecl8_04164		No	No	No	No
813	KPNIH1_04410	KPNRH_04459	VK055_RS12110	ecl8_04163		No	No	No	No
814	KPNIH1_04415	KPNRH_04458	VK055_RS12105	ecl8_04162		No	No	No	No
815	KPNIH1_04420	KPNRH_04457	VK055_RS12100	ecl8_04161		No	No	No	No
816	KPNIH1_04425	KPNRH_04456	VK055_RS12095	ecl8_04160		No	No	No	No
817	KPNIH1_04430	KPNRH_04455	VK055_RS12090	ecl8_04159		No	No	No	No
818	KPNIH1_04435	KPNRH_04454	VK055_RS12085	ecl8_04158		No	No	No	No
819	KPNIH1_04440	KPNRH_04453	VK055_RS12080	ecl8_04157		No	No	No	No
820	KPNIH1_04445	KPNRH_04452	VK055_RS12075	ecl8_04156		No	No	No	No
821	KPNIH1_04450	KPNRH_04451	VK055_RS12070	ecl8_04155		No	No	No	No
822	KPNIH1_04455	KPNRH_04450	VK055_RS12065	ecl8_04154		No	No	No	No
823	KPNIH1_04460	KPNRH_04449	VK055_RS12055	ecl8_04153		No	No	No	No
824	KPNIH1_04465	KPNRH_04448	VK055_RS12050	ecl8_04152		No	No	No	No
825	KPNIH1_04470		VK055_RS12045			No	No	No	No
826	KPNIH1_04480	KPNRH_04447	VK055_RS12030	ecl8_04151		No	No	No	No
827	KPNIH1_04485	KPNRH_04446	VK055_RS12025	ecl8_04150		No	No	No	No
828	KPNIH1_04490	KPNRH_04445	VK055_RS12020	ecl8_04149		No	No	No	No
829	KPNIH1_04495	KPNRH_04444	VK055_RS12015	ecl8_04148		No	No	No	No
830	KPNIH1_04500	KPNRH_04443	VK055_RS12010	ecl8_04147		No	No	No	No
831	KPNIH1_04505	KPNRH_04442	VK055_RS12005	ecl8_04146		Yes	Yes	Yes	No
832	KPNIH1_04510	KPNRH_04441	VK055_RS12000	ecl8_04145		No	No	No	No
833	KPNIH1_04515	KPNRH_04440	VK055_RS11995	ecl8_04144		Yes	Yes	Yes	Yes
834	KPNIH1_04520	KPNRH_04439	VK055_RS11990	ecl8_04143		No	No	No	No
835	KPNIH1_04525	KPNRH_04438	VK055_RS11985	ecl8_04142		No	No	No	No
836	KPNIH1_04530	KPNRH_04437	VK055_RS11980	ecl8_04141		No	Yes	No	No
837	KPNIH1_04535	KPNRH_04436	VK055_RS11975	ecl8_04140		No	No	No	No
838	KPNIH1_04540	KPNRH_04435	VK055_RS11970	ecl8_04139		No	No	No	No
839	KPNIH1_04545	KPNRH_04434	VK055_RS11965	ecl8_04138		No	No	No	No
840	KPNIH1_04550	KPNRH_04433	VK055_RS11960	ecl8_04137		No	No	No	No
841	KPNIH1_04555	KPNRH_04432	VK055_RS11955	ecl8_04136		Yes	No	Yes	Yes
842	KPNIH1_04560	KPNRH_04431	VK055_RS11950	ecl8_04135		No	No	No	No
843	KPNIH1_04565	KPNRH_04430	VK055_RS11945	ecl8_04134		No	No	No	No
844	KPNIH1_04570	KPNRH_04428	VK055_RS11940	ecl8_04133		Yes	Yes	Yes	Yes
845	KPNIH1_04575	KPNRH_04427	VK055_RS11935	ecl8_04132		Yes	Yes	Yes	Yes
846	KPNIH1_04580	KPNRH_04426	VK055_RS11930	ecl8_04131		Yes	Yes	Yes	Yes
847	KPNIH1_04585	KPNRH_04425	VK055_RS11925	ecl8_04130		Yes	Yes	Yes	Yes
848	KPNIH1_04590	KPNRH_04424	VK055_RS11920	ecl8_04129		Yes	Yes	Yes	Yes
849	KPNIH1_04595	KPNRH_04423	VK055_RS11915	ecl8_04128		Yes	No	Yes	Yes
850	KPNIH1_04600	KPNRH_04422	VK055_RS11910	ecl8_04127		Yes	Yes	Yes	Yes
851	KPNIH1_04605	KPNRH_04421	VK055_RS11905	ecl8_04126		Yes	Yes	Yes	Yes
852	KPNIH1_04610	KPNRH_04420	VK055_RS11900	ecl8_04125		Yes	Yes	Yes	Yes
853	KPNIH1_04615	KPNRH_04419	VK055_RS11895	ecl8_04124		No	No	Yes	No
854	KPNIH1_04620	KPNRH_04418	VK055_RS11890	ecl8_04123		Yes	Yes	Yes	Yes
855	KPNIH1_04625	KPNRH_04417	VK055_RS11885	ecl8_04122		Yes	Yes	Yes	Yes
856	KPNIH1_04630	KPNRH_04416	VK055_RS11880	ecl8_04121		Yes	Yes	Yes	Yes
857	KPNIH1_04635	KPNRH_04415	VK055_RS11875	ecl8_04120		Yes	Yes	Yes	Yes
858	KPNIH1_04640	KPNRH_04414	VK055_RS11870	ecl8_04119		No	No	Yes	No
859	KPNIH1_04645	KPNRH_04413	VK055_RS11865	ecl8_04118		Yes	Yes	Yes	Yes
860	KPNIH1_04650	KPNRH_04412	VK055_RS11860	ecl8_04117		Yes	Yes	Yes	Yes
861	KPNIH1_04655	KPNRH_04411	VK055_RS11855	ecl8_04116		No	No	No	No
862	KPNIH1_04660	KPNRH_04410	VK055_RS11850	ecl8_04115		No	No	No	No
863	KPNIH1_04665	KPNRH_04409	VK055_RS11845	ecl8_04114		Yes	Yes	Yes	Yes
864	KPNIH1_04670	KPNRH_04408	VK055_RS11840	ecl8_04113		No	No	No	No
865	KPNIH1_04675	KPNRH_04407	VK055_RS11835	ecl8_04112		No	No	No	No
866	KPNIH1_04680	KPNRH_04406	VK055_RS11830	ecl8_04111		No	No	No	No
867	KPNIH1_04685	KPNRH_04405	VK055_RS11825	ecl8_04110		No	No	No	No
868	KPNIH1_04690	KPNRH_04404	VK055_RS11820	ecl8_04109		No	No	No	No
869	KPNIH1_04695	KPNRH_04403	VK055_RS11815	ecl8_04108		No	No	No	No
870	KPNIH1_04700	KPNRH_04402	VK055_RS11810	ecl8_04107		Yes	Yes	Yes	Yes
871	KPNIH1_04705	KPNRH_04401	VK055_RS11805	ecl8_04106		No	No	No	No
872	KPNIH1_04710	KPNRH_04400	VK055_RS11800	ecl8_04105		No	No	No	No
873	KPNIH1_04715	KPNRH_04399	VK055_RS11795	ecl8_04104		No	No	No	No
874	KPNIH1_04720	KPNRH_04398	VK055_RS11790	ecl8_04103		No	No	No	No
875	KPNIH1_04725	KPNRH_04397	VK055_RS11785	ecl8_04102		No	No	No	No
876	KPNIH1_04730	KPNRH_04396	VK055_RS11780	ecl8_04101		No	No	No	No
877	KPNIH1_04760;KPNIH1_04820					No	No	No	No
878	KPNIH1_04770	KPNRH_04388	VK055_RS11745	ecl8_04094		No	No	No	No
879	KPNIH1_04775	KPNRH_04387	VK055_RS11740	ecl8_04093		No	No	No	No
880	KPNIH1_04780	KPNRH_04386	VK055_RS11735	ecl8_04092		No	No	No	No
881	KPNIH1_04785	KPNRH_04385	VK055_RS11730	ecl8_04091		No	No	No	No
882	KPNIH1_04790	KPNRH_04384	VK055_RS11725	ecl8_04090		No	No	No	No
883	KPNIH1_04795	KPNRH_04383	VK055_RS11720	ecl8_04089		No	No	No	No
884	KPNIH1_04800	KPNRH_04382	VK055_RS11715	ecl8_04088		No	No	No	No
885	KPNIH1_04805	KPNRH_04381	VK055_RS11710	ecl8_04087		No	No	No	No
886	KPNIH1_04810	KPNRH_04380	VK055_RS11705	ecl8_04086		No	No	No	Yes
887	KPNIH1_04815	KPNRH_04379	VK055_RS11700	ecl8_04085		Yes	No	Yes	Yes
888	KPNIH1_04825	KPNRH_04377	VK055_RS11690	ecl8_04083		No	No	No	No
889	KPNIH1_04830	KPNRH_04376	VK055_RS11685	ecl8_04082		No	No	No	No
890	KPNIH1_04835	KPNRH_04375	VK055_RS11680	ecl8_04081		No	No	No	No
891	KPNIH1_04840	KPNRH_04374	VK055_RS11675	ecl8_04080		No	No	No	No
892	KPNIH1_04845	KPNRH_04373	VK055_RS11670	ecl8_04079		Yes	Yes	Yes	Yes
893	KPNIH1_04850	KPNRH_04372	VK055_RS11665	ecl8_04078		No	No	No	No
894	KPNIH1_04855	KPNRH_04371	VK055_RS11660	ecl8_04077		No	No	No	No
895	KPNIH1_04860	KPNRH_04370	VK055_RS11650	ecl8_04076		No	No	No	No
896	KPNIH1_04865	KPNRH_04369	VK055_RS11645	ecl8_04075		No	No	No	No
897	KPNIH1_04870	KPNRH_04368	VK055_RS11640	ecl8_04074		No	No	No	No
898	KPNIH1_04875	KPNRH_04367	VK055_RS11635	ecl8_04073		No	No	No	No
899	KPNIH1_04880	KPNRH_04366	VK055_RS11630	ecl8_04072		No	No	No	No
900	KPNIH1_04885	KPNRH_04365	VK055_RS11625	ecl8_04071		No	No	No	No
901	KPNIH1_04890	KPNRH_04364	VK055_RS11620	ecl8_04070		No	No	No	No
902	KPNIH1_04895	KPNRH_04363	VK055_RS11615	ecl8_04069		No	No	No	No
903	KPNIH1_04900	KPNRH_04362	VK055_RS11610	ecl8_04068		No	No	No	No
904	KPNIH1_04905	KPNRH_04361	VK055_RS11605	ecl8_04067		Yes	No	No	No
905	KPNIH1_04910	KPNRH_04360	VK055_RS11600	ecl8_04066		No	No	No	No
906	KPNIH1_04915	KPNRH_04359	VK055_RS11595	ecl8_04065		No	No	No	No
907	KPNIH1_04920	KPNRH_04358	VK055_RS11590	ecl8_04064		No	No	No	No
908	KPNIH1_04925	KPNRH_04357	VK055_RS11585	ecl8_04063		No	No	No	No
909	KPNIH1_04930	KPNRH_04356	VK055_RS11580	ecl8_04062		No	No	No	No
910	KPNIH1_04935	KPNRH_04355	VK055_RS11575	ecl8_04061		No	No	No	No
911	KPNIH1_04940	KPNRH_04354	VK055_RS11570	ecl8_04060		No	No	No	No
912	KPNIH1_04945	KPNRH_04353	VK055_RS11565	ecl8_04059		No	No	No	No
913	KPNIH1_04950	KPNRH_04352	VK055_RS11560	ecl8_04058		No	No	No	No
914	KPNIH1_04955	KPNRH_04351	VK055_RS11555	ecl8_04057		No	No	No	No
915	KPNIH1_04960	KPNRH_04350	VK055_RS11550	ecl8_04056		No	No	No	No
916	KPNIH1_04965	KPNRH_04349	VK055_RS11545	ecl8_04055		No	No	No	No
917	KPNIH1_05000	KPNRH_04342	VK055_RS11510			No	No	No	No
918	KPNIH1_05005	KPNRH_04341	VK055_RS11505			No	No	No	No
919	KPNIH1_05010	KPNRH_04340	VK055_RS11500	ecl8_04052		No	No	No	No
920	KPNIH1_05015	KPNRH_04339	VK055_RS11495	ecl8_04051		No	No	No	No
921	KPNIH1_05020	KPNRH_04338	VK055_RS11490	ecl8_04050		No	No	No	No
922	KPNIH1_05025	KPNRH_04337	VK055_RS11485	ecl8_04049		No	No	No	No
923	KPNIH1_05030	KPNRH_04336	VK055_RS11480	ecl8_04048		No	No	No	No
924	KPNIH1_05055	KPNRH_04331;KPNRH_04779;KPNRH_04329;KPNRH_04330				No	No	No	No
925	KPNIH1_05085	KPNRH_04324				Yes	No	No	No
926	KPNIH1_05090	KPNRH_04323				Yes	No	No	No
927	KPNIH1_05095	KPNRH_04322				No	No	No	No
928	KPNIH1_05100					No	No	No	No
929	KPNIH1_05105	KPNRH_04320	VK055_RS11415	ecl8_04031		No	No	No	No
930	KPNIH1_05110	KPNRH_04319	VK055_RS11410	ecl8_04030		No	No	No	No
931	KPNIH1_05115	KPNRH_04318	VK055_RS11400	ecl8_04029		No	No	No	No
932	KPNIH1_05120	KPNRH_04317	VK055_RS11395	ecl8_04028		No	No	No	No
933	KPNIH1_05125	KPNRH_04316	VK055_RS11390	ecl8_04027		No	No	No	No
934	KPNIH1_05130	KPNRH_04315	VK055_RS11385	ecl8_04026		No	No	No	No
935	KPNIH1_05140	KPNRH_04313	VK055_RS11365	ecl8_04025		No	No	No	No
936	KPNIH1_05145	KPNRH_04312	VK055_RS11360	ecl8_04024		No	No	No	No
937	KPNIH1_05150	KPNRH_04311	VK055_RS11355	ecl8_04023		No	No	No	No
938	KPNIH1_05155	KPNRH_04310	VK055_RS11350	ecl8_04022		No	No	No	No
939	KPNIH1_05160	KPNRH_04309	VK055_RS11345	ecl8_04021		No	No	No	Yes
940	KPNIH1_05165	KPNRH_04308	VK055_RS11340	ecl8_04020		No	No	No	No
941	KPNIH1_05170	KPNRH_04307	VK055_RS11335	ecl8_04019		No	No	No	No
942	KPNIH1_05175	KPNRH_04306	VK055_RS11330	ecl8_04018		No	No	No	No
943	KPNIH1_05180	KPNRH_04305	VK055_RS11325	ecl8_04017		No	No	No	No
944	KPNIH1_05185	KPNRH_04304	VK055_RS11320	ecl8_04016		No	No	No	No
945	KPNIH1_05190	KPNRH_04303	VK055_RS11315	ecl8_04015		No	No	No	No
946	KPNIH1_05195	KPNRH_04302	VK055_RS11310	ecl8_04014		No	No	No	No
947	KPNIH1_05200	KPNRH_04301	VK055_RS11305	ecl8_04013		No	No	No	No
948	KPNIH1_05205	KPNRH_04300	VK055_RS11300	ecl8_04012		No	No	No	No
949	KPNIH1_05210	KPNRH_04299	VK055_RS29425	ecl8_04011		No	No	No	No
950	KPNIH1_05215	KPNRH_04298	VK055_RS11290	ecl8_04010		No	No	No	No
951	KPNIH1_05220	KPNRH_04297	VK055_RS11285	ecl8_04009		No	No	No	No
952	KPNIH1_05225	KPNRH_04296	VK055_RS11280	ecl8_04008		No	No	No	No
953	KPNIH1_05230	KPNRH_04295	VK055_RS11275	ecl8_04007		No	No	No	No
954	KPNIH1_05235	KPNRH_04294	VK055_RS11270	ecl8_04006		No	No	No	No
955	KPNIH1_05240	KPNRH_04293	VK055_RS11260	ecl8_04005		No	No	No	No
956	KPNIH1_05245	KPNRH_04292	VK055_RS11255	ecl8_04004		No	No	No	No
957	KPNIH1_05250	KPNRH_04291	VK055_RS11250	ecl8_04003		No	No	No	No
958	KPNIH1_05260	KPNRH_04290	VK055_RS11240	ecl8_04002		No	No	No	No
959	KPNIH1_05265	KPNRH_04289	VK055_RS11235	ecl8_04001		No	No	No	No
960	KPNIH1_05270	KPNRH_04288	VK055_RS11230	ecl8_04000		No	No	No	No
961	KPNIH1_05275	KPNRH_04287	VK055_RS11225	ecl8_03999		No	No	No	No
962	KPNIH1_05280	KPNRH_04286	VK055_RS11220	ecl8_03998		No	No	No	No
963	KPNIH1_05285	KPNRH_04285	VK055_RS11215	ecl8_03997		No	No	No	No
964	KPNIH1_05290	KPNRH_04284	VK055_RS11210	ecl8_03996		No	No	No	No
965	KPNIH1_05295	KPNRH_04283	VK055_RS11205	ecl8_03995		Yes	Yes	Yes	No
966	KPNIH1_05300	KPNRH_04282	VK055_RS11200	ecl8_03994		No	No	No	No
967	KPNIH1_05305	KPNRH_04281	VK055_RS11195	ecl8_03993		Yes	No	No	No
968	KPNIH1_05310	KPNRH_04280	VK055_RS11190	ecl8_03992		No	No	No	No
969	KPNIH1_05315	KPNRH_04279	VK055_RS11185	ecl8_03991		No	No	No	No
970	KPNIH1_05320	KPNRH_04278	VK055_RS11180	ecl8_03990		No	No	No	No
971	KPNIH1_05325	KPNRH_04277	VK055_RS11175	ecl8_03989		Yes	No	No	No
972	KPNIH1_05330	KPNRH_04276	VK055_RS11170	ecl8_03988		No	No	No	No
973	KPNIH1_05335	KPNRH_04275	VK055_RS11165	ecl8_03987		No	No	No	No
974	KPNIH1_05345	KPNRH_04273	VK055_RS11155	ecl8_03985		No	No	No	No
975	KPNIH1_05350	KPNRH_04272	VK055_RS11150	ecl8_03984		No	No	No	No
976	KPNIH1_05355	KPNRH_04271	VK055_RS11145	ecl8_03983		No	No	No	No
977	KPNIH1_05360	KPNRH_04270	VK055_RS11140	ecl8_03982		No	No	No	No
978	KPNIH1_05365	KPNRH_04269	VK055_RS11135	ecl8_03981		No	No	No	No
979	KPNIH1_05370	KPNRH_04268	VK055_RS11130	ecl8_03980		No	No	No	No
980	KPNIH1_05375	KPNRH_04267	VK055_RS11125	ecl8_03979		No	No	No	No
981	KPNIH1_05380	KPNRH_04266	VK055_RS11120	ecl8_03978		No	No	No	No
982	KPNIH1_05385	KPNRH_04265	VK055_RS11115	ecl8_03977		No	No	No	No
983	KPNIH1_05390	KPNRH_04264	VK055_RS11110	ecl8_03976		Yes	No	No	No
984	KPNIH1_05395	KPNRH_04263	VK055_RS11105	ecl8_03975		No	No	No	No
985	KPNIH1_05400	KPNRH_04262	VK055_RS11100	ecl8_03974		No	No	No	No
986	KPNIH1_05405	KPNRH_04261	VK055_RS11095	ecl8_03973		No	No	No	No
987	KPNIH1_05410	KPNRH_04260	VK055_RS11090	ecl8_03972		No	No	No	No
988	KPNIH1_05415	KPNRH_04259	VK055_RS11085	ecl8_03971		No	No	No	No
989	KPNIH1_05420	KPNRH_04258	VK055_RS11080	ecl8_03970		No	No	No	No
990	KPNIH1_05425	KPNRH_04257	VK055_RS11075	ecl8_03969		No	No	No	No
991	KPNIH1_05430	KPNRH_04256	VK055_RS11070	ecl8_03968		No	No	No	No
992	KPNIH1_05435	KPNRH_04255	VK055_RS11065	ecl8_03967		No	No	No	No
993	KPNIH1_05440	KPNRH_04254	VK055_RS11060	ecl8_03966		No	No	No	No
994	KPNIH1_05450	KPNRH_04252	VK055_RS11055	ecl8_03965		No	No	No	No
995	KPNIH1_05455	KPNRH_04251	VK055_RS11050	ecl8_03964		No	No	No	No
996	KPNIH1_05460	KPNRH_04250	VK055_RS11045	ecl8_03963		No	No	No	No
997	KPNIH1_05465	KPNRH_04249	VK055_RS11040	ecl8_03962		No	No	No	No
998	KPNIH1_05470	KPNRH_04248	VK055_RS11035	ecl8_03961		No	No	No	No
999	KPNIH1_05475	KPNRH_04247	VK055_RS11030	ecl8_03960		No	No	No	No
1000	KPNIH1_05480	KPNRH_04246	VK055_RS11025	ecl8_03959		No	No	No	No
1001	KPNIH1_05485	KPNRH_04245	VK055_RS11020	ecl8_03958		No	No	No	No
1002	KPNIH1_05495	KPNRH_04244	VK055_RS11010	ecl8_03957		No	No	No	No
1003	KPNIH1_05500	KPNRH_04243	VK055_RS11005	ecl8_03956		No	No	No	No
1004	KPNIH1_05505	KPNRH_04242	VK055_RS10995	ecl8_03955		No	No	No	No
1005	KPNIH1_05510	KPNRH_04241	VK055_RS10990	ecl8_03954		No	No	No	No
1006	KPNIH1_05515	KPNRH_04240	VK055_RS10985	ecl8_03953		Yes	No	Yes	Yes
1007	KPNIH1_05520	KPNRH_04239	VK055_RS10980	ecl8_03952		Yes	Yes	Yes	Yes
1008	KPNIH1_05525	KPNRH_04238	VK055_RS10975	ecl8_03951		Yes	Yes	Yes	Yes
1009	KPNIH1_05530	KPNRH_04237	VK055_RS10970	ecl8_03950		No	No	No	No
1010	KPNIH1_05535	KPNRH_04236	VK055_RS10965	ecl8_03949		No	No	No	No
1011	KPNIH1_05540	KPNRH_04235	VK055_RS10960	ecl8_03948		No	No	No	No
1012	KPNIH1_05545	KPNRH_04234	VK055_RS10955	ecl8_03947		No	No	No	No
1013	KPNIH1_05550	KPNRH_04233	VK055_RS10950	ecl8_03946		No	No	Yes	No
1014	KPNIH1_05555	KPNRH_04232	VK055_RS10945	ecl8_03945		Yes	Yes	Yes	Yes
1015	KPNIH1_05560	KPNRH_04231	VK055_RS10940	ecl8_03944		Yes	Yes	Yes	Yes
1016	KPNIH1_05565	KPNRH_04230	VK055_RS10935	ecl8_03943		Yes	Yes	Yes	Yes
1017	KPNIH1_05570	KPNRH_04229	VK055_RS10930	ecl8_03942		Yes	No	Yes	Yes
1018	KPNIH1_05575	KPNRH_04228	VK055_RS10925	ecl8_03941		No	No	No	No
1019	KPNIH1_05580	KPNRH_04227	VK055_RS10920	ecl8_03940		No	No	No	No
1020	KPNIH1_05585	KPNRH_04226	VK055_RS10915	ecl8_03939		Yes	Yes	Yes	Yes
1021	KPNIH1_05590	KPNRH_04225	VK055_RS10910	ecl8_03938		No	Yes	Yes	Yes
1022	KPNIH1_05595	KPNRH_04224	VK055_RS10905	ecl8_03937		No	No	Yes	No
1023	KPNIH1_05600	KPNRH_04223	VK055_RS10900	ecl8_03936		No	No	No	No
1024	KPNIH1_05605	KPNRH_04222	VK055_RS10895	ecl8_03935		No	No	No	No
1025	KPNIH1_05610	KPNRH_04221	VK055_RS10890	ecl8_03934		No	No	No	No
1026	KPNIH1_05615	KPNRH_04220	VK055_RS10885	ecl8_03933		No	No	No	No
1027	KPNIH1_05620	KPNRH_04219	VK055_RS10880	ecl8_03932		No	No	No	No
1028	KPNIH1_05625	KPNRH_04218	VK055_RS10875	ecl8_03931		No	No	No	No
1029	KPNIH1_05630	KPNRH_04217	VK055_RS10870	ecl8_03930		No	No	No	No
1030	KPNIH1_05635	KPNRH_04216	VK055_RS10865	ecl8_03929		No	No	No	No
1031	KPNIH1_05640	KPNRH_04215	VK055_RS10860	ecl8_03928		No	No	No	No
1032	KPNIH1_05645	KPNRH_04214	VK055_RS10855	ecl8_03927		No	No	No	No
1033	KPNIH1_05650	KPNRH_04213	VK055_RS10850	ecl8_03926		No	No	No	No
1034	KPNIH1_05655	KPNRH_04212	VK055_RS10845	ecl8_03925		No	No	No	No
1035	KPNIH1_05660	KPNRH_04211	VK055_RS10840	ecl8_03924		No	No	No	No
1036	KPNIH1_05665	KPNRH_04210	VK055_RS10835	ecl8_03923		No	No	No	No
1037	KPNIH1_05670	KPNRH_04209	VK055_RS10830	ecl8_03922		No	No	No	No
1038	KPNIH1_05675	KPNRH_04208	VK055_RS10825	ecl8_03921		No	No	No	No
1039	KPNIH1_05680	KPNRH_04207	VK055_RS10820	ecl8_03920		Yes	No	No	No
1040	KPNIH1_05685	KPNRH_04206	VK055_RS10815	ecl8_03919		No	No	No	No
1041	KPNIH1_05690	KPNRH_04205	VK055_RS10810	ecl8_03918		No	No	No	No
1042	KPNIH1_05695	KPNRH_04204;KPNRH_05271	VK055_RS10805	ecl8_03917		No	No	No	No
1043	KPNIH1_05700	KPNRH_04203	VK055_RS10800	ecl8_03916		No	No	No	No
1044	KPNIH1_05705	KPNRH_04202	VK055_RS10795	ecl8_03915		No	No	No	No
1045	KPNIH1_05710	KPNRH_04201	VK055_RS10790	ecl8_03914		No	No	No	No
1046	KPNIH1_05715					Yes	No	No	No
1047	KPNIH1_05720	KPNRH_04200	VK055_RS10785	ecl8_03913		No	No	No	No
1048	KPNIH1_05725	KPNRH_04199	VK055_RS10780	ecl8_03912		No	No	No	No
1049	KPNIH1_05730	KPNRH_04198	VK055_RS10775	ecl8_03911		No	No	No	No
1050	KPNIH1_05735	KPNRH_04196	VK055_RS10770	ecl8_03910		No	No	No	No
1051	KPNIH1_05740	KPNRH_04194;KPNRH_04195	VK055_RS10765	ecl8_03909		No	No	No	No
1052	KPNIH1_05745	KPNRH_04193	VK055_RS10760	ecl8_03908		No	No	No	No
1053	KPNIH1_05750	KPNRH_04192	VK055_RS10755	ecl8_03907		No	No	No	No
1054	KPNIH1_05755	KPNRH_04191	VK055_RS10750	ecl8_03906		No	No	No	No
1055	KPNIH1_05760	KPNRH_04190	VK055_RS10745	ecl8_03905		No	No	No	No
1056	KPNIH1_05765	KPNRH_04189	VK055_RS10740	ecl8_03904		No	No	No	No
1057	KPNIH1_05770	KPNRH_04188	VK055_RS10735	ecl8_03903		No	No	No	No
1058	KPNIH1_05775	KPNRH_04187	VK055_RS10730	ecl8_03902		No	No	No	No
1059	KPNIH1_05780	KPNRH_04186	VK055_RS10725	ecl8_03901		No	No	No	No
1060	KPNIH1_05785	KPNRH_04185	VK055_RS10720	ecl8_03900		No	No	No	No
1061	KPNIH1_05790	KPNRH_04184	VK055_RS10715	ecl8_03899		No	No	No	No
1062	KPNIH1_05800	KPNRH_04183	VK055_RS10710	ecl8_03898		No	No	No	No
1063	KPNIH1_05805	KPNRH_04182	VK055_RS10705	ecl8_03897		No	No	No	No
1064	KPNIH1_05810	KPNRH_04181	VK055_RS10700	ecl8_03896		No	No	No	No
1065	KPNIH1_05815	KPNRH_04180	VK055_RS10695	ecl8_03895		No	No	No	No
1066	KPNIH1_05820	KPNRH_04179	VK055_RS10690	ecl8_03894		No	No	No	No
1067	KPNIH1_05825	KPNRH_04178	VK055_RS10685	ecl8_03893		No	No	No	No
1068	KPNIH1_05830	KPNRH_04176	VK055_RS10680	ecl8_03892		No	No	No	No
1069	KPNIH1_05835	KPNRH_04175	VK055_RS10675	ecl8_03891		No	No	No	No
1070	KPNIH1_05840	KPNRH_04174	VK055_RS10670	ecl8_03890		No	No	No	No
1071	KPNIH1_05845	KPNRH_04173	VK055_RS10665	ecl8_03889		No	No	No	No
1072	KPNIH1_05850	KPNRH_04172	VK055_RS10660	ecl8_03888		No	No	No	No
1073	KPNIH1_05855	KPNRH_04171	VK055_RS10655	ecl8_03887		No	No	No	No
1074	KPNIH1_05860	KPNRH_04170	VK055_RS10650	ecl8_03886		No	No	No	No
1075	KPNIH1_05865	KPNRH_04169	VK055_RS10645	ecl8_03885		No	No	No	No
1076	KPNIH1_05870	KPNRH_04168	VK055_RS10635	ecl8_03884		No	No	No	No
1077	KPNIH1_05875	KPNRH_04167	VK055_RS10630	ecl8_03883		No	No	No	No
1078	KPNIH1_05880	KPNRH_04166	VK055_RS10625	ecl8_03882		No	No	No	No
1079	KPNIH1_05885	KPNRH_04165	VK055_RS10620	ecl8_03881		No	No	No	No
1080	KPNIH1_05890	KPNRH_04164	VK055_RS10615	ecl8_03880		No	No	No	No
1081	KPNIH1_05895	KPNRH_04163	VK055_RS10610	ecl8_03879		No	No	No	No
1082	KPNIH1_05900	KPNRH_04162	VK055_RS10605	ecl8_03878		No	No	No	No
1083	KPNIH1_05905	KPNRH_04161	VK055_RS10600	ecl8_03877		No	No	No	No
1084	KPNIH1_05910	KPNRH_04160	VK055_RS10595	ecl8_03876		No	No	No	No
1085	KPNIH1_05915	KPNRH_04159	VK055_RS10590	ecl8_03875		Yes	No	No	No
1086	KPNIH1_05920	KPNRH_04158	VK055_RS10585	ecl8_03874		No	No	No	No
1087	KPNIH1_05925	KPNRH_04157	VK055_RS10580	ecl8_03873		No	No	No	No
1088	KPNIH1_05930	KPNRH_04156	VK055_RS10575	ecl8_03872		No	No	No	No
1089	KPNIH1_05935	KPNRH_04155	VK055_RS10565	ecl8_03871		No	No	No	No
1090	KPNIH1_05940	KPNRH_04154	VK055_RS10560	ecl8_03870		No	No	No	No
1091	KPNIH1_05945	KPNRH_04153	VK055_RS10555	ecl8_03869		No	No	No	No
1092	KPNIH1_05950	KPNRH_04152	VK055_RS10550	ecl8_03868		No	Yes	No	No
1093	KPNIH1_05955	KPNRH_04151	VK055_RS10545	ecl8_03867		No	Yes	No	No
1094	KPNIH1_05960	KPNRH_04150	VK055_RS10540	ecl8_03866		No	No	No	No
1095	KPNIH1_05965	KPNRH_04149	VK055_RS10535	ecl8_03865		No	No	No	No
1096	KPNIH1_05970	KPNRH_04148	VK055_RS10530	ecl8_03864		No	No	No	No
1097	KPNIH1_05980	KPNRH_04146	VK055_RS10520	ecl8_03862		No	No	No	No
1098	KPNIH1_05985	KPNRH_04145	VK055_RS10515	ecl8_03861		No	No	No	No
1099	KPNIH1_05990	KPNRH_04144	VK055_RS10510	ecl8_03860		No	No	No	No
1100	KPNIH1_05995;KPNIH1_10915	KPNRH_03059;KPNRH_04142;KPNRH_04143	VK055_RS10505	ecl8_03859		Yes	Yes	Yes	Yes
1101	KPNIH1_06000	KPNRH_04141	VK055_RS10500	ecl8_03858		Yes	No	No	No
1102	KPNIH1_06005	KPNRH_04140	VK055_RS10495	ecl8_03857		No	No	No	No
1103	KPNIH1_06010	KPNRH_04139	VK055_RS10490	ecl8_03856		No	No	No	No
1104	KPNIH1_06015	KPNRH_04138	VK055_RS10485	ecl8_03855		Yes	Yes	Yes	Yes
1105	KPNIH1_06020	KPNRH_04137	VK055_RS10480	ecl8_03854		Yes	Yes	Yes	Yes
1106	KPNIH1_06025	KPNRH_04136	VK055_RS10475	ecl8_03853		No	No	No	No
1107	KPNIH1_06030	KPNRH_04135	VK055_RS10470	ecl8_03852		No	No	No	No
1108	KPNIH1_06040	KPNRH_04134	VK055_RS10455	ecl8_03851		No	No	No	No
1109	KPNIH1_06045	KPNRH_04133	VK055_RS10450	ecl8_03850		No	No	No	No
1110	KPNIH1_06050	KPNRH_04132	VK055_RS10445	ecl8_03849		No	No	No	No
1111	KPNIH1_06055	KPNRH_04130	VK055_RS10440	ecl8_03848		No	No	No	No
1112	KPNIH1_06060	KPNRH_04129	VK055_RS10435	ecl8_03847		No	No	No	No
1113	KPNIH1_06065	KPNRH_04128	VK055_RS10430	ecl8_03846		No	No	No	No
1114	KPNIH1_06075;KPNIH1_06070	KPNRH_04127	VK055_RS10420;VK055_RS10425	ecl8_03844;ecl8_03845		No	No	No	No
1115	KPNIH1_06080	KPNRH_04126	VK055_RS10415	ecl8_03843		No	No	No	No
1116	KPNIH1_06085	KPNRH_04125	VK055_RS10410	ecl8_03842		No	No	No	No
1117	KPNIH1_06090	KPNRH_04124	VK055_RS10405	ecl8_03841		No	No	No	No
1118	KPNIH1_06095	KPNRH_04123	VK055_RS10400	ecl8_03840		No	No	No	No
1119	KPNIH1_06100;KPNIH1_06105	KPNRH_04122	VK055_RS10390;VK055_RS10395	ecl8_03838;ecl8_03839		No	No	No	No
1120	KPNIH1_06110	KPNRH_04121	VK055_RS10385	ecl8_03837		No	No	No	No
1121	KPNIH1_06115	KPNRH_04120	VK055_RS10375	ecl8_03836		No	No	No	No
1122	KPNIH1_06120	KPNRH_04119	VK055_RS10370	ecl8_03835		No	No	No	No
1123	KPNIH1_06125	KPNRH_04118	VK055_RS10365	ecl8_03834		No	No	No	No
1124	KPNIH1_06130	KPNRH_04117	VK055_RS10360	ecl8_03833		No	No	No	No
1125	KPNIH1_06135	KPNRH_04116	VK055_RS10355	ecl8_03832		No	No	No	No
1126	KPNIH1_06140	KPNRH_04115	VK055_RS10350	ecl8_03831		Yes	Yes	Yes	Yes
1127	KPNIH1_06145	KPNRH_04114	VK055_RS10345	ecl8_03830		Yes	No	Yes	Yes
1128	KPNIH1_06150	KPNRH_04113	VK055_RS10340	ecl8_03829		Yes	Yes	Yes	Yes
1129	KPNIH1_06155	KPNRH_04112	VK055_RS10335	ecl8_03828		Yes	No	No	No
1130	KPNIH1_06160	KPNRH_04111	VK055_RS10330	ecl8_03827		Yes	Yes	Yes	Yes
1131	KPNIH1_06165					No	No	No	No
1132	KPNIH1_06170	KPNRH_04109		ecl8_03825		No	No	No	No
1133	KPNIH1_06175	KPNRH_04108		ecl8_03824		Yes	No	No	No
1134	KPNIH1_06180	KPNRH_04107				Yes	Yes	No	No
1135	KPNIH1_06185	KPNRH_04106				No	No	No	No
1136	KPNIH1_06190;KPNIH1_10890	KPNRH_03107;KPNRH_04105		ecl8_03821		No	No	No	No
1137	KPNIH1_06195	KPNRH_03105;KPNRH_04103		ecl8_03819		No	No	No	No
1138	KPNIH1_06200	KPNRH_03104;KPNRH_04102		ecl8_03818		No	No	No	No
1139	KPNIH1_06205	KPNRH_04101		ecl8_03817		No	Yes	No	No
1140	KPNIH1_06225	KPNRH_04098				Yes	Yes	No	No
1141	KPNIH1_06230	KPNRH_03097;KPNRH_04096		ecl8_03805		No	Yes	No	No
1142	KPNIH1_06240	KPNRH_04094				No	No	No	No
1143	KPNIH1_06245	KPNRH_04093				No	No	No	No
1144	KPNIH1_06250	KPNRH_04092				No	No	No	No
1145	KPNIH1_06255	KPNRH_04091				No	No	No	No
1146	KPNIH1_06260	KPNRH_04089				No	No	No	No
1147	KPNIH1_06270	KPNRH_04088				No	No	No	No
1148	KPNIH1_06275					No	No	No	No
1149	KPNIH1_06280	KPNRH_04087				No	No	No	No
1150	KPNIH1_06290	KPNRH_03089;KPNRH_04085				No	No	No	No
1151	KPNIH1_06300	KPNRH_04083				No	No	No	No
1152	KPNIH1_06305	KPNRH_03087;KPNRH_04082				No	No	No	No
1153	KPNIH1_06310					No	No	No	No
1154	KPNIH1_06315;KPNIH1_11320	KPNRH_02996;KPNRH_04079				No	No	No	No
1155	KPNIH1_06320;KPNIH1_11325	KPNRH_02995;KPNRH_04078				No	No	No	No
1156	KPNIH1_06325	KPNRH_04077				No	No	No	No
1157	KPNIH1_06330	KPNRH_04076				No	No	No	No
1158	KPNIH1_06340	KPNRH_04074				No	No	No	No
1159	KPNIH1_06345	KPNRH_04073				No	No	No	No
1160	KPNIH1_06350	KPNRH_04072				No	No	No	No
1161	KPNIH1_06355	KPNRH_04071				No	No	No	No
1162	KPNIH1_06360	KPNRH_04070				No	No	No	No
1163	KPNIH1_06365	KPNRH_04069				No	No	No	No
1164	KPNIH1_06370	KPNRH_04068				No	No	No	No
1165	KPNIH1_06375	KPNRH_04067				No	No	No	No
1166	KPNIH1_06380	KPNRH_04066				No	No	No	No
1167	KPNIH1_06385	KPNRH_04065				No	No	No	No
1168	KPNIH1_06395	KPNRH_04063		ecl8_03769		No	No	No	No
1169	KPNIH1_06400	KPNRH_04062				No	No	No	No
1170	KPNIH1_06405	KPNRH_04061				No	No	No	No
1171	KPNIH1_06410	KPNRH_04060				No	No	No	No
1172	KPNIH1_06415	KPNRH_04059				No	No	No	No
1173	KPNIH1_06420	KPNRH_04058				No	No	No	No
1174	KPNIH1_06430	KPNRH_04056				No	No	No	No
1175	KPNIH1_06435	KPNRH_04055				Yes	Yes	No	No
1176	KPNIH1_06440	KPNRH_04053				No	No	No	No
1177	KPNIH1_06445	KPNRH_04052		ecl8_03760		No	No	No	No
1178	KPNIH1_06450	KPNRH_04051				No	No	No	No
1179	KPNIH1_06455	KPNRH_04050				No	No	No	No
1180	KPNIH1_06460	KPNRH_04049		ecl8_03757		No	No	No	No
1181	KPNIH1_06465	KPNRH_04048				No	No	No	No
1182	KPNIH1_06470	KPNRH_04047				No	No	No	No
1183	KPNIH1_06475	KPNRH_04046				No	No	No	No
1184	KPNIH1_06480;KPNIH1_08770;KPNIH1_10940;KPNIH1_11495	KPNRH_02962;KPNRH_03055;KPNRH_03591;KPNRH_04045;KPNRH_03591				No	No	No	No
1185	KPNIH1_06485	KPNRH_04044				No	No	No	No
1186	KPNIH1_06490;KPNIH1_11505	KPNRH_02960;KPNRH_04043				No	No	No	No
1187	KPNIH1_06495;KPNIH1_08595;KPNIH1_10265;KPNIH1_11020;KPNIH1_17265	KPNRH_01784;KPNRH_03046;KPNRH_03290;KPNRH_03624;KPNRH_04041				No	Yes	No	No
1188	KPNIH1_06500	KPNRH_04040				No	No	No	No
1189	KPNIH1_06505	KPNRH_04039				No	No	No	No
1190	KPNIH1_06510					No	No	No	No
1191	KPNIH1_06515	KPNRH_04038	VK055_RS10310	ecl8_03750		No	No	No	No
1192	KPNIH1_06520	KPNRH_04037	VK055_RS10305	ecl8_03749		No	No	No	No
1193	KPNIH1_06525	KPNRH_04036	VK055_RS10295	ecl8_03748		No	No	No	No
1194	KPNIH1_06530	KPNRH_04035		ecl8_03747		No	No	No	No
1195	KPNIH1_06535	KPNRH_04034		ecl8_03746		No	No	No	No
1196	KPNIH1_06540	KPNRH_04033		ecl8_03745		No	No	No	No
1197	KPNIH1_06545	KPNRH_04032		ecl8_03744		No	No	No	No
1198	KPNIH1_06550	KPNRH_04031		ecl8_03743		No	No	No	No
1199	KPNIH1_06555	KPNRH_04030		ecl8_03742		No	No	No	No
1200	KPNIH1_06560	KPNRH_04029	VK055_RS10290	ecl8_03741		No	No	No	No
1201	KPNIH1_06570	KPNRH_04027	VK055_RS10280	ecl8_03739		No	No	No	No
1202	KPNIH1_06575	KPNRH_04026	VK055_RS10275	ecl8_03738		No	No	No	No
1203	KPNIH1_06580	KPNRH_04025	VK055_RS10270	ecl8_03737		No	No	No	No
1204	KPNIH1_06585	KPNRH_04024	VK055_RS10265	ecl8_03736		No	No	No	No
1205	KPNIH1_06590	KPNRH_04023	VK055_RS10260	ecl8_03735		No	No	No	No
1206	KPNIH1_06595	KPNRH_04022	VK055_RS10255	ecl8_03734		No	No	No	No
1207	KPNIH1_06600	KPNRH_04021	VK055_RS10250	ecl8_03733		No	No	No	No
1208	KPNIH1_06605	KPNRH_04020	VK055_RS10245	ecl8_03732		No	No	No	No
1209	KPNIH1_06610	KPNRH_04019	VK055_RS10240	ecl8_03731		No	No	No	No
1210	KPNIH1_06615	KPNRH_04018	VK055_RS10235	ecl8_03730		No	No	No	No
1211	KPNIH1_06620	KPNRH_04017	VK055_RS10230	ecl8_03729		No	No	No	No
1212	KPNIH1_06625	KPNRH_04016	VK055_RS10225	ecl8_03728		No	No	No	No
1213	KPNIH1_06630	KPNRH_04015	VK055_RS10220	ecl8_03727		No	No	No	No
1214	KPNIH1_06635	KPNRH_04014	VK055_RS10215	ecl8_03726		No	No	No	No
1215	KPNIH1_06640	KPNRH_04013	VK055_RS10210	ecl8_03725		No	No	No	No
1216	KPNIH1_06645	KPNRH_04012	VK055_RS10200	ecl8_03724		No	No	No	No
1217	KPNIH1_06650	KPNRH_04011	VK055_RS10195	ecl8_03723		No	No	No	No
1218	KPNIH1_06655	KPNRH_04010	VK055_RS10190	ecl8_03722		No	No	No	No
1219	KPNIH1_06660	KPNRH_04009	VK055_RS10185	ecl8_03721		No	No	No	No
1220	KPNIH1_06665	KPNRH_04008	VK055_RS10180	ecl8_03720		No	No	No	No
1221	KPNIH1_06670	KPNRH_04007	VK055_RS10175	ecl8_03719		No	No	No	No
1222	KPNIH1_06675	KPNRH_04006	VK055_RS10165	ecl8_03718		No	No	No	No
1223	KPNIH1_06680	KPNRH_04005	VK055_RS10160	ecl8_03717		No	No	No	No
1224	KPNIH1_06685	KPNRH_04004	VK055_RS10155	ecl8_03716		No	No	No	No
1225	KPNIH1_06690	KPNRH_04003	VK055_RS10150	ecl8_03715		No	No	No	No
1226	KPNIH1_06695	KPNRH_04002	VK055_RS10145	ecl8_03714		No	No	No	No
1227	KPNIH1_06700	KPNRH_04001	VK055_RS10140	ecl8_03713		No	No	No	No
1228	KPNIH1_06705	KPNRH_04000	VK055_RS10130	ecl8_03712		No	No	No	No
1229	KPNIH1_06710	KPNRH_03999	VK055_RS10125	ecl8_03711		No	No	No	No
1230	KPNIH1_06720	KPNRH_03998	VK055_RS10110	ecl8_03710		No	No	No	No
1231	KPNIH1_06725	KPNRH_03997	VK055_RS10105	ecl8_03709		No	No	No	No
1232	KPNIH1_06730	KPNRH_03996	VK055_RS10100	ecl8_03708		No	No	No	No
1233	KPNIH1_06735	KPNRH_03995	VK055_RS10095	ecl8_03707		No	No	No	No
1234	KPNIH1_06740	KPNRH_03994	VK055_RS10090	ecl8_03706		No	No	No	No
1235	KPNIH1_06745	KPNRH_03993	VK055_RS10085	ecl8_03705		No	No	No	No
1236	KPNIH1_06750	KPNRH_03992	VK055_RS10080	ecl8_03704		No	No	No	No
1237	KPNIH1_06755	KPNRH_03991	VK055_RS10075	ecl8_03703		No	No	No	No
1238	KPNIH1_06760	KPNRH_03990	VK055_RS10070	ecl8_03702		No	No	No	No
1239	KPNIH1_06765	KPNRH_03989	VK055_RS10065	ecl8_03701		No	No	No	No
1240	KPNIH1_06770	KPNRH_03988	VK055_RS10050	ecl8_03698		No	No	No	No
1241	KPNIH1_06775	KPNRH_03987	VK055_RS10045	ecl8_03697		No	No	No	No
1242	KPNIH1_06780	KPNRH_03986	VK055_RS10040	ecl8_03696		No	No	No	No
1243	KPNIH1_06785	KPNRH_03985	VK055_RS10035	ecl8_03695		No	No	No	No
1244	KPNIH1_06790	KPNRH_03984	VK055_RS10030	ecl8_03694		No	No	No	No
1245	KPNIH1_06795	KPNRH_03983	VK055_RS10025	ecl8_03693		No	No	No	No
1246	KPNIH1_06800	KPNRH_03982	VK055_RS10020	ecl8_03692		No	No	No	No
1247	KPNIH1_06805	KPNRH_03981	VK055_RS10015	ecl8_03691		No	No	No	No
1248	KPNIH1_06810	KPNRH_03980	VK055_RS10010	ecl8_03690		No	No	No	No
1249	KPNIH1_06815	KPNRH_03979	VK055_RS10005	ecl8_03689		No	No	No	No
1250	KPNIH1_06820	KPNRH_03978	VK055_RS10000	ecl8_03688		No	No	No	No
1251	KPNIH1_06825	KPNRH_03977	VK055_RS09995	ecl8_03687		No	No	No	No
1252	KPNIH1_06830	KPNRH_03976				No	No	No	No
1253	KPNIH1_06835	KPNRH_03975				No	No	No	No
1254	KPNIH1_06840	KPNRH_03974				No	No	No	No
1255	KPNIH1_06845	KPNRH_03973				No	No	No	No
1256	KPNIH1_06850	KPNRH_03972				No	No	No	No
1257	KPNIH1_06855	KPNRH_03971				No	No	No	No
1258	KPNIH1_06860	KPNRH_03970				No	No	No	No
1259	KPNIH1_06865	KPNRH_03969				No	No	No	No
1260	KPNIH1_06870	KPNRH_03968	VK055_RS09990	ecl8_03686		No	No	No	No
1261	KPNIH1_06875	KPNRH_03967	VK055_RS09985;VK055_RS28310	ecl8_03685		No	No	No	No
1262	KPNIH1_06875;KPNIH1_08275;KPNIH1_08460;KPNIH1_16200;KPNIH1_16620;KPNIH1_22920	KPNRH_00675;KPNRH_01773;KPNRH_01959;KPNRH_02046;KPNRH_03652;KPNRH_03686;KPNRH_03967	VK055_RS00375;VK055_RS00830;VK055_RS08370;VK055_RS08550;VK055_RS09710;VK055_RS09985;VK055_RS20240;VK055_RS27990;VK055_RS28310	ecl8_00635;ecl8_01823;ecl8_01906;ecl8_03364;ecl8_03399;ecl8_03685;ecl8_04034		No	No	No	No
1263	KPNIH1_06880	KPNRH_03966	VK055_RS09980	ecl8_03684		No	No	No	No
1264	KPNIH1_06885	KPNRH_03965	VK055_RS09975	ecl8_03683		No	No	No	No
1265	KPNIH1_06890	KPNRH_03964	VK055_RS09970	ecl8_03682		No	No	No	No
1266	KPNIH1_06895	KPNRH_03963		ecl8_03681		No	No	No	No
1267	KPNIH1_06900	KPNRH_03962		ecl8_03680		No	No	No	No
1268	KPNIH1_06905	KPNRH_03961		ecl8_03679		No	No	No	No
1269	KPNIH1_06910	KPNRH_03960		ecl8_03678		No	No	No	No
1270	KPNIH1_06915	KPNRH_03959		ecl8_03677		No	No	No	No
1271	KPNIH1_06920	KPNRH_03958		ecl8_03676		No	No	No	No
1272	KPNIH1_06925	KPNRH_03957		ecl8_03675		Yes	No	No	No
1273	KPNIH1_06930	KPNRH_03956	VK055_RS09945	ecl8_03674		No	No	No	No
1274	KPNIH1_06935	KPNRH_03955	VK055_RS09940	ecl8_03673		No	No	No	No
1275	KPNIH1_06940	KPNRH_03954	VK055_RS09935	ecl8_03672		No	No	No	No
1276	KPNIH1_06945	KPNRH_03953	VK055_RS09930	ecl8_03671		No	No	No	No
1277	KPNIH1_06950	KPNRH_03952	VK055_RS09925	ecl8_03670		Yes	No	No	No
1278	KPNIH1_06955	KPNRH_03951	VK055_RS09920	ecl8_03669		No	No	No	No
1279	KPNIH1_06965					No	No	No	No
1280	KPNIH1_06970	KPNRH_03949	VK055_RS09910	ecl8_03667		No	No	No	No
1281	KPNIH1_06975	KPNRH_03948	VK055_RS09905	ecl8_03666		No	No	No	No
1282	KPNIH1_06980	KPNRH_03947	VK055_RS09900	ecl8_03665		No	No	No	No
1283	KPNIH1_06995	KPNRH_03944	VK055_RS09895	ecl8_03664		No	No	No	No
1284	KPNIH1_07000	KPNRH_03943	VK055_RS09890	ecl8_03663		No	No	No	No
1285	KPNIH1_07005	KPNRH_03942	VK055_RS09855	ecl8_03656		No	No	No	No
1286	KPNIH1_07010	KPNRH_03941	VK055_RS09850	ecl8_03655		No	No	No	No
1287	KPNIH1_07015	KPNRH_03940	VK055_RS09845	ecl8_03654		No	No	No	No
1288	KPNIH1_07020	KPNRH_03939	VK055_RS09840	ecl8_03653		No	No	No	No
1289	KPNIH1_07025	KPNRH_03938	VK055_RS09835	ecl8_03652		No	No	No	No
1290	KPNIH1_07030	KPNRH_03937	VK055_RS09830	ecl8_03651		No	No	No	No
1291	KPNIH1_07035	KPNRH_03936	VK055_RS09825	ecl8_03650		No	No	No	No
1292	KPNIH1_07040	KPNRH_03935	VK055_RS09820	ecl8_03649		No	No	No	No
1293	KPNIH1_07045	KPNRH_03934	VK055_RS09815	ecl8_03648		No	No	No	No
1294	KPNIH1_07050	KPNRH_03933	VK055_RS09810	ecl8_03644		Yes	No	No	No
1295	KPNIH1_07055	KPNRH_03932	VK055_RS09805	ecl8_03643		No	No	No	No
1296	KPNIH1_07060	KPNRH_03931	VK055_RS09800	ecl8_03642		No	No	No	No
1297	KPNIH1_07065	KPNRH_03930	VK055_RS09795	ecl8_03641		No	No	No	No
1298	KPNIH1_07070	KPNRH_03929	VK055_RS09790	ecl8_03640		No	No	No	No
1299	KPNIH1_07075	KPNRH_03928	VK055_RS09785	ecl8_03639		No	No	No	No
1300	KPNIH1_07080	KPNRH_03926;KPNRH_03927	VK055_RS09780	ecl8_03638		No	No	No	No
1301	KPNIH1_07085	KPNRH_03925	VK055_RS09775	ecl8_03637		No	No	No	No
1302	KPNIH1_07090	KPNRH_03924	VK055_RS09770	ecl8_03636		No	No	No	No
1303	KPNIH1_07095	KPNRH_03923	VK055_RS09765	ecl8_03635		No	No	No	No
1304	KPNIH1_07100	KPNRH_03922	VK055_RS09760	ecl8_03634		No	No	No	No
1305	KPNIH1_07105	KPNRH_03921	VK055_RS09755;VK055_RS29585	ecl8_03633		No	No	No	No
1306	KPNIH1_07110	KPNRH_03920	VK055_RS09750	ecl8_03632		No	No	No	No
1307	KPNIH1_07115	KPNRH_03919	VK055_RS09745	ecl8_03631		No	No	No	No
1308	KPNIH1_07120	KPNRH_03918		ecl8_03630		No	No	No	No
1309	KPNIH1_07125	KPNRH_03917		ecl8_03629		No	No	No	No
1310	KPNIH1_07130	KPNRH_03916		ecl8_03628		No	No	No	Yes
1311	KPNIH1_07135	KPNRH_03915		ecl8_03627		No	No	No	No
1312	KPNIH1_07140	KPNRH_03914		ecl8_03626		No	No	No	No
1313	KPNIH1_07145	KPNRH_03913		ecl8_03625		No	No	No	No
1314	KPNIH1_07150	KPNRH_03912		ecl8_03624		No	No	No	No
1315	KPNIH1_07155	KPNRH_03911		ecl8_03623		Yes	No	No	No
1316	KPNIH1_07160	KPNRH_03910		ecl8_03622		No	No	No	No
1317	KPNIH1_07165	KPNRH_03909		ecl8_03621		No	No	No	No
1318	KPNIH1_07170	KPNRH_03908	VK055_RS09690	ecl8_03620		No	No	No	No
1319	KPNIH1_07175	KPNRH_03907	VK055_RS09685	ecl8_03619		No	No	No	No
1320	KPNIH1_07180	KPNRH_03906	VK055_RS09680	ecl8_03618		No	No	No	No
1321	KPNIH1_07185	KPNRH_03905	VK055_RS09675	ecl8_03617		No	No	No	No
1322	KPNIH1_07190	KPNRH_03904	VK055_RS09670	ecl8_03616		No	No	No	No
1323	KPNIH1_07195	KPNRH_03903	VK055_RS09665	ecl8_03615		No	No	No	No
1324	KPNIH1_07200	KPNRH_03902	VK055_RS09660	ecl8_03614		No	No	No	No
1325	KPNIH1_07205	KPNRH_03901	VK055_RS09655	ecl8_03613		No	No	No	No
1326	KPNIH1_07210	KPNRH_03900	VK055_RS09650	ecl8_03612		No	No	No	No
1327	KPNIH1_07215	KPNRH_03899	VK055_RS09645	ecl8_03611		No	No	No	No
1328	KPNIH1_07220	KPNRH_03898	VK055_RS09640	ecl8_03610		No	No	No	No
1329	KPNIH1_07225	KPNRH_03897	VK055_RS09635	ecl8_03609		No	No	No	No
1330	KPNIH1_07230	KPNRH_03896	VK055_RS09630	ecl8_03608		No	No	No	No
1331	KPNIH1_07235	KPNRH_03895	VK055_RS09625	ecl8_03607		No	No	No	No
1332	KPNIH1_07240	KPNRH_03894	VK055_RS09620	ecl8_03606		Yes	No	No	No
1333	KPNIH1_07245	KPNRH_03893	VK055_RS09615	ecl8_03605		No	No	No	No
1334	KPNIH1_07250	KPNRH_03892	VK055_RS09610	ecl8_03604		No	No	No	No
1335	KPNIH1_07255	KPNRH_03891	VK055_RS09605	ecl8_03603		Yes	No	No	No
1336	KPNIH1_07260	KPNRH_03890	VK055_RS09600	ecl8_03602		No	No	No	No
1337	KPNIH1_07265	KPNRH_03889	VK055_RS09595	ecl8_03601		No	No	No	No
1338	KPNIH1_07270	KPNRH_03888	VK055_RS09590	ecl8_03600		No	No	No	No
1339	KPNIH1_07280	KPNRH_03887	VK055_RS09585	ecl8_03599		No	No	No	No
1340	KPNIH1_07285	KPNRH_03886	VK055_RS09580	ecl8_03598		No	No	No	No
1341	KPNIH1_07290	KPNRH_03885	VK055_RS09575	ecl8_03597		No	No	No	No
1342	KPNIH1_07295	KPNRH_03884	VK055_RS09570	ecl8_03596		No	No	No	No
1343	KPNIH1_07300	KPNRH_03883	VK055_RS09555	ecl8_03595		No	No	No	No
1344	KPNIH1_07305	KPNRH_03882	VK055_RS09550	ecl8_03594		No	No	No	No
1345	KPNIH1_07310	KPNRH_03881	VK055_RS09545	ecl8_03593		No	No	No	No
1346	KPNIH1_07315	KPNRH_03880	VK055_RS09540	ecl8_03592		No	No	No	No
1347	KPNIH1_07320	KPNRH_03879	VK055_RS09535	ecl8_03591		No	No	No	No
1348	KPNIH1_07325	KPNRH_03878	VK055_RS09530	ecl8_03590		No	No	No	No
1349	KPNIH1_07330	KPNRH_03877	VK055_RS09525	ecl8_03589		No	No	No	No
1350	KPNIH1_07335	KPNRH_03876	VK055_RS09520	ecl8_03588		No	No	No	No
1351	KPNIH1_07340	KPNRH_03875	VK055_RS09515	ecl8_03587		No	No	No	No
1352	KPNIH1_07345	KPNRH_03874	VK055_RS09510	ecl8_03586		No	No	No	No
1353	KPNIH1_07350	KPNRH_03873	VK055_RS09505	ecl8_03585		No	No	No	No
1354	KPNIH1_07355	KPNRH_03872	VK055_RS09500	ecl8_03584		No	No	No	No
1355	KPNIH1_07360	KPNRH_03871	VK055_RS09495	ecl8_03583		No	No	No	No
1356	KPNIH1_07365	KPNRH_03870	VK055_RS09490	ecl8_03582		No	No	No	No
1357	KPNIH1_07370	KPNRH_03869	VK055_RS09485	ecl8_03581		No	No	No	No
1358	KPNIH1_07375	KPNRH_03868	VK055_RS09480	ecl8_03580		No	No	No	No
1359	KPNIH1_07380	KPNRH_03867	VK055_RS09475	ecl8_03579		No	No	No	No
1360	KPNIH1_07385	KPNRH_03866	VK055_RS09470	ecl8_03578		No	No	No	No
1361	KPNIH1_07390	KPNRH_03865	VK055_RS09465	ecl8_03577		Yes	No	No	No
1362	KPNIH1_07395	KPNRH_03864	VK055_RS09460	ecl8_03576		No	No	No	No
1363	KPNIH1_07400	KPNRH_03863	VK055_RS09455	ecl8_03575		No	No	No	No
1364	KPNIH1_07405	KPNRH_03862	VK055_RS09450	ecl8_03574		No	No	No	No
1365	KPNIH1_07410	KPNRH_03861	VK055_RS09445	ecl8_03573		No	No	No	No
1366	KPNIH1_07415	KPNRH_03860	VK055_RS09440	ecl8_03572		No	No	No	No
1367	KPNIH1_07420	KPNRH_03859	VK055_RS09435	ecl8_03571		No	No	No	No
1368	KPNIH1_07425	KPNRH_03857	VK055_RS09430	ecl8_03570		Yes	No	No	No
1369	KPNIH1_07430	KPNRH_03856	VK055_RS09425	ecl8_03569		No	No	No	No
1370	KPNIH1_07435	KPNRH_03855	VK055_RS09420	ecl8_03568		No	No	No	No
1371	KPNIH1_07440	KPNRH_03854	VK055_RS09415	ecl8_03567		No	No	No	No
1372	KPNIH1_07445	KPNRH_03852	VK055_RS09410	ecl8_03566		No	No	No	No
1373	KPNIH1_07450	KPNRH_03851	VK055_RS09405	ecl8_03565		No	No	No	No
1374	KPNIH1_07455	KPNRH_03850	VK055_RS09400	ecl8_03564		No	No	No	No
1375	KPNIH1_07460	KPNRH_03848;KPNRH_03849	VK055_RS09395	ecl8_03563		No	No	No	No
1376	KPNIH1_07465	KPNRH_03847	VK055_RS09390	ecl8_03562		No	No	No	No
1377	KPNIH1_07470	KPNRH_03846	VK055_RS09385	ecl8_03561		No	No	No	No
1378	KPNIH1_07475	KPNRH_03845	VK055_RS09380	ecl8_03560		No	No	No	No
1379	KPNIH1_07480	KPNRH_03844	VK055_RS09375	ecl8_03559		No	Yes	Yes	Yes
1380	KPNIH1_07485	KPNRH_03843	VK055_RS09370	ecl8_03558		No	No	No	No
1381	KPNIH1_07490	KPNRH_03842	VK055_RS09365	ecl8_03557		No	Yes	No	Yes
1382	KPNIH1_07495	KPNRH_03841	VK055_RS09360	ecl8_03556		No	Yes	No	Yes
1383	KPNIH1_07500	KPNRH_03840	VK055_RS09355	ecl8_03555		No	No	No	No
1384	KPNIH1_07505	KPNRH_03839	VK055_RS09350	ecl8_03554		No	No	No	No
1385	KPNIH1_07510	KPNRH_03838	VK055_RS09345	ecl8_03553		No	Yes	Yes	Yes
1386	KPNIH1_07515	KPNRH_03837	VK055_RS09340	ecl8_03552		No	Yes	Yes	Yes
1387	KPNIH1_07520	KPNRH_03836	VK055_RS09335	ecl8_03551		No	No	Yes	No
1388	KPNIH1_07525	KPNRH_03835	VK055_RS09330	ecl8_03550		Yes	No	Yes	No
1389	KPNIH1_07530	KPNRH_03834	VK055_RS09325	ecl8_03549		No	No	No	No
1390	KPNIH1_07535	KPNRH_03833	VK055_RS09320	ecl8_03548		Yes	No	Yes	Yes
1391	KPNIH1_07540	KPNRH_03832	VK055_RS09315	ecl8_03547		Yes	Yes	Yes	Yes
1392	KPNIH1_07545	KPNRH_03831	VK055_RS09310	ecl8_03546		Yes	Yes	Yes	Yes
1393	KPNIH1_07550	KPNRH_03830	VK055_RS09305	ecl8_03545		Yes	Yes	Yes	Yes
1394	KPNIH1_07555	KPNRH_03829	VK055_RS09300	ecl8_03544		No	No	No	No
1395	KPNIH1_07560	KPNRH_03828	VK055_RS09295	ecl8_03543		No	No	No	No
1396	KPNIH1_07565	KPNRH_03827	VK055_RS09290	ecl8_03542		No	No	No	No
1397	KPNIH1_07570	KPNRH_03826	VK055_RS09280	ecl8_03541		No	No	No	No
1398	KPNIH1_07575	KPNRH_03825	VK055_RS09275	ecl8_03540		No	No	No	No
1399	KPNIH1_07580	KPNRH_03824	VK055_RS09270	ecl8_03539		No	No	No	No
1400	KPNIH1_07585	KPNRH_03822	VK055_RS09265	ecl8_03538		No	No	No	No
1401	KPNIH1_07590	KPNRH_03821	VK055_RS09260	ecl8_03537		Yes	Yes	Yes	Yes
1402	KPNIH1_07595	KPNRH_03820	VK055_RS09255	ecl8_03536		No	No	No	No
1403	KPNIH1_07600	KPNRH_03819	VK055_RS09250	ecl8_03535		Yes	Yes	Yes	Yes
1404	KPNIH1_07605	KPNRH_03818	VK055_RS09245	ecl8_03534		No	No	Yes	No
1405	KPNIH1_07610	KPNRH_03817	VK055_RS09240	ecl8_03533		No	No	No	No
1406	KPNIH1_07615	KPNRH_03816	VK055_RS09235	ecl8_03532		No	Yes	Yes	Yes
1407	KPNIH1_07620;KPNIH1_07625;KPNIH1_07635;KPNIH1_07640					No	No	No	No
1408	KPNIH1_07630;KPNIH1_07650					No	No	No	No
1409	KPNIH1_07645					No	No	No	No
1410	KPNIH1_07660	KPNRH_03808	VK055_RS09195	ecl8_03524		No	No	No	No
1411	KPNIH1_07665	KPNRH_03807	VK055_RS09190	ecl8_03523		No	No	No	No
1412	KPNIH1_07670	KPNRH_03806	VK055_RS09185	ecl8_03522		No	No	No	No
1413	KPNIH1_07675	KPNRH_03805	VK055_RS09180	ecl8_03521		No	No	No	No
1414	KPNIH1_07680	KPNRH_03804	VK055_RS09175	ecl8_03520		No	No	No	No
1415	KPNIH1_07685	KPNRH_03803	VK055_RS09170	ecl8_03519		No	No	No	No
1416	KPNIH1_07690	KPNRH_03802	VK055_RS09165	ecl8_03518		Yes	Yes	Yes	Yes
1417	KPNIH1_07695	KPNRH_03801	VK055_RS09160	ecl8_03517		No	No	No	No
1418	KPNIH1_07700	KPNRH_03800	VK055_RS09155	ecl8_03516		No	No	No	No
1419	KPNIH1_07705	KPNRH_03799	VK055_RS09150	ecl8_03515		No	No	No	No
1420	KPNIH1_07710	KPNRH_03798	VK055_RS09140	ecl8_03513		No	Yes	Yes	No
1421	KPNIH1_07715	KPNRH_03797	VK055_RS09135	ecl8_03512		Yes	Yes	Yes	Yes
1422	KPNIH1_07720	KPNRH_03796	VK055_RS09130	ecl8_03511		No	No	No	No
1423	KPNIH1_07725	KPNRH_03795	VK055_RS09125	ecl8_03510		No	No	No	No
1424	KPNIH1_07730	KPNRH_03794	VK055_RS09115	ecl8_03509		No	No	No	No
1425	KPNIH1_07735	KPNRH_03793	VK055_RS09110	ecl8_03508		Yes	Yes	No	No
1426	KPNIH1_07740	KPNRH_03792	VK055_RS09105	ecl8_03507		No	No	No	No
1427	KPNIH1_07745	KPNRH_03791	VK055_RS09100	ecl8_03506		No	No	No	No
1428	KPNIH1_07750	KPNRH_03790	VK055_RS09095	ecl8_03505		No	No	No	No
1429	KPNIH1_07755	KPNRH_03789	VK055_RS09090	ecl8_03504		No	No	No	No
1430	KPNIH1_07760	KPNRH_03788	VK055_RS09085	ecl8_03503		No	No	No	No
1431	KPNIH1_07765	KPNRH_03787	VK055_RS09080	ecl8_03502		No	No	No	No
1432	KPNIH1_07770	KPNRH_03786	VK055_RS09075	ecl8_03501		No	No	No	No
1433	KPNIH1_07775	KPNRH_03785	VK055_RS09070	ecl8_03500		No	No	No	No
1434	KPNIH1_07780	KPNRH_03784	VK055_RS09065	ecl8_03499		No	No	No	No
1435	KPNIH1_07785	KPNRH_03783	VK055_RS09060	ecl8_03498		No	No	No	No
1436	KPNIH1_07790	KPNRH_03782	VK055_RS09055	ecl8_03497		No	No	No	No
1437	KPNIH1_07795	KPNRH_03781	VK055_RS09050	ecl8_03496		No	No	No	No
1438	KPNIH1_07800	KPNRH_03780	VK055_RS09045	ecl8_03495		No	No	No	No
1439	KPNIH1_07805	KPNRH_03779	VK055_RS09040	ecl8_03494		No	No	No	No
1440	KPNIH1_07810	KPNRH_03778	VK055_RS09035	ecl8_03493		No	No	No	No
1441	KPNIH1_07815	KPNRH_03777	VK055_RS09030	ecl8_03492		No	No	No	Yes
1442	KPNIH1_07820	KPNRH_03776	VK055_RS09025	ecl8_03491		No	No	No	No
1443	KPNIH1_07830	KPNRH_03775	VK055_RS09015	ecl8_03490		No	No	No	No
1444	KPNIH1_07835	KPNRH_03774	VK055_RS09010	ecl8_03489		No	No	No	No
1445	KPNIH1_07840	KPNRH_03773	VK055_RS09005	ecl8_03488		No	No	No	No
1446	KPNIH1_07845	KPNRH_03772	VK055_RS09000	ecl8_03487		No	No	No	No
1447	KPNIH1_07850	KPNRH_03771	VK055_RS08995	ecl8_03486		No	No	No	No
1448	KPNIH1_07855	KPNRH_03770	VK055_RS08990	ecl8_03485		No	No	No	No
1449	KPNIH1_07860	KPNRH_03769	VK055_RS08985	ecl8_03484		No	No	Yes	No
1450	KPNIH1_07865	KPNRH_03768	VK055_RS08980	ecl8_03483		No	No	No	No
1451	KPNIH1_07870	KPNRH_03767	VK055_RS08975	ecl8_03482		No	No	No	No
1452	KPNIH1_07880	KPNRH_03766	VK055_RS08965	ecl8_03481		No	No	No	No
1453	KPNIH1_07885	KPNRH_03765	VK055_RS08960	ecl8_03480		No	Yes	No	No
1454	KPNIH1_07895	KPNRH_03763	VK055_RS08950	ecl8_03478		Yes	No	No	No
1455	KPNIH1_07900	KPNRH_03762	VK055_RS08945	ecl8_03477		No	No	No	No
1456	KPNIH1_07905	KPNRH_03761	VK055_RS08940	ecl8_03476		No	No	No	No
1457	KPNIH1_07910	KPNRH_03760	VK055_RS08935	ecl8_03475		No	No	No	No
1458	KPNIH1_07950;KPNIH1_18640;KPNIH1_18645;KPNIH1_18650					No	No	No	No
1459	KPNIH1_07955;KPNIH1_07960;KPNIH1_07965;KPNIH1_18655;KPNIH1_26390;KPNIH1_26395;KPNIH1_26400	KPNRH_03748;KPNRH_03750				No	No	No	No
1460	KPNIH1_07970	KPNRH_03746	VK055_RS08870	ecl8_03463		No	No	No	No
1461	KPNIH1_07975	KPNRH_03745	VK055_RS08865	ecl8_03462		No	No	No	No
1462	KPNIH1_07980	KPNRH_03744;KPNRH_04619	VK055_RS08860;VK055_RS27025	ecl8_03461		No	No	No	No
1463	KPNIH1_07985	KPNRH_03743	VK055_RS08855	ecl8_03460		No	No	No	No
1464	KPNIH1_07990	KPNRH_03742	VK055_RS08850	ecl8_03459		No	No	No	No
1465	KPNIH1_07995	KPNRH_03741	VK055_RS08845	ecl8_03458		Yes	Yes	No	No
1466	KPNIH1_08000	KPNRH_03740	VK055_RS08840	ecl8_03457		No	No	No	No
1467	KPNIH1_08005	KPNRH_03739	VK055_RS08835	ecl8_03456		Yes	No	No	No
1468	KPNIH1_08010	KPNRH_03738	VK055_RS08830	ecl8_03455		No	No	No	No
1469	KPNIH1_08015	KPNRH_03737	VK055_RS08825	ecl8_03454		No	No	No	No
1470	KPNIH1_08020	KPNRH_03736	VK055_RS29420	ecl8_03453		No	No	No	No
1471	KPNIH1_08025	KPNRH_03735	VK055_RS08810	ecl8_03452		No	No	No	No
1472	KPNIH1_08030	KPNRH_03734	VK055_RS08805	ecl8_03451		No	No	No	No
1473	KPNIH1_08035	KPNRH_03733	VK055_RS08800	ecl8_03450		No	No	No	No
1474	KPNIH1_08040	KPNRH_03732	VK055_RS08795	ecl8_03448;ecl8_03449		No	No	No	No
1475	KPNIH1_08045	KPNRH_03731	VK055_RS08790	ecl8_03447		No	No	No	No
1476	KPNIH1_08050	KPNRH_03730	VK055_RS08785	ecl8_03446		No	No	No	No
1477	KPNIH1_08060	KPNRH_03729	VK055_RS08780	ecl8_03445		No	No	No	No
1478	KPNIH1_08065	KPNRH_03728	VK055_RS08775	ecl8_03444		No	No	No	No
1479	KPNIH1_08070	KPNRH_03727	VK055_RS29415	ecl8_03443		No	No	No	No
1480	KPNIH1_08075	KPNRH_03726	VK055_RS08765	ecl8_03442		No	No	No	No
1481	KPNIH1_08080	KPNRH_03725	VK055_RS08760	ecl8_03441		No	No	No	No
1482	KPNIH1_08085	KPNRH_03724	VK055_RS08755	ecl8_03440		No	No	No	No
1483	KPNIH1_08090	KPNRH_03723	VK055_RS08750	ecl8_03439		No	No	No	No
1484	KPNIH1_08095	KPNRH_03722	VK055_RS08745	ecl8_03438		No	No	No	No
1485	KPNIH1_08100	KPNRH_03721	VK055_RS08735	ecl8_03437		No	No	No	No
1486	KPNIH1_08105	KPNRH_03720	VK055_RS08730	ecl8_03436		No	No	No	No
1487	KPNIH1_08110	KPNRH_03719	VK055_RS08710	ecl8_03431		No	No	No	No
1488	KPNIH1_08115	KPNRH_03718	VK055_RS08705	ecl8_03430		No	No	No	No
1489	KPNIH1_08120	KPNRH_03717	VK055_RS08700	ecl8_03429		No	No	No	No
1490	KPNIH1_08125	KPNRH_03716	VK055_RS08695	ecl8_03428		No	No	No	No
1491	KPNIH1_08130	KPNRH_03715	VK055_RS08690	ecl8_03427		No	No	No	No
1492	KPNIH1_08135	KPNRH_03714	VK055_RS29580	ecl8_03426		No	No	No	No
1493	KPNIH1_08140	KPNRH_03713	VK055_RS08680	ecl8_03425		No	No	No	No
1494	KPNIH1_08145	KPNRH_03712	VK055_RS08675	ecl8_03424		No	No	No	No
1495	KPNIH1_08150	KPNRH_03711	VK055_RS08670	ecl8_03423		No	No	No	No
1496	KPNIH1_08155	KPNRH_03710	VK055_RS08665	ecl8_03422		No	No	No	No
1497	KPNIH1_08160	KPNRH_03709	VK055_RS08660	ecl8_03421		No	No	No	No
1498	KPNIH1_08165	KPNRH_03708	VK055_RS08655	ecl8_03420		No	No	No	No
1499	KPNIH1_08170	KPNRH_03707	VK055_RS08650	ecl8_03419		No	No	No	No
1500	KPNIH1_08175	KPNRH_03706	VK055_RS08645	ecl8_03418		No	No	No	No
1501	KPNIH1_08180	KPNRH_03705	VK055_RS08640	ecl8_03417		No	No	No	No
1502	KPNIH1_08185		VK055_RS08635			No	No	No	No
1503	KPNIH1_08190	KPNRH_03704	VK055_RS08630	ecl8_03416		No	No	No	No
1504	KPNIH1_08200	KPNRH_03702	VK055_RS08625	ecl8_03414		No	No	No	No
1505	KPNIH1_08205	KPNRH_03701	VK055_RS08620	ecl8_03413		No	No	No	No
1506	KPNIH1_08210	KPNRH_03700	VK055_RS08615	ecl8_03412		No	No	No	No
1507	KPNIH1_08215	KPNRH_03699	VK055_RS08610	ecl8_03411		No	No	No	No
1508	KPNIH1_08225	KPNRH_03696	VK055_RS08600	ecl8_03409		No	No	No	No
1509	KPNIH1_08230	KPNRH_03695	VK055_RS08595	ecl8_03408		Yes	No	No	No
1510	KPNIH1_08270	KPNRH_03687	VK055_RS08555	ecl8_03400		No	No	No	No
1511	KPNIH1_08275	KPNRH_03686	VK055_RS08550;VK055_RS28310	ecl8_03399		No	No	No	No
1512	KPNIH1_08280	KPNRH_03685	VK055_RS08545	ecl8_03398		No	No	No	No
1513	KPNIH1_08285	KPNRH_03684	VK055_RS08540	ecl8_03397		No	No	No	No
1514	KPNIH1_08290	KPNRH_03683	VK055_RS08535	ecl8_03396		No	No	No	No
1515	KPNIH1_08295	KPNRH_03682	VK055_RS08530	ecl8_03395		No	No	No	No
1516	KPNIH1_08300	KPNRH_03681	VK055_RS08520	ecl8_03394		No	No	No	No
1517	KPNIH1_08305	KPNRH_03680	VK055_RS08515	ecl8_03393		No	No	No	No
1518	KPNIH1_08310	KPNRH_03679	VK055_RS08510	ecl8_03392		No	No	No	No
1519	KPNIH1_08315	KPNRH_03678	VK055_RS08505	ecl8_03391		No	No	No	No
1520	KPNIH1_08320	KPNRH_03677	VK055_RS08500	ecl8_03390		No	No	No	No
1521	KPNIH1_08325	KPNRH_03676	VK055_RS08495	ecl8_03389		No	No	No	No
1522	KPNIH1_08330	KPNRH_03675	VK055_RS08490	ecl8_03388		No	No	No	No
1523	KPNIH1_08335	KPNRH_03674	VK055_RS08485	ecl8_03387		No	No	No	No
1524	KPNIH1_08345	KPNRH_03673	VK055_RS08480	ecl8_03386		No	No	No	No
1525	KPNIH1_08350	KPNRH_03672	VK055_RS08475	ecl8_03385		No	No	No	No
1526	KPNIH1_08355	KPNRH_03671	VK055_RS08470	ecl8_03384		No	No	No	No
1527	KPNIH1_08360	KPNRH_03670	VK055_RS08465	ecl8_03383		No	No	No	No
1528	KPNIH1_08365	KPNRH_03669	VK055_RS08460	ecl8_03382		No	No	No	No
1529	KPNIH1_08370	KPNRH_03668	VK055_RS08455	ecl8_03381		No	No	No	No
1530	KPNIH1_08375	KPNRH_03667	VK055_RS08450	ecl8_03380		No	No	No	No
1531	KPNIH1_08380	KPNRH_03666	VK055_RS08445	ecl8_03379		No	No	No	No
1532	KPNIH1_08385	KPNRH_03665	VK055_RS08440	ecl8_03378		No	No	No	No
1533	KPNIH1_08390	KPNRH_03664	VK055_RS08435	ecl8_03377		No	No	No	No
1534	KPNIH1_08395	KPNRH_03663	VK055_RS08425	ecl8_03376		No	No	No	No
1535	KPNIH1_08405	KPNRH_03662	VK055_RS08420	ecl8_03375		No	No	No	No
1536	KPNIH1_08415	KPNRH_03660	VK055_RS08410	ecl8_03373		No	No	No	No
1537	KPNIH1_08420	KPNRH_03659	VK055_RS08405	ecl8_03372		No	No	No	No
1538	KPNIH1_08425	KPNRH_03658	VK055_RS08400	ecl8_03371		No	No	No	No
1539	KPNIH1_08430	KPNRH_03657	VK055_RS08395	ecl8_03370		No	No	No	No
1540	KPNIH1_08435	KPNRH_03656	VK055_RS08390	ecl8_03369		No	No	No	No
1541	KPNIH1_08440	KPNRH_03655	VK055_RS08385	ecl8_03368		No	No	No	No
1542	KPNIH1_08445	KPNRH_03654	VK055_RS08380	ecl8_03367		No	No	No	No
1543	KPNIH1_08455	KPNRH_03653	VK055_RS08375	ecl8_03365		No	No	No	No
1544	KPNIH1_08460	KPNRH_03652	VK055_RS08370;VK055_RS28310	ecl8_03364		No	No	No	No
1545	KPNIH1_08465	KPNRH_03651	VK055_RS08365	ecl8_03363		No	No	No	No
1546	KPNIH1_08470	KPNRH_03650	VK055_RS08360	ecl8_03362		No	No	No	No
1547	KPNIH1_08475	KPNRH_03649	VK055_RS08355	ecl8_03361		No	No	No	No
1548	KPNIH1_08480	KPNRH_03648	VK055_RS08350	ecl8_03360		No	No	No	No
1549	KPNIH1_08485	KPNRH_03647	VK055_RS08345	ecl8_03359		No	No	No	No
1550	KPNIH1_08490	KPNRH_03646	VK055_RS08340	ecl8_03358		No	No	No	No
1551	KPNIH1_08495	KPNRH_03645	VK055_RS08335	ecl8_03357		No	No	No	No
1552	KPNIH1_08500	KPNRH_03644	VK055_RS08330	ecl8_03356		No	No	No	No
1553	KPNIH1_08505	KPNRH_03643	VK055_RS08325	ecl8_03355		No	No	No	No
1554	KPNIH1_08510	KPNRH_03642	VK055_RS08320	ecl8_03354		No	No	No	No
1555	KPNIH1_08515	KPNRH_03641	VK055_RS08315	ecl8_03353		No	No	No	No
1556	KPNIH1_08520	KPNRH_03640	VK055_RS08310	ecl8_03352		No	No	No	No
1557	KPNIH1_08525	KPNRH_03638	VK055_RS08305	ecl8_03350		No	No	No	No
1558	KPNIH1_08530	KPNRH_03637	VK055_RS08300	ecl8_03349		No	No	No	No
1559	KPNIH1_08535	KPNRH_03636	VK055_RS08295	ecl8_03348		Yes	No	No	No
1560	KPNIH1_08540	KPNRH_03635	VK055_RS08290	ecl8_03347		No	No	No	No
1561	KPNIH1_08545	KPNRH_03634	VK055_RS08285	ecl8_03346		No	No	No	No
1562	KPNIH1_08555	KPNRH_03633	VK055_RS08275	ecl8_03345		No	No	No	No
1563	KPNIH1_08560	KPNRH_03632	VK055_RS08270	ecl8_03344		No	No	No	No
1564	KPNIH1_08565	KPNRH_03631	VK055_RS08265	ecl8_03343		No	No	No	No
1565	KPNIH1_08570	KPNRH_03630	VK055_RS08260	ecl8_03342		No	No	No	No
1566	KPNIH1_08575	KPNRH_03629	VK055_RS08255	ecl8_03341		No	No	No	No
1567	KPNIH1_08580	KPNRH_03628	VK055_RS08250	ecl8_03340		No	No	No	No
1568	KPNIH1_08585	KPNRH_03627	VK055_RS08245	ecl8_03339		No	No	No	No
1569	KPNIH1_08590	KPNRH_03626				No	No	No	No
1570	KPNIH1_08600	KPNRH_03623				No	No	No	No
1571	KPNIH1_08605	KPNRH_03622				Yes	Yes	No	No
1572	KPNIH1_08615	KPNRH_03620				No	No	No	No
1573	KPNIH1_08620	KPNRH_03619				No	No	No	No
1574	KPNIH1_08625	KPNRH_03618				No	No	No	No
1575	KPNIH1_08630	KPNRH_03617				No	No	No	No
1576	KPNIH1_08635	KPNRH_03616				No	No	No	No
1577	KPNIH1_08640	KPNRH_03615				No	No	No	No
1578	KPNIH1_08645	KPNRH_03614				No	No	No	No
1579	KPNIH1_08650	KPNRH_03613				No	No	No	No
1580	KPNIH1_08655	KPNRH_03612				No	No	No	No
1581	KPNIH1_08660	KPNRH_03611				No	No	No	No
1582	KPNIH1_08675	KPNRH_03609				No	No	No	No
1583	KPNIH1_08680	KPNRH_03608				No	No	No	No
1584	KPNIH1_08685	KPNRH_03607				No	No	No	No
1585	KPNIH1_08690	KPNRH_03606				No	No	No	No
1586	KPNIH1_08695	KPNRH_03605				No	No	No	No
1587	KPNIH1_08700	KPNRH_03604				Yes	No	No	No
1588	KPNIH1_08705;KPNIH1_19980	KPNRH_03603		ecl8_03316		Yes	No	No	No
1589	KPNIH1_08710	KPNRH_03602		ecl8_03315		Yes	No	No	No
1590	KPNIH1_08715	KPNRH_03601		ecl8_03314		No	No	No	No
1591	KPNIH1_08720	KPNRH_03600				No	No	No	No
1592	KPNIH1_08725;KPNIH1_19960	KPNRH_03599		ecl8_03313		No	No	No	No
1593	KPNIH1_08730	KPNRH_03598		ecl8_03312		No	No	No	No
1594	KPNIH1_08735	KPNRH_03597		ecl8_03311		No	No	No	No
1595	KPNIH1_08740	KPNRH_03596				Yes	No	No	No
1596	KPNIH1_08745;KPNIH1_19940	KPNRH_03595		ecl8_03309		No	No	No	No
1597	KPNIH1_08750;KPNIH1_19935	KPNRH_03594		ecl8_03308		No	No	No	No
1598	KPNIH1_08755	KPNRH_03593		ecl8_03307		No	No	No	No
1599	KPNIH1_08760	KPNRH_03592				No	No	No	No
1600	KPNIH1_08775	KPNRH_03590				No	No	No	No
1601	KPNIH1_08780	KPNRH_03589				No	No	No	No
1602	KPNIH1_08785	KPNRH_03588				No	No	No	No
1603	KPNIH1_08790;KPNIH1_19905	KPNRH_03587		ecl8_03301		No	No	No	No
1604	KPNIH1_08795;KPNIH1_19900	KPNRH_03586		ecl8_03300		No	No	No	No
1605	KPNIH1_08800;KPNIH1_19895	KPNRH_03585		ecl8_03299		No	No	No	No
1606	KPNIH1_08805	KPNRH_03584				No	No	No	No
1607	KPNIH1_08810	KPNRH_03583				No	No	No	No
1608	KPNIH1_08815	KPNRH_03582				No	No	No	No
1609	KPNIH1_08820	KPNRH_03579	VK055_RS08050	ecl8_03295		No	No	No	No
1610	KPNIH1_08825	KPNRH_03578	VK055_RS08045	ecl8_03294		No	No	No	No
1611	KPNIH1_08830	KPNRH_03577	VK055_RS08040	ecl8_03293		Yes	No	No	No
1612	KPNIH1_08835	KPNRH_03576	VK055_RS08035	ecl8_03292		No	No	No	No
1613	KPNIH1_08840	KPNRH_03574;KPNRH_03575	VK055_RS08030	ecl8_03291		No	No	No	No
1614	KPNIH1_08845	KPNRH_03573	VK055_RS08025	ecl8_03290		No	No	No	No
1615	KPNIH1_08850	KPNRH_03572	VK055_RS08020	ecl8_03289		No	No	No	No
1616	KPNIH1_08855	KPNRH_03571	VK055_RS08015	ecl8_03288		No	No	No	No
1617	KPNIH1_08860	KPNRH_03570	VK055_RS08010	ecl8_03287		No	No	No	No
1618	KPNIH1_08865	KPNRH_03569	VK055_RS08005	ecl8_03286		No	No	No	No
1619	KPNIH1_08870	KPNRH_03568	VK055_RS08000	ecl8_03285		No	No	No	No
1620	KPNIH1_08875	KPNRH_03567	VK055_RS07995	ecl8_03284		No	No	No	No
1621	KPNIH1_08880	KPNRH_03566	VK055_RS07990	ecl8_03283		No	No	No	No
1622	KPNIH1_08885	KPNRH_03565	VK055_RS07985	ecl8_03282		No	No	No	No
1623	KPNIH1_08890	KPNRH_03564	VK055_RS07980	ecl8_03281		No	No	No	No
1624	KPNIH1_08895	KPNRH_03563	VK055_RS07975	ecl8_03280		No	No	No	No
1625	KPNIH1_08900	KPNRH_03562	VK055_RS07970	ecl8_03279		No	No	No	No
1626	KPNIH1_08905	KPNRH_03561	VK055_RS07965	ecl8_03278		No	No	No	No
1627	KPNIH1_08910	KPNRH_03560	VK055_RS07960	ecl8_03277		No	No	No	No
1628	KPNIH1_08915	KPNRH_03559	VK055_RS07955	ecl8_03276		No	No	No	No
1629	KPNIH1_08920	KPNRH_03558	VK055_RS07950	ecl8_03275		No	No	No	No
1630	KPNIH1_08930	KPNRH_03556	VK055_RS07945	ecl8_03273		No	No	No	No
1631	KPNIH1_08935	KPNRH_03555	VK055_RS07940	ecl8_03272		No	No	No	No
1632	KPNIH1_08940	KPNRH_03554	VK055_RS07935	ecl8_03271		No	No	No	No
1633	KPNIH1_08945	KPNRH_03553	VK055_RS07930	ecl8_03270		No	No	No	No
1634	KPNIH1_08950	KPNRH_03552	VK055_RS07925	ecl8_03269		No	No	No	No
1635	KPNIH1_08955	KPNRH_03551	VK055_RS07920	ecl8_03268		No	No	No	No
1636	KPNIH1_08960	KPNRH_03550	VK055_RS07915	ecl8_03267		No	No	No	No
1637	KPNIH1_08965	KPNRH_03549	VK055_RS07910	ecl8_03266		No	No	No	No
1638	KPNIH1_08970	KPNRH_03548	VK055_RS07905	ecl8_03265		No	No	No	No
1639	KPNIH1_08975	KPNRH_03547	VK055_RS07900	ecl8_03264		No	No	No	No
1640	KPNIH1_08980	KPNRH_03546	VK055_RS07895	ecl8_03263		No	No	No	No
1641	KPNIH1_08985	KPNRH_03545	VK055_RS07890	ecl8_03262		No	No	No	No
1642	KPNIH1_08990	KPNRH_03544	VK055_RS07885	ecl8_03261		No	No	No	No
1643	KPNIH1_08995	KPNRH_03543	VK055_RS07880	ecl8_03260		No	No	No	No
1644	KPNIH1_09000	KPNRH_03542	VK055_RS07875	ecl8_03259		Yes	No	No	No
1645	KPNIH1_09005	KPNRH_03541	VK055_RS07870	ecl8_03258		Yes	No	No	No
1646	KPNIH1_09010	KPNRH_03540	VK055_RS07865	ecl8_03257		No	No	No	No
1647	KPNIH1_09015	KPNRH_03539	VK055_RS07860	ecl8_03256		Yes	Yes	Yes	Yes
1648	KPNIH1_09020	KPNRH_03538	VK055_RS07855	ecl8_03255		No	No	No	No
1649	KPNIH1_09025	KPNRH_03537	VK055_RS07850	ecl8_03254		No	Yes	Yes	No
1650	KPNIH1_09030	KPNRH_03536	VK055_RS07845	ecl8_03253		No	Yes	Yes	No
1651	KPNIH1_09035	KPNRH_03535	VK055_RS07840	ecl8_03252		No	No	No	No
1652	KPNIH1_09040	KPNRH_03534	VK055_RS07830	ecl8_03251		No	No	No	No
1653	KPNIH1_09045	KPNRH_03533	VK055_RS07825	ecl8_03250		No	Yes	Yes	Yes
1654	KPNIH1_09050	KPNRH_03532	VK055_RS07820	ecl8_03249		Yes	Yes	Yes	Yes
1655	KPNIH1_09055	KPNRH_03531	VK055_RS07815	ecl8_03248		No	No	No	No
1656	KPNIH1_09060	KPNRH_03530	VK055_RS07810	ecl8_03247		Yes	Yes	Yes	Yes
1657	KPNIH1_09065	KPNRH_03528	VK055_RS07805	ecl8_03246		No	No	No	Yes
1658	KPNIH1_09070;KPNIH1_12430	KPNRH_02776;KPNRH_03527	VK055_RS04650;VK055_RS07800	ecl8_02647;ecl8_03245		No	No	No	No
1659	KPNIH1_09075	KPNRH_03526	VK055_RS07795	ecl8_03244		No	No	No	No
1660	KPNIH1_09080	KPNRH_03525	VK055_RS07785	ecl8_03243		No	No	No	No
1661	KPNIH1_09085	KPNRH_03524	VK055_RS07780	ecl8_03242		Yes	No	No	No
1662	KPNIH1_09090	KPNRH_03523	VK055_RS07775	ecl8_03241		No	No	No	No
1663	KPNIH1_09095	KPNRH_03522	VK055_RS07770	ecl8_03240		No	No	No	No
1664	KPNIH1_09100	KPNRH_03521	VK055_RS07765	ecl8_03239		No	No	No	No
1665	KPNIH1_09105	KPNRH_03520	VK055_RS07760	ecl8_03238		No	No	No	No
1666	KPNIH1_09110	KPNRH_03519	VK055_RS07755	ecl8_03237		No	No	No	No
1667	KPNIH1_09115	KPNRH_03518	VK055_RS07750	ecl8_03236		No	No	No	No
1668	KPNIH1_09120	KPNRH_03517	VK055_RS07745	ecl8_03235		No	Yes	Yes	Yes
1669	KPNIH1_09125	KPNRH_03516	VK055_RS07740	ecl8_03234		Yes	Yes	Yes	Yes
1670	KPNIH1_09130	KPNRH_03515	VK055_RS07735	ecl8_03233		Yes	No	No	No
1671	KPNIH1_09135	KPNRH_03514	VK055_RS07730	ecl8_03232		No	No	No	No
1672	KPNIH1_09140	KPNRH_03513	VK055_RS07725	ecl8_03231		Yes	Yes	Yes	Yes
1673	KPNIH1_09145	KPNRH_03512	VK055_RS07720	ecl8_03230		Yes	Yes	Yes	Yes
1674	KPNIH1_09150	KPNRH_03511	VK055_RS07715	ecl8_03229		No	No	No	No
1675	KPNIH1_09155	KPNRH_03510	VK055_RS07710	ecl8_03228		No	No	Yes	Yes
1676	KPNIH1_09160	KPNRH_03509	VK055_RS07705	ecl8_03227		Yes	Yes	Yes	Yes
1677	KPNIH1_09165	KPNRH_03508	VK055_RS07700	ecl8_03226		No	No	No	No
1678	KPNIH1_09170	KPNRH_03507	VK055_RS07695	ecl8_03225		No	No	No	No
1679	KPNIH1_09175	KPNRH_03506	VK055_RS07690	ecl8_03224		No	No	No	No
1680	KPNIH1_09180	KPNRH_03505	VK055_RS07685	ecl8_03223		Yes	Yes	Yes	Yes
1681	KPNIH1_09185	KPNRH_03504	VK055_RS07680	ecl8_03222		Yes	Yes	Yes	Yes
1682	KPNIH1_09190	KPNRH_03503	VK055_RS07675	ecl8_03221		Yes	Yes	Yes	Yes
1683	KPNIH1_09195	KPNRH_03502	VK055_RS07670	ecl8_03220		No	No	No	No
1684	KPNIH1_09200	KPNRH_03500	VK055_RS07665	ecl8_03218		No	No	No	No
1685	KPNIH1_09205	KPNRH_03499	VK055_RS07660	ecl8_03217		No	No	No	No
1686	KPNIH1_09210	KPNRH_03498	VK055_RS07655	ecl8_03216		No	No	No	No
1687	KPNIH1_09215	KPNRH_03497	VK055_RS07650	ecl8_03215		No	No	No	No
1688	KPNIH1_09220	KPNRH_03496	VK055_RS07645	ecl8_03214		Yes	Yes	Yes	Yes
1689	KPNIH1_09225	KPNRH_03495	VK055_RS07640	ecl8_03213		No	No	No	No
1690	KPNIH1_09230	KPNRH_03494	VK055_RS07635	ecl8_03212		No	No	No	No
1691	KPNIH1_09235	KPNRH_03493	VK055_RS07630	ecl8_03211		No	No	No	No
1692	KPNIH1_09240	KPNRH_03492	VK055_RS07625	ecl8_03210		No	No	No	No
1693	KPNIH1_09245	KPNRH_03491	VK055_RS07620	ecl8_03209		No	No	No	No
1694	KPNIH1_09250	KPNRH_03490	VK055_RS07615	ecl8_03208		No	No	No	No
1695	KPNIH1_09255	KPNRH_03489	VK055_RS07605	ecl8_03207		No	No	No	No
1696	KPNIH1_09260	KPNRH_03488	VK055_RS07600	ecl8_03206		No	No	No	No
1697	KPNIH1_09265	KPNRH_03487	VK055_RS07595	ecl8_03205		No	No	No	No
1698	KPNIH1_09275	KPNRH_03485	VK055_RS07585	ecl8_03203		No	No	No	No
1699	KPNIH1_09280	KPNRH_03484	VK055_RS07580	ecl8_03202		Yes	No	No	No
1700	KPNIH1_09285	KPNRH_03482	VK055_RS07575	ecl8_03201		No	No	No	No
1701	KPNIH1_09290	KPNRH_03481	VK055_RS07570	ecl8_03200		No	No	No	No
1702	KPNIH1_09295	KPNRH_03480	VK055_RS07565	ecl8_03199		No	No	No	No
1703	KPNIH1_09300	KPNRH_03479	VK055_RS07560	ecl8_03198		No	No	No	No
1704	KPNIH1_09305	KPNRH_03478	VK055_RS07555	ecl8_03197		No	No	No	No
1705	KPNIH1_09310	KPNRH_03477	VK055_RS07550	ecl8_03196		No	No	No	No
1706	KPNIH1_09315	KPNRH_03476	VK055_RS07545	ecl8_03195		No	No	No	No
1707	KPNIH1_09320	KPNRH_03475	VK055_RS07540	ecl8_03194		No	No	No	No
1708	KPNIH1_09325		VK055_RS07535			Yes	No	No	No
1709	KPNIH1_09330	KPNRH_03474	VK055_RS07530	ecl8_03193		Yes	Yes	Yes	Yes
1710	KPNIH1_09335	KPNRH_03473	VK055_RS07525	ecl8_03192		No	No	No	No
1711	KPNIH1_09340	KPNRH_03472	VK055_RS07520	ecl8_03191		No	No	No	No
1712	KPNIH1_09345	KPNRH_03471	VK055_RS07515	ecl8_03190		No	No	No	No
1713	KPNIH1_09350	KPNRH_03470	VK055_RS07510	ecl8_03189		No	No	No	No
1714	KPNIH1_09355	KPNRH_03469	VK055_RS07505	ecl8_03188		No	No	No	No
1715	KPNIH1_09360	KPNRH_03468	VK055_RS07500	ecl8_03187		No	No	No	No
1716	KPNIH1_09365	KPNRH_03467	VK055_RS07495	ecl8_03186		No	No	No	No
1717	KPNIH1_09370	KPNRH_03466	VK055_RS07490	ecl8_03185		No	No	No	No
1718	KPNIH1_09375	KPNRH_03465	VK055_RS07485	ecl8_03184		Yes	No	No	No
1719	KPNIH1_09380	KPNRH_03464	VK055_RS07480	ecl8_03183		No	No	No	No
1720	KPNIH1_09385	KPNRH_03463	VK055_RS07475	ecl8_03182		No	No	No	No
1721	KPNIH1_09390	KPNRH_03462	VK055_RS07470	ecl8_03181		No	No	No	No
1722	KPNIH1_09395	KPNRH_03461	VK055_RS07465	ecl8_03180		No	No	No	No
1723	KPNIH1_09400	KPNRH_03460	VK055_RS07460	ecl8_03179		No	No	No	No
1724	KPNIH1_09405	KPNRH_03459	VK055_RS07455	ecl8_03171		No	No	No	No
1725	KPNIH1_09410	KPNRH_03458	VK055_RS07450	ecl8_03170		Yes	Yes	Yes	Yes
1726	KPNIH1_09415	KPNRH_03457	VK055_RS07445	ecl8_03169		No	No	No	No
1727	KPNIH1_09420	KPNRH_03456	VK055_RS07440	ecl8_03168		No	No	No	No
1728	KPNIH1_09425					No	No	No	No
1729	KPNIH1_09430	KPNRH_03454	VK055_RS29565	ecl8_03166		No	No	No	No
1730	KPNIH1_09435;KPNIH1_09440	KPNRH_03453;KPNRH_03452	VK055_RS29560	ecl8_03165;ecl8_03164		No	No	No	No
1731	KPNIH1_09445	KPNRH_03451	VK055_RS07355	ecl8_03163		No	No	No	No
1732	KPNIH1_09450	KPNRH_03450	VK055_RS07350	ecl8_03162		No	No	No	No
1733	KPNIH1_09455	KPNRH_03449	VK055_RS07345	ecl8_03161		No	No	No	No
1734	KPNIH1_09460	KPNRH_03448	VK055_RS07340	ecl8_03160		No	No	No	No
1735	KPNIH1_09465	KPNRH_03447	VK055_RS07335	ecl8_03159		No	No	No	No
1736	KPNIH1_09470	KPNRH_03446	VK055_RS07330	ecl8_03158		No	No	No	No
1737	KPNIH1_09475	KPNRH_03445	VK055_RS07325	ecl8_03157		No	No	No	No
1738	KPNIH1_09480	KPNRH_03444	VK055_RS07320	ecl8_03156		No	No	No	No
1739	KPNIH1_09485	KPNRH_03443	VK055_RS07315	ecl8_03155		No	No	No	No
1740	KPNIH1_09490	KPNRH_03442	VK055_RS07310	ecl8_03154		No	No	No	No
1741	KPNIH1_09495	KPNRH_03441	VK055_RS07305	ecl8_03153		No	No	No	No
1742	KPNIH1_09500	KPNRH_03440	VK055_RS07300	ecl8_03152		No	No	No	No
1743	KPNIH1_09510	KPNRH_03438	VK055_RS07290	ecl8_03150		No	No	No	No
1744	KPNIH1_09515	KPNRH_03437	VK055_RS07285	ecl8_03149		No	No	No	No
1745	KPNIH1_09520	KPNRH_03436	VK055_RS07280	ecl8_03148		No	No	No	No
1746	KPNIH1_09525	KPNRH_03435	VK055_RS07275	ecl8_03147		No	No	No	No
1747	KPNIH1_09530	KPNRH_03434	VK055_RS07270	ecl8_03146		Yes	No	No	No
1748	KPNIH1_09535	KPNRH_03433	VK055_RS07265	ecl8_03145		No	No	No	No
1749	KPNIH1_09545		VK055_RS07255			Yes	No	No	No
1750	KPNIH1_09550	KPNRH_03432	VK055_RS07250	ecl8_03144		No	No	No	No
1751	KPNIH1_09555	KPNRH_03431	VK055_RS07245	ecl8_03142		No	No	No	No
1752	KPNIH1_09560	KPNRH_03430	VK055_RS07240	ecl8_03141		No	No	No	No
1753	KPNIH1_09565	KPNRH_03429	VK055_RS07235	ecl8_03140		No	No	No	No
1754	KPNIH1_09570	KPNRH_03428	VK055_RS07230	ecl8_03139		No	No	No	No
1755	KPNIH1_09575	KPNRH_03427	VK055_RS07225	ecl8_03138		No	No	No	No
1756	KPNIH1_09580	KPNRH_03426	VK055_RS07220	ecl8_03137		Yes	No	No	No
1757	KPNIH1_09585	KPNRH_03425	VK055_RS07215	ecl8_03136		No	No	No	No
1758	KPNIH1_09590	KPNRH_03424	VK055_RS07210	ecl8_03135		No	No	No	No
1759	KPNIH1_09595	KPNRH_03423	VK055_RS07205	ecl8_03134		No	No	No	No
1760	KPNIH1_09600	KPNRH_03422	VK055_RS07200	ecl8_03133		No	No	No	No
1761	KPNIH1_09605	KPNRH_03421	VK055_RS07195	ecl8_03132		No	No	No	No
1762	KPNIH1_09610	KPNRH_03420	VK055_RS07190	ecl8_03131		No	No	No	No
1763	KPNIH1_09615	KPNRH_03419	VK055_RS07185	ecl8_03130		No	No	No	No
1764	KPNIH1_09620	KPNRH_03418	VK055_RS07180	ecl8_03129		No	No	No	No
1765	KPNIH1_09625	KPNRH_03417	VK055_RS07175	ecl8_03128		No	No	No	No
1766	KPNIH1_09630	KPNRH_03416	VK055_RS07170	ecl8_03127		No	No	No	No
1767	KPNIH1_09635	KPNRH_03415	VK055_RS07165	ecl8_03126		No	No	No	No
1768	KPNIH1_09640	KPNRH_03414	VK055_RS07160	ecl8_03125		No	No	No	No
1769	KPNIH1_09645;KPNIH1_09665					No	No	No	No
1770	KPNIH1_09650	KPNRH_03412	VK055_RS07110	ecl8_03123		No	No	No	No
1771	KPNIH1_09655	KPNRH_03411	VK055_RS07105	ecl8_03122		No	No	No	No
1772	KPNIH1_09660	KPNRH_03410	VK055_RS07100	ecl8_03121		No	No	No	No
1773	KPNIH1_09670	KPNRH_03408	VK055_RS07090	ecl8_03117		No	No	No	No
1774	KPNIH1_09675	KPNRH_03407	VK055_RS07085	ecl8_03116		No	No	No	No
1775	KPNIH1_09680	KPNRH_03406	VK055_RS07080	ecl8_03115		No	No	No	No
1776	KPNIH1_09685	KPNRH_03405	VK055_RS07075	ecl8_03114		No	No	No	No
1777	KPNIH1_09690	KPNRH_03404	VK055_RS07070	ecl8_03113		No	No	No	No
1778	KPNIH1_09695	KPNRH_03403	VK055_RS07065	ecl8_03112		No	No	No	No
1779	KPNIH1_09700	KPNRH_03402	VK055_RS07060	ecl8_03111		No	No	No	No
1780	KPNIH1_09705	KPNRH_03401	VK055_RS07055	ecl8_03110		No	No	No	No
1781	KPNIH1_09710	KPNRH_03400	VK055_RS07050	ecl8_03109		No	No	No	No
1782	KPNIH1_09715	KPNRH_03399	VK055_RS07045	ecl8_03108		No	No	No	No
1783	KPNIH1_09720	KPNRH_03398	VK055_RS07040	ecl8_03107		No	No	No	No
1784	KPNIH1_09725	KPNRH_03397	VK055_RS07035	ecl8_03106		No	No	No	No
1785	KPNIH1_09730	KPNRH_03396	VK055_RS07030	ecl8_03105		No	No	No	No
1786	KPNIH1_09735	KPNRH_03395	VK055_RS07020	ecl8_03104		No	No	No	No
1787	KPNIH1_09745	KPNRH_03393	VK055_RS07010	ecl8_03102		No	No	No	No
1788	KPNIH1_09755	KPNRH_03391	VK055_RS07000	ecl8_03100		Yes	No	No	No
1789	KPNIH1_09760	KPNRH_03390	VK055_RS06995	ecl8_03099		No	No	No	No
1790	KPNIH1_09765	KPNRH_03389	VK055_RS06990	ecl8_03098		No	No	No	No
1791	KPNIH1_09770	KPNRH_03388	VK055_RS06985	ecl8_03097		No	No	No	No
1792	KPNIH1_09775	KPNRH_03387	VK055_RS06980	ecl8_03096		Yes	No	No	No
1793	KPNIH1_09780	KPNRH_03386	VK055_RS06975	ecl8_03095		No	No	No	No
1794	KPNIH1_09785	KPNRH_03385	VK055_RS06970	ecl8_03094		No	No	No	No
1795	KPNIH1_09790	KPNRH_03384	VK055_RS06965	ecl8_03093		Yes	Yes	Yes	Yes
1796	KPNIH1_09795	KPNRH_03383	VK055_RS06960	ecl8_03092		No	No	No	No
1797	KPNIH1_09800	KPNRH_03382	VK055_RS06955	ecl8_03091		No	No	No	No
1798	KPNIH1_09805	KPNRH_03381	VK055_RS06950	ecl8_03090		No	No	Yes	Yes
1799	KPNIH1_09810	KPNRH_03379	VK055_RS06945	ecl8_03089		No	No	No	No
1800	KPNIH1_09815	KPNRH_03378	VK055_RS06940	ecl8_03088		No	No	No	No
1801	KPNIH1_09820	KPNRH_03376	VK055_RS06935	ecl8_03087		No	No	No	No
1802	KPNIH1_09825	KPNRH_03375	VK055_RS06930	ecl8_03086		Yes	No	No	No
1803	KPNIH1_09830	KPNRH_03374	VK055_RS06925	ecl8_03085		No	No	No	No
1804	KPNIH1_09835	KPNRH_03373	VK055_RS06920	ecl8_03084		Yes	Yes	Yes	Yes
1805	KPNIH1_09840	KPNRH_03372	VK055_RS06915	ecl8_03083		Yes	Yes	Yes	Yes
1806	KPNIH1_09845	KPNRH_03371	VK055_RS06910	ecl8_03082		Yes	Yes	Yes	Yes
1807	KPNIH1_09850	KPNRH_03370	VK055_RS06905	ecl8_03081		Yes	Yes	Yes	Yes
1808	KPNIH1_09855	KPNRH_03369	VK055_RS06900	ecl8_03080		No	No	No	No
1809	KPNIH1_09860	KPNRH_03368	VK055_RS06895	ecl8_03079		No	No	No	No
1810	KPNIH1_09865	KPNRH_03367	VK055_RS06890	ecl8_03078		No	No	No	Yes
1811	KPNIH1_09870	KPNRH_03366	VK055_RS06885	ecl8_03077		Yes	Yes	Yes	Yes
1812	KPNIH1_09875	KPNRH_03365	VK055_RS06880	ecl8_03076		Yes	Yes	Yes	Yes
1813	KPNIH1_09880	KPNRH_03364	VK055_RS06875	ecl8_03075		No	No	No	No
1814	KPNIH1_09885	KPNRH_03363	VK055_RS06870	ecl8_03074		No	No	No	No
1815	KPNIH1_09890	KPNRH_03362	VK055_RS06865	ecl8_03073		Yes	No	No	No
1816	KPNIH1_09895	KPNRH_03361	VK055_RS06860	ecl8_03072		No	No	No	No
1817	KPNIH1_09900	KPNRH_03360	VK055_RS06855	ecl8_03071		No	No	No	No
1818	KPNIH1_09905	KPNRH_03359	VK055_RS06850	ecl8_03070		Yes	No	No	No
1819	KPNIH1_09910	KPNRH_03358	VK055_RS06845	ecl8_03069		No	No	No	No
1820	KPNIH1_09915	KPNRH_03357	VK055_RS06840	ecl8_03068		Yes	No	No	No
1821	KPNIH1_09920	KPNRH_03356	VK055_RS06835	ecl8_03067		No	No	No	No
1822	KPNIH1_09925	KPNRH_03355	VK055_RS06830	ecl8_03066		No	No	No	No
1823	KPNIH1_09930	KPNRH_03354	VK055_RS06825	ecl8_03065		No	No	No	No
1824	KPNIH1_09935	KPNRH_03353	VK055_RS06815	ecl8_03064		No	No	No	No
1825	KPNIH1_09940	KPNRH_03352	VK055_RS06805	ecl8_03063		Yes	No	No	No
1826	KPNIH1_09945	KPNRH_03351	VK055_RS06800	ecl8_03062		No	No	No	No
1827	KPNIH1_09950	KPNRH_03350	VK055_RS06795	ecl8_03061		No	No	No	No
1828	KPNIH1_09955	KPNRH_03349	VK055_RS06785	ecl8_03060		Yes	Yes	Yes	Yes
1829	KPNIH1_09960	KPNRH_03348	VK055_RS06780	ecl8_03059		Yes	Yes	Yes	Yes
1830	KPNIH1_09965	KPNRH_03347	VK055_RS06775	ecl8_03058		Yes	Yes	Yes	Yes
1831	KPNIH1_09975	KPNRH_03345	VK055_RS06765	ecl8_03056		No	No	No	No
1832	KPNIH1_09980	KPNRH_03344	VK055_RS06760	ecl8_03055		No	No	No	No
1833	KPNIH1_09985	KPNRH_03343	VK055_RS06710	ecl8_03044;ecl8_03045		No	No	No	No
1834	KPNIH1_09995	KPNRH_03341	VK055_RS06700	ecl8_03040		No	No	No	No
1835	KPNIH1_10000	KPNRH_03340	VK055_RS06695	ecl8_03039		No	No	No	No
1836	KPNIH1_10005	KPNRH_03339	VK055_RS06690	ecl8_03038		No	No	No	No
1837	KPNIH1_10010	KPNRH_03338	VK055_RS06685	ecl8_03037		No	No	No	No
1838	KPNIH1_10015	KPNRH_03337	VK055_RS06680	ecl8_03036		No	No	No	No
1839	KPNIH1_10020	KPNRH_03336	VK055_RS06675	ecl8_03035		No	No	No	No
1840	KPNIH1_10025	KPNRH_03335	VK055_RS06670	ecl8_03034		No	No	No	No
1841	KPNIH1_10030	KPNRH_03334	VK055_RS06665	ecl8_03033		No	No	No	No
1842	KPNIH1_10035	KPNRH_03333	VK055_RS06660	ecl8_03032		No	No	No	No
1843	KPNIH1_10040	KPNRH_03332	VK055_RS06655	ecl8_03031		No	No	No	No
1844	KPNIH1_10045	KPNRH_03331	VK055_RS06650	ecl8_03030		Yes	Yes	Yes	Yes
1845	KPNIH1_10050	KPNRH_03330	VK055_RS06645	ecl8_03029		No	No	Yes	No
1846	KPNIH1_10055	KPNRH_03329	VK055_RS06640	ecl8_03028		Yes	Yes	Yes	Yes
1847	KPNIH1_10060	KPNRH_03328	VK055_RS06635	ecl8_03027		No	No	No	No
1848	KPNIH1_10065	KPNRH_03327	VK055_RS06630	ecl8_03026		No	No	No	No
1849	KPNIH1_10070	KPNRH_03326	VK055_RS06625	ecl8_03019;ecl8_03025		Yes	Yes	Yes	Yes
1850	KPNIH1_10075	KPNRH_03325	VK055_RS06620	ecl8_03018		No	No	No	No
1851	KPNIH1_10080	KPNRH_03324	VK055_RS06615	ecl8_03017		No	No	No	No
1852	KPNIH1_10085	KPNRH_03323	VK055_RS06610	ecl8_03016		No	No	No	No
1853	KPNIH1_10090	KPNRH_03322	VK055_RS06600	ecl8_03015		No	No	No	No
1854	KPNIH1_10095	KPNRH_03321	VK055_RS06595	ecl8_03014		No	No	No	No
1855	KPNIH1_10100	KPNRH_03320	VK055_RS06585	ecl8_03013		No	No	No	Yes
1856	KPNIH1_10105	KPNRH_03319	VK055_RS06580	ecl8_03012		Yes	No	No	No
1857	KPNIH1_10110	KPNRH_03318	VK055_RS06575	ecl8_03011		No	No	No	No
1858	KPNIH1_10115	KPNRH_03317	VK055_RS06570	ecl8_03010		No	No	No	No
1859	KPNIH1_10120	KPNRH_03316	VK055_RS06565	ecl8_03009		No	No	No	No
1860	KPNIH1_10125	KPNRH_03315	VK055_RS06560	ecl8_03008		No	No	No	No
1861	KPNIH1_10130	KPNRH_03314	VK055_RS06555	ecl8_03007		No	No	No	No
1862	KPNIH1_10140		VK055_RS06550	ecl8_03005		No	No	No	No
1863	KPNIH1_10150	KPNRH_03312	VK055_RS06540	ecl8_03004		No	No	No	No
1864	KPNIH1_10160	KPNRH_03311	VK055_RS06530	ecl8_03002;ecl8_03003		No	No	No	No
1865	KPNIH1_10165	KPNRH_03310	VK055_RS06525	ecl8_03001		No	No	No	No
1866	KPNIH1_10170	KPNRH_03309	VK055_RS06520	ecl8_02999;ecl8_03000		No	No	No	No
1867	KPNIH1_10175	KPNRH_03308	VK055_RS06515	ecl8_02998		No	No	No	No
1868	KPNIH1_10180	KPNRH_03307	VK055_RS06510	ecl8_02997		No	No	No	No
1869	KPNIH1_10185	KPNRH_03306	VK055_RS06495	ecl8_02996		No	No	No	No
1870	KPNIH1_10190	KPNRH_03305	VK055_RS06490	ecl8_02995		No	No	No	No
1871	KPNIH1_10195	KPNRH_03304	VK055_RS06485	ecl8_02994		No	No	No	No
1872	KPNIH1_10205	KPNRH_03303	VK055_RS27980	ecl8_02993		No	No	No	No
1873	KPNIH1_10210	KPNRH_03302	VK055_RS06470	ecl8_02992		No	No	No	No
1874	KPNIH1_10215	KPNRH_03301	VK055_RS06465	ecl8_02991		Yes	No	No	No
1875	KPNIH1_10220	KPNRH_03300	VK055_RS06460	ecl8_02990		No	No	No	No
1876	KPNIH1_10225	KPNRH_03299	VK055_RS06455	ecl8_02989		No	No	No	No
1877	KPNIH1_10230	KPNRH_03298	VK055_RS06450	ecl8_02988		Yes	No	No	No
1878	KPNIH1_10235	KPNRH_03297	VK055_RS06445	ecl8_02987		No	No	No	No
1879	KPNIH1_10240	KPNRH_03296	VK055_RS06440	ecl8_02986		No	No	No	No
1880	KPNIH1_10245	KPNRH_03295	VK055_RS06435	ecl8_02985		No	No	No	No
1881	KPNIH1_10250	KPNRH_03294	VK055_RS06430	ecl8_02984		Yes	No	No	No
1882	KPNIH1_10255	KPNRH_03293	VK055_RS06425	ecl8_02983		No	No	No	No
1883	KPNIH1_10260	KPNRH_03292	VK055_RS06420	ecl8_02982		No	No	No	No
1884	KPNIH1_10270	KPNRH_03289	VK055_RS06415	ecl8_02981		No	No	No	No
1885	KPNIH1_10275	KPNRH_03288	VK055_RS06410	ecl8_02980		No	No	No	No
1886	KPNIH1_10280	KPNRH_03287	VK055_RS06405	ecl8_02979		No	No	No	No
1887	KPNIH1_10285	KPNRH_03286	VK055_RS06400	ecl8_02978		No	No	No	No
1888	KPNIH1_10290	KPNRH_03285	VK055_RS06395	ecl8_02977		No	No	No	No
1889	KPNIH1_10295	KPNRH_03284	VK055_RS06390	ecl8_02976		No	No	No	No
1890	KPNIH1_10300	KPNRH_03283	VK055_RS06380	ecl8_02975		No	No	No	No
1891	KPNIH1_10305	KPNRH_03282	VK055_RS06375	ecl8_02974		No	No	No	No
1892	KPNIH1_10310	KPNRH_03281	VK055_RS06370	ecl8_02973		No	No	No	No
1893	KPNIH1_10315	KPNRH_03280	VK055_RS06365	ecl8_02972		No	No	No	No
1894	KPNIH1_10320	KPNRH_03279	VK055_RS06360	ecl8_02971		No	No	No	No
1895	KPNIH1_10325	KPNRH_03278	VK055_RS06355	ecl8_02970		No	No	No	No
1896	KPNIH1_10330	KPNRH_03277	VK055_RS06350	ecl8_02969		No	No	No	No
1897	KPNIH1_10335	KPNRH_03276	VK055_RS06345	ecl8_02968		No	No	No	No
1898	KPNIH1_10340	KPNRH_03275	VK055_RS06340	ecl8_02967		Yes	Yes	Yes	Yes
1899	KPNIH1_10345	KPNRH_03274	VK055_RS06335	ecl8_02966		No	No	No	No
1900	KPNIH1_10350	KPNRH_03273	VK055_RS06330	ecl8_02965		No	No	No	No
1901	KPNIH1_10355	KPNRH_03272	VK055_RS06325	ecl8_02964		Yes	No	No	No
1902	KPNIH1_10360	KPNRH_03271	VK055_RS06320	ecl8_02963		No	No	No	No
1903	KPNIH1_10365	KPNRH_03270				No	No	No	No
1904	KPNIH1_10370	KPNRH_03269				No	No	No	No
1905	KPNIH1_10375	KPNRH_03268				No	No	No	No
1906	KPNIH1_10380	KPNRH_03209				No	No	No	No
1907	KPNIH1_10385	KPNRH_03208				No	No	No	No
1908	KPNIH1_10390	KPNRH_03207				No	No	No	No
1909	KPNIH1_10395	KPNRH_03206				No	No	No	No
1910	KPNIH1_10400	KPNRH_03205				No	No	No	No
1911	KPNIH1_10405	KPNRH_03204	VK055_RS06315	ecl8_02962		No	No	No	No
1912	KPNIH1_10410	KPNRH_03203	VK055_RS06310	ecl8_02961		No	No	No	No
1913	KPNIH1_10415	KPNRH_03202	VK055_RS06305	ecl8_02960		No	No	No	No
1914	KPNIH1_10420	KPNRH_03201	VK055_RS06300	ecl8_02959		No	No	No	No
1915	KPNIH1_10435	KPNRH_03198	VK055_RS06295	ecl8_02958		Yes	No	No	No
1916	KPNIH1_10440	KPNRH_03197	VK055_RS06290	ecl8_02957		No	No	No	No
1917	KPNIH1_10445	KPNRH_03196	VK055_RS29410	ecl8_02956		No	No	No	No
1918	KPNIH1_10450	KPNRH_03195	VK055_RS06280	ecl8_02955		No	No	No	No
1919	KPNIH1_10455	KPNRH_03194	VK055_RS06275	ecl8_02954		No	No	No	No
1920	KPNIH1_10460	KPNRH_03193	VK055_RS06265	ecl8_02953		Yes	No	No	No
1921	KPNIH1_10465	KPNRH_03192	VK055_RS06260	ecl8_02952		No	No	No	No
1922	KPNIH1_10470	KPNRH_03191	VK055_RS06255	ecl8_02951		No	No	No	No
1923	KPNIH1_10475	KPNRH_03190	VK055_RS06250	ecl8_02950		No	No	No	No
1924	KPNIH1_10480	KPNRH_03189	VK055_RS06245	ecl8_02948;ecl8_02949		No	No	No	No
1925	KPNIH1_10485	KPNRH_03188	VK055_RS06240	ecl8_02947		No	No	No	No
1926	KPNIH1_10490	KPNRH_03187	VK055_RS06235	ecl8_02946		No	No	No	No
1927	KPNIH1_10495	KPNRH_03186	VK055_RS06230	ecl8_02945		No	No	No	No
1928	KPNIH1_10500	KPNRH_03185	VK055_RS06225	ecl8_02944		No	No	No	No
1929	KPNIH1_10505	KPNRH_03184	VK055_RS06220	ecl8_02943		No	No	No	No
1930	KPNIH1_10510	KPNRH_03183	VK055_RS06215	ecl8_02942		No	No	No	No
1931	KPNIH1_10515	KPNRH_03182	VK055_RS06210	ecl8_02941		No	No	No	No
1932	KPNIH1_10520	KPNRH_03181	VK055_RS06205	ecl8_02940		No	No	No	No
1933	KPNIH1_10525	KPNRH_03180	VK055_RS06200	ecl8_02939		No	No	No	No
1934	KPNIH1_10530	KPNRH_03179	VK055_RS06195	ecl8_02938		No	No	No	No
1935	KPNIH1_10535	KPNRH_03178	VK055_RS06185	ecl8_02937		No	No	No	No
1936	KPNIH1_10540	KPNRH_03177	VK055_RS06180	ecl8_02936		No	No	No	No
1937	KPNIH1_10545	KPNRH_03176	VK055_RS06175	ecl8_02935		Yes	Yes	Yes	Yes
1938	KPNIH1_10550	KPNRH_03175	VK055_RS06170	ecl8_02934		Yes	No	No	No
1939	KPNIH1_10555	KPNRH_03174	VK055_RS06165	ecl8_02933		No	No	No	No
1940	KPNIH1_10560	KPNRH_03173	VK055_RS06155	ecl8_02932		No	No	No	No
1941	KPNIH1_10565	KPNRH_03172	VK055_RS06150	ecl8_02931		No	No	No	No
1942	KPNIH1_10570	KPNRH_03171	VK055_RS06145	ecl8_02930		No	No	No	No
1943	KPNIH1_10575	KPNRH_03170	VK055_RS06140	ecl8_02929		No	No	No	No
1944	KPNIH1_10580	KPNRH_03169	VK055_RS06135	ecl8_02928		No	No	No	No
1945	KPNIH1_10585	KPNRH_03168	VK055_RS06130	ecl8_02927		No	No	No	No
1946	KPNIH1_10590	KPNRH_03167	VK055_RS06125	ecl8_02926		No	No	No	No
1947	KPNIH1_10595	KPNRH_03166	VK055_RS06120	ecl8_02925		No	No	No	No
1948	KPNIH1_10600	KPNRH_03165	VK055_RS06115	ecl8_02924		Yes	No	No	No
1949	KPNIH1_10605	KPNRH_03164	VK055_RS06110	ecl8_02923		No	No	No	No
1950	KPNIH1_10610	KPNRH_03163	VK055_RS06105	ecl8_02922		No	No	No	No
1951	KPNIH1_10615	KPNRH_03162	VK055_RS06100	ecl8_02921		No	No	No	No
1952	KPNIH1_10620	KPNRH_03161	VK055_RS06095	ecl8_02920		No	No	No	No
1953	KPNIH1_10625	KPNRH_03160	VK055_RS06090	ecl8_02919		No	No	No	No
1954	KPNIH1_10630	KPNRH_03159	VK055_RS06085	ecl8_02918		No	No	No	No
1955	KPNIH1_10635	KPNRH_03158	VK055_RS06080	ecl8_02917		No	No	No	No
1956	KPNIH1_10640	KPNRH_03157	VK055_RS06075	ecl8_02916		No	No	No	No
1957	KPNIH1_10645	KPNRH_03156	VK055_RS06070	ecl8_02915		No	No	No	No
1958	KPNIH1_10650	KPNRH_03155	VK055_RS06065	ecl8_02914		Yes	No	No	No
1959	KPNIH1_10655	KPNRH_03154	VK055_RS06060	ecl8_02913		No	No	No	No
1960	KPNIH1_10660	KPNRH_03153	VK055_RS06055	ecl8_02912		No	No	No	No
1961	KPNIH1_10665;KPNIH1_16425	KPNRH_02003;KPNRH_03151;KPNRH_03152	VK055_RS00585;VK055_RS06050	ecl8_01862;ecl8_02911		Yes	Yes	No	Yes
1962	KPNIH1_10670	KPNRH_03150	VK055_RS06045	ecl8_02910		Yes	No	No	No
1963	KPNIH1_10675	KPNRH_03149	VK055_RS06040	ecl8_02909		Yes	No	No	No
1964	KPNIH1_10680	KPNRH_03148	VK055_RS06035			No	No	No	No
1965	KPNIH1_10685	KPNRH_03147	VK055_RS06030			No	No	No	No
1966	KPNIH1_10690	KPNRH_03146	VK055_RS06025			No	No	No	No
1967	KPNIH1_10695	KPNRH_03145	VK055_RS06020			No	No	No	No
1968	KPNIH1_10700	KPNRH_03144	VK055_RS06015	ecl8_02908		No	No	No	No
1969	KPNIH1_10705	KPNRH_03143	VK055_RS06010	ecl8_02907		No	No	No	No
1970	KPNIH1_10710	KPNRH_03142	VK055_RS06005	ecl8_02906		No	No	No	No
1971	KPNIH1_10715	KPNRH_03141	VK055_RS06000	ecl8_02905		No	No	No	No
1972	KPNIH1_10720	KPNRH_03140	VK055_RS05995	ecl8_02904		No	No	No	Yes
1973	KPNIH1_10725	KPNRH_03138	VK055_RS05990	ecl8_02903		No	No	No	No
1974	KPNIH1_10730	KPNRH_03137	VK055_RS05985	ecl8_02902		No	No	No	No
1975	KPNIH1_10735	KPNRH_03136	VK055_RS05980	ecl8_02901		No	No	No	No
1976	KPNIH1_10740	KPNRH_03135	VK055_RS05975	ecl8_02899;ecl8_02900		No	No	No	No
1977	KPNIH1_10745	KPNRH_03134	VK055_RS05970	ecl8_02898		No	No	No	No
1978	KPNIH1_10750	KPNRH_03133	VK055_RS05965	ecl8_02897		No	No	No	No
1979	KPNIH1_10755	KPNRH_03132	VK055_RS05960	ecl8_02896		No	No	No	No
1980	KPNIH1_10760		VK055_RS05955			Yes	No	No	No
1981	KPNIH1_10765	KPNRH_03131	VK055_RS05950	ecl8_02895		No	No	No	No
1982	KPNIH1_10770	KPNRH_03130	VK055_RS05945	ecl8_02894		Yes	No	No	No
1983	KPNIH1_10785	KPNRH_03128	VK055_RS05930	ecl8_02892		No	Yes	No	Yes
1984	KPNIH1_10795	KPNRH_03126	VK055_RS05915	ecl8_02890		No	No	No	No
1985	KPNIH1_10800	KPNRH_03125	VK055_RS05910	ecl8_02889		Yes	Yes	Yes	Yes
1986	KPNIH1_10805	KPNRH_03124	VK055_RS05905	ecl8_02888		Yes	No	No	No
1987	KPNIH1_10810	KPNRH_03123	VK055_RS05900	ecl8_02887		Yes	No	Yes	Yes
1988	KPNIH1_10815	KPNRH_03122	VK055_RS05895	ecl8_02886		Yes	Yes	Yes	Yes
1989	KPNIH1_10820	KPNRH_03121	VK055_RS05890	ecl8_02885		No	No	No	No
1990	KPNIH1_10825	KPNRH_03120	VK055_RS05885	ecl8_02884		No	No	No	No
1991	KPNIH1_10830	KPNRH_03119	VK055_RS05880	ecl8_02883		No	No	No	No
1992	KPNIH1_10835	KPNRH_03118	VK055_RS05870	ecl8_02882		No	No	No	No
1993	KPNIH1_10840	KPNRH_03117	VK055_RS05865	ecl8_02881		No	No	No	No
1994	KPNIH1_10845	KPNRH_03116	VK055_RS05860	ecl8_02880		No	No	No	No
1995	KPNIH1_10850	KPNRH_03115	VK055_RS05855	ecl8_02879;ecl8_02877;ecl8_02878		No	No	No	Yes
1996	KPNIH1_10855	KPNRH_03114	VK055_RS05845	ecl8_02876		Yes	Yes	Yes	Yes
1997	KPNIH1_10860	KPNRH_03113	VK055_RS05840	ecl8_02875		No	No	No	No
1998	KPNIH1_10865	KPNRH_03112	VK055_RS05835	ecl8_02874		No	No	No	No
[truncated: 4,116 more rows]

## Sheet: Excluded locus tags
NZ_CP009208 (ATCC43816)			NZ_FR997879 (RH201207)			NZ_CP008827.1 (KPNIH1)
ATCC 43816 Exclusion List			RH201207 Exclusion List			KPNIH1 Exclusion List
Locus Tag	Product		Locus Tag	Product		KPNIH1_00075	16S ribosomal RNA
VK055_RS00165	tRNA-Gly		KPNRH_00092	tRNA		KPNIH1_00080	tRNA-Glu
VK055_RS00170	tRNA-Cys		KPNRH_00214	tRNA		KPNIH1_00085	23S ribosomal RNA
VK055_RS00175	tRNA-Leu		KPNRH_00215	ncRNA		KPNIH1_00090	5S ribosomal RNA
VK055_RS26365	RtT sRNA		KPNRH_00443	rRNA		KPNIH1_00570	16S ribosomal RNA
VK055_RS01200	tRNA-Tyr		KPNRH_00445	rRNA		KPNIH1_00575	tRNA-Ile
VK055_RS26370	RtT sRNA		KPNRH_00446	rRNA		KPNIH1_00580	tRNA-Ala
VK055_RS01205	tRNA-Tyr		KPNRH_00447	tRNA		KPNIH1_00585	23S ribosomal RNA
VK055_RS02365	tRNA-Val		KPNRH_00448	rRNA		KPNIH1_00590	5S ribosomal RNA
VK055_RS02370	tRNA-Val		KPNRH_00555	tRNA		KPNIH1_00595	tRNA-Asp
VK055_RS02375	tRNA-Val		KPNRH_00560	tRNA		KPNIH1_00600	tRNA-Trp
VK055_RS07095	tRNA-Ser		KPNRH_00608	RNase_P_RNA		KPNIH1_00775	tRNA-Arg
VK055_RS26385	RtT sRNA		KPNRH_00669	tRNA		KPNIH1_00780	tRNA-His
VK055_RS07115	tRNA-Ser		KPNRH_00803	tRNA		KPNIH1_00785	tRNA-Leu
VK055_RS07435	tRNA-Ser		KPNRH_00858	ncRNA		KPNIH1_00790	tRNA-Pro
VK055_RS26390	RtT sRNA		KPNRH_00888	tRNA		KPNIH1_01035	16S ribosomal RNA
VK055_RS08880	tRNA-Lys		KPNRH_01028	tRNA		KPNIH1_01040	tRNA-Ile
VK055_RS08885	tRNA-Lys		KPNRH_01029	tRNA		KPNIH1_01045	tRNA-Ala
VK055_RS08890	tRNA-Lys		KPNRH_01030	tRNA		KPNIH1_01050	23S ribosomal RNA
VK055_RS08895	tRNA-Val		KPNRH_01174	tRNA		KPNIH1_01055	5S ribosomal RNA
VK055_RS08900	tRNA-Lys		KPNRH_01175	tRNA		KPNIH1_01075	tRNA-Thr
VK055_RS08905	tRNA-Val		KPNRH_01176	tRNA		KPNIH1_01080	tRNA-Tyr
VK055_RS08910	tRNA-Lys		KPNRH_01177	tRNA		KPNIH1_01085	tRNA-Gly
VK055_RS09200	tRNA-Met		KPNRH_01178	tRNA		KPNIH1_01090	tRNA-Thr
VK055_RS09205	tRNA-Leu		KPNRH_01239	tmRNA		KPNIH1_01260	16S ribosomal RNA
VK055_RS09210	tRNA-Gln		KPNRH_01270	rRNA		KPNIH1_01265	tRNA-Glu
VK055_RS09215	tRNA-Gln		KPNRH_01271	tRNA		KPNIH1_01270	23S ribosomal RNA
VK055_RS09220	tRNA-Met		KPNRH_01273	rRNA		KPNIH1_01275	5S ribosomal RNA
VK055_RS09225	tRNA-Gln		KPNRH_01274	rRNA		KPNIH1_02010	tRNA-Phe
VK055_RS09230	tRNA-Gln		KPNRH_01384	tRNA		KPNIH1_02230	tRNA-Gly
VK055_RS10325	tRNA-Arg		KPNRH_01494	tRNA		KPNIH1_02235	tRNA-Gly
VK055_RS26415	signal recognition particle sRNA small type		KPNRH_01495	tRNA		KPNIH1_02240	tRNA-Gly
VK055_RS11420	tRNA-Thr		KPNRH_01496	tRNA		KPNIH1_02920	tRNA-Leu
VK055_RS11695	tRNA-Asp		KPNRH_01497	tRNA		KPNIH1_03175	16S ribosomal RNA
VK055_RS11750	tRNA-Asp		KPNRH_01501	tRNA		KPNIH1_03180	tRNA-Glu
VK055_RS11755	5S ribosomal RNA		KPNRH_01502	tRNA		KPNIH1_03185	23S ribosomal RNA
VK055_RS11760	23S ribosomal RNA		KPNRH_01519	tRNA		KPNIH1_03190	5S ribosomal RNA
VK055_RS11765	tRNA-Ala		KPNRH_01623	tRNA		KPNIH1_03640	tRNA-Leu
VK055_RS11770	tRNA-Ile		KPNRH_01830	tRNA		KPNIH1_03645	tRNA-Leu
VK055_RS11775	16S ribosomal RNA		KPNRH_01832	tRNA		KPNIH1_03650	tRNA-Leu
VK055_RS13080	tRNA-Leu		KPNRH_01840	tRNA		KPNIH1_04970	16S ribosomal RNA
VK055_RS13085	tRNA-Leu		KPNRH_01892	tRNA		KPNIH1_04975	tRNA-Ile
VK055_RS13090	tRNA-Leu		KPNRH_01894	tRNA		KPNIH1_04980	tRNA-Ala
VK055_RS13545	5S ribosomal RNA		KPNRH_01918	tRNA		KPNIH1_04985	23S ribosomal RNA
VK055_RS13550	23S ribosomal RNA		KPNRH_01919	tRNA		KPNIH1_04990	5S ribosomal RNA
VK055_RS13555	tRNA-Glu		KPNRH_01920	tRNA		KPNIH1_04995	tRNA-Asp
VK055_RS13560	16S ribosomal RNA		KPNRH_02129	ncRNA		KPNIH1_05050	tRNA-Asp
VK055_RS13920	tRNA-Leu		KPNRH_02130	ncRNA		KPNIH1_05340	tRNA-Thr
VK055_RS14605	tRNA-Gly		KPNRH_02131	ncRNA		KPNIH1_29380	signal recognition particle sRNA small type
VK055_RS14610	tRNA-Gly		KPNRH_02132	tRNA		KPNIH1_06425	tRNA-Arg
VK055_RS14615	tRNA-Gly		KPNRH_02133	ncRNA		KPNIH1_06565	tRNA-Asn
VK055_RS14825	tRNA-Phe		KPNRH_02134	tRNA		KPNIH1_07915	tRNA-Gln
VK055_RS15560	5S ribosomal RNA		KPNRH_02182	antisense_RNA		KPNIH1_07920	tRNA-Gln
VK055_RS15565	23S ribosomal RNA		KPNRH_02332	tRNA		KPNIH1_07925	tRNA-Met
VK055_RS15570	tRNA-Glu		KPNRH_02333	tRNA		KPNIH1_07930	tRNA-Gln
VK055_RS15575	16S ribosomal RNA		KPNRH_02334	tRNA		KPNIH1_07935	tRNA-Gln
VK055_RS15750	tRNA-Thr		KPNRH_03237	tRNA		KPNIH1_07940	tRNA-Leu
VK055_RS15755	tRNA-Gly		KPNRH_03409	tRNA		KPNIH1_07945	tRNA-Met
VK055_RS15760	tRNA-Tyr		KPNRH_03413	tRNA		KPNIH1_08235	tRNA-Lys
VK055_RS15765	tRNA-Thr		KPNRH_03455	tRNA		KPNIH1_08240	tRNA-Val
VK055_RS15785	5S ribosomal RNA		KPNRH_03747	tRNA		KPNIH1_08245	tRNA-Lys
VK055_RS15790	23S ribosomal RNA		KPNRH_03749	tRNA		KPNIH1_08250	tRNA-Val
VK055_RS15795	tRNA-Ala		KPNRH_03751	tRNA		KPNIH1_08255	tRNA-Lys
VK055_RS15800	tRNA-Ile		KPNRH_03752	tRNA		KPNIH1_08260	tRNA-Lys
VK055_RS15805	16S ribosomal RNA		KPNRH_03753	tRNA		KPNIH1_08265	tRNA-Lys
VK055_RS16050	tRNA-Pro		KPNRH_03754	tRNA		KPNIH1_09750	tRNA-Ser
VK055_RS16055	tRNA-Leu		KPNRH_03755	tRNA		KPNIH1_09970	tRNA-Ser
VK055_RS16060	tRNA-His		KPNRH_03809	tRNA		KPNIH1_29405	RtT sRNA
VK055_RS16065	tRNA-Arg		KPNRH_03810	tRNA		KPNIH1_29410	RtT sRNA
VK055_RS16240	tRNA-Trp		KPNRH_03811	tRNA		KPNIH1_09990	tRNA-Ser
VK055_RS16245	tRNA-Asp		KPNRH_03812	tRNA		KPNIH1_15215	tRNA-Val
VK055_RS16250	5S ribosomal RNA		KPNRH_03813	tRNA		KPNIH1_15220	tRNA-Val
VK055_RS16255	23S ribosomal RNA		KPNRH_03814	tRNA		KPNIH1_15225	tRNA-Val
VK055_RS16260	tRNA-Ala		KPNRH_03815	tRNA		KPNIH1_29420	antisense sRNA RprA
VK055_RS16265	tRNA-Ile		KPNRH_04080	tRNA		KPNIH1_16290	tRNA-Tyr
VK055_RS16270	16S ribosomal RNA		KPNRH_04110	tRNA		KPNIH1_29425	RtT sRNA
VK055_RS16715	5S ribosomal RNA		KPNRH_04177	SRP_RNA		KPNIH1_16295	tRNA-Tyr
VK055_RS16720	23S ribosomal RNA		KPNRH_04321	tRNA		KPNIH1_29430	RtT sRNA
VK055_RS16725	tRNA-Glu		KPNRH_04378	tRNA		KPNIH1_29435	RtT sRNA
VK055_RS16730	16S ribosomal RNA		KPNRH_04389	tRNA		KPNIH1_29440	RtT sRNA
VK055_RS17450	tRNA-Sec		KPNRH_04390	rRNA		KPNIH1_17380	tRNA-Leu
VK055_RS18055	tRNA-Pro		KPNRH_04391	rRNA		KPNIH1_17385	tRNA-Cys
VK055_RS19215	16S ribosomal RNA		KPNRH_04393	tRNA		KPNIH1_17390	tRNA-Gly
VK055_RS19220	23S ribosomal RNA		KPNRH_04394	tRNA		KPNIH1_17505	tRNA-Ser
VK055_RS19225	5S ribosomal RNA		KPNRH_04395	rRNA		KPNIH1_17515	tRNA-Asn
VK055_RS19230	tRNA-Thr		KPNRH_04651	tRNA		KPNIH1_17550	tRNA-Asn
VK055_RS19235	5S ribosomal RNA		KPNRH_04652	tRNA		KPNIH1_17590	tRNA-Asn
VK055_RS19700	tRNA-Leu		KPNRH_04653	tRNA		KPNIH1_17605	tRNA-Asn
VK055_RS19730	tRNA-Met		KPNRH_04738	rRNA		KPNIH1_18615	tRNA-Pro
VK055_RS20210	tRNA-Ile		KPNRH_04739	rRNA		KPNIH1_19150	tRNA-Arg
VK055_RS20625	tRNA-Phe		KPNRH_04741	tRNA		KPNIH1_19245	tRNA-Ala
VK055_RS26425	6S RNA		KPNRH_04742	rRNA		KPNIH1_19250	tRNA-Ala
VK055_RS21105	tRNA-Gly		KPNRH_04790	tRNA		KPNIH1_19270	tRNA-Val
VK055_RS21980	tRNA-Met		KPNRH_04918	tRNA		KPNIH1_19275	tRNA-Val
VK055_RS21985	tRNA-Met		KPNRH_04919	tRNA		KPNIH1_19280	tRNA-Val
VK055_RS22705	tRNA-Ser		KPNRH_04920	tRNA		KPNIH1_19285	tRNA-Lys
VK055_RS22710	tRNA-Arg		KPNRH_04960	tRNA		KPNIH1_19845	tRNA-Arg
VK055_RS22715	tRNA-Arg		KPNRH_05098	rRNA		KPNIH1_20375	5S ribosomal RNA
VK055_RS22720	tRNA-Arg		KPNRH_05099	rRNA		KPNIH1_20380	23S ribosomal RNA
VK055_RS22730	tRNA-Arg		KPNRH_05101	tRNA		KPNIH1_20385	tRNA-Glu
VK055_RS26430	transfer-messenger RNA		KPNRH_05102	rRNA		KPNIH1_20390	16S ribosomal RNA
VK055_RS23200	16S ribosomal RNA		KPNRH_05137	tRNA		KPNIH1_29450	transfer-messenger RNA
VK055_RS23205	tRNA-Glu		KPNRH_05138	tRNA		KPNIH1_21080	tRNA-Arg
VK055_RS23210	23S ribosomal RNA		KPNRH_05139	tRNA		KPNIH1_21090	tRNA-Arg
VK055_RS23215	5S ribosomal RNA		KPNRH_05140	tRNA		KPNIH1_21095	tRNA-Arg
VK055_RS24100	tRNA-Lys		KPNRH_05144	rRNA		KPNIH1_21100	tRNA-Arg
VK055_RS24105	tRNA-Val		KPNRH_05145	rRNA		KPNIH1_21105	tRNA-Ser
VK055_RS24110	tRNA-Val		KPNRH_05147	tRNA		KPNIH1_21835	tRNA-Met
VK055_RS24115	tRNA-Val		KPNRH_05148	tRNA		KPNIH1_21840	tRNA-Met
VK055_RS24135	tRNA-Ala		KPNRH_05149	rRNA		KPNIH1_21845	tRNA-Met
VK055_RS24140	tRNA-Ala		KPNRH_05196	tRNA		KPNIH1_22555	tRNA-Gly
VK055_RS24235	tRNA-Arg		KPNRH_05197	tRNA		KPNIH1_29455	6S RNA
VK055_RS24790	tRNA-Pro		KPNRH_05198	tRNA		KPNIH1_22995	tRNA-Phe
VK055_RS25960	tRNA-Asn		KPNRH_05199	tRNA		KPNIH1_23700	tRNA-Ile
VK055_RS25975	tRNA-Asn		KPNRH_05233	tRNA		KPNIH1_29370	RNase P RNA component class A
VK055_RS26015	tRNA-Asn		KPNRH_05234	tRNA		KPNIH1_24250	tRNA-Met
VK055_RS26040	tRNA-Asn		KPNRH_05235	rRNA		KPNIH1_24280	tRNA-Leu
VK055_RS26050	tRNA-Ser		KPNRH_05236	rRNA		KPNIH1_24810	5S ribosomal RNA
			KPNRH_05238	tRNA		KPNIH1_24815	tRNA-Thr
			KPNRH_05239	tRNA		KPNIH1_24820	5S ribosomal RNA
			KPNRH_05240	rRNA		KPNIH1_24825	23S ribosomal RNA
			KPNRH_05339	rRNA		KPNIH1_24830	16S ribosomal RNA
			KPNRH_05340	rRNA		KPNIH1_29460	RtT sRNA
			KPNRH_05342	tRNA		KPNIH1_26000	tRNA-Pro
			KPNRH_05343	rRNA		KPNIH1_26620	tRNA-Sec

## Sheet: ECL8 IFR Manual (E) Curation
Locus_tag	Gene_name	Unclear	Unclear Match with IFR?	Curate (E)
ecl8_00113	spoT	TRUE	TRUE	1
ecl8_00122	ecl8_00122	TRUE	TRUE	1
ecl8_00141	rfaG	TRUE	FALSE
ecl8_00147	rfaC	TRUE	TRUE	1
ecl8_00292	ftsX	TRUE	FALSE
ecl8_00332	nfuA	TRUE	FALSE
ecl8_00358	rpe	TRUE	FALSE
ecl8_00364	ecl8_00364	TRUE	FALSE
ecl8_00385	dauR	TRUE	TRUE
ecl8_00533	rbfA	TRUE	FALSE
ecl8_00556	ecl8_00556	TRUE	FALSE
ecl8_00589	lsrR_1	TRUE	FALSE
ecl8_00605	yqjI	TRUE	FALSE
ecl8_00633	rpsU	TRUE	FALSE
ecl8_00695	dmlR_4	TRUE	FALSE
ecl8_00703	fimC_1	TRUE	FALSE
ecl8_00739	tktA_1	TRUE	TRUE	1
ecl8_00759	msrAB	TRUE	FALSE
ecl8_00760	bdbD	TRUE	FALSE
ecl8_00782	evgA_2	TRUE	FALSE
ecl8_00785	evgA_3	TRUE	FALSE
ecl8_00805	hdeD_2	TRUE	FALSE
ecl8_00897	recC	TRUE	TRUE	1
ecl8_00899	recB	TRUE	FALSE
ecl8_00915	ccmL	TRUE	FALSE
ecl8_00923	pduD_2	TRUE	FALSE
ecl8_00933	cbiE	TRUE	FALSE
ecl8_00934	cbiT	TRUE	FALSE
ecl8_00936	cbiG	TRUE	FALSE
ecl8_00937	cbiH	TRUE	TRUE	1
ecl8_00942	cbiN	TRUE	FALSE
ecl8_00946	cobU	TRUE	FALSE
ecl8_00959	ydjF	TRUE	FALSE
ecl8_00966	ygdG	TRUE	FALSE
ecl8_00969	ecl8_00969	TRUE	FALSE
ecl8_00971	metN_1	TRUE	FALSE
ecl8_00975	soxC	TRUE	FALSE
ecl8_00988	garK_2	TRUE	FALSE
ecl8_01008	ftsB	TRUE	TRUE	1
ecl8_01019	hosA	TRUE	FALSE
ecl8_01029	ecl8_01029	TRUE	TRUE	1
ecl8_01039	hmuU_1	TRUE	FALSE
ecl8_01053	mak_1	TRUE	FALSE
ecl8_01065	hypB	TRUE	FALSE
ecl8_01081	hypF	TRUE	FALSE
ecl8_01083	norW	TRUE	FALSE
ecl8_01094	fepC_1	TRUE	FALSE
ecl8_01112	nimR_1	TRUE	FALSE
ecl8_01113	leuA_1	TRUE	FALSE
ecl8_01138	acoR_1	TRUE	FALSE
ecl8_01155	ecl8_01155	TRUE	FALSE
ecl8_01161	rob_1	TRUE	FALSE
ecl8_01173	smpB	TRUE	FALSE
ecl8_01187	ecl8_01187	TRUE	FALSE
ecl8_01188	ecl8_01188	TRUE	TRUE	1
ecl8_01217	rpoE	TRUE	FALSE
ecl8_01221	lepA	TRUE	FALSE
ecl8_01231	tadA	TRUE	TRUE	1
ecl8_01240	yphA_1	TRUE	FALSE
ecl8_01253	iscR	TRUE	FALSE
ecl8_01257	hscB	TRUE	FALSE
ecl8_01267	pbpC	TRUE	FALSE
ecl8_01270	rodZ	TRUE	FALSE
ecl8_01279	guaB	TRUE	FALSE
ecl8_01280	guaA	TRUE	FALSE
ecl8_01306	tmcA	TRUE	FALSE
ecl8_01320	eutQ	TRUE	FALSE
ecl8_01321	ecl8_01321	TRUE	FALSE
ecl8_01322	eutD	TRUE	FALSE
ecl8_01325	adhE_3	TRUE	FALSE
ecl8_01326	ftsA_1	TRUE	FALSE
ecl8_01327	mdh_2	TRUE	FALSE
ecl8_01328	ecl8_01328	TRUE	FALSE
ecl8_01329	ecl8_01329	TRUE	FALSE
ecl8_01330	eutB_1	TRUE	FALSE
ecl8_01332	eutL	TRUE	FALSE
ecl8_01345	cysM	TRUE	FALSE
ecl8_01349	ecl8_01349	TRUE	FALSE
ecl8_01350	crr	TRUE	FALSE
ecl8_01381	guaD_1	TRUE	FALSE
ecl8_01448	aroC	TRUE	FALSE
ecl8_01453	mnmC	TRUE	FALSE
ecl8_01458	usg	TRUE	TRUE	1
ecl8_01463	dedD	TRUE	FALSE
ecl8_01471	hisP	TRUE	TRUE	1
ecl8_01472	ecl8_01472	TRUE	TRUE	1
ecl8_01476	yfcF	TRUE	FALSE
ecl8_01479	pta	TRUE	FALSE
ecl8_01480	ackA	TRUE	FALSE
ecl8_01503	menF	TRUE	FALSE
ecl8_01504	menD	TRUE	FALSE
ecl8_01505	menH	TRUE	FALSE
ecl8_01506	menB	TRUE	FALSE
ecl8_01507	menC	TRUE	FALSE
ecl8_01508	menE	TRUE	FALSE
ecl8_01509	nudI	TRUE	FALSE
ecl8_01516	rhmT_2	TRUE	FALSE
ecl8_01517	rhmA	TRUE	FALSE
ecl8_01519	glpB	TRUE	FALSE
ecl8_01528	atoB	TRUE	FALSE
ecl8_01529	atoE	TRUE	FALSE
ecl8_01530	atoA	TRUE	FALSE
ecl8_01531	atoD	TRUE	FALSE
ecl8_01532	atoC	TRUE	FALSE
ecl8_01533	atoS	TRUE	FALSE
ecl8_01538	apbE_1	TRUE	FALSE
ecl8_01539	ada_2	TRUE	FALSE
ecl8_01540	alkB	TRUE	FALSE
ecl8_01541	yojI	TRUE	FALSE
ecl8_01542	ecl8_01542	TRUE	FALSE
ecl8_01545	eco	TRUE	FALSE
ecl8_01548	yejM	TRUE	TRUE	1
ecl8_01552	nudK_2	TRUE	FALSE
ecl8_01554	allS_2	TRUE	FALSE
ecl8_01560	yejF_2	TRUE	FALSE
ecl8_01561	yejE	TRUE	FALSE
ecl8_01562	yejB	TRUE	FALSE
ecl8_01568	por_1	TRUE	FALSE
ecl8_01573	fruB_1	TRUE	FALSE
ecl8_01575	fruA_1	TRUE	FALSE
ecl8_01606	yehZ	TRUE	FALSE
ecl8_01607	yehY	TRUE	FALSE
ecl8_01608	yehX	TRUE	FALSE
ecl8_01610	ecl8_01610	TRUE	FALSE
ecl8_01612	btsR	TRUE	FALSE
ecl8_01616	yafP_1	TRUE	FALSE
ecl8_01618	dmlR_7	TRUE	FALSE
ecl8_01619	adeQ	TRUE	FALSE
ecl8_01620	ade2	TRUE	FALSE
ecl8_01627	araB_1	TRUE	TRUE	1
ecl8_01628	rbtD	TRUE	FALSE
ecl8_01629	degA	TRUE	FALSE
ecl8_01630	lsrR_2	TRUE	TRUE	1
ecl8_01631	mtlK	TRUE	FALSE
ecl8_01635	hxpB_1	TRUE	FALSE
ecl8_01636	gci	TRUE	FALSE
ecl8_01639	ddpC_2	TRUE	FALSE
ecl8_01642	yegS	TRUE	FALSE
ecl8_01644	baeR	TRUE	FALSE
ecl8_01645	baeS	TRUE	FALSE
ecl8_01647	mdtC	TRUE	FALSE
ecl8_01654	walK	TRUE	FALSE
ecl8_01655	dnaK_1	TRUE	FALSE
ecl8_01656	alkA	TRUE	FALSE
ecl8_01657	udk	TRUE	FALSE
ecl8_01658	dcd	TRUE	FALSE
ecl8_01677	ugd	TRUE	FALSE
ecl8_01678	wbgU	TRUE	FALSE
ecl8_01691	hisA	TRUE	FALSE
ecl8_01707	cobS	TRUE	FALSE
ecl8_01713	dmlR_8	TRUE	FALSE
ecl8_01714	ecl8_01714	TRUE	FALSE
ecl8_01722	gcvA_2	TRUE	FALSE
ecl8_01723	ecl8_01723	TRUE	FALSE
ecl8_01725	dgcP_1	TRUE	FALSE
ecl8_01726	ecl8_01726	TRUE	FALSE
ecl8_01728	ecl8_01728	TRUE	FALSE
ecl8_01764	dcm	TRUE	FALSE
ecl8_01765	vsr	TRUE	FALSE
ecl8_01799	otsB	TRUE	FALSE
ecl8_01805	yecM	TRUE	FALSE
ecl8_01808	cmoA	TRUE	FALSE
ecl8_01813	nudB	TRUE	FALSE
ecl8_01814	yebC	TRUE	FALSE
ecl8_01818	znuB	TRUE	FALSE
ecl8_01822	lpxM	TRUE	FALSE
ecl8_01823	pykA	TRUE	FALSE
ecl8_01825	zwf	TRUE	FALSE
ecl8_01826	edd	TRUE	FALSE
ecl8_01827	eda	TRUE	FALSE
ecl8_01828	purT	TRUE	FALSE
ecl8_01829	ecl8_01829	TRUE	FALSE
ecl8_01830	yebE	TRUE	FALSE
ecl8_01833	holE	TRUE	FALSE
ecl8_01835	yebZ	TRUE	FALSE
ecl8_01842	rsmF	TRUE	FALSE
ecl8_01846	proQ	TRUE	FALSE
ecl8_01855	rlmA	TRUE	FALSE
ecl8_01862	pdeD	TRUE	TRUE	1
ecl8_01864	nudL	TRUE	FALSE
ecl8_01868	dinG_1	TRUE	FALSE
ecl8_01881	nhaB	TRUE	FALSE
ecl8_01884	dadA_1	TRUE	FALSE
ecl8_01885	dadX	TRUE	FALSE
ecl8_01886	cvrA	TRUE	TRUE	1
ecl8_01887	ldcA	TRUE	FALSE
ecl8_01888	emtA	TRUE	FALSE
ecl8_01889	fhuA_1	TRUE	FALSE
ecl8_01890	treA	TRUE	FALSE
ecl8_01893	ecl8_01893	TRUE	FALSE
ecl8_01902	tdcD	TRUE	FALSE
ecl8_01903	tdcE	TRUE	FALSE
ecl8_01904	livJ_2	TRUE	FALSE
ecl8_01906	livH_3	TRUE	FALSE
ecl8_01913	kgtP_2	TRUE	FALSE
ecl8_01914	ais	TRUE	FALSE
ecl8_01922	oprF_1	TRUE	FALSE
ecl8_01929	ecl8_01929	TRUE	FALSE
ecl8_01930	ecl8_01930	TRUE	FALSE
ecl8_01932	ecl8_01932	TRUE	FALSE
ecl8_01933	thpA_1	TRUE	FALSE
ecl8_01934	ecl8_01934	TRUE	FALSE
ecl8_01945	prmC	TRUE	FALSE
ecl8_01946	ychQ	TRUE	FALSE
ecl8_01954	nasR	TRUE	FALSE
ecl8_01955	nrtA	TRUE	FALSE
ecl8_01956	cmpB	TRUE	FALSE
ecl8_01957	cmpC_1	TRUE	TRUE	1
ecl8_01958	nasD_2	TRUE	TRUE	1
ecl8_01959	nasA_1	TRUE	FALSE
ecl8_01960	nasA_2	TRUE	FALSE
ecl8_01961	nasA_3	TRUE	FALSE
ecl8_01962	ecl8_01962	TRUE	FALSE
ecl8_01963	narL	TRUE	FALSE
ecl8_01966	narG	TRUE	FALSE
ecl8_01967	narH	TRUE	FALSE
ecl8_01968	narJ	TRUE	FALSE
ecl8_01970	ecl8_01970	TRUE	FALSE
ecl8_01992	yceI	TRUE	FALSE
ecl8_01998	ecl8_01998	TRUE	TRUE	1
ecl8_02003	tonB	TRUE	FALSE
ecl8_02015	ihfA	TRUE	FALSE
ecl8_02019	ecl8_02019	TRUE	FALSE
ecl8_02020	btuC	TRUE	FALSE
ecl8_02024	mepS_2	TRUE	FALSE
ecl8_02025	ecl8_02025	TRUE	FALSE
ecl8_02026	ydiE	TRUE	FALSE
ecl8_02038	mdtH_1	TRUE	FALSE
ecl8_02039	fecE	TRUE	FALSE
ecl8_02040	hmuU_2	TRUE	FALSE
ecl8_02041	hmuT_2	TRUE	FALSE
ecl8_02042	cysL_1	TRUE	FALSE
ecl8_02043	ecl8_02043	TRUE	FALSE
ecl8_02044	icaR	TRUE	FALSE
ecl8_02045	mdtN_2	TRUE	FALSE
ecl8_02046	czcA	TRUE	FALSE
ecl8_02047	cnrA	TRUE	FALSE
ecl8_02052	sufA	TRUE	FALSE
ecl8_02055	sufD	TRUE	FALSE
ecl8_02063	hpd	TRUE	FALSE
ecl8_02064	melA_1	TRUE	FALSE
ecl8_02065	dgoT_2	TRUE	FALSE
ecl8_02066	aroE_2	TRUE	FALSE
ecl8_02068	modA_1	TRUE	FALSE
ecl8_02069	ecl8_02069	TRUE	FALSE
ecl8_02070	ecl8_02070	TRUE	FALSE
ecl8_02071	ecl8_02071	TRUE	FALSE
ecl8_02072	yiaJ	TRUE	FALSE
ecl8_02073	mhpA	TRUE	FALSE
ecl8_02074	mhpB	TRUE	FALSE
ecl8_02075	mhpC	TRUE	FALSE
ecl8_02076	mhpD	TRUE	FALSE
ecl8_02077	mhpF	TRUE	FALSE
ecl8_02078	mhpE_1	TRUE	FALSE
ecl8_02079	mhpE_2	TRUE	FALSE
ecl8_02080	mhpT_1	TRUE	FALSE
ecl8_02081	mhpT_2	TRUE	FALSE
ecl8_02082	ecl8_02082	TRUE	FALSE
ecl8_02083	ecl8_02083	TRUE	FALSE
ecl8_02084	ecl8_02084	TRUE	FALSE
ecl8_02085	glpE_2	TRUE	FALSE
ecl8_02086	ecl8_02086	TRUE	FALSE
ecl8_02087	gltC_2	TRUE	TRUE	1
ecl8_02088	msuD_2	TRUE	FALSE
ecl8_02089	ydbM	TRUE	FALSE
ecl8_02090	ssuA_2	TRUE	FALSE
ecl8_02092	ssuC_1	TRUE	FALSE
ecl8_02093	ssuB_1	TRUE	FALSE
ecl8_02095	yusV	TRUE	FALSE
ecl8_02096	yfiZ	TRUE	FALSE
ecl8_02097	feuC_1	TRUE	FALSE
ecl8_02098	yhfQ	TRUE	FALSE
ecl8_02099	ybbH	TRUE	FALSE
ecl8_02102	glnQ_2	TRUE	FALSE
ecl8_02104	ecl8_02104	TRUE	FALSE
ecl8_02107	ycaD_1	TRUE	FALSE
ecl8_02108	hipO_1	TRUE	FALSE
ecl8_02109	fdhF_1	TRUE	FALSE
ecl8_02114	ecl8_02114	TRUE	FALSE
ecl8_02115	ecl8_02115	TRUE	FALSE
ecl8_02117	ecl8_02117	TRUE	FALSE
ecl8_02118	ccmA	TRUE	FALSE
ecl8_02119	ccmB_1	TRUE	FALSE
ecl8_02122	ccmD	TRUE	FALSE
ecl8_02123	ccmE	TRUE	FALSE
ecl8_02124	ecl8_02124	TRUE	FALSE
ecl8_02125	ccmF	TRUE	FALSE
ecl8_02126	dsbE	TRUE	FALSE
ecl8_02127	ccmH_1	TRUE	FALSE
ecl8_02128	ccmH_2	TRUE	FALSE
ecl8_02134	ecl8_02134	TRUE	TRUE	1
ecl8_02140	budB	TRUE	FALSE
ecl8_02144	ecl8_02144	TRUE	FALSE
ecl8_02145	hbd	TRUE	FALSE
ecl8_02146	thlA_2	TRUE	FALSE
ecl8_02147	scoB	TRUE	FALSE
ecl8_02148	scoA	TRUE	FALSE
ecl8_02153	ecl8_02153	TRUE	FALSE
ecl8_02154	ecl8_02154	TRUE	FALSE
ecl8_02155	rfnT	TRUE	FALSE
ecl8_02157	srpC	TRUE	FALSE
ecl8_02158	ecl8_02158	TRUE	FALSE
ecl8_02159	ribX_1	TRUE	FALSE
ecl8_02160	cmpC_2	TRUE	FALSE
ecl8_02161	ecl8_02161	TRUE	FALSE
ecl8_02162	ecl8_02162	TRUE	FALSE
ecl8_02163	amnD	TRUE	FALSE
ecl8_02164	codAch2	TRUE	FALSE
ecl8_02166	cynR_5	TRUE	FALSE
ecl8_02168	ecl8_02168	TRUE	FALSE
ecl8_02169	ecl8_02169	TRUE	FALSE
ecl8_02170	ecl8_02170	TRUE	FALSE
ecl8_02171	glpR_2	TRUE	FALSE
ecl8_02172	dgdA	TRUE	FALSE
ecl8_02181	oppF_4	TRUE	FALSE
ecl8_02182	ddpD	TRUE	FALSE
ecl8_02183	gsiD_1	TRUE	FALSE
ecl8_02184	gsiC_2	TRUE	FALSE
ecl8_02186	cat3	TRUE	FALSE
ecl8_02187	ecl8_02187	TRUE	FALSE
ecl8_02190	cynT	TRUE	FALSE
ecl8_02196	ecl8_02196	TRUE	FALSE
ecl8_02197	gcvA_3	TRUE	FALSE
ecl8_02198	rclR_3	TRUE	FALSE
ecl8_02204	asr	TRUE	FALSE
ecl8_02208	ydhC	TRUE	FALSE
ecl8_02209	yahB	TRUE	FALSE
ecl8_02217	rnt	TRUE	FALSE
ecl8_02218	gloA	TRUE	FALSE
ecl8_02221	ecl8_02221	TRUE	FALSE
ecl8_02222	ydhF	TRUE	FALSE
ecl8_02223	sodC	TRUE	TRUE	1
ecl8_02224	aaeB_3	TRUE	FALSE
ecl8_02230	anmK	TRUE	FALSE
ecl8_02231	mliC	TRUE	FALSE
ecl8_02242	rsxC	TRUE	FALSE
ecl8_02257	quiA	TRUE	FALSE
ecl8_02259	pcaG	TRUE	FALSE
ecl8_02260	pcaH	TRUE	FALSE
ecl8_02261	ecl8_02261	TRUE	FALSE
ecl8_02262	pnbA	TRUE	FALSE
ecl8_02266	glgC_2	TRUE	FALSE
ecl8_02272	ydcO	TRUE	FALSE
ecl8_02273	sutR_2	TRUE	FALSE
ecl8_02274	ydcP_2	TRUE	TRUE	1
ecl8_02276	ecl8_02276	TRUE	FALSE
ecl8_02277	ecl8_02277	TRUE	FALSE
ecl8_02283	potA_2	TRUE	FALSE
ecl8_02285	ydcV_1	TRUE	FALSE
ecl8_02291	vdh	TRUE	FALSE
ecl8_02294	ydcZ	TRUE	FALSE
ecl8_02295	mnaT	TRUE	FALSE
ecl8_02296	sutR_3	TRUE	FALSE
ecl8_02297	curA	TRUE	FALSE
ecl8_02298	rihA	TRUE	FALSE
ecl8_02303	ygdR_3	TRUE	FALSE
ecl8_02305	pgrR_4	TRUE	FALSE
ecl8_02306	aroK_2	TRUE	FALSE
ecl8_02310	fliY_2	TRUE	FALSE
ecl8_02311	ecl8_02311	TRUE	FALSE
ecl8_02314	fliY_3	TRUE	FALSE
ecl8_02315	gstB_2	TRUE	FALSE
ecl8_02317	ecl8_02317	TRUE	FALSE
ecl8_02318	malK_1	TRUE	FALSE
ecl8_02319	ecl8_02319	TRUE	FALSE
ecl8_02320	cysW_3	TRUE	FALSE
ecl8_02321	nhoA	TRUE	FALSE
ecl8_02322	narV	TRUE	FALSE
ecl8_02323	narW	TRUE	FALSE
ecl8_02325	narZ	TRUE	FALSE
ecl8_02328	smvA_1	TRUE	FALSE
ecl8_02330	pcaR_1	TRUE	FALSE
ecl8_02332	catC	TRUE	FALSE
ecl8_02337	lvr	TRUE	FALSE
ecl8_02338	yddG	TRUE	FALSE
ecl8_02340	fdnG_2	TRUE	FALSE
ecl8_02344	ecl8_02344	TRUE	FALSE
ecl8_02345	araJ	TRUE	FALSE
ecl8_02346	ecl8_02346	TRUE	FALSE
ecl8_02347	luxA	TRUE	FALSE
ecl8_02348	gsiA_1	TRUE	FALSE
ecl8_02349	ddpC_3	TRUE	FALSE
ecl8_02350	gsiC_3	TRUE	FALSE
ecl8_02351	gsiB_1	TRUE	FALSE
ecl8_02359	sra	TRUE	FALSE
ecl8_02360	ecl8_02360	TRUE	FALSE
ecl8_02361	dmlR_10	TRUE	FALSE
ecl8_02362	ecl8_02362	TRUE	FALSE
ecl8_02366	ecl8_02366	TRUE	FALSE
ecl8_02371	ecl8_02371	TRUE	TRUE	1
ecl8_02373	ecl8_02373	TRUE	FALSE
ecl8_02375	ecl8_02375	TRUE	FALSE
ecl8_02380	oxyR_3	TRUE	FALSE
ecl8_02382	ydjE	TRUE	FALSE
ecl8_02384	zapE_2	TRUE	FALSE
ecl8_02388	ipuF	TRUE	FALSE
ecl8_02389	ptrA_2	TRUE	FALSE
ecl8_02391	pqqCD	TRUE	FALSE
ecl8_02394	ecl8_02394	TRUE	FALSE
ecl8_02395	ecl8_02395	TRUE	FALSE
ecl8_02396	ompR_2	TRUE	FALSE
ecl8_02397	envZ_2	TRUE	FALSE
ecl8_02398	dipZ_1	TRUE	FALSE
ecl8_02399	ecl8_02399	TRUE	FALSE
ecl8_02403	yofA_2	TRUE	FALSE
ecl8_02404	ddc	TRUE	FALSE
ecl8_02410	ecl8_02410	TRUE	FALSE
ecl8_02411	ntdC	TRUE	FALSE
ecl8_02412	iolE_1	TRUE	FALSE
ecl8_02419	guaD_2	TRUE	FALSE
ecl8_02420	pucI	TRUE	FALSE
ecl8_02421	mcbR	TRUE	FALSE
ecl8_02422	hyuA	TRUE	FALSE
ecl8_02430	ecl8_02430	TRUE	TRUE	1
ecl8_02432	fabF_1	TRUE	FALSE
ecl8_02434	emrA_2	TRUE	FALSE
ecl8_02439	atzE	TRUE	FALSE
ecl8_02440	ecl8_02440	TRUE	FALSE
ecl8_02441	hpxW	TRUE	FALSE
ecl8_02442	glvR_3	TRUE	FALSE
ecl8_02447	pucG	TRUE	FALSE
ecl8_02448	amaB_1	TRUE	FALSE
ecl8_02450	ecl8_02450	TRUE	FALSE
ecl8_02451	dmlR_11	TRUE	FALSE
ecl8_02453	namA	TRUE	FALSE
ecl8_02454	ecl8_02454	TRUE	FALSE
ecl8_02455	yjhB_1	TRUE	FALSE
ecl8_02460	oxlT	TRUE	FALSE
ecl8_02462	ulaC_1	TRUE	FALSE
ecl8_02466	alsE	TRUE	TRUE	1
ecl8_02476	argE_1	TRUE	FALSE
ecl8_02477	ecl8_02477	TRUE	FALSE
ecl8_02478	opd	TRUE	FALSE
ecl8_02479	rbsC_2	TRUE	FALSE
ecl8_02480	frcA_2	TRUE	FALSE
ecl8_02492	ecl8_02492	TRUE	TRUE	1
ecl8_02496	ecl8_02496	TRUE	FALSE
ecl8_02499	ykkC	TRUE	FALSE
ecl8_02505	entA_1	TRUE	FALSE
ecl8_02509	carA_1	TRUE	FALSE
ecl8_02510	fabG_6	TRUE	FALSE
ecl8_02511	thlA_3	TRUE	FALSE
ecl8_02512	ttuB_2	TRUE	FALSE
ecl8_02513	ecl8_02513	TRUE	FALSE
ecl8_02517	mmsB_2	TRUE	FALSE
ecl8_02518	cynR_6	TRUE	FALSE
ecl8_02535	fimD_3	TRUE	FALSE
ecl8_02540	pucM	TRUE	FALSE
ecl8_02541	uao	TRUE	FALSE
ecl8_02542	xanP_2	TRUE	FALSE
ecl8_02543	hpxO	TRUE	FALSE
ecl8_02544	cynR_7	TRUE	FALSE
ecl8_02545	ndmA	TRUE	FALSE
ecl8_02546	pobB	TRUE	FALSE
ecl8_02547	nepI_2	TRUE	FALSE
ecl8_02548	rclR_4	TRUE	FALSE
ecl8_02549	ecl8_02549	TRUE	FALSE
ecl8_02552	efe_2	TRUE	FALSE
ecl8_02554	metN_2	TRUE	FALSE
ecl8_02555	metI_2	TRUE	FALSE
ecl8_02556	ecl8_02556	TRUE	FALSE
ecl8_02557	gltR_1	TRUE	FALSE
ecl8_02561	ecl8_02561	TRUE	FALSE
ecl8_02562	tam	TRUE	FALSE
ecl8_02563	ecl8_02563	TRUE	FALSE
ecl8_02571	uxaB	TRUE	FALSE
ecl8_02572	ttr	TRUE	FALSE
ecl8_02575	glsA2	TRUE	FALSE
ecl8_02576	sad_1	TRUE	FALSE
ecl8_02577	gltR_2	TRUE	FALSE
ecl8_02578	ysnE	TRUE	FALSE
ecl8_02579	ldhA_1	TRUE	FALSE
ecl8_02580	glcR_2	TRUE	FALSE
ecl8_02582	dtnK	TRUE	FALSE
ecl8_02583	adh1_2	TRUE	FALSE
ecl8_02586	ecl8_02586	TRUE	FALSE
ecl8_02587	yhcH	TRUE	FALSE
ecl8_02588	fabG_7	TRUE	TRUE	1
ecl8_02589	yddE	TRUE	FALSE
ecl8_02597	ecl8_02597	TRUE	FALSE
ecl8_02598	livF_3	TRUE	FALSE
ecl8_02600	ecl8_02600	TRUE	FALSE
ecl8_02601	ecl8_02601	TRUE	FALSE
ecl8_02602	livH_4	TRUE	FALSE
ecl8_02603	amiC_2	TRUE	FALSE
ecl8_02604	metE_1	TRUE	FALSE
ecl8_02606	cdhR_2	TRUE	FALSE
ecl8_02608	ecl8_02608	TRUE	FALSE
ecl8_02610	lacI_1	TRUE	FALSE
ecl8_02611	lacZ_1	TRUE	FALSE
ecl8_02612	lacZ_2	TRUE	FALSE
ecl8_02615	recF_2	TRUE	FALSE
ecl8_02618	glpR_4	TRUE	FALSE
ecl8_02619	ltnD	TRUE	FALSE
ecl8_02620	otnK	TRUE	FALSE
ecl8_02621	otnC	TRUE	FALSE
ecl8_02625	ecl8_02625	TRUE	TRUE	1
ecl8_02628	ibpA_2	TRUE	FALSE
ecl8_02639	por_2	TRUE	FALSE
ecl8_02640	lgoT	TRUE	FALSE
ecl8_02644	ecl8_02644	TRUE	FALSE
ecl8_02645	ynfD	TRUE	FALSE
ecl8_02646	ynfE	TRUE	FALSE
ecl8_02647	dmsB_1	TRUE	FALSE
ecl8_02648	dmsC_1	TRUE	TRUE	1
ecl8_02649	dmsD	TRUE	FALSE
ecl8_02650	clcB	TRUE	FALSE
ecl8_02655	ecl8_02655	TRUE	FALSE
ecl8_02656	ypwA	TRUE	FALSE
ecl8_02663	tqsA	TRUE	FALSE
ecl8_02664	madA	TRUE	FALSE
ecl8_02667	madC	TRUE	FALSE
ecl8_02668	madD	TRUE	FALSE
ecl8_02669	ecl8_02669	TRUE	FALSE
ecl8_02670	mdcG	TRUE	FALSE
ecl8_02671	fabD_1	TRUE	FALSE
ecl8_02681	fumB	TRUE	FALSE
ecl8_02682	ecl8_02682	TRUE	FALSE
ecl8_02685	catD	TRUE	TRUE	1
ecl8_02686	pcaB	TRUE	FALSE
ecl8_02687	pcaF	TRUE	FALSE
ecl8_02688	pcaJ	TRUE	FALSE
ecl8_02689	pcaI	TRUE	FALSE
ecl8_02690	pcaR_2	TRUE	FALSE
ecl8_02693	iaaH	TRUE	FALSE
ecl8_02694	abgB	TRUE	FALSE
ecl8_02695	abgT	TRUE	FALSE
ecl8_02697	ogt	TRUE	FALSE
ecl8_02699	uspE	TRUE	FALSE
ecl8_02701	pntB	TRUE	FALSE
ecl8_02702	pntA	TRUE	FALSE
ecl8_02705	folM	TRUE	FALSE
ecl8_02708	ecl8_02708	TRUE	FALSE
ecl8_02710	tus_1	TRUE	FALSE
ecl8_02711	fumC	TRUE	FALSE
ecl8_02712	fumA	TRUE	FALSE
ecl8_02713	manA	TRUE	TRUE	1
ecl8_02714	ydgA	TRUE	FALSE
ecl8_02715	malI	TRUE	FALSE
ecl8_02716	malX	TRUE	FALSE
ecl8_02717	malY	TRUE	FALSE
ecl8_02718	zntB_1	TRUE	FALSE
ecl8_02721	ecl8_02721	TRUE	FALSE
ecl8_02722	ecl8_02722	TRUE	TRUE	1
ecl8_02723	yedF	TRUE	FALSE
ecl8_02726	gap	TRUE	FALSE
ecl8_02727	aldA	TRUE	FALSE
ecl8_02728	ydcF	TRUE	FALSE
ecl8_02729	proP_1	TRUE	FALSE
ecl8_02730	cycA_1	TRUE	FALSE
ecl8_02731	astE_1	TRUE	FALSE
ecl8_02732	astB_1	TRUE	FALSE
ecl8_02733	astD_1	TRUE	FALSE
ecl8_02734	astA_1	TRUE	FALSE
ecl8_02739	slyA_2	TRUE	FALSE
ecl8_02740	ecl8_02740	TRUE	FALSE
ecl8_02741	emrK_2	TRUE	FALSE
ecl8_02742	oprM_3	TRUE	FALSE
ecl8_02744	ecl8_02744	TRUE	FALSE
ecl8_02745	ecl8_02745	TRUE	FALSE
ecl8_02746	azoR_2	TRUE	FALSE
ecl8_02749	paaX	TRUE	FALSE
ecl8_02751	paaJ	TRUE	FALSE
ecl8_02752	paaI	TRUE	FALSE
ecl8_02753	paaH	TRUE	FALSE
ecl8_02755	paaF	TRUE	FALSE
ecl8_02756	paaE	TRUE	FALSE
ecl8_02757	paaD	TRUE	FALSE
ecl8_02758	paaC	TRUE	FALSE
ecl8_02759	paaB	TRUE	FALSE
ecl8_02760	paaA	TRUE	FALSE
ecl8_02762	maoA	TRUE	TRUE	1
ecl8_02763	ecl8_02763	TRUE	FALSE
ecl8_02764	ecl8_02764	TRUE	FALSE
ecl8_02765	argE_2	TRUE	FALSE
ecl8_02766	ecl8_02766	TRUE	FALSE
ecl8_02771	ectD	TRUE	FALSE
ecl8_02773	novR	TRUE	FALSE
ecl8_02774	ecl8_02774	TRUE	FALSE
ecl8_02775	feaB_1	TRUE	FALSE
ecl8_02776	feaR	TRUE	FALSE
ecl8_02777	ecl8_02777	TRUE	FALSE
ecl8_02778	ecl8_02778	TRUE	FALSE
ecl8_02779	ecl8_02779	TRUE	FALSE
ecl8_02781	ldhA_2	TRUE	FALSE
ecl8_02784	nifJ_1	TRUE	FALSE
ecl8_02791	dbpA	TRUE	FALSE
ecl8_02793	glpR_5	TRUE	FALSE
ecl8_02794	ydgJ_2	TRUE	FALSE
ecl8_02798	lrp_1	TRUE	FALSE
ecl8_02800	tyrB_1	TRUE	FALSE
ecl8_02805	ecl8_02805	TRUE	FALSE
ecl8_02806	kstR2	TRUE	FALSE
ecl8_02807	azoB	TRUE	FALSE
ecl8_02808	ytnP	TRUE	FALSE
ecl8_02809	nodD2_2	TRUE	FALSE
ecl8_02810	pgrR_9	TRUE	FALSE
ecl8_02811	ecl8_02811	TRUE	FALSE
ecl8_02814	fabG_8	TRUE	FALSE
ecl8_02815	bdcR	TRUE	FALSE
ecl8_02816	bdcA_1	TRUE	FALSE
ecl8_02817	ecl8_02817	TRUE	FALSE
ecl8_02818	ecl8_02818	TRUE	TRUE	1
ecl8_02819	ecl8_02819	TRUE	FALSE
ecl8_02824	ecl8_02824	TRUE	FALSE
ecl8_02826	ecl8_02826	TRUE	FALSE
ecl8_02832	clpV1	TRUE	FALSE
ecl8_02836	ecl8_02836	TRUE	FALSE
ecl8_02840	ecl8_02840	TRUE	TRUE	1
ecl8_02846	nepI_3	TRUE	FALSE
ecl8_02847	ecl8_02847	TRUE	FALSE
ecl8_02848	pgrR_11	TRUE	FALSE
ecl8_02851	ycjG	TRUE	FALSE
ecl8_02853	ecl8_02853	TRUE	FALSE
ecl8_02854	tyrR	TRUE	FALSE
ecl8_02855	licH_1	TRUE	FALSE
ecl8_02856	dsdC_2	TRUE	FALSE
ecl8_02857	ecl8_02857	TRUE	FALSE
ecl8_02858	ycjX	TRUE	FALSE
ecl8_02859	pspD	TRUE	FALSE
ecl8_02861	pspB_1	TRUE	FALSE
ecl8_02862	pspA	TRUE	FALSE
ecl8_02863	pspF	TRUE	TRUE
ecl8_02864	norB	TRUE	FALSE
ecl8_02866	ureR	TRUE	FALSE
ecl8_02867	ecl8_02867	TRUE	FALSE
ecl8_02868	auaH_1	TRUE	FALSE
ecl8_02869	sapA	TRUE	FALSE
ecl8_02872	sapD	TRUE	FALSE
ecl8_02873	sapF	TRUE	FALSE
ecl8_02875	ves	TRUE	FALSE
ecl8_02880	rnb	TRUE	FALSE
ecl8_02888	pgpB	TRUE	FALSE
ecl8_02898	rluB	TRUE	FALSE
ecl8_02899	gcvA_4	TRUE	FALSE
ecl8_02900	ampR	TRUE	FALSE
ecl8_02903	yciV	TRUE	FALSE
ecl8_02904	trpE	TRUE	TRUE	1
ecl8_02905	trpGD	TRUE	FALSE
ecl8_02906	trpC	TRUE	FALSE
ecl8_02907	trpB	TRUE	FALSE
ecl8_02908	trpA	TRUE	FALSE
ecl8_02909	ecl8_02909	TRUE	FALSE
ecl8_02911	ecl8_02911	TRUE	FALSE
ecl8_02913	fiu	TRUE	FALSE
ecl8_02920	ecl8_02920	TRUE	FALSE
ecl8_02926	cedA	TRUE	FALSE
ecl8_02927	katE	TRUE	FALSE
ecl8_02939	astB_2	TRUE	FALSE
ecl8_02940	astD_2	TRUE	FALSE
ecl8_02941	astA_2	TRUE	FALSE
ecl8_02943	xthA	TRUE	FALSE
ecl8_02944	ydjZ_1	TRUE	FALSE
ecl8_02946	ecl8_02946	TRUE	FALSE
ecl8_02947	ynjB	TRUE	FALSE
ecl8_02948	ynjC_1	TRUE	FALSE
ecl8_02949	ynjC_2	TRUE	FALSE
ecl8_02950	fbpC2	TRUE	FALSE
ecl8_02951	ynjE	TRUE	FALSE
ecl8_02952	ynjF	TRUE	FALSE
ecl8_02953	nudG	TRUE	FALSE
ecl8_02954	gdhA_2	TRUE	FALSE
ecl8_02955	ppsC_2	TRUE	FALSE
ecl8_02956	topB	TRUE	FALSE
ecl8_02957	selD	TRUE	FALSE
ecl8_02964	ecl8_02964	TRUE	FALSE
ecl8_02965	ecl8_02965	TRUE	FALSE
ecl8_02974	gpx1	TRUE	FALSE
ecl8_02976	dmlR_13	TRUE	FALSE
ecl8_02977	sotB_2	TRUE	FALSE
ecl8_02978	butA	TRUE	FALSE
ecl8_02981	umuD	TRUE	FALSE
ecl8_02987	nimT	TRUE	FALSE
ecl8_02988	pyrG_2	TRUE	FALSE
ecl8_02989	ecl8_02989	TRUE	FALSE
ecl8_02993	yoaK	TRUE	FALSE
ecl8_02999	ecl8_02999	TRUE	FALSE
ecl8_03002	shdC	TRUE	FALSE
ecl8_03009	cydA_1	TRUE	FALSE
ecl8_03012	yciF	TRUE	FALSE
ecl8_03015	ecl8_03015	TRUE	FALSE
ecl8_03016	yqjZ	TRUE	FALSE
ecl8_03027	nudJ	TRUE	FALSE
ecl8_03029	hflD	TRUE	TRUE
ecl8_03032	virF	TRUE	FALSE
ecl8_03035	roxA_1	TRUE	FALSE
ecl8_03037	potA_3	TRUE	FALSE
ecl8_03038	potB_1	TRUE	FALSE
ecl8_03039	ydcV_2	TRUE	FALSE
ecl8_03041	ymfA	TRUE	TRUE	1
ecl8_03043	gabD_1	TRUE	FALSE
ecl8_03044	dmdB_1	TRUE	FALSE
ecl8_03045	dmdB_2	TRUE	FALSE
ecl8_03046	tktA_2	TRUE	FALSE
ecl8_03047	talB_1	TRUE	FALSE
ecl8_03049	srlB_2	TRUE	FALSE
ecl8_03052	pdxA2_2	TRUE	FALSE
ecl8_03053	eryH	TRUE	FALSE
ecl8_03054	sorC_1	TRUE	FALSE
ecl8_03056	cobB	TRUE	FALSE
ecl8_03057	nagK	TRUE	FALSE
ecl8_03061	mfd	TRUE	FALSE
ecl8_03062	ycfS	TRUE	FALSE
ecl8_03065	iutA_1	TRUE	FALSE
ecl8_03066	ecl8_03066	TRUE	FALSE
ecl8_03067	ndh	TRUE	FALSE
ecl8_03068	ecl8_03068	TRUE	FALSE
ecl8_03069	nagZ	TRUE	FALSE
ecl8_03070	thiK	TRUE	FALSE
ecl8_03071	lpoB	TRUE	FALSE
ecl8_03073	hinT	TRUE	FALSE
ecl8_03078	mltG	TRUE	TRUE	1
ecl8_03086	rpmF	TRUE	FALSE
ecl8_03094	yceM	TRUE	FALSE
ecl8_03095	ecl8_03095	TRUE	FALSE
ecl8_03103	yceO	TRUE	FALSE
ecl8_03106	yjhB_2	TRUE	FALSE
ecl8_03112	betI_2	TRUE	FALSE
ecl8_03125	dsbA_1	TRUE	FALSE
ecl8_03128	efeO	TRUE	FALSE
ecl8_03136	rutA	TRUE	FALSE
ecl8_03138	rutC_2	TRUE	FALSE
ecl8_03139	rutD	TRUE	FALSE
ecl8_03140	rutE	TRUE	FALSE
ecl8_03141	rutF	TRUE	FALSE
ecl8_03142	rutG	TRUE	FALSE
ecl8_03143	ecl8_03143	TRUE	FALSE
ecl8_03150	ecl8_03150	TRUE	FALSE
ecl8_03154	puuD	TRUE	FALSE
ecl8_03158	dmlR_16	TRUE	FALSE
ecl8_03161	yeaW	TRUE	FALSE
ecl8_03162	gabD_2	TRUE	FALSE
ecl8_03164	ecl8_03164	TRUE	FALSE
ecl8_03172	rep_1	TRUE	FALSE
ecl8_03173	ecl8_03173	TRUE	TRUE
ecl8_03181	rlmI	TRUE	FALSE
ecl8_03185	helD	TRUE	FALSE
ecl8_03197	uup	TRUE	FALSE
ecl8_03204	ssuD	TRUE	FALSE
ecl8_03206	ssuB_3	TRUE	FALSE
ecl8_03224	cmoM	TRUE	TRUE
ecl8_03225	ecl8_03225	TRUE	FALSE
ecl8_03232	comEC	TRUE	TRUE
ecl8_03244	dmsC_2	TRUE	FALSE
ecl8_03245	dmsB_2	TRUE	FALSE
ecl8_03246	dmsA_1	TRUE	TRUE	1
ecl8_03248	rarA	TRUE	FALSE
ecl8_03267	ecl8_03267	TRUE	FALSE
ecl8_03272	amiD	TRUE	FALSE
ecl8_03282	walR	TRUE	FALSE
ecl8_03284	ybjO	TRUE	FALSE
ecl8_03290	rimK	TRUE	FALSE
ecl8_03297	ecl8_03297	TRUE	FALSE
ecl8_03323	ecl8_03323	TRUE	TRUE	1
ecl8_03336	ecl8_03336	TRUE	FALSE
ecl8_03356	iaaA	TRUE	FALSE
ecl8_03357	moeA	TRUE	FALSE
ecl8_03358	moeB	TRUE	FALSE
ecl8_03362	ybiU	TRUE	FALSE
ecl8_03363	cytR_2	TRUE	FALSE
ecl8_03364	exuT_4	TRUE	FALSE
ecl8_03367	ybiT	TRUE	FALSE
ecl8_03382	ybiO	TRUE	FALSE
ecl8_03396	cecR	TRUE	FALSE
ecl8_03402	ecl8_03402	TRUE	FALSE
ecl8_03403	clsB	TRUE	FALSE
ecl8_03406	moaE	TRUE	FALSE
ecl8_03411	ybhK	TRUE	FALSE
ecl8_03419	bioC	TRUE	FALSE
ecl8_03420	bioF	TRUE	FALSE
ecl8_03428	hutG	TRUE	FALSE
ecl8_03429	hutI	TRUE	FALSE
ecl8_03446	ybhA	TRUE	FALSE
ecl8_03448	modB_1	TRUE	FALSE
ecl8_03456	galK	TRUE	FALSE
ecl8_03457	galM	TRUE	FALSE
ecl8_03458	gpmA	TRUE	FALSE
ecl8_03459	aroG	TRUE	FALSE
ecl8_03461	zitB	TRUE	FALSE
ecl8_03463	nadA	TRUE	FALSE
ecl8_03473	tolB	TRUE	FALSE
ecl8_03474	tolA_2	TRUE	TRUE	1
ecl8_03475	tolR	TRUE	FALSE
ecl8_03492	pcp	TRUE	TRUE	1
ecl8_03494	ecl8_03494	TRUE	FALSE
ecl8_03495	ecl8_03495	TRUE	FALSE
ecl8_03498	ybgI	TRUE	FALSE
ecl8_03506	kdpE	TRUE	FALSE
ecl8_03510	ybfF	TRUE	FALSE
ecl8_03511	ybfE	TRUE	FALSE
ecl8_03534	ybeZ	TRUE	FALSE
ecl8_03550	rsfS	TRUE	FALSE
ecl8_03551	rlmH	TRUE	FALSE
ecl8_03567	rnk	TRUE	FALSE
ecl8_03580	xylG_2	TRUE	FALSE
ecl8_03582	rbsC_3	TRUE	FALSE
ecl8_03583	ydjH	TRUE	FALSE
ecl8_03585	lyx	TRUE	FALSE
ecl8_03589	codA_2	TRUE	FALSE
ecl8_03590	rbsR_2	TRUE	FALSE
ecl8_03591	suhB_2	TRUE	FALSE
ecl8_03593	agp_2	TRUE	FALSE
ecl8_03605	cstA	TRUE	FALSE
ecl8_03606	entH	TRUE	FALSE
ecl8_03607	entA_2	TRUE	FALSE
ecl8_03608	entB	TRUE	FALSE
ecl8_03609	entE	TRUE	FALSE
ecl8_03610	entC	TRUE	FALSE
ecl8_03612	entS	TRUE	FALSE
ecl8_03614	fepG	TRUE	FALSE
ecl8_03615	fepC_2	TRUE	FALSE
ecl8_03616	entF	TRUE	FALSE
ecl8_03620	entD	TRUE	FALSE
ecl8_03623	sorC_2	TRUE	FALSE
ecl8_03628	rbsC_5	TRUE	TRUE	1
ecl8_03631	yibF_2	TRUE	FALSE
ecl8_03637	betB_1	TRUE	FALSE
ecl8_03639	ecl8_03639	TRUE	FALSE
ecl8_03642	ddpC_4	TRUE	FALSE
ecl8_03644	ddpF	TRUE	FALSE
ecl8_03648	tpa	TRUE	FALSE
ecl8_03649	isfD	TRUE	FALSE
ecl8_03656	ecl8_03656	TRUE	FALSE
ecl8_03658	oppD_4	TRUE	FALSE
ecl8_03665	bepG	TRUE	FALSE
ecl8_03666	mdtA_2	TRUE	FALSE
ecl8_03688	afr	TRUE	FALSE
ecl8_03699	higA	TRUE	TRUE
ecl8_03702	ecl8_03702	TRUE	FALSE
ecl8_03707	moaF	TRUE	FALSE
ecl8_03722	scrB	TRUE	FALSE
ecl8_03724	ecl8_03724	TRUE	FALSE
ecl8_03727	thpA_2	TRUE	FALSE
ecl8_03728	rbsB_3	TRUE	FALSE
ecl8_03729	iolG_1	TRUE	FALSE
ecl8_03730	iolU_2	TRUE	FALSE
ecl8_03735	dtpC	TRUE	FALSE
ecl8_03824	traR	TRUE	FALSE
ecl8_03846	cueR	TRUE	FALSE
ecl8_03849	ybaK	TRUE	FALSE
ecl8_03836	ecl8_03836	TRUE	FALSE
ecl8_03873	gabR_3	TRUE	FALSE
ecl8_03889	ecl8_03889	TRUE	FALSE
ecl8_03898	glnK	TRUE	FALSE
ecl8_03902	sbnA	TRUE	FALSE
ecl8_03925	kstD	TRUE	FALSE
ecl8_03937	xseB	TRUE	FALSE
ecl8_03950	ecl8_03950	TRUE	FALSE
ecl8_03982	proC	TRUE	FALSE
ecl8_03995	hemB_1	TRUE	FALSE
ecl8_04013	glnQ_7	TRUE	FALSE
ecl8_04016	ecpE	TRUE	FALSE
ecl8_04025	phnE_2	TRUE	FALSE
ecl8_04057	csiD	TRUE	FALSE
ecl8_04059	gabD_3	TRUE	FALSE
ecl8_04079	gmhA	TRUE	TRUE	1
ecl8_04093	dmlR_17	TRUE	FALSE
ecl8_04119	rnhB	TRUE	FALSE
ecl8_04141	mtnN	TRUE	FALSE
ecl8_04159	gspH	TRUE	FALSE
ecl8_04161	xcpW	TRUE	FALSE
ecl8_04194	ecl8_04194	TRUE	FALSE
ecl8_04196	aceF	TRUE	FALSE
ecl8_04230	mraZ	TRUE	TRUE	1
ecl8_04283	oadG	TRUE	FALSE
ecl8_04316	arcA	TRUE	FALSE
ecl8_04344	holD	TRUE	FALSE
ecl8_04381	ecl8_04381	TRUE	TRUE	1
ecl8_04390	hpcD	TRUE	FALSE
ecl8_04398	ecl8_04398	TRUE	TRUE	1
ecl8_04416	ecl8_04416	TRUE	FALSE
ecl8_04437	ecl8_04437	TRUE	FALSE
ecl8_04522	holC	TRUE	TRUE
ecl8_04560	ecl8_04560	TRUE	FALSE
ecl8_04621	miaA	TRUE	FALSE
ecl8_04645	efp	TRUE	FALSE
ecl8_04651	ecl8_04651	TRUE	TRUE	1
ecl8_04654	cvaA	TRUE	TRUE	1
ecl8_04859	ecl8_04859	TRUE	TRUE
ecl8_04879	xerC_3	TRUE	FALSE
ecl8_04958	rpmE	TRUE	FALSE
ecl8_04996	ecl8_04996	TRUE	FALSE
ecl8_05019	polA	TRUE	TRUE	1
ecl8_05044	mnmG	TRUE	TRUE	1
ecl8_05049	atpF	TRUE	FALSE
ecl8_05051	atpA	TRUE	FALSE
ecl8_05054	atpC	TRUE	FALSE

## Sheet: Curated ECL8 (E) Gene List
locus_tag	ECL8 gene_name	Chromsome (c)/plasmid (p)
ecl8_00001	dnaA	c
ecl8_00002	dnaN	c
ecl8_00004	gyrB	c
ecl8_00113	spoT	c
ecl8_00115	gmk	c
ecl8_00122	ecl8_00122	c
ecl8_00130	dut	c
ecl8_00131	coaBC	c
ecl8_00133	rpmB	c
ecl8_00134	rpmG	c
ecl8_00136	coaD	c
ecl8_00138	waaA	c
ecl8_00147	rfaC	c
ecl8_00148	rfaF	c
ecl8_00149	hldD	c
ecl8_00160	cysE	c
ecl8_00189	glyQ	c
ecl8_00190	glyS	c
ecl8_00284	tusA	c
ecl8_00290	ftsY	c
ecl8_00293	rpoH	c
ecl8_00318	asd_1	c
ecl8_00386	tusD	c
ecl8_00387	tusC	c
ecl8_00388	tusB	c
ecl8_00389	rpsL	c
ecl8_00390	rpsG	c
ecl8_00391	fusA_1	c
ecl8_00396	rpsJ	c
ecl8_00397	rplC	c
ecl8_00398	rplD	c
ecl8_00399	rplW	c
ecl8_00400	rplB	c
ecl8_00401	rpsS	c
ecl8_00402	rplV	c
ecl8_00403	rpsC	c
ecl8_00404	rplP	c
ecl8_00405	rpmC	c
ecl8_00406	rpsQ	c
ecl8_00407	rplN	c
ecl8_00408	rplX	c
ecl8_00409	rplE	c
ecl8_00410	rpsN	c
ecl8_00411	rpsH	c
ecl8_00412	rplF	c
ecl8_00413	rplR	c
ecl8_00414	rpsE	c
ecl8_00415	rpmD	c
ecl8_00416	rplO	c
ecl8_00417	secY	c
ecl8_00418	rpsM	c
ecl8_00419	rpsD	c
ecl8_00420	rpoA	c
ecl8_00421	rplQ	c
ecl8_00429	fmt	c
ecl8_00434	tsaC	c
ecl8_00452	accC_1	c
ecl8_00453	accB_1	c
ecl8_00454	aroQ	c
ecl8_00458	mreB	c
ecl8_00459	mreC	c
ecl8_00460	mreD	c
ecl8_00478	rplM	c
ecl8_00479	rpsI	c
ecl8_00497	lptB_2	c
ecl8_00498	lptA	c
ecl8_00499	lptC	c
ecl8_00509	murA	c
ecl8_00511	ispB	c
ecl8_00512	rplU	c
ecl8_00513	rpmA	c
ecl8_00515	obgE	c
ecl8_00520	ftsH_1	c
ecl8_00521	folP	c
ecl8_00522	glmM	c
ecl8_00531	nusA	c
ecl8_00532	infB	c
ecl8_00535	rpsO	c
ecl8_00631	rpoD	c
ecl8_00632	dnaG	c
ecl8_00634	tsaD	c
ecl8_00644	folB	c
ecl8_00646	cca	c
ecl8_00650	hldE	c
ecl8_00653	ribB	c
ecl8_00663	parE	c
ecl8_00670	parC	c
ecl8_00671	plsC	c
ecl8_00728	yqgF	c
ecl8_00735	metK	c
ecl8_00739	tktA_1	c
ecl8_00741	pgk	c
ecl8_00742	fbaA_1	c
ecl8_00747	rpiA	c
ecl8_00753	ubiH	c
ecl8_00767	ygfZ	c
ecl8_00774	prfB	c
ecl8_00775	lysS	c
ecl8_00891	lgt	c
ecl8_00892	thyA	c
ecl8_00897	recC	c
ecl8_00937	cbiH	c
ecl8_00994	pyrG_1	c
ecl8_00995	eno	c
ecl8_01008	ftsB	c
ecl8_01009	ispD	c
ecl8_01010	ispF	c
ecl8_01029	ecl8_01029	c
ecl8_01033	ecl8_01033	c
ecl8_01036	ecl8_01036	c
ecl8_01100	alaS	c
ecl8_01101	csrA	c
ecl8_01168	ecl8_01168	c
ecl8_01169	ecl8_01169	c
ecl8_01178	nadK	c
ecl8_01179	grpE	c
ecl8_01182	ffh	c
ecl8_01183	rpsP	c
ecl8_01184	rimM	c
ecl8_01185	trmD	c
ecl8_01186	rplS	c
ecl8_01188	ecl8_01188	c
ecl8_01197	bamD	c
ecl8_01207	pssA	c
ecl8_01222	lepB	c
ecl8_01223	rnc	c
ecl8_01224	era	c
ecl8_01226	pdxJ	c
ecl8_01227	acpS	c
ecl8_01231	tadA	c
ecl8_01239	glyA1	c
ecl8_01251	suhB_1	c
ecl8_01254	iscS	c
ecl8_01255	iscU	c
ecl8_01258	hscA	c
ecl8_01271	ispG	c
ecl8_01272	hisS	c
ecl8_01275	der	c
ecl8_01295	hda	c
ecl8_01302	dapA_1	c
ecl8_01309	dapE	c
ecl8_01355	zipA	c
ecl8_01356	ligA	c
ecl8_01364	gltX	c
ecl8_01395	lexA_1	c
ecl8_01454	fabB	c
ecl8_01458	usg	c
ecl8_01461	accD	c
ecl8_01462	folC	c
ecl8_01466	ubiX	c
ecl8_01471	hisP	c
ecl8_01472	ecl8_01472	c
ecl8_01524	nrdB	c
ecl8_01525	nrdA	c
ecl8_01526	ubiG	c
ecl8_01527	gyrA	c
ecl8_01548	yejM	c
ecl8_01549	ecl8_01549	c
ecl8_01555	rplY	c
ecl8_01584	folE	c
ecl8_01614	metG	c
ecl8_01627	araB_1	c
ecl8_01630	lsrR_2	c
ecl8_01652	ecl8_01652	c
ecl8_01735	ecl8_01735	c
ecl8_01782	pgsA	c
ecl8_01804	argS	c
ecl8_01812	aspS	c
ecl8_01815	ruvC	c
ecl8_01816	ruvA	c
ecl8_01817	ruvB	c
ecl8_01862	pdeD	c
ecl8_01869	tsaB	c
ecl8_01873	minE	c
ecl8_01886	cvrA	c
ecl8_01924	safA	c
ecl8_01925	ecl8_01925	c
ecl8_01926	ecl8_01926	c
ecl8_01936	pth	c
ecl8_01940	prs	c
ecl8_01941	ispE	c
ecl8_01942	lolB	c
ecl8_01943	hemA	c
ecl8_01944	prfA	c
ecl8_01948	kdsA	c
ecl8_01957	cmpC_1	c
ecl8_01958	nasD_2	c
ecl8_01998	ecl8_01998	c
ecl8_02009	thrS_1	c
ecl8_02010	infC	c
ecl8_02011	rpmI	c
ecl8_02012	rplT	c
ecl8_02013	pheS	c
ecl8_02014	pheT	c
ecl8_02087	gltC_2	c
ecl8_02120	ccmB_2	c
ecl8_02130	ecl8_02130	c
ecl8_02133	ecl8_02133	c
ecl8_02134	ecl8_02134	c
ecl8_02206	ribC	c
ecl8_02223	sodC	c
ecl8_02232	pdxH	c
ecl8_02233	tyrS	c
ecl8_02274	ydcP_2	c
ecl8_02369	ecl8_02369	c
ecl8_02371	ecl8_02371	c
ecl8_02430	ecl8_02430	c
ecl8_02463	ulaB_1	c
ecl8_02466	alsE	c
ecl8_02467	mngA	c
ecl8_02492	ecl8_02492	c
ecl8_02539	hipB	c
ecl8_02566	ecl8_02566	c
ecl8_02567	ecl8_02567	c
ecl8_02568	ecl8_02568	c
ecl8_02588	fabG_7	c
ecl8_02625	ecl8_02625	c
ecl8_02630	nreC	c
ecl8_02631	ecl8_02631	c
ecl8_02648	dmsC_1	c
ecl8_02685	catD	c
ecl8_02713	manA	c
ecl8_02722	ecl8_02722	c
ecl8_02762	maoA	c
ecl8_02818	ecl8_02818	c
ecl8_02840	ecl8_02840	c
ecl8_02849	ecl8_02849	c
ecl8_02876	fabI	c
ecl8_02877	ecl8_02877	c
ecl8_02886	lapB_2	c
ecl8_02887	lapA	c
ecl8_02889	ribA	c
ecl8_02892	cysB	c
ecl8_02893	topA_2	c
ecl8_02904	trpE	c
ecl8_02935	nadE	c
ecl8_02967	gapA	c
ecl8_03013	ecl8_03013	c
ecl8_03021	dgcC	c
ecl8_03025	icd_2	c
ecl8_03028	mnmA	c
ecl8_03030	purB	c
ecl8_03041	ymfA	c
ecl8_03058	lolE	c
ecl8_03059	lolD	c
ecl8_03060	lolC	c
ecl8_03076	holB	c
ecl8_03077	tmk	c
ecl8_03078	mltG	c
ecl8_03081	acpP	c
ecl8_03082	fabG_10	c
ecl8_03083	fabD_2	c
ecl8_03084	fabH	c
ecl8_03090	rne	c
ecl8_03093	murJ	c
ecl8_03170	tusE	c
ecl8_03174	ecl8_03174	c
ecl8_03193	fabA	c
ecl8_03214	asnS	c
ecl8_03221	mukB	c
ecl8_03222	mukE	c
ecl8_03223	mukF	c
ecl8_03227	kdsB	c
ecl8_03228	ecl8_03228	c
ecl8_03230	lpxK	c
ecl8_03231	msbA_1	c
ecl8_03234	rpsA	c
ecl8_03235	cmk	c
ecl8_03246	dmsA_1	c
ecl8_03247	serS	c
ecl8_03249	lolA	c
ecl8_03250	ftsK	c
ecl8_03256	infA	c
ecl8_03323	ecl8_03323	c
ecl8_03332	ecl8_03332	c
ecl8_03334	ecl8_03334	c
ecl8_03474	tolA_2	c
ecl8_03492	pcp	c
ecl8_03512	fldA	c
ecl8_03518	glnS	c
ecl8_03532	ubiF	c
ecl8_03535	ybeY	c
ecl8_03537	lnt	c
ecl8_03545	leuS	c
ecl8_03546	lptE	c
ecl8_03547	holA	c
ecl8_03548	nadD	c
ecl8_03552	mrdA_2	c
ecl8_03553	mrdB	c
ecl8_03556	ecl8_03556	c
ecl8_03557	lipB	c
ecl8_03559	lipA	c
ecl8_03628	rbsC_5	c
ecl8_03763	ecl8_03763	c
ecl8_03807	ecl8_03807	c
ecl8_03810	ecl8_03810	c
ecl8_03815	ecl8_03815	c
ecl8_03827	folD	c
ecl8_03829	cysS_1	c
ecl8_03830	ppiB	c
ecl8_03831	lpxH	c
ecl8_03854	hemH	c
ecl8_03855	adk	c
ecl8_03859	dnaX	c
ecl8_03938	ispA	c
ecl8_03939	dxs_3	c
ecl8_03942	thiL_1	c
ecl8_03943	nusB	c
ecl8_03944	ribE	c
ecl8_03945	ribD	c
ecl8_03951	secF	c
ecl8_03952	secD	c
ecl8_03953	yajC	c
ecl8_04021	ecpR	c
ecl8_04079	gmhA	c
ecl8_04085	dnaQ	c
ecl8_04086	rnhA	c
ecl8_04107	proS_1	c
ecl8_04114	tilS	c
ecl8_04117	accA	c
ecl8_04118	dnaE	c
ecl8_04120	lpxB	c
ecl8_04121	lpxA	c
ecl8_04122	fabZ	c
ecl8_04123	lpxD	c
ecl8_04125	bamA_1	c
ecl8_04126	rseP	c
ecl8_04127	cdsA	c
ecl8_04128	uppS	c
ecl8_04129	dxr	c
ecl8_04130	frr	c
ecl8_04131	pyrH	c
ecl8_04132	tsf	c
ecl8_04133	rpsB	c
ecl8_04136	dapD	c
ecl8_04144	erpA	c
ecl8_04173	folK	c
ecl8_04191	acnB	c
ecl8_04195	lpdA	c
ecl8_04209	coaE	c
ecl8_04213	secA_2	c
ecl8_04214	secM	c
ecl8_04215	lpxC	c
ecl8_04216	ftsZ	c
ecl8_04217	ftsA_2	c
ecl8_04218	ftsQ	c
ecl8_04220	murC	c
ecl8_04221	murG	c
ecl8_04222	ftsW	c
ecl8_04223	murD	c
ecl8_04224	mraY	c
ecl8_04225	murF	c
ecl8_04226	murE	c
ecl8_04227	ftsI_2	c
ecl8_04228	ftsL	c
ecl8_04229	rsmH	c
ecl8_04230	mraZ	c
ecl8_04264	lptD	c
ecl8_04270	folA	c
ecl8_04276	dapB	c
ecl8_04292	ispH	c
ecl8_04294	lspA_1	c
ecl8_04295	ileS	c
ecl8_04296	ribF	c
ecl8_04297	ecl8_04297	c
ecl8_04360	dnaT	c
ecl8_04361	dnaC	c
ecl8_04381	ecl8_04381	c
ecl8_04398	ecl8_04398	c
ecl8_04519	lptG	c
ecl8_04520	lptF	c
ecl8_04523	valS	c
ecl8_04569	ppa_2	c
ecl8_04594	rpsR	c
ecl8_04595	priB	c
ecl8_04596	rpsF	c
ecl8_04624	tsaE	c
ecl8_04631	orn	c
ecl8_04632	rsgA	c
ecl8_04633	psd	c
ecl8_04651	ecl8_04651	c
ecl8_04654	cvaA	c
ecl8_04658	groL	c
ecl8_04659	groS	c
ecl8_04743	ssb	c
ecl8_04750	dnaB	c
ecl8_04758	lexA_2	c
ecl8_04760	plsB	c
ecl8_04761	ubiA	c
ecl8_04811	hemE	c
ecl8_04824	rpoC	c
ecl8_04825	rpoB	c
ecl8_04826	rplL	c
ecl8_04827	rplJ	c
ecl8_04828	rplA	c
ecl8_04829	rplK	c
ecl8_04830	nusG	c
ecl8_04831	secE	c
ecl8_04837	coaA	c
ecl8_04838	birA_2	c
ecl8_04839	murB	c
ecl8_04845	hemG	c
ecl8_04852	ubiD	c
ecl8_04858	ubiB	c
ecl8_04860	ubiE	c
ecl8_04885	hemC	c
ecl8_04886	hemD	c
ecl8_04906	rho	c
ecl8_04913	rep_2	c
ecl8_04933	murI	c
ecl8_04959	priA	c
ecl8_05018	engB	c
ecl8_05019	polA	c
ecl8_05044	mnmG	c
ecl8_05055	glmU	c
ecl8_05056	glmS_2	c
ecl8_05072	mnmE	c
ecl8_05073	yidC	c
ecl8_05074	ecl8_05074	c
ecl8_05075	repB_1	c
ecl8_05094	ecl8_05094	c
ecl8_05096	ecl8_05096	c
ecl8_05104	rcsA_2	c
ecl8_05105	yedA_2	c
ecl8_05106	ecl8_05106	c
ecl8_05170	ecl8_05170	c
ecl8_05272	ecl8_05272	c

## Sheet: ECL8 CDS Lookup table
locus_tag	gene_name	Product	Chromsome (c)/plasmid (p)
ecl8_00001	dnaA	Chromosomal replication initiator protein DnaA	c
ecl8_00002	dnaN	Beta sliding clamp	c
ecl8_00003	recF_1	DNA replication and repair protein RecF	c
ecl8_00004	gyrB	DNA gyrase subunit B	c
ecl8_00005	yidA	Sugar phosphatase YidA	c
ecl8_00006	ecl8_00006	hypothetical protein	c
ecl8_00007	ecl8_00007	hypothetical protein	c
ecl8_00008	lutR	HTH-type transcriptional regulator LutR	c
ecl8_00009	dgoK1_1	putative 2-dehydro-3-deoxygalactonokinase DgoK1	c
ecl8_00010	dgoA_1	2-dehydro-3-deoxy-6-phosphogalactonate aldolase	c
ecl8_00011	dgoD	D-galactonate dehydratase	c
ecl8_00012	dgoT_1	D-galactonate transporter	c
ecl8_00013	ecl8_00013	hypothetical protein	c
ecl8_00014	ecl8_00014	hypothetical protein	c
ecl8_00015	ibpA_1	Small heat shock protein IbpA	c
ecl8_00016	ibpB	Small heat shock protein IbpB	c
ecl8_00017	ecl8_00017	hypothetical protein	c
ecl8_00018	ecl8_00018	hypothetical protein	c
ecl8_00019	aspT_1	Aspartate/alanine antiporter	c
ecl8_00020	mngR_1	Mannosyl-D-glycerate transport/metabolism system repressor MngR	c
ecl8_00021	malP_1	PTS system maltose-specific EIICB component	c
ecl8_00022	aglB	6-phospho-alpha-glucosidase	c
ecl8_00023	yidH	Inner membrane protein YidH	c
ecl8_00024	yidG	Inner membrane protein YidG	c
ecl8_00025	chuR_1	Anaerobic sulfatase-maturating enzyme	c
ecl8_00026	dsdA	D-serine dehydratase	c
ecl8_00027	dsdX	D-serine transporter DsdX	c
ecl8_00028	dsdC_1	HTH-type transcriptional regulator DsdC	c
ecl8_00029	emrD	Multidrug resistance protein D	c
ecl8_00030	ecl8_00030	hypothetical protein	c
ecl8_00031	ecl8_00031	hypothetical protein	c
ecl8_00032	ecl8_00032	hypothetical protein	c
ecl8_00033	ecl8_00033	hypothetical protein	c
ecl8_00034	ilvB	Acetolactate synthase isozyme 1 large subunit	c
ecl8_00035	ilvN	Acetolactate synthase isozyme 1 small subunit	c
ecl8_00036	uhpA_1	Transcriptional regulatory protein UhpA	c
ecl8_00037	uhpB	Signal transduction histidine-protein kinase/phosphatase UhpB	c
ecl8_00038	uhpC	Membrane sensor protein UhpC	c
ecl8_00039	uhpT	Hexose-6-phosphate:phosphate antiporter	c
ecl8_00040	ecl8_00040	hypothetical protein	c
ecl8_00041	higA-2	Antitoxin HigA-2	c
ecl8_00042	ecl8_00042	hypothetical protein	c
ecl8_00043	nepI_1	Purine ribonucleoside efflux pump NepI	c
ecl8_00044	phnX	Phosphonoacetaldehyde hydrolase	c
ecl8_00045	phnW	2-aminoethylphosphonate--pyruvate transaminase	c
ecl8_00046	phnR	Putative transcriptional regulator of 2-aminoethylphosphonate degradation operons	c
ecl8_00047	phnS	Putative 2-aminoethylphosphonate-binding periplasmic protein	c
ecl8_00048	phnT	Putative 2-aminoethylphosphonate import ATP-binding protein PhnT	c
ecl8_00049	phnU	Putative 2-aminoethylphosphonate transport system permease protein PhnU	c
ecl8_00050	phnV_1	Putative 2-aminoethylphosphonate transport system permease protein PhnV	c
ecl8_00051	lamB_1	Maltoporin	c
ecl8_00052	chbA_1	PTS system N,N'-diacetylchitobiose-specific EIIA component	c
ecl8_00053	licC_1	Lichenan permease IIC component	c
ecl8_00054	celA_1	PTS system cellobiose-specific EIIB component	c
ecl8_00055	ascG_1	HTH-type transcriptional regulator AscG	c
ecl8_00056	pcaK_1	4-hydroxybenzoate transporter PcaK	c
ecl8_00057	galA_1	Gallate dioxygenase	c
ecl8_00058	galA_2	Gallate dioxygenase	c
ecl8_00059	gbpR_1	HTH-type transcriptional regulator GbpR	c
ecl8_00060	galB	4-oxalmesaconate hydratase	c
ecl8_00061	galC	4-carboxy-4-hydroxy-2-oxoadipic acid aldolase	c
ecl8_00062	galD	4-oxalomesaconate tautomerase	c
ecl8_00063	mmsB_1	3-hydroxyisobutyrate dehydrogenase	c
ecl8_00064	ecl8_00064	hypothetical protein	c
ecl8_00065	yicL	putative inner membrane transporter YicL	c
ecl8_00066	murP	PTS system N-acetylmuramic acid-specific EIIBC component	c
ecl8_00067	murQ_1	N-acetylmuramic acid 6-phosphate etherase	c
ecl8_00068	bcr_1	Bicyclomycin resistance protein	c
ecl8_00069	oprM_1	Outer membrane protein OprM	c
ecl8_00070	mexB	Multidrug resistance protein MexB	c
ecl8_00071	mexA	Multidrug resistance protein MexA	c
ecl8_00072	ecl8_00072	Acetyltransferase	c
ecl8_00073	ecl8_00073	hypothetical protein	c
ecl8_00074	luxR	HTH-type transcriptional regulator LuxR	c
ecl8_00075	bmr3	Multidrug resistance protein 3	c
ecl8_00076	dmlR_1	HTH-type transcriptional regulator DmlR	c
ecl8_00077	ecl8_00077	hypothetical protein	c
ecl8_00078	ecl8_00078	hypothetical protein	c
ecl8_00079	ecl8_00079	hypothetical protein	c
ecl8_00080	rclR_1	RCS-specific HTH-type transcriptional activator RclR	c
ecl8_00081	nlpA	Lipoprotein 28	c
ecl8_00082	ecl8_00082	hypothetical protein	c
ecl8_00083	act	Methanol dehydrogenase activator	c
ecl8_00084	ecl8_00084	hypothetical protein	c
ecl8_00085	cdhR_1	HTH-type transcriptional regulator CdhR	c
ecl8_00086	yahK	Aldehyde reductase YahK	c
ecl8_00087	ecl8_00087	hypothetical protein	c
ecl8_00088	ycnE	Putative monooxygenase YcnE	c
ecl8_00089	ecl8_00089	Zinc-type alcohol dehydrogenase-like protein	c
ecl8_00090	ecl8_00090	hypothetical protein	c
ecl8_00091	ecl8_00091	tRNA-Sec	c
ecl8_00092	yicJ_1	Inner membrane symporter YicJ	c
ecl8_00093	yicI	Alpha-xylosidase	c
ecl8_00094	glvR_1	HTH-type transcriptional regulator GlvR	c
ecl8_00095	bglT	6-phospho-beta-glucosidase BglT	c
ecl8_00096	malP_2	PTS system maltose-specific EIICB component	c
ecl8_00097	ecl8_00097	hypothetical protein	c
ecl8_00098	xanP_1	Xanthine permease XanP	c
ecl8_00099	gltS	Sodium/glutamate symporter	c
ecl8_00100	glpK_1	Glycerol kinase	c
ecl8_00101	glpF_1	Glycerol uptake facilitator protein	c
ecl8_00102	zapB	Cell division protein ZapB	c
ecl8_00103	sbp	Sulfate-binding protein	c
ecl8_00104	cdh	CDP-diacylglycerol pyrophosphatase	c
ecl8_00105	ecl8_00105	hypothetical protein	c
ecl8_00106	tpiA	Triosephosphate isomerase	c
ecl8_00107	ecl8_00107	hypothetical protein	c
ecl8_00108	ecl8_00108	hypothetical protein	c
ecl8_00109	fpr	Flavodoxin/ferredoxin--NADP reductase	c
ecl8_00110	glpX	Fructose-1,6-bisphosphatase 1 class 2	c
ecl8_00111	recG	ATP-dependent DNA helicase RecG	c
ecl8_00112	trmH	tRNA (guanosine(18)-2'-O)-methyltransferase	c
ecl8_00113	spoT	Bifunctional (p)ppGpp synthase/hydrolase SpoT	c
ecl8_00114	rpoZ	DNA-directed RNA polymerase subunit omega	c
ecl8_00115	gmk	Guanylate kinase	c
ecl8_00116	ligB	DNA ligase B	c
ecl8_00117	ecl8_00117	hypothetical protein	c
ecl8_00118	clcA_1	H(+)/Cl(-) exchange transporter ClcA	c
ecl8_00119	ada_1	Bifunctional transcriptional activator/DNA repair enzyme Ada	c
ecl8_00120	ecl8_00120	hypothetical protein	c
ecl8_00121	ecl8_00121	hypothetical protein	c
ecl8_00122	ecl8_00122	hypothetical protein	c
ecl8_00123	ecl8_00123	hypothetical protein	c
ecl8_00124	ybhF_1	putative multidrug ABC transporter ATP-binding protein YbhF	c
ecl8_00125	ybhR_1	putative multidrug ABC transporter permease YbhR	c
ecl8_00126	rph	Ribonuclease PH	c
ecl8_00127	pyrE_1	Orotate phosphoribosyltransferase	c
ecl8_00128	gnl	Gluconolactonase	c
ecl8_00129	slmA	Nucleoid occlusion factor SlmA	c
ecl8_00130	dut	Deoxyuridine 5'-triphosphate nucleotidohydrolase	c
ecl8_00131	coaBC	Coenzyme A biosynthesis bifunctional protein CoaBC	c
ecl8_00132	ecl8_00132	hypothetical protein	c
ecl8_00133	rpmB	50S ribosomal protein L28	c
ecl8_00134	rpmG	50S ribosomal protein L33	c
ecl8_00135	mutM	Formamidopyrimidine-DNA glycosylase	c
ecl8_00136	coaD	Phosphopantetheine adenylyltransferase	c
ecl8_00137	ecl8_00137	hypothetical protein	c
ecl8_00138	waaA	3-deoxy-D-manno-octulosonic acid transferase	c
ecl8_00139	epsJ_1	putative glycosyltransferase EpsJ	c
ecl8_00140	pglJ	N-acetylgalactosamine-N, N'-diacetylbacillosaminyl-diphospho-undecaprenol 4-alpha-N-acetylgalactosaminyltransferase	c
ecl8_00141	rfaG	Lipopolysaccharide core biosynthesis protein RfaG	c
ecl8_00142	rfaQ	Lipopolysaccharide core heptosyltransferase RfaQ	c
ecl8_00143	ecl8_00143	hypothetical protein	c
ecl8_00144	epsJ_2	putative glycosyltransferase EpsJ	c
ecl8_00145	rfaL	O-antigen ligase	c
ecl8_00146	ecl8_00146	Glycogen synthase	c
ecl8_00147	rfaC	Lipopolysaccharide heptosyltransferase 1	c
ecl8_00148	rfaF	ADP-heptose--LPS heptosyltransferase 2	c
ecl8_00149	hldD	ADP-L-glycero-D-manno-heptose-6-epimerase	c
ecl8_00150	kbl	2-amino-3-ketobutyrate coenzyme A ligase	c
ecl8_00151	tdh	L-threonine 3-dehydrogenase	c
ecl8_00152	ecl8_00152	hypothetical protein	c
ecl8_00153	ecl8_00153	hypothetical protein	c
ecl8_00154	envC	Murein hydrolase activator EnvC	c
ecl8_00155	gpmI	2,3-bisphosphoglycerate-independent phosphoglycerate mutase	c
ecl8_00156	yibN	putative protein YibN	c
ecl8_00157	grxC	Glutaredoxin 3	c
ecl8_00158	secB	Protein-export protein SecB	c
ecl8_00159	gpsA	Glycerol-3-phosphate dehydrogenase [NAD(P)+]	c
ecl8_00160	cysE	Serine acetyltransferase	c
ecl8_00161	ecl8_00161	hypothetical protein	c
ecl8_00162	ecl8_00162	hypothetical protein	c
ecl8_00163	trmL	tRNA (cytidine(34)-2'-O)-methyltransferase	c
ecl8_00164	lldD_1	L-lactate dehydrogenase	c
ecl8_00165	lldR_1	Putative L-lactate dehydrogenase operon regulatory protein	c
ecl8_00166	lldP	L-lactate permease	c
ecl8_00167	yibL	putative protein YibL	c
ecl8_00168	ecl8_00168	hypothetical protein	c
ecl8_00169	mtlR	Mannitol operon repressor	c
ecl8_00170	mtlD	Mannitol-1-phosphate 5-dehydrogenase	c
ecl8_00171	mtlA	PTS system mannitol-specific EIICBA component	c
ecl8_00172	yibF_1	putative GST-like protein YibF	c
ecl8_00173	selA	L-seryl-tRNA(Sec) selenium transferase	c
ecl8_00174	selB	Selenocysteine-specific elongation factor	c
ecl8_00175	cooF	Iron-sulfur protein	c
ecl8_00176	avtA	Valine--pyruvate aminotransferase	c
ecl8_00177	malS	Periplasmic alpha-amylase	c
ecl8_00178	ecl8_00178	hypothetical protein	c
ecl8_00179	xylR	Xylose operon regulatory protein	c
ecl8_00180	xylH_1	Xylose transport system permease protein XylH	c
ecl8_00181	xylG_1	Xylose import ATP-binding protein XylG	c
ecl8_00182	xylF_1	D-xylose-binding periplasmic protein	c
ecl8_00183	xylA_1	Xylose isomerase	c
ecl8_00184	xylB_1	Xylulose kinase	c
ecl8_00185	yiaB	Inner membrane protein YiaB	c
ecl8_00186	yiaA	Inner membrane protein YiaA	c
ecl8_00187	wecH	O-acetyltransferase WecH	c
ecl8_00188	ecl8_00188	hypothetical protein	c
ecl8_00189	glyQ	Glycine--tRNA ligase alpha subunit	c
ecl8_00190	glyS	Glycine--tRNA ligase beta subunit	c
ecl8_00191	ecl8_00191	hypothetical protein	c
ecl8_00192	ecl8_00192	hypothetical protein	c
ecl8_00193	ecl8_00193	hypothetical protein	c
ecl8_00194	ecl8_00194	hypothetical protein	c
ecl8_00195	ecl8_00195	hypothetical protein	c
ecl8_00196	ecl8_00196	hypothetical protein	c
ecl8_00197	hokA_1	Protein HokA	c
ecl8_00198	yheS_1	putative ABC transporter ATP-binding protein YheS	c
ecl8_00199	cspA	Cold shock protein CspA	c
ecl8_00200	ecl8_00200	hypothetical protein	c
ecl8_00201	pcaK_2	4-hydroxybenzoate transporter PcaK	c
ecl8_00202	ecl8_00202	hypothetical protein	c
ecl8_00203	ghrB	Glyoxylate/hydroxypyruvate reductase B	c
ecl8_00204	ttuB_1	Putative tartrate transporter	c
ecl8_00205	kdgK_1	2-dehydro-3-deoxygluconokinase	c
ecl8_00206	ecl8_00206	hypothetical protein	c
ecl8_00207	kdgR_1	HTH-type transcriptional regulator KdgR	c
ecl8_00208	yiaD	putative lipoprotein YiaD	c
ecl8_00209	bisC	Biotin sulfoxide reductase	c
ecl8_00210	yjaB_1	putative N-acetyltransferase YjaB	c
ecl8_00211	tag	DNA-3-methyladenine glycosylase 1	c
ecl8_00212	ecl8_00212	hypothetical protein	c
ecl8_00213	yhjX	putative MFS-type transporter YhjX	c
ecl8_00214	eptB	Kdo(2)-lipid A phosphoethanolamine 7''-transferase	c
ecl8_00215	ecl8_00215	hypothetical protein	c
ecl8_00216	ecl8_00216	tRNA-Pro	c
ecl8_00217	ecl8_00217	hypothetical protein	c
ecl8_00218	ecl8_00218	hypothetical protein	c
ecl8_00219	dppA_1	Periplasmic dipeptide transport protein	c
ecl8_00220	dppB_1	Dipeptide transport system permease protein DppB	c
ecl8_00221	dppC	Dipeptide transport system permease protein DppC	c
ecl8_00222	dppD_1	Dipeptide transport ATP-binding protein DppD	c
ecl8_00223	oppF_1	Oligopeptide transport ATP-binding protein OppF	c
ecl8_00224	ecl8_00224	hypothetical protein	c
ecl8_00225	bcsQ_1	Cellulose biosynthesis protein BcsQ	c
ecl8_00226	acsAB	Cellulose synthase 1	c
ecl8_00227	bcsB_1	Cyclic di-GMP-binding protein	c
ecl8_00228	acsC	Cellulose synthase operon protein C	c
ecl8_00229	acsD	Cellulose synthase operon protein D	c
ecl8_00230	ecl8_00230	Endoglucanase	c
ecl8_00231	ecl8_00231	hypothetical protein	c
ecl8_00232	ecl8_00232	hypothetical protein	c
ecl8_00233	bcsE	Cyclic di-GMP binding protein BcsE	c
ecl8_00234	yhjR	Protein YhjR	c
ecl8_00235	bcsQ_2	Cellulose biosynthesis protein BcsQ	c
ecl8_00236	bcsA	Cellulose synthase catalytic subunit [UDP-forming]	c
ecl8_00237	bcsB_2	Cyclic di-GMP-binding protein	c
ecl8_00238	bcsZ	Endoglucanase	c
ecl8_00239	bcsC	Cellulose synthase operon protein C	c
ecl8_00240	pdeK	putative cyclic di-GMP phosphodiesterase PdeK	c
ecl8_00241	dctA_1	Aerobic C4-dicarboxylate transport protein	c
ecl8_00242	yhjJ	Protein YhjJ	c
ecl8_00243	kdgK_2	2-dehydro-3-deoxygluconokinase	c
ecl8_00244	ecl8_00244	hypothetical protein	c
ecl8_00245	yhjE_1	Inner membrane metabolite transport protein YhjE	c
ecl8_00246	yhjD	Inner membrane protein YhjD	c
ecl8_00247	dmlR_2	HTH-type transcriptional regulator DmlR	c
ecl8_00248	fabG_1	3-oxoacyl-[acyl-carrier-protein] reductase FabG	c
ecl8_00249	speG_1	Spermidine N(1)-acetyltransferase	c
ecl8_00250	treF	Cytoplasmic trehalase	c
ecl8_00251	adh1_1	Long-chain-alcohol dehydrogenase 1	c
ecl8_00252	gstB_1	Glutathione S-transferase GstB	c
ecl8_00253	gor	Glutathione reductase	c
ecl8_00254	rlmJ	Ribosomal RNA large subunit methyltransferase J	c
ecl8_00255	phoC_1	Major phosphate-irrepressible acid phosphatase	c
ecl8_00256	prlC	Oligopeptidase A	c
ecl8_00257	rsmJ	Ribosomal RNA small subunit methyltransferase J	c
ecl8_00258	dtpB	Dipeptide and tripeptide permease B	c
ecl8_00259	uspA_1	Universal stress protein A	c
ecl8_00260	uspB	Universal stress protein B	c
ecl8_00261	pitA	Low-affinity inorganic phosphate transporter 1	c
ecl8_00262	ecl8_00262	hypothetical protein	c
ecl8_00263	ecl8_00263	Magnesium transporter MgtE	c
ecl8_00264	ecl8_00264	hypothetical protein	c
ecl8_00265	nikR	Nickel-responsive regulator	c
ecl8_00266	nikE	Nickel import ATP-binding protein NikE	c
ecl8_00267	nikD	Nickel import ATP-binding protein NikD	c
ecl8_00268	nikC	Nickel transport system permease protein NikC	c
ecl8_00269	nikB	Nickel transport system permease protein NikB	c
ecl8_00270	nikA	Nickel-binding periplasmic protein	c
ecl8_00271	allS_1	HTH-type transcriptional activator AllS	c
ecl8_00272	padC	Phenolic acid decarboxylase PadC	c
ecl8_00273	arnB	UDP-4-amino-4-deoxy-L-arabinose--oxoglutarate aminotransferase	c
ecl8_00274	arnC	Undecaprenyl-phosphate 4-deoxy-4-formamido-L-arabinose transferase	c
ecl8_00275	arnA	Bifunctional polymyxin resistance protein ArnA	c
ecl8_00276	arnD	putative 4-deoxy-4-formamido-L-arabinose-phosphoundecaprenol deformylase ArnD	c
ecl8_00277	arnT	Undecaprenyl phosphate-alpha-4-amino-4-deoxy-L-arabinose arabinosyl transferase	c
ecl8_00278	arnE	putative 4-amino-4-deoxy-L-arabinose-phosphoundecaprenol flippase subunit ArnE	c
ecl8_00279	arnF	putative 4-amino-4-deoxy-L-arabinose-phosphoundecaprenol flippase subunit ArnF	c
ecl8_00280	yhhT_1	Putative transport protein YhhT	c
ecl8_00281	yhhS_1	putative MFS-type transporter YhhS	c
ecl8_00282	ecl8_00282	hypothetical protein	c
ecl8_00283	yhhQ	Queuosine precursor transporter	c
ecl8_00284	tusA	Sulfur carrier protein TusA	c
ecl8_00285	zntA	Zinc/cadmium/lead-transporting P-type ATPase	c
ecl8_00286	ecl8_00286	hypothetical protein	c
ecl8_00287	ecl8_00287	hypothetical protein	c
ecl8_00288	ecl8_00288	hypothetical protein	c
ecl8_00289	rsmD	Ribosomal RNA small subunit methyltransferase D	c
ecl8_00290	ftsY	Signal recognition particle receptor FtsY	c
ecl8_00291	ftsE	Cell division ATP-binding protein FtsE	c
ecl8_00292	ftsX	Cell division protein FtsX	c
ecl8_00293	rpoH	RNA polymerase sigma factor RpoH	c
ecl8_00294	gabR_1	HTH-type transcriptional regulatory protein GabR	c
ecl8_00295	puuE	4-aminobutyrate aminotransferase PuuE	c
ecl8_00296	tyrP_1	Tyrosine-specific transport protein	c
ecl8_00297	livJ_1	Leu/Ile/Val-binding protein	c
ecl8_00298	panM	PanD regulatory factor	c
ecl8_00299	livK	Leucine-specific-binding protein	c
ecl8_00300	livH_1	High-affinity branched-chain amino acid transport system permease protein LivH	c
ecl8_00301	ecl8_00301	hypothetical protein	c
ecl8_00302	lptB_1	Lipopolysaccharide export system ATP-binding protein LptB	c
ecl8_00303	livF_1	High-affinity branched-chain amino acid transport ATP-binding protein LivF	c
ecl8_00304	ugpB_1	sn-glycerol-3-phosphate-binding periplasmic protein UgpB	c
ecl8_00305	ugpA_1	sn-glycerol-3-phosphate transport system permease protein UgpA	c
ecl8_00306	lacG_1	Lactose transport system permease protein LacG	c
ecl8_00307	ugpC_1	sn-glycerol-3-phosphate import ATP-binding protein UgpC	c
ecl8_00308	ugpQ	Glycerophosphodiester phosphodiesterase, cytoplasmic	c
ecl8_00309	yhhA	putative protein YhhA	c
ecl8_00310	ggt	Glutathione hydrolase proenzyme	c
ecl8_00311	aaaT	L-amino acid N-acetyltransferase AaaT	c
ecl8_00312	ecl8_00312	hypothetical protein	c
ecl8_00313	yhhX	putative oxidoreductase YhhX	c
ecl8_00314	yhhW_1	Quercetin 2,3-dioxygenase	c
ecl8_00315	gntR_1	HTH-type transcriptional regulator GntR	c
ecl8_00316	gntK	Thermoresistant gluconokinase	c
ecl8_00317	gntU	Low-affinity gluconate transporter	c
ecl8_00318	asd_1	Aspartate-semialdehyde dehydrogenase	c
ecl8_00319	glgB	1,4-alpha-glucan branching enzyme GlgB	c
ecl8_00320	glgX	Glycogen debranching enzyme	c
ecl8_00321	glgC_1	Glucose-1-phosphate adenylyltransferase	c
ecl8_00322	glgA	Glycogen synthase	c
ecl8_00323	malP_3	Maltodextrin phosphorylase	c
ecl8_00324	glpD	Aerobic glycerol-3-phosphate dehydrogenase	c
ecl8_00325	glpE_1	Thiosulfate sulfurtransferase GlpE	c
ecl8_00326	glpG	Rhomboid protease GlpG	c
ecl8_00327	glpR_1	Glycerol-3-phosphate regulon repressor	c
ecl8_00328	malT	HTH-type transcriptional regulator MalT	c
ecl8_00329	malP_4	Maltodextrin phosphorylase	c
ecl8_00330	malQ	4-alpha-glucanotransferase	c
ecl8_00331	gntT	High-affinity gluconate transporter	c
ecl8_00332	nfuA	Fe/S biogenesis protein NfuA	c
ecl8_00333	pyrE_2	Orotate phosphoribosyltransferase	c
ecl8_00334	bioH	Pimeloyl-[acyl-carrier protein] methyl ester esterase	c
ecl8_00335	bhsA_1	Multiple stress resistance protein BhsA	c
ecl8_00336	feoC	putative [Fe-S]-dependent transcriptional repressor	c
ecl8_00337	feoB_1	Fe(2+) transporter FeoB	c
ecl8_00338	feoA	Fe(2+) transport protein A	c
ecl8_00339	yhgF	Protein YhgF	c
ecl8_00340	greB	Transcription elongation factor GreB	c
ecl8_00341	ompR_1	Transcriptional regulatory protein OmpR	c
ecl8_00342	envZ_1	Osmolarity sensor protein EnvZ	c
ecl8_00343	pckA_1	Phosphoenolpyruvate carboxykinase (ATP)	c
ecl8_00344	hslO	33 kDa chaperonin	c
ecl8_00345	hslR	Heat shock protein 15	c
ecl8_00346	yrfG	GMP/IMP nucleotidase YrfG	c
ecl8_00347	igaA	Intracellular growth attenuator protein igaA	c
ecl8_00348	nudE	ADP compounds hydrolase NudE	c
ecl8_00349	mrcA	Penicillin-binding protein 1A	c
ecl8_00350	ecl8_00350	hypothetical protein	c
ecl8_00351	ecl8_00351	hypothetical protein	c
ecl8_00352	ecl8_00352	hypothetical protein	c
ecl8_00353	pilQ	Type IV pilus biogenesis and competence protein PilQ	c
ecl8_00354	aroK_1	Shikimate kinase 1	c
ecl8_00355	aroB	3-dehydroquinate synthase	c
ecl8_00356	damX	Cell division protein DamX	c
ecl8_00357	dam_1	DNA adenine methylase	c
ecl8_00358	rpe	Ribulose-phosphate 3-epimerase	c
ecl8_00359	gph	Phosphoglycolate phosphatase	c
ecl8_00360	trpS	Tryptophan--tRNA ligase	c
ecl8_00361	cysG_1	Siroheme synthase	c
ecl8_00362	nirD	Nitrite reductase (NADH) small subunit	c
ecl8_00363	nasD_1	Nitrite reductase [NAD(P)H]	c
ecl8_00364	ecl8_00364	hypothetical protein	c
ecl8_00365	codA_1	Cytosine deaminase	c
ecl8_00366	tsgA	Protein TsgA	c
ecl8_00367	ppiA	Peptidyl-prolyl cis-trans isomerase A	c
ecl8_00368	yhfG	putative protein YhfG	c
ecl8_00369	fic	putative adenosine monophosphate-protein transferase fic	c
ecl8_00370	pabA	Aminodeoxychorismate synthase component 2	c
ecl8_00371	argD	Acetylornithine/succinyldiaminopimelate aminotransferase	c
ecl8_00372	yccS_1	Inner membrane protein YccS	c
ecl8_00373	crp	cAMP-activated global transcriptional regulator CRP	c
ecl8_00374	yhfA	Protein YhfA	c
ecl8_00375	cfxP	Phosphoribulokinase, plasmid	c
ecl8_00376	ecl8_00376	hypothetical protein	c
ecl8_00377	ecl8_00377	hypothetical protein	c
ecl8_00378	yheS_2	putative ABC transporter ATP-binding protein YheS	c
ecl8_00379	ywrO_1	General stress protein 14	c
ecl8_00380	kefC_1	Glutathione-regulated potassium-efflux system protein KefC	c
ecl8_00381	ecl8_00381	hypothetical protein	c
ecl8_00382	slyD	FKBP-type peptidyl-prolyl cis-trans isomerase SlyD	c
ecl8_00383	slyX	Protein SlyX	c
ecl8_00384	fkpA_1	FKBP-type peptidyl-prolyl cis-trans isomerase FkpA	c
ecl8_00385	dauR	Transcriptional regulator DauR	c
ecl8_00386	tusD	Sulfurtransferase TusD	c
ecl8_00387	tusC	Protein TusC	c
ecl8_00388	tusB	Protein TusB	c
ecl8_00389	rpsL	30S ribosomal protein S12	c
ecl8_00390	rpsG	30S ribosomal protein S7	c
ecl8_00391	fusA_1	Elongation factor G	c
ecl8_00392	tufA_1	Elongation factor Tu 1	c
ecl8_00393	bfd	Bacterioferritin-associated ferredoxin	c
ecl8_00394	bfr	Bacterioferritin	c
ecl8_00395	outO_1	Type 4 prepilin-like proteins leader peptide-processing enzyme	c
ecl8_00396	rpsJ	30S ribosomal protein S10	c
ecl8_00397	rplC	50S ribosomal protein L3	c
ecl8_00398	rplD	50S ribosomal protein L4	c
ecl8_00399	rplW	50S ribosomal protein L23	c
ecl8_00400	rplB	50S ribosomal protein L2	c
ecl8_00401	rpsS	30S ribosomal protein S19	c
ecl8_00402	rplV	50S ribosomal protein L22	c
ecl8_00403	rpsC	30S ribosomal protein S3	c
ecl8_00404	rplP	50S ribosomal protein L16	c
ecl8_00405	rpmC	50S ribosomal protein L29	c
ecl8_00406	rpsQ	30S ribosomal protein S17	c
ecl8_00407	rplN	50S ribosomal protein L14	c
ecl8_00408	rplX	50S ribosomal protein L24	c
ecl8_00409	rplE	50S ribosomal protein L5	c
ecl8_00410	rpsN	30S ribosomal protein S14	c
ecl8_00411	rpsH	30S ribosomal protein S8	c
ecl8_00412	rplF	50S ribosomal protein L6	c
ecl8_00413	rplR	50S ribosomal protein L18	c
ecl8_00414	rpsE	30S ribosomal protein S5	c
ecl8_00415	rpmD	50S ribosomal protein L30	c
ecl8_00416	rplO	50S ribosomal protein L15	c
ecl8_00417	secY	Protein translocase subunit SecY	c
ecl8_00418	rpsM	30S ribosomal protein S13	c
ecl8_00419	rpsD	30S ribosomal protein S4	c
ecl8_00420	rpoA	DNA-directed RNA polymerase subunit alpha	c
ecl8_00421	rplQ	50S ribosomal protein L17	c
ecl8_00422	ecl8_00422	hypothetical protein	c
ecl8_00423	zntR	HTH-type transcriptional regulator ZntR	c
ecl8_00424	ecl8_00424	hypothetical protein	c
ecl8_00425	arfA	Alternative ribosome-rescue factor A	c
ecl8_00426	mscL	Large-conductance mechanosensitive channel	c
ecl8_00427	trkA	Trk system potassium uptake protein TrkA	c
ecl8_00428	rsmB	Ribosomal RNA small subunit methyltransferase B	c
ecl8_00429	fmt	Methionyl-tRNA formyltransferase	c
ecl8_00430	def_1	Peptide deformylase	c
ecl8_00431	dprA	DNA processing protein DprA	c
ecl8_00432	smg	Protein Smg	c
ecl8_00433	topA_1	DNA topoisomerase 1	c
ecl8_00434	tsaC	Threonylcarbamoyl-AMP synthase	c
ecl8_00435	aroE_1	Shikimate dehydrogenase (NADP(+))	c
ecl8_00436	ecl8_00436	hypothetical protein	c
ecl8_00437	yrdA_1	Protein YrdA	c
ecl8_00438	ecl8_00438	16S ribosomal RNA	c
ecl8_00439	ecl8_00439	23S ribosomal RNA	c
ecl8_00440	ecl8_00440	5S ribosomal RNA	c
ecl8_00441	ecl8_00441	tRNA-Thr	c
ecl8_00442	ecl8_00442	5S ribosomal RNA	c
ecl8_00443	ecl8_00443	hypothetical protein	c
ecl8_00444	acrF	Multidrug export protein AcrF	c
ecl8_00445	acrE	Multidrug export protein AcrE	c
ecl8_00446	acrR_1	HTH-type transcriptional regulator AcrR	c
ecl8_00447	fis	DNA-binding protein Fis	c
ecl8_00448	dus	putative tRNA-dihydrouridine synthase	c
ecl8_00449	prmA	Ribosomal protein L11 methyltransferase	c
ecl8_00450	panF	Sodium/pantothenate symporter	c
ecl8_00451	yhdT	putative membrane protein YhdT	c
ecl8_00452	accC_1	Biotin carboxylase	c
ecl8_00453	accB_1	Biotin carboxyl carrier protein of acetyl-CoA carboxylase	c
ecl8_00454	aroQ	3-dehydroquinate dehydratase	c
ecl8_00455	msrQ	Protein-methionine-sulfoxide reductase heme-binding subunit MsrQ	c
ecl8_00456	msrP	Protein-methionine-sulfoxide reductase catalytic subunit MsrP	c
ecl8_00457	csrD	RNase E specificity factor CsrD	c
ecl8_00458	mreB	Rod shape-determining protein MreB	c
ecl8_00459	mreC	Cell shape-determining protein MreC	c
ecl8_00460	mreD	Rod shape-determining protein MreD	c
ecl8_00461	yhdE	Maf-like protein YhdE	c
ecl8_00462	rng	Ribonuclease G	c
ecl8_00463	ecl8_00463	hypothetical protein	c
ecl8_00464	tldD	Metalloprotease TldD	c
ecl8_00465	dmlR_3	HTH-type transcriptional regulator DmlR	c
ecl8_00466	aaeX	Protein AaeX	c
ecl8_00467	aaeA_1	p-hydroxybenzoic acid efflux pump subunit AaeA	c
ecl8_00468	aaeB_1	p-hydroxybenzoic acid efflux pump subunit AaeB	c
ecl8_00469	yhcO	putative protein YhcO	c
ecl8_00470	bhsA_2	Multiple stress resistance protein BhsA	c
ecl8_00471	bhsA_3	Multiple stress resistance protein BhsA	c
ecl8_00472	argR	Arginine repressor	c
ecl8_00473	mdh_1	Malate dehydrogenase	c
ecl8_00474	degS	Serine endoprotease DegS	c
ecl8_00475	degQ	Periplasmic pH-dependent serine endoprotease DegQ	c
ecl8_00476	yhcB	Inner membrane protein YhcB	c
ecl8_00477	zapE_1	Cell division protein ZapE	c
ecl8_00478	rplM	50S ribosomal protein L13	c
ecl8_00479	rpsI	30S ribosomal protein S9	c
ecl8_00480	sspA	Stringent starvation protein A	c
ecl8_00481	sspB	Stringent starvation protein B	c
ecl8_00482	nanE	Putative N-acetylmannosamine-6-phosphate 2-epimerase	c
ecl8_00483	gltD_1	Glutamate synthase [NADPH] small chain	c
ecl8_00484	gltB	Glutamate synthase [NADPH] large chain	c
ecl8_00485	rimO_1	Ribosomal protein S12 methylthiotransferase RimO	c
ecl8_00486	exuT_1	Hexuronate transporter	c
ecl8_00487	rspB	Starvation-sensing protein RspB	c
ecl8_00488	uxuA_1	Mannonate dehydratase	c
ecl8_00489	arcB	Aerobic respiration control sensor protein ArcB	c
ecl8_00490	elbB	Glyoxalase ElbB	c
ecl8_00491	mtgA	Biosynthetic peptidoglycan transglycosylase	c
ecl8_00492	ptsO	Phosphocarrier protein NPr	c
ecl8_00493	rapZ	RNase adapter protein RapZ	c
ecl8_00494	ptsN	Nitrogen regulatory protein	c
ecl8_00495	hpf_1	Ribosome hibernation promoting factor	c
ecl8_00496	rpoN	RNA polymerase sigma-54 factor	c
ecl8_00497	lptB_2	Lipopolysaccharide export system ATP-binding protein LptB	c
ecl8_00498	lptA	Lipopolysaccharide export system protein LptA	c
ecl8_00499	lptC	Lipopolysaccharide export system protein LptC	c
ecl8_00500	kdsC	3-deoxy-D-manno-octulosonate 8-phosphate phosphatase KdsC	c
ecl8_00501	kdsD	Arabinose 5-phosphate isomerase KdsD	c
ecl8_00502	yrbG	Inner membrane protein YrbG	c
ecl8_00503	mlaF	putative phospholipid import ATP-binding protein MlaF	c
ecl8_00504	mlaE	putative phospholipid ABC transporter permease protein MlaE	c
ecl8_00505	mlaD	putative phospholipid ABC transporter-binding protein MlaD	c
ecl8_00506	mlaC	putative phospholipid-binding protein MlaC	c
ecl8_00507	mlaB	putative phospholipid ABC transporter-binding protein MlaB	c
ecl8_00508	ibaG	Acid stress protein IbaG	c
ecl8_00509	murA	UDP-N-acetylglucosamine 1-carboxyvinyltransferase	c
ecl8_00510	ecl8_00510	hypothetical protein	c
ecl8_00511	ispB	Octaprenyl diphosphate synthase	c
ecl8_00512	rplU	50S ribosomal protein L21	c
ecl8_00513	rpmA	50S ribosomal protein L27	c
ecl8_00514	yhbE	putative inner membrane transporter YhbE	c
ecl8_00515	obgE	GTPase ObgE/CgtA	c
ecl8_00516	dacB	D-alanyl-D-alanine carboxypeptidase DacB	c
ecl8_00517	greA	Transcription elongation factor GreA	c
ecl8_00518	yhbY	RNA-binding protein YhbY	c
ecl8_00519	rlmE	Ribosomal RNA large subunit methyltransferase E	c
ecl8_00520	ftsH_1	ATP-dependent zinc metalloprotease FtsH	c
ecl8_00521	folP	Dihydropteroate synthase	c
ecl8_00522	glmM	Phosphoglucosamine mutase	c
ecl8_00523	secG	Protein-export membrane protein SecG	c
ecl8_00524	ecl8_00524	tRNA-Leu	c
ecl8_00525	ecl8_00525	hypothetical protein	c
ecl8_00526	ecl8_00526	hypothetical protein	c
ecl8_00527	ecl8_00527	hypothetical protein	c
ecl8_00528	argG	Argininosuccinate synthase	c
ecl8_00529	ecl8_00529	tRNA-Met	c
ecl8_00530	rimP	Ribosome maturation factor RimP	c
ecl8_00531	nusA	Transcription termination/antitermination protein NusA	c
ecl8_00532	infB	Translation initiation factor IF-2	c
ecl8_00533	rbfA	30S ribosome-binding factor	c
ecl8_00534	truB	tRNA pseudouridine synthase B	c
ecl8_00535	rpsO	30S ribosomal protein S15	c
ecl8_00536	pnp	Polyribonucleotide nucleotidyltransferase	c
ecl8_00537	nlpI	Lipoprotein NlpI	c
ecl8_00538	deaD	ATP-dependent RNA helicase DeaD	c
ecl8_00539	mtr	Tryptophan-specific transport protein	c
ecl8_00540	limB_1	Limonene 1,2-monooxygenase	c
ecl8_00541	ecl8_00541	hypothetical protein	c
ecl8_00542	yhbU	putative protease YhbU	c
ecl8_00543	ecl8_00543	hypothetical protein	c
ecl8_00544	ecl8_00544	hypothetical protein	c
ecl8_00545	ecl8_00545	hypothetical protein	c
ecl8_00546	ecl8_00546	hypothetical protein	c
ecl8_00547	yhbO	Protein/nucleic acid deglycase 2	c
ecl8_00548	ecl8_00548	hypothetical protein	c
ecl8_00549	ecl8_00549	Putative two-component membrane permease complex subunit SMU_747c	c
ecl8_00550	osmY_1	Osmotically-inducible protein Y	c
ecl8_00551	diaA	DnaA initiator-associating protein DiaA	c
ecl8_00552	ecl8_00552	hypothetical protein	c
ecl8_00553	lpoA	Penicillin-binding protein activator LpoA	c
ecl8_00554	rsmI	Ribosomal RNA small subunit methyltransferase I	c
ecl8_00555	garD	Galactarate dehydratase (L-threo-forming)	c
ecl8_00556	ecl8_00556	hypothetical protein	c
ecl8_00557	garP	putative galactarate transporter	c
ecl8_00558	garL	5-keto-4-deoxy-D-glucarate aldolase	c
ecl8_00559	garR	2-hydroxy-3-oxopropionate reductase	c
ecl8_00560	garK_1	Glycerate 2-kinase	c
ecl8_00561	ecl8_00561	hypothetical protein	c
ecl8_00562	ecl8_00562	hypothetical protein	c
ecl8_00563	ecl8_00563	hypothetical protein	c
ecl8_00564	yhaK	Pirin-like protein YhaK	c
ecl8_00565	yhaJ_1	HTH-type transcriptional regulator YhaJ	c
ecl8_00566	yhaH	Inner membrane protein YhaH	c
ecl8_00567	yqjG	Glutathionyl-hydroquinone reductase YqjG	c
ecl8_00568	yqjF	Inner membrane protein YqjF	c
ecl8_00569	ecl8_00569	hypothetical protein	c
ecl8_00570	yqjE	Inner membrane protein YqjE	c
ecl8_00571	yqjD	putative protein YqjD	c
ecl8_00572	yqjC	Protein YqjC	c
ecl8_00573	mzrA	Modulator protein MzrA	c
ecl8_00574	yqjA	Inner membrane protein YqjA	c
ecl8_00575	lldR_2	Putative L-lactate dehydrogenase operon regulatory protein	c
ecl8_00576	exuT_2	Hexuronate transporter	c
ecl8_00577	uxaC	Uronate isomerase	c
ecl8_00578	uxaA	Altronate dehydratase	c
ecl8_00579	ygjV	Inner membrane protein YgjV	c
ecl8_00580	sstT	Serine/threonine transporter SstT	c
ecl8_00581	alx	Putative membrane-bound redox modulator Alx	c
ecl8_00582	iolU_1	scyllo-inositol 2-dehydrogenase (NADP(+)) IolU	c
ecl8_00583	ygjP	UTP pyrophosphatase	c
ecl8_00584	sutR_1	HTH-type transcriptional regulator SutR	c
ecl8_00585	ecl8_00585	hypothetical protein	c
ecl8_00586	rlmG	Ribosomal RNA large subunit methyltransferase G	c
ecl8_00587	fadH	2,4-dienoyl-CoA reductase	c
ecl8_00588	lsrK	Autoinducer-2 kinase	c
ecl8_00589	lsrR_1	Transcriptional regulator LsrR	c
ecl8_00590	lsrA	Autoinducer 2 import ATP-binding protein LsrA	c
ecl8_00591	lsrC	Autoinducer 2 import system permease protein LsrC	c
ecl8_00592	lsrD_1	Autoinducer 2 import system permease protein LsrD	c
ecl8_00593	lsrB_1	Autoinducer 2-binding protein LsrB	c
ecl8_00594	lsrF	3-hydroxy-5-phosphonooxypentane-2,4-dione thiolase	c
ecl8_00595	lsrG	(4S)-4-hydroxy-5-phosphonooxypentane-2,3-dione isomerase	c
ecl8_00596	ygjK	Glucosidase YgjK	c
ecl8_00597	ecl8_00597	hypothetical protein	c
ecl8_00598	ygjI_1	Inner membrane transporter YgjI	c
ecl8_00599	ygjI_2	Inner membrane transporter YgjI	c
ecl8_00600	ebgC	Evolved beta-galactosidase subunit beta	c
ecl8_00601	ebgA	Evolved beta-galactosidase subunit alpha	c
ecl8_00602	lacR	HTH-type transcriptional regulator LacR	c
ecl8_00603	ygjH	tRNA-binding protein YgjH	c
ecl8_00604	patA	Putrescine aminotransferase	c
ecl8_00605	yqjI	Transcriptional regulator YqjI	c
ecl8_00606	yqjH	NADPH-dependent ferric-chelate reductase	c
ecl8_00607	dhaK_1	Dihydroxyacetone kinase	c
ecl8_00608	dhaM	Protein-lysine deacetylase	c
ecl8_00609	dhaL	PEP-dependent dihydroxyacetone kinase, ADP-binding subunit DhaL	c
ecl8_00610	dhaK_2	PEP-dependent dihydroxyacetone kinase, dihydroxyacetone-binding subunit DhaK	c
ecl8_00611	dhaD	Glycerol dehydrogenase	c
ecl8_00612	dhaR	PTS-dependent dihydroxyacetone kinase operon regulatory protein	c
ecl8_00613	yvqK_1	Cob(I)yrinic acid a,c-diamide adenosyltransferase	c
ecl8_00614	ecl8_00614	hypothetical protein	c
ecl8_00615	dhaT	1,3-propanediol dehydrogenase	c
ecl8_00616	ecl8_00616	hypothetical protein	c
ecl8_00617	dhaB	Glycerol dehydratase large subunit	c
ecl8_00618	pduD_1	Propanediol dehydratase medium subunit	c
ecl8_00619	pduE_1	Propanediol dehydratase small subunit	c
ecl8_00620	ddrA_1	Diol dehydratase-reactivating factor alpha subunit	c
ecl8_00621	glpF_2	Glycerol uptake facilitator protein	c
ecl8_00622	hdeB_1	Acid stress chaperone HdeB	c
ecl8_00623	hdeD_1	Protein HdeD	c
ecl8_00624	yfdX	Protein YfdX	c
ecl8_00625	evgS_1	Sensor protein EvgS	c
ecl8_00626	evgA_1	DNA-binding transcriptional activator EvgA	c
ecl8_00627	hdeB_2	Acid stress chaperone HdeB	c
ecl8_00628	ecl8_00628	hypothetical protein	c
ecl8_00629	ecl8_00629	tRNA-Met	c
ecl8_00630	mug	G/U mismatch-specific DNA glycosylase	c
ecl8_00631	rpoD	RNA polymerase sigma factor RpoD	c
ecl8_00632	dnaG	DNA primase	c
ecl8_00633	rpsU	30S ribosomal protein S21	c
ecl8_00634	tsaD	tRNA N6-adenosine threonylcarbamoyltransferase	c
ecl8_00635	ecl8_00635	hypothetical protein	c
ecl8_00636	ureG_1	Urease accessory protein UreG	c
ecl8_00637	ureF_1	Urease accessory protein UreF	c
ecl8_00638	ureE_1	Urease accessory protein UreE	c
ecl8_00639	ureC_1	Urease subunit alpha	c
ecl8_00640	ureB_1	Urease subunit beta	c
ecl8_00641	ureA	Urease subunit gamma	c
ecl8_00642	ureD	Urease accessory protein UreD	c
ecl8_00643	plsY	putative glycerol-3-phosphate acyltransferase	c
ecl8_00644	folB	Dihydroneopterin aldolase	c
ecl8_00645	uppP	Undecaprenyl-diphosphatase	c
ecl8_00646	cca	Multifunctional CCA protein	c
ecl8_00647	ecl8_00647	hypothetical protein	c
ecl8_00648	ygiF	Inorganic triphosphatase	c
ecl8_00649	glnE	Bifunctional glutamine synthetase adenylyltransferase/adenylyl-removing enzyme	c
ecl8_00650	hldE	Bifunctional protein HldE	c
ecl8_00651	glgS	Surface composition regulator	c
ecl8_00652	yqiC	putative protein YqiC	c
ecl8_00653	ribB	3,4-dihydroxy-2-butanone 4-phosphate synthase	c
ecl8_00654	zupT	Zinc transporter ZupT	c
ecl8_00655	ygiD	4,5-DOPA dioxygenase extradiol	c
ecl8_00656	ygiC	Putative acid--amine ligase YgiC	c
ecl8_00657	ecl8_00657	hypothetical protein	c
ecl8_00658	tolC	Outer membrane protein TolC	c
ecl8_00659	nudF	ADP-ribose pyrophosphatase	c
ecl8_00660	ecl8_00660	hypothetical protein	c
ecl8_00661	cpdA_1	3',5'-cyclic adenosine monophosphate phosphodiesterase CpdA	c
ecl8_00662	ecl8_00662	hypothetical protein	c
ecl8_00663	parE	DNA topoisomerase 4 subunit B	c
ecl8_00664	ygiN	putative quinol monooxygenase YgiN	c
ecl8_00665	mdaB	Modulator of drug activity B	c
ecl8_00666	qseC	Sensor protein QseC	c
ecl8_00667	qseB	Transcriptional regulatory protein QseB	c
ecl8_00668	ygiW_1	Protein YgiW	c
ecl8_00669	adaA_1	Bifunctional transcriptional activator/DNA repair enzyme AdaA	c
ecl8_00670	parC	DNA topoisomerase 4 subunit A	c
ecl8_00671	plsC	1-acyl-sn-glycerol-3-phosphate acyltransferase	c
ecl8_00672	ftsP	Cell division protein FtsP	c
ecl8_00673	rimO_2	Ribosomal protein S12 methylthiotransferase RimO	c
ecl8_00674	ecl8_00674	hypothetical protein	c
ecl8_00675	ecl8_00675	hypothetical protein	c
ecl8_00676	dkgA	2,5-diketo-D-gluconic acid reductase A	c
ecl8_00677	yqhD	Alcohol dehydrogenase YqhD	c
ecl8_00678	rclR_2	RCS-specific HTH-type transcriptional activator RclR	c
ecl8_00679	yghB	Inner membrane protein YghB	c
ecl8_00680	metC_1	Cystathionine beta-lyase MetC	c
ecl8_00681	exbB	Biopolymer transport protein ExbB	c
ecl8_00682	exbD	Biopolymer transport protein ExbD	c
ecl8_00683	ecl8_00683	hypothetical protein	c
ecl8_00684	ecl8_00684	hypothetical protein	c
ecl8_00685	clcD_1	Carboxymethylenebutenolidase	c
ecl8_00686	ecl8_00686	hypothetical protein	c
ecl8_00687	yghU	Disulfide-bond oxidoreductase YghU	c
ecl8_00688	ecl8_00688	hypothetical protein	c
ecl8_00689	gss	Bifunctional glutathionylspermidine synthetase/amidase	c
ecl8_00690	lysN_1	2-aminoadipate transaminase	c
ecl8_00691	ecl8_00691	hypothetical protein	c
ecl8_00692	ecl8_00692	hypothetical protein	c
ecl8_00693	ecl8_00693	hypothetical protein	c
ecl8_00694	fabG_2	3-oxoacyl-[acyl-carrier-protein] reductase FabG	c
ecl8_00695	dmlR_4	HTH-type transcriptional regulator DmlR	c
ecl8_00696	metC_2	Cystathionine beta-lyase	c
ecl8_00697	cbs	Putative cystathionine beta-synthase	c
ecl8_00698	ecl8_00698	hypothetical protein	c
ecl8_00699	elfD_1	putative fimbrial chaperone protein ElfD	c
ecl8_00700	ecl8_00700	hypothetical protein	c
ecl8_00701	ecl8_00701	hypothetical protein	c
ecl8_00702	elfD_2	putative fimbrial chaperone protein ElfD	c
ecl8_00703	fimC_1	Chaperone protein FimC	c
ecl8_00704	yraJ	Outer membrane usher protein YraJ	c
ecl8_00705	ecl8_00705	hypothetical protein	c
ecl8_00706	intA_1	Prophage integrase IntA	c
ecl8_00707	ecl8_00707	tRNA-Phe	c
ecl8_00708	ydfK_1	putative membrane protein YdfK	c
ecl8_00709	speC	Constitutive ornithine decarboxylase	c
ecl8_00710	nupG_1	Nucleoside permease NupG	c
ecl8_00711	nupG_2	Nucleoside permease NupG	c
ecl8_00712	mltC	Membrane-bound lytic murein transglycosylase C	c
ecl8_00713	yggX	putative Fe(2+)-trafficking protein	c
ecl8_00714	mutY	Adenine DNA glycosylase	c
ecl8_00715	trmB	tRNA (guanine-N(7)-)-methyltransferase	c
ecl8_00716	ecl8_00716	hypothetical protein	c
ecl8_00717	ecl8_00717	hypothetical protein	c
ecl8_00718	xylH_2	Xylose transport system permease protein XylH	c
ecl8_00719	frcA_1	Fructose import ATP-binding protein FrcA	c
ecl8_00720	xylF_2	D-xylose-binding periplasmic protein	c
ecl8_00721	hemN_1	Oxygen-independent coproporphyrinogen-III oxidase-like protein	c
ecl8_00722	rdgB	dITP/XTP pyrophosphatase	c
ecl8_00723	ecl8_00723	hypothetical protein	c
ecl8_00724	ecl8_00724	hypothetical protein	c
ecl8_00725	yggS	Pyridoxal phosphate homeostasis protein	c
ecl8_00726	yggR	putative protein YggR	c
ecl8_00727	csgD_1	CsgBAC operon transcriptional regulatory protein	c
ecl8_00728	yqgF	Putative pre-16S rRNA nuclease	c
ecl8_00729	ecl8_00729	hypothetical protein	c
ecl8_00730	gshB	Glutathione synthetase	c
ecl8_00731	rsmE	Ribosomal RNA small subunit methyltransferase E	c
ecl8_00732	endA	Endonuclease-1	c
ecl8_00733	sprT	Protein SprT	c
ecl8_00734	galP	Galactose-proton symporter	c
ecl8_00735	metK	S-adenosylmethionine synthase	c
ecl8_00736	speA	Biosynthetic arginine decarboxylase	c
ecl8_00737	speB	Agmatinase	c
ecl8_00738	loiP	Metalloprotease LoiP	c
ecl8_00739	tktA_1	Transketolase 1	c
ecl8_00740	epd	D-erythrose-4-phosphate dehydrogenase	c
ecl8_00741	pgk	Phosphoglycerate kinase	c
ecl8_00742	fbaA_1	Fructose-bisphosphate aldolase class 2	c
ecl8_00743	mscS	Small-conductance mechanosensitive channel	c
ecl8_00744	argO	Arginine exporter protein ArgO	c
ecl8_00745	ecl8_00745	26 kDa periplasmic immunogenic protein	c
ecl8_00746	argP	HTH-type transcriptional regulator ArgP	c
ecl8_00747	rpiA	Ribose-5-phosphate isomerase A	c
ecl8_00748	serA	D-3-phosphoglycerate dehydrogenase	c
ecl8_00749	ygfA	5-formyltetrahydrofolate cyclo-ligase	c
ecl8_00750	zapA	Cell division protein ZapA	c
ecl8_00751	ecl8_00751	hypothetical protein	c
ecl8_00752	pepP	Xaa-Pro aminopeptidase	c
ecl8_00753	ubiH	2-octaprenyl-6-methoxyphenol hydroxylase	c
ecl8_00754	ubiI	2-octaprenylphenol hydroxylase	c
ecl8_00755	gcvT	Aminomethyltransferase	c
ecl8_00756	gcvH	Glycine cleavage system H protein	c
ecl8_00757	gcvP	Glycine dehydrogenase (decarboxylating)	c
ecl8_00758	ygfF	putative oxidoreductase YgfF	c
ecl8_00759	msrAB	Peptide methionine sulfoxide reductase MsrA/MsrB	c
ecl8_00760	bdbD	Disulfide bond formation protein D	c
ecl8_00761	dsbD_1	Thiol:disulfide interchange protein DsbD	c
ecl8_00762	ecl8_00762	hypothetical protein	c
ecl8_00763	bglA_1	6-phospho-beta-glucosidase BglA	c
ecl8_00764	glvR_2	HTH-type transcriptional regulator GlvR	c
ecl8_00765	ecl8_00765	hypothetical protein	c
ecl8_00766	ecl8_00766	hypothetical protein	c
ecl8_00767	ygfZ	tRNA-modifying protein YgfZ	c
ecl8_00768	sdhE	FAD assembly factor SdhE	c
ecl8_00769	ygfX	Inner membrane protein YgfX	c
ecl8_00770	fldB	Flavodoxin 2	c
ecl8_00771	xerD_1	Tyrosine recombinase XerD	c
ecl8_00772	dsbC	Thiol:disulfide interchange protein DsbC	c
ecl8_00773	recJ	Single-stranded-DNA-specific exonuclease RecJ	c
ecl8_00774	prfB	Peptide chain release factor RF2	c
ecl8_00775	lysS	Lysine--tRNA ligase	c
ecl8_00776	idi	Isopentenyl-diphosphate Delta-isomerase	c
ecl8_00777	nlpD_1	Murein hydrolase activator NlpD	c
ecl8_00778	ecl8_00778	tRNA-Gly	c
ecl8_00779	ribZ_1	Riboflavin transporter RibZ	c
ecl8_00780	nodD2_1	Nodulation protein D 2	c
ecl8_00781	ecl8_00781	hypothetical protein	c
ecl8_00782	evgA_2	DNA-binding transcriptional activator EvgA	c
ecl8_00783	ecl8_00783	hypothetical protein	c
ecl8_00784	evgS_2	Sensor protein EvgS	c
ecl8_00785	evgA_3	DNA-binding transcriptional activator EvgA	c
ecl8_00786	lpfC'	putative outer membrane usher protein LpfC'	c
ecl8_00787	esiB	Secretory immunoglobulin A-binding protein EsiB	c
ecl8_00788	hdeA	Acid stress chaperone HdeA	c
ecl8_00789	ecl8_00789	hypothetical protein	c
ecl8_00790	yejF_1	putative ABC transporter ATP-binding protein YejF	c
ecl8_00791	oppD_1	Oligopeptide transport ATP-binding protein OppD	c
ecl8_00792	ddpC_1	putative D,D-dipeptide transport system permease protein DdpC	c
ecl8_00793	gsiC_1	Glutathione transport system permease protein GsiC	c
ecl8_00794	appA_1	Oligopeptide-binding protein AppA	c
ecl8_00795	ecl8_00795	Urea transporter	c
ecl8_00796	ureH	Urease accessory protein UreH	c
ecl8_00797	ureG_2	Urease accessory protein UreG	c
ecl8_00798	ureF_2	Urease accessory protein UreF	c
ecl8_00799	ureE_2	Urease accessory protein UreE	c
ecl8_00800	ureC_2	Urease subunit alpha	c
ecl8_00801	ureB_2	Urease subunit beta	c
ecl8_00802	ureA2	Urease subunit gamma 2	c
ecl8_00803	amt	Ammonia channel	c
ecl8_00804	hdeB_3	Acid stress chaperone HdeB	c
ecl8_00805	hdeD_2	Protein HdeD	c
ecl8_00806	emrY	putative multidrug resistance protein EmrY	c
ecl8_00807	emrK_1	putative multidrug resistance protein EmrK	c
ecl8_00808	evgA_4	DNA-binding transcriptional activator EvgA	c
ecl8_00809	evgS_3	Sensor protein EvgS	c
ecl8_00810	crcB_1	Putative fluoride ion transporter CrcB	c
ecl8_00811	crcB_2	Putative fluoride ion transporter CrcB	c
ecl8_00812	ecl8_00812	hypothetical protein	c
ecl8_00813	ecl8_00813	hypothetical protein	c
ecl8_00814	pdeG_1	putative cyclic di-GMP phosphodiesterase PdeG	c
ecl8_00815	ecl8_00815	hypothetical protein	c
ecl8_00816	ecl8_00816	hypothetical protein	c
ecl8_00817	iolS_1	Aldo-keto reductase IolS	c
ecl8_00818	kefF_1	Glutathione-regulated potassium-efflux system ancillary protein KefF	c
ecl8_00819	ecl8_00819	hypothetical protein	c
ecl8_00820	pgrR_1	HTH-type transcriptional regulator PgrR	c
ecl8_00821	ecl8_00821	hypothetical protein	c
ecl8_00822	ecl8_00822	hypothetical protein	c
ecl8_00823	arsR2	Arsenic resistance transcriptional regulator ArsR2	c
ecl8_00824	arsB	Arsenical pump membrane protein	c
ecl8_00825	arsC	Arsenate reductase	c
ecl8_00826	dtpT	Di-/tripeptide transporter	c
ecl8_00827	ecl8_00827	hypothetical protein	c
ecl8_00828	cusC_1	Cation efflux system protein CusC	c
ecl8_00829	mdtO	Multidrug resistance protein MdtO	c
ecl8_00830	mdtN_1	Multidrug resistance protein MdtN	c
ecl8_00831	ecl8_00831	hypothetical protein	c
ecl8_00832	ecl8_00832	hypothetical protein	c
ecl8_00833	yjdJ	putative protein YjdJ	c
ecl8_00834	ecl8_00834	putative signaling protein	c
ecl8_00835	fimH	Type 1 fimbrin D-mannose specific adhesin	c
ecl8_00836	fimG	Protein FimG	c
ecl8_00837	fimF_1	Protein FimF	c
ecl8_00838	fimD_1	Outer membrane usher protein FimD	c
ecl8_00839	fimC_2	Chaperone protein FimC	c
ecl8_00840	lpfA	putative major fimbrial subunit LpfA	c
ecl8_00841	fim_1	Fimbrial subunit type 1	c
ecl8_00842	xerD_2	Tyrosine recombinase XerD	c
ecl8_00843	xerC_1	Tyrosine recombinase XerC	c
ecl8_00844	ecl8_00844	hypothetical protein	c
ecl8_00845	marR_1	Multiple antibiotic resistance protein MarR	c
ecl8_00846	ecl8_00846	hypothetical protein	c
ecl8_00847	ecl8_00847	hypothetical protein	c
ecl8_00848	ecl8_00848	hypothetical protein	c
ecl8_00849	yadV_1	putative fimbrial chaperone YadV	c
ecl8_00850	htrE_1	Outer membrane usher protein HtrE	c
ecl8_00851	mrkD_1	Fimbria adhesin protein	c
ecl8_00852	ecl8_00852	hypothetical protein	c
ecl8_00853	pdeH_1	Cyclic di-GMP phosphodiesterase PdeH	c
ecl8_00854	uhpA_2	Transcriptional regulatory protein UhpA	c
ecl8_00855	ycgR	Flagellar brake protein YcgR	c
ecl8_00856	pdxI	Pyridoxine 4-dehydrogenase	c
ecl8_00857	yqeG	Inner membrane transport protein YqeG	c
ecl8_00858	ecl8_00858	hypothetical protein	c
ecl8_00859	gltC_1	HTH-type transcriptional regulator GltC	c
ecl8_00860	thlA_1	Acetyl-CoA acetyltransferase	c
ecl8_00861	kdgM	Oligogalacturonate-specific porin KdgM	c
ecl8_00862	ogl	Oligogalacturonate lyase	c
ecl8_00863	kduD_1	2-dehydro-3-deoxy-D-gluconate 5-dehydrogenase	c
ecl8_00864	araE	Arabinose-proton symporter	c
ecl8_00865	cytR_1	HTH-type transcriptional repressor CytR	c
ecl8_00866	cscB	Sucrose permease	c
ecl8_00867	sacA	Sucrose-6-phosphate hydrolase	c
ecl8_00868	ecl8_00868	hypothetical protein	c
ecl8_00869	yesO	Putative ABC transporter substrate-binding protein YesO	c
ecl8_00870	sugC	Trehalose import ATP-binding protein SugC	c
ecl8_00871	araQ	L-arabinose transport system permease protein AraQ	c
ecl8_00872	lacF	Lactose transport system permease protein LacF	c
ecl8_00873	ecl8_00873	hypothetical protein	c
ecl8_00874	ygeA	Putative racemase YgeA	c
ecl8_00875	occR_1	Octopine catabolism/uptake operon regulatory protein OccR	c
ecl8_00876	lysA	Diaminopimelate decarboxylase	c
ecl8_00877	ascG_2	HTH-type transcriptional regulator AscG	c
ecl8_00878	licC_2	Lichenan permease IIC component	c
ecl8_00879	gmuD_1	6-phospho-beta-glucosidase GmuD	c
ecl8_00880	lldR_3	Putative L-lactate dehydrogenase operon regulatory protein	c
ecl8_00881	ecl8_00881	hypothetical protein	c
ecl8_00882	galR_1	HTH-type transcriptional regulator GalR	c
ecl8_00883	aas	Bifunctional protein Aas	c
ecl8_00884	lplT	Lysophospholipid transporter LplT	c
ecl8_00885	tas_1	Protein tas	c
ecl8_00886	ygdR_1	putative lipoprotein YgdR	c
ecl8_00887	ecl8_00887	hypothetical protein	c
ecl8_00888	mutH	DNA mismatch repair protein MutH	c
ecl8_00889	rppH	RNA pyrophosphohydrolase	c
ecl8_00890	ptsP	Phosphoenolpyruvate-dependent phosphotransferase system	c
ecl8_00891	lgt	Prolipoprotein diacylglyceryl transferase	c
ecl8_00892	thyA	Thymidylate synthase	c
ecl8_00893	ecl8_00893	hypothetical protein	c
ecl8_00894	ecl8_00894	hypothetical protein	c
ecl8_00895	ecl8_00895	hypothetical protein	c
ecl8_00896	ecl8_00896	hypothetical protein	c
ecl8_00897	recC	RecBCD enzyme subunit RecC	c
ecl8_00898	ptrA_1	Protease 3	c
ecl8_00899	recB	RecBCD enzyme subunit RecB	c
ecl8_00900	recD_1	RecBCD enzyme subunit RecD	c
ecl8_00901	recD_2	RecBCD enzyme subunit RecD	c
ecl8_00902	ecl8_00902	hypothetical protein	c
ecl8_00903	argA	Amino-acid acetyltransferase	c
ecl8_00904	amiC_1	N-acetylmuramoyl-L-alanine amidase AmiC	c
ecl8_00905	cobD_1	Threonine-phosphate decarboxylase	c
ecl8_00906	pduX	L-threonine kinase	c
ecl8_00907	pduW	putative propionate kinase	c
ecl8_00908	pduV_1	Propanediol utilization protein PduV	c
ecl8_00909	pduU	Propanediol utilization protein PduU	c
ecl8_00910	ccmK	Carbon dioxide-concentrating mechanism protein CcmK	c
ecl8_00911	rnfC	Electron transport complex subunit RnfC	c
ecl8_00912	adhE_1	Aldehyde-alcohol dehydrogenase	c
ecl8_00913	adhE_2	Aldehyde-alcohol dehydrogenase	c
ecl8_00914	yvqK_2	Cob(I)yrinic acid a,c-diamide adenosyltransferase	c
ecl8_00915	ccmL	Carbon dioxide concentrating mechanism protein CcmL	c
ecl8_00916	ecl8_00916	hypothetical protein	c
ecl8_00917	pduL	Phosphate propanoyltransferase	c
ecl8_00918	ccmK2	Carbon dioxide-concentrating mechanism protein CcmK	c
ecl8_00919	pduA_1	Propanediol utilization protein PduA	c
ecl8_00920	ecl8_00920	hypothetical protein	c
ecl8_00921	ddrA_2	Diol dehydratase-reactivating factor alpha subunit	c
ecl8_00922	pduE_2	Propanediol dehydratase small subunit	c
ecl8_00923	pduD_2	Propanediol dehydratase medium subunit	c
ecl8_00924	pduC	Propanediol dehydratase large subunit	c
ecl8_00925	pduB	Propanediol utilization protein PduB	c
ecl8_00926	pduA_2	Propanediol utilization protein PduA	c
ecl8_00927	pduF	Propanediol diffusion facilitator	c
ecl8_00928	araC_1	Arabinose operon regulatory protein	c
ecl8_00929	cbiA	Cobyrinate a,c-diamide synthase	c
ecl8_00930	cobD_2	Cobalamin biosynthesis protein CobD	c
ecl8_00931	cbiC	Cobalt-precorrin-8 methylmutase	c
ecl8_00932	cbiD	Cobalt-precorrin-5B C(1)-methyltransferase	c
ecl8_00933	cbiE	Cobalt-precorrin-7 C(5)-methyltransferase	c
ecl8_00934	cbiT	Cobalt-precorrin-6B C(15)-methyltransferase (decarboxylating)	c
ecl8_00935	cbiF	Cobalt-precorrin-4 C(11)-methyltransferase	c
ecl8_00936	cbiG	Cobalt-precorrin-5A hydrolase	c
ecl8_00937	cbiH	putative cobalt-factor III C(17)-methyltransferase	c
ecl8_00938	cbiJ	Cobalt-precorrin-6A reductase	c
ecl8_00939	cbiK	Sirohydrochlorin cobaltochelatase	c
ecl8_00940	cbiL	Cobalt-precorrin-2 C(20)-methyltransferase	c
ecl8_00941	cbiM	Cobalt transport protein CbiM	c
ecl8_00942	cbiN	Cobalt transport protein CbiN	c
ecl8_00943	cbiQ	Cobalt transport protein CbiQ	c
ecl8_00944	cbiO_1	Cobalt import ATP-binding protein CbiO	c
ecl8_00945	cobQ	Cobyric acid synthase	c
ecl8_00946	cobU	Bifunctional adenosylcobalamin biosynthesis protein CobU	c
ecl8_00947	cobT_1	Nicotinate-nucleotide--dimethylbenzimidazole phosphoribosyltransferase	c
ecl8_00948	ecl8_00948	tRNA-Met	c
ecl8_00949	ecl8_00949	tRNA-Met	c
ecl8_00950	ecl8_00950	tRNA-Met	c
ecl8_00951	mltA	Membrane-bound lytic murein transglycosylase A	c
ecl8_00952	tcdA	tRNA threonylcarbamoyladenosine dehydratase	c
ecl8_00953	csdE	Sulfur acceptor protein CsdE	c
ecl8_00954	csdA	Cysteine desulfurase CsdA	c
ecl8_00955	ygdR_2	putative lipoprotein YgdR	c
ecl8_00956	gcvA_1	Glycine cleavage system transcriptional activator	c
ecl8_00957	ecl8_00957	hypothetical protein	c
ecl8_00958	rlmM	Ribosomal RNA large subunit methyltransferase M	c
ecl8_00959	ydjF	putative HTH-type transcriptional regulator YdjF	c
ecl8_00960	fucU	L-fucose mutarotase	c
ecl8_00961	fucK	L-fuculokinase	c
ecl8_00962	fucI	L-fucose isomerase	c
ecl8_00963	fucP	L-fucose-proton symporter	c
ecl8_00964	fucA	L-fuculose phosphate aldolase	c
ecl8_00965	fucO	Lactaldehyde reductase	c
ecl8_00966	ygdG	Flap endonuclease Xni	c
ecl8_00967	zraR_1	Transcriptional regulatory protein ZraR	c
ecl8_00968	msuD_1	Methanesulfonate monooxygenase	c
ecl8_00969	ecl8_00969	hypothetical protein	c
ecl8_00970	dmoA	Dimethyl-sulfide monooxygenase	c
ecl8_00971	metN_1	Methionine import ATP-binding protein MetN	c
ecl8_00972	metI_1	D-methionine transport system permease protein MetI	c
ecl8_00973	metQ_1	D-methionine-binding lipoprotein MetQ	c
ecl8_00974	ygcS	Inner membrane metabolite transport protein YgcS	c
ecl8_00975	soxC	Dibenzothiophene desulfurization enzyme C	c
ecl8_00976	ssuA_1	Putative aliphatic sulfonates-binding protein	c
ecl8_00977	sdaB	L-serine dehydratase 2	c
ecl8_00978	sdaC_1	Serine transporter	c
ecl8_00979	ppnN	Pyrimidine/purine nucleotide 5'-monophosphate nucleosidase	c
ecl8_00980	queF	NADPH-dependent 7-cyano-7-deazaguanine reductase	c
ecl8_00981	syd	Protein Syd	c
ecl8_00982	yqcC	putative protein YqcC	c
ecl8_00983	truC	tRNA pseudouridine synthase C	c
ecl8_00984	ecl8_00984	hypothetical protein	c
ecl8_00985	gudP_1	putative glucarate transporter	c
ecl8_00986	gudX	Glucarate dehydratase-related protein	c
ecl8_00987	gudD	Glucarate dehydratase	c
ecl8_00988	garK_2	Glycerate 2-kinase	c
ecl8_00989	barA_1	Signal transduction histidine-protein kinase BarA	c
ecl8_00990	barA_2	Signal transduction histidine-protein kinase BarA	c
ecl8_00991	rlmD	23S rRNA (uracil(1939)-C(5))-methyltransferase RlmD	c
ecl8_00992	relA	GTP pyrophosphokinase	c
ecl8_00993	mazG	Nucleoside triphosphate pyrophosphohydrolase	c
ecl8_00994	pyrG_1	CTP synthase	c
ecl8_00995	eno	Enolase	c
ecl8_00996	lgrD	Linear gramicidin synthase subunit D	c
ecl8_00997	queE	7-carboxy-7-deazaguanine synthase	c
ecl8_00998	queD	6-carboxy-5,6,7,8-tetrahydropterin synthase	c
ecl8_00999	cysJ	Sulfite reductase [NADPH] flavoprotein alpha-component	c
ecl8_01000	cysI	Sulfite reductase [NADPH] hemoprotein beta-component	c
ecl8_01001	cysH_1	Phosphoadenosine phosphosulfate reductase	c
ecl8_01002	ywaD	Aminopeptidase YwaD	c
ecl8_01003	cysG_2	Siroheme synthase	c
ecl8_01004	cysD	Sulfate adenylyltransferase subunit 2	c
ecl8_01005	cysN	Sulfate adenylyltransferase subunit 1	c
ecl8_01006	cysC	Adenylyl-sulfate kinase	c
ecl8_01007	ygbE	Inner membrane protein YgbE	c
ecl8_01008	ftsB	Cell division protein FtsB	c
ecl8_01009	ispD	2-C-methyl-D-erythritol 4-phosphate cytidylyltransferase	c
ecl8_01010	ispF	2-C-methyl-D-erythritol 2,4-cyclodiphosphate synthase	c
ecl8_01011	truD	tRNA pseudouridine synthase D	c
ecl8_01012	surE	5'/3'-nucleotidase SurE	c
ecl8_01013	pcm	Protein-L-isoaspartate O-methyltransferase	c
ecl8_01014	nlpD_2	Murein hydrolase activator NlpD	c
ecl8_01015	rpoS	RNA polymerase sigma factor RpoS	c
ecl8_01016	ecl8_01016	hypothetical protein	c
ecl8_01017	hsrA_1	putative transport protein HsrA	c
ecl8_01018	dmlR_5	HTH-type transcriptional regulator DmlR	c
ecl8_01019	hosA	Transcriptional regulator HosA	c
ecl8_01020	ecdB	putative UbiX-like flavin prenyltransferase	c
ecl8_01021	edcC	Phenolic acid decarboxylase subunit C	c
ecl8_01022	bsdD	Phenolic acid decarboxylase subunit D	c
ecl8_01023	hokA_2	Protein HokA	c
ecl8_01024	mutS	DNA mismatch repair protein MutS	c
ecl8_01025	intA_2	Prophage integrase IntA	c
ecl8_01026	xerC_2	Tyrosine recombinase XerC	c
ecl8_01027	ecl8_01027	hypothetical protein	c
ecl8_01028	ecl8_01028	hypothetical protein	c
ecl8_01029	ecl8_01029	hypothetical protein	c
ecl8_01030	ecl8_01030	hypothetical protein	c
ecl8_01031	ecl8_01031	hypothetical protein	c
ecl8_01032	ecl8_01032	hypothetical protein	c
ecl8_01033	ecl8_01033	hypothetical protein	c
ecl8_01034	ecl8_01034	hypothetical protein	c
ecl8_01035	ftsH_2	ATP-dependent zinc metalloprotease FtsH	c
ecl8_01036	ecl8_01036	hypothetical protein	c
ecl8_01037	ecl8_01037	Adenosine monophosphate-protein transferase NmFic	c
ecl8_01038	hmuV_1	Hemin import ATP-binding protein HmuV	c
ecl8_01039	hmuU_1	Hemin transport system permease protein HmuU	c
ecl8_01040	hmuT_1	Hemin-binding periplasmic protein HmuT	c
ecl8_01041	hemS	Hemin transport protein HemS	c
ecl8_01042	ecl8_01042	putative hemoglobin and hemoglobin-haptoglobin-binding protein 2	c
ecl8_01043	ecl8_01043	hypothetical protein	c
ecl8_01044	ilvI_1	Acetolactate synthase isozyme 3 large subunit	c
ecl8_01045	ecl8_01045	hypothetical protein	c
ecl8_01046	tsaR_1	HTH-type transcriptional regulator TsaR	c
ecl8_01047	ecl8_01047	hypothetical protein	c
ecl8_01048	mntB_1	Manganese transport system membrane protein MntB	c
ecl8_01049	mntB_2	Manganese transport system membrane protein MntB	c
ecl8_01050	fhuC_1	Iron(3+)-hydroxamate import ATP-binding protein FhuC	c
ecl8_01051	hpf_2	Putative metal ABC transporter substrate-binding protein Hpf	c
ecl8_01052	galR_2	HTH-type transcriptional regulator GalR	c
ecl8_01053	mak_1	Fructokinase	c
ecl8_01054	chbA_2	PTS system N,N'-diacetylchitobiose-specific EIIA component	c
ecl8_01055	licC_3	Lichenan permease IIC component	c
ecl8_01056	gmuB	PTS system oligo-beta-mannoside-specific EIIB component	c
ecl8_01057	licC_4	Lichenan permease IIC component	c
ecl8_01058	scrY_1	Sucrose porin	c
ecl8_01059	ecl8_01059	hypothetical protein	c
ecl8_01060	gmuD_2	6-phospho-beta-glucosidase GmuD	c
ecl8_01061	fhlA	Formate hydrogenlyase transcriptional activator	c
ecl8_01062	hypE	Carbamoyl dehydratase HypE	c
ecl8_01063	hypD	Hydrogenase maturation factor HypD	c
ecl8_01064	hypC	Hydrogenase maturation factor HypC	c
ecl8_01065	hypB	Hydrogenase maturation factor HypB	c
ecl8_01066	hypA	Hydrogenase maturation factor HypA	c
ecl8_01067	hycA	Formate hydrogenlyase regulatory protein HycA	c
ecl8_01068	hyfA_1	Hydrogenase-4 component A	c
ecl8_01069	hyfB	Hydrogenase-4 component B	c
ecl8_01070	hycD	Formate hydrogenlyase subunit 4	c
ecl8_01071	hycE	Formate hydrogenlyase subunit 5	c
ecl8_01072	nuoI_1	NADH-quinone oxidoreductase subunit I	c
ecl8_01073	hycG	Formate hydrogenlyase subunit 7	c
ecl8_01074	ecl8_01074	hypothetical protein	c
ecl8_01075	hycI	Hydrogenase 3 maturation protease	c
ecl8_01076	symE	Toxic protein SymE	c
ecl8_01077	bglH_1	Aryl-phospho-beta-D-glucosidase BglH	c
ecl8_01078	bglF_1	PTS system beta-glucoside-specific EIIBCA component	c
ecl8_01079	ascG_3	HTH-type transcriptional regulator AscG	c
ecl8_01080	hyfA_2	Hydrogenase-4 component A	c
ecl8_01081	hypF	Carbamoyltransferase HypF	c
ecl8_01082	hoxN	High-affinity nickel transport protein	c
ecl8_01083	norW	Nitric oxide reductase FlRd-NAD(+) reductase	c
ecl8_01084	norV	Anaerobic nitric oxide reductase flavorubredoxin	c
ecl8_01085	norR	Anaerobic nitric oxide reductase transcription regulator NorR	c
ecl8_01086	gutQ	Arabinose 5-phosphate isomerase GutQ	c
ecl8_01087	srlR_1	Glucitol operon repressor	c
ecl8_01088	ecl8_01088	hypothetical protein	c
ecl8_01089	srlD	Sorbitol-6-phosphate 2-dehydrogenase	c
ecl8_01090	srlB_1	PTS system glucitol/sorbitol-specific EIIA component	c
ecl8_01091	srlE	PTS system glucitol/sorbitol-specific EIIB component	c
ecl8_01092	srlA	PTS system glucitol/sorbitol-specific EIIC component	c
ecl8_01093	mltB	Membrane-bound lytic murein transglycosylase B	c
ecl8_01094	fepC_1	Ferric enterobactin transport ATP-binding protein FepC	c
ecl8_01095	mntB_3	Manganese transport system membrane protein MntB	c
ecl8_01096	mntA	Manganese-binding lipoprotein MntA	c
ecl8_01097	pncC_1	Nicotinamide-nucleotide amidohydrolase PncC	c
ecl8_01098	recA	Protein RecA	c
ecl8_01099	recX	Regulatory protein RecX	c
ecl8_01100	alaS	Alanine--tRNA ligase	c
ecl8_01101	csrA	Carbon storage regulator	c
ecl8_01102	ecl8_01102	tRNA-Ser	c
ecl8_01103	ecl8_01103	tRNA-Arg	c
ecl8_01104	ecl8_01104	tRNA-Arg	c
ecl8_01105	ecl8_01105	tRNA-Arg	c
ecl8_01106	ecl8_01106	tRNA-Arg	c
ecl8_01107	osmY_2	Osmotically-inducible protein Y	c
ecl8_01108	yqaB	Fructose-1-phosphate phosphatase YqaB	c
ecl8_01109	yqaA	Inner membrane protein YqaA	c
ecl8_01110	gshA	Glutamate--cysteine ligase	c
ecl8_01111	luxS	S-ribosylhomocysteine lyase	c
ecl8_01112	nimR_1	HTH-type transcriptional regulator NimR	c
ecl8_01113	leuA_1	2-isopropylmalate synthase	c
ecl8_01114	emrB_1	Multidrug export protein EmrB	c
ecl8_01115	emrA_1	Multidrug export protein EmrA	c
ecl8_01116	mprA	Transcriptional repressor MprA	c
ecl8_01117	ecl8_01117	hypothetical protein	c
ecl8_01118	ygaZ_1	Inner membrane protein YgaZ	c
ecl8_01119	proX	Glycine betaine/proline betaine-binding periplasmic protein	c
ecl8_01120	proW	Glycine betaine/proline betaine transport system permease protein ProW	c
ecl8_01121	proV	Glycine betaine/proline betaine transport system ATP-binding protein ProV	c
ecl8_01122	nrdF	Ribonucleoside-diphosphate reductase 2 subunit beta	c
ecl8_01123	nrdE	Ribonucleoside-diphosphate reductase 2 subunit alpha	c
ecl8_01124	nrdI	Protein NrdI	c
ecl8_01125	nrdH	Glutaredoxin-like protein NrdH	c
ecl8_01126	ahpD_1	Alkyl hydroperoxide reductase AhpD	c
ecl8_01127	gabR_2	HTH-type transcriptional regulatory protein GabR	c
ecl8_01128	ygaM	putative protein YgaM	c
ecl8_01129	ecl8_01129	hypothetical protein	c
ecl8_01130	alaE	L-alanine exporter AlaE	c
ecl8_01131	stpA	DNA-binding protein StpA	c
ecl8_01132	ecl8_01132	hypothetical protein	c
ecl8_01133	ecl8_01133	hypothetical protein	c
ecl8_01134	ygaP	Inner membrane protein YgaP	c
ecl8_01135	ygaV	putative HTH-type transcriptional regulator YgaV	c
ecl8_01136	azoR_1	FMN-dependent NADH-azoreductase	c
ecl8_01137	dmlR_6	HTH-type transcriptional regulator DmlR	c
ecl8_01138	acoR_1	Acetoin catabolism regulatory protein	c
ecl8_01139	acoR_2	Acetoin dehydrogenase operon transcriptional activator AcoR	c
ecl8_01140	ald1	Long-chain-aldehyde dehydrogenase	c
ecl8_01141	fimA_1	Type-1 fimbrial protein, A chain	c
ecl8_01142	yraI_1	putative fimbrial chaperone YraI	c
ecl8_01143	fimD_2	Outer membrane usher protein FimD	c
ecl8_01144	ecl8_01144	hypothetical protein	c
ecl8_01145	lpfB_1	putative fimbrial chaperone LpfB	c
ecl8_01146	fim_2	Fimbrial subunit type 1	c
ecl8_01147	pheC	Cyclohexadienyl dehydratase	c
ecl8_01148	ecl8_01148	hypothetical protein	c
ecl8_01149	fabG_3	3-oxoacyl-[acyl-carrier-protein] reductase FabG	c
ecl8_01150	ghrA_1	Glyoxylate/hydroxypyruvate reductase A	c
ecl8_01151	cloR	4-hydroxy-3-prenylphenylpyruvate oxygenase/4-hydroxy-3-prenylbenzoate synthase	c
ecl8_01152	tcyC	L-cystine import ATP-binding protein TcyC	c
ecl8_01153	artJ_1	ABC transporter arginine-binding protein 1	c
ecl8_01154	efe_1	2-oxoglutarate-dependent ethylene/succinate-forming enzyme	c
ecl8_01155	ecl8_01155	hypothetical protein	c
ecl8_01156	gbuA	Guanidinobutyrase	c
ecl8_01157	cbl_1	HTH-type transcriptional regulator cbl	c
ecl8_01158	nsrR_1	HTH-type transcriptional repressor NsrR	c
ecl8_01159	bepE_1	Efflux pump membrane transporter BepE	c
ecl8_01160	bepF	Efflux pump periplasmic linker BepF	c
ecl8_01161	rob_1	Right origin-binding protein	c
ecl8_01162	ecl8_01162	hypothetical protein	c
ecl8_01163	pgrR_2	HTH-type transcriptional regulator PgrR	c
ecl8_01164	ecl8_01164	hypothetical protein	c
ecl8_01165	ecl8_01165	hypothetical protein	c
ecl8_01166	ecl8_01166	hypothetical protein	c
ecl8_01167	ecl8_01167	hypothetical protein	c
ecl8_01168	ecl8_01168	hypothetical protein	c
ecl8_01169	ecl8_01169	hypothetical protein	c
ecl8_01170	intA_3	Prophage integrase IntA	c
ecl8_01171	ecl8_01171	hypothetical protein	c
ecl8_01172	ssrA	transfer-messenger RNA, SsrA	c
ecl8_01173	smpB	SsrA-binding protein	c
ecl8_01174	ratA	Ribosome association toxin RatA	c
ecl8_01175	ecl8_01175	hypothetical protein	c
ecl8_01176	bamE_1	Outer membrane protein assembly factor BamE	c
ecl8_01177	recN	DNA repair protein RecN	c
ecl8_01178	nadK	NAD kinase	c
ecl8_01179	grpE	Protein GrpE	c
ecl8_01180	ecl8_01180	hypothetical protein	c
ecl8_01181	ypjD	Inner membrane protein YpjD	c
ecl8_01182	ffh	Signal recognition particle protein	c
ecl8_01183	rpsP	30S ribosomal protein S16	c
ecl8_01184	rimM	Ribosome maturation factor RimM	c
ecl8_01185	trmD	tRNA (guanine-N(1)-)-methyltransferase	c
ecl8_01186	rplS	50S ribosomal protein L19	c
ecl8_01187	ecl8_01187	hypothetical protein	c
ecl8_01188	ecl8_01188	hypothetical protein	c
ecl8_01189	ecl8_01189	Outer membrane protein Omp38	c
ecl8_01190	dgcN	Diguanylate cyclase DgcN	c
ecl8_01191	ecl8_01191	hypothetical protein	c
ecl8_01192	aroF	Phospho-2-dehydro-3-deoxyheptonate aldolase, Tyr-sensitive	c
ecl8_01193	tyrA	T-protein	c
ecl8_01194	ecl8_01194	6-deoxy-6-sulfogluconolactonase	c
ecl8_01195	pheA	P-protein	c
ecl8_01196	raiA	Ribosome-associated inhibitor A	c
ecl8_01197	bamD	Outer membrane protein assembly factor BamD	c
ecl8_01198	rluD	Ribosomal large subunit pseudouridine synthase D	c
ecl8_01199	yfiH	Polyphenol oxidase	c
ecl8_01200	clpB	Chaperone protein ClpB	c
ecl8_01201	ecl8_01201	16S ribosomal RNA	c
ecl8_01202	ecl8_01202	tRNA-Glu	c
ecl8_01203	ecl8_01203	23S ribosomal RNA	c
ecl8_01204	ecl8_01204	5S ribosomal RNA	c
ecl8_01205	kgtP_1	Alpha-ketoglutarate permease	c
ecl8_01206	ecl8_01206	hypothetical protein	c
ecl8_01207	pssA	CDP-diacylglycerol--serine O-phosphatidyltransferase	c
ecl8_01208	pat_1	Protein lysine acetyltransferase Pat	c
ecl8_01209	ecl8_01209	hypothetical protein	c
ecl8_01210	trxC	Thioredoxin 2	c
ecl8_01211	yfiF	putative tRNA/rRNA methyltransferase YfiF	c
ecl8_01212	ung	Uracil-DNA glycosylase	c
ecl8_01213	grcA	Autonomous glycyl radical cofactor	c
ecl8_01214	srmB	ATP-dependent RNA helicase SrmB	c
ecl8_01215	yfiC	tRNA1(Val) (adenine(37)-N6)-methyltransferase	c
ecl8_01216	nadB	L-aspartate oxidase	c
ecl8_01217	rpoE	ECF RNA polymerase sigma-E factor	c
ecl8_01218	rseA	Anti-sigma-E factor RseA	c
ecl8_01219	rseB	Sigma-E factor regulatory protein RseB	c
ecl8_01220	rseC	Protein RseC	c
ecl8_01221	lepA	Elongation factor 4	c
ecl8_01222	lepB	Signal peptidase I	c
ecl8_01223	rnc	Ribonuclease 3	c
ecl8_01224	era	GTPase Era	c
ecl8_01225	recO	DNA repair protein RecO	c
ecl8_01226	pdxJ	Pyridoxine 5'-phosphate synthase	c
ecl8_01227	acpS	Holo-[acyl-carrier-protein] synthase	c
ecl8_01228	yfhL	Ferredoxin YfhL	c
ecl8_01229	murR	HTH-type transcriptional regulator MurR	c
ecl8_01230	pgpC	Phosphatidylglycerophosphatase C	c
ecl8_01231	tadA	tRNA-specific adenosine deaminase	c
ecl8_01232	mltF_1	Membrane-bound lytic murein transglycosylase F	c
ecl8_01233	purL	Phosphoribosylformylglycinamidine synthase	c
ecl8_01234	glrK	Sensor histidine kinase GlrK	c
ecl8_01235	qseG	Quorum-sensing regulator protein G	c
ecl8_01236	glrR	Transcriptional regulatory protein GlrR	c
ecl8_01237	glnB	Nitrogen regulatory protein P-II	c
ecl8_01238	hmp	Flavohemoprotein	c
ecl8_01239	glyA1	Serine hydroxymethyltransferase 1	c
ecl8_01240	yphA_1	Inner membrane protein YphA	c
ecl8_01241	yphA_2	Inner membrane protein YphA	c
ecl8_01242	nagC_1	N-acetylglucosamine repressor	c
ecl8_01243	lapB_1	Lipopolysaccharide assembly protein B	c
ecl8_01244	xylE	D-xylose-proton symporter	c
ecl8_01245	yphB	putative protein YphB	c
ecl8_01246	hcaT	putative 3-phenylpropionic acid transporter	c
ecl8_01247	ecl8_01247	hypothetical protein	c
ecl8_01248	ecl8_01248	hypothetical protein	c
ecl8_01249	ecl8_01249	hypothetical protein	c
ecl8_01250	ecl8_01250	hypothetical protein	c
ecl8_01251	suhB_1	Inositol-1-monophosphatase	c
ecl8_01252	trmJ	tRNA (cytidine/uridine-2'-O-)-methyltransferase TrmJ	c
ecl8_01253	iscR	HTH-type transcriptional regulator IscR	c
ecl8_01254	iscS	Cysteine desulfurase IscS	c
ecl8_01255	iscU	Iron-sulfur cluster assembly scaffold protein IscU	c
ecl8_01256	iscA	Iron-binding protein IscA	c
ecl8_01257	hscB	Co-chaperone protein HscB	c
ecl8_01258	hscA	Chaperone protein HscA	c
ecl8_01259	fdx	2Fe-2S ferredoxin	c
ecl8_01260	iscX	Protein IscX	c
ecl8_01261	pepB	Peptidase B	c
ecl8_01262	ecl8_01262	hypothetical protein	c
ecl8_01263	ecl8_01263	hypothetical protein	c
ecl8_01264	ecl8_01264	hypothetical protein	c
ecl8_01265	sseA	3-mercaptopyruvate sulfurtransferase	c
ecl8_01266	yfhM	putative lipoprotein YfhM	c
ecl8_01267	pbpC	Penicillin-binding protein 1C	c
ecl8_01268	ndk	Nucleoside diphosphate kinase	c
ecl8_01269	rlmN	Dual-specificity RNA methyltransferase RlmN	c
ecl8_01270	rodZ	Cytoskeleton protein RodZ	c
ecl8_01271	ispG	4-hydroxy-3-methylbut-2-en-1-yl diphosphate synthase (flavodoxin)	c
ecl8_01272	hisS	Histidine--tRNA ligase	c
ecl8_01273	ecl8_01273	hypothetical protein	c
ecl8_01274	bamB	Outer membrane protein assembly factor BamB	c
ecl8_01275	der	GTPase Der	c
ecl8_01276	ecl8_01276	hypothetical protein	c
ecl8_01277	yfgJ	putative protein YfgJ	c
ecl8_01278	xseA	Exodeoxyribonuclease 7 large subunit	c
ecl8_01279	guaB	Inosine-5'-monophosphate dehydrogenase	c
ecl8_01280	guaA	GMP synthase [glutamine-hydrolyzing]	c
ecl8_01281	betC	Choline-sulfatase	c
ecl8_01282	chuR_2	Anaerobic sulfatase-maturating enzyme	c
ecl8_01283	ecl8_01283	hypothetical protein	c
ecl8_01284	yofA_1	HTH-type transcriptional regulator YofA	c
ecl8_01285	ecl8_01285	hypothetical protein	c
ecl8_01286	pdeF	Cyclic di-GMP phosphodiesterase PdeF	c
ecl8_01287	ppx	Exopolyphosphatase	c
ecl8_01288	ppk	Polyphosphate kinase	c
ecl8_01289	purN	Phosphoribosylglycinamide formyltransferase	c
ecl8_01290	purM	Phosphoribosylformylglycinamidine cyclo-ligase	c
ecl8_01291	bglK	Beta-glucoside kinase	c
ecl8_01292	bglA_2	6-phospho-beta-glucosidase BglA	c
ecl8_01293	upp	Uracil phosphoribosyltransferase	c
ecl8_01294	uraA	Uracil permease	c
ecl8_01295	hda	DnaA regulatory inactivator Hda	c
ecl8_01296	rpnA_1	Recombination-promoting nuclease RpnA	c
ecl8_01297	yfgD	putative protein YfgD	c
ecl8_01298	bepA	Beta-barrel assembly-enhancing protease	c
ecl8_01299	yhhT_2	Putative transport protein YhhT	c
ecl8_01300	bcp	Peroxiredoxin Bcp	c
ecl8_01301	gcvR	Glycine cleavage system transcriptional repressor	c
ecl8_01302	dapA_1	4-hydroxy-tetrahydrodipicolinate synthase	c
ecl8_01303	bamC	Outer membrane protein assembly factor BamC	c
ecl8_01304	purC	Phosphoribosylaminoimidazole-succinocarboxamide synthase	c
ecl8_01305	ecl8_01305	hypothetical protein	c
ecl8_01306	tmcA	tRNA(Met) cytidine acetyltransferase TmcA	c
ecl8_01307	ecl8_01307	hypothetical protein	c
ecl8_01308	ecl8_01308	hypothetical protein	c
ecl8_01309	dapE	Succinyl-diaminopimelate desuccinylase	c
ecl8_01310	yffB	Protein YffB	c
ecl8_01311	acrB_1	Multidrug efflux pump subunit AcrB	c
ecl8_01312	gltD_2	Glutamate synthase [NADPH] small chain	c
ecl8_01313	nudK_1	GDP-mannose pyrophosphatase NudK	c
ecl8_01314	ecl8_01314	hypothetical protein	c
ecl8_01315	tktB	Transketolase 2	c
ecl8_01316	tal	Transaldolase	c
ecl8_01317	maeB	NADP-dependent malic enzyme	c
ecl8_01318	eutS	Ethanolamine utilization protein EutS	c
ecl8_01319	pduV_2	Propanediol utilization protein PduV	c
ecl8_01320	eutQ	Ethanolamine utilization protein EutQ	c
ecl8_01321	ecl8_01321	hypothetical protein	c
ecl8_01322	eutD	Ethanolamine utilization protein EutD	c
ecl8_01323	eutM	Ethanolamine utilization protein EutM	c
ecl8_01324	eutN	Ethanolamine utilization protein EutN	c
ecl8_01325	adhE_3	Aldehyde-alcohol dehydrogenase	c
ecl8_01326	ftsA_1	Cell division protein FtsA	c
ecl8_01327	mdh_2	NAD-dependent methanol dehydrogenase	c
ecl8_01328	ecl8_01328	hypothetical protein	c
ecl8_01329	ecl8_01329	hypothetical protein	c
ecl8_01330	eutB_1	Ethanolamine ammonia-lyase heavy chain	c
ecl8_01331	eutC_1	Ethanolamine ammonia-lyase light chain	c
ecl8_01332	eutL	Ethanolamine utilization protein EutL	c
ecl8_01333	eutK	Ethanolamine utilization protein EutK	c
ecl8_01334	ecl8_01334	hypothetical protein	c
ecl8_01335	hemF	Oxygen-dependent coproporphyrinogen-III oxidase	c
ecl8_01336	amiA	N-acetylmuramoyl-L-alanine amidase AmiA	c
ecl8_01337	ypeA	Acetyltransferase YpeA	c
ecl8_01338	yfeZ	Inner membrane protein YfeZ	c
ecl8_01339	yfeY	putative protein YfeY	c
ecl8_01340	yfeX	putative deferrochelatase/peroxidase YfeX	c
ecl8_01341	cysP	Thiosulfate-binding protein	c
ecl8_01342	cysT	Sulfate transport system permease protein CysT	c
ecl8_01343	cysW_1	Sulfate transport system permease protein CysW	c
ecl8_01344	cysA_1	Sulfate/thiosulfate import ATP-binding protein CysA	c
ecl8_01345	cysM	Cysteine synthase B	c
ecl8_01346	yybH	putative protein YybH	c
ecl8_01347	ptsJ_1	Vitamin B6 salvage pathway transcriptional repressor PtsJ	c
ecl8_01348	pdxK	Pyridoxine/pyridoxal/pyridoxamine kinase	c
ecl8_01349	ecl8_01349	hypothetical protein	c
ecl8_01350	crr	PTS system glucose-specific EIIA component	c
ecl8_01351	ptsI	Phosphoenolpyruvate-protein phosphotransferase	c
ecl8_01352	ptsH	Phosphocarrier protein HPr	c
ecl8_01353	cysK	Cysteine synthase A	c
ecl8_01354	cysZ	Sulfate transporter CysZ	c
ecl8_01355	zipA	Cell division protein ZipA	c
ecl8_01356	ligA	DNA ligase	c
ecl8_01357	ecl8_01357	hypothetical protein	c
ecl8_01358	ecl8_01358	hypothetical protein	c
ecl8_01359	cynR_1	HTH-type transcriptional regulator CynR	c
ecl8_01360	ecl8_01360	tRNA-Lys	c
ecl8_01361	ecl8_01361	tRNA-Val	c
ecl8_01362	ecl8_01362	tRNA-Val	c
ecl8_01363	ecl8_01363	tRNA-Val	c
ecl8_01364	gltX	Glutamate--tRNA ligase	c
ecl8_01365	ecl8_01365	hypothetical protein	c
ecl8_01366	ecl8_01366	hypothetical protein	c
ecl8_01367	ecl8_01367	tRNA-Ala	c
ecl8_01368	ecl8_01368	tRNA-Ala	c
ecl8_01369	pdeA	putative cyclic di-GMP phosphodiesterase PdeA	c
ecl8_01370	nupC_1	Nucleoside permease NupC	c
ecl8_01371	mntH	Divalent metal cation transporter MntH	c
ecl8_01372	ecl8_01372	hypothetical protein	c
ecl8_01373	gpr	L-glyceraldehyde 3-phosphate reductase	c
ecl8_01374	ipdC	Indole-3-pyruvate decarboxylase	c
ecl8_01375	yfeO	Putative ion-transport protein YfeO	c
ecl8_01376	glk	Glucokinase	c
ecl8_01377	ypdB	Transcriptional regulatory protein YpdB	c
ecl8_01378	ypdA	Sensor histidine kinase YpdA	c
ecl8_01379	alaC	Glutamate-pyruvate aminotransferase AlaC	c
ecl8_01380	yycB	putative transporter YycB	c
ecl8_01381	guaD_1	Guanine deaminase	c
ecl8_01382	cynR_2	HTH-type transcriptional regulator CynR	c
ecl8_01383	ecl8_01383	hypothetical protein	c
ecl8_01384	ecl8_01384	hypothetical protein	c
ecl8_01385	ecl8_01385	tRNA-Arg	c
ecl8_01386	intA_4	Prophage integrase IntA	c
ecl8_01387	ecl8_01387	hypothetical protein	c
ecl8_01388	ecl8_01388	hypothetical protein	c
ecl8_01389	ecl8_01389	hypothetical protein	c
ecl8_01390	ecl8_01390	hypothetical protein	c
ecl8_01391	ecl8_01391	hypothetical protein	c
ecl8_01392	ecl8_01392	hypothetical protein	c
ecl8_01393	ecl8_01393	hypothetical protein	c
ecl8_01394	rdgC_1	Recombination-associated protein RdgC	c
ecl8_01395	lexA_1	LexA repressor	c
ecl8_01396	ecl8_01396	hypothetical protein	c
ecl8_01397	ecl8_01397	hypothetical protein	c
ecl8_01398	dam_2	DNA adenine methylase	c
ecl8_01399	rusA	Crossover junction endodeoxyribonuclease RusA	c
ecl8_01400	ecl8_01400	hypothetical protein	c
ecl8_01401	ecl8_01401	hypothetical protein	c
ecl8_01402	ecl8_01402	tRNA-Thr	c
ecl8_01403	ecl8_01403	hypothetical protein	c
ecl8_01404	ecl8_01404	hypothetical protein	c
ecl8_01405	ecl8_01405	hypothetical protein	c
ecl8_01406	ecl8_01406	hypothetical protein	c
ecl8_01407	ecl8_01407	hypothetical protein	c
ecl8_01408	ecl8_01408	hypothetical protein	c
ecl8_01409	ecl8_01409	hypothetical protein	c
ecl8_01410	ecl8_01410	hypothetical protein	c
ecl8_01411	ecl8_01411	hypothetical protein	c
ecl8_01412	ecl8_01412	hypothetical protein	c
ecl8_01413	ecl8_01413	hypothetical protein	c
ecl8_01414	ecl8_01414	hypothetical protein	c
ecl8_01415	ecl8_01415	hypothetical protein	c
ecl8_01416	ecl8_01416	hypothetical protein	c
ecl8_01417	ecl8_01417	hypothetical protein	c
ecl8_01418	ecl8_01418	hypothetical protein	c
ecl8_01419	ecl8_01419	hypothetical protein	c
ecl8_01420	ecl8_01420	hypothetical protein	c
ecl8_01421	ecl8_01421	hypothetical protein	c
ecl8_01422	ecl8_01422	hypothetical protein	c
ecl8_01423	ecl8_01423	hypothetical protein	c
ecl8_01424	ecl8_01424	hypothetical protein	c
ecl8_01425	ecl8_01425	hypothetical protein	c
ecl8_01426	ecl8_01426	hypothetical protein	c
ecl8_01427	bamE_2	Outer membrane protein assembly factor BamE	c
ecl8_01428	ecl8_01428	hypothetical protein	c
ecl8_01429	ecl8_01429	hypothetical protein	c
ecl8_01430	ecl8_01430	hypothetical protein	c
ecl8_01431	ecl8_01431	hypothetical protein	c
ecl8_01432	ecl8_01432	hypothetical protein	c
ecl8_01433	ecl8_01433	hypothetical protein	c
ecl8_01434	ecl8_01434	hypothetical protein	c
ecl8_01435	ecl8_01435	hypothetical protein	c
ecl8_01436	ecl8_01436	hypothetical protein	c
ecl8_01437	ecl8_01437	hypothetical protein	c
ecl8_01438	ecl8_01438	hypothetical protein	c
ecl8_01439	yfdC	Inner membrane protein YfdC	c
ecl8_01440	mlaA	putative phospholipid-binding lipoprotein MlaA	c
ecl8_01441	fadL	Long-chain fatty acid transport protein	c
ecl8_01442	ecl8_01442	hypothetical protein	c
ecl8_01443	fadI	3-ketoacyl-CoA thiolase FadI	c
ecl8_01444	fadJ	Fatty acid oxidation complex subunit alpha	c
ecl8_01445	sixA	Phosphohistidine phosphatase SixA	c
ecl8_01446	smrA_1	putative DNA endonuclease SmrA	c
ecl8_01447	prmB	50S ribosomal protein L3 glutamine methyltransferase	c
ecl8_01448	aroC	Chorismate synthase	c
ecl8_01449	mepA	Penicillin-insensitive murein endopeptidase	c
ecl8_01450	yfcA	putative membrane transporter protein YfcA	c
ecl8_01451	epmC	Elongation factor P hydroxylase	c
ecl8_01452	ecl8_01452	hypothetical protein	c
ecl8_01453	mnmC	tRNA 5-methylaminomethyl-2-thiouridine biosynthesis bifunctional protein MnmC	c
ecl8_01454	fabB	3-oxoacyl-[acyl-carrier-protein] synthase 1	c
ecl8_01455	yfcJ	putative MFS-type transporter YfcJ	c
ecl8_01456	flk	Flagellar regulator flk	c
ecl8_01457	pdxB	Erythronate-4-phosphate dehydrogenase	c
ecl8_01458	usg	USG-1 protein	c
ecl8_01459	truA	tRNA pseudouridine synthase A	c
ecl8_01460	dedA	Protein DedA	c
ecl8_01461	accD	Acetyl-coenzyme A carboxylase carboxyl transferase subunit beta	c
ecl8_01462	folC	Dihydrofolate synthase/folylpolyglutamate synthase	c
ecl8_01463	dedD	Cell division protein DedD	c
ecl8_01464	cvpA	Colicin V production protein	c
ecl8_01465	purF	Amidophosphoribosyltransferase	c
ecl8_01466	ubiX	Flavin prenyltransferase UbiX	c
ecl8_01467	argT	Lysine/arginine/ornithine-binding periplasmic protein	c
ecl8_01468	hisJ_1	Histidine-binding periplasmic protein	c
ecl8_01469	hisQ_1	Histidine transport system permease protein HisQ	c
ecl8_01470	hisM	Histidine transport system permease protein HisM	c
ecl8_01471	hisP	Histidine transport ATP-binding protein HisP	c
ecl8_01472	ecl8_01472	hypothetical protein	c
ecl8_01473	ecl8_01473	Epimerase family protein	c
ecl8_01474	folX	Dihydroneopterin triphosphate 2'-epimerase	c
ecl8_01475	yfcG_1	Disulfide-bond oxidoreductase YfcG	c
ecl8_01476	yfcF	Glutathione S-transferase YfcF	c
ecl8_01477	yfcE	Phosphodiesterase YfcE	c
ecl8_01478	yfcD	putative Nudix hydrolase YfcD	c
ecl8_01479	pta	Phosphate acetyltransferase	c
ecl8_01480	ackA	Acetate kinase	c
ecl8_01481	ecl8_01481	hypothetical protein	c
ecl8_01482	ecl8_01482	hypothetical protein	c
ecl8_01483	hxpA	Hexitol phosphatase A	c
ecl8_01484	sdcS	Sodium-dependent dicarboxylate transporter SdcS	c
ecl8_01485	yfbR	5'-deoxynucleotidase YfbR	c
ecl8_01486	alaA	Glutamate-pyruvate aminotransferase AlaA	c
ecl8_01487	cmpR_1	HTH-type transcriptional activator CmpR	c
ecl8_01488	ndhC	NAD(P)H-quinone oxidoreductase subunit 3	c
ecl8_01489	nuoB	NADH-quinone oxidoreductase subunit B	c
ecl8_01490	nuoC	NADH-quinone oxidoreductase subunit C/D	c
ecl8_01491	nuoE	NADH-quinone oxidoreductase subunit E	c
ecl8_01492	nuoF	NADH-quinone oxidoreductase subunit F	c
ecl8_01493	nuoG	NADH-quinone oxidoreductase subunit G	c
ecl8_01494	nuoH	NADH-quinone oxidoreductase subunit H	c
ecl8_01495	nuoI_2	NADH-quinone oxidoreductase subunit I	c
ecl8_01496	nuoJ	NADH-quinone oxidoreductase subunit J	c
ecl8_01497	nuoK	NADH-quinone oxidoreductase subunit K	c
ecl8_01498	nuoL	NADH-quinone oxidoreductase subunit L	c
ecl8_01499	nuoM	NADH-quinone oxidoreductase subunit M	c
ecl8_01500	nuoN	NADH-quinone oxidoreductase subunit N	c
ecl8_01501	rbn_1	Ribonuclease BN	c
ecl8_01502	ecl8_01502	hypothetical protein	c
ecl8_01503	menF	Isochorismate synthase MenF	c
ecl8_01504	menD	2-succinyl-5-enolpyruvyl-6-hydroxy-3- cyclohexene-1-carboxylate synthase	c
ecl8_01505	menH	2-succinyl-6-hydroxy-2, 4-cyclohexadiene-1-carboxylate synthase	c
ecl8_01506	menB	1,4-dihydroxy-2-naphthoyl-CoA synthase	c
ecl8_01507	menC	o-succinylbenzoate synthase	c
ecl8_01508	menE	2-succinylbenzoate--CoA ligase	c
ecl8_01509	nudI	Nucleoside triphosphatase NudI	c
ecl8_01510	rpnA_2	Recombination-promoting nuclease RpnA	c
ecl8_01511	ecl8_01511	hypothetical protein	c
ecl8_01512	pncC_2	Nicotinamide-nucleotide amidohydrolase PncC	c
ecl8_01513	rhmR	putative HTH-type transcriptional regulator RhmR	c
ecl8_01514	rhmD	L-rhamnonate dehydratase	c
ecl8_01515	rhmT_1	Inner membrane transport protein RhmT	c
ecl8_01516	rhmT_2	Inner membrane transport protein RhmT	c
ecl8_01517	rhmA	2-keto-3-deoxy-L-rhamnonate aldolase	c
ecl8_01518	glpC	Anaerobic glycerol-3-phosphate dehydrogenase subunit C	c
ecl8_01519	glpB	Anaerobic glycerol-3-phosphate dehydrogenase subunit B	c
ecl8_01520	glpA	Anaerobic glycerol-3-phosphate dehydrogenase subunit A	c
ecl8_01521	glpT_1	Glycerol-3-phosphate transporter	c
ecl8_01522	glpQ	Glycerophosphodiester phosphodiesterase, periplasmic	c
ecl8_01523	ascD	CDP-6-deoxy-L-threo-D-glycero-4-hexulose-3- dehydrase reductase	c
ecl8_01524	nrdB	Ribonucleoside-diphosphate reductase 1 subunit beta	c
ecl8_01525	nrdA	Ribonucleoside-diphosphate reductase 1 subunit alpha	c
ecl8_01526	ubiG	Ubiquinone biosynthesis O-methyltransferase	c
ecl8_01527	gyrA	DNA gyrase subunit A	c
ecl8_01528	atoB	Acetyl-CoA acetyltransferase	c
ecl8_01529	atoE	Putative short-chain fatty acid transporter	c
ecl8_01530	atoA	Acetate CoA-transferase subunit beta	c
ecl8_01531	atoD	Acetate CoA-transferase subunit alpha	c
ecl8_01532	atoC	Regulatory protein AtoC	c
ecl8_01533	atoS	Signal transduction histidine-protein kinase AtoS	c
ecl8_01534	rcsC	Sensor histidine kinase RcsC	c
ecl8_01535	rcsB	Transcriptional regulatory protein RcsB	c
ecl8_01536	rcsD	Phosphotransferase RcsD	c
ecl8_01537	ompC	Outer membrane protein C	c
ecl8_01538	apbE_1	FAD:protein FMN transferase	c
ecl8_01539	ada_2	Bifunctional transcriptional activator/DNA repair enzyme Ada	c
ecl8_01540	alkB	Alpha-ketoglutarate-dependent dioxygenase AlkB	c
ecl8_01541	yojI	ABC transporter ATP-binding/permease protein YojI	c
ecl8_01542	ecl8_01542	Magnesium transporter MgtE	c
ecl8_01543	bicA	Bicarbonate transporter BicA	c
ecl8_01544	mqo_1	Malate:quinone oxidoreductase	c
ecl8_01545	eco	Ecotin	c
ecl8_01546	ecl8_01546	Putative transport protein	c
ecl8_01547	ecl8_01547	tRNA-Pro	c
ecl8_01548	yejM	Inner membrane protein YejM	c
ecl8_01549	ecl8_01549	hypothetical protein	c
ecl8_01550	yejK	Nucleoid-associated protein YejK	c
ecl8_01551	glcR_1	HTH-type transcriptional repressor GlcR	c
ecl8_01552	nudK_2	GDP-mannose pyrophosphatase NudK	c
ecl8_01553	nylB	6-aminohexanoate-dimer hydrolase	c
ecl8_01554	allS_2	HTH-type transcriptional activator AllS	c
ecl8_01555	rplY	50S ribosomal protein L25	c
ecl8_01556	radD	Putative DNA repair helicase RadD	c
ecl8_01557	rsuA	Ribosomal small subunit pseudouridine synthase A	c
ecl8_01558	bcr_2	Bicyclomycin resistance protein	c
ecl8_01559	yejG	putative protein YejG	c
ecl8_01560	yejF_2	putative ABC transporter ATP-binding protein YejF	c
ecl8_01561	yejE	Inner membrane ABC transporter permease protein YejE	c
ecl8_01562	yejB	Inner membrane ABC transporter permease protein YejB	c
ecl8_01563	appA_2	Oligopeptide-binding protein AppA	c
ecl8_01564	pdeN	putative cyclic di-GMP phosphodiesterase PdeN	c
ecl8_01565	mepS_1	Murein DD-endopeptidase MepS/Murein LD-carboxypeptidase	c
ecl8_01566	lpxT	Lipid A 1-diphosphate synthase	c
ecl8_01567	yeiR	Zinc-binding GTPase YeiR	c
ecl8_01568	por_1	Polyol:NADP oxidoreductase	c
ecl8_01569	uxuA_2	Mannonate dehydratase	c
ecl8_01570	yeiP	Elongation factor P-like protein	c
ecl8_01571	ecl8_01571	hypothetical protein	c
ecl8_01572	setB	Sugar efflux transporter B	c
ecl8_01573	fruB_1	Multiphosphoryl transfer protein	c
ecl8_01574	lacC	Tagatose-6-phosphate kinase	c
ecl8_01575	fruA_1	PTS system fructose-specific EIIB'BC component	c
ecl8_01576	nfo	Endonuclease 4	c
ecl8_01577	ecl8_01577	hypothetical protein	c
ecl8_01578	cmpR_2	HTH-type transcriptional activator CmpR	c
ecl8_01579	lysP	Lysine-specific permease	c
ecl8_01580	ecl8_01580	hypothetical protein	c
ecl8_01581	ecl8_01581	hypothetical protein	c
ecl8_01582	cirA	Colicin I receptor	c
ecl8_01583	yeiG	S-formylglutathione hydrolase YeiG	c
ecl8_01584	folE	GTP cyclohydrolase 1	c
ecl8_01585	ecl8_01585	hypothetical protein	c
ecl8_01586	galS	HTH-type transcriptional regulator GalS	c
ecl8_01587	mglB	D-galactose-binding periplasmic protein	c
ecl8_01588	mglA_1	Galactose/methyl galactoside import ATP-binding protein MglA	c
ecl8_01589	mglC	Galactoside transport system permease protein MglC	c
ecl8_01590	ecl8_01590	hypothetical protein	c
ecl8_01591	cdd	Cytidine deaminase	c
ecl8_01592	yohK_1	Inner membrane protein YohK	c
ecl8_01593	ecl8_01593	hypothetical protein	c
ecl8_01594	dusC	tRNA-dihydrouridine(16) synthase	c
ecl8_01595	oprB	Porin B	c
ecl8_01596	bglG	Cryptic beta-glucoside bgl operon antiterminator	c
ecl8_01597	bglF_2	PTS system beta-glucoside-specific EIIBCA component	c
ecl8_01598	bglB	6-phospho-beta-glucosidase BglB	c
ecl8_01599	oprM_2	Outer membrane protein OprM	c
ecl8_01600	yohD	Inner membrane protein YohD	c
ecl8_01601	yohC	Inner membrane protein YohC	c
ecl8_01602	pbpG	D-alanyl-D-alanine endopeptidase	c
ecl8_01603	pat_2	Phosphinothricin N-acetyltransferase	c
ecl8_01604	dld	Quinone-dependent D-lactate dehydrogenase	c
ecl8_01605	ecl8_01605	Beta-glucosidase BoGH3B	c
ecl8_01606	yehZ	Glycine betaine-binding protein YehZ	c
ecl8_01607	yehY	Glycine betaine uptake system permease protein YehY	c
ecl8_01608	yehX	Glycine betaine uptake system ATP-binding protein YehX	c
ecl8_01609	yehW	Glycine betaine uptake system permease protein YehW	c
ecl8_01610	ecl8_01610	hypothetical protein	c
ecl8_01611	btsS	Sensor histidine kinase BtsS	c
ecl8_01612	btsR	Transcriptional regulatory protein BtsR	c
ecl8_01613	ecl8_01613	hypothetical protein	c
ecl8_01614	metG	Methionine--tRNA ligase	c
ecl8_01615	apbC	Iron-sulfur cluster carrier protein	c
ecl8_01616	yafP_1	putative N-acetyltransferase YafP	c
ecl8_01617	rcnB_1	Nickel/cobalt homeostasis protein RcnB	c
ecl8_01618	dmlR_7	HTH-type transcriptional regulator DmlR	c
ecl8_01619	adeQ	Adenine permease AdeQ	c
ecl8_01620	ade2	Adenine deaminase 2	c
ecl8_01621	oxyR_1	Hydrogen peroxide-inducible genes activator	c
ecl8_01622	uspA_2	Universal stress protein A	c
ecl8_01623	thiM	Hydroxyethylthiazole kinase	c
ecl8_01624	thiD	Hydroxymethylpyrimidine/phosphomethylpyrimidine kinase	c
ecl8_01625	fbaB	Fructose-bisphosphate aldolase class 1	c
ecl8_01626	csbX_1	Alpha-ketoglutarate permease	c
ecl8_01627	araB_1	Ribulokinase	c
ecl8_01628	rbtD	Ribitol 2-dehydrogenase	c
ecl8_01629	degA	HTH-type transcriptional regulator DegA	c
ecl8_01630	lsrR_2	Transcriptional regulator LsrR	c
ecl8_01631	mtlK	Mannitol 2-dehydrogenase	c
ecl8_01632	xylB_2	Xylulose kinase	c
ecl8_01633	xylB_3	Xylulose kinase	c
ecl8_01634	csbX_2	Alpha-ketoglutarate permease	c
ecl8_01635	hxpB_1	Hexitol phosphatase B	c
ecl8_01636	gci	D-galactarolactone cycloisomerase	c
ecl8_01637	ddpA_1	putative D,D-dipeptide-binding periplasmic protein DdpA	c
ecl8_01638	ddpB	putative D,D-dipeptide transport system permease protein DdpB	c
ecl8_01639	ddpC_2	putative D,D-dipeptide transport system permease protein DdpC	c
ecl8_01640	oppD_2	Oligopeptide transport ATP-binding protein OppD	c
ecl8_01641	oppF_2	Oligopeptide transport ATP-binding protein OppF	c
ecl8_01642	yegS	putative lipid kinase YegS	c
ecl8_01643	ydcP_1	putative protease YdcP	c
ecl8_01644	baeR	Transcriptional regulatory protein BaeR	c
ecl8_01645	baeS	Signal transduction histidine-protein kinase BaeS	c
ecl8_01646	mdtD	Putative multidrug resistance protein MdtD	c
ecl8_01647	mdtC	Multidrug resistance protein MdtC	c
ecl8_01648	mdtB	Multidrug resistance protein MdtB	c
ecl8_01649	mdtA_1	Multidrug resistance protein MdtA	c
ecl8_01650	dctA_2	C4-dicarboxylate transport protein	c
ecl8_01651	ecl8_01651	hypothetical protein	c
ecl8_01652	ecl8_01652	hypothetical protein	c
ecl8_01653	phoP_1	Virulence transcriptional regulatory protein PhoP	c
ecl8_01654	walK	Sensor histidine kinase WalK	c
ecl8_01655	dnaK_1	Chaperone protein DnaK	c
ecl8_01656	alkA	DNA-3-methyladenine glycosylase 2	c
ecl8_01657	udk	Uridine kinase	c
ecl8_01658	dcd	dCTP deaminase	c
ecl8_01659	ecl8_01659	hypothetical protein	c
ecl8_01660	ecl8_01660	hypothetical protein	c
ecl8_01661	galF	UTP--glucose-1-phosphate uridylyltransferase	c
ecl8_01662	ecl8_01662	hypothetical protein	c
ecl8_01663	ecl8_01663	hypothetical protein	c
ecl8_01664	ecl8_01664	hypothetical protein	c
ecl8_01665	ecl8_01665	Putative tyrosine-protein kinase in cps region	c
ecl8_01666	kanF	2-deoxystreptamine glucosyltransferase	c
ecl8_01667	ecl8_01667	hypothetical protein	c
ecl8_01668	ecl8_01668	hypothetical protein	c
ecl8_01669	ecl8_01669	hypothetical protein	c
ecl8_01670	wzxC	Lipopolysaccharide biosynthesis protein WzxC	c
ecl8_01671	ecl8_01671	hypothetical protein	c
ecl8_01672	oatWY	Polysialic acid O-acetyltransferase	c
ecl8_01673	wcaJ	UDP-glucose:undecaprenyl-phosphate glucose-1-phosphate transferase	c
ecl8_01674	gnd	6-phosphogluconate dehydrogenase, decarboxylating	c
ecl8_01675	manC1	Mannose-1-phosphate guanylyltransferase 1	c
ecl8_01676	algC	Phosphomannomutase/phosphoglucomutase	c
ecl8_01677	ugd	UDP-glucose 6-dehydrogenase	c
ecl8_01678	wbgU	UDP-N-acetylglucosamine 4-epimerase	c
ecl8_01679	tagG	Teichoic acid translocation permease protein TagG	c
ecl8_01680	tagH	Teichoic acids export ATP-binding protein TagH	c
ecl8_01681	gspA	General stress protein A	c
ecl8_01682	rfbD	UDP-galactopyranose mutase	c
ecl8_01683	ecl8_01683	hypothetical protein	c
ecl8_01684	pglA	N, N'-diacetylbacillosaminyl-diphospho-undecaprenol alpha-1,3-N-acetylgalactosaminyltransferase	c
ecl8_01685	epsJ_3	putative glycosyltransferase EpsJ	c
ecl8_01686	ecl8_01686	hypothetical protein	c
ecl8_01687	ykoT	putative glycosyltransferase YkoT	c
ecl8_01688	ecl8_01688	hypothetical protein	c
ecl8_01689	hisI_1	Phosphoribosyl-AMP cyclohydrolase	c
ecl8_01690	hisF	Imidazole glycerol phosphate synthase subunit HisF	c
ecl8_01691	hisA	1-(5-phosphoribosyl)-5-[(5- phosphoribosylamino)methylideneamino] imidazole-4-carboxamide isomerase	c
ecl8_01692	hisH	Imidazole glycerol phosphate synthase subunit HisH	c
ecl8_01693	hisB	Histidine biosynthesis bifunctional protein HisB	c
ecl8_01694	hisC	Histidinol-phosphate aminotransferase	c
ecl8_01695	hisD	Histidinol dehydrogenase	c
ecl8_01696	hisG	ATP phosphoribosyltransferase	c
ecl8_01697	yeeZ	Protein YeeZ	c
ecl8_01698	yhaJ_2	HTH-type transcriptional regulator YhaJ	c
ecl8_01699	plaP	Low-affinity putrescine importer PlaP	c
ecl8_01700	ecl8_01700	hypothetical protein	c
ecl8_01701	fusA_2	Elongation factor G	c
ecl8_01702	sbcB	Exodeoxyribonuclease I	c
ecl8_01703	dacD	D-alanyl-D-alanine carboxypeptidase DacD	c
ecl8_01704	sbmC	DNA gyrase inhibitor	c
ecl8_01705	yeeA	Inner membrane protein YeeA	c
ecl8_01706	ecl8_01706	hypothetical protein	c
ecl8_01707	cobS	Adenosylcobinamide-GDP ribazoletransferase	c
ecl8_01708	cobT_2	Nicotinate-nucleotide--dimethylbenzimidazole phosphoribosyltransferase	c
ecl8_01709	cobT_3	Nicotinate-nucleotide--dimethylbenzimidazole phosphoribosyltransferase	c
ecl8_01710	ahcY	Adenosylhomocysteinase	c
ecl8_01711	ecl8_01711	hypothetical protein	c
ecl8_01712	ecl8_01712	hypothetical protein	c
ecl8_01713	dmlR_8	HTH-type transcriptional regulator DmlR	c
ecl8_01714	ecl8_01714	hypothetical protein	c
ecl8_01715	yhjE_2	Inner membrane metabolite transport protein YhjE	c
ecl8_01716	ecl8_01716	hypothetical protein	c
ecl8_01717	ecl8_01717	hypothetical protein	c
ecl8_01718	ecl8_01718	hypothetical protein	c
ecl8_01719	ecl8_01719	putative signaling protein	c
ecl8_01720	yeaR_1	putative protein YeaR	c
ecl8_01721	yoaG	Protein YoaG	c
ecl8_01722	gcvA_2	Glycine cleavage system transcriptional activator	c
ecl8_01723	ecl8_01723	hypothetical protein	c
ecl8_01724	cpo	Non-heme chloroperoxidase	c
ecl8_01725	dgcP_1	Diguanylate cyclase DgcP	c
ecl8_01726	ecl8_01726	hypothetical protein	c
ecl8_01727	ecl8_01727	hypothetical protein	c
ecl8_01728	ecl8_01728	hypothetical protein	c
ecl8_01729	nimR_2	HTH-type transcriptional regulator NimR	c
ecl8_01730	aaeB_2	p-hydroxybenzoic acid efflux pump subunit AaeB	c
ecl8_01731	ecl8_01731	hypothetical protein	c
ecl8_01732	aaeA_2	p-hydroxybenzoic acid efflux pump subunit AaeA	c
ecl8_01733	ecl8_01733	hypothetical protein	c
ecl8_01734	ecl8_01734	hypothetical protein	c
ecl8_01735	ecl8_01735	hypothetical protein	c
ecl8_01736	fabG_4	3-oxoacyl-[acyl-carrier-protein] reductase FabG	c
ecl8_01737	ecl8_01737	putative transporter	c
ecl8_01738	ecl8_01738	Putative HTH-type transcriptional regulator	c
ecl8_01739	mdtJ_1	Spermidine export protein MdtJ	c
ecl8_01740	ecl8_01740	Putative 2-dehydropantoate 2-reductase	c
ecl8_01741	ecl8_01741	hypothetical protein	c
ecl8_01742	intA_5	Prophage integrase IntA	c
ecl8_01743	ecl8_01743	tRNA-Asn	c
ecl8_01744	yeeO	putative FMN/FAD exporter YeeO	c
ecl8_01745	ecl8_01745	tRNA-Asn	c
ecl8_01746	amn	AMP nucleosidase	c
ecl8_01747	pmrD	Signal transduction protein PmrD	c
ecl8_01748	ecl8_01748	Thermostable monoacylglycerol lipase	c
ecl8_01749	ecl8_01749	hypothetical protein	c
ecl8_01750	acuI	putative acrylyl-CoA reductase AcuI	c
ecl8_01751	acuR	Transcriptional regulator AcuR	c
ecl8_01752	nhaK_1	Sodium, potassium, lithium and rubidium/H(+) antiporter	c
ecl8_01753	ecl8_01753	tRNA-Asn	c
ecl8_01754	oxyR_2	Hydrogen peroxide-inducible genes activator	c
ecl8_01755	cbl_2	HTH-type transcriptional regulator cbl	c
ecl8_01756	erfK	putative L,D-transpeptidase ErfK/SrfK	c
ecl8_01757	pgrR_3	HTH-type transcriptional regulator PgrR	c
ecl8_01758	ecl8_01758	tRNA-Asn	c
ecl8_01759	mtfA	Protein MtfA	c
ecl8_01760	ecl8_01760	tRNA-Ser	c
ecl8_01761	ompN_1	Outer membrane protein N	c
ecl8_01762	yedR	Inner membrane protein YedR	c
ecl8_01763	yedJ	putative protein YedJ	c
ecl8_01764	dcm	DNA-cytosine methyltransferase	c
ecl8_01765	vsr	Very short patch repair protein	c
ecl8_01766	yedA_1	putative inner membrane transporter YedA	c
ecl8_01767	yedI	Inner membrane protein YedI	c
ecl8_01768	dgcQ	putative diguanylate cyclase DgcQ	c
ecl8_01769	ecl8_01769	hypothetical protein	c
ecl8_01770	dsrB	Protein DsrB	c
ecl8_01771	rcsA_1	Transcriptional regulatory protein RcsA	c
ecl8_01772	ecl8_01772	hypothetical protein	c
ecl8_01773	amyA	Cytoplasmic alpha-amylase	c
ecl8_01774	fliY_1	L-cystine-binding protein FliY	c
ecl8_01775	dcyD	D-cysteine desulfhydrase	c
ecl8_01776	yecS_1	L-cystine transport system permease protein YecS	c
ecl8_01777	artM_1	Arginine transport ATP-binding protein ArtM	c
ecl8_01778	sdiA	Regulatory protein SdiA	c
ecl8_01779	ecl8_01779	hypothetical protein	c
ecl8_01780	uvrY	Response regulator UvrY	c
ecl8_01781	uvrC	UvrABC system protein C	c
ecl8_01782	pgsA	CDP-diacylglycerol--glycerol-3-phosphate 3-phosphatidyltransferase	c
ecl8_01783	ecl8_01783	tRNA-Gly	c
ecl8_01784	ecl8_01784	tRNA-Cys	c
ecl8_01785	ecl8_01785	tRNA-Leu	c
ecl8_01786	dapA_2	4-hydroxy-tetrahydrodipicolinate synthase	c
ecl8_01787	secA_1	Protein translocase subunit SecA	c
ecl8_01788	tyrP_2	Tyrosine-specific transport protein	c
ecl8_01789	ecl8_01789	hypothetical protein	c
ecl8_01790	ftnA_1	Bacterial non-heme ferritin	c
ecl8_01791	ecl8_01791	hypothetical protein	c
ecl8_01792	hsrA_2	putative transport protein HsrA	c
ecl8_01793	ecl8_01793	hypothetical protein	c
ecl8_01794	yagG_1	Putative glycoside/cation symporter YagG	c
ecl8_01795	ftnA_2	Bacterial non-heme ferritin	c
ecl8_01796	araF	L-arabinose-binding periplasmic protein	c
ecl8_01797	araG	Arabinose import ATP-binding protein AraG	c
ecl8_01798	rbsC_1	Ribose import permease protein RbsC	c
ecl8_01799	otsB	Trehalose-6-phosphate phosphatase	c
ecl8_01800	otsA	Trehalose-6-phosphate synthase	c
ecl8_01801	uspC	Universal stress protein C	c
ecl8_01802	yagG_2	Putative glycoside/cation symporter YagG	c
ecl8_01803	yesR	Unsaturated rhamnogalacturonyl hydrolase YesR	c
ecl8_01804	argS	Arginine--tRNA ligase	c
ecl8_01805	yecM	Protein YecM	c
ecl8_01806	cutC_1	Copper homeostasis protein CutC	c
ecl8_01807	cmoB	tRNA U34 carboxymethyltransferase	c
ecl8_01808	cmoA	Carboxy-S-adenosyl-L-methionine synthase	c
ecl8_01809	yecN	Inner membrane protein YecN	c
ecl8_01810	ecl8_01810	hypothetical protein	c
ecl8_01811	yecD	Isochorismatase family protein YecD	c
ecl8_01812	aspS	Aspartate--tRNA ligase	c
ecl8_01813	nudB	Dihydroneopterin triphosphate diphosphatase	c
ecl8_01814	yebC	putative transcriptional regulatory protein YebC	c
ecl8_01815	ruvC	Crossover junction endodeoxyribonuclease RuvC	c
ecl8_01816	ruvA	Holliday junction ATP-dependent DNA helicase RuvA	c
ecl8_01817	ruvB	Holliday junction ATP-dependent DNA helicase RuvB	c
ecl8_01818	znuB	High-affinity zinc uptake system membrane protein ZnuB	c
ecl8_01819	znuC	Zinc import ATP-binding protein ZnuC	c
ecl8_01820	znuA	High-affinity zinc uptake system protein ZnuA	c
ecl8_01821	mepM_1	Murein DD-endopeptidase MepM	c
ecl8_01822	lpxM	Lipid A biosynthesis myristoyltransferase	c
ecl8_01823	pykA	Pyruvate kinase II	c
ecl8_01824	hexR_1	HTH-type transcriptional regulator HexR	c
ecl8_01825	zwf	Glucose-6-phosphate 1-dehydrogenase	c
ecl8_01826	edd	Phosphogluconate dehydratase	c
ecl8_01827	eda	KHG/KDPG aldolase	c
ecl8_01828	purT	Formate-dependent phosphoribosylglycinamide formyltransferase	c
ecl8_01829	ecl8_01829	hypothetical protein	c
ecl8_01830	yebE	Inner membrane protein YebE	c
ecl8_01831	ptrB	Protease 2	c
ecl8_01832	exoX	Exodeoxyribonuclease 10	c
ecl8_01833	holE	DNA polymerase III subunit theta	c
ecl8_01834	yobA	Protein YobA	c
ecl8_01835	yebZ	Inner membrane protein YebZ	c
ecl8_01836	ecl8_01836	hypothetical protein	c
ecl8_01837	ecl8_01837	hypothetical protein	c
ecl8_01838	ecl8_01838	hypothetical protein	c
ecl8_01839	pphA	Serine/threonine-protein phosphatase 1	c
ecl8_01840	ecl8_01840	hypothetical protein	c
ecl8_01841	yebV	putative protein YebV	c
ecl8_01842	rsmF	Ribosomal RNA small subunit methyltransferase F	c
ecl8_01843	ecl8_01843	hypothetical protein	c
ecl8_01844	yebS	Inner membrane protein YebS	c
ecl8_01845	msrC	Free methionine-R-sulfoxide reductase	c
ecl8_01846	proQ	RNA chaperone ProQ	c
ecl8_01847	prc	Tail-specific protease	c
ecl8_01848	htpX	Protease HtpX	c
ecl8_01849	ribZ_2	Riboflavin transporter RibZ	c
ecl8_01850	kdgR_2	Transcriptional regulator KdgR	c
ecl8_01851	ecl8_01851	hypothetical protein	c
ecl8_01852	ecl8_01852	hypothetical protein	c
ecl8_01853	cspC	Cold shock-like protein CspC	c
ecl8_01854	ftsI_1	Peptidoglycan D,D-transpeptidase FtsI	c
ecl8_01855	rlmA	23S rRNA (guanine(745)-N(1))-methyltransferase	c
ecl8_01856	mntP	putative manganese efflux pump MntP	c
ecl8_01857	ecl8_01857	hypothetical protein	c
ecl8_01858	manZ_1	PTS system mannose-specific EIID component	c
ecl8_01859	manY	PTS system mannose-specific EIIC component	c
ecl8_01860	manX_1	PTS system mannose-specific EIIAB component	c
ecl8_01861	ecl8_01861	hypothetical protein	c
ecl8_01862	pdeD	putative cyclic di-GMP phosphodiesterase PdeD	c
ecl8_01863	sdaA	L-serine dehydratase 1	c
ecl8_01864	nudL	putative Nudix hydrolase NudL	c
ecl8_01865	pabB	Aminodeoxychorismate synthase component 1	c
ecl8_01866	ecl8_01866	hypothetical protein	c
ecl8_01867	yabJ_1	2-iminobutanoate/2-iminopropanoate deaminase	c
ecl8_01868	dinG_1	putative ATP-dependent helicase DinG	c
ecl8_01869	tsaB	tRNA threonylcarbamoyladenosine biosynthesis protein TsaB	c
ecl8_01870	slp	Outer membrane protein slp	c
ecl8_01871	fadD	Long-chain-fatty-acid--CoA ligase	c
ecl8_01872	rnd	Ribonuclease D	c
ecl8_01873	minE	Cell division topological specificity factor	c
ecl8_01874	minD	Septum site-determining protein MinD	c
ecl8_01875	minC	Septum site-determining protein MinC	c
ecl8_01876	ycgL	Protein YcgL	c
ecl8_01877	ycgM	putative protein YcgM	c
ecl8_01878	ecl8_01878	hypothetical protein	c
ecl8_01879	yeaR_2	putative protein YeaR	c
ecl8_01880	dsbB	Disulfide bond formation protein B	c
ecl8_01881	nhaB	Na(+)/H(+) antiporter NhaB	c
ecl8_01882	fadR_1	Fatty acid metabolism regulator protein	c
ecl8_01883	ecl8_01883	hypothetical protein	c
ecl8_01884	dadA_1	D-amino acid dehydrogenase	c
ecl8_01885	dadX	Alanine racemase, catabolic	c
ecl8_01886	cvrA	K(+)/H(+) antiporter NhaP2	c
ecl8_01887	ldcA	Murein tetrapeptide carboxypeptidase	c
ecl8_01888	emtA	Endo-type membrane-bound lytic murein transglycosylase A	c
ecl8_01889	fhuA_1	Ferrichrome outer membrane transporter/phage receptor	c
ecl8_01890	treA	Periplasmic trehalase	c
ecl8_01891	ecl8_01891	hypothetical protein	c
ecl8_01892	ecl8_01892	hypothetical protein	c
ecl8_01893	ecl8_01893	hypothetical protein	c
ecl8_01894	ecl8_01894	hypothetical protein	c
ecl8_01895	ecl8_01895	hypothetical protein	c
ecl8_01896	ecl8_01896	hypothetical protein	c
ecl8_01897	ecl8_01897	hypothetical protein	c
ecl8_01898	ecl8_01898	hypothetical protein	c
ecl8_01899	tsaR_2	HTH-type transcriptional regulator TsaR	c
ecl8_01900	tdcB	L-threonine dehydratase catabolic TdcB	c
ecl8_01901	tdcC	Threonine/serine transporter TdcC	c
ecl8_01902	tdcD	Propionate kinase	c
ecl8_01903	tdcE	PFL-like enzyme TdcE	c
ecl8_01904	livJ_2	Leu/Ile/Val/Thr-binding protein	c
ecl8_01905	livH_2	High-affinity branched-chain amino acid transport system permease protein LivH	c
ecl8_01906	livH_3	High-affinity branched-chain amino acid transport system permease protein LivH	c
ecl8_01907	glnQ_1	Glutamine transport ATP-binding protein GlnQ	c
ecl8_01908	livF_2	High-affinity branched-chain amino acid transport ATP-binding protein LivF	c
ecl8_01909	yjiE	HTH-type transcriptional regulator YjiE	c
ecl8_01910	pckA_2	Phosphoenolpyruvate carboxykinase (ATP)	c
ecl8_01911	bltD	Spermine/spermidine acetyltransferase	c
ecl8_01912	pcpR_1	PCP degradation transcriptional activation protein	c
ecl8_01913	kgtP_2	Alpha-ketoglutarate permease	c
ecl8_01914	ais	Aconitate isomerase	c
ecl8_01915	cynR_3	HTH-type transcriptional regulator CynR	c
ecl8_01916	ecl8_01916	hypothetical protein	c
ecl8_01917	rluA_1	Ribosomal large subunit pseudouridine synthase A	c
ecl8_01918	ecl8_01918	hypothetical protein	c
ecl8_01919	ecl8_01919	hypothetical protein	c
ecl8_01920	ecl8_01920	hypothetical protein	c
ecl8_01921	ecl8_01921	hypothetical protein	c
ecl8_01922	oprF_1	Outer membrane porin F	c
ecl8_01923	vgrG1_1	Actin cross-linking toxin VgrG1	c
ecl8_01924	safA	SpoIVD-associated factor A	c
ecl8_01925	ecl8_01925	hypothetical protein	c
ecl8_01926	ecl8_01926	hypothetical protein	c
ecl8_01927	ecl8_01927	hypothetical protein	c
ecl8_01928	ecl8_01928	hypothetical protein	c
ecl8_01929	ecl8_01929	hypothetical protein	c
ecl8_01930	ecl8_01930	hypothetical protein	c
ecl8_01931	ecl8_01931	hypothetical protein	c
ecl8_01932	ecl8_01932	hypothetical protein	c
ecl8_01933	thpA_1	D-threitol-binding protein	c
ecl8_01934	ecl8_01934	hypothetical protein	c
ecl8_01935	ychF	Ribosome-binding ATPase YchF	c
ecl8_01936	pth	Peptidyl-tRNA hydrolase	c
ecl8_01937	ecl8_01937	hypothetical protein	c
ecl8_01938	nolA	Nodulation protein NolA	c
ecl8_01939	dauA_1	C4-dicarboxylic acid transporter DauA	c
ecl8_01940	prs	Ribose-phosphate pyrophosphokinase	c
ecl8_01941	ispE	4-diphosphocytidyl-2-C-methyl-D-erythritol kinase	c
ecl8_01942	lolB	Outer-membrane lipoprotein LolB	c
ecl8_01943	hemA	Glutamyl-tRNA reductase	c
ecl8_01944	prfA	Peptide chain release factor RF1	c
ecl8_01945	prmC	Release factor glutamine methyltransferase	c
ecl8_01946	ychQ	Protein YchQ	c
ecl8_01947	ecl8_01947	hypothetical protein	c
ecl8_01948	kdsA	2-dehydro-3-deoxyphosphooctonate aldolase	c
ecl8_01949	chaA	Sodium-potassium/proton antiporter ChaA	c
ecl8_01950	chaB	Putative cation transport regulator ChaB	c
ecl8_01951	chaC	Glutathione-specific gamma-glutamylcyclotransferase	c
ecl8_01952	ecl8_01952	hypothetical protein	c
ecl8_01953	ychN	Protein YchN	c
ecl8_01954	nasR	Nitrate regulatory protein	c
ecl8_01955	nrtA	Nitrate transport protein NrtA	c
ecl8_01956	cmpB	Bicarbonate transport system permease protein CmpB	c
ecl8_01957	cmpC_1	Bicarbonate transport ATP-binding protein CmpC	c
ecl8_01958	nasD_2	Nitrite reductase [NAD(P)H]	c
ecl8_01959	nasA_1	Nitrate reductase	c
ecl8_01960	nasA_2	Nitrate reductase	c
ecl8_01961	nasA_3	Nitrate reductase	c
ecl8_01962	ecl8_01962	Invasin	c
ecl8_01963	narL	Nitrate/nitrite response regulator protein NarL	c
ecl8_01964	narX	Nitrate/nitrite sensor protein NarX	c
ecl8_01965	narK	Nitrate/nitrite transporter NarK	c
ecl8_01966	narG	Respiratory nitrate reductase 1 alpha chain	c
ecl8_01967	narH	Respiratory nitrate reductase 1 beta chain	c
ecl8_01968	narJ	Nitrate reductase molybdenum cofactor assembly chaperone NarJ	c
ecl8_01969	narI	Respiratory nitrate reductase 1 gamma chain	c
ecl8_01970	ecl8_01970	hypothetical protein	c
ecl8_01971	lrpC	HTH-type transcriptional regulator LrpC	c
ecl8_01972	ecl8_01972	tRNA-Tyr	c
ecl8_01973	ecl8_01973	tRNA-Tyr	c
ecl8_01974	purU	Formyltetrahydrofolate deformylase	c
ecl8_01975	ecl8_01975	hypothetical protein	c
ecl8_01976	ecl8_01976	putative NTE family protein	c
ecl8_01977	rssB	Regulator of RpoS	c
ecl8_01978	galU	UTP--glucose-1-phosphate uridylyltransferase	c
ecl8_01979	hns_1	DNA-binding protein H-NS	c
ecl8_01980	tdk	Thymidine kinase	c
ecl8_01981	adhE_4	Aldehyde-alcohol dehydrogenase	c
ecl8_01982	ecl8_01982	hypothetical protein	c
ecl8_01983	oppA_1	Periplasmic oligopeptide-binding protein	c
ecl8_01984	oppB	Oligopeptide transport system permease protein OppB	c
ecl8_01985	oppC	Oligopeptide transport system permease protein OppC	c
ecl8_01986	oppD_3	Oligopeptide transport ATP-binding protein OppD	c
ecl8_01987	oppF_3	Oligopeptide transport ATP-binding protein OppF	c
ecl8_01988	ecl8_01988	Cyclic nucleotide-gated potassium channel	c
ecl8_01989	ecl8_01989	hypothetical protein	c
ecl8_01990	clsA	Cardiolipin synthase A	c
ecl8_01991	ecl8_01991	hypothetical protein	c
ecl8_01992	yceI	Protein YceI	c
ecl8_01993	yciI	Protein YciI	c
ecl8_01994	ecl8_01994	hypothetical protein	c
ecl8_01995	ecl8_01995	hypothetical protein	c
ecl8_01996	ecl8_01996	hypothetical protein	c
ecl8_01997	ecl8_01997	hypothetical protein	c
ecl8_01998	ecl8_01998	hypothetical protein	c
ecl8_01999	ecl8_01999	hypothetical protein	c
[truncated: 3,281 more rows]

## Sheet: IPGA
Selected genome assemblies for IPGA webserver KpI phylogenetic analysis
Sequence type	AssemblyAccession	Sample ID	AssemblyAccession
ST37	GCA_904866315	INF346	GCA_904866315.1,
ST111	GCA_904865805	INF144	GCA_904865805.1,
ST133	GCA_904863145	INF072	GCA_904863145.1,
ST17	GCA_904866435	INF119	GCA_904866435.1,
ST20	GCA_904863365	INF049	GCA_904863365.1,
ST221	GCA_904863205	INF008	GCA_904863205.1,
ST231	GCA_904865815	INF281	GCA_904865815.1,
ST27	GCA_904866555	INF102	GCA_904866555.1,
ST29	GCA_003432185	INF206	GCA_003432185.1,
ST3072	GCA_904866255	INF223	GCA_904866255.1,
ST323	GCA_904865825	INF018	GCA_904865825.1,
ST340	GCA_002753075	INF157	GCA_002753075.1,
ST35	GCA_904866205	INF145	GCA_904866205.1,
ST412	GCA_904865685	INF182	GCA_904865685.1,
ST45	GCA_003432285	INF125	GCA_003432285.1,
ST491	GCA_904866285	INF344	GCA_904866285.1,
ST629	GCA_015278095.1	S90-2	GCA_015278095.1,
ST661	GCA_904863265	INF156	GCA_904863265.1,
ST792	GCA_904865755	INF341	GCA_904865755.1,
ST86	GCA_904864505	INF331	GCA_904864505.1,
Lab strains	Sequence type
ECL8	ST375	ECL8
KPNIH1	ST258	GCA_000281535.2	GCA_000281535.2,
RH201207	ST258	GCA_905477585.1	GCA_905477585.1,
ATCC 43816	ST493	GCA_000742755.1	GCA_000742755.1,
B5055, 52.145	ST66	GCA_024138975.1	GCA_024138975.1,
MGH78578	ST38	GCA_000016305.1	GCA_000016305.1,
NTUHK2044	ST23	GCA_000009885.1	GCA_000009885.1,
