# Supplementary material for: Transposon mutagenesis screen in Klebsiella pneumoniae identifies genetic determinants required for growth in human urine and serum
Source: eLife. 2024 Aug 27;12:RP88971. doi: 10.7554/eLife.88971 (PMC11349299; doi:10.7554/eLife.88971)
Supplement: Figure 4—source data 1. [file elife-88971-fig4-data1.xlsx]

## Sheet: Table S5_ECL8_Urinome
Figure 4-source data 1: List of Log2FC sequence read values of ECL8 genes passaged in urine, relative to an LB control
locus_tag	gene_name	function	logFC	logCPM	PValue	q.value
ecl8_04972	sodA	Superoxide dismutase [Mn]	-4.78615	5.82433	1.92273e-15	4.42131e-13
ecl8_03190	ompA	Outer membrane protein A	-3.83063	5.34328	1.36482e-10	1.49447e-08
ecl8_00682	exbD	Biopolymer transport protein ExbD	-3.56162	4.64044	1.01594e-08	7.91917e-07
ecl8_00681	exbB	Biopolymer transport protein ExbB	-3.35175	5.70308	2.50383e-14	4.60604e-12
ecl8_03614	fepG	Ferric enterobactin transport system permease protein FepG	-3.09765	5.08147	1.84508e-07	1.22979e-05
ecl8_04124	skp	Chaperone protein Skp	-2.93394	4.04585	9.48924e-06	0.000445317
ecl8_03613	fepD	Ferric enterobactin transport system permease protein FepD	-2.57044	6.22833	2.5413e-10	2.59721e-08
ecl8_04940	argH	Argininosuccinate lyase	-2.44027	7.68624	2.45695e-22	1.12995e-19
ecl8_03611	fepB	Ferrienterobactin-binding periplasmic protein	-2.2759	6.42488	3.97631e-10	3.8098e-08
ecl8_04577	ecl8_04577	hypothetical protein	-2.19034	7.68218	4.79674e-21	2.00547e-18
ecl8_00842	xerD_2	Tyrosine recombinase XerD	-2.00127	10.0083	1.52763e-06	9.00712e-05
ecl8_00853	pdeH_1	Cyclic di-GMP phosphodiesterase PdeH	-1.81933	10.5045	0.000732845	0.0214672
ecl8_03915	ecl8_03915	hypothetical protein	-1.80177	5.74988	0.00191753	0.0474124
ecl8_05230	ecl8_05230	hypothetical protein	-1.66942	6.01254	2.45963e-05	0.00105631
ecl8_00992	relA	GTP pyrophosphokinase	-1.65624	8.00772	4.61094e-13	7.06857e-11
ecl8_03617	ybdZ	Enterobactin biosynthesis protein YbdZ	-1.58205	5.11951	0.000287167	0.00943345
ecl8_02190	cynT	Carbonic anhydrase 1	-1.55401	5.01343	0.000321099	0.0102489
ecl8_03619	fepA_1	Ferrienterobactin receptor	-1.52579	7.8313	3.64489e-10	3.56656e-08
ecl8_03615	fepC_2	Ferric enterobactin transport ATP-binding protein FepC	-1.47216	5.6913	0.000250209	0.00839934
ecl8_01950	chaB	Putative cation transport regulator ChaB	-1.46813	4.59026	0.00108644	0.0299193
ecl8_02854	tyrR	Transcriptional regulatory protein TyrR	-1.4319	6.13294	4.98377e-05	0.00192608
ecl8_00528	argG	Argininosuccinate synthase	-1.40053	8.77132	1.68416e-13	2.67084e-11
ecl8_03577	mtnD	Acireductone dioxygenase	-1.35422	6.1828	0.000122096	0.00437366
ecl8_03110	mdoG	Glucans biosynthesis protein G	-1.3508	7.19649	3.81331e-05	0.00155198
ecl8_03982	proC	Pyrroline-5-carboxylate reductase	-1.28099	4.59122	0.00425962	0.0890455
ecl8_03454	galE	UDP-glucose 4-epimerase	-1.21475	6.56027	3.5678e-05	0.00147823
ecl8_00154	envC	Murein hydrolase activator EnvC	-1.16292	7.68257	3.2381e-05	0.00135382
ecl8_00315	gntR_1	HTH-type transcriptional regulator GntR	-1.10681	6.16968	0.00283049	0.0647632
ecl8_02959	ydjA	Putative NAD(P)H nitroreductase YdjA	-1.09765	6.48817	0.000396298	0.0122881
ecl8_04031	proA	Gamma-glutamyl phosphate reductase	-1.09356	7.28925	3.78624e-05	0.00155198
ecl8_04237	leuC	3-isopropylmalate dehydratase large subunit	-1.09077	8.00879	2.0278e-06	0.000116573
ecl8_03155	puuR	HTH-type transcriptional regulator PuuR	-1.07687	8.1312	6.83788e-08	4.69364e-06
ecl8_04030	proB	Glutamate 5-kinase	-1.03332	6.78991	0.000758551	0.021947
ecl8_01277	yfgJ	putative protein YfgJ	-1.02219	5.38748	0.0691411	0.585598
ecl8_04527	argI	Ornithine carbamoyltransferase subunit I	-1.00266	7.53987	0.00226991	0.054656
ecl8_01641	oppF_2	Oligopeptide transport ATP-binding protein OppF	-0.978599	6.59945	0.00353287	0.07664
ecl8_05175	cusF_2	Cation efflux system protein CusF	-0.974613	5.47309	0.0191249	0.277462
ecl8_02995	leuE	Leucine efflux protein	-0.973842	6.86215	0.00138955	0.0361048
ecl8_03576	mtnC	Enolase-phosphatase E1	-0.97139	6.20697	0.00643215	0.125428
ecl8_00902	ecl8_00902	hypothetical protein	-0.966604	5.62199	0.0298628	0.378344
ecl8_04238	leuD1	3-isopropylmalate dehydratase small subunit 1	-0.950383	8.21488	8.94454e-06	0.000428499
ecl8_04102	metN_4	Methionine import ATP-binding protein MetN	-0.932045	8.52371	7.04261e-06	0.000344563
ecl8_04351	fhuF	Ferric iron reductase protein FhuF	-0.931871	7.77969	9.1575e-06	0.000434179
ecl8_02204	asr	Acid shock protein	-0.917575	5.57209	0.0165425	0.247884
ecl8_01139	acoR_2	Acetoin dehydrogenase operon transcriptional activator AcoR	-0.909712	6.62272	0.00346498	0.0755234
ecl8_03251	lrp_3	Leucine-responsive regulatory protein	-0.905883	7.13624	0.000311127	0.0100061
ecl8_02163	amnD	2-aminomuconate deaminase	-0.904688	5.79749	0.0484519	0.501417
ecl8_01425	ecl8_01425	hypothetical protein	-0.901723	6.69429	0.00460637	0.0955286
ecl8_03109	mdoH	Glucans biosynthesis glucosyltransferase H	-0.881901	7.29147	0.00419248	0.0885072
ecl8_04412	ecl8_04412	hypothetical protein	-0.864184	5.25436	0.0357816	0.417664
ecl8_02021	metQ_2	D-methionine-binding lipoprotein MetQ	-0.847118	7.01874	0.00252802	0.059017
ecl8_03876	rpmE2	50S ribosomal protein L31 type B	-0.83995	5.19331	0.0612584	0.558983
ecl8_02532	ecl8_02532	hypothetical protein	-0.827262	6.23281	0.02902	0.371763
ecl8_00946	cobU	Bifunctional adenosylcobalamin biosynthesis protein CobU	-0.820299	6.1241	0.0172002	0.255502
ecl8_04103	metI_4	D-methionine transport system permease protein MetI	-0.819172	7.85324	0.000157621	0.00553357
ecl8_02875	ves	Protein Ves	-0.81215	5.58685	0.0368296	0.425576
ecl8_04543	celA_2	PTS system cellobiose-specific EIIB component	-0.811185	5.57518	0.0762436	0.609167
ecl8_04865	metR	HTH-type transcriptional regulator MetR	-0.807778	7.46109	0.000397981	0.0122881
ecl8_03139	rutD	Putative aminoacrylate hydrolase RutD	-0.80434	7.07324	0.0238727	0.328715
ecl8_00760	bdbD	Disulfide bond formation protein D	-0.799143	5.52006	0.0682632	0.585249
ecl8_03603	ecl8_03603	hypothetical protein	-0.792004	5.69886	0.0417222	0.46252
ecl8_01510	rpnA_2	Recombination-promoting nuclease RpnA	-0.790508	6.95393	0.00894333	0.163216
ecl8_04961	ftsN	Cell division protein FtsN	-0.775708	7.43299	0.00196077	0.0482223
ecl8_02169	ecl8_02169	Isoxanthopterin deaminase	-0.774245	5.27456	0.0712943	0.593641
ecl8_03649	isfD	Sulfoacetaldehyde reductase	-0.771956	7.02386	0.00964612	0.173291
ecl8_02827	ecl8_02827	hypothetical protein	-0.754672	5.94352	0.0553088	0.536635
ecl8_02691	smrA_2	putative DNA endonuclease SmrA	-0.747683	5.85257	0.0734629	0.599035
ecl8_01710	ahcY	Adenosylhomocysteinase	-0.747056	7.62797	0.000489562	0.0149106
ecl8_02689	pcaI	3-oxoadipate CoA-transferase subunit A	-0.747048	6.12963	0.0400906	0.449699
ecl8_02051	ecl8_02051	hypothetical protein	-0.73272	5.5674	0.058702	0.549838
ecl8_01049	mntB_2	Manganese transport system membrane protein MntB	-0.723463	7.00844	0.00416901	0.0885072
ecl8_02541	uao	Uric acid degradation bifunctional protein	-0.722102	5.35116	0.141041	0.773136
ecl8_04876	corA	Magnesium transport protein CorA	-0.717989	5.90975	0.0873676	0.638797
ecl8_02398	dipZ_1	Protein DipZ	-0.716976	5.72095	0.0601569	0.557492
ecl8_00984	ecl8_00984	hypothetical protein	-0.71625	6.80952	0.02023	0.291655
ecl8_02162	ecl8_02162	hypothetical protein	-0.707774	5.85137	0.0815856	0.618147
ecl8_04275	carA_2	Carbamoyl-phosphate synthase small chain	-0.707557	7.33428	0.00277488	0.0638084
ecl8_03218	ecl8_03218	hypothetical protein	-0.707127	8.41545	0.00150961	0.0383575
ecl8_01531	atoD	Acetate CoA-transferase subunit alpha	-0.705631	6.15132	0.0712445	0.593641
ecl8_03100	dinI_2	DNA damage-inducible protein I	-0.701393	5.71916	0.0639018	0.577376
ecl8_02550	ecl8_02550	hypothetical protein	-0.699145	5.93841	0.0558332	0.539447
ecl8_01559	yejG	putative protein YejG	-0.697674	7.52721	0.0018999	0.0472306
ecl8_02976	dmlR_13	HTH-type transcriptional regulator DmlR	-0.696776	6.77296	0.0208349	0.297576
ecl8_02171	glpR_2	Glycerol-3-phosphate regulon repressor	-0.694477	6.00538	0.0922439	0.659766
ecl8_01196	raiA	Ribosome-associated inhibitor A	-0.694099	6.78721	0.0135022	0.218026
ecl8_01335	hemF	Oxygen-dependent coproporphyrinogen-III oxidase	-0.692454	6.00111	0.155999	0.801611
ecl8_00481	sspB	Stringent starvation protein B	-0.689442	6.32138	0.0570562	0.54551
ecl8_03594	mtnA	Methylthioribose-1-phosphate isomerase	-0.680277	7.12778	0.00692356	0.132673
ecl8_03417	livF_4	High-affinity branched-chain amino acid transport ATP-binding protein LivF	-0.679378	6.31489	0.0436176	0.473107
ecl8_00335	bhsA_1	Multiple stress resistance protein BhsA	-0.677521	5.14807	0.103337	0.692779
ecl8_01694	hisC	Histidinol-phosphate aminotransferase	-0.677516	7.36525	0.00873225	0.159998
ecl8_00232	ecl8_00232	hypothetical protein	-0.675048	5.37251	0.102289	0.691804
ecl8_01015	rpoS	RNA polymerase sigma factor RpoS	-0.671885	7.68385	0.0105215	0.183987
ecl8_00776	idi	Isopentenyl-diphosphate Delta-isomerase	-0.671753	5.87549	0.0734138	0.599035
ecl8_01692	hisH	Imidazole glycerol phosphate synthase subunit HisH	-0.669058	6.90675	0.01032	0.181845
ecl8_00932	cbiD	Cobalt-precorrin-5B C(1)-methyltransferase	-0.668191	6.87859	0.0117106	0.197768
ecl8_04274	carB	Carbamoyl-phosphate synthase large chain	-0.666897	8.98157	0.000486874	0.0149106
ecl8_01791	ecl8_01791	hypothetical protein	-0.665429	6.55433	0.0452705	0.485313
ecl8_02948	ynjC_1	Inner membrane ABC transporter permease protein YnjC	-0.665427	6.15445	0.0749296	0.60325
ecl8_01481	ecl8_01481	hypothetical protein	-0.664222	6.2986	0.0998389	0.688395
ecl8_02058	ynhG	putative L,D-transpeptidase YnhG	-0.660935	7.73639	0.00494075	0.100542
ecl8_03507	ecl8_03507	hypothetical protein	-0.656931	6.12551	0.067068	0.585249
ecl8_03033	phoP_3	Virulence transcriptional regulatory protein PhoP	-0.656785	6.65891	0.0297042	0.377375
ecl8_04581	ecl8_04581	hypothetical protein	-0.653411	5.76793	0.0715033	0.593641
ecl8_02500	ykkD	Multidrug resistance protein YkkD	-0.653225	5.59909	0.109867	0.710659
ecl8_03861	ybaN	Inner membrane protein YbaN	-0.64764	5.84695	0.0789927	0.615193
ecl8_02573	ecl8_02573	putative signaling protein	-0.647461	8.1813	0.0050325	0.101958
ecl8_03604	ecl8_03604	hypothetical protein	-0.646575	5.76048	0.129848	0.750696
ecl8_00934	cbiT	Cobalt-precorrin-6B C(15)-methyltransferase (decarboxylating)	-0.645496	6.14452	0.117028	0.722544
ecl8_03574	ybdM_1	putative protein YbdM	-0.644417	6.14306	0.0774356	0.614011
ecl8_01232	mltF_1	Membrane-bound lytic murein transglycosylase F	-0.643113	7.63441	0.00233355	0.0558957
ecl8_02975	ecl8_02975	hypothetical protein	-0.642923	5.78467	0.105774	0.697925
ecl8_03347	yliI	Aldose sugar dehydrogenase YliI	-0.642225	7.37293	0.0112946	0.192384
ecl8_02234	pdxY	Pyridoxal kinase PdxY	-0.641427	7.19364	0.0214247	0.302054
ecl8_02230	anmK	Anhydro-N-acetylmuramic acid kinase	-0.640486	7.06991	0.0275886	0.361383
ecl8_00080	rclR_1	RCS-specific HTH-type transcriptional activator RclR	-0.639168	7.313	0.0165471	0.247884
ecl8_03477	ybgC	Acyl-CoA thioester hydrolase YbgC	-0.635808	4.75048	0.187079	0.844334
ecl8_02774	ecl8_02774	Putative 2-dehydropantoate 2-reductase	-0.635102	6.58137	0.0317619	0.39057
ecl8_03586	mtnB	Methylthioribulose-1-phosphate dehydratase	-0.630291	5.82095	0.0856219	0.636148
ecl8_03848	ecl8_03848	hypothetical protein	-0.628497	6.89983	0.0162832	0.246336
ecl8_01418	ecl8_01418	hypothetical protein	-0.627019	8.12574	0.00287862	0.0655384
ecl8_03727	thpA_2	D-threitol-binding protein	-0.623611	6.61424	0.0441367	0.47649
ecl8_04676	ecl8_04676	hypothetical protein	-0.623135	6.56419	0.0806888	0.616463
ecl8_03926	ecl8_03926	hypothetical protein	-0.622127	5.71849	0.105636	0.697925
ecl8_03610	entC	Isochorismate synthase EntC	-0.619814	6.79341	0.0461603	0.487539
ecl8_03841	ybbN	putative protein YbbN	-0.618953	7.67535	0.00963643	0.173291
ecl8_04736	suhB_3	Inositol-1-monophosphatase	-0.618077	6.87672	0.0241801	0.329006
ecl8_04400	ecl8_04400	hypothetical protein	-0.616987	4.98691	0.141716	0.773136
ecl8_00352	ecl8_00352	hypothetical protein	-0.616403	6.47811	0.0492454	0.507802
ecl8_01111	luxS	S-ribosylhomocysteine lyase	-0.615744	5.82994	0.125949	0.744524
ecl8_04063	crl	Sigma factor-binding protein Crl	-0.614133	5.85711	0.0938582	0.666133
ecl8_01806	cutC_1	Copper homeostasis protein CutC	-0.613581	6.33362	0.104557	0.695609
ecl8_01333	eutK	Ethanolamine utilization protein EutK	-0.613133	6.62783	0.0423892	0.466382
ecl8_03300	ecl8_03300	hypothetical protein	-0.612569	6.41538	0.0778183	0.614212
ecl8_01424	ecl8_01424	hypothetical protein	-0.611653	7.26125	0.0330319	0.398679
ecl8_01777	artM_1	Arginine transport ATP-binding protein ArtM	-0.604154	7.06732	0.0525542	0.52551
ecl8_02089	ydbM	Putative acyl-CoA dehydrogenase YdbM	-0.601915	7.176	0.0285008	0.367157
ecl8_02426	ecl8_02426	hypothetical protein	-0.601622	5.59391	0.192165	0.852801
ecl8_00107	ecl8_00107	hypothetical protein	-0.597347	6.91217	0.0244064	0.331106
ecl8_01622	uspA_2	Universal stress protein A	-0.596816	6.65737	0.0609645	0.558517
ecl8_02657	ecl8_02657	hypothetical protein	-0.594691	6.42994	0.0736605	0.599583
ecl8_03146	yccJ	putative protein YccJ	-0.591186	5.6499	0.127956	0.747737
ecl8_00023	yidH	Inner membrane protein YidH	-0.588749	5.21436	0.227084	0.879831
ecl8_02753	paaH	3-hydroxyadipyl-CoA dehydrogenase	-0.587785	7.24812	0.0296018	0.377116
ecl8_02099	ybbH	putative HTH-type transcriptional regulator YbbH	-0.585379	7.10697	0.0375626	0.429069
ecl8_01930	ecl8_01930	hypothetical protein	-0.58386	6.09283	0.113115	0.715565
ecl8_01393	ecl8_01393	hypothetical protein	-0.583838	6.98666	0.0341944	0.405323
ecl8_03182	hspQ	Heat shock protein HspQ	-0.581361	5.91807	0.124446	0.743283
ecl8_04476	ecl8_04476	hypothetical protein	-0.580704	5.6985	0.167266	0.818357
ecl8_02717	malY	Protein MalY	-0.578811	7.18731	0.0276597	0.361383
ecl8_02306	aroK_2	Shikimate kinase	-0.577756	6.26751	0.176437	0.831553
ecl8_02782	hslJ	Heat shock protein HslJ	-0.576383	6.30937	0.0783784	0.615193
ecl8_03244	dmsC_2	Anaerobic dimethyl sulfoxide reductase chain C	-0.57638	6.95691	0.0245812	0.331522
ecl8_03642	ddpC_4	putative D,D-dipeptide transport system permease protein DdpC	-0.576017	6.5836	0.0898254	0.649857
ecl8_02260	pcaH	Protocatechuate 3,4-dioxygenase beta chain	-0.573634	6.43738	0.0881402	0.641989
ecl8_01653	phoP_1	Virulence transcriptional regulatory protein PhoP	-0.572316	6.92017	0.0332883	0.398679
ecl8_02037	xecA1	2-hydroxypropyl-CoM lyase	-0.572209	7.43401	0.0201234	0.29103
ecl8_04236	leuB	3-isopropylmalate dehydrogenase	-0.571515	7.72401	0.00794631	0.147701
ecl8_02645	ynfD	putative protein YnfD	-0.570847	5.13805	0.202063	0.855367
ecl8_01458	usg	USG-1 protein	-0.570761	5.87061	0.144925	0.78058
ecl8_01372	ecl8_01372	hypothetical protein	-0.569346	5.69787	0.167045	0.818357
ecl8_00546	ecl8_00546	hypothetical protein	-0.569149	5.35409	0.196377	0.855367
ecl8_03288	potF	Putrescine-binding periplasmic protein	-0.568127	7.42164	0.0144214	0.227918
ecl8_01109	yqaA	Inner membrane protein YqaA	-0.566082	6.22399	0.11594	0.722544
ecl8_02988	pyrG_2	CTP synthase	-0.563647	6.36074	0.108171	0.705547
ecl8_02075	mhpC	2-hydroxy-6-oxononadienedioate/2-hydroxy-6- oxononatrienedioate hydrolase	-0.558937	7.01204	0.060209	0.557492
ecl8_00109	fpr	Flavodoxin/ferredoxin--NADP reductase	-0.55891	7.3417	0.0499501	0.513916
ecl8_01833	holE	DNA polymerase III subunit theta	-0.558899	5.18907	0.174062	0.827745
ecl8_04855	tatC	Sec-independent protein translocase protein TatC	-0.558144	7.06513	0.0446411	0.480807
ecl8_02218	gloA	Lactoylglutathione lyase	-0.557914	5.89186	0.183275	0.839766
ecl8_01420	ecl8_01420	hypothetical protein	-0.556348	5.47821	0.170274	0.822576
ecl8_03478	ecl8_03478	hypothetical protein	-0.554701	5.75674	0.169198	0.821259
ecl8_01971	lrpC	HTH-type transcriptional regulator LrpC	-0.55378	6.51015	0.0621689	0.56534
ecl8_04441	cusF_1	Cation efflux system protein CusF	-0.553765	6.19213	0.116196	0.722544
ecl8_01709	cobT_3	Nicotinate-nucleotide--dimethylbenzimidazole phosphoribosyltransferase	-0.553149	5.86938	0.266205	0.902049
ecl8_01876	ycgL	Protein YcgL	-0.551086	6.03306	0.132747	0.754011
ecl8_01365	ecl8_01365	hypothetical protein	-0.549964	6.56302	0.0656437	0.580962
ecl8_04026	ecl8_04026	putative phosphatase	-0.549197	6.74154	0.0461893	0.487539
ecl8_00480	sspA	Stringent starvation protein A	-0.547956	5.05349	0.197267	0.855367
ecl8_02920	ecl8_02920	putative acyl-CoA thioester hydrolase	-0.547354	4.95548	0.197551	0.855367
ecl8_00381	ecl8_00381	hypothetical protein	-0.546582	6.36863	0.115371	0.722544
ecl8_01829	ecl8_01829	hypothetical protein	-0.546312	5.36595	0.26101	0.900168
ecl8_05181	mepM_2	Murein DD-endopeptidase MepM	-0.545148	7.38634	0.0306197	0.38431
ecl8_03595	mtnK	Methylthioribose kinase	-0.544424	7.39382	0.0176483	0.259311
ecl8_01960	nasA_2	Nitrate reductase	-0.544074	5.95047	0.230009	0.880296
ecl8_02526	ecl8_02526	hypothetical protein	-0.544068	5.96273	0.180685	0.837671
ecl8_05242	ecl8_05242	hypothetical protein	-0.543988	8.07895	0.00643641	0.125428
ecl8_01617	rcnB_1	Nickel/cobalt homeostasis protein RcnB	-0.53938	5.64443	0.160205	0.8131
ecl8_01253	iscR	HTH-type transcriptional regulator IscR	-0.539085	5.27204	0.229944	0.880296
ecl8_02688	pcaJ	3-oxoadipate CoA-transferase subunit B	-0.538669	5.8386	0.171262	0.824676
ecl8_02216	grxD	Glutaredoxin 4	-0.538669	4.63884	0.249123	0.895174
ecl8_02284	ydcU	Inner membrane ABC transporter permease protein YdcU	-0.537004	6.87244	0.0485172	0.501417
ecl8_04775	fdtC	dTDP-3-amino-3,6-dideoxy-alpha-D-galactopyranose 3-N-acetyltransferase	-0.534527	5.71726	0.161827	0.813202
ecl8_01403	ecl8_01403	hypothetical protein	-0.533198	7.5875	0.0162334	0.246336
ecl8_00079	ecl8_00079	hypothetical protein	-0.532901	6.81637	0.0819918	0.618555
ecl8_03351	ecl8_03351	hypothetical protein	-0.532698	5.79779	0.168615	0.821046
ecl8_03637	betB_1	NAD/NADP-dependent betaine aldehyde dehydrogenase	-0.530002	7.23881	0.0422849	0.46635
ecl8_02856	dsdC_2	HTH-type transcriptional regulator DsdC	-0.529001	6.68309	0.0871019	0.638797
ecl8_03041	ymfA	Inner membrane protein YmfA	-0.52894	5.21651	0.195746	0.855367
ecl8_01731	ecl8_01731	hypothetical protein	-0.528469	5.15103	0.30332	0.923093
ecl8_02045	mdtN_2	Multidrug resistance protein MdtN	-0.528128	6.29783	0.123697	0.740734
ecl8_01553	nylB	6-aminohexanoate-dimer hydrolase	-0.526681	7.49523	0.0240724	0.329006
ecl8_02969	yhdN	Aldo-keto reductase YhdN	-0.526596	6.88989	0.0666384	0.584867
ecl8_02562	tam	Trans-aconitate 2-methyltransferase	-0.52286	6.75483	0.0749279	0.60325
ecl8_02294	ydcZ	Inner membrane protein YdcZ	-0.522369	5.33411	0.209806	0.865831
ecl8_00667	qseB	Transcriptional regulatory protein QseB	-0.52162	7.23469	0.0426768	0.468426
ecl8_02389	ptrA_2	Protease 3	-0.51932	7.32592	0.0435515	0.473107
ecl8_01433	ecl8_01433	hypothetical protein	-0.516992	9.65926	0.0112824	0.192384
ecl8_03990	yaiY	Inner membrane protein YaiY	-0.515812	5.18422	0.283554	0.914026
ecl8_01936	pth	Peptidyl-tRNA hydrolase	-0.515431	4.68264	0.251593	0.895174
ecl8_02775	feaB_1	Phenylacetaldehyde dehydrogenase	-0.514288	7.55301	0.0363728	0.42209
ecl8_01210	trxC	Thioredoxin 2	-0.513535	6.65764	0.0880982	0.641989
ecl8_01421	ecl8_01421	hypothetical protein	-0.512778	6.64348	0.0792389	0.615193
ecl8_04515	iolB	5-deoxy-glucuronate isomerase	-0.512526	7.16812	0.0328351	0.397391
ecl8_03184	mgsA	Methylglyoxal synthase	-0.511813	6.91564	0.0748988	0.60325
ecl8_05153	ecl8_05153	hypothetical protein	-0.511466	6.15129	0.184298	0.839766
ecl8_00729	ecl8_00729	hypothetical protein	-0.511442	5.88306	0.171512	0.824676
ecl8_03567	rnk	Regulator of nucleoside diphosphate kinase	-0.509078	5.53865	0.198917	0.855367
ecl8_03350	rimO_3	Ribosomal protein S12 methylthiotransferase RimO	-0.507991	7.639	0.0508865	0.518561
ecl8_00100	glpK_1	Glycerol kinase	-0.50745	7.95779	0.0235617	0.325407
ecl8_02552	efe_2	2-oxoglutarate-dependent ethylene/succinate-forming enzyme	-0.506169	6.75448	0.0751269	0.60325
ecl8_01249	ecl8_01249	hypothetical protein	-0.505402	6.70078	0.0778617	0.614212
ecl8_03280	artJ_2	ABC transporter arginine-binding protein 1	-0.503941	6.22139	0.131485	0.753801
ecl8_04727	soxS_3	Regulatory protein SoxS	-0.50381	6.29428	0.12495	0.743398
ecl8_03291	nfsA	Oxygen-insensitive NADPH nitroreductase	-0.503581	6.91283	0.0685162	0.585249
ecl8_02179	ecl8_02179	hypothetical protein	-0.502452	6.57577	0.0919275	0.658527
ecl8_01623	thiM	Hydroxyethylthiazole kinase	-0.501192	6.30999	0.121269	0.732871
ecl8_00466	aaeX	Protein AaeX	-0.501	6.15176	0.221523	0.873838
ecl8_03348	ecl8_03348	hypothetical protein	-0.500747	5.73393	0.182463	0.839754
ecl8_04329	serB	Phosphoserine phosphatase	-0.497414	6.95523	0.0656882	0.580962
ecl8_00940	cbiL	Cobalt-precorrin-2 C(20)-methyltransferase	-0.497309	6.89652	0.0588647	0.550241
ecl8_03588	ecl8_03588	hypothetical protein	-0.497094	7.49266	0.0375905	0.429069
ecl8_00265	nikR	Nickel-responsive regulator	-0.496171	6.63772	0.164871	0.815526
ecl8_02729	proP_1	Proline/betaine transporter	-0.495888	7.12362	0.0523563	0.52551
ecl8_02414	dgcM_1	Diguanylate cyclase DgcM	-0.495454	7.20996	0.0658666	0.581422
ecl8_02980	umuC_1	Protein UmuC	-0.494641	7.47448	0.0255206	0.342184
ecl8_00157	grxC	Glutaredoxin 3	-0.494476	6.20674	0.155315	0.800789
ecl8_02560	yhhS_2	putative MFS-type transporter YhhS	-0.49347	7.59336	0.0240086	0.329006
ecl8_02181	oppF_4	Oligopeptide transport ATP-binding protein OppF	-0.490398	7.00646	0.0703764	0.591672
ecl8_01027	ecl8_01027	hypothetical protein	-0.489201	5.66707	0.207688	0.862834
ecl8_00999	cysJ	Sulfite reductase [NADPH] flavoprotein alpha-component	-0.488937	8.10191	0.0147841	0.232004
ecl8_02077	mhpF	Acetaldehyde dehydrogenase	-0.48789	6.68973	0.0807698	0.616463
ecl8_02885	pyrF	Orotidine 5'-phosphate decarboxylase	-0.487642	6.84531	0.079304	0.615193
ecl8_03636	betI_3	HTH-type transcriptional regulator BetI	-0.487047	6.15143	0.174774	0.828643
ecl8_01750	acuI	putative acrylyl-CoA reductase AcuI	-0.486152	7.15228	0.0480269	0.499719
ecl8_02400	dipZ_2	Protein DipZ	-0.485508	6.06361	0.206063	0.85972
ecl8_02017	dadA_2	D-amino acid dehydrogenase	-0.48498	7.82788	0.0177255	0.259523
ecl8_00726	yggR	putative protein YggR	-0.482427	8.57611	0.0320275	0.391206
ecl8_01830	yebE	Inner membrane protein YebE	-0.481323	6.56853	0.110667	0.711135
ecl8_00713	yggX	putative Fe(2+)-trafficking protein	-0.481166	5.1862	0.241019	0.890743
ecl8_01748	ecl8_01748	Thermostable monoacylglycerol lipase	-0.480179	8.17141	0.00984209	0.175441
ecl8_02390	skfB	Sporulation killing factor maturation protein SkfB	-0.478866	7.46148	0.0308939	0.38431
ecl8_04857	tatA	Sec-independent protein translocase protein TatA	-0.477635	6.01469	0.244953	0.893515
ecl8_05185	pcoC	Copper resistance protein C	-0.477629	6.33989	0.184436	0.839766
ecl8_02350	gsiC_3	Glutathione transport system permease protein GsiC	-0.47571	6.79718	0.107129	0.701048
ecl8_03658	oppD_4	Oligopeptide transport ATP-binding protein OppD	-0.47531	6.64531	0.204315	0.855953
ecl8_02298	rihA	Pyrimidine-specific ribonucleoside hydrolase RihA	-0.474797	6.66568	0.155142	0.800789
ecl8_02280	ecl8_02280	hypothetical protein	-0.474525	5.61838	0.304148	0.923093
ecl8_02269	ecl8_02269	hypothetical protein	-0.474422	7.00785	0.0637618	0.577245
ecl8_00978	sdaC_1	Serine transporter	-0.473575	8.13847	0.0155012	0.238428
ecl8_04264	lptD	LPS-assembly protein LptD	-0.473093	4.99877	0.253585	0.895174
ecl8_03471	cpoB	Cell division coordinator CpoB	-0.472649	6.74224	0.129817	0.750696
ecl8_00847	ecl8_00847	hypothetical protein	-0.472374	7.54266	0.0405952	0.454252
ecl8_03225	ecl8_03225	hypothetical protein	-0.470096	6.51164	0.116731	0.722544
ecl8_01431	ecl8_01431	hypothetical protein	-0.469882	9.61231	0.0458765	0.487539
ecl8_02744	ecl8_02744	hypothetical protein	-0.469133	7.10587	0.0540769	0.530294
ecl8_05231	ecl8_05231	putative oxidoreductase/MSMEI_2347	-0.468951	7.41257	0.0656578	0.580962
ecl8_01929	ecl8_01929	hypothetical protein	-0.468484	7.18125	0.0804936	0.616463
ecl8_01955	nrtA	Nitrate transport protein NrtA	-0.468476	6.58659	0.106839	0.700979
ecl8_02582	dtnK	D-threonate kinase	-0.46803	7.17998	0.0740071	0.60134
ecl8_01064	hypC	Hydrogenase maturation factor HypC	-0.467369	5.65157	0.243474	0.892325
ecl8_01512	pncC_2	Nicotinamide-nucleotide amidohydrolase PncC	-0.46617	7.09451	0.104996	0.696793
ecl8_02085	glpE_2	Thiosulfate sulfurtransferase GlpE	-0.466092	7.63994	0.0391763	0.441598
ecl8_05258	ecl8_05258	hypothetical protein	-0.465241	7.10771	0.0662664	0.58383
ecl8_01845	msrC	Free methionine-R-sulfoxide reductase	-0.465128	6.52931	0.119407	0.729287
ecl8_03362	ybiU	putative protein YbiU	-0.464312	6.9059	0.0956379	0.668742
ecl8_04707	ompR_3	Transcriptional regulatory protein OmpR	-0.463218	6.76671	0.145445	0.78058
ecl8_01088	ecl8_01088	hypothetical protein	-0.46295	6.00149	0.253558	0.895174
ecl8_01428	ecl8_01428	hypothetical protein	-0.462513	9.16331	0.0953226	0.668742
ecl8_02258	gbpR_2	HTH-type transcriptional regulator GbpR	-0.460032	7.42552	0.0686567	0.585249
ecl8_02973	ecl8_02973	hypothetical protein	-0.458985	6.97158	0.147783	0.786093
ecl8_02057	sufE	Cysteine desulfuration protein SufE	-0.45798	6.14117	0.266822	0.902049
ecl8_00831	ecl8_00831	hypothetical protein	-0.457564	5.56485	0.262553	0.900168
ecl8_02311	ecl8_02311	hypothetical protein	-0.457538	5.4933	0.247793	0.895174
ecl8_02939	astB_2	N-succinylarginine dihydrolase	-0.45704	7.21678	0.0675771	0.585249
ecl8_03624	glpK_2	Glycerol kinase	-0.456873	7.62987	0.0434106	0.473093
ecl8_03905	queC	7-cyano-7-deazaguanine synthase	-0.456519	6.91113	0.163726	0.815526
ecl8_04035	artQ_3	Arginine transport system permease protein ArtQ	-0.455876	6.93006	0.132433	0.754011
ecl8_03517	ecl8_03517	hypothetical protein	-0.455152	5.9417	0.235873	0.887548
ecl8_00686	ecl8_00686	hypothetical protein	-0.455035	5.83307	0.282535	0.914026
ecl8_04168	thpR	RNA 2',3'-cyclic phosphodiesterase	-0.454956	6.48801	0.14026	0.772311
ecl8_02409	tenA_1	Aminopyrimidine aminohydrolase	-0.454897	6.68666	0.102236	0.691804
ecl8_03894	atl	DNA base-flipping protein	-0.454408	4.84934	0.294812	0.920456
ecl8_03872	ylaC	Inner membrane protein YlaC	-0.45389	5.89143	0.225119	0.87954
ecl8_01220	rseC	Protein RseC	-0.453787	6.17381	0.201162	0.855367
ecl8_01001	cysH_1	Phosphoadenosine phosphosulfate reductase	-0.452837	6.87146	0.103489	0.69279
ecl8_04455	ecl8_04455	hypothetical protein	-0.451892	7.42209	0.0598767	0.557492
ecl8_02391	pqqCD	Bifunctional coenzyme PQQ synthesis protein C/D	-0.451147	5.54376	0.249783	0.895174
ecl8_02103	ecl8_02103	hypothetical protein	-0.449008	7.06779	0.112503	0.712671
ecl8_04824	rpoC	DNA-directed RNA polymerase subunit beta'	-0.448986	5.42547	0.250226	0.895174
ecl8_00166	lldP	L-lactate permease	-0.448224	9.16463	0.0172224	0.255502
ecl8_02360	ecl8_02360	hypothetical protein	-0.447698	6.48252	0.141531	0.773136
ecl8_02513	ecl8_02513	6-deoxy-6-sulfogluconolactonase	-0.447297	6.5382	0.177051	0.831553
ecl8_04713	yjcH	Inner membrane protein YjcH	-0.446942	5.94503	0.298086	0.920456
ecl8_00926	pduA_2	Propanediol utilization protein PduA	-0.446878	9.25519	0.0258218	0.345216
ecl8_03229	ecl8_03229	hypothetical protein	-0.446517	7.12682	0.117907	0.723007
ecl8_01766	yedA_1	putative inner membrane transporter YedA	-0.446332	7.63083	0.0465157	0.488415
ecl8_02756	paaE	1,2-phenylacetyl-CoA epoxidase, subunit E	-0.446128	6.33953	0.165446	0.815526
ecl8_05113	ecl8_05113	hypothetical protein	-0.44608	6.3319	0.178462	0.831557
ecl8_03127	efeB	Deferrochelatase/peroxidase EfeB	-0.444768	7.31399	0.0733512	0.599035
ecl8_03390	rhlE	ATP-dependent RNA helicase RhlE	-0.444513	7.9472	0.0519184	0.522478
ecl8_03068	ecl8_03068	hypothetical protein	-0.443312	6.23642	0.213896	0.867398
ecl8_01698	yhaJ_2	HTH-type transcriptional regulator YhaJ	-0.442685	5.93561	0.2526	0.895174
ecl8_00178	ecl8_00178	hypothetical protein	-0.441126	7.82894	0.0331328	0.398679
ecl8_03602	ecl8_03602	hypothetical protein	-0.440278	5.56942	0.332832	0.948096
ecl8_00876	lysA	Diaminopimelate decarboxylase	-0.439687	7.9428	0.0228367	0.319228
ecl8_02442	glvR_3	HTH-type transcriptional regulator GlvR	-0.439562	7.04016	0.0972421	0.674534
ecl8_03099	pyrC	Dihydroorotase	-0.438577	7.64614	0.0544504	0.530804
ecl8_04344	holD	DNA polymerase III subunit psi	-0.437186	4.94264	0.297979	0.920456
ecl8_00603	ygjH	tRNA-binding protein YgjH	-0.435942	5.77499	0.336521	0.948096
ecl8_02297	curA	NADPH-dependent curcumin reductase	-0.435285	7.30626	0.0948957	0.668742
ecl8_02016	rutC_1	Putative aminoacrylate peracid reductase RutC	-0.434882	5.44067	0.304847	0.923578
ecl8_03373	mntR	Transcriptional regulator MntR	-0.434765	6.32214	0.19206	0.852801
ecl8_02964	ecl8_02964	hypothetical protein	-0.434512	5.40587	0.384271	0.956928
ecl8_01705	yeeA	Inner membrane protein YeeA	-0.433833	7.44825	0.17071	0.822951
ecl8_03520	nagB_1	Glucosamine-6-phosphate deaminase	-0.433653	7.47418	0.0560346	0.540258
ecl8_01723	ecl8_01723	hypothetical protein	-0.433525	5.67843	0.319358	0.93609
ecl8_02649	dmsD	Tat proofreading chaperone DmsD	-0.433477	6.13689	0.219482	0.873838
ecl8_00972	metI_1	D-methionine transport system permease protein MetI	-0.433338	6.64025	0.128778	0.749681
ecl8_02080	mhpT_1	3-(3-hydroxy-phenyl)propionate transporter	-0.433289	6.45829	0.253027	0.895174
ecl8_02966	msrB	Peptide methionine sulfoxide reductase MsrB	-0.43247	6.34279	0.255901	0.897395
ecl8_02086	ecl8_02086	3-mercaptopropionate dioxygenase	-0.432046	6.32372	0.197667	0.855367
ecl8_03142	rutG	Putative pyrimidine permease RutG	-0.430786	7.55867	0.072228	0.596485
ecl8_04150	fhuA_3	Ferrichrome outer membrane transporter/phage receptor	-0.43004	9.10108	0.0413634	0.461724
ecl8_05103	ecl8_05103	hypothetical protein	-0.429322	6.85291	0.164741	0.815526
ecl8_01933	thpA_1	D-threitol-binding protein	-0.428998	6.81134	0.138596	0.768882
ecl8_02800	tyrB_1	Aromatic-amino-acid aminotransferase	-0.428131	7.51076	0.0622009	0.56534
ecl8_01762	yedR	Inner membrane protein YedR	-0.427787	6.15258	0.221672	0.873838
ecl8_03158	dmlR_16	HTH-type transcriptional regulator DmlR	-0.427037	7.0156	0.0882229	0.641989
ecl8_02432	fabF_1	3-oxoacyl-[acyl-carrier-protein] synthase 2	-0.425344	7.3951	0.0808278	0.616463
ecl8_02305	pgrR_4	HTH-type transcriptional regulator PgrR	-0.424366	6.75654	0.236335	0.887548
ecl8_04235	leuA_2	2-isopropylmalate synthase	-0.424128	9.01384	0.0512812	0.520521
ecl8_00804	hdeB_3	Acid stress chaperone HdeB	-0.423754	5.208	0.392985	0.956928
ecl8_02445	yecS_3	L-cystine transport system permease protein YecS	-0.42344	6.65446	0.151552	0.795646
ecl8_02386	rhtB_1	Homoserine/homoserine lactone efflux protein	-0.422842	6.79446	0.132079	0.754011
ecl8_01809	yecN	Inner membrane protein YecN	-0.422315	5.71964	0.374975	0.956928
ecl8_02812	ecl8_02812	hypothetical protein	-0.422146	5.76397	0.293902	0.920456
ecl8_02434	emrA_2	Multidrug export protein EmrA	-0.420478	6.67506	0.172391	0.826419
ecl8_03930	ydgJ_3	putative oxidoreductase YdgJ	-0.420216	7.49454	0.115506	0.722544
ecl8_02322	narV	Respiratory nitrate reductase 2 gamma chain	-0.419557	6.75795	0.177705	0.831553
ecl8_01285	ecl8_01285	hypothetical protein	-0.419014	6.08152	0.305927	0.925214
ecl8_02480	frcA_2	Fructose import ATP-binding protein FrcA	-0.417083	6.71508	0.137416	0.766032
ecl8_04856	tatB	Sec-independent protein translocase protein TatB	-0.416874	6.24236	0.218713	0.873838
ecl8_02039	fecE	Fe(3+) dicitrate transport ATP-binding protein FecE	-0.416355	6.46295	0.181939	0.839754
ecl8_03456	galK	Galactokinase	-0.413347	7.21086	0.129677	0.750696
ecl8_03807	ecl8_03807	putative HTH-type transcriptional regulator	-0.413108	4.72622	0.444581	0.97316
ecl8_00937	cbiH	putative cobalt-factor III C(17)-methyltransferase	-0.412795	6.93889	0.11739	0.722544
ecl8_05248	ecl8_05248	hypothetical protein	-0.412175	5.17957	0.35875	0.956928
ecl8_03136	rutA	Pyrimidine monooxygenase RutA	-0.411744	6.53414	0.229019	0.880296
ecl8_03010	ecl8_03010	Manganese catalase	-0.409358	6.94788	0.165245	0.815526
ecl8_01413	ecl8_01413	hypothetical protein	-0.408459	7.36735	0.0845411	0.630153
ecl8_02751	paaJ	3-oxoadipyl-CoA/3-oxo-5,6-dehydrosuberyl-CoA thiolase	-0.408228	7.8105	0.0517291	0.522478
ecl8_03298	ecl8_03298	hypothetical protein	-0.40819	8.61316	0.0274442	0.361383
ecl8_02155	rfnT	Riboflavin transporter RfnT	-0.407538	6.58299	0.16196	0.813202
ecl8_01720	yeaR_1	putative protein YeaR	-0.407123	8.27062	0.0245453	0.331522
ecl8_01609	yehW	Glycine betaine uptake system permease protein YehW	-0.406834	6.75974	0.180297	0.836718
ecl8_02620	otnK	3-oxo-tetronate kinase	-0.406831	7.1496	0.109737	0.710659
ecl8_01551	glcR_1	HTH-type transcriptional repressor GlcR	-0.406736	6.41954	0.201258	0.855367
ecl8_04740	soxS_4	Regulatory protein SoxS	-0.406604	7.54836	0.0761345	0.609167
ecl8_01755	cbl_2	HTH-type transcriptional regulator cbl	-0.406173	7.81679	0.0415898	0.46252
ecl8_01655	dnaK_1	Chaperone protein DnaK	-0.405977	7.13613	0.130353	0.750696
ecl8_02424	ecl8_02424	hypothetical protein	-0.405793	7.38829	0.111639	0.711823
ecl8_01301	gcvR	Glycine cleavage system transcriptional repressor	-0.405745	8.02547	0.0417364	0.46252
ecl8_04819	thiH	2-iminoacetate synthase	-0.405651	8.09396	0.0477775	0.498251
ecl8_04563	mpl	UDP-N-acetylmuramate--L-alanyl-gamma-D-glutamyl- meso-2,6-diaminoheptandioate ligase	-0.40547	8.25608	0.03131	0.387082
ecl8_03634	ivy	Inhibitor of vertebrate lysozyme	-0.405453	7.37615	0.116692	0.722544
ecl8_05239	ecl8_05239	hypothetical protein	-0.404726	5.65443	0.327039	0.944521
ecl8_02213	sodB	Superoxide dismutase [Fe]	-0.404277	6.66888	0.160698	0.8131
ecl8_04726	soxR	Redox-sensitive transcriptional activator SoxR	-0.404063	6.49437	0.201412	0.855367
ecl8_01426	ecl8_01426	hypothetical protein	-0.403928	8.23828	0.0532081	0.527379
ecl8_02152	ecl8_02152	putative MFS-type transporter	-0.402136	7.90489	0.0388569	0.439073
ecl8_02771	ectD	Ectoine dioxygenase	-0.399401	6.12747	0.360168	0.956928
ecl8_00285	zntA	Zinc/cadmium/lead-transporting P-type ATPase	-0.399204	8.58006	0.0359892	0.419023
ecl8_02909	ecl8_02909	hypothetical protein	-0.398892	4.87789	0.34583	0.951283
ecl8_02545	ndmA	Methylxanthine N1-demethylase NdmA	-0.398645	7.20325	0.140875	0.773136
ecl8_03020	pdeH_3	Cyclic di-GMP phosphodiesterase PdeH	-0.398327	6.62547	0.294717	0.920456
ecl8_00712	mltC	Membrane-bound lytic murein transglycosylase C	-0.39803	8.16044	0.0309049	0.38431
ecl8_01633	xylB_3	Xylulose kinase	-0.397729	6.62707	0.283595	0.914026
ecl8_02156	chrB1	Protein ChrB	-0.397493	7.1005	0.138241	0.768882
ecl8_03301	gpFI	Putative prophage major tail sheath protein	-0.396098	7.22425	0.120238	0.730028
ecl8_02614	melY_1	Melibiose permease	-0.395237	6.97491	0.144219	0.780436
ecl8_02894	yciN	Protein YciN	-0.393374	6.24649	0.236746	0.887548
ecl8_02423	pgdA	Peptidoglycan deacetylase	-0.392231	7.28037	0.123656	0.740734
ecl8_02493	pgrR_5	HTH-type transcriptional regulator PgrR	-0.392211	7.72496	0.0578223	0.548298
ecl8_04609	ecl8_04609	hypothetical protein	-0.391782	5.77374	0.309957	0.928946
ecl8_02024	mepS_2	Murein DD-endopeptidase MepS/Murein LD-carboxypeptidase	-0.391732	5.73615	0.334373	0.948096
ecl8_00680	metC_1	Cystathionine beta-lyase MetC	-0.391433	7.93811	0.0673762	0.585249
ecl8_01587	mglB	D-galactose-binding periplasmic protein	-0.391209	8.23673	0.0583816	0.549838
ecl8_02570	ecl8_02570	Aminoglycoside N(6')-acetyltransferase type 1	-0.391091	6.64719	0.206191	0.85972
ecl8_04917	oxyR_5	Hydrogen peroxide-inducible genes activator	-0.390478	7.36587	0.0960321	0.670185
ecl8_02121	ccmC	Heme exporter protein C	-0.390031	6.43511	0.225451	0.87954
ecl8_04218	ftsQ	Cell division protein FtsQ	-0.389959	4.77197	0.442803	0.97316
ecl8_01906	livH_3	High-affinity branched-chain amino acid transport system permease protein LivH	-0.389127	7.50105	0.0807819	0.616463
ecl8_02950	fbpC2	Fe(3+) ions import ATP-binding protein FbpC 2	-0.389041	5.88432	0.279611	0.913954
ecl8_02353	ppa_1	Inorganic pyrophosphatase	-0.388543	6.2974	0.274309	0.906118
ecl8_03363	cytR_2	HTH-type transcriptional repressor CytR	-0.388532	6.91546	0.142262	0.774275
ecl8_01411	ecl8_01411	hypothetical protein	-0.388366	6.31729	0.236191	0.887548
ecl8_03833	purE	N5-carboxyaminoimidazole ribonucleotide mutase	-0.388258	6.48923	0.237392	0.887614
ecl8_01598	bglB	6-phospho-beta-glucosidase BglB	-0.388051	7.60752	0.0911691	0.655136
ecl8_04453	ecl8_04453	hypothetical protein	-0.387941	7.04761	0.127564	0.747348
ecl8_02088	msuD_2	Methanesulfonate monooxygenase	-0.387136	7.02792	0.136737	0.765027
ecl8_01429	ecl8_01429	hypothetical protein	-0.387093	6.7928	0.276803	0.909392
ecl8_03345	dacC	D-alanyl-D-alanine carboxypeptidase DacC	-0.386859	7.29791	0.0993795	0.686256
ecl8_02072	yiaJ	DNA-binding transcriptional repressor YiaJ	-0.386216	6.36518	0.229627	0.880296
ecl8_03377	rhtA	Threonine/homoserine exporter RhtA	-0.386198	6.9115	0.165831	0.816255
ecl8_04188	speE	Polyamine aminopropyltransferase	-0.385914	7.42874	0.10109	0.68876
ecl8_01650	dctA_2	C4-dicarboxylate transport protein	-0.384864	8.32658	0.0537102	0.528937
ecl8_01404	ecl8_01404	hypothetical protein	-0.384699	9.05163	0.160758	0.8131
ecl8_04081	yafV	Omega-amidase YafV	-0.384644	6.15252	0.293543	0.920456
ecl8_01464	cvpA	Colicin V production protein	-0.384152	6.30463	0.244328	0.893515
ecl8_01724	cpo	Non-heme chloroperoxidase	-0.383285	7.22466	0.138497	0.768882
ecl8_04110	arfB	Peptidyl-tRNA hydrolase ArfB	-0.382588	6.51602	0.202887	0.855953
ecl8_02150	ecl8_02150	hypothetical protein	-0.382112	5.25646	0.359036	0.956928
ecl8_04383	lhpD	Delta(1)-pyrroline-2-carboxylate/Delta(1)- piperideine-2-carboxylate reductase	-0.381457	7.27843	0.10643	0.700244
ecl8_03444	ariR	putative two-component-system connector protein AriR	-0.381151	6.81656	0.201187	0.855367
ecl8_00957	ecl8_00957	hypothetical protein	-0.380926	6.77218	0.210663	0.865831
ecl8_02829	ecl8_02829	hypothetical protein	-0.380678	6.84266	0.177399	0.831553
ecl8_02101	artQ_1	Arginine transport system permease protein ArtQ	-0.380604	7.2656	0.121949	0.735048
ecl8_03515	chiQ	putative lipoprotein ChiQ	-0.379569	6.08616	0.276316	0.909392
ecl8_02082	ecl8_02082	hypothetical protein	-0.378246	5.52454	0.331724	0.947577
ecl8_01307	ecl8_01307	hypothetical protein	-0.378163	6.83697	0.156686	0.803342
ecl8_01690	hisF	Imidazole glycerol phosphate synthase subunit HisF	-0.378008	6.53644	0.47586	0.981867
ecl8_02794	ydgJ_2	putative oxidoreductase YdgJ	-0.3778	7.5745	0.0790977	0.615193
ecl8_01864	nudL	putative Nudix hydrolase NudL	-0.377328	5.72285	0.381516	0.956928
ecl8_03606	entH	Proofreading thioesterase EntH	-0.377155	5.82893	0.319243	0.93609
ecl8_02741	emrK_2	putative multidrug resistance protein EmrK	-0.376714	7.15464	0.177804	0.831553
ecl8_04779	ecl8_04779	hypothetical protein	-0.376682	5.73187	0.316816	0.93378
ecl8_02097	feuC_1	Iron-uptake system permease protein FeuC	-0.376527	7.03165	0.136026	0.762908
ecl8_00251	adh1_1	Long-chain-alcohol dehydrogenase 1	-0.375931	7.69851	0.0825926	0.620659
ecl8_01691	hisA	1-(5-phosphoribosyl)-5-[(5- phosphoribosylamino)methylideneamino] imidazole-4-carboxamide isomerase	-0.375593	6.3177	0.336001	0.948096
ecl8_01236	glrR	Transcriptional regulatory protein GlrR	-0.375445	7.84698	0.0940587	0.666527
ecl8_05260	repB_2	RepFIB replication protein A	-0.374566	7.07232	0.146251	0.78058
ecl8_01651	ecl8_01651	hypothetical protein	-0.374243	8.20897	0.045841	0.487539
ecl8_03452	modE	Transcriptional regulator ModE	-0.374077	7.22095	0.141606	0.773136
ecl8_01164	ecl8_01164	hypothetical protein	-0.373731	7.16634	0.161549	0.813202
ecl8_03419	bioC	Malonyl-[acyl-carrier protein] O-methyltransferase	-0.372925	6.30189	0.284594	0.915279
ecl8_01938	nolA	Nodulation protein NolA	-0.372448	7.51845	0.090586	0.652986
ecl8_02314	fliY_3	L-cystine-binding protein FliY	-0.372303	6.74882	0.202558	0.855953
ecl8_03715	fhuC_2	Iron(3+)-hydroxamate import ATP-binding protein FhuC	-0.372272	6.81547	0.160547	0.8131
ecl8_00623	hdeD_1	Protein HdeD	-0.372193	9.35718	0.0646922	0.578943
ecl8_04919	ilvD	Dihydroxy-acid dehydratase	-0.371482	8.98447	0.100843	0.68876
ecl8_00298	panM	PanD regulatory factor	-0.369794	6.32564	0.254016	0.895872
ecl8_03730	iolU_2	scyllo-inositol 2-dehydrogenase (NADP(+)) IolU	-0.369791	6.75074	0.187869	0.847069
ecl8_02884	yciH	putative protein YciH	-0.36943	6.3765	0.248984	0.895174
ecl8_01601	yohC	Inner membrane protein YohC	-0.368723	7.02562	0.165097	0.815526
ecl8_01786	dapA_2	4-hydroxy-tetrahydrodipicolinate synthase	-0.368546	6.74223	0.176047	0.831553
ecl8_03374	mntS	Small protein MntS	-0.368465	5.38473	0.389811	0.956928
ecl8_03331	ecl8_03331	hypothetical protein	-0.368159	5.17135	0.389573	0.956928
ecl8_04795	metAS	Homoserine O-succinyltransferase	-0.368007	7.38216	0.13697	0.765403
ecl8_04916	ilvC	Ketol-acid reductoisomerase (NADP(+))	-0.367974	8.49137	0.0665036	0.584799
ecl8_00050	phnV_1	Putative 2-aminoethylphosphonate transport system permease protein PhnV	-0.367737	6.90632	0.251169	0.895174
ecl8_01802	yagG_2	Putative glycoside/cation symporter YagG	-0.367431	8.39025	0.0673708	0.585249
ecl8_00777	nlpD_1	Murein hydrolase activator NlpD	-0.367302	6.98115	0.169426	0.821259
ecl8_02954	gdhA_2	NADP-specific glutamate dehydrogenase	-0.367234	7.36772	0.112047	0.711823
ecl8_01863	sdaA	L-serine dehydratase 1	-0.367222	7.70224	0.0926892	0.660895
ecl8_00384	fkpA_1	FKBP-type peptidyl-prolyl cis-trans isomerase FkpA	-0.367192	8.63043	0.0541288	0.530294
ecl8_01761	ompN_1	Outer membrane protein N	-0.366508	9.37363	0.0505438	0.517708
ecl8_02285	ydcV_1	Inner membrane ABC transporter permease protein YdcV	-0.365785	6.2617	0.276832	0.909392
ecl8_01006	cysC	Adenylyl-sulfate kinase	-0.365563	7.29489	0.227882	0.880296
ecl8_02613	lacY	Lactose permease	-0.365497	7.37677	0.117346	0.722544
ecl8_01283	ecl8_01283	hypothetical protein	-0.365076	8.14718	0.0670413	0.585249
ecl8_03665	bepG	Efflux pump membrane transporter BepG	-0.364758	8.48373	0.0806364	0.616463
ecl8_02326	narU	Nitrate/nitrite transporter NarU	-0.364575	8.3206	0.0722423	0.596485
ecl8_01801	uspC	Universal stress protein C	-0.364433	6.06046	0.375102	0.956928
ecl8_02924	ydjM	Inner membrane protein YdjM	-0.364339	6.6414	0.240888	0.890743
ecl8_03999	tauB	Taurine import ATP-binding protein TauB	-0.364014	6.93618	0.191764	0.852801
ecl8_00202	ecl8_00202	hypothetical protein	-0.363688	8.07606	0.0644268	0.578943
ecl8_00825	arsC	Arsenate reductase	-0.363331	6.00733	0.377639	0.956928
ecl8_00922	pduE_2	Propanediol dehydratase small subunit	-0.363204	6.71313	0.201268	0.855367
ecl8_02905	trpGD	Bifunctional protein TrpGD	-0.36206	8.40692	0.0641652	0.578619
ecl8_02069	ecl8_02069	putative ABC transporter ATP-binding protein	-0.361612	6.56851	0.24756	0.895174
ecl8_03238	ecl8_03238	hypothetical protein	-0.360112	7.57348	0.124119	0.742295
ecl8_02231	mliC	Membrane-bound lysozyme inhibitor of C-type lysozyme	-0.359671	5.31218	0.39813	0.956928
ecl8_02719	ydfZ	Putative selenoprotein YdfZ	-0.359393	5.3557	0.393563	0.956928
ecl8_02184	gsiC_2	Glutathione transport system permease protein GsiC	-0.357895	6.71241	0.20047	0.855367
ecl8_01792	hsrA_2	putative transport protein HsrA	-0.357889	7.68126	0.116954	0.722544
ecl8_02815	bdcR	HTH-type transcriptional repressor BdcR	-0.357837	5.69645	0.405276	0.957506
ecl8_00073	ecl8_00073	hypothetical protein	-0.357717	6.50973	0.294521	0.920456
ecl8_02383	mgtC	Protein MgtC	-0.357672	7.26729	0.169466	0.821259
ecl8_01229	murR	HTH-type transcriptional regulator MurR	-0.3565	6.68576	0.294605	0.920456
ecl8_03352	gsiD_2	Glutathione transport system permease protein GsiD	-0.356207	6.68422	0.218218	0.873838
ecl8_01695	hisD	Histidinol dehydrogenase	-0.35582	7.63452	0.242887	0.892325
ecl8_02124	ecl8_02124	hypothetical protein	-0.355691	5.05781	0.415756	0.958111
ecl8_03197	uup	ABC transporter ATP-binding protein uup	-0.353793	7.88711	0.0690175	0.585598
ecl8_01092	srlA	PTS system glucitol/sorbitol-specific EIIC component	-0.353596	6.4132	0.252542	0.895174
ecl8_02517	mmsB_2	putative 3-hydroxyisobutyrate dehydrogenase	-0.353003	6.72072	0.240158	0.890743
ecl8_04939	oxyR_6	Hydrogen peroxide-inducible genes activator	-0.350834	7.14071	0.266402	0.902049
ecl8_02587	yhcH	putative protein YhcH	-0.350574	6.51194	0.262025	0.900168
ecl8_02194	ecl8_02194	hypothetical protein	-0.350417	5.78759	0.355416	0.954765
ecl8_02170	ecl8_02170	hypothetical protein	-0.349739	6.27317	0.282414	0.914026
ecl8_02919	pfeA_1	Ferric enterobactin receptor	-0.349305	8.67384	0.0892432	0.647365
ecl8_01267	pbpC	Penicillin-binding protein 1C	-0.347883	7.12007	0.19448	0.854264
ecl8_03414	basS	Sensor protein BasS	-0.347486	7.58808	0.1823	0.839754
ecl8_02694	abgB	p-aminobenzoyl-glutamate hydrolase subunit B	-0.34724	7.5831	0.1264	0.745274
ecl8_02681	fumB	Fumarate hydratase class I, anaerobic	-0.346573	7.6887	0.132697	0.754011
ecl8_01602	pbpG	D-alanyl-D-alanine endopeptidase	-0.34463	7.11373	0.191247	0.852801
ecl8_01915	cynR_3	HTH-type transcriptional regulator CynR	-0.344518	7.3466	0.184439	0.839766
ecl8_01079	ascG_3	HTH-type transcriptional regulator AscG	-0.344399	7.61044	0.148087	0.786093
ecl8_05202	ecl8_05202	hypothetical protein	-0.344296	7.80199	0.0838162	0.626782
ecl8_02299	ecl8_02299	hypothetical protein	-0.344254	5.07881	0.443678	0.97316
ecl8_03607	entA_2	2,3-dihydro-2,3-dihydroxybenzoate dehydrogenase	-0.34373	6.55677	0.388777	0.956928
ecl8_02762	maoA	Primary amine oxidase	-0.343612	7.94321	0.0935958	0.66595
ecl8_01530	atoA	Acetate CoA-transferase subunit beta	-0.343261	6.17794	0.479321	0.981867
ecl8_00199	cspA	Cold shock protein CspA	-0.342644	6.57677	0.236993	0.887548
ecl8_02708	ecl8_02708	hypothetical protein	-0.342428	5.27638	0.42518	0.96259
ecl8_04677	ecl8_04677	hypothetical protein	-0.341804	6.94249	0.204813	0.857084
ecl8_04536	ridA_1	2-iminobutanoate/2-iminopropanoate deaminase	-0.341719	5.94563	0.338436	0.948096
ecl8_03420	bioF	8-amino-7-oxononanoate synthase	-0.341308	6.96416	0.229598	0.880296
ecl8_01455	yfcJ	putative MFS-type transporter YfcJ	-0.341153	7.28765	0.145734	0.78058
ecl8_04328	radA	DNA repair protein RadA	-0.341024	7.98736	0.0781523	0.615193
ecl8_02977	sotB_2	Sugar efflux transporter B	-0.340718	6.67781	0.258836	0.898475
ecl8_02282	spuE	Spermidine-binding periplasmic protein SpuE	-0.340645	8.52325	0.0729903	0.599035
ecl8_03031	ecl8_03031	hypothetical protein	-0.340421	6.28385	0.334155	0.948096
ecl8_01324	eutN	Ethanolamine utilization protein EutN	-0.339926	5.60826	0.385504	0.956928
ecl8_00976	ssuA_1	Putative aliphatic sulfonates-binding protein	-0.339762	7.43424	0.151364	0.795646
ecl8_02055	sufD	FeS cluster assembly protein SufD	-0.339397	7.21565	0.193633	0.854264
ecl8_02978	butA	Diacetyl reductase [(S)-acetoin forming]	-0.339201	6.56874	0.267994	0.902049
ecl8_02878	ecl8_02878	hypothetical protein	-0.338599	5.84764	0.407393	0.957506
ecl8_00351	ecl8_00351	hypothetical protein	-0.338594	6.76607	0.240656	0.890743
ecl8_00560	garK_1	Glycerate 2-kinase	-0.337547	7.28495	0.257008	0.897395
ecl8_00167	yibL	putative protein YibL	-0.337428	6.47044	0.303514	0.923093
ecl8_01435	ecl8_01435	hypothetical protein	-0.336808	9.29154	0.0607856	0.558517
ecl8_02811	ecl8_02811	hypothetical protein	-0.33663	6.83476	0.214157	0.867398
ecl8_01097	pncC_1	Nicotinamide-nucleotide amidohydrolase PncC	-0.336349	5.89846	0.366053	0.956928
ecl8_01378	ypdA	Sensor histidine kinase YpdA	-0.336052	8.66631	0.0720848	0.596485
ecl8_02678	apbE_2	FAD:protein FMN transferase	-0.33605	6.77184	0.272024	0.906051
ecl8_00881	ecl8_00881	hypothetical protein	-0.335507	6.31707	0.30469	0.923578
ecl8_04202	ampE	Protein AmpE	-0.335459	7.88534	0.292878	0.920456
ecl8_03693	yncE_2	putative protein YncE	-0.334784	8.28124	0.11752	0.722544
ecl8_02023	btuD	Vitamin B12 import ATP-binding protein BtuD	-0.334613	6.93328	0.19416	0.854264
ecl8_02291	vdh	Vanillin dehydrogenase	-0.334596	7.60067	0.164051	0.815526
ecl8_02496	ecl8_02496	Lactonase drp35	-0.334277	6.67731	0.249625	0.895174
ecl8_04000	tauA	Taurine-binding periplasmic protein	-0.333518	7.81982	0.112227	0.711903
ecl8_03369	ybiS	putative L,D-transpeptidase YbiS	-0.333385	8.04164	0.131616	0.753801
ecl8_01639	ddpC_2	putative D,D-dipeptide transport system permease protein DdpC	-0.332953	6.63976	0.280871	0.914026
ecl8_02339	fdnG_1	Formate dehydrogenase, nitrate-inducible, major subunit	-0.332478	6.3502	0.330934	0.947085
ecl8_02832	clpV1	Protein ClpV1	-0.332383	8.51672	0.0806323	0.616463
ecl8_04509	iolE_4	Inosose dehydratase	-0.331844	7.27727	0.250621	0.895174
ecl8_01176	bamE_1	Outer membrane protein assembly factor BamE	-0.331717	5.62317	0.501632	0.981867
ecl8_01898	ecl8_01898	hypothetical protein	-0.331189	6.72599	0.270183	0.904347
ecl8_02764	ecl8_02764	hypothetical protein	-0.330871	6.68091	0.263449	0.900819
ecl8_02047	cnrA	Nickel and cobalt resistance protein CnrA	-0.330757	7.85844	0.0965393	0.672704
ecl8_01422	ecl8_01422	hypothetical protein	-0.330497	7.30473	0.169169	0.821259
ecl8_00967	zraR_1	Transcriptional regulatory protein ZraR	-0.329978	7.96474	0.118571	0.725143
ecl8_03269	ltaE	Low specificity L-threonine aldolase	-0.329881	7.10651	0.209146	0.865831
ecl8_02571	uxaB	Altronate oxidoreductase	-0.329881	7.88448	0.111441	0.711823
ecl8_02238	nth	Endonuclease III	-0.329794	7.79548	0.120473	0.730028
ecl8_02347	luxA	Alkanal monooxygenase alpha chain	-0.328603	6.93274	0.204276	0.855953
ecl8_00362	nirD	Nitrite reductase (NADH) small subunit	-0.327895	5.1332	0.440207	0.970524
ecl8_04714	actP	Cation/acetate symporter ActP	-0.327196	8.48272	0.100225	0.68876
ecl8_03307	ecl8_03307	hypothetical protein	-0.327138	6.84682	0.322133	0.937621
ecl8_03979	aroL	Shikimate kinase 2	-0.327038	6.7201	0.248017	0.895174
ecl8_04046	accC_2	Biotin carboxylase	-0.326789	8.12659	0.105415	0.697925
ecl8_01313	nudK_1	GDP-mannose pyrophosphatase NudK	-0.326773	6.33876	0.377236	0.956928
ecl8_01039	hmuU_1	Hemin transport system permease protein HmuU	-0.326267	7.16608	0.178184	0.831553
ecl8_03066	ecl8_03066	hypothetical protein	-0.326208	6.2175	0.354397	0.953698
ecl8_01112	nimR_1	HTH-type transcriptional regulator NimR	-0.325803	5.81042	0.383477	0.956928
ecl8_05245	ecl8_05245	hypothetical protein	-0.325706	7.20903	0.202171	0.855367
ecl8_02264	mdoD	Glucans biosynthesis protein D	-0.325554	8.10643	0.0870473	0.638797
ecl8_01511	ecl8_01511	hypothetical protein	-0.324945	6.85363	0.228833	0.880296
ecl8_01730	aaeB_2	p-hydroxybenzoic acid efflux pump subunit AaeB	-0.324813	10.0536	0.0734289	0.599035
ecl8_03165	pdeG_2	putative cyclic di-GMP phosphodiesterase PdeG	-0.324589	5.50963	0.422558	0.961926
ecl8_04008	livH_6	High-affinity branched-chain amino acid transport system permease protein LivH	-0.323275	6.96932	0.246887	0.895174
ecl8_02558	ecl8_02558	hypothetical protein	-0.322674	7.39192	0.165258	0.815526
ecl8_04253	araB_2	Ribulokinase	-0.321934	8.25829	0.100945	0.68876
ecl8_01238	hmp	Flavohemoprotein	-0.321347	7.60232	0.151918	0.79666
ecl8_02348	gsiA_1	Glutathione import ATP-binding protein GsiA	-0.321276	8.04398	0.0946761	0.668742
ecl8_03798	ecl8_03798	hypothetical protein	-0.319612	6.6873	0.257475	0.897395
ecl8_03295	aspT_2	Aspartate/alanine antiporter	-0.319532	8.81846	0.0793423	0.615193
ecl8_02705	folM	Dihydromonapterin reductase	-0.318529	6.62674	0.27337	0.906118
ecl8_01408	ecl8_01408	hypothetical protein	-0.317562	6.09023	0.436151	0.968722
ecl8_03749	ecl8_03749	hypothetical protein	-0.317011	5.70901	0.472464	0.9813
ecl8_00033	ecl8_00033	hypothetical protein	-0.316947	5.81668	0.480346	0.981867
ecl8_03236	aroA	3-phosphoshikimate 1-carboxyvinyltransferase	-0.316203	8.06657	0.104606	0.695609
ecl8_01161	rob_1	Right origin-binding protein	-0.315873	4.91085	0.488024	0.981867
ecl8_02433	emrB_2	Multidrug export protein EmrB	-0.315853	7.9749	0.103293	0.692779
ecl8_02328	smvA_1	Methyl viologen resistance protein SmvA	-0.315695	7.28489	0.204357	0.855953
ecl8_03540	gltK_2	Glutamate/aspartate import permease protein GltK	-0.315257	7.0967	0.358061	0.956928
ecl8_04567	fruK	Fructose import ATP-binding protein FruK	-0.315211	7.92599	0.106846	0.700979
ecl8_04143	ecl8_04143	hypothetical protein	-0.314738	7.05273	0.266493	0.902049
ecl8_02824	ecl8_02824	hypothetical protein	-0.314518	5.40715	0.545073	0.982818
ecl8_01416	ecl8_01416	hypothetical protein	-0.314161	8.99677	0.137239	0.765975
ecl8_01389	ecl8_01389	hypothetical protein	-0.314072	5.80619	0.398914	0.957347
ecl8_02949	ynjC_2	Inner membrane ABC transporter permease protein YnjC	-0.313978	6.74639	0.343558	0.949533
ecl8_03283	rlmC	23S rRNA (uracil(747)-C(5))-methyltransferase RlmC	-0.313903	7.17381	0.268232	0.902049
ecl8_04956	metB	Cystathionine gamma-synthase	-0.313867	8.29992	0.107789	0.704152
ecl8_01634	csbX_2	Alpha-ketoglutarate permease	-0.313831	7.77958	0.125818	0.744524
ecl8_02805	ecl8_02805	2-haloacrylate reductase	-0.313741	7.18621	0.226818	0.87954
ecl8_05154	ecl8_05154	hypothetical protein	-0.312848	5.75401	0.440177	0.970524
ecl8_01918	ecl8_01918	hypothetical protein	-0.312318	7.62728	0.22338	0.875808
ecl8_00577	uxaC	Uronate isomerase	-0.312195	8.14015	0.17059	0.822951
ecl8_04324	trpR	Trp operon repressor	-0.31035	5.9133	0.455597	0.975637
ecl8_03451	acrZ	Multidrug efflux pump accessory protein AcrZ	-0.30913	5.08897	0.472982	0.9813
ecl8_02855	licH_1	putative 6-phospho-beta-glucosidase	-0.309021	7.45863	0.18257	0.839754
ecl8_01423	ecl8_01423	hypothetical protein	-0.309019	7.07465	0.212817	0.86736
ecl8_03145	ecl8_03145	NAD(P)H dehydrogenase (quinone)	-0.308473	6.46954	0.330597	0.947085
ecl8_02659	ecl8_02659	hypothetical protein	-0.308381	7.21928	0.227817	0.880296
ecl8_00672	ftsP	Cell division protein FtsP	-0.30834	8.02645	0.149502	0.790299
ecl8_03925	kstD	3-oxosteroid 1-dehydrogenase	-0.308311	7.72899	0.134184	0.756272
ecl8_02680	ttdT	L-tartrate/succinate antiporter	-0.307844	8.27753	0.109106	0.707725
ecl8_03001	gltC_5	HTH-type transcriptional regulator GltC	-0.307645	6.78474	0.306611	0.925214
ecl8_02674	murQ_2	N-acetylmuramic acid 6-phosphate etherase	-0.307608	7.7681	0.160787	0.8131
ecl8_00720	xylF_2	D-xylose-binding periplasmic protein	-0.307129	7.35246	0.223592	0.875893
ecl8_02972	ecl8_02972	hypothetical protein	-0.306769	7.64878	0.182595	0.839754
ecl8_03981	ecl8_03981	hypothetical protein	-0.30609	6.30382	0.354196	0.953698
ecl8_03265	hcp	Hydroxylamine reductase	-0.305219	8.07018	0.110698	0.711135
ecl8_04693	phnJ	Alpha-D-ribose 1-methylphosphonate 5-phosphate C-P lyase	-0.304972	7.6804	0.233345	0.887548
ecl8_00709	speC	Constitutive ornithine decarboxylase	-0.304831	8.62602	0.120729	0.73057
ecl8_00236	bcsA	Cellulose synthase catalytic subunit [UDP-forming]	-0.304826	9.51262	0.125158	0.743672
ecl8_01440	mlaA	putative phospholipid-binding lipoprotein MlaA	-0.304287	7.37514	0.183106	0.839766
ecl8_01721	yoaG	Protein YoaG	-0.304123	7.39969	0.232806	0.887055
ecl8_02851	ycjG	L-Ala-D/L-Glu epimerase	-0.303022	6.57834	0.363456	0.956928
ecl8_04537	mgtA	Magnesium-transporting ATPase, P-type 1	-0.302377	9.12618	0.101692	0.689797
ecl8_01612	btsR	Transcriptional regulatory protein BtsR	-0.302174	6.71794	0.3038	0.923093
ecl8_01218	rseA	Anti-sigma-E factor RseA	-0.301995	5.63853	0.533728	0.982617
ecl8_02189	rhtC_1	Threonine efflux protein	-0.301917	5.93986	0.510328	0.981867
ecl8_02534	yraI_2	putative fimbrial chaperone YraI	-0.301652	8.39073	0.165288	0.815526
ecl8_01528	atoB	Acetyl-CoA acetyltransferase	-0.301467	7.5042	0.17828	0.831553
ecl8_04420	pcpR_2	PCP degradation transcriptional activation protein	-0.301109	6.81583	0.295867	0.920456
ecl8_04185	ecl8_04185	hypothetical protein	-0.301053	8.21402	0.116565	0.722544
ecl8_01472	ecl8_01472	hypothetical protein	-0.30054	5.49558	0.472621	0.9813
ecl8_03579	ytfQ_1	ABC transporter periplasmic-binding protein YtfQ	-0.300463	8.71209	0.176181	0.831553
ecl8_01897	ecl8_01897	hypothetical protein	-0.300287	7.07942	0.255039	0.896984
ecl8_01379	alaC	Glutamate-pyruvate aminotransferase AlaC	-0.300223	8.34656	0.13979	0.771927
ecl8_01615	apbC	Iron-sulfur cluster carrier protein	-0.299368	6.9062	0.257886	0.897395
ecl8_02006	pfkB	ATP-dependent 6-phosphofructokinase isozyme 2	-0.298496	6.98979	0.247717	0.895174
ecl8_01958	nasD_2	Nitrite reductase [NAD(P)H]	-0.298462	8.68152	0.139169	0.771078
ecl8_03261	macA	Macrolide export protein MacA	-0.298164	7.41945	0.186572	0.842874
ecl8_01432	ecl8_01432	hypothetical protein	-0.297572	9.90011	0.123675	0.740734
ecl8_04708	fdhF_2	Formate dehydrogenase H	-0.297546	6.04697	0.426732	0.963446
ecl8_04444	ecl8_04444	hypothetical protein	-0.297052	6.55289	0.341489	0.948096
ecl8_01124	nrdI	Protein NrdI	-0.296484	6.25792	0.392862	0.956928
ecl8_04130	frr	Ribosome-recycling factor	-0.296433	4.7676	0.50546	0.981867
ecl8_02246	ydgT	Transcription modulator YdgT	-0.296082	7.4447	0.274653	0.906118
ecl8_00471	bhsA_3	Multiple stress resistance protein BhsA	-0.295489	6.36178	0.383112	0.956928
ecl8_03376	ompX	Outer membrane protein X	-0.294923	6.81695	0.265189	0.902049
ecl8_03862	priC	Primosomal replication protein N''	-0.294866	6.09805	0.409365	0.957506
ecl8_03570	ahpC_1	Alkyl hydroperoxide reductase C	-0.294752	6.63646	0.341991	0.948096
ecl8_01607	yehY	Glycine betaine uptake system permease protein YehY	-0.294628	6.79182	0.338887	0.948096
ecl8_02615	recF_2	DNA replication and repair protein RecF	-0.294617	7.15694	0.221737	0.873838
ecl8_03669	ecl8_03669	hypothetical protein	-0.294577	7.89864	0.236628	0.887548
ecl8_01620	ade2	Adenine deaminase 2	-0.294559	7.4969	0.236398	0.887548
ecl8_03956	acpH	Acyl carrier protein phosphodiesterase	-0.294103	6.72817	0.333519	0.948096
ecl8_01334	ecl8_01334	hypothetical protein	-0.293525	7.42637	0.201624	0.855367
ecl8_00761	dsbD_1	Thiol:disulfide interchange protein DsbD	-0.293212	8.19011	0.144364	0.780436
ecl8_00240	pdeK	putative cyclic di-GMP phosphodiesterase PdeK	-0.292951	8.35839	0.144412	0.780436
ecl8_02544	cynR_7	HTH-type transcriptional regulator CynR	-0.29258	6.94585	0.295605	0.920456
ecl8_01042	ecl8_01042	putative hemoglobin and hemoglobin-haptoglobin-binding protein 2	-0.292185	8.45842	0.127393	0.747348
ecl8_01715	yhjE_2	Inner membrane metabolite transport protein YhjE	-0.291746	7.36948	0.237977	0.888357
ecl8_02596	ecl8_02596	hypothetical protein	-0.291673	7.29683	0.2132	0.86736
ecl8_02879	ecl8_02879	hypothetical protein	-0.291404	6.38972	0.346998	0.951497
ecl8_03000	vdcA_1	Diguanylate cyclase VdcA	-0.290822	6.66772	0.295168	0.920456
ecl8_02930	chbR	HTH-type transcriptional regulator ChbR	-0.290781	8.64518	0.110657	0.711135
ecl8_05182	silE_2	Silver-binding protein SilE	-0.290565	6.42474	0.37407	0.956928
ecl8_02721	ecl8_02721	hypothetical protein	-0.290225	5.79486	0.517269	0.981867
ecl8_03706	fabG_15	3-oxoacyl-[acyl-carrier-protein] reductase FabG	-0.289368	6.16031	0.436831	0.968722
ecl8_01371	mntH	Divalent metal cation transporter MntH	-0.289325	7.83419	0.178147	0.831553
ecl8_04950	metF	5,10-methylenetetrahydrofolate reductase	-0.289022	8.06166	0.154688	0.800789
ecl8_05122	flmA	Stable plasmid inheritance protein	-0.288606	5.64965	0.452606	0.975637
ecl8_04401	yjiA	putative GTP-binding protein YjiA	-0.288165	8.3138	0.114294	0.720053
ecl8_03237	serC	Phosphoserine aminotransferase	-0.288096	7.81566	0.170181	0.822576
ecl8_01018	dmlR_5	HTH-type transcriptional regulator DmlR	-0.287975	6.93297	0.301304	0.923093
ecl8_03924	ydiB	Quinate/shikimate dehydrogenase	-0.28768	7.02905	0.290939	0.920456
ecl8_03460	ecl8_03460	hypothetical protein	-0.287037	6.34906	0.388822	0.956928
ecl8_00340	greB	Transcription elongation factor GreB	-0.287002	7.70228	0.348823	0.951504
ecl8_03998	ssuC_3	Putative aliphatic sulfonates transport permease protein SsuC	-0.286805	6.52257	0.330721	0.947085
ecl8_02673	mqo_2	Malate:quinone oxidoreductase	-0.286676	9.27426	0.153505	0.800789
ecl8_00759	msrAB	Peptide methionine sulfoxide reductase MsrA/MsrB	-0.286562	5.99367	0.461205	0.977363
ecl8_04186	ecl8_04186	hypothetical protein	-0.286201	9.09744	0.122496	0.737382
ecl8_01187	ecl8_01187	hypothetical protein	-0.28576	5.95196	0.431836	0.9669
ecl8_01247	ecl8_01247	hypothetical protein	-0.28486	7.23349	0.234406	0.887548
ecl8_04574	tamB	Translocation and assembly module subunit TamB	-0.284691	9.19459	0.168327	0.82093
ecl8_00708	ydfK_1	putative membrane protein YdfK	-0.284642	6.83425	0.29336	0.920456
ecl8_01855	rlmA	23S rRNA (guanine(745)-N(1))-methyltransferase	-0.284562	6.51223	0.365973	0.956928
ecl8_03422	bioA	Adenosylmethionine-8-amino-7-oxononanoate aminotransferase	-0.28422	7.83461	0.175224	0.829925
ecl8_01061	fhlA	Formate hydrogenlyase transcriptional activator	-0.284185	8.68621	0.117049	0.722544
ecl8_02091	ecl8_02091	hypothetical protein	-0.284116	6.83503	0.296615	0.920456
ecl8_02439	atzE	Biuret hydrolase	-0.284105	7.20792	0.243357	0.892325
ecl8_04157	epsF_1	Type II secretion system protein F	-0.284013	7.75053	0.179873	0.835594
ecl8_00727	csgD_1	CsgBAC operon transcriptional regulatory protein	-0.283434	8.98221	0.125432	0.743927
ecl8_01199	yfiH	Polyphenol oxidase	-0.283233	7.38738	0.224997	0.87954
ecl8_00818	kefF_1	Glutathione-regulated potassium-efflux system ancillary protein KefF	-0.282887	7.74898	0.168049	0.820444
ecl8_04657	ecl8_04657	hypothetical protein	-0.28269	7.80998	0.224266	0.877785
ecl8_02054	sufC	putative ATP-dependent transporter SufC	-0.282425	6.84176	0.342447	0.948096
ecl8_01901	tdcC	Threonine/serine transporter TdcC	-0.282395	8.51751	0.134185	0.756272
ecl8_02945	ydjZ_2	TVP38/TMEM64 family inner membrane protein YdjZ	-0.282051	6.88044	0.276754	0.909392
ecl8_00837	fimF_1	Protein FimF	-0.282022	6.8875	0.398244	0.956928
ecl8_01887	ldcA	Murein tetrapeptide carboxypeptidase	-0.281702	5.40237	0.556301	0.982818
ecl8_00244	ecl8_00244	hypothetical protein	-0.281627	8.00862	0.162553	0.813647
ecl8_02842	pgrR_10	HTH-type transcriptional regulator PgrR	-0.281304	7.28647	0.289328	0.920456
ecl8_00422	ecl8_00422	hypothetical protein	-0.281294	6.33974	0.444086	0.97316
ecl8_01154	efe_1	2-oxoglutarate-dependent ethylene/succinate-forming enzyme	-0.281104	7.09473	0.27451	0.906118
ecl8_03689	iolE_2	Inosose dehydratase	-0.280616	7.23018	0.273567	0.906118
ecl8_04250	thiQ	Thiamine import ATP-binding protein ThiQ	-0.280499	7.23686	0.239401	0.890059
ecl8_02396	ompR_2	Transcriptional regulatory protein OmpR	-0.280078	6.61072	0.363617	0.956928
ecl8_01914	ais	Aconitate isomerase	-0.279414	7.11375	0.257916	0.897395
ecl8_00746	argP	HTH-type transcriptional regulator ArgP	-0.279318	7.48924	0.221201	0.873838
ecl8_04330	ytjB	putative inner membrane protein Smp	-0.279304	7.12562	0.271789	0.906051
ecl8_02309	moxC	Putative monooxygenase MoxC	-0.279293	8.79498	0.158835	0.811649
ecl8_01781	uvrC	UvrABC system protein C	-0.278827	8.73066	0.159323	0.8131
ecl8_03446	ybhA	Pyridoxal phosphate phosphatase YbhA	-0.278497	6.2217	0.529943	0.982617
ecl8_01892	ecl8_01892	hypothetical protein	-0.278448	7.61001	0.226754	0.87954
ecl8_04533	tabA	Toxin-antitoxin biofilm protein TabA	-0.278314	6.34096	0.412047	0.957506
ecl8_01624	thiD	Hydroxymethylpyrimidine/phosphomethylpyrimidine kinase	-0.278241	7.01569	0.352762	0.953698
ecl8_04148	fhuD	Iron(3+)-hydroxamate-binding protein FhuD	-0.278133	7.18875	0.321138	0.936334
ecl8_03459	aroG	Phospho-2-dehydro-3-deoxyheptonate aldolase, Phe-sensitive	-0.278117	6.44255	0.381474	0.956928
ecl8_02934	osmE	Osmotically-inducible putative lipoprotein OsmE	-0.277958	6.81418	0.30285	0.923093
ecl8_03200	zapC	Cell division protein ZapC	-0.27764	7.6133	0.220145	0.873838
ecl8_04689	phnF	putative transcriptional regulator PhnF	-0.277273	7.53384	0.22891	0.880296
ecl8_02440	ecl8_02440	hypothetical protein	-0.276804	5.02223	0.522214	0.981867
ecl8_03645	ecl8_03645	hypothetical protein	-0.276802	6.81211	0.346008	0.951283
ecl8_03368	ecl8_03368	hypothetical protein	-0.276774	7.07542	0.283	0.914026
ecl8_04559	pmbA	Metalloprotease PmbA	-0.276689	8.21457	0.141907	0.773261
ecl8_04448	sdh	Serine 3-dehydrogenase	-0.276583	7.43724	0.326979	0.944521
ecl8_02765	argE_2	Acetylornithine deacetylase	-0.276015	6.86369	0.353284	0.953698
ecl8_03783	ecl8_03783	hypothetical protein	-0.27601	6.3994	0.425262	0.96259
ecl8_01848	htpX	Protease HtpX	-0.275991	6.76812	0.333728	0.948096
ecl8_02382	ydjE	Inner membrane metabolite transport protein YdjE	-0.275975	7.61977	0.191944	0.852801
ecl8_00748	serA	D-3-phosphoglycerate dehydrogenase	-0.275774	7.22787	0.2735	0.906118
ecl8_02546	pobB	Phenoxybenzoate dioxygenase subunit beta	-0.275623	6.92741	0.317487	0.934779
ecl8_01417	ecl8_01417	hypothetical protein	-0.275376	8.3399	0.146268	0.78058
ecl8_04481	ecl8_04481	hypothetical protein	-0.275299	5.55772	0.53339	0.982617
ecl8_01916	ecl8_01916	hypothetical protein	-0.274918	7.2389	0.262728	0.900168
ecl8_01965	narK	Nitrate/nitrite transporter NarK	-0.27491	7.94883	0.154065	0.800789
ecl8_00960	fucU	L-fucose mutarotase	-0.274631	6.0205	0.529849	0.982617
ecl8_04546	nrdG	Anaerobic ribonucleoside-triphosphate reductase-activating protein	-0.274415	6.71094	0.395298	0.956928
ecl8_02113	potA_1	Spermidine/putrescine import ATP-binding protein PotA	-0.27415	7.32729	0.300426	0.922952
ecl8_05033	rbsK_3	Ribokinase	-0.2738	6.9528	0.338112	0.948096
ecl8_04390	hpcD	5-carboxymethyl-2-hydroxymuconate Delta-isomerase	-0.273421	5.64818	0.478951	0.981867
ecl8_01959	nasA_1	Nitrate reductase	-0.273147	7.30493	0.304285	0.923093
ecl8_03002	shdC	Phenolic acid decarboxylase subunit C	-0.273117	6.76635	0.324922	0.943027
ecl8_02226	ecl8_02226	hypothetical protein	-0.272894	5.43737	0.510059	0.981867
ecl8_01330	eutB_1	Ethanolamine ammonia-lyase heavy chain	-0.272555	7.27985	0.259651	0.898567
ecl8_03181	rlmI	Ribosomal RNA large subunit methyltransferase I	-0.272352	7.25814	0.253278	0.895174
ecl8_02538	hipA	Serine/threonine-protein kinase toxin HipA	-0.271902	7.50221	0.267831	0.902049
ecl8_03372	ybiR	Inner membrane protein YbiR	-0.271824	7.34769	0.268295	0.902049
ecl8_05207	folE2	GTP cyclohydrolase FolE2	-0.27082	5.86357	0.458675	0.976143
ecl8_01070	hycD	Formate hydrogenlyase subunit 4	-0.270181	7.07748	0.281937	0.914026
ecl8_03844	qmcA	Protein QmcA	-0.269796	7.98438	0.162145	0.813202
ecl8_04285	oadB	Oxaloacetate decarboxylase beta chain	-0.269363	7.50046	0.250102	0.895174
ecl8_01089	srlD	Sorbitol-6-phosphate 2-dehydrogenase	-0.269174	7.40909	0.235497	0.887548
ecl8_00604	patA	Putrescine aminotransferase	-0.268839	8.19603	0.267403	0.902049
ecl8_02168	ecl8_02168	Isoxanthopterin deaminase	-0.268568	7.32959	0.2533	0.895174
ecl8_00600	ebgC	Evolved beta-galactosidase subunit beta	-0.268501	6.11367	0.451478	0.974673
ecl8_01051	hpf_2	Putative metal ABC transporter substrate-binding protein Hpf	-0.268459	7.09496	0.341634	0.948096
ecl8_04561	ecl8_04561	hypothetical protein	-0.268243	7.69716	0.199204	0.855367
ecl8_02040	hmuU_2	Hemin transport system permease protein HmuU	-0.267884	6.81504	0.342626	0.948096
ecl8_02315	gstB_2	Glutathione S-transferase GST-6.0	-0.267287	6.13834	0.472009	0.9813
ecl8_02158	ecl8_02158	putative FAD-linked oxidoreductase	-0.267013	7.33806	0.302689	0.923093
ecl8_02304	ansP2	L-asparagine permease 2	-0.266874	8.06001	0.235756	0.887548
ecl8_02906	trpC	Tryptophan biosynthesis protein TrpCF	-0.266378	7.56017	0.218734	0.873838
ecl8_02668	madD	Malonyl-S-ACP:biotin-protein carboxyltransferase MADD	-0.265523	6.35362	0.406448	0.957506
ecl8_02149	cynR_4	HTH-type transcriptional regulator CynR	-0.265482	7.48605	0.272466	0.906051
ecl8_00611	dhaD	Glycerol dehydrogenase	-0.265284	7.89954	0.238736	0.889306
ecl8_04634	mscM	Miniconductance mechanosensitive channel MscM	-0.265246	9.07961	0.185747	0.842455
ecl8_01021	edcC	Phenolic acid decarboxylase subunit C	-0.265098	8.10107	0.191672	0.852801
ecl8_02212	ydhP_1	Inner membrane transport protein YdhP	-0.264954	7.15821	0.286867	0.91848
ecl8_02819	ecl8_02819	hypothetical protein	-0.264842	7.43474	0.241977	0.891089
ecl8_02337	lvr	Levodione reductase	-0.264592	5.57652	0.493926	0.981867
ecl8_03306	ecl8_03306	hypothetical protein	-0.264501	7.92929	0.238576	0.889306
ecl8_01068	hyfA_1	Hydrogenase-4 component A	-0.263975	6.8564	0.32196	0.937621
ecl8_02413	ccpA_1	Catabolite control protein A	-0.263534	7.27737	0.286988	0.91848
ecl8_03266	hcr	NADH oxidoreductase HCR	-0.263521	7.43666	0.24174	0.891089
ecl8_04985	melY_2	Melibiose permease	-0.263479	7.84917	0.296888	0.920456
ecl8_00609	dhaL	PEP-dependent dihydroxyacetone kinase, ADP-binding subunit DhaL	-0.263195	6.61779	0.415271	0.958111
ecl8_02653	hcaR	Hca operon transcriptional activator HcaR	-0.262925	7.3505	0.293169	0.920456
ecl8_01557	rsuA	Ribosomal small subunit pseudouridine synthase A	-0.262622	5.90445	0.468284	0.980964
ecl8_00822	ecl8_00822	hypothetical protein	-0.262542	7.06962	0.30545	0.924795
ecl8_02178	ecl8_02178	hypothetical protein	-0.262171	4.97735	0.541821	0.982818
ecl8_04205	pilE	Fimbrial protein	-0.261936	6.78321	0.337123	0.948096
ecl8_04028	mepS_3	Murein DD-endopeptidase MepS/Murein LD-carboxypeptidase	-0.261678	7.38682	0.28279	0.914026
ecl8_01380	yycB	putative transporter YycB	-0.261526	7.69795	0.298094	0.920456
ecl8_04730	phnV_2	Putative 2-aminoethylphosphonate transport system permease protein PhnV	-0.261309	8.02149	0.1743	0.827745
ecl8_02482	rbsB_1	Ribose import binding protein RbsB	-0.260228	8.35059	0.165076	0.815526
ecl8_02266	glgC_2	Glucose-1-phosphate adenylyltransferase	-0.26021	6.85833	0.344869	0.9503
ecl8_02917	ecl8_02917	hypothetical protein	-0.259832	6.83454	0.366904	0.956928
ecl8_02419	guaD_2	Guanine deaminase	-0.259687	8.0649	0.188238	0.847898
ecl8_01754	oxyR_2	Hydrogen peroxide-inducible genes activator	-0.259674	7.32844	0.266725	0.902049
ecl8_04094	dkgB	2,5-diketo-D-gluconic acid reductase B	-0.259479	6.90692	0.369263	0.956928
ecl8_00906	pduX	L-threonine kinase	-0.259315	7.01541	0.366573	0.956928
ecl8_01590	ecl8_01590	hypothetical protein	-0.259198	7.15807	0.278274	0.911525
ecl8_01860	manX_1	PTS system mannose-specific EIIAB component	-0.25858	7.26812	0.325838	0.943657
ecl8_01274	bamB	Outer membrane protein assembly factor BamB	-0.258408	5.44292	0.682971	0.993292
ecl8_03865	mscK	Mechanosensitive channel MscK	-0.258396	9.73155	0.186508	0.842874
ecl8_03599	mglA_2	Galactose/methyl galactoside import ATP-binding protein MglA	-0.258291	7.47712	0.247067	0.895174
ecl8_03050	kdgT	2-keto-3-deoxygluconate permease	-0.25829	8.10321	0.167061	0.818357
ecl8_03314	rrrD_1	Lysozyme RrrD	-0.258112	6.59439	0.38421	0.956928
ecl8_03144	ecl8_03144	hypothetical protein	-0.257879	7.306	0.279869	0.914026
ecl8_02387	mrdA_1	Peptidoglycan D,D-transpeptidase MrdA	-0.257775	8.25329	0.219744	0.873838
ecl8_02262	pnbA	Para-nitrobenzyl esterase	-0.257672	7.43339	0.274024	0.906118
ecl8_02936	cho	Excinuclease cho	-0.257363	8.08329	0.250169	0.895174
ecl8_00595	lsrG	(4S)-4-hydroxy-5-phosphonooxypentane-2,3-dione isomerase	-0.257169	5.15044	0.555155	0.982818
ecl8_01861	ecl8_01861	hypothetical protein	-0.257091	7.95743	0.188947	0.8494
ecl8_00941	cbiM	Cobalt transport protein CbiM	-0.25709	5.92793	0.475947	0.981867
ecl8_05136	ecl8_05136	hypothetical protein	-0.257071	6.04852	0.540557	0.982617
ecl8_04077	ecl8_04077	hypothetical protein	-0.256713	7.2534	0.279132	0.913036
ecl8_01638	ddpB	putative D,D-dipeptide transport system permease protein DdpB	-0.256068	6.94896	0.344652	0.950272
ecl8_01697	yeeZ	Protein YeeZ	-0.255895	6.718	0.476181	0.981867
ecl8_02551	ecl8_02551	DNA-binding protein	-0.255688	5.40134	0.514672	0.981867
ecl8_02804	dapL	LL-diaminopimelate aminotransferase	-0.255678	8.03859	0.194181	0.854264
ecl8_00597	ecl8_00597	hypothetical protein	-0.255184	7.86153	0.203762	0.855953
ecl8_01592	yohK_1	Inner membrane protein YohK	-0.25517	7.62969	0.379699	0.956928
ecl8_02446	glnQ_4	Glutamine transport ATP-binding protein GlnQ	-0.255146	7.09261	0.367792	0.956928
ecl8_02537	ecl8_02537	hypothetical protein	-0.254812	7.55291	0.237181	0.887548
ecl8_02746	azoR_2	FMN-dependent NADH-azoreductase	-0.254358	7.56584	0.290899	0.920456
ecl8_01541	yojI	ABC transporter ATP-binding/permease protein YojI	-0.254334	7.26641	0.359416	0.956928
ecl8_02415	dgcM_2	Diguanylate cyclase DgcM	-0.254296	7.65452	0.355791	0.955215
ecl8_00955	ygdR_2	putative lipoprotein YgdR	-0.254248	7.03884	0.380743	0.956928
ecl8_02650	clcB	Voltage-gated ClC-type chloride channel ClcB	-0.253839	7.11583	0.336974	0.948096
ecl8_02067	aroE_3	Quinate/shikimate dehydrogenase (NAD(+))	-0.253539	6.43631	0.414036	0.957506
ecl8_01775	dcyD	D-cysteine desulfhydrase	-0.253261	7.3511	0.381846	0.956928
ecl8_01895	ecl8_01895	hypothetical protein	-0.253182	5.11081	0.563263	0.982818
ecl8_03834	purK	N5-carboxyaminoimidazole ribonucleotide synthase	-0.252798	6.77617	0.34815	0.951497
ecl8_04984	rhaM	L-rhamnose mutarotase	-0.252785	6.64687	0.44445	0.97316
ecl8_03312	ecl8_03312	hypothetical protein	-0.252268	6.30151	0.456266	0.975637
ecl8_01401	ecl8_01401	hypothetical protein	-0.2521	6.59932	0.510319	0.981867
ecl8_02363	yghA	putative oxidoreductase YghA	-0.251785	7.42802	0.347764	0.951497
ecl8_04970	cpxA	Sensor histidine kinase CpxA	-0.251682	8.30074	0.172508	0.826419
ecl8_01706	ecl8_01706	hypothetical protein	-0.251603	6.49095	0.493001	0.981867
ecl8_01128	ygaM	putative protein YgaM	-0.251498	7.46791	0.255306	0.896984
ecl8_04698	phnP	Phosphoribosyl 1,2-cyclic phosphate phosphodiesterase	-0.250886	7.56004	0.243696	0.892325
ecl8_00425	arfA	Alternative ribosome-rescue factor A	-0.250807	8.69803	0.201516	0.855367
ecl8_01057	licC_4	Lichenan permease IIC component	-0.250781	7.60134	0.260849	0.900168
ecl8_01905	livH_2	High-affinity branched-chain amino acid transport system permease protein LivH	-0.250746	7.63816	0.262936	0.900168
ecl8_03660	gsiD_3	Glutathione transport system permease protein GsiD	-0.250707	7.20924	0.378425	0.956928
ecl8_01749	ecl8_01749	hypothetical protein	-0.250685	7.25388	0.325415	0.943027
ecl8_03609	entE	Enterobactin synthase component E	-0.249679	7.55892	0.285763	0.916475
ecl8_01701	fusA_2	Elongation factor G	-0.249606	8.2963	0.34068	0.948096
ecl8_00711	nupG_2	Nucleoside permease NupG	-0.249396	7.7058	0.24897	0.895174
ecl8_01569	uxuA_2	Mannonate dehydratase	-0.249377	8.08181	0.19821	0.855367
ecl8_04602	ulaC_3	Ascorbate-specific PTS system EIIA component	-0.249249	6.3174	0.467772	0.980964
ecl8_02864	norB	Quinolone resistance protein NorB	-0.249082	7.84058	0.226527	0.87954
ecl8_00673	rimO_2	Ribosomal protein S12 methylthiotransferase RimO	-0.248759	8.77637	0.231821	0.884035
ecl8_03920	cyoD	Cytochrome bo(3) ubiquinol oxidase subunit 4	-0.248546	5.70155	0.569186	0.982818
ecl8_01319	pduV_2	Propanediol utilization protein PduV	-0.248488	7.33671	0.347469	0.951497
ecl8_03712	ecl8_03712	hypothetical protein	-0.247343	7.94879	0.288046	0.919948
ecl8_01471	hisP	Histidine transport ATP-binding protein HisP	-0.24699	6.61237	0.418623	0.959094
ecl8_02073	mhpA	3-(3-hydroxy-phenyl)propionate/3-hydroxycinnamic acid hydroxylase	-0.246494	7.57488	0.255226	0.896984
ecl8_04158	pulG	Type II secretion system protein G	-0.246272	6.06611	0.509855	0.981867
ecl8_03704	atsB	Anaerobic sulfatase-maturating enzyme	-0.246058	8.27837	0.214051	0.867398
ecl8_03048	rpiB	Ribose-5-P isomerase B	-0.245466	7.98447	0.261894	0.900168
ecl8_04691	phnH	Alpha-D-ribose 1-methylphosphonate 5-triphosphate synthase subunit PhnH	-0.245233	6.59093	0.39651	0.956928
ecl8_03914	bolA	DNA-binding transcriptional regulator BolA	-0.245148	7.35203	0.300897	0.923093
ecl8_03651	hisQ_2	Histidine transport system permease protein HisQ	-0.245031	8.47484	0.228199	0.880296
ecl8_03206	ssuB_3	Aliphatic sulfonates import ATP-binding protein SsuB	-0.244644	6.29346	0.487758	0.981867
ecl8_01774	fliY_1	L-cystine-binding protein FliY	-0.24447	7.40808	0.332605	0.948096
ecl8_03718	ecl8_03718	hypothetical protein	-0.243775	8.86505	0.228223	0.880296
ecl8_00959	ydjF	putative HTH-type transcriptional regulator YdjF	-0.243228	6.79092	0.380365	0.956928
ecl8_01519	glpB	Anaerobic glycerol-3-phosphate dehydrogenase subunit B	-0.243087	6.70539	0.423601	0.962046
ecl8_01928	ecl8_01928	hypothetical protein	-0.242552	7.79567	0.28742	0.918586
ecl8_01711	ecl8_01711	hypothetical protein	-0.24246	6.27461	0.503986	0.981867
ecl8_01739	mdtJ_1	Spermidine export protein MdtJ	-0.242332	8.08841	0.207887	0.862881
ecl8_02143	bdhA	D-beta-hydroxybutyrate dehydrogenase	-0.242204	6.96606	0.348613	0.951497
ecl8_02987	nimT	2-nitroimidazole transporter	-0.241705	7.41609	0.282096	0.914026
ecl8_02749	paaX	Transcriptional repressor PaaX	-0.241671	6.52182	0.472074	0.9813
ecl8_01719	ecl8_01719	putative signaling protein	-0.241653	9.56067	0.210271	0.865831
ecl8_02621	otnC	3-oxo-tetronate 4-phosphate decarboxylase	-0.241572	5.99079	0.579339	0.982818
ecl8_04538	treR	HTH-type transcriptional regulator TreR	-0.241212	6.77396	0.392175	0.956928
ecl8_01572	setB	Sugar efflux transporter B	-0.241144	7.6738	0.252513	0.895174
ecl8_02902	yciO	putative protein YciO	-0.240512	6.43759	0.437915	0.968722
ecl8_02224	aaeB_3	p-hydroxybenzoic acid efflux pump subunit AaeB	-0.24046	7.88456	0.221087	0.873838
ecl8_03987	ecl8_03987	hypothetical protein	-0.240403	6.82792	0.365076	0.956928
ecl8_02693	iaaH	Indole-3-acetyl-aspartic acid hydrolase	-0.23871	7.19552	0.41586	0.958111
ecl8_02682	ecl8_02682	putative MscS family protein.1	-0.23818	7.63473	0.259148	0.898567
ecl8_03757	ecl8_03757	hypothetical protein	-0.238105	7.50605	0.284409	0.915279
ecl8_00238	bcsZ	Endoglucanase	-0.238026	7.96694	0.27906	0.913036
ecl8_04394	exsA	Exoenzyme S synthesis regulatory protein ExsA	-0.237268	7.23617	0.382134	0.956928
ecl8_02510	fabG_6	3-oxoacyl-[acyl-carrier-protein] reductase FabG	-0.237082	6.14977	0.509346	0.981867
ecl8_00320	glgX	Glycogen debranching enzyme	-0.236535	8.60496	0.201951	0.855367
ecl8_00083	act	Methanol dehydrogenase activator	-0.236462	6.44223	0.483908	0.981867
ecl8_01890	treA	Periplasmic trehalase	-0.236397	7.93211	0.273449	0.906118
ecl8_02828	ecl8_02828	hypothetical protein	-0.235828	6.74314	0.409343	0.957506
ecl8_02601	ecl8_02601	hypothetical protein	-0.23524	7.05248	0.348582	0.951497
ecl8_03448	modB_1	Molybdenum transport system permease protein ModB	-0.234901	5.94763	0.523418	0.981867
ecl8_04948	gldA	Glycerol dehydrogenase	-0.234555	8.30563	0.212728	0.86736
ecl8_00180	xylH_1	Xylose transport system permease protein XylH	-0.2333	7.49901	0.299577	0.922539
ecl8_01707	cobS	Adenosylcobinamide-GDP ribazoletransferase	-0.233272	5.90654	0.612252	0.989023
ecl8_02160	cmpC_2	Bicarbonate transport ATP-binding protein CmpC	-0.232759	6.69967	0.423154	0.961926
ecl8_01048	mntB_1	Manganese transport system membrane protein MntB	-0.232638	6.90162	0.37491	0.956928
ecl8_02018	occR_2	Octopine catabolism/uptake operon regulatory protein OccR	-0.232379	7.55388	0.311469	0.93016
ecl8_02032	menI	1,4-dihydroxy-2-naphthoyl-CoA hydrolase	-0.232293	7.34897	0.37778	0.956928
ecl8_00718	xylH_2	Xylose transport system permease protein XylH	-0.232251	8.00419	0.252588	0.895174
ecl8_01078	bglF_1	PTS system beta-glucoside-specific EIIBCA component	-0.231841	7.7805	0.311452	0.93016
ecl8_00661	cpdA_1	3',5'-cyclic adenosine monophosphate phosphodiesterase CpdA	-0.231736	7.00938	0.389943	0.956928
ecl8_01041	hemS	Hemin transport protein HemS	-0.23169	7.04363	0.429198	0.965603
ecl8_04513	iolC	5-dehydro-2-deoxygluconokinase	-0.231366	8.27048	0.214373	0.867398
ecl8_02429	nimR_4	HTH-type transcriptional regulator NimR	-0.230661	7.98842	0.235874	0.887548
ecl8_02106	ecl8_02106	hypothetical protein	-0.230387	5.87302	0.533887	0.982617
ecl8_04590	cycA_2	D-serine/D-alanine/glycine transporter	-0.230238	8.84729	0.206659	0.860114
ecl8_01082	hoxN	High-affinity nickel transport protein	-0.229978	7.22231	0.37093	0.956928
ecl8_04450	ecl8_04450	hypothetical protein	-0.229942	7.19324	0.454114	0.975637
ecl8_00059	gbpR_1	HTH-type transcriptional regulator GbpR	-0.229801	8.30161	0.222136	0.874659
ecl8_04314	thrA	Bifunctional aspartokinase/homoserine dehydrogenase 1	-0.229242	9.10708	0.21266	0.86736
ecl8_01763	yedJ	putative protein YedJ	-0.2286	7.00442	0.375575	0.956928
ecl8_03240	focA	putative formate transporter 1	-0.228448	9.02299	0.226193	0.87954
ecl8_03272	amiD	N-acetylmuramoyl-L-alanine amidase AmiD	-0.227899	6.27814	0.533302	0.982617
ecl8_00248	fabG_1	3-oxoacyl-[acyl-carrier-protein] reductase FabG	-0.227883	6.14308	0.536182	0.982617
ecl8_01767	yedI	Inner membrane protein YedI	-0.227788	7.56877	0.326216	0.944159
ecl8_01676	algC	Phosphomannomutase/phosphoglucomutase	-0.227769	8.6165	0.346053	0.951283
ecl8_01632	xylB_2	Xylulose kinase	-0.22741	6.77143	0.414971	0.958111
ecl8_00893	ecl8_00893	hypothetical protein	-0.227269	6.49779	0.489803	0.981867
ecl8_01702	sbcB	Exodeoxyribonuclease I	-0.22716	8.18085	0.257073	0.897395
ecl8_02237	ecl8_02237	hypothetical protein	-0.226703	6.23506	0.51968	0.981867
ecl8_01751	acuR	Transcriptional regulator AcuR	-0.226662	7.27457	0.386078	0.956928
ecl8_00827	ecl8_00827	hypothetical protein	-0.226633	6.3469	0.495864	0.981867
ecl8_02452	ecl8_02452	hypothetical protein	-0.225916	7.01376	0.400406	0.957347
ecl8_03457	galM	Aldose 1-epimerase	-0.225885	7.22006	0.372126	0.956928
ecl8_04257	rapA	RNA polymerase-associated protein RapA	-0.225	8.36922	0.250739	0.895174
ecl8_04806	zraP	Zinc resistance-associated protein	-0.22442	7.06467	0.397993	0.956928
ecl8_04545	nrdD	Anaerobic ribonucleoside-triphosphate reductase	-0.224124	8.56037	0.219871	0.873838
ecl8_00348	nudE	ADP compounds hydrolase NudE	-0.223992	7.17414	0.403959	0.957347
ecl8_00696	metC_2	Cystathionine beta-lyase	-0.223959	7.13262	0.404075	0.957347
ecl8_04372	rimI_2	Ribosomal-protein-alanine acetyltransferase	-0.223406	7.29898	0.367832	0.956928
ecl8_02927	katE	Catalase HPII	-0.223199	7.91244	0.252898	0.895174
ecl8_02208	ydhC	Inner membrane transport protein YdhC	-0.223168	7.62592	0.328259	0.94472
ecl8_01003	cysG_2	Siroheme synthase	-0.223135	7.9809	0.281684	0.914026
ecl8_02029	ppsA	Phosphoenolpyruvate synthase	-0.223063	9.09266	0.22063	0.873838
ecl8_01703	dacD	D-alanyl-D-alanine carboxypeptidase DacD	-0.222882	7.52981	0.378864	0.956928
ecl8_00505	mlaD	putative phospholipid ABC transporter-binding protein MlaD	-0.222817	7.22956	0.359256	0.956928
ecl8_02272	ydcO	Inner membrane protein YdcO	-0.222667	6.9221	0.402363	0.957347
ecl8_04391	hpcG	2-oxo-hept-4-ene-1,7-dioate hydratase	-0.222431	7.16714	0.35848	0.956928
ecl8_02271	rob_2	Right origin-binding protein	-0.221853	7.26601	0.350382	0.952776
ecl8_01888	emtA	Endo-type membrane-bound lytic murein transglycosylase A	-0.221834	5.58671	0.587644	0.982818
ecl8_01865	pabB	Aminodeoxychorismate synthase component 1	-0.22181	7.8464	0.270444	0.90456
ecl8_00510	ecl8_00510	hypothetical protein	-0.221745	5.81102	0.573432	0.982818
ecl8_01233	purL	Phosphoribosylformylglycinamidine synthase	-0.221625	9.22972	0.250649	0.895174
ecl8_00791	oppD_1	Oligopeptide transport ATP-binding protein OppD	-0.221581	8.16872	0.246468	0.895174
ecl8_01794	yagG_1	Putative glycoside/cation symporter YagG	-0.221123	7.98139	0.29515	0.920456
ecl8_03650	occP	Octopine permease ATP-binding protein P	-0.220838	7.51709	0.378624	0.956928
ecl8_01357	ecl8_01357	hypothetical protein	-0.220407	5.17416	0.588729	0.982848
ecl8_02450	ecl8_02450	Nitronate monooxygenase	-0.2203	6.04106	0.594896	0.985275
ecl8_03813	ecl8_03813	hypothetical protein	-0.220185	6.31753	0.498162	0.981867
ecl8_03720	scrY_2	Sucrose porin	-0.220142	8.02722	0.261863	0.900168
ecl8_03767	ecl8_03767	hypothetical protein	-0.219866	7.78778	0.296086	0.920456
ecl8_02105	mdtM_1	Multidrug resistance protein MdtM	-0.21957	8.17868	0.270127	0.904347
ecl8_02671	fabD_1	Malonyl CoA-acyl carrier protein transacylase	-0.219387	6.98694	0.417286	0.958111
ecl8_05085	ecl8_05085	hypothetical protein	-0.21926	6.25479	0.538801	0.982617
ecl8_02302	yncE_1	putative protein YncE	-0.219238	7.50526	0.339552	0.948096
ecl8_03790	ecl8_03790	hypothetical protein	-0.219182	6.13954	0.655444	0.993292
ecl8_02523	iolT	Major myo-inositol transporter IolT	-0.218898	9.16704	0.29028	0.920456
ecl8_01662	ecl8_01662	hypothetical protein	-0.21889	8.33833	0.306814	0.925214
ecl8_03195	pqiB	Paraquat-inducible protein B	-0.218808	7.70659	0.292594	0.920456
ecl8_03558	ybdO_1	putative HTH-type transcriptional regulator YbdO	-0.21858	7.31195	0.419173	0.959094
ecl8_03835	selU	tRNA 2-selenouridine synthase	-0.218425	7.2445	0.416102	0.958111
ecl8_03760	ecl8_03760	hypothetical protein	-0.218236	8.30608	0.244481	0.893515
ecl8_03047	talB_1	Transaldolase B	-0.217765	6.90576	0.472399	0.9813
ecl8_00365	codA_1	Cytosine deaminase	-0.217432	8.59156	0.347738	0.951497
ecl8_01596	bglG	Cryptic beta-glucoside bgl operon antiterminator	-0.21713	6.84172	0.473734	0.9813
ecl8_03716	yibH_1	Inner membrane protein YibH	-0.216718	7.46816	0.328167	0.94472
ecl8_03891	ecl8_03891	hypothetical protein	-0.216708	7.48569	0.392744	0.956928
ecl8_01085	norR	Anaerobic nitric oxide reductase transcription regulator NorR	-0.215871	7.92312	0.272159	0.906051
ecl8_01181	ypjD	Inner membrane protein YpjD	-0.215694	7.90395	0.272331	0.906051
ecl8_04010	livF_5	High-affinity branched-chain amino acid transport ATP-binding protein LivF	-0.214947	6.4336	0.480613	0.981867
ecl8_03739	ecl8_03739	hypothetical protein	-0.214671	7.19501	0.36954	0.956928
ecl8_03906	fadM	Long-chain acyl-CoA thioesterase FadM	-0.214577	6.17105	0.535026	0.982617
ecl8_02407	ribX_2	Riboflavin transport system permease protein RibX	-0.21431	7.34042	0.390388	0.956928
ecl8_04044	ribN	Riboflavin transporter	-0.214124	7.59991	0.391417	0.956928
ecl8_01460	dedA	Protein DedA	-0.214095	7.07968	0.495001	0.981867
ecl8_03664	ecl8_03664	hypothetical protein	-0.213665	7.07729	0.50085	0.981867
ecl8_02530	ecl8_02530	hypothetical protein	-0.213599	6.9845	0.491813	0.981867
ecl8_01502	ecl8_01502	hypothetical protein	-0.213366	5.30119	0.704515	0.993292
ecl8_02372	ygiW_2	Protein YgiW	-0.213312	7.75459	0.411408	0.957506
ecl8_01843	ecl8_01843	hypothetical protein	-0.213298	8.78499	0.299724	0.922539
ecl8_01107	osmY_2	Osmotically-inducible protein Y	-0.213252	6.33042	0.532833	0.982617
ecl8_03011	yciE_2	Protein YciE	-0.21323	7.23847	0.382905	0.956928
ecl8_03659	oppF_5	Oligopeptide transport ATP-binding protein OppF	-0.212597	7.65946	0.310284	0.929033
ecl8_00047	phnS	Putative 2-aminoethylphosphonate-binding periplasmic protein	-0.212217	7.87929	0.333024	0.948096
ecl8_02164	codAch2	Pterin deaminase	-0.21209	7.06864	0.406949	0.957506
ecl8_02536	mrkD_2	Fimbria adhesin protein	-0.211937	7.41159	0.376912	0.956928
ecl8_03296	ecl8_03296	hypothetical protein	-0.211933	7.68902	0.311766	0.93025
ecl8_01796	araF	L-arabinose-binding periplasmic protein	-0.211671	7.59761	0.402491	0.957347
ecl8_05071	ecl8_05071	hypothetical protein	-0.211589	5.93431	0.579557	0.982818
ecl8_02476	argE_1	Acetylornithine deacetylase	-0.211359	7.12158	0.434602	0.968211
ecl8_01475	yfcG_1	Disulfide-bond oxidoreductase YfcG	-0.210826	6.41983	0.576548	0.982818
ecl8_04116	ldcC	Constitutive lysine decarboxylase	-0.210775	8.53555	0.255155	0.896984
ecl8_03034	phoQ	Sensor protein PhoQ	-0.210572	7.96073	0.302594	0.923093
ecl8_02186	cat3	Chloramphenicol acetyltransferase 3	-0.210213	6.15017	0.546726	0.982818
ecl8_00062	galD	4-oxalomesaconate tautomerase	-0.209784	7.5525	0.403517	0.957347
ecl8_01732	aaeA_2	p-hydroxybenzoic acid efflux pump subunit AaeA	-0.209757	9.11689	0.257601	0.897395
ecl8_02656	ypwA	Carboxypeptidase 1	-0.20935	7.93315	0.363718	0.956928
ecl8_02489	pgtC	Phosphoglycerate transport regulatory protein PgtC	-0.209306	8.76867	0.321273	0.936334
ecl8_02249	ecl8_02249	Aminodeoxyfutalosine deaminase	-0.209242	7.32713	0.376011	0.956928
ecl8_00820	pgrR_1	HTH-type transcriptional regulator PgrR	-0.209141	8.99693	0.264457	0.902049
ecl8_02275	ecl8_02275	hypothetical protein	-0.208985	6.05618	0.575375	0.982818
ecl8_03648	tpa	Taurine--pyruvate aminotransferase	-0.208921	8.00646	0.328883	0.944743
ecl8_02642	ecl8_02642	hypothetical protein	-0.20806	5.68243	0.602097	0.986479
ecl8_04165	outN	Type II secretion system protein N	-0.20796	7.20562	0.411185	0.957506
ecl8_03837	ecl8_03837	hypothetical protein	-0.207888	8.66186	0.261477	0.900168
ecl8_02070	ecl8_02070	putative ABC transporter permease protein	-0.207716	6.84945	0.470899	0.9813
ecl8_02147	scoB	putative succinyl-CoA:3-ketoacid coenzyme A transferase subunit B	-0.207548	5.14374	0.622947	0.991327
ecl8_02109	fdhF_1	Formate dehydrogenase H	-0.20732	8.1027	0.325357	0.943027
ecl8_04410	fldC	(R)-phenyllactyl-CoA dehydratase beta subunit	-0.207311	7.53349	0.377334	0.956928
ecl8_02792	zntB_2	Zinc transport protein ZntB	-0.207236	7.53252	0.364986	0.956928
ecl8_03111	mdoC	Glucans biosynthesis protein C	-0.207192	7.86675	0.316845	0.93378
ecl8_04535	pyrI	Aspartate carbamoyltransferase regulatory chain	-0.207156	6.66479	0.495548	0.981867
ecl8_03601	bdcA_2	Cyclic-di-GMP-binding biofilm dispersal mediator protein	-0.207155	7.31241	0.411038	0.957506
ecl8_04418	fosA	Glutathione transferase FosA	-0.207143	5.67822	0.627771	0.993292
ecl8_01136	azoR_1	FMN-dependent NADH-azoreductase	-0.20701	7.14045	0.413289	0.957506
ecl8_01054	chbA_2	PTS system N,N'-diacetylchitobiose-specific EIIA component	-0.206967	5.79636	0.609106	0.98899
ecl8_01742	intA_5	Prophage integrase IntA	-0.206736	8.72724	0.29374	0.920456
ecl8_02074	mhpB	2,3-dihydroxyphenylpropionate/2, 3-dihydroxicinnamic acid 1,2-dioxygenase	-0.206681	6.35443	0.555514	0.982818
ecl8_02586	ecl8_02586	hypothetical protein	-0.206509	7.29649	0.383649	0.956928
ecl8_04874	ecl8_04874	hypothetical protein	-0.206418	7.66483	0.393676	0.956928
ecl8_03929	pcaK_3	4-hydroxybenzoate transporter PcaK	-0.206328	7.72503	0.368519	0.956928
ecl8_03194	ecl8_03194	hypothetical protein	-0.206171	7.0886	0.484898	0.981867
ecl8_00164	lldD_1	L-lactate dehydrogenase	-0.206107	7.87417	0.328676	0.944743
ecl8_04575	tamA	Translocation and assembly module subunit TamA	-0.20608	8.37963	0.269175	0.902945
ecl8_04375	hexR_2	HTH-type transcriptional regulator HexR	-0.205974	7.3821	0.376935	0.956928
ecl8_03542	shlB	Hemolysin transporter protein ShlB	-0.205959	9.97107	0.311904	0.93025
ecl8_03523	nagD	Ribonucleotide monophosphatase NagD	-0.205958	7.4387	0.363851	0.956928
ecl8_03430	ybhC	Putative acyl-CoA thioester hydrolase YbhC	-0.205755	8.07622	0.306504	0.925214
ecl8_04426	trpS2	Tryptophan--tRNA ligase 2	-0.205586	7.5698	0.369077	0.956928
ecl8_03075	ycfH	putative metal-dependent hydrolase YcfH	-0.205438	6.92769	0.439751	0.970524
ecl8_00171	mtlA	PTS system mannitol-specific EIICBA component	-0.205233	8.61522	0.294801	0.920456
ecl8_05176	cusB_2	Cation efflux system protein CusB	-0.204484	8.10598	0.306305	0.925214
ecl8_03587	codB	Cytosine permease	-0.204366	8.0834	0.298801	0.921653
ecl8_00808	evgA_4	DNA-binding transcriptional activator EvgA	-0.203799	7.34682	0.413125	0.957506
ecl8_04813	rsd	Regulator of sigma D	-0.203334	7.72865	0.376332	0.956928
ecl8_00758	ygfF	putative oxidoreductase YgfF	-0.203319	6.75544	0.475393	0.981867
ecl8_03632	gcvA_5	Glycine cleavage system transcriptional activator	-0.202947	7.88211	0.395318	0.956928
ecl8_01120	proW	Glycine betaine/proline betaine transport system permease protein ProW	-0.202883	7.49973	0.386858	0.956928
ecl8_04549	pgl_2	6-phosphogluconolactonase	-0.202764	7.68206	0.392636	0.956928
ecl8_02608	ecl8_02608	hypothetical protein	-0.202742	6.01908	0.635106	0.993292
ecl8_03104	ecl8_03104	hypothetical protein	-0.202701	7.14276	0.417665	0.958503
ecl8_02509	carA_1	Caffeate CoA-transferase	-0.202592	7.68704	0.377648	0.956928
ecl8_03294	ybjM	Inner membrane protein YbjM	-0.202477	7.82838	0.335486	0.948096
ecl8_02602	livH_4	High-affinity branched-chain amino acid transport system permease protein LivH	-0.202455	7.31223	0.416869	0.958111
ecl8_03670	soxS_2	Regulatory protein SoxS	-0.202288	6.70813	0.538993	0.982617
ecl8_02096	yfiZ	putative siderophore transport system permease protein YfiZ	-0.202123	6.34839	0.601629	0.986062
ecl8_00430	def_1	Peptide deformylase	-0.201825	7.94842	0.319069	0.93609
ecl8_03678	manZ_2	PTS system mannose-specific EIID component	-0.201448	7.69888	0.374219	0.956928
ecl8_01862	pdeD	putative cyclic di-GMP phosphodiesterase PdeD	-0.201073	7.49598	0.366188	0.956928
ecl8_00924	pduC	Propanediol dehydratase large subunit	-0.200626	8.22768	0.29957	0.922539
ecl8_01699	plaP	Low-affinity putrescine importer PlaP	-0.20045	7.57055	0.53683	0.982617
ecl8_00223	oppF_1	Oligopeptide transport ATP-binding protein OppF	-0.200214	8.13307	0.406619	0.957506
ecl8_04700	ecl8_04700	Blue-light-activated protein	-0.200089	8.71404	0.283765	0.914026
ecl8_01240	yphA_1	Inner membrane protein YphA	-0.200077	5.63823	0.607891	0.988399
ecl8_02938	astE_2	Succinylglutamate desuccinylase	-0.199675	8.04555	0.306996	0.925214
ecl8_01195	pheA	P-protein	-0.19963	7.96574	0.341762	0.948096
ecl8_01868	dinG_1	putative ATP-dependent helicase DinG	-0.199586	7.87956	0.319884	0.936334
ecl8_03729	iolG_1	Myo-inositol 2-dehydrogenase	-0.199087	6.71458	0.521984	0.981867
ecl8_02460	oxlT	Oxalate:formate antiporter	-0.198761	7.37124	0.489536	0.981867
ecl8_00266	nikE	Nickel import ATP-binding protein NikE	-0.198451	7.34296	0.480452	0.981867
ecl8_04199	aroP_2	Aromatic amino acid transport protein AroP	-0.198199	8.09425	0.410158	0.957506
ecl8_00829	mdtO	Multidrug resistance protein MdtO	-0.198038	8.56949	0.393632	0.956928
ecl8_00370	pabA	Aminodeoxychorismate synthase component 2	-0.198025	7.15979	0.526751	0.982617
ecl8_04817	thiS	Sulfur carrier protein ThiS	-0.197712	4.74313	0.652796	0.993292
ecl8_01430	ecl8_01430	hypothetical protein	-0.197576	7.16474	0.473423	0.9813
ecl8_05008	ecl8_05008	Acetyltransferase	-0.197516	8.60785	0.316945	0.93378
ecl8_04162	gspK	Putative type II secretion system protein K	-0.197108	7.50475	0.39792	0.956928
ecl8_04946	rhaS_1	HTH-type transcriptional activator RhaS	-0.197069	8.12854	0.366809	0.956928
ecl8_03402	ecl8_03402	hypothetical protein	-0.196843	6.33108	0.560836	0.982818
ecl8_01575	fruA_1	PTS system fructose-specific EIIB'BC component	-0.196833	7.95866	0.348433	0.951497
ecl8_01909	yjiE	HTH-type transcriptional regulator YjiE	-0.196627	9.09185	0.281992	0.914026
ecl8_04686	proP_3	Proline/betaine transporter	-0.19629	9.55068	0.28573	0.916475
ecl8_03209	hipO_3	Hippurate hydrolase	-0.196099	7.56696	0.38341	0.956928
ecl8_04287	citB_2	Transcriptional regulatory protein CitB	-0.195627	7.7169	0.340816	0.948096
ecl8_00306	lacG_1	Lactose transport system permease protein LacG	-0.19556	6.90788	0.558256	0.982818
ecl8_05266	ecl8_05266	hypothetical protein	-0.195361	5.56484	0.65125	0.993292
ecl8_03152	puuP	Putrescine importer PuuP	-0.195301	7.45119	0.394537	0.956928
ecl8_03442	ycgZ	putative two-component-system connector protein YcgZ	-0.194848	5.2142	0.654991	0.993292
ecl8_01132	ecl8_01132	hypothetical protein	-0.194436	7.03062	0.465727	0.980714
ecl8_00846	ecl8_00846	hypothetical protein	-0.194259	7.29273	0.445578	0.97316
ecl8_01621	oxyR_1	Hydrogen peroxide-inducible genes activator	-0.194255	7.48981	0.423339	0.961926
ecl8_03593	agp_2	Glucose-1-phosphatase	-0.194174	7.69022	0.368206	0.956928
ecl8_03969	brnQ	Branched-chain amino acid transport system 2 carrier protein	-0.194104	8.5065	0.363393	0.956928
ecl8_01449	mepA	Penicillin-insensitive murein endopeptidase	-0.193942	6.90639	0.514714	0.981867
ecl8_01627	araB_1	Ribulokinase	-0.19393	7.2591	0.413994	0.957506
ecl8_03242	pflA	Pyruvate formate-lyase 1-activating enzyme	-0.193703	6.67148	0.504292	0.981867
ecl8_04171	gluQ	Glutamyl-Q tRNA(Asp) synthetase	-0.193692	7.85459	0.376522	0.956928
ecl8_02701	pntB	NAD(P) transhydrogenase subunit beta	-0.19348	7.4159	0.429787	0.965603
ecl8_03004	pdeH_2	Cyclic di-GMP phosphodiesterase PdeH	-0.193452	8.31543	0.294545	0.920456
ecl8_03934	yajL	Protein/nucleic acid deglycase 3	-0.193133	6.92495	0.52841	0.982617
ecl8_02947	ynjB	Protein YnjB	-0.192684	7.58022	0.376032	0.956928
ecl8_01966	narG	Respiratory nitrate reductase 1 alpha chain	-0.192629	8.83216	0.313665	0.930752
ecl8_02161	ecl8_02161	hypothetical protein	-0.192516	7.01749	0.447976	0.97316
ecl8_04912	ydfK_2	putative membrane protein YdfK	-0.192296	9.63668	0.327932	0.94472
ecl8_03584	yoaD	Putative 2-hydroxyacid dehydrogenase YoaD	-0.191807	7.12734	0.496078	0.981867
ecl8_02340	fdnG_2	Formate dehydrogenase, nitrate-inducible, major subunit	-0.191444	8.50988	0.341015	0.948096
ecl8_02159	ribX_1	Riboflavin transport system permease protein RibX	-0.191417	6.5134	0.5331	0.982617
ecl8_04331	lplA	Lipoate-protein ligase A	-0.19134	7.74994	0.368151	0.956928
ecl8_04552	ecl8_04552	Deacetylase	-0.19113	7.51638	0.413561	0.957506
ecl8_02478	opd	Parathion hydrolase	-0.191099	6.89297	0.517059	0.981867
ecl8_03196	pqiA	Paraquat-inducible protein A	-0.191083	7.58124	0.404934	0.957506
ecl8_00676	dkgA	2,5-diketo-D-gluconic acid reductase A	-0.19074	7.26387	0.447001	0.97316
ecl8_01096	mntA	Manganese-binding lipoprotein MntA	-0.190031	7.93894	0.392336	0.956928
ecl8_04468	ecl8_04468	hypothetical protein	-0.189774	6.17269	0.620315	0.991325
ecl8_01835	yebZ	Inner membrane protein YebZ	-0.189586	7.26224	0.424567	0.962339
ecl8_01795	ftnA_2	Bacterial non-heme ferritin	-0.189552	6.79397	0.504178	0.981867
ecl8_04207	epsF_2	Type II secretion system protein F	-0.189272	7.25258	0.456935	0.97608
ecl8_00054	celA_1	PTS system cellobiose-specific EIIB component	-0.189221	6.44483	0.601333	0.985929
ecl8_03986	tetA	Tetracycline resistance protein, class B	-0.188669	9.21703	0.353939	0.953698
ecl8_01133	ecl8_01133	hypothetical protein	-0.188562	8.89623	0.337187	0.948096
ecl8_03304	ecl8_03304	hypothetical protein	-0.188543	7.79508	0.359649	0.956928
ecl8_03801	ecl8_03801	hypothetical protein	-0.188401	6.19092	0.623529	0.991363
ecl8_03217	gloC	Hydroxyacylglutathione hydrolase GloC	-0.18815	6.97712	0.547735	0.982818
ecl8_02205	mdtK	Multidrug resistance protein MdtK	-0.18807	7.5653	0.439636	0.970524
ecl8_01722	gcvA_2	Glycine cleavage system transcriptional activator	-0.18801	7.31855	0.489249	0.981867
ecl8_03976	ppnP	Pyrimidine/purine nucleoside phosphorylase	-0.187906	6.62628	0.522324	0.981867
ecl8_05133	ecl8_05133	hypothetical protein	-0.187654	7.45152	0.401479	0.957347
ecl8_03091	dmlR_14	HTH-type transcriptional regulator DmlR	-0.187491	7.28144	0.462153	0.977363
ecl8_00936	cbiG	Cobalt-precorrin-5A hydrolase	-0.187387	6.85171	0.518904	0.981867
ecl8_01546	ecl8_01546	Putative transport protein	-0.187258	7.55033	0.389996	0.956928
ecl8_04763	ecl8_04763	hypothetical protein	-0.187113	7.53932	0.425515	0.96259
ecl8_00914	yvqK_2	Cob(I)yrinic acid a,c-diamide adenosyltransferase	-0.187047	7.3369	0.45068	0.974673
ecl8_02816	bdcA_1	Cyclic-di-GMP-binding biofilm dispersal mediator protein	-0.186953	5.88108	0.638629	0.993292
ecl8_01022	bsdD	Phenolic acid decarboxylase subunit D	-0.186951	6.99504	0.507574	0.981867
ecl8_03820	ecl8_03820	hypothetical protein	-0.186707	6.2233	0.606215	0.988117
ecl8_01832	exoX	Exodeoxyribonuclease 10	-0.186337	6.90372	0.485792	0.981867
ecl8_03391	dxs_1	1-deoxy-D-xylulose-5-phosphate synthase	-0.186259	7.32412	0.45616	0.975637
ecl8_00273	arnB	UDP-4-amino-4-deoxy-L-arabinose--oxoglutarate aminotransferase	-0.186176	9.03462	0.312543	0.930752
ecl8_01467	argT	Lysine/arginine/ornithine-binding periplasmic protein	-0.18613	6.94866	0.511816	0.981867
ecl8_01366	ecl8_01366	hypothetical protein	-0.185197	5.74596	0.617311	0.991325
ecl8_03427	yvoA	HTH-type transcriptional repressor YvoA	-0.1851	6.21218	0.590906	0.982848
ecl8_04941	argB	Acetylglutamate kinase	-0.183982	7.6866	0.380365	0.956928
ecl8_03864	rpnA_3	Recombination-promoting nuclease RpnA	-0.183841	7.62172	0.431096	0.96667
ecl8_01591	cdd	Cytidine deaminase	-0.183828	7.1099	0.48268	0.981867
ecl8_04442	cusB_1	Cation efflux system protein CusB	-0.183343	7.99393	0.365443	0.956928
ecl8_02757	paaD	Putative 1,2-phenylacetyl-CoA epoxidase, subunit D	-0.183204	6.4362	0.639813	0.993292
ecl8_00031	ecl8_00031	hypothetical protein	-0.182907	6.99605	0.500018	0.981867
ecl8_04068	dinB	DNA polymerase IV	-0.182028	7.73712	0.451265	0.974673
ecl8_00490	elbB	Glyoxalase ElbB	-0.181738	7.02676	0.523526	0.981867
ecl8_03134	ecl8_03134	hypothetical protein	-0.181529	5.40017	0.689043	0.993292
ecl8_01647	mdtC	Multidrug resistance protein MdtC	-0.181237	8.62331	0.389741	0.956928
ecl8_03555	dacA	D-alanyl-D-alanine carboxypeptidase DacA	-0.181063	6.75902	0.584165	0.982818
ecl8_01992	yceI	Protein YceI	-0.180997	6.1167	0.617724	0.991325
ecl8_01854	ftsI_1	Peptidoglycan D,D-transpeptidase FtsI	-0.180896	7.84573	0.380984	0.956928
ecl8_00636	ureG_1	Urease accessory protein UreG	-0.180892	6.84095	0.50738	0.981867
ecl8_02728	ydcF	Protein YdcF	-0.180366	6.10486	0.602499	0.986657
ecl8_03018	cmtR	HTH-type transcriptional regulator CmtR	-0.180289	6.6197	0.540198	0.982617
ecl8_04688	ecl8_04688	hypothetical protein	-0.180031	7.55834	0.422431	0.961926
ecl8_04332	deoD	Purine nucleoside phosphorylase DeoD-type	-0.180027	6.99693	0.505173	0.981867
ecl8_03271	auaH_2	Aurachin B dehydrogenase	-0.179985	7.60548	0.398215	0.956928
ecl8_04585	hxlR	HTH-type transcriptional activator HxlR	-0.179979	6.00407	0.632201	0.993292
ecl8_02094	fhuA_2	Ferrichrome outer membrane transporter/phage receptor	-0.179905	8.56414	0.346267	0.951302
ecl8_02845	ytbE	putative oxidoreductase YtbE	-0.179692	7.07242	0.533774	0.982617
ecl8_03838	ecl8_03838	putative ABC transporter ATP-binding protein	-0.179675	6.26611	0.623326	0.991363
ecl8_02465	ulaA_1	Ascorbate-specific PTS system EIIC component	-0.179603	8.27617	0.467866	0.980964
ecl8_01522	glpQ	Glycerophosphodiester phosphodiesterase, periplasmic	-0.179498	7.7217	0.460316	0.977363
ecl8_02323	narW	putative nitrate reductase molybdenum cofactor assembly chaperone NarW	-0.179255	6.67921	0.556869	0.982818
ecl8_02274	ydcP_2	putative protease YdcP	-0.179124	8.01509	0.391061	0.956928
ecl8_03681	dgaR_1	Transcriptional regulatory protein DagR	-0.179122	10.5081	0.401969	0.957347
ecl8_03585	lyx	L-xylulose/3-keto-L-gulonate kinase	-0.179041	7.31056	0.4693	0.98105
ecl8_02229	slyB	Outer membrane lipoprotein SlyB	-0.178546	7.90247	0.410156	0.957506
ecl8_02797	aroP_1	Aromatic amino acid transport protein AroP	-0.178463	8.44037	0.334777	0.948096
ecl8_00943	cbiQ	Cobalt transport protein CbiQ	-0.178236	7.43611	0.500006	0.981867
ecl8_01409	ecl8_01409	hypothetical protein	-0.177786	6.77882	0.595595	0.985275
ecl8_04483	ecl8_04483	hypothetical protein	-0.177783	5.88839	0.62646	0.993292
ecl8_02286	prr	Gamma-aminobutyraldehyde dehydrogenase	-0.177525	8.10918	0.344302	0.950008
ecl8_03264	lysO	Lysine exporter LysO	-0.177025	9.72423	0.336756	0.948096
ecl8_01613	ecl8_01613	hypothetical protein	-0.176975	5.67435	0.653289	0.993292
ecl8_00443	ecl8_00443	hypothetical protein	-0.176889	6.02591	0.639078	0.993292
ecl8_03117	ghrA_2	Glyoxylate/hydroxypyruvate reductase A	-0.176806	7.09283	0.486284	0.981867
ecl8_01727	ecl8_01727	hypothetical protein	-0.176591	7.99925	0.402037	0.957347
ecl8_02841	fabG_9	3-oxoacyl-[acyl-carrier-protein] reductase FabG	-0.176506	7.70746	0.462672	0.977413
ecl8_02524	fruB_2	Multiphosphoryl transfer protein	-0.176497	7.73348	0.432898	0.967395
ecl8_04551	dgaE	D-glucosaminate-6-phosphate ammonia lyase	-0.17626	7.65502	0.42394	0.962339
ecl8_03320	ecl8_03320	hypothetical protein	-0.176191	7.26886	0.462261	0.977363
ecl8_04200	yicJ_2	Inner membrane symporter YicJ	-0.176027	8.2784	0.366969	0.956928
ecl8_02516	cdaR_1	Carbohydrate diacid regulator	-0.175969	7.66651	0.503418	0.981867
ecl8_04415	slyA_3	Transcriptional regulator SlyA	-0.175956	6.70309	0.577638	0.982818
ecl8_00684	ecl8_00684	hypothetical protein	-0.175906	6.5176	0.553324	0.982818
ecl8_02921	ecl8_02921	hypothetical protein	-0.175617	6.40596	0.574928	0.982818
ecl8_02610	lacI_1	Lactose operon repressor	-0.175576	6.79121	0.523375	0.981867
ecl8_01813	nudB	Dihydroneopterin triphosphate diphosphatase	-0.175272	5.21781	0.680552	0.993292
ecl8_00618	pduD_1	Propanediol dehydratase medium subunit	-0.175178	6.6576	0.570054	0.982818
ecl8_04710	ecl8_04710	hypothetical protein	-0.17509	7.23223	0.497668	0.981867
ecl8_04666	ecl8_04666	hypothetical protein	-0.174996	7.71144	0.423179	0.961926
ecl8_01484	sdcS	Sodium-dependent dicarboxylate transporter SdcS	-0.174953	7.91065	0.43234	0.967063
ecl8_02675	ecl8_02675	hypothetical protein	-0.174941	5.60392	0.648935	0.993292
ecl8_00455	msrQ	Protein-methionine-sulfoxide reductase heme-binding subunit MsrQ	-0.174565	7.0115	0.505489	0.981867
ecl8_02007	ecl8_02007	hypothetical protein	-0.174527	8.95641	0.373936	0.956928
ecl8_00890	ptsP	Phosphoenolpyruvate-dependent phosphotransferase system	-0.17427	9.00007	0.35352	0.953698
ecl8_00231	ecl8_00231	hypothetical protein	-0.174073	8.56936	0.376475	0.956928
ecl8_02381	chbA_3	PTS system N,N'-diacetylchitobiose-specific EIIA component	-0.173839	6.24261	0.649235	0.993292
ecl8_02321	nhoA	N-hydroxyarylamine O-acetyltransferase	-0.173559	5.50787	0.707686	0.993292
ecl8_02087	gltC_2	HTH-type transcriptional regulator GltC	-0.173469	6.81961	0.528729	0.982617
ecl8_00495	hpf_1	Ribosome hibernation promoting factor	-0.173396	6.18973	0.691944	0.993292
ecl8_03710	hipO_4	Hippurate hydrolase	-0.173327	9.03731	0.420649	0.961513
ecl8_01539	ada_2	Bifunctional transcriptional activator/DNA repair enzyme Ada	-0.173177	6.1235	0.629853	0.993292
ecl8_02820	ecl8_02820	hypothetical protein	-0.173107	8.15752	0.373594	0.956928
ecl8_02687	pcaF	Beta-ketoadipyl-CoA thiolase	-0.173066	6.93415	0.519561	0.981867
ecl8_00309	yhhA	putative protein YhhA	-0.172821	5.91441	0.645326	0.993292
ecl8_02473	cysL_2	HTH-type transcriptional regulator CysL	-0.172747	6.54778	0.568648	0.982818
ecl8_00861	kdgM	Oligogalacturonate-specific porin KdgM	-0.172723	8.38891	0.400946	0.957347
ecl8_01373	gpr	L-glyceraldehyde 3-phosphate reductase	-0.172384	7.64371	0.47961	0.981867
ecl8_04111	yaeQ	putative protein YaeQ	-0.172316	7.35315	0.502037	0.981867
ecl8_03592	glpT_2	Glycerol-3-phosphate transporter	-0.172268	8.10868	0.37962	0.956928
ecl8_01889	fhuA_1	Ferrichrome outer membrane transporter/phage receptor	-0.171739	8.29037	0.344349	0.950008
ecl8_00379	ywrO_1	General stress protein 14	-0.171733	7.74146	0.402977	0.957347
ecl8_01294	uraA	Uracil permease	-0.171292	7.8345	0.416466	0.958111
ecl8_04465	ecl8_04465	hypothetical protein	-0.171004	8.93066	0.348539	0.951497
ecl8_00078	ecl8_00078	hypothetical protein	-0.171002	6.49414	0.568514	0.982818
ecl8_01560	yejF_2	putative ABC transporter ATP-binding protein YejF	-0.169864	7.53864	0.451513	0.974673
ecl8_04582	ytfJ	putative protein YtfJ	-0.169583	7.38373	0.49277	0.981867
ecl8_02785	nifJ_2	Pyruvate-flavodoxin oxidoreductase	-0.16957	7.38768	0.46561	0.980714
ecl8_00127	pyrE_1	Orotate phosphoribosyltransferase	-0.169546	6.90695	0.522705	0.981867
ecl8_01660	ecl8_01660	hypothetical protein	-0.16907	8.15197	0.385139	0.956928
ecl8_02488	pgtP	Phosphoglycerate transporter protein	-0.168942	9.51728	0.372891	0.956928
ecl8_00619	pduE_1	Propanediol dehydratase small subunit	-0.168835	6.37221	0.59172	0.983136
ecl8_01953	ychN	Protein YchN	-0.168644	6.01331	0.664333	0.993292
ecl8_04663	dcuA	Anaerobic C4-dicarboxylate transporter DcuA	-0.168606	8.57844	0.407812	0.957506
ecl8_04803	purD	Phosphoribosylamine--glycine ligase	-0.168594	8.37448	0.429425	0.965603
ecl8_03694	feaB_2	Phenylacetaldehyde dehydrogenase	-0.168518	7.98541	0.492563	0.981867
ecl8_04748	tyrB_2	Tyrosine aminotransferase	-0.168475	7.58549	0.448174	0.97316
ecl8_02735	astC_1	Succinylornithine transaminase	-0.168421	7.20399	0.516326	0.981867
ecl8_02786	nifJ_3	Pyruvate-flavodoxin oxidoreductase	-0.167858	7.10884	0.513845	0.981867
ecl8_03115	ycdY	Chaperone protein YcdY	-0.167595	6.37373	0.621181	0.991327
ecl8_04335	deoC	Deoxyribose-phosphate aldolase	-0.167459	7.55067	0.468832	0.980964
ecl8_02754	paaG	1,2-epoxyphenylacetyl-CoA isomerase	-0.16725	6.99082	0.556844	0.982818
ecl8_03575	ybdL	Methionine aminotransferase	-0.167062	7.14257	0.523265	0.981867
ecl8_04943	argE_3	Acetylornithine deacetylase	-0.166985	8.26058	0.390352	0.956928
ecl8_01904	livJ_2	Leu/Ile/Val/Thr-binding protein	-0.166704	7.61431	0.496149	0.981867
ecl8_01013	pcm	Protein-L-isoaspartate O-methyltransferase	-0.166595	5.50847	0.710407	0.993292
ecl8_01585	ecl8_01585	hypothetical protein	-0.16639	7.96684	0.395182	0.956928
ecl8_04405	rhaR_1	HTH-type transcriptional activator RhaR	-0.16605	7.44603	0.466681	0.980964
ecl8_01059	ecl8_01059	hypothetical protein	-0.166029	8.37843	0.38915	0.956928
ecl8_03721	sacX	Negative regulator of SacY activity	-0.165717	7.69041	0.454757	0.975637
ecl8_01713	dmlR_8	HTH-type transcriptional regulator DmlR	-0.16565	6.86182	0.575309	0.982818
ecl8_01899	tsaR_2	HTH-type transcriptional regulator TsaR	-0.165499	8.8527	0.380326	0.956928
ecl8_04005	eutC_2	Ethanolamine ammonia-lyase light chain	-0.16513	8.84665	0.413364	0.957506
ecl8_04321	rob_4	Right origin-binding protein	-0.164845	8.22667	0.452236	0.975531
ecl8_04784	sorB_3	PTS system sorbose-specific EIIB component	-0.164621	8.93201	0.404255	0.957347
ecl8_01643	ydcP_1	putative protease YdcP	-0.164542	8.01246	0.453008	0.975637
ecl8_04625	nnr	Bifunctional NAD(P)H-hydrate repair enzyme Nnr	-0.164474	8.10584	0.42964	0.965603
ecl8_04312	thrC	Threonine synthase	-0.164341	8.67608	0.398205	0.956928
ecl8_01599	oprM_2	Outer membrane protein OprM	-0.164249	7.89742	0.406106	0.957506
ecl8_02118	ccmA	Cytochrome c biogenesis ATP-binding export protein CcmA	-0.164177	5.11628	0.698873	0.993292
ecl8_01387	ecl8_01387	hypothetical protein	-0.164153	6.71196	0.559873	0.982818
ecl8_03949	birA_1	Bifunctional ligase/repressor BirA	-0.163849	6.57554	0.58706	0.982818
ecl8_01536	rcsD	Phosphotransferase RcsD	-0.163691	9.12295	0.433955	0.967795
ecl8_03719	scrK	Fructokinase	-0.163628	6.83005	0.537611	0.982617
ecl8_03811	ecl8_03811	hypothetical protein	-0.163574	6.72036	0.562397	0.982818
ecl8_01646	mdtD	Putative multidrug resistance protein MdtD	-0.163565	7.92069	0.466259	0.980937
ecl8_00912	adhE_1	Aldehyde-alcohol dehydrogenase	-0.163469	7.72206	0.44304	0.97316
ecl8_02345	araJ	Putative transporter AraJ	-0.163047	7.00766	0.580439	0.982818
ecl8_02182	ddpD	putative D,D-dipeptide transport ATP-binding protein DdpD	-0.162949	6.65384	0.572075	0.982818
ecl8_01922	oprF_1	Outer membrane porin F	-0.162674	7.52558	0.571446	0.982818
ecl8_00772	dsbC	Thiol:disulfide interchange protein DsbC	-0.162672	7.285	0.500122	0.981867
ecl8_00260	uspB	Universal stress protein B	-0.162456	8.6575	0.4465	0.97316
ecl8_03922	ecl8_03922	hypothetical protein	-0.162274	6.30353	0.622044	0.991327
ecl8_02903	yciV	5'-3' exoribonuclease	-0.162199	6.53866	0.597228	0.985523
ecl8_01826	edd	Phosphogluconate dehydratase	-0.16216	7.90214	0.419049	0.959094
ecl8_03994	ampH	D-alanyl-D-alanine- carboxypeptidase/endopeptidase AmpH	-0.161806	8.19095	0.399968	0.957347
ecl8_00214	eptB	Kdo(2)-lipid A phosphoethanolamine 7''-transferase	-0.161775	8.51049	0.384096	0.956928
ecl8_00613	yvqK_1	Cob(I)yrinic acid a,c-diamide adenosyltransferase	-0.161677	7.15734	0.605908	0.988117
ecl8_02989	ecl8_02989	hypothetical protein	-0.16157	5.38715	0.717274	0.993292
ecl8_03568	uspG_3	Universal stress protein UP12	-0.1614	6.25267	0.662002	0.993292
ecl8_02999	ecl8_02999	hypothetical protein	-0.160926	6.71021	0.577952	0.982818
ecl8_03121	dmlR_15	HTH-type transcriptional regulator DmlR	-0.160856	7.45848	0.47751	0.981867
ecl8_04936	yijD	Inner membrane protein YijD	-0.160532	7.39289	0.487747	0.981867
ecl8_00927	pduF	Propanediol diffusion facilitator	-0.160518	8.96632	0.399273	0.957347
ecl8_00977	sdaB	L-serine dehydratase 2	-0.160245	7.58756	0.458019	0.97608
ecl8_03842	fetB	putative iron export permease protein FetB	-0.160048	8.67231	0.40638	0.957506
ecl8_01593	ecl8_01593	hypothetical protein	-0.159438	7.17429	0.600539	0.985601
ecl8_03008	cydB_2	Cytochrome bd-I ubiquinol oxidase subunit 2	-0.159091	7.38705	0.540327	0.982617
ecl8_00081	nlpA	Lipoprotein 28	-0.158654	7.74493	0.502927	0.981867
ecl8_04246	ecl8_04246	hypothetical protein	-0.158591	5.28248	0.751245	0.999175
ecl8_04796	yjaB_2	putative N-acetyltransferase YjaB	-0.158588	6.95846	0.583487	0.982818
ecl8_02371	ecl8_02371	hypothetical protein	-0.158533	5.09498	0.821708	1
ecl8_04955	metL	Bifunctional aspartokinase/homoserine dehydrogenase 2	-0.15852	9.29407	0.388973	0.956928
ecl8_02462	ulaC_1	Ascorbate-specific PTS system EIIA component	-0.158489	6.40147	0.620313	0.991325
ecl8_05036	rbsA_5	Ribose import ATP-binding protein RbsA	-0.158255	8.65178	0.458033	0.97608
ecl8_03128	efeO	Iron uptake system component EfeO	-0.157998	7.31269	0.511596	0.981867
ecl8_01406	ecl8_01406	hypothetical protein	-0.157997	7.93952	0.580999	0.982818
ecl8_03554	rlpA	Endolytic peptidoglycan transglycosylase RlpA	-0.157811	7.26869	0.52761	0.982617
ecl8_02030	ydiK	Putative transport protein YdiK	-0.157348	7.57751	0.507822	0.981867
ecl8_04313	thrB	Homoserine kinase	-0.157058	7.19954	0.519658	0.981867
ecl8_02874	ecl8_02874	hypothetical protein	-0.157054	8.28082	0.41274	0.957506
ecl8_02956	topB	DNA topoisomerase 3	-0.156978	7.45519	0.517799	0.981867
ecl8_01790	ftnA_1	Bacterial non-heme ferritin	-0.156652	8.95736	0.417087	0.958111
ecl8_03928	ecl8_03928	hypothetical protein	-0.156329	6.92445	0.557755	0.982818
ecl8_04439	cusR_1	Transcriptional regulatory protein CusR	-0.156285	7.58656	0.494316	0.981867
ecl8_03892	ecl8_03892	hypothetical protein	-0.155392	7.94504	0.49231	0.981867
ecl8_03355	gsiA_2	Glutathione import ATP-binding protein GsiA	-0.15526	7.94803	0.445987	0.97316
ecl8_03641	dppB_2	Dipeptide transport system permease protein DppB	-0.155243	7.5683	0.582262	0.982818
ecl8_05198	ecl8_05198	hypothetical protein	-0.155196	7.2039	0.563613	0.982818
ecl8_02498	ecl8_02498	hypothetical protein	-0.155076	7.04366	0.578582	0.982818
ecl8_03356	iaaA	Isoaspartyl peptidase	-0.155007	6.9689	0.568123	0.982818
ecl8_01675	manC1	Mannose-1-phosphate guanylyltransferase 1	-0.154956	8.5085	0.628064	0.993292
ecl8_02665	citG_1	2-(5''-triphosphoribosyl)-3'-dephosphocoenzyme-A synthase	-0.154878	5.25471	0.721052	0.993299
ecl8_01200	clpB	Chaperone protein ClpB	-0.154837	9.64487	0.392131	0.956928
ecl8_02361	dmlR_10	HTH-type transcriptional regulator DmlR	-0.154706	6.97403	0.619365	0.991325
ecl8_00267	nikD	Nickel import ATP-binding protein NikD	-0.15465	7.96954	0.460056	0.977274
ecl8_02027	aroH	Phospho-2-dehydro-3-deoxyheptonate aldolase, Trp-sensitive	-0.154575	6.74809	0.568386	0.982818
ecl8_02049	betI_1	HTH-type transcriptional regulator BetI	-0.154436	7.67223	0.486264	0.981867
ecl8_01747	pmrD	Signal transduction protein PmrD	-0.154395	7.02326	0.553989	0.982818
ecl8_03620	entD	Enterobactin synthase component D	-0.153828	5.69767	0.709997	0.993292
ecl8_00857	yqeG	Inner membrane transport protein YqeG	-0.153672	8.19049	0.520287	0.981867
ecl8_03800	ecl8_03800	hypothetical protein	-0.153152	6.90284	0.581685	0.982818
ecl8_04050	acoB	Acetoin:2,6-dichlorophenolindophenol oxidoreductase subunit beta	-0.153121	7.71981	0.461853	0.977363
ecl8_01138	acoR_1	Acetoin catabolism regulatory protein	-0.153119	6.68823	0.587925	0.982818
ecl8_01503	menF	Isochorismate synthase MenF	-0.152704	6.99495	0.56609	0.982818
ecl8_01264	ecl8_01264	hypothetical protein	-0.152688	7.42712	0.508253	0.981867
ecl8_03985	iraP	Anti-adapter protein IraP	-0.152601	8.58519	0.42764	0.965023
ecl8_03326	ecl8_03326	hypothetical protein	-0.15167	8.55706	0.449633	0.974472
ecl8_00128	gnl	Gluconolactonase	-0.151628	8.30131	0.40487	0.957506
ecl8_04821	celA_3	PTS system cellobiose-specific EIIB component	-0.151622	6.21549	0.670819	0.993292
ecl8_05209	yciC_2	Putative metal chaperone YciC	-0.151378	7.03003	0.557311	0.982818
ecl8_01847	prc	Tail-specific protease	-0.151293	7.02662	0.80842	1
ecl8_00518	yhbY	RNA-binding protein YhbY	-0.151125	6.42228	0.634851	0.993292
ecl8_04749	alr	Alanine racemase, biosynthetic	-0.151017	7.8063	0.453255	0.975637
ecl8_04138	cdaR_2	Carbohydrate diacid regulator	-0.150662	7.9261	0.459366	0.977162
ecl8_05160	ecl8_05160	hypothetical protein	-0.150625	5.94717	0.673746	0.993292
ecl8_04413	ecl8_04413	hypothetical protein	-0.150367	7.82393	0.483455	0.981867
ecl8_01952	ecl8_01952	hypothetical protein	-0.150359	6.11121	0.714591	0.993292
ecl8_01746	amn	AMP nucleosidase	-0.150257	8.4077	0.438172	0.968824
ecl8_03461	zitB	Zinc transporter ZitB	-0.15023	6.80644	0.584696	0.982818
ecl8_03168	oppA_2	Periplasmic oligopeptide-binding protein	-0.150213	8.65028	0.413271	0.957506
ecl8_00714	mutY	Adenine DNA glycosylase	-0.150053	7.64283	0.513924	0.981867
ecl8_01867	yabJ_1	2-iminobutanoate/2-iminopropanoate deaminase	-0.149908	6.3989	0.63437	0.993292
ecl8_04745	yjbR_2	putative protein YjbR	-0.149346	6.61162	0.649942	0.993292
ecl8_02301	fecA_1	Fe(3+) dicitrate transport protein FecA	-0.149109	8.6852	0.460921	0.977363
ecl8_01789	ecl8_01789	hypothetical protein	-0.149019	6.65659	0.596285	0.985275
ecl8_02056	sufS	Cysteine desulfurase	-0.148954	7.64311	0.482486	0.981867
ecl8_00549	ecl8_00549	Putative two-component membrane permease complex subunit SMU_747c	-0.148858	7.9422	0.475126	0.981867
ecl8_02868	auaH_1	Aurachin B dehydrogenase	-0.148742	6.95878	0.613684	0.989946
ecl8_02736	gdhA_1	Glutamate dehydrogenase	-0.148705	7.30038	0.536978	0.982617
ecl8_03043	gabD_1	Succinate-semialdehyde dehydrogenase [NADP(+)]	-0.148528	7.14535	0.574879	0.982818
ecl8_01213	grcA	Autonomous glycyl radical cofactor	-0.148145	5.25173	0.717082	0.993292
ecl8_03643	dppD_2	Dipeptide transport ATP-binding protein DppD	-0.147922	7.32714	0.567901	0.982818
ecl8_04583	cysQ	3'(2'),5'-bisphosphate nucleotidase CysQ	-0.147914	7.13246	0.553816	0.982818
ecl8_03436	ecl8_03436	hypothetical protein	-0.147424	8.80504	0.428755	0.965603
ecl8_03455	galT	Galactose-1-phosphate uridylyltransferase	-0.14741	7.10797	0.582637	0.982818
ecl8_03616	entF	Enterobactin synthase component F	-0.147354	8.42619	0.447943	0.97316
ecl8_04541	licC_6	Lichenan permease IIC component	-0.147102	7.73796	0.506848	0.981867
ecl8_00283	yhhQ	Queuosine precursor transporter	-0.14704	7.48029	0.511668	0.981867
ecl8_02931	chbA_4	PTS system N,N'-diacetylchitobiose-specific EIIA component	-0.147033	6.21116	0.672806	0.993292
ecl8_01628	rbtD	Ribitol 2-dehydrogenase	-0.146991	6.54563	0.672058	0.993292
ecl8_02431	ecl8_02431	hypothetical protein	-0.146752	5.99471	0.696293	0.993292
ecl8_00312	ecl8_00312	hypothetical protein	-0.146736	7.45275	0.575761	0.982818
ecl8_02066	aroE_2	Shikimate dehydrogenase (NADP(+))	-0.146541	5.0434	0.737913	0.998161
ecl8_02981	umuD	Protein UmuD	-0.146431	6.00913	0.696234	0.993292
ecl8_00723	ecl8_00723	hypothetical protein	-0.146179	5.75845	0.690931	0.993292
ecl8_01063	hypD	Hydrogenase maturation factor HypD	-0.146158	7.42398	0.533101	0.982617
ecl8_03212	dpaL	Diaminopropionate ammonia-lyase	-0.145975	8.73411	0.458468	0.976143
ecl8_02279	appC	Cytochrome bd-II ubiquinol oxidase subunit 1	-0.145966	8.48398	0.456316	0.975637
ecl8_02776	feaR	Transcriptional activator FeaR	-0.145716	6.87136	0.588914	0.982848
ecl8_02379	ydeP	Protein YdeP	-0.145564	8.60965	0.426353	0.963065
ecl8_01838	ecl8_01838	hypothetical protein	-0.145542	8.95872	0.443692	0.97316
ecl8_00911	rnfC	Electron transport complex subunit RnfC	-0.145524	7.76283	0.482075	0.981867
ecl8_01303	bamC	Outer membrane protein assembly factor BamC	-0.145251	7.69109	0.546403	0.982818
ecl8_01011	truD	tRNA pseudouridine synthase D	-0.144651	7.31567	0.542479	0.982818
ecl8_04816	thiF	Sulfur carrier protein ThiS adenylyltransferase	-0.144632	7.73638	0.553759	0.982818
ecl8_03140	rutE	putative malonic semialdehyde reductase RutE	-0.144472	5.62023	0.741069	0.998161
ecl8_00664	ygiN	putative quinol monooxygenase YgiN	-0.144281	6.63797	0.685904	0.993292
ecl8_01026	xerC_2	Tyrosine recombinase XerC	-0.143999	7.65425	0.489965	0.981867
ecl8_00544	ecl8_00544	hypothetical protein	-0.143785	6.97086	0.583767	0.982818
ecl8_04783	sorF	PTS system sorbose-specific EIIA component	-0.143363	7.0309	0.579907	0.982818
ecl8_02486	ecl8_02486	hypothetical protein	-0.142797	7.62039	0.515644	0.981867
ecl8_04920	ilvE	Branched-chain-amino-acid aminotransferase	-0.142723	8.5527	0.471193	0.9813
ecl8_03572	ybdO_2	putative HTH-type transcriptional regulator YbdO	-0.142398	7.77484	0.518947	0.981867
ecl8_02068	modA_1	Molybdate-binding protein ModA	-0.142371	7.3459	0.573445	0.982818
ecl8_00990	barA_2	Signal transduction histidine-protein kinase BarA	-0.142359	9.15187	0.482343	0.981867
ecl8_03774	ecl8_03774	hypothetical protein	-0.141985	8.32391	0.474243	0.981567
ecl8_01485	yfbR	5'-deoxynucleotidase YfbR	-0.141925	7.37378	0.575189	0.982818
ecl8_00698	ecl8_00698	hypothetical protein	-0.141635	8.34797	0.512729	0.981867
ecl8_02996	lpxP	Lipid A biosynthesis palmitoleoyltransferase	-0.141566	8.04116	0.462436	0.977363
ecl8_04067	yafP_2	putative N-acetyltransferase YafP	-0.141442	6.47798	0.63876	0.993292
ecl8_01803	yesR	Unsaturated rhamnogalacturonyl hydrolase YesR	-0.141316	7.43951	0.538469	0.982617
ecl8_01659	ecl8_01659	hypothetical protein	-0.141269	8.1042	0.638715	0.993292
ecl8_01266	yfhM	putative lipoprotein YfhM	-0.140868	8.89545	0.513902	0.981867
ecl8_00382	slyD	FKBP-type peptidyl-prolyl cis-trans isomerase SlyD	-0.140845	7.80031	0.580255	0.982818
ecl8_02320	cysW_3	Sulfate transport system permease protein CysW	-0.14074	7.73959	0.497819	0.981867
ecl8_03132	putP_2	Sodium/proline symporter	-0.140728	9.3001	0.437675	0.968722
ecl8_02138	ecl8_02138	hypothetical protein	-0.140686	6.60949	0.66706	0.993292
ecl8_03023	smc	Chromosome partition protein Smc	-0.140536	9.00552	0.44654	0.97316
ecl8_02748	yrdA_2	Protein YrdA	-0.140504	6.39738	0.652448	0.993292
ecl8_00641	ureA	Urease subunit gamma	-0.140076	5.96881	0.697057	0.993292
ecl8_04838	birA_2	Bifunctional ligase/repressor BirA	-0.140041	5.66243	0.768502	0.999175
ecl8_03275	ybjP	putative lipoprotein YbjP	-0.139938	6.77581	0.636873	0.993292
ecl8_02661	mdtJ_2	Spermidine export protein MdtJ	-0.139885	7.71073	0.556391	0.982818
ecl8_03305	ecl8_03305	hypothetical protein	-0.139701	10.0979	0.447279	0.97316
ecl8_04408	mdtM_2	Multidrug resistance protein MdtM	-0.139493	7.95384	0.491154	0.981867
ecl8_01434	ecl8_01434	hypothetical protein	-0.139042	6.48165	0.67051	0.993292
ecl8_04325	slt	Soluble lytic murein transglycosylase	-0.138945	8.51185	0.4739	0.9813
ecl8_00299	livK	Leucine-specific-binding protein	-0.138538	7.69654	0.530354	0.982617
ecl8_00568	yqjF	Inner membrane protein YqjF	-0.138478	5.76618	0.767539	0.999175
ecl8_01811	yecD	Isochorismatase family protein YecD	-0.137819	6.28712	0.681277	0.993292
ecl8_03302	ecl8_03302	hypothetical protein	-0.137784	8.50293	0.486056	0.981867
ecl8_02481	rbsR_1	Ribose operon repressor	-0.137689	7.6721	0.518801	0.981867
ecl8_03690	yegT	Putative nucleoside transporter YegT	-0.137635	8.24395	0.483066	0.981867
ecl8_04022	phnC	Phosphate-import ATP-binding protein PhnC	-0.137397	7.44606	0.573696	0.982818
ecl8_01282	chuR_2	Anaerobic sulfatase-maturating enzyme	-0.137014	8.79677	0.49479	0.981867
ecl8_02145	hbd	3-hydroxybutyryl-CoA dehydrogenase	-0.136983	6.85956	0.641526	0.993292
ecl8_02823	ecl8_02823	hypothetical protein	-0.136714	7.2221	0.620334	0.991325
ecl8_00803	amt	Ammonia channel	-0.136411	9.05048	0.463456	0.978171
ecl8_01765	vsr	Very short patch repair protein	-0.136387	5.88389	0.711077	0.993292
ecl8_02490	pgtB	Phosphoglycerate transport system sensor protein PgtB	-0.136353	8.54907	0.523044	0.981867
ecl8_00582	iolU_1	scyllo-inositol 2-dehydrogenase (NADP(+)) IolU	-0.135987	7.71357	0.557614	0.982818
ecl8_02867	ecl8_02867	hypothetical protein	-0.135935	6.97492	0.612689	0.989381
ecl8_03418	bioD1_2	ATP-dependent dethiobiotin synthetase BioD 1	-0.135755	6.39749	0.666401	0.993292
ecl8_02585	putP_1	High-affinity proline transporter PutP	-0.135641	8.75277	0.510353	0.981867
ecl8_03286	potH	Putrescine transport system permease protein PotH	-0.135616	7.07523	0.623832	0.991363
ecl8_02456	ecl8_02456	hypothetical protein	-0.135482	7.80315	0.529644	0.982617
ecl8_00813	ecl8_00813	hypothetical protein	-0.135463	8.0714	0.497519	0.981867
ecl8_01354	cysZ	Sulfate transporter CysZ	-0.135376	7.76153	0.509427	0.981867
ecl8_05243	ecl8_05243	hypothetical protein	-0.135063	7.97837	0.532508	0.982617
ecl8_02769	gltC_4	HTH-type transcriptional regulator GltC	-0.13501	8.90697	0.511034	0.981867
ecl8_01656	alkA	DNA-3-methyladenine glycosylase 2	-0.134872	6.74689	0.713455	0.993292
ecl8_02221	ecl8_02221	hypothetical protein	-0.134082	4.93086	0.743997	0.998161
ecl8_04861	ecl8_04861	hypothetical protein	-0.133969	8.6781	0.527986	0.982617
ecl8_01939	dauA_1	C4-dicarboxylic acid transporter DauA	-0.133957	8.00151	0.521174	0.981867
ecl8_03991	ecl8_03991	hypothetical protein	-0.133692	7.45907	0.562367	0.982818
ecl8_04154	outC	Type II secretion system protein C	-0.133581	9.69794	0.495001	0.981867
ecl8_05124	ecl8_05124	hypothetical protein	-0.133499	8.66708	0.502013	0.981867
ecl8_02553	metQ_3	D-methionine-binding lipoprotein MetQ	-0.133372	6.917	0.616834	0.991325
ecl8_01891	ecl8_01891	hypothetical protein	-0.132564	8.02419	0.499449	0.981867
ecl8_02890	acnA	Aconitate hydratase A	-0.132551	8.5759	0.472703	0.9813
ecl8_03210	amaB_2	N-carbamoyl-L-amino acid hydrolase	-0.132443	7.60227	0.574099	0.982818
ecl8_00322	glgA	Glycogen synthase	-0.132312	8.31048	0.487089	0.981867
ecl8_00883	aas	Bifunctional protein Aas	-0.132136	8.62135	0.473208	0.9813
ecl8_02627	pncC_3	Nicotinamide-nucleotide amidohydrolase PncC	-0.131895	7.02246	0.609843	0.98899
ecl8_02702	pntA	NAD(P) transhydrogenase subunit alpha	-0.13179	7.57778	0.552818	0.982818
ecl8_04449	ecl8_04449	hypothetical protein	-0.131789	8.08632	0.536329	0.982617
ecl8_01014	nlpD_2	Murein hydrolase activator NlpD	-0.131756	7.89306	0.571995	0.982818
ecl8_04979	lsrB_3	Autoinducer 2-binding protein LsrB	-0.131218	7.37021	0.586622	0.982818
ecl8_01654	walK	Sensor histidine kinase WalK	-0.131198	7.68161	0.658084	0.993292
ecl8_01020	ecdB	putative UbiX-like flavin prenyltransferase	-0.130969	6.9549	0.615906	0.991325
ecl8_02365	yciE_1	Protein YciE	-0.130733	7.49832	0.693413	0.993292
ecl8_01121	proV	Glycine betaine/proline betaine transport system ATP-binding protein ProV	-0.130649	9.56743	0.484448	0.981867
ecl8_02165	yeaX_1	Carnitine monooxygenase reductase subunit	-0.130543	7.76194	0.521809	0.981867
ecl8_00049	phnU	Putative 2-aminoethylphosphonate transport system permease protein PhnU	-0.130121	7.70594	0.629263	0.993292
ecl8_04396	hpaC	4-hydroxyphenylacetate 3-monooxygenase reductase component	-0.130071	8.40002	0.487114	0.981867
ecl8_04456	lamB_3	Maltoporin	-0.130008	8.5323	0.481636	0.981867
ecl8_00302	lptB_1	Lipopolysaccharide export system ATP-binding protein LptB	-0.129774	7.20021	0.599435	0.985563
ecl8_04701	rbsA_3	Ribose import ATP-binding protein RbsA	-0.12967	8.27208	0.501379	0.981867
ecl8_00732	endA	Endonuclease-1	-0.129436	6.69764	0.652241	0.993292
ecl8_05259	ecl8_05259	hypothetical protein	-0.129077	6.80203	0.642936	0.993292
ecl8_02983	ecl8_02983	hypothetical protein	-0.128952	8.77026	0.560317	0.982818
ecl8_04192	ecl8_04192	hypothetical protein	-0.128868	8.07435	0.523587	0.981867
ecl8_02256	frmA	S-(hydroxymethyl)glutathione dehydrogenase	-0.128798	7.98704	0.505429	0.981867
ecl8_03273	cph2	Phytochrome-like protein cph2	-0.128712	9.85715	0.477358	0.981867
ecl8_03097	mdtH_2	Multidrug resistance protein MdtH	-0.128583	7.46998	0.579468	0.982818
ecl8_03070	thiK	Thiamine kinase	-0.128559	6.7969	0.650499	0.993292
ecl8_03758	ecl8_03758	hypothetical protein	-0.128375	10.6633	0.487346	0.981867
ecl8_01779	ecl8_01779	hypothetical protein	-0.128088	8.06996	0.51144	0.981867
ecl8_01733	ecl8_01733	hypothetical protein	-0.128045	8.4733	0.492717	0.981867
ecl8_01147	pheC	Cyclohexadienyl dehydratase	-0.127839	8.99257	0.491821	0.981867
ecl8_02733	astD_1	N-succinylglutamate 5-semialdehyde dehydrogenase	-0.127767	6.89771	0.632475	0.993292
ecl8_00873	ecl8_00873	hypothetical protein	-0.127672	8.50082	0.513712	0.981867
ecl8_02312	yecS_2	L-cystine transport system permease protein YecS	-0.127581	7.77046	0.591708	0.983136
ecl8_02095	yusV	putative siderophore transport system ATP-binding protein YusV	-0.127536	6.90566	0.630608	0.993292
ecl8_01194	ecl8_01194	6-deoxy-6-sulfogluconolactonase	-0.127468	7.49312	0.578262	0.982818
ecl8_00259	uspA_1	Universal stress protein A	-0.12742	9.03977	0.501784	0.981867
ecl8_00601	ebgA	Evolved beta-galactosidase subunit alpha	-0.12741	8.91423	0.499745	0.981867
ecl8_02968	yeaD	Putative glucose-6-phosphate 1-epimerase	-0.127266	7.52616	0.563992	0.982818
ecl8_02714	ydgA	Protein YdgA	-0.127129	7.70305	0.5381	0.982617
ecl8_01318	eutS	Ethanolamine utilization protein EutS	-0.126892	7.70669	0.55194	0.982818
ecl8_04989	ecl8_04989	hypothetical protein	-0.126877	7.11236	0.635652	0.993292
ecl8_02250	ecl8_02250	putative transporter	-0.12681	7.99499	0.543929	0.982818
ecl8_01542	ecl8_01542	Magnesium transporter MgtE	-0.126707	7.1976	0.677139	0.993292
ecl8_02672	gltC_3	HTH-type transcriptional regulator GltC	-0.126667	7.51268	0.604476	0.987912
ecl8_02140	budB	Acetolactate synthase, catabolic	-0.126609	7.76195	0.536813	0.982617
ecl8_04215	lpxC	UDP-3-O-acyl-N-acetylglucosamine deacetylase	-0.126573	5.27778	0.785703	1
ecl8_00551	diaA	DnaA initiator-associating protein DiaA	-0.126258	6.37203	0.737513	0.998161
ecl8_04380	dan	D-aminoacylase	-0.12608	7.99378	0.534392	0.982617
ecl8_00204	ttuB_1	Putative tartrate transporter	-0.125994	8.36588	0.492538	0.981867
ecl8_01325	adhE_3	Aldehyde-alcohol dehydrogenase	-0.125594	7.08378	0.635349	0.993292
ecl8_02028	ppsR	Phosphoenolpyruvate synthase regulatory protein	-0.125543	8.37263	0.566768	0.982818
ecl8_02623	ygbN	Inner membrane permease YgbN	-0.125087	7.77578	0.542322	0.982818
ecl8_04072	nqrE	Na(+)-translocating NADH-quinone reductase subunit E	-0.125045	7.06136	0.670715	0.993292
ecl8_02112	cysW_2	Sulfate transport system permease protein CysW	-0.124621	8.32711	0.494315	0.981867
ecl8_01374	ipdC	Indole-3-pyruvate decarboxylase	-0.124113	8.16011	0.501002	0.981867
ecl8_01388	ecl8_01388	hypothetical protein	-0.123953	8.21628	0.513985	0.981867
ecl8_04393	ttuB_3	Putative tartrate transporter	-0.123951	7.88283	0.573933	0.982818
ecl8_01932	ecl8_01932	hypothetical protein	-0.123551	7.44221	0.650364	0.993292
ecl8_01081	hypF	Carbamoyltransferase HypF	-0.123233	8.13644	0.544356	0.982818
ecl8_01505	menH	2-succinyl-6-hydroxy-2, 4-cyclohexadiene-1-carboxylate synthase	-0.123219	6.23668	0.766186	0.999175
ecl8_02090	ssuA_2	Putative aliphatic sulfonates-binding protein	-0.123069	6.63177	0.69767	0.993292
ecl8_03393	fabG_12	3-oxoacyl-[acyl-carrier-protein] reductase FabG	-0.123024	8.09928	0.532935	0.982617
ecl8_01299	yhhT_2	Putative transport protein YhhT	-0.122299	7.55834	0.62434	0.991827
ecl8_01877	ycgM	putative protein YcgM	-0.122191	7.21332	0.642631	0.993292
ecl8_03239	ycaO	Ribosomal protein S12 methylthiotransferase accessory factor YcaO	-0.122137	8.88162	0.508683	0.981867
ecl8_04069	ecl8_04069	hypothetical protein	-0.121845	6.95795	0.669317	0.993292
ecl8_03324	ecl8_03324	hypothetical protein	-0.121728	6.50064	0.700425	0.993292
ecl8_03495	ecl8_03495	hypothetical protein	-0.12168	5.74395	0.744527	0.998161
ecl8_03893	ecl8_03893	hypothetical protein	-0.12159	6.62106	0.698399	0.993292
ecl8_01903	tdcE	PFL-like enzyme TdcE	-0.121481	7.54488	0.600355	0.985601
ecl8_03582	rbsC_3	Ribose import permease protein RbsC	-0.121313	6.96125	0.64961	0.993292
ecl8_03662	dppA_3	Periplasmic dipeptide transport protein	-0.121302	8.56913	0.575979	0.982818
ecl8_04166	outO_2	Type 4 prepilin-like proteins leader peptide-processing enzyme	-0.121237	6.49902	0.71916	0.993292
ecl8_02356	ecl8_02356	hypothetical protein	-0.121169	6.72808	0.676647	0.993292
ecl8_04422	lsrD_2	Autoinducer 2 import system permease protein LsrD	-0.121036	7.61081	0.59088	0.982848
ecl8_03705	atsA	Arylsulfatase	-0.120829	8.34828	0.519559	0.981867
ecl8_00945	cobQ	Cobyric acid synthase	-0.120786	7.88524	0.56788	0.982818
ecl8_02700	ecl8_02700	hypothetical protein	-0.120773	4.88986	0.80695	1
ecl8_04592	oapA	Opacity-associated protein OapA	-0.12073	7.90107	0.540417	0.982617
ecl8_03781	ecl8_03781	hypothetical protein	-0.120629	7.8893	0.560718	0.982818
ecl8_00101	glpF_1	Glycerol uptake facilitator protein	-0.120611	7.35791	0.611267	0.98899
ecl8_01544	mqo_1	Malate:quinone oxidoreductase	-0.120334	7.95511	0.538207	0.982617
ecl8_01563	appA_2	Oligopeptide-binding protein AppA	-0.120145	7.85123	0.653404	0.993292
ecl8_04576	msrA	Peptide methionine sulfoxide reductase MsrA	-0.120113	7.78417	0.555479	0.982818
ecl8_00464	tldD	Metalloprotease TldD	-0.119938	8.58378	0.513002	0.981867
ecl8_00578	uxaA	Altronate dehydratase	-0.119891	8.55561	0.563978	0.982818
ecl8_03330	ecl8_03330	hypothetical protein	-0.119766	6.70195	0.67174	0.993292
ecl8_02932	chbC	PTS system N,N'-diacetylchitobiose-specific EIIC component	-0.119717	8.53794	0.608397	0.988699
ecl8_03752	ecl8_03752	hypothetical protein	-0.119334	9.27178	0.50621	0.981867
ecl8_02351	gsiB_1	Glutathione-binding protein GsiB	-0.119185	7.53232	0.592267	0.983299
ecl8_03503	kdpB	Potassium-transporting ATPase ATP-binding subunit	-0.119135	7.97584	0.580319	0.982818
ecl8_02838	ecl8_02838	hypothetical protein	-0.119082	6.04953	0.74791	0.998733
ecl8_00197	hokA_1	Protein HokA	-0.118943	6.6606	0.700826	0.993292
ecl8_04556	ecl8_04556	hypothetical protein	-0.117991	5.41557	0.812063	1
ecl8_01768	dgcQ	putative diguanylate cyclase DgcQ	-0.117845	8.2204	0.518485	0.981867
ecl8_03383	rlmF	Ribosomal RNA large subunit methyltransferase F	-0.117697	6.83313	0.677953	0.993292
ecl8_04392	hpcH	4-hydroxy-2-oxo-heptane-1,7-dioate aldolase	-0.117607	6.77633	0.673324	0.993292
ecl8_04510	ecl8_04510	hypothetical protein	-0.117331	7.78681	0.581747	0.982818
ecl8_02590	sotB_1	Sugar efflux transporter	-0.117252	7.66911	0.581159	0.982818
ecl8_00336	feoC	putative [Fe-S]-dependent transcriptional repressor	-0.117225	5.73589	0.753363	0.999175
ecl8_00607	dhaK_1	Dihydroxyacetone kinase	-0.11701	7.712	0.582469	0.982818
ecl8_01756	erfK	putative L,D-transpeptidase ErfK/SrfK	-0.11696	8.03797	0.569237	0.982818
ecl8_01244	xylE	D-xylose-proton symporter	-0.116925	8.09183	0.592984	0.983459
ecl8_02308	yxeP	putative hydrolase YxeP	-0.116597	7.45944	0.628069	0.993292
ecl8_01165	ecl8_01165	hypothetical protein	-0.116213	6.84596	0.715153	0.993292
ecl8_04074	nqrC	Na(+)-translocating NADH-quinone reductase subunit C	-0.115306	7.24613	0.695814	0.993292
ecl8_05249	acsA	Acetyl-coenzyme A synthetase	-0.115166	9.31144	0.536532	0.982617
ecl8_01077	bglH_1	Aryl-phospho-beta-D-glucosidase BglH	-0.115083	8.06412	0.618733	0.991325
ecl8_00208	yiaD	putative lipoprotein YiaD	-0.114953	7.9166	0.561816	0.982818
ecl8_02251	ecl8_02251	putative HTH-type transcriptional regulator	-0.1148	7.19746	0.686973	0.993292
ecl8_05173	cusR_2	Transcriptional regulatory protein CusR	-0.114764	6.59078	0.698328	0.993292
ecl8_00186	yiaA	Inner membrane protein YiaA	-0.114669	7.65693	0.595694	0.985275
ecl8_04048	pknK	Serine/threonine-protein kinase PknK	-0.114647	9.58789	0.555929	0.982818
ecl8_00239	bcsC	Cellulose synthase operon protein C	-0.114497	9.24732	0.531719	0.982617
ecl8_05167	ecl8_05167	hypothetical protein	-0.114299	8.13762	0.611257	0.98899
ecl8_04702	rbsC_8	Ribose import permease protein RbsC	-0.114149	7.88067	0.565525	0.982818
ecl8_00016	ibpB	Small heat shock protein IbpB	-0.114055	7.84657	0.593585	0.984101
ecl8_00704	yraJ	Outer membrane usher protein YraJ	-0.113742	9.75332	0.536594	0.982617
ecl8_03404	ybhN	Inner membrane protein YbhN	-0.11325	7.11324	0.663066	0.993292
ecl8_02908	trpA	Tryptophan synthase alpha chain	-0.112635	6.31554	0.746423	0.998733
ecl8_03189	sulA	Cell division inhibitor SulA	-0.112595	7.7306	0.597709	0.985563
ecl8_02895	sohB	putative protease SohB	-0.112502	7.11146	0.673009	0.993292
ecl8_00850	htrE_1	Outer membrane usher protein HtrE	-0.112405	9.42178	0.536554	0.982617
ecl8_02422	hyuA	Hydantoin racemase	-0.112325	6.42626	0.74119	0.998161
ecl8_03978	yaiA	putative protein YaiA	-0.112218	5.71997	0.795388	1
ecl8_01084	norV	Anaerobic nitric oxide reductase flavorubredoxin	-0.112006	8.2934	0.574378	0.982818
ecl8_04882	ecl8_04882	hypothetical protein	-0.111757	5.52517	0.791051	1
ecl8_01985	oppC	Oligopeptide transport system permease protein OppC	-0.111622	6.88385	0.702751	0.993292
ecl8_03201	pyrD	Dihydroorotate dehydrogenase (quinone)	-0.111227	9.95156	0.563201	0.982818
ecl8_03581	alsC	D-allose transport system permease protein AlsC	-0.110887	6.75236	0.705742	0.993292
ecl8_02254	cybB	Cytochrome b561	-0.110429	7.02472	0.699764	0.993292
ecl8_02245	ydgK	Inner membrane protein YdgK	-0.11035	7.56522	0.658687	0.993292
ecl8_03429	hutI	Imidazolonepropionase	-0.110346	6.08204	0.780863	0.999258
ecl8_01565	mepS_1	Murein DD-endopeptidase MepS/Murein LD-carboxypeptidase	-0.110329	7.87851	0.575496	0.982818
ecl8_01740	ecl8_01740	Putative 2-dehydropantoate 2-reductase	-0.110319	7.15997	0.648551	0.993292
ecl8_03538	gltI	Glutamate/aspartate import solute-binding protein	-0.110214	7.66404	0.606468	0.988117
ecl8_00871	araQ	L-arabinose transport system permease protein AraQ	-0.110024	7.70323	0.609664	0.98899
ecl8_05179	silP	Silver exporting P-type ATPase	-0.109653	8.51385	0.550846	0.982818
ecl8_03713	btuF_1	Vitamin B12-binding protein	-0.109556	7.84053	0.596435	0.985275
ecl8_02199	ydfG_1	NADP-dependent 3-hydroxy acid dehydrogenase YdfG	-0.109523	6.88496	0.680705	0.993292
ecl8_03832	ecl8_03832	hypothetical protein	-0.109508	6.35772	0.739398	0.998161
ecl8_04782	bacC	Dihydroanticapsin 7-dehydrogenase	-0.10949	7.96251	0.586955	0.982818
ecl8_04464	ydcV_4	Inner membrane ABC transporter permease protein YdcV	-0.108889	8.44508	0.560137	0.982818
ecl8_04152	outB	General secretion pathway protein B	-0.108761	9.85785	0.546269	0.982818
ecl8_04685	melR	Melibiose operon regulatory protein	-0.108628	7.80267	0.589746	0.982848
ecl8_02471	ecl8_02471	hypothetical protein	-0.108605	8.54081	0.568465	0.982818
ecl8_00826	dtpT	Di-/tripeptide transporter	-0.108429	8.57259	0.576004	0.982818
ecl8_03738	cadC	Transcriptional activator CadC	-0.108337	10.306	0.564767	0.982818
ecl8_04815	thiE	Thiamine-phosphate synthase	-0.108177	7.55741	0.660472	0.993292
ecl8_01281	betC	Choline-sulfatase	-0.108029	9.64558	0.575747	0.982818
ecl8_04374	ecl8_04374	hypothetical protein	-0.107933	7.7076	0.675816	0.993292
ecl8_00970	dmoA	Dimethyl-sulfide monooxygenase	-0.107914	7.53267	0.6395	0.993292
ecl8_04091	ecl8_04091	hypothetical protein	-0.107891	6.9629	0.69324	0.993292
ecl8_00819	ecl8_00819	hypothetical protein	-0.107876	8.79373	0.553795	0.982818
ecl8_04586	qorB	Quinone oxidoreductase 2	-0.107873	7.65039	0.609968	0.98899
ecl8_01752	nhaK_1	Sodium, potassium, lithium and rubidium/H(+) antiporter	-0.107783	8.54642	0.578529	0.982818
ecl8_01648	mdtB	Multidrug resistance protein MdtB	-0.107761	8.57005	0.610245	0.98899
ecl8_02061	fumD	Fumarase D	-0.107737	5.74982	0.787902	1
ecl8_01457	pdxB	Erythronate-4-phosphate dehydrogenase	-0.107708	7.87054	0.59961	0.985563
ecl8_00542	yhbU	putative protease YhbU	-0.106977	7.84314	0.600344	0.985601
ecl8_05141	ecl8_05141	hypothetical protein	-0.106965	6.96092	0.694317	0.993292
ecl8_00657	ecl8_00657	hypothetical protein	-0.106764	7.17758	0.66465	0.993292
ecl8_00090	ecl8_00090	hypothetical protein	-0.106553	5.48148	0.784617	0.999952
ecl8_00630	mug	G/U mismatch-specific DNA glycosylase	-0.106378	7.06369	0.708934	0.993292
ecl8_00884	lplT	Lysophospholipid transporter LplT	-0.106193	7.68993	0.688546	0.993292
ecl8_03279	artM_3	Arginine ABC transporter permease protein ArtM	-0.106022	7.26906	0.701911	0.993292
ecl8_05137	ecl8_05137	hypothetical protein	-0.105857	7.64284	0.652695	0.993292
ecl8_01149	fabG_3	3-oxoacyl-[acyl-carrier-protein] reductase FabG	-0.105723	7.01157	0.709452	0.993292
ecl8_01336	amiA	N-acetylmuramoyl-L-alanine amidase AmiA	-0.105578	7.38274	0.671167	0.993292
ecl8_02435	ecl8_02435	putative HTH-type transcriptional regulator	-0.105143	6.97817	0.704713	0.993292
ecl8_00456	msrP	Protein-methionine-sulfoxide reductase catalytic subunit MsrP	-0.105053	7.63377	0.641111	0.993292
ecl8_00913	adhE_2	Aldehyde-alcohol dehydrogenase	-0.105045	7.08708	0.698262	0.993292
ecl8_01900	tdcB	L-threonine dehydratase catabolic TdcB	-0.104806	9.05424	0.586737	0.982818
ecl8_00270	nikA	Nickel-binding periplasmic protein	-0.104716	8.33013	0.56391	0.982818
ecl8_01737	ecl8_01737	putative transporter	-0.104623	8.57284	0.573071	0.982818
ecl8_04751	qorA	Quinone oxidoreductase 1	-0.104444	7.78167	0.606487	0.988117
ecl8_00067	murQ_1	N-acetylmuramic acid 6-phosphate etherase	-0.104363	7.507	0.64811	0.993292
ecl8_03494	ecl8_03494	hypothetical protein	-0.104228	6.77237	0.703239	0.993292
ecl8_04147	fhuB	Iron(3+)-hydroxamate import system permease protein FhuB	-0.104168	7.82968	0.632675	0.993292
ecl8_01734	ecl8_01734	hypothetical protein	-0.103955	7.14985	0.690236	0.993292
ecl8_02412	iolE_1	Inosose dehydratase	-0.103785	6.92316	0.719415	0.993292
ecl8_01055	licC_3	Lichenan permease IIC component	-0.10362	7.35404	0.720969	0.993299
ecl8_02455	yjhB_1	Putative metabolite transport protein YjhB	-0.103579	7.42579	0.666814	0.993292
ecl8_02043	ecl8_02043	hypothetical protein	-0.103465	6.90525	0.739283	0.998161
ecl8_05165	rpnA_7	Recombination-promoting nuclease RpnA	-0.103462	7.85292	0.610954	0.98899
ecl8_01450	yfcA	putative membrane transporter protein YfcA	-0.103448	6.77798	0.734187	0.998161
ecl8_04204	nadC	Nicotinate-nucleotide pyrophosphorylase [carboxylating]	-0.103391	7.83848	0.611532	0.98899
ecl8_04458	uidB	Glucuronide carrier protein	-0.102955	10.1538	0.587412	0.982818
ecl8_02850	mppA	Periplasmic murein peptide-binding protein	-0.102926	8.36524	0.575561	0.982818
ecl8_02092	ssuC_1	Putative aliphatic sulfonates transport permease protein SsuC	-0.10278	6.97761	0.720066	0.993299
ecl8_02731	astE_1	Succinylglutamate desuccinylase	-0.102706	6.1534	0.806738	1
ecl8_02261	ecl8_02261	hypothetical protein	-0.102684	7.67849	0.641476	0.993292
ecl8_01619	adeQ	Adenine permease AdeQ	-0.102515	7.14201	0.718823	0.993292
ecl8_00314	yhhW_1	Quercetin 2,3-dioxygenase	-0.102376	7.60338	0.6345	0.993292
ecl8_01637	ddpA_1	putative D,D-dipeptide-binding periplasmic protein DdpA	-0.102363	8.14497	0.59046	0.982848
ecl8_01069	hyfB	Hydrogenase-4 component B	-0.102225	8.38093	0.579712	0.982818
ecl8_02791	dbpA	ATP-dependent RNA helicase DbpA	-0.102173	7.54372	0.640863	0.993292
ecl8_04517	iolI	Inosose isomerase	-0.101889	7.72845	0.666862	0.993292
ecl8_00501	kdsD	Arabinose 5-phosphate isomerase KdsD	-0.101486	7.9997	0.640725	0.993292
ecl8_01131	stpA	DNA-binding protein StpA	-0.101474	9.38112	0.579367	0.982818
ecl8_03843	fetA	putative iron export ATP-binding protein FetA	-0.101431	9.08316	0.582793	0.982818
ecl8_04445	blc_1	Outer membrane lipoprotein Blc	-0.100951	7.52289	0.678157	0.993292
ecl8_02236	dtpA	Dipeptide and tripeptide permease A	-0.10076	8.45408	0.58471	0.982818
ecl8_03992	sbmA	Peptide antibiotic transporter SbmA	-0.100106	8.73899	0.603424	0.986894
ecl8_02591	ecl8_02591	hypothetical protein	-0.100021	8.38725	0.612949	0.989453
ecl8_04234	leuO	HTH-type transcriptional regulator LeuO	-0.0998153	10.0844	0.630025	0.993292
ecl8_01016	ecl8_01016	hypothetical protein	-0.0993736	5.51483	0.823073	1
ecl8_01412	ecl8_01412	hypothetical protein	-0.0992016	6.74405	0.760121	0.999175
ecl8_01486	alaA	Glutamate-pyruvate aminotransferase AlaA	-0.0987485	8.32605	0.620486	0.991325
ecl8_00947	cobT_1	Nicotinate-nucleotide--dimethylbenzimidazole phosphoribosyltransferase	-0.0985449	7.14889	0.697303	0.993292
ecl8_00639	ureC_1	Urease subunit alpha	-0.0985318	8.36073	0.612138	0.989023
ecl8_03371	bglA_3	Aryl-phospho-beta-D-glucosidase BglA	-0.0984231	7.98265	0.664881	0.993292
ecl8_03988	ddlA	D-alanine--D-alanine ligase A	-0.0983527	7.8171	0.643204	0.993292
ecl8_05096	ecl8_05096	hypothetical protein	-0.0982694	7.58753	0.680099	0.993292
ecl8_04900	rffH	Glucose-1-phosphate thymidylyltransferase 2	-0.0982401	7.3163	0.713326	0.993292
ecl8_03388	ybiB	putative protein YbiB	-0.0982388	7.56264	0.652479	0.993292
ecl8_02384	zapE_2	Cell division protein ZapE	-0.0982088	6.77981	0.722013	0.993299
ecl8_03732	iolE_3	Inosose dehydratase	-0.0979244	7.47488	0.686477	0.993292
ecl8_05040	viaA	Protein ViaA	-0.0978914	8.31035	0.619181	0.991325
ecl8_00807	emrK_1	putative multidrug resistance protein EmrK	-0.0978812	8.75328	0.599153	0.985563
ecl8_02866	ureR	Urease operon transcriptional activator	-0.0978345	7.99656	0.637428	0.993292
ecl8_03276	artP	Arginine transport ATP-binding protein ArtP	-0.0978041	6.79695	0.736558	0.998161
ecl8_04998	ecl8_04998	hypothetical protein	-0.0975158	7.0453	0.720785	0.993299
ecl8_03204	ssuD	Alkanesulfonate monooxygenase	-0.0973392	7.15414	0.714719	0.993292
ecl8_00393	bfd	Bacterioferritin-associated ferredoxin	-0.0968243	7.4868	0.726055	0.99483
ecl8_03948	tsx	Nucleoside-specific channel-forming protein Tsx	-0.096708	7.50716	0.703139	0.993292
ecl8_03747	ecl8_03747	hypothetical protein	-0.0966065	6.59691	0.754451	0.999175
ecl8_01044	ilvI_1	Acetolactate synthase isozyme 3 large subunit	-0.0965458	8.78817	0.634595	0.993292
ecl8_02677	dcuR	Transcriptional regulatory protein DcuR	-0.0964472	6.81427	0.778766	0.999175
ecl8_02420	pucI	putative allantoin permease	-0.096393	7.47087	0.675929	0.993292
ecl8_02589	yddE	putative isomerase YddE	-0.0960344	6.7818	0.750478	0.999175
ecl8_04350	vdcA_2	Diguanylate cyclase VdcA	-0.0959601	10.6783	0.638916	0.993292
ecl8_03232	comEC	ComE operon protein 3	-0.0956185	8.24052	0.619799	0.991325
ecl8_00688	ecl8_00688	hypothetical protein	-0.095542	7.14906	0.692434	0.993292
ecl8_00951	mltA	Membrane-bound lytic murein transglycosylase A	-0.0951779	7.46643	0.717752	0.993292
ecl8_04317	creD	Inner membrane protein CreD	-0.0949407	8.22892	0.616931	0.991325
ecl8_04189	speD	S-adenosylmethionine decarboxylase proenzyme	-0.0949284	7.78547	0.642983	0.993292
ecl8_02531	map_1	Methionine aminopeptidase	-0.0947199	7.40185	0.685511	0.993292
ecl8_02497	ydjG	NADH-specific methylglyoxal reductase	-0.0945259	5.56942	0.84158	1
ecl8_03502	kdpA	Potassium-transporting ATPase potassium-binding subunit	-0.0944186	8.17852	0.613257	0.989604
ecl8_03382	ybiO	Moderate conductance mechanosensitive channel YbiO	-0.0943636	8.20432	0.622835	0.991327
ecl8_04024	phnE_1	Phosphate-import permease protein PhnE	-0.094317	6.87289	0.729485	0.995938
ecl8_03663	ybdK	Putative glutamate--cysteine ligase 2	-0.094299	7.57999	0.686535	0.993292
ecl8_01234	glrK	Sensor histidine kinase GlrK	-0.0939921	8.30656	0.606535	0.988117
ecl8_02843	ymcF	Protein YmcF	-0.0938923	6.8041	0.73129	0.997627
ecl8_01954	nasR	Nitrate regulatory protein	-0.0938357	6.87005	0.747177	0.998733
ecl8_00021	malP_1	PTS system maltose-specific EIICB component	-0.0934402	8.39338	0.611796	0.98899
ecl8_04060	gabT	4-aminobutyrate aminotransferase GabT	-0.0931305	7.84311	0.679827	0.993292
ecl8_02441	hpxW	Oxamate amidohydrolase proenzyme	-0.092733	7.74905	0.663677	0.993292
ecl8_04208	guaC	GMP reductase	-0.0926939	8.0037	0.662154	0.993292
ecl8_04090	ycgJ	putative methyltransferase YcgJ	-0.0926139	7.31085	0.70804	0.993292
ecl8_01521	glpT_1	Glycerol-3-phosphate transporter	-0.0925776	7.8958	0.664351	0.993292
ecl8_00565	yhaJ_1	HTH-type transcriptional regulator YhaJ	-0.0924598	7.75823	0.686939	0.993292
ecl8_04967	fieF_2	Ferrous-iron efflux pump FieF	-0.0923544	7.92888	0.66122	0.993292
ecl8_05240	ecl8_05240	hypothetical protein	-0.0920927	7.27121	0.703096	0.993292
ecl8_00610	dhaK_2	PEP-dependent dihydroxyacetone kinase, dihydroxyacetone-binding subunit DhaK	-0.0918106	7.64722	0.667785	0.993292
ecl8_03147	agp_1	Glucose-1-phosphatase	-0.0916792	7.50355	0.688016	0.993292
ecl8_01263	ecl8_01263	hypothetical protein	-0.0916776	7.10904	0.723724	0.993554
ecl8_03219	ecl8_03219	hypothetical protein	-0.0915663	7.39463	0.701669	0.993292
ecl8_04428	rbbA	Ribosome-associated ATPase	-0.0915071	8.85054	0.622798	0.991327
ecl8_05129	decR_2	DNA-binding transcriptional activator DecR	-0.0914916	6.97044	0.756368	0.999175
ecl8_02100	glnH_1	Glutamine-binding periplasmic protein	-0.0913784	6.436	0.792493	1
ecl8_01157	cbl_1	HTH-type transcriptional regulator cbl	-0.0911805	7.45834	0.702011	0.993292
ecl8_05020	yihG	putative acyltransferase YihG	-0.0900302	8.07459	0.678825	0.993292
ecl8_00305	ugpA_1	sn-glycerol-3-phosphate transport system permease protein UgpA	-0.089926	7.55792	0.702747	0.993292
ecl8_01911	bltD	Spermine/spermidine acetyltransferase	-0.0898506	6.80322	0.764658	0.999175
ecl8_02547	nepI_2	Purine ribonucleoside efflux pump NepI	-0.0898187	7.29104	0.709694	0.993292
ecl8_01778	sdiA	Regulatory protein SdiA	-0.0898094	8.82741	0.6285	0.993292
ecl8_01331	eutC_1	Ethanolamine ammonia-lyase light chain	-0.0896792	6.84103	0.765269	0.999175
ecl8_04057	csiD	Protein CsiD	-0.0895282	6.61464	0.771962	0.999175
ecl8_02428	ecl8_02428	hypothetical protein	-0.0895087	7.94697	0.649694	0.993292
ecl8_02031	ecl8_02031	hypothetical protein	-0.0894638	8.73553	0.630131	0.993292
ecl8_02604	metE_1	5-methyltetrahydropteroyltriglutamate-- homocysteine methyltransferase	-0.0894325	6.98375	0.739291	0.998161
ecl8_00851	mrkD_1	Fimbria adhesin protein	-0.0894222	7.74761	0.670315	0.993292
ecl8_03511	ybfE	putative protein YbfE	-0.0894039	5.69518	0.854658	1
ecl8_04942	argC	N-acetyl-gamma-glutamyl-phosphate reductase	-0.0893872	8.13735	0.657554	0.993292
ecl8_05030	pdhR_2	Pyruvate dehydrogenase complex repressor	-0.0893809	8.17324	0.642146	0.993292
ecl8_03353	gsiC_4	Glutathione transport system permease protein GsiC	-0.089198	7.04205	0.737662	0.998161
ecl8_02019	ecl8_02019	hypothetical protein	-0.0881752	7.46638	0.689943	0.993292
ecl8_01394	rdgC_1	Recombination-associated protein RdgC	-0.0881356	8.67997	0.631309	0.993292
ecl8_04425	lsrB_2	Autoinducer 2-binding protein LsrB	-0.0880012	9.31326	0.625297	0.992661
ecl8_01095	mntB_3	Manganese transport system membrane protein MntB	-0.0879261	7.37235	0.710022	0.993292
ecl8_03879	ptsG_2	PTS system glucose-specific EIICB component	-0.0878782	7.51652	0.722026	0.993299
ecl8_02643	speG_2	Spermidine N(1)-acetyltransferase	-0.0878623	6.65517	0.765784	0.999175
ecl8_02982	dinI_1	DNA damage-inducible protein I	-0.08778	5.9244	0.814819	1
ecl8_04605	ulaG	putative L-ascorbate-6-phosphate lactonase UlaG	-0.0877427	7.42359	0.702583	0.993292
ecl8_00882	galR_1	HTH-type transcriptional regulator GalR	-0.0876827	7.3881	0.703758	0.993292
ecl8_02127	ccmH_1	Cytochrome c-type biogenesis protein CcmH	-0.0875457	5.6435	0.842596	1
ecl8_02192	ecl8_02192	hypothetical protein	-0.0875031	7.80305	0.679062	0.993292
ecl8_01114	emrB_1	Multidrug export protein EmrB	-0.0872632	7.93624	0.71322	0.993292
ecl8_02469	fruA_2	PTS system fructose-specific EIIB'BC component	-0.0872579	9.15333	0.651088	0.993292
ecl8_01316	tal	Transaldolase	-0.0872537	7.13458	0.772622	0.999175
ecl8_00588	lsrK	Autoinducer-2 kinase	-0.0872124	7.83731	0.670977	0.993292
ecl8_03541	glnQ_6	Glutamine transport ATP-binding protein GlnQ	-0.0870921	8.2494	0.680079	0.993292
ecl8_00985	gudP_1	putative glucarate transporter	-0.0869347	8.51061	0.638454	0.993292
ecl8_03543	cdiA	tRNA nuclease CdiA	-0.0862098	10.3236	0.649529	0.993292
ecl8_02788	ecl8_02788	hypothetical protein	-0.085816	5.24738	0.858031	1
ecl8_01050	fhuC_1	Iron(3+)-hydroxamate import ATP-binding protein FhuC	-0.0855182	6.78956	0.775516	0.999175
ecl8_03126	phoH	Protein PhoH	-0.0854543	7.96754	0.68026	0.993292
ecl8_00763	bglA_1	6-phospho-beta-glucosidase BglA	-0.0853714	9.47719	0.634562	0.993292
ecl8_03996	ecl8_03996	hypothetical protein	-0.0851618	8.1903	0.680608	0.993292
ecl8_02443	fliY_5	L-cystine-binding protein FliY	-0.0850228	7.52116	0.709886	0.993292
ecl8_03073	hinT	Purine nucleoside phosphoramidase	-0.0849047	5.16867	0.869328	1
ecl8_02926	cedA	Cell division activator CedA	-0.0847442	5.13917	0.861796	1
ecl8_05039	ravA	ATPase RavA	-0.0842508	8.80998	0.642324	0.993292
ecl8_00250	treF	Cytoplasmic trehalase	-0.0841268	8.00718	0.670936	0.993292
ecl8_02108	hipO_1	Hippurate hydrolase	-0.0839195	6.76447	0.769436	0.999175
ecl8_02830	ecl8_02830	hypothetical protein	-0.0838304	7.65666	0.69556	0.993292
ecl8_01436	ecl8_01436	hypothetical protein	-0.0837018	7.92872	0.675748	0.993292
ecl8_00028	dsdC_1	HTH-type transcriptional regulator DsdC	-0.0835534	7.21754	0.778344	0.999175
ecl8_01191	ecl8_01191	hypothetical protein	-0.0828758	7.38658	0.74174	0.998161
ecl8_04406	rhtC_2	Threonine efflux protein	-0.0828305	7.23227	0.74195	0.998161
ecl8_02946	ecl8_02946	hypothetical protein	-0.0827697	6.52847	0.780422	0.999258
ecl8_03172	rep_1	ATP-dependent DNA helicase Rep	-0.0825747	8.28677	0.676681	0.993292
ecl8_03957	ahpC_2	Alkyl hydroperoxide reductase C	-0.0815651	9.11725	0.65722	0.993292
ecl8_04648	ecl8_04648	hypothetical protein	-0.0815173	9.92476	0.662684	0.993292
ecl8_00527	ecl8_00527	hypothetical protein	-0.0814263	10.6335	0.706345	0.993292
ecl8_00303	livF_1	High-affinity branched-chain amino acid transport ATP-binding protein LivF	-0.0813406	7.32211	0.764289	0.999175
ecl8_02535	fimD_3	Outer membrane usher protein FimD	-0.0812821	8.58341	0.691539	0.993292
ecl8_02592	marR_2	Multiple antibiotic resistance protein MarR	-0.0812306	7.63252	0.711389	0.993292
ecl8_03630	fabG_14	3-oxoacyl-[acyl-carrier-protein] reductase	-0.0811807	6.76842	0.77627	0.999175
ecl8_03921	cyoE	Protoheme IX farnesyltransferase	-0.0810374	6.35813	0.797201	1
ecl8_02033	ecl8_02033	hypothetical protein	-0.0810335	6.47613	0.798132	1
ecl8_01292	bglA_2	6-phospho-beta-glucosidase BglA	-0.0808936	7.8062	0.721538	0.993299
ecl8_00576	exuT_2	Hexuronate transporter	-0.0806884	8.17215	0.705669	0.993292
ecl8_02770	artM_2	Arginine transport ATP-binding protein ArtM	-0.0806304	8.6483	0.690966	0.993292
ecl8_02554	metN_2	Methionine import ATP-binding protein MetN	-0.0805893	6.56739	0.793622	1
ecl8_02699	uspE	Universal stress protein E	-0.0801433	6.65119	0.785086	0.999952
ecl8_02367	treS	Trehalose synthase/amylase TreS	-0.0801412	8.01626	0.681664	0.993292
ecl8_04446	mlrA	HTH-type transcriptional regulator MlrA	-0.0800619	7.93101	0.689448	0.993292
ecl8_03360	cutC_2	Choline trimethylamine-lyase	-0.0800321	8.46575	0.706359	0.993292
ecl8_04975	rhaS_2	HTH-type transcriptional activator RhaS	-0.0800209	7.72566	0.708544	0.993292
ecl8_02355	yheS_3	putative ABC transporter ATP-binding protein YheS	-0.0799999	8.23237	0.66298	0.993292
ecl8_00135	mutM	Formamidopyrimidine-DNA glycosylase	-0.0799256	8.02788	0.738494	0.998161
ecl8_02583	adh1_2	Long-chain-alcohol dehydrogenase 1	-0.0797689	7.29011	0.757738	0.999175
ecl8_00716	ecl8_00716	hypothetical protein	-0.0795472	6.30391	0.810216	1
ecl8_02219	nemA	N-ethylmaleimide reductase	-0.0795443	7.73959	0.705007	0.993292
ecl8_02111	ecl8_02111	hypothetical protein	-0.079197	9.03516	0.673543	0.993292
ecl8_02107	ycaD_1	putative MFS-type transporter YcaD	-0.0790599	8.0251	0.723627	0.993554
ecl8_02207	cfa	Cyclopropane-fatty-acyl-phospholipid synthase	-0.0790404	8.27875	0.693009	0.993292
ecl8_01151	cloR	4-hydroxy-3-prenylphenylpyruvate oxygenase/4-hydroxy-3-prenylbenzoate synthase	-0.0787258	7.32994	0.785133	0.999952
ecl8_00612	dhaR	PTS-dependent dihydroxyacetone kinase operon regulatory protein	-0.0787195	8.49036	0.675563	0.993292
ecl8_03268	poxB	Pyruvate dehydrogenase [ubiquinone]	-0.0787008	8.05238	0.718062	0.993292
ecl8_03432	uspG_2	Universal stress protein UP12	-0.078496	7.48715	0.78593	1
ecl8_00617	dhaB	Glycerol dehydratase large subunit	-0.078319	8.88729	0.683933	0.993292
ecl8_02451	dmlR_11	HTH-type transcriptional regulator DmlR	-0.0776281	6.22205	0.853113	1
ecl8_00281	yhhS_1	putative MFS-type transporter YhhS	-0.0775308	7.63628	0.729575	0.995938
ecl8_05090	soj_1	Chromosome-partitioning ATPase Soj	-0.0774669	7.71106	0.715929	0.993292
ecl8_00110	glpX	Fructose-1,6-bisphosphatase 1 class 2	-0.0773189	7.56608	0.746176	0.998733
ecl8_00944	cbiO_1	Cobalt import ATP-binding protein CbiO	-0.0772961	7.07534	0.769758	0.999175
ecl8_00221	dppC	Dipeptide transport system permease protein DppC	-0.077294	8.01718	0.704027	0.993292
ecl8_03135	rutR	HTH-type transcriptional regulator RutR	-0.0772532	6.32358	0.821122	1
ecl8_05125	ecl8_05125	hypothetical protein	-0.0771866	6.79734	0.793739	1
ecl8_01810	ecl8_01810	hypothetical protein	-0.0767799	7.23927	0.747533	0.998733
ecl8_05265	ecl8_05265	hypothetical protein	-0.0767516	5.99357	0.851319	1
ecl8_04878	yigB	5-amino-6-(5-phospho-D-ribitylamino)uracil phosphatase YigB	-0.0767003	7.37487	0.76368	0.999175
ecl8_00235	bcsQ_2	Cellulose biosynthesis protein BcsQ	-0.0764669	8.23221	0.734976	0.998161
ecl8_02139	budC	Diacetyl reductase [(S)-acetoin forming]	-0.0763875	6.89493	0.79001	1
ecl8_02730	cycA_1	D-serine/D-alanine/glycine transporter	-0.0763152	7.18427	0.756764	0.999175
ecl8_04369	sorB_2	PTS system sorbose-specific EIIB component	-0.0759319	6.81244	0.784925	0.999952
ecl8_04318	creC	Sensor protein CreC	-0.0754423	7.8813	0.718451	0.993292
ecl8_00011	dgoD	D-galactonate dehydratase	-0.0753984	10.3483	0.703899	0.993292
ecl8_03441	bluF_2	Blue light- and temperature-regulated antirepressor BluF	-0.0748946	9.38601	0.690753	0.993292
ecl8_03154	puuD	Gamma-glutamyl-gamma-aminobutyrate hydrolase PuuD	-0.0748795	7.10128	0.787905	1
ecl8_05147	iutA_2	Ferric aerobactin receptor	-0.0743481	8.76365	0.682513	0.993292
ecl8_00037	uhpB	Signal transduction histidine-protein kinase/phosphatase UhpB	-0.0742852	8.17846	0.714457	0.993292
ecl8_04553	ecl8_04553	hypothetical protein	-0.074219	6.83274	0.798069	1
ecl8_05246	ecl8_05246	hypothetical protein	-0.0737204	5.86705	0.870707	1
ecl8_02034	ecl8_02034	hypothetical protein	-0.0736272	6.93279	0.801406	1
ecl8_00526	ecl8_00526	hypothetical protein	-0.0736033	8.34928	0.716695	0.993292
ecl8_04017	ecpD	Fimbria adhesin EcpD	-0.0735996	8.34709	0.720079	0.993299
ecl8_01438	ecl8_01438	hypothetical protein	-0.0735936	7.85361	0.715358	0.993292
ecl8_01205	kgtP_1	Alpha-ketoglutarate permease	-0.0735119	7.52674	0.745285	0.998329
ecl8_04059	gabD_3	Succinate-semialdehyde dehydrogenase [NADP(+)] GabD	-0.0735073	7.06818	0.790671	1
ecl8_02444	tcyB	L-cystine transport system permease protein TcyB	-0.0734943	6.82364	0.782101	0.999478
ecl8_02116	ecl8_02116	Gluconate 2-dehydrogenase flavoprotein	-0.073492	8.28345	0.693995	0.993292
ecl8_03224	cmoM	tRNA 5-carboxymethoxyuridine methyltransferase	-0.0733784	6.53011	0.832303	1
ecl8_02704	ydgI	Putative arginine/ornithine antiporter	-0.0732651	7.4296	0.768849	0.999175
ecl8_00010	dgoA_1	2-dehydro-3-deoxy-6-phosphogalactonate aldolase	-0.07321	6.82938	0.787928	1
ecl8_04187	fkpA_2	FKBP-type peptidyl-prolyl cis-trans isomerase FkpA	-0.0729922	9.82973	0.68768	0.993292
ecl8_02574	ecl8_02574	hypothetical protein	-0.0728784	6.45764	0.815909	1
ecl8_02146	thlA_2	Acetyl-CoA acetyltransferase	-0.0728356	6.49257	0.827884	1
ecl8_01345	cysM	Cysteine synthase B	-0.0726566	5.85233	0.855714	1
ecl8_04754	ecl8_04754	hypothetical protein	-0.072587	6.59321	0.803759	1
ecl8_03963	nfdA_2	N-substituted formamide deformylase	-0.072502	8.27624	0.734432	0.998161
ecl8_01604	dld	Quinone-dependent D-lactate dehydrogenase	-0.0723712	8.12142	0.718281	0.993292
ecl8_03853	gsk	Inosine-guanosine kinase	-0.0721696	8.23633	0.700684	0.993292
ecl8_00502	yrbG	Inner membrane protein YrbG	-0.0721391	8.48385	0.732172	0.998001
ecl8_01419	ecl8_01419	hypothetical protein	-0.072094	6.56068	0.826232	1
ecl8_02624	rob_3	Right origin-binding protein	-0.0720313	8.5264	0.717921	0.993292
ecl8_02253	ecl8_02253	hypothetical protein	-0.0719833	6.6884	0.83481	1
ecl8_04757	dinF	DNA damage-inducible protein F	-0.0719437	8.579	0.704167	0.993292
ecl8_01076	symE	Toxic protein SymE	-0.0718079	6.62503	0.810258	1
ecl8_02634	ecl8_02634	hypothetical protein	-0.0717344	6.763	0.820549	1
ecl8_02374	osmC	Peroxiredoxin OsmC	-0.071505	6.22555	0.858231	1
ecl8_03667	ctpF_2	putative cation-transporting ATPase F	-0.0713162	9.06666	0.711777	0.993292
ecl8_03176	ecl8_03176	hypothetical protein	-0.0712931	8.01357	0.742697	0.998161
ecl8_02064	melA_1	Protein MelA	-0.0712332	5.23671	0.873029	1
ecl8_01927	ecl8_01927	hypothetical protein	-0.0710171	8.78803	0.737023	0.998161
ecl8_01113	leuA_1	2-isopropylmalate synthase	-0.071009	7.91811	0.729534	0.995938
ecl8_03597	ecl8_03597	hypothetical protein	-0.0708803	7.12902	0.777937	0.999175
ecl8_01298	bepA	Beta-barrel assembly-enhancing protease	-0.0707422	7.9707	0.728393	0.99576
ecl8_01286	pdeF	Cyclic di-GMP phosphodiesterase PdeF	-0.0707263	9.68821	0.729132	0.995938
ecl8_03131	ecl8_03131	hypothetical protein	-0.0704247	6.83165	0.799407	1
ecl8_00117	ecl8_00117	hypothetical protein	-0.0703678	8.3073	0.707744	0.993292
ecl8_04311	ecl8_04311	hypothetical protein	-0.0703044	8.11706	0.753094	0.999175
ecl8_01451	epmC	Elongation factor P hydroxylase	-0.0701682	6.23777	0.847909	1
ecl8_03621	dxs_2	1-deoxy-D-xylulose-5-phosphate synthase	-0.0701502	6.85598	0.792968	1
ecl8_04463	potB_2	Spermidine/putrescine transport system permease protein PotB	-0.0699933	7.78651	0.739927	0.998161
ecl8_00278	arnE	putative 4-amino-4-deoxy-L-arabinose-phosphoundecaprenol flippase subunit ArnE	-0.0698975	6.40045	0.845795	1
ecl8_05045	rsmG	Ribosomal RNA small subunit methyltransferase G	-0.0698586	8.73021	0.703955	0.993292
ecl8_05063	axe16A	Carbohydrate acetyl esterase/feruloyl esterase	-0.0697891	8.14609	0.71573	0.993292
ecl8_04938	sthA	Soluble pyridine nucleotide transhydrogenase	-0.0697204	7.35708	0.777499	0.999175
ecl8_00965	fucO	Lactaldehyde reductase	-0.0697044	7.61128	0.764595	0.999175
ecl8_03796	ecl8_03796	hypothetical protein	-0.0695691	6.93387	0.817164	1
ecl8_04630	artJ_3	ABC transporter arginine-binding protein 1	-0.0694744	7.1605	0.775126	0.999175
ecl8_01849	ribZ_2	Riboflavin transporter RibZ	-0.0694129	7.76229	0.736312	0.998161
ecl8_03203	ssuA_3	Putative aliphatic sulfonates-binding protein	-0.0694023	7.60229	0.768314	0.999175
ecl8_04572	ecl8_04572	hypothetical protein	-0.0693831	9.40371	0.719429	0.993292
ecl8_02242	rsxC	Electron transport complex subunit RsxC	-0.0693251	7.14464	0.781139	0.999258
ecl8_01595	oprB	Porin B	-0.0691062	9.34084	0.723652	0.993554
ecl8_04703	rbsB_4	Ribose import binding protein RbsB	-0.0689451	7.14409	0.780803	0.999258
ecl8_03389	dinG_2	putative ATP-dependent helicase DinG	-0.0688783	8.53324	0.743714	0.998161
ecl8_03510	ybfF	Esterase YbfF	-0.0688713	6.56452	0.824094	1
ecl8_02137	ecl8_02137	hypothetical protein	-0.0687805	6.37456	0.830758	1
ecl8_03064	comR	HTH-type transcriptional repressor ComR	-0.0681844	7.24287	0.777229	0.999175
ecl8_04457	xylA_2	Xylose isomerase	-0.0681738	9.99911	0.725071	0.994513
ecl8_00123	ecl8_00123	hypothetical protein	-0.0681544	7.501	0.775051	0.999175
ecl8_00433	topA_1	DNA topoisomerase 1	-0.0680856	6.80677	0.802669	1
ecl8_03927	ksdD	3-oxosteroid 1-dehydrogenase	-0.0679406	8.03227	0.747499	0.998733
ecl8_02035	ecl8_02035	hypothetical protein	-0.0679334	7.14298	0.781128	0.999258
ecl8_03500	phrB	Deoxyribodipyrimidine photo-lyase	-0.0678102	8.12825	0.744531	0.998161
ecl8_03821	ecl8_03821	hypothetical protein	-0.0677076	7.25373	0.783186	0.999687
ecl8_01708	cobT_2	Nicotinate-nucleotide--dimethylbenzimidazole phosphoribosyltransferase	-0.0676045	6.49475	0.825755	1
ecl8_02798	lrp_1	Leucine-responsive regulatory protein	-0.0672909	6.54863	0.828701	1
ecl8_01907	glnQ_1	Glutamine transport ATP-binding protein GlnQ	-0.0671893	7.31504	0.782099	0.999478
ecl8_03742	fimF_2	Protein FimF	-0.066889	8.81398	0.724034	0.993683
ecl8_04240	aroE_4	Shikimate dehydrogenase (NADP(+))	-0.0668163	7.83302	0.757714	0.999175
ecl8_01463	dedD	Cell division protein DedD	-0.0666173	5.4563	0.874681	1
ecl8_02910	ppsC_1	Phthiocerol/phenolphthiocerol synthesis polyketide synthase type I PpsC	-0.0662695	6.8592	0.81975	1
ecl8_04382	ecl8_04382	D-threonine aldolase	-0.0662493	7.30894	0.803878	1
ecl8_03311	ecl8_03311	hypothetical protein	-0.0660459	8.48501	0.731595	0.997627
ecl8_00828	cusC_1	Cation efflux system protein CusC	-0.0658991	8.04939	0.774631	0.999175
ecl8_04153	pulA	Pullulanase	-0.0658798	10.1141	0.749494	0.999175
ecl8_03395	perR_1	HTH-type transcriptional regulator PerR	-0.065826	8.8219	0.743094	0.998161
ecl8_02053	sufB	FeS cluster assembly protein SufB	-0.0656891	8.00499	0.744042	0.998161
ecl8_04814	thiC	Phosphomethylpyrimidine synthase	-0.0654663	9.30634	0.734501	0.998161
ecl8_04403	sad_2	Succinate semialdehyde dehydrogenase [NAD(P)+] Sad	-0.0652965	8.24967	0.72277	0.993554
ecl8_01134	ygaP	Inner membrane protein YgaP	-0.0651931	6.71632	0.823735	1
ecl8_02690	pcaR_2	Pca regulon regulatory protein	-0.0649518	7.11002	0.800941	1
ecl8_01327	mdh_2	NAD-dependent methanol dehydrogenase	-0.0647606	7.29417	0.791476	1
ecl8_02487	ygaU	putative protein YgaU	-0.0647346	7.19113	0.793444	1
ecl8_00662	ecl8_00662	hypothetical protein	-0.0645223	6.65712	0.848894	1
ecl8_01312	gltD_2	Glutamate synthase [NADPH] small chain	-0.0642092	8.35763	0.728578	0.99576
ecl8_01964	narX	Nitrate/nitrite sensor protein NarX	-0.0641807	8.04832	0.763741	0.999175
ecl8_03394	gudP_2	putative glucarate transporter	-0.0639096	8.91458	0.740311	0.998161
ecl8_01023	hokA_2	Protein HokA	-0.0634509	7.70705	0.759682	0.999175
ecl8_02578	ysnE	putative N-acetyltransferase YsnE	-0.0628373	5.90494	0.871752	1
ecl8_02283	potA_2	Spermidine/putrescine import ATP-binding protein PotA	-0.0625928	6.82624	0.831519	1
ecl8_02692	tsaR_3	HTH-type transcriptional regulator TsaR	-0.0625706	6.94312	0.81904	1
ecl8_00620	ddrA_1	Diol dehydratase-reactivating factor alpha subunit	-0.0623139	8.23237	0.758883	0.999175
ecl8_00165	lldR_1	Putative L-lactate dehydrogenase operon regulatory protein	-0.0618785	7.34901	0.796676	1
ecl8_00296	tyrP_1	Tyrosine-specific transport protein	-0.0616573	8.14805	0.756548	0.999175
ecl8_02268	tehB	Tellurite methyltransferase	-0.0610122	6.98893	0.821864	1
ecl8_00030	ecl8_00030	hypothetical protein	-0.0610071	7.78656	0.774207	0.999175
ecl8_02703	ydgH	Protein YdgH	-0.0607618	7.07237	0.820109	1
ecl8_02793	glpR_5	Glycerol-3-phosphate regulon repressor	-0.0607595	6.27084	0.855924	1
ecl8_01969	narI	Respiratory nitrate reductase 1 gamma chain	-0.0606801	5.72571	0.889546	1
ecl8_04780	rluF	23S rRNA pseudouridine(2604) synthase	-0.0605502	8.0585	0.798532	1
ecl8_00201	pcaK_2	4-hydroxybenzoate transporter PcaK	-0.0603761	8.36441	0.761982	0.999175
ecl8_02528	ecl8_02528	putative signaling protein	-0.0601475	8.54228	0.798775	1
ecl8_00035	ilvN	Acetolactate synthase isozyme 1 small subunit	-0.0601208	5.33985	0.882559	1
ecl8_04787	yggP	Mannitol-1-phosphate 5-dehydrogenase	-0.0598254	8.18601	0.791095	1
ecl8_04388	betB_2	NAD/NADP-dependent betaine aldehyde dehydrogenase	-0.0593668	7.39137	0.808224	1
ecl8_02243	rsxB	Electron transport complex subunit RsxB	-0.0592282	6.29778	0.862214	1
ecl8_01577	ecl8_01577	hypothetical protein	-0.0591407	7.2547	0.814377	1
ecl8_00275	arnA	Bifunctional polymyxin resistance protein ArnA	-0.0591226	8.48657	0.76159	0.999175
ecl8_01188	ecl8_01188	hypothetical protein	-0.0589299	7.29288	0.827272	1
ecl8_02209	yahB	putative HTH-type transcriptional regulator YahB	-0.0587213	7.12498	0.839292	1
ecl8_00816	ecl8_00816	hypothetical protein	-0.0585363	8.68844	0.75155	0.999175
ecl8_04667	ecl8_04667	hypothetical protein	-0.0584799	9.16348	0.752052	0.999175
ecl8_02417	ecl8_02417	hypothetical protein	-0.0583434	9.85359	0.766957	0.999175
ecl8_01080	hyfA_2	Hydrogenase-4 component A	-0.0582787	6.05825	0.892548	1
ecl8_04042	ybgJ_2	putative protein YbgJ	-0.0581068	6.95234	0.833606	1
ecl8_03119	rocF	Arginase	-0.0580964	8.40999	0.755085	0.999175
ecl8_04169	sfsA	Sugar fermentation stimulation protein A	-0.0580904	9.29312	0.803527	1
ecl8_00286	ecl8_00286	hypothetical protein	-0.0580737	7.56274	0.809436	1
ecl8_02411	ntdC	Glucose-6-phosphate 3-dehydrogenase	-0.0578519	7.11428	0.825858	1
ecl8_01058	scrY_1	Sucrose porin	-0.0577574	7.78637	0.778845	0.999175
ecl8_02144	ecl8_02144	hypothetical protein	-0.0577282	7.24115	0.815221	1
ecl8_04600	ulaE	L-ribulose-5-phosphate 3-epimerase UlaE	-0.0576844	7.57589	0.804769	1
ecl8_03627	rbsA_1	Ribose import ATP-binding protein RbsA	-0.0576511	8.21612	0.787408	1
ecl8_03591	suhB_2	Inositol-1-monophosphatase	-0.0576489	6.67744	0.855122	1
ecl8_05268	tus_2	DNA replication terminus site-binding protein	-0.0571795	8.33847	0.756567	0.999175
ecl8_05152	ecl8_05152	hypothetical protein	-0.056878	7.66476	0.786825	1
ecl8_04357	pobA	p-hydroxybenzoate hydroxylase	-0.0564707	7.85487	0.779532	0.999258
ecl8_02584	dapA_3	4-hydroxy-tetrahydrodipicolinate synthase	-0.0561354	7.86667	0.777315	0.999175
ecl8_03735	dtpC	Dipeptide and tripeptide permease C	-0.0560547	7.55219	0.80474	1
ecl8_04684	melA_2	Alpha-galactosidase	-0.0560318	7.95744	0.802919	1
ecl8_00866	cscB	Sucrose permease	-0.0560186	8.31689	0.763873	0.999175
ecl8_02944	ydjZ_1	TVP38/TMEM64 family inner membrane protein YdjZ	-0.0559802	6.41236	0.865974	1
ecl8_03433	ecl8_03433	hypothetical protein	-0.055855	7.18345	0.843714	1
ecl8_04690	phnG	Alpha-D-ribose 1-methylphosphonate 5-triphosphate synthase subunit PhnG	-0.0558472	6.69833	0.850824	1
ecl8_03605	cstA	Peptide transporter CstA	-0.0557169	7.80123	0.795962	1
ecl8_02863	pspF	Psp operon transcriptional activator	-0.0557103	6.71925	0.848842	1
ecl8_00179	xylR	Xylose operon regulatory protein	-0.0554985	8.26057	0.766569	0.999175
ecl8_03750	hiuH	5-hydroxyisourate hydrolase	-0.0554568	7.93281	0.791875	1
ecl8_03072	ecl8_03072	hypothetical protein	-0.0554277	5.39651	0.91225	1
ecl8_01252	trmJ	tRNA (cytidine/uridine-2'-O-)-methyltransferase TrmJ	-0.0552731	7.16601	0.834973	1
ecl8_01893	ecl8_01893	hypothetical protein	-0.0547685	6.90956	0.839041	1
ecl8_03779	ecl8_03779	hypothetical protein	-0.0547501	9.49067	0.76183	0.999175
ecl8_03814	kilR	Killing protein KilR	-0.0546106	7.5256	0.815362	1
ecl8_00426	mscL	Large-conductance mechanosensitive channel	-0.0542686	9.69877	0.763305	0.999175
ecl8_00798	ureF_2	Urease accessory protein UreF	-0.0540687	9.02438	0.769496	0.999175
ecl8_05098	ecl8_05098	hypothetical protein	-0.0538354	7.33278	0.83245	1
ecl8_02599	cbiO_2	Cobalt import ATP-binding protein CbiO	-0.0538327	6.15625	0.883383	1
ecl8_03149	fabG_11	3-oxoacyl-[acyl-carrier-protein] reductase FabG	-0.0537638	7.54412	0.851032	1
ecl8_03702	ecl8_03702	hypothetical protein	-0.053691	7.02938	0.843274	1
ecl8_00477	zapE_1	Cell division protein ZapE	-0.05369	8.08797	0.779091	0.999175
ecl8_01083	norW	Nitric oxide reductase FlRd-NAD(+) reductase	-0.0533241	7.15024	0.861303	1
ecl8_04359	ecl8_04359	hypothetical protein	-0.053234	6.59564	0.871038	1
ecl8_04011	ecl8_04011	hypothetical protein	-0.0531694	5.26341	0.898576	1
ecl8_02747	ecl8_02747	hypothetical protein	-0.0526493	6.08116	0.915749	1
ecl8_03959	ecl8_03959	hypothetical protein	-0.0525939	6.45028	0.870689	1
ecl8_03163	yeaX_2	Carnitine monooxygenase reductase subunit	-0.0523134	7.43278	0.829245	1
ecl8_04140	dgt	Deoxyguanosinetriphosphate triphosphohydrolase	-0.051946	9.96503	0.796349	1
ecl8_02960	sppA_1	Protease 4	-0.0519348	8.23369	0.809606	1
ecl8_00104	cdh	CDP-diacylglycerol pyrophosphatase	-0.0518441	7.03781	0.844351	1
ecl8_00710	nupG_1	Nucleoside permease NupG	-0.0518197	7.01595	0.86426	1
ecl8_01874	minD	Septum site-determining protein MinD	-0.05175	6.47131	0.871387	1
ecl8_02318	malK_1	Maltose/maltodextrin import ATP-binding protein MalK	-0.0515586	6.3315	0.901907	1
ecl8_03707	moaF	Protein MoaF	-0.0513134	7.0332	0.843402	1
ecl8_03736	cadA_1	Inducible lysine decarboxylase	-0.0512068	9.20558	0.792539	1
ecl8_02183	gsiD_1	Glutathione transport system permease protein GsiD	-0.0511565	6.87941	0.88535	1
ecl8_01150	ghrA_1	Glyoxylate/hydroxypyruvate reductase A	-0.0511418	7.06353	0.84663	1
ecl8_04584	cpdB	2',3'-cyclic-nucleotide 2'-phosphodiesterase/3'-nucleotidase	-0.0511085	8.30584	0.788552	1
ecl8_02388	ipuF	Gamma-glutamyl-L-1-hydroxyisopropylamide hydrolase	-0.0509104	6.5128	0.874492	1
ecl8_00836	fimG	Protein FimG	-0.0508484	7.59689	0.832677	1
ecl8_01769	ecl8_01769	hypothetical protein	-0.0503135	6.85609	0.880181	1
ecl8_03731	iolG_2	Myo-inositol 2-dehydrogenase	-0.0500552	7.35996	0.844326	1
ecl8_00451	yhdT	putative membrane protein YhdT	-0.0500045	5.56983	0.911665	1
ecl8_00048	phnT	Putative 2-aminoethylphosphonate import ATP-binding protein PhnT	-0.0499609	7.70346	0.818144	1
ecl8_02203	yvdD	LOG family protein YvdD	-0.0499318	6.57677	0.872982	1
ecl8_01967	narH	Respiratory nitrate reductase 1 beta chain	-0.0497029	7.18865	0.856217	1
ecl8_04058	lhgO	L-2-hydroxyglutarate oxidase LhgO	-0.0496133	7.51974	0.83221	1
ecl8_03583	ydjH	putative sugar kinase YdjH	-0.0495685	6.65221	0.875444	1
ecl8_03116	ycdX	putative phosphatase YcdX	-0.049318	7.05396	0.85051	1
ecl8_03321	ecl8_03321	hypothetical protein	-0.0490263	8.21749	0.822963	1
ecl8_00271	allS_1	HTH-type transcriptional activator AllS	-0.0488511	8.20772	0.820352	1
ecl8_00052	chbA_1	PTS system N,N'-diacetylchitobiose-specific EIIA component	-0.0488278	7.82535	0.83983	1
ecl8_03308	ecl8_03308	hypothetical protein	-0.0487296	6.34344	0.896733	1
ecl8_03708	iolS_4	Aldo-keto reductase IolS	-0.0487288	7.43361	0.837963	1
ecl8_04436	ecl8_04436	hypothetical protein	-0.0480731	8.16071	0.812717	1
ecl8_03340	ybjJ	Inner membrane protein YbjJ	-0.0478992	7.91906	0.842799	1
ecl8_04484	ecl8_04484	hypothetical protein	-0.0477334	9.1259	0.813424	1
ecl8_03211	sdaC_2	Serine transporter	-0.0475949	7.95715	0.824216	1
ecl8_02543	hpxO	FAD-dependent urate hydroxylase	-0.0475692	7.0808	0.84931	1
ecl8_00874	ygeA	Putative racemase YgeA	-0.0475383	7.88165	0.831939	1
ecl8_04429	yhhJ	Inner membrane transport permease YhhJ	-0.0474067	8.31937	0.798607	1
ecl8_02897	btuR	Cob(I)yrinic acid a,c-diamide adenosyltransferase	-0.0473224	6.49298	0.914897	1
ecl8_04922	ilvG	Acetolactate synthase isozyme 2 large subunit	-0.0472018	9.23842	0.798618	1
ecl8_04914	ppiC_1	Peptidyl-prolyl cis-trans isomerase C	-0.0471013	6.68299	0.866437	1
ecl8_01728	ecl8_01728	hypothetical protein	-0.0469652	5.95712	0.926305	1
ecl8_03866	acrR_2	HTH-type transcriptional regulator AcrR	-0.0469022	6.95024	0.87235	1
ecl8_02167	ribY	Riboflavin-binding protein RibY	-0.0467565	7.25405	0.853633	1
ecl8_05070	mdtL	Multidrug resistance protein MdtL	-0.04663	8.69583	0.803201	1
ecl8_02803	metQ_4	putative D-methionine-binding lipoprotein MetQ	-0.0464594	8.99198	0.839277	1
ecl8_04952	ecl8_04952	hypothetical protein	-0.0463352	6.68275	0.880091	1
ecl8_04156	epsE_1	Type II secretion system protein E	-0.0461618	8.20439	0.8258	1
ecl8_00349	mrcA	Penicillin-binding protein 1A	-0.0460672	9.47862	0.803	1
ecl8_04232	ilvH	Acetolactate synthase isozyme 3 small subunit	-0.0460039	7.10157	0.855853	1
ecl8_01518	glpC	Anaerobic glycerol-3-phosphate dehydrogenase subunit C	-0.0458799	7.10807	0.873728	1
ecl8_02110	hcxB	Hydroxycarboxylate dehydrogenase B	-0.0457707	7.29158	0.854638	1
ecl8_04502	dauA_2	C4-dicarboxylic acid transporter DauA	-0.0455557	8.00399	0.841426	1
ecl8_01626	csbX_1	Alpha-ketoglutarate permease	-0.0454694	7.71052	0.836955	1
ecl8_04258	rluA_2	Ribosomal large subunit pseudouridine synthase A	-0.0453912	7.04141	0.862087	1
ecl8_05131	pifC	Transcriptional repressor PifC	-0.0451835	7.40779	0.861537	1
ecl8_01700	ecl8_01700	hypothetical protein	-0.0447462	5.34611	0.916569	1
ecl8_04687	ecl8_04687	hypothetical protein	-0.0444722	8.61856	0.816092	1
[truncated: 2,601 more rows]
