# Supplementary material for: Transposon mutagenesis screen in Klebsiella pneumoniae identifies genetic determinants required for growth in human urine and serum
Source: eLife. 2024 Aug 27;12:RP88971. doi: 10.7554/eLife.88971 (PMC11349299; doi:10.7554/eLife.88971)
Supplement: Figure 6—source data 1. [file elife-88971-fig6-data1.xlsx]

## Sheet: Table S5_ECL8_Serum_Resistome
Figure 6-source data 1: List of LogFC sequence read values of ECL8 genes exposed, relative to heat-inactivated (control)
locus_tag	gene_name	function	logFC	logCPM	PValue	q.value
ecl8_04473	epsE_3	Putative glycosyltransferase EpsE	-15.0915	10.0094	1.94e-79	8.65e-76
ecl8_01682	rfbD	UDP-galactopyranose mutase	-13.6686	8.58838	2.33e-46	5.19e-43
ecl8_01681	gspA	General stress protein A	-13.3159	8.2364	1.68e-42	2.5e-39
ecl8_01683	ecl8_01683	hypothetical protein	-12.5788	7.50173	3.82e-25	3.41e-22
ecl8_01680	tagH	Teichoic acids export ATP-binding protein TagH	-12.507	7.43017	5.05e-22	3.75e-19
ecl8_05220	ecl8_05220	hypothetical protein	-12.3069	7.23101	1.39e-17	8.83e-15
ecl8_04853	rfaH	Transcription antitermination protein RfaH	-11.3845	6.31531	1.49e-07	3.33e-06
ecl8_00681	exbB	Biopolymer transport protein ExbB	-11.2078	6.14055	1.1e-06	1.74e-05
ecl8_05061	phoU	Phosphate-specific transport system accessory protein PhoU	-11.0837	6.0181	5.16e-06	6.34e-05
ecl8_01548	yejM	Inner membrane protein YejM	-11.0832	6.01713	4.19e-06	5.35e-05
ecl8_02494	tas_2	Protein tas	-10.7895	5.72771	2.17e-05	0.000212603
ecl8_03489	sdhC	Succinate dehydrogenase cytochrome b556 subunit	-10.3881	5.332	8.44e-05	0.000662949
ecl8_05224	hyuC_2	N-carbamoyl-L-amino-acid hydrolase	-10.3516	5.29658	8.06e-05	0.000641698
ecl8_04881	dapF	Diaminopimelate epimerase	-10.3479	5.29275	8.85e-05	0.000688951
ecl8_03300	ecl8_03300	hypothetical protein	-10.2816	5.22789	0.000105031	0.000791281
ecl8_01268	ndk	Nucleoside diphosphate kinase	-10.0035	4.95665	0.000175914	0.0012151
ecl8_03562	crcB_3	Putative fluoride ion transporter CrcB	-9.95407	4.90817	0.000197827	0.00135116
ecl8_03490	gltA_1	Citrate synthase	-9.94984	7.0698	1.69e-15	5.8e-13
ecl8_02526	ecl8_02526	hypothetical protein	-9.94588	4.90053	0.000199107	0.00135369
ecl8_03521	nagA	N-acetylglucosamine-6-phosphate deacetylase	-9.83295	4.79023	0.000251085	0.00162061
ecl8_00144	epsJ_2	putative glycosyltransferase EpsJ	-9.83086	7.81019	8.88e-29	9.9e-26
ecl8_04636	epmA	Elongation factor P--(R)-beta-lysine ligase	-9.79206	4.75072	0.000260071	0.00167233
ecl8_04215	lpxC	UDP-3-O-acyl-N-acetylglucosamine deacetylase	-9.73019	4.69151	0.000268036	0.00171023
ecl8_00451	yhdT	putative membrane protein YhdT	-9.70825	4.66984	0.00028096	0.00178502
ecl8_03801	ecl8_03801	hypothetical protein	-9.69078	4.65187	0.000307161	0.00191332
ecl8_00682	exbD	Biopolymer transport protein ExbD	-9.59168	4.55553	0.000386519	0.00232015
ecl8_00801	ureB_2	Urease subunit beta	-9.57057	4.53622	0.000347952	0.00212293
ecl8_01389	ecl8_01389	hypothetical protein	-9.56358	4.53027	0.000359141	0.00218522
ecl8_01408	ecl8_01408	hypothetical protein	-9.50274	4.47111	0.000389122	0.00233264
ecl8_04924	ecl8_04924	hypothetical protein	-9.49133	4.45975	0.000392581	0.00235022
ecl8_05223	ecl8_05223	hypothetical protein	-9.4508	4.41988	0.000446323	0.00261577
ecl8_01440	mlaA	putative phospholipid-binding lipoprotein MlaA	-9.40374	6.51885	2.33e-08	7.65e-07
ecl8_03316	ecl8_03316	hypothetical protein	-9.32463	4.29844	0.000579411	0.00324645
ecl8_04905	wecA	Undecaprenyl-phosphate alpha-N-acetylglucosaminyl 1-phosphate transferase	-9.2834	6.44966	1.28e-07	3e-06
ecl8_04972	sodA	Superoxide dismutase [Mn]	-9.22364	6.3918	3.72e-07	7.09e-06
ecl8_03513	fur	Ferric uptake regulation protein	-8.96308	3.95441	0.000900543	0.00472533
ecl8_03017	ecl8_03017	hypothetical protein	-8.95905	3.95089	0.00090788	0.0047581
ecl8_00433	topA_1	DNA topoisomerase 1	-8.94619	6.12196	5.94e-06	7.1e-05
ecl8_03775	ecl8_03775	hypothetical protein	-8.83626	5.94915	2.1e-05	0.000206817
ecl8_03522	nagC_2	N-acetylglucosamine repressor	-8.75479	6.76303	5.44e-10	3.71e-08
ecl8_03486	sdhB	Succinate dehydrogenase iron-sulfur subunit	-8.3517	5.46847	0.000182098	0.0012514
ecl8_02506	ecl8_02506	hypothetical protein	-8.31926	5.43795	0.00016827	0.00117085
ecl8_03313	ecl8_03313	hypothetical protein	-8.10672	5.2282	0.000325176	0.00200316
ecl8_01403	ecl8_01403	hypothetical protein	-8.0145	5.99951	3.13e-05	0.000289821
ecl8_04476	ecl8_04476	hypothetical protein	-7.80095	4.92931	0.000626406	0.0034835
ecl8_01390	ecl8_01390	hypothetical protein	-7.74758	4.95596	0.000576938	0.00324074
ecl8_01401	ecl8_01401	hypothetical protein	-7.7136	4.84652	0.000649741	0.00359175
ecl8_01759	mtfA	Protein MtfA	-7.62905	6.45473	1.66e-06	2.45e-05
ecl8_04646	epmB	L-lysine 2,3-aminomutase	-7.55782	6.48158	6.26e-07	1.1e-05
ecl8_01679	tagG	Teichoic acid translocation permease protein TagG	-7.55212	5.54473	0.000222643	0.00147547
ecl8_00713	yggX	putative Fe(2+)-trafficking protein	-7.5058	4.64591	0.000957431	0.00500016
ecl8_04093	dmlR_17	HTH-type transcriptional regulator DmlR	-7.40391	4.54643	0.000968135	0.00504426
ecl8_04851	fre	NAD(P)H-flavin reductase	-7.35189	7.20785	3.49e-14	9.72e-12
ecl8_00362	nirD	Nitrite reductase (NADH) small subunit	-7.16794	4.31936	0.00153467	0.00743175
ecl8_03480	cydB_3	Cytochrome bd-I ubiquinol oxidase subunit 2	-7.14274	5.59182	0.000368305	0.00222705
ecl8_01488	ndhC	NAD(P)H-quinone oxidoreductase subunit 3	-7.13785	5.58738	0.000349006	0.00212646
ecl8_01684	pglA	N, N'-diacetylbacillosaminyl-diphospho-undecaprenol alpha-1,3-N-acetylgalactosaminyltransferase	-7.09777	6.83178	6.15e-08	1.6e-06
ecl8_03995	hemB_1	Delta-aminolevulinic acid dehydratase	-7.02304	4.18172	0.00184575	0.00876685
ecl8_01474	folX	Dihydroneopterin triphosphate 2'-epimerase	-7.01851	5.02507	0.000675215	0.00371327
ecl8_03482	sucD	Succinate--CoA ligase [ADP-forming] subunit alpha	-7.01471	5.99357	0.000247831	0.00161126
ecl8_05059	pstA	Phosphate transport system permease protein PstA	-6.99901	5.59358	0.000621545	0.00346511
ecl8_00368	yhfG	putative protein YhfG	-6.98412	4.14423	0.00200235	0.00933174
ecl8_03272	amiD	N-acetylmuramoyl-L-alanine amidase AmiD	-6.90429	4.8564	0.00144585	0.00705525
ecl8_01987	oppF_3	Oligopeptide transport ATP-binding protein OppF	-6.72307	5.8467	0.000477612	0.00276643
ecl8_03018	cmtR	HTH-type transcriptional regulator CmtR	-6.65556	4.61721	0.00197481	0.00923234
ecl8_01196	raiA	Ribosome-associated inhibitor A	-6.59682	6.08385	0.000101466	0.000767016
ecl8_03061	mfd	Transcription-repair-coupling factor	-6.57201	6.75235	2.98e-08	8.98e-07
ecl8_00789	ecl8_00789	hypothetical protein	-6.54826	5.38062	0.00120181	0.00602934
ecl8_02458	fadR_2	Fatty acid metabolism regulator protein	-6.4252	4.39676	0.00296854	0.0130312
ecl8_00447	fis	DNA-binding protein Fis	-6.31904	4.35498	0.00225502	0.0103365
ecl8_01840	ecl8_01840	hypothetical protein	-6.3075	4.28474	0.00355954	0.0151309
ecl8_04773	ridA_2	2-iminobutanoate/2-iminopropanoate deaminase	-6.29438	6.06304	0.000751774	0.00406414
ecl8_03454	galE	UDP-glucose 4-epimerase	-6.28984	5.52593	0.000695442	0.00381041
ecl8_04647	ecl8_04647	hypothetical protein	-6.27786	5.40812	0.00228425	0.0104597
ecl8_03253	cydD	ATP-binding/permease protein CydD	-6.19026	5.03303	0.0023414	0.0107104
ecl8_00145	rfaL	O-antigen ligase	-6.16745	8.08545	1.42e-09	7.51e-08
ecl8_01835	yebZ	Inner membrane protein YebZ	-6.15929	5.53695	0.00195035	0.00914675
ecl8_01397	ecl8_01397	hypothetical protein	-6.15703	6.67597	3.88e-07	7.3e-06
ecl8_03672	bm3R1	HTH-type transcriptional repressor Bm3R1	-6.15249	4.13691	0.00437441	0.0179154
ecl8_01345	cysM	Cysteine synthase B	-6.14427	5.15284	0.00310698	0.0135456
ecl8_03483	sucC	Succinate--CoA ligase [ADP-forming] subunit beta	-6.11132	6.51416	8.73e-05	0.000681073
ecl8_01218	rseA	Anti-sigma-E factor RseA	-6.09808	4.72317	0.00354483	0.0151147
ecl8_02006	pfkB	ATP-dependent 6-phosphofructokinase isozyme 2	-6.08244	5.90203	0.000364282	0.0022091
ecl8_03783	ecl8_03783	hypothetical protein	-5.94747	4.8431	0.00161847	0.00778681
ecl8_01167	ecl8_01167	hypothetical protein	-5.93283	4.78541	0.00355454	0.0151271
ecl8_02188	glpR_3	Glycerol-3-phosphate regulon repressor	-5.82093	5.5949	0.00352304	0.0150361
ecl8_04063	crl	Sigma factor-binding protein Crl	-5.8203	4.67885	0.00385826	0.0162338
ecl8_04477	ecl8_04477	hypothetical protein	-5.80232	6.40391	5.87e-05	0.000493616
ecl8_03793	ecl8_03793	hypothetical protein	-5.74223	6.28908	0.000703596	0.00384093
ecl8_00517	greA	Transcription elongation factor GreA	-5.71593	4.74108	0.00588293	0.0228752
ecl8_03954	tgt	Queuine tRNA-ribosyltransferase	-5.67592	5.50756	0.00141201	0.00692042
ecl8_04832	tufA_2	Elongation factor Tu 1	-5.61373	5.55388	0.00415624	0.0172435
ecl8_01366	ecl8_01366	hypothetical protein	-5.50898	4.54417	0.00801233	0.0295539
ecl8_04939	oxyR_6	Hydrogen peroxide-inducible genes activator	-5.50438	6.03897	0.000399928	0.00239099
ecl8_03906	fadM	Long-chain acyl-CoA thioesterase FadM	-5.44463	5.33335	0.00203261	0.0094487
ecl8_02485	tenA_2	Aminopyrimidine aminohydrolase	-5.44223	4.97011	0.00405194	0.0168854
ecl8_00712	mltC	Membrane-bound lytic murein transglycosylase C	-5.44098	7.25908	9.92e-11	9.83e-09
ecl8_02216	grxD	Glutaredoxin 4	-5.38286	4.0487	0.00959865	0.0343304
ecl8_01176	bamE_1	Outer membrane protein assembly factor BamE	-5.33847	5.14343	0.00874889	0.0317753
ecl8_03796	ecl8_03796	hypothetical protein	-5.31264	5.46705	0.00864202	0.0314897
ecl8_02475	tolA_1	Protein TolA	-5.311	5.28822	0.00435216	0.0178459
ecl8_03338	ecl8_03338	hypothetical protein	-5.27827	4.52325	0.00366139	0.0154785
ecl8_01990	clsA	Cardiolipin synthase A	-5.25098	6.38972	0.000622979	0.00346877
ecl8_01789	ecl8_01789	hypothetical protein	-5.2265	5.12471	0.00301756	0.0131944
ecl8_05219	zur_2	Zinc uptake regulation protein	-5.18763	7.01499	3.76e-06	4.84e-05
ecl8_04921	ilvM	Acetolactate synthase isozyme 2 small subunit	-5.12912	5.36155	0.0102135	0.0359245
ecl8_03190	ompA	Outer membrane protein A	-5.129	4.75272	0.0122808	0.0415258
ecl8_00746	argP	HTH-type transcriptional regulator ArgP	-5.12415	6.26692	0.00115824	0.00585684
ecl8_05017	yihI	Der GTPase-activating protein YihI	-5.1025	6.36083	0.00239754	0.0109335
ecl8_03445	pgl_1	6-phosphogluconolactonase	-5.07884	5.64431	0.00884642	0.0320252
ecl8_02888	pgpB	Phosphatidylglycerophosphatase B	-5.0787	4.96011	0.00428927	0.0176315
ecl8_03115	ycdY	Chaperone protein YcdY	-5.04751	5.01179	0.011959	0.0406223
ecl8_01399	rusA	Crossover junction endodeoxyribonuclease RusA	-5.04538	5.5293	0.0055542	0.0217869
ecl8_00448	dus	putative tRNA-dihydrouridine synthase	-4.99281	6.00247	0.00122419	0.00612139
ecl8_00129	slmA	Nucleoid occlusion factor SlmA	-4.98457	6.11873	0.00578932	0.0226098
ecl8_04897	wzxE	Lipid III flippase	-4.96015	6.86469	0.00012328	0.000902295
ecl8_01206	ecl8_01206	hypothetical protein	-4.94833	4.38004	0.0145804	0.0480626
ecl8_03312	ecl8_03312	hypothetical protein	-4.87993	4.68112	0.0104552	0.0366014
ecl8_00536	pnp	Polyribonucleotide nucleotidyltransferase	-4.8483	5.52151	0.00325162	0.0140798
ecl8_03872	ylaC	Inner membrane protein YlaC	-4.83017	4.70035	0.00747824	0.0279104
ecl8_03324	ecl8_03324	hypothetical protein	-4.79061	4.92724	0.00764863	0.0284037
ecl8_01015	rpoS	RNA polymerase sigma factor RpoS	-4.75287	5.14028	0.00595931	0.0231319
ecl8_00435	aroE_1	Shikimate dehydrogenase (NADP(+))	-4.74128	6.83825	0.000226289	0.00149297
ecl8_02244	rsxA	Electron transport complex subunit RsxA	-4.68864	5.73535	0.00492595	0.0197392
ecl8_04901	rffG	dTDP-glucose 4,6-dehydratase 2	-4.66302	6.62117	0.000121066	0.000891015
ecl8_04654	cvaA	Colicin V secretion protein CvaA	-4.63641	5.12248	0.0217	0.0666083
ecl8_01467	argT	Lysine/arginine/ornithine-binding periplasmic protein	-4.63621	6.13792	0.00963212	0.0344225
ecl8_03508	pgm	Phosphoglucomutase	-4.62212	4.63692	0.0129663	0.0434809
ecl8_02255	frmR	Transcriptional repressor FrmR	-4.61458	4.07111	0.0218561	0.0669242
ecl8_04900	rffH	Glucose-1-phosphate thymidylyltransferase 2	-4.57716	6.92686	1.6e-05	0.000162798
ecl8_00574	yqjA	Inner membrane protein YqjA	-4.54962	5.64835	0.0114974	0.0393842
ecl8_05221	ecl8_05221	hypothetical protein	-4.53759	6.51657	0.00453205	0.0184029
ecl8_02136	ecl8_02136	hypothetical protein	-4.52174	4.51852	0.0226221	0.0688701
ecl8_02478	opd	Parathion hydrolase	-4.50982	5.28786	0.0234642	0.0709976
ecl8_02491	dctD	C4-dicarboxylate transport transcriptional regulatory protein DctD	-4.46165	5.97115	0.0184412	0.0582905
ecl8_04102	metN_4	Methionine import ATP-binding protein MetN	-4.41115	7.93891	1.78e-08	6.39e-07
ecl8_04779	ecl8_04779	hypothetical protein	-4.3675	5.32357	0.0112806	0.0387607
ecl8_04925	gltC_8	HTH-type transcriptional regulator GltC	-4.36356	7.39746	2.62e-09	1.23e-07
ecl8_04092	ydhP_2	Inner membrane transport protein YdhP	-4.34345	6.58873	0.00246414	0.0111915
ecl8_02496	ecl8_02496	Lactonase drp35	-4.32159	5.19624	0.0347466	0.0980821
ecl8_04601	ulaD	3-keto-L-gulonate-6-phosphate decarboxylase UlaD	-4.29003	5.96714	0.0136647	0.0453457
ecl8_03534	ybeZ	PhoH-like protein	-4.27668	4.61732	0.0234291	0.0709877
ecl8_04299	nhaA	Na(+)/H(+) antiporter NhaA	-4.27549	7.12722	3.37e-05	0.000310754
ecl8_04172	pcnB	Poly(A) polymerase I	-4.25994	5.08602	0.0149332	0.0489361
ecl8_00710	nupG_1	Nucleoside permease NupG	-4.25036	6.3618	0.0147789	0.0485733
ecl8_03766	ecl8_03766	hypothetical protein	-4.17789	4.40547	0.039424	0.108874
ecl8_05021	dsbA_2	Thiol:disulfide interchange protein DsbA	-4.15459	6.02593	0.00586169	0.0228203
ecl8_00325	glpE_1	Thiosulfate sulfurtransferase GlpE	-4.11838	5.88739	0.0304762	0.0883197
ecl8_04923	comM	Competence protein ComM	-4.11215	7.78866	0.000322391	0.00198875
ecl8_02501	pgrR_6	HTH-type transcriptional regulator PgrR	-4.10745	6.99328	8.42e-06	9.49e-05
ecl8_01529	atoE	Putative short-chain fatty acid transporter	-4.10522	6.04615	0.00679006	0.0257953
ecl8_04766	malE	Maltose-binding periplasmic protein	-4.0867	7.23187	8.9e-06	9.98e-05
ecl8_03224	cmoM	tRNA 5-carboxymethoxyuridine methyltransferase	-4.07177	5.18762	0.0405113	0.111394
ecl8_03211	sdaC_2	Serine transporter	-4.05079	6.91407	0.00388877	0.0163314
ecl8_01469	hisQ_1	Histidine transport system permease protein HisQ	-4.02265	4.96747	0.0479667	0.126288
ecl8_03485	sucA	2-oxoglutarate dehydrogenase E1 component	-4.02188	6.01616	0.0161041	0.0521979
ecl8_03217	gloC	Hydroxyacylglutathione hydrolase GloC	-4.01405	5.17284	0.0197667	0.0617363
ecl8_02637	rspR	HTH-type transcriptional repressor RspR	-3.9933	4.97513	0.0172924	0.0552465
ecl8_03478	ecl8_03478	hypothetical protein	-3.96582	4.69393	0.0483576	0.127167
ecl8_02230	anmK	Anhydro-N-acetylmuramic acid kinase	-3.95879	5.01355	0.0509081	0.13216
ecl8_01806	cutC_1	Copper homeostasis protein CutC	-3.92467	5.24603	0.050198	0.130773
ecl8_03792	ecl8_03792	hypothetical protein	-3.89404	4.93935	0.0567641	0.143927
ecl8_04105	rcsF	Outer membrane lipoprotein RcsF	-3.85457	6.91844	2.53e-05	0.000241043
ecl8_01999	ecl8_01999	hypothetical protein	-3.85098	5.11599	0.0547279	0.139958
ecl8_02490	pgtB	Phosphoglycerate transport system sensor protein PgtB	-3.84885	6.86231	0.000208204	0.00139638
ecl8_00476	yhcB	Inner membrane protein YhcB	-3.84283	4.93389	0.0294302	0.085678
ecl8_00469	yhcO	putative protein YhcO	-3.83828	4.03601	0.0511041	0.132591
ecl8_02464	ecl8_02464	hypothetical protein	-3.81816	6.29363	0.0299275	0.0869044
ecl8_04231	cra_2	Catabolite repressor/activator	-3.80941	7.55038	4.82e-10	3.36e-08
ecl8_00799	ureE_2	Urease accessory protein UreE	-3.77521	7.08167	4.32e-06	5.49e-05
ecl8_05064	nagB_2	Glucosamine-6-phosphate deaminase	-3.77437	6.5532	0.0105809	0.0369543
ecl8_03287	potA_4	Spermidine/putrescine import ATP-binding protein PotA	-3.76313	6.05086	0.0215348	0.0661924
ecl8_04796	yjaB_2	putative N-acetyltransferase YjaB	-3.75503	6.07986	0.0174732	0.0556792
ecl8_04602	ulaC_3	Ascorbate-specific PTS system EIIA component	-3.75364	5.79109	0.0519421	0.134453
ecl8_01398	dam_2	DNA adenine methylase	-3.75285	6.79236	0.00155777	0.00752723
ecl8_01394	rdgC_1	Recombination-associated protein RdgC	-3.74939	7.52747	1.84e-05	0.000184367
ecl8_05199	ecl8_05199	hypothetical protein	-3.74285	6.42118	0.00403296	0.0168361
ecl8_01427	bamE_2	Outer membrane protein assembly factor BamE	-3.73575	7.33778	3.7e-05	0.000334893
ecl8_03756	ecl8_03756	hypothetical protein	-3.7267	5.83839	0.0532736	0.137103
ecl8_03866	acrR_2	HTH-type transcriptional regulator AcrR	-3.72111	5.73103	0.0378946	0.105236
ecl8_00423	zntR	HTH-type transcriptional regulator ZntR	-3.71339	6.42791	0.00582217	0.0227182
ecl8_00708	ydfK_1	putative membrane protein YdfK	-3.70701	5.8056	0.025456	0.0760952
ecl8_00814	pdeG_1	putative cyclic di-GMP phosphodiesterase PdeG	-3.68887	8.09642	6.28e-05	0.000517841
ecl8_05175	cusF_2	Cation efflux system protein CusF	-3.67745	5.64536	0.0617567	0.153275
ecl8_02473	cysL_2	HTH-type transcriptional regulator CysL	-3.6669	5.11321	0.0695475	0.168211
ecl8_02702	pntA	NAD(P) transhydrogenase subunit alpha	-3.64794	6.07596	0.0100998	0.0356369
ecl8_04082	eamB	Cysteine/O-acetylserine efflux protein	-3.64467	6.16086	0.0443348	0.119121
ecl8_01778	sdiA	Regulatory protein SdiA	-3.62269	7.4752	7.01e-09	2.82e-07
ecl8_05019	polA	DNA polymerase I	-3.61057	5.59841	0.0238958	0.0721564
ecl8_05012	typA	GTP-binding protein TypA/BipA	-3.60388	8.49795	1.73e-13	3.86e-11
ecl8_01423	ecl8_01423	hypothetical protein	-3.59283	6.22533	0.0110624	0.038158
ecl8_00143	ecl8_00143	hypothetical protein	-3.58778	5.39733	0.0738967	0.175963
ecl8_03802	ecl8_03802	hypothetical protein	-3.58093	5.79483	0.0646406	0.158579
ecl8_04089	mltD	Membrane-bound lytic murein transglycosylase D	-3.57689	7.18238	3.71e-05	0.000334893
ecl8_00566	yhaH	Inner membrane protein YhaH	-3.55509	5.96742	0.0621239	0.153758
ecl8_02495	iolS_2	Aldo-keto reductase IolS	-3.52766	6.42841	0.0370539	0.103417
ecl8_01858	manZ_1	PTS system mannose-specific EIID component	-3.51953	5.99898	0.0159901	0.0518661
ecl8_01791	ecl8_01791	hypothetical protein	-3.51661	4.61367	0.0795397	0.185926
ecl8_04580	araC_4	Arabinose operon regulatory protein	-3.51344	6.51525	0.0312791	0.0903529
ecl8_02241	rsxD	Electron transport complex subunit RsxD	-3.50421	4.86366	0.0823646	0.190829
ecl8_00146	ecl8_00146	Glycogen synthase	-3.49416	7.19925	0.0107353	0.0373767
ecl8_03800	ecl8_03800	hypothetical protein	-3.48839	5.78704	0.0715753	0.171795
ecl8_01382	cynR_2	HTH-type transcriptional regulator CynR	-3.47404	6.15693	0.0209975	0.0648988
ecl8_01288	ppk	Polyphosphate kinase	-3.4739	6.49406	0.00278539	0.0123857
ecl8_04794	aceB	Malate synthase A	-3.47273	7.40038	1.13e-07	2.72e-06
ecl8_00505	mlaD	putative phospholipid ABC transporter-binding protein MlaD	-3.46558	6.93246	6.03e-05	0.000503092
ecl8_00194	ecl8_00194	hypothetical protein	-3.46549	7.72296	6.32e-07	1.11e-05
ecl8_01810	ecl8_01810	hypothetical protein	-3.45244	6.185	0.0543317	0.139103
ecl8_00436	ecl8_00436	hypothetical protein	-3.43892	6.52227	0.0340035	0.0964731
ecl8_01197	bamD	Outer membrane protein assembly factor BamD	-3.43508	4.54144	0.0866924	0.19818
ecl8_03755	ecl8_03755	hypothetical protein	-3.41363	6.59763	0.00559458	0.0219068
ecl8_05025	mobB	Molybdopterin-guanine dinucleotide biosynthesis adapter protein	-3.4002	6.27015	0.0108425	0.037608
ecl8_01437	ecl8_01437	hypothetical protein	-3.39738	5.82515	0.077719	0.182531
ecl8_01988	ecl8_01988	Cyclic nucleotide-gated potassium channel	-3.39705	6.08738	0.0676339	0.164385
ecl8_01027	ecl8_01027	hypothetical protein	-3.3953	4.505	0.0919316	0.206661
ecl8_01845	msrC	Free methionine-R-sulfoxide reductase	-3.37609	4.91963	0.0903382	0.204418
ecl8_02008	ecl8_02008	hypothetical protein	-3.36324	5.99229	0.0183087	0.0579127
ecl8_01416	ecl8_01416	hypothetical protein	-3.35871	7.81349	3.26e-10	2.51e-08
ecl8_03808	ecl8_03808	hypothetical protein	-3.35868	5.76071	0.0858247	0.196296
ecl8_02472	dmlR_12	HTH-type transcriptional regulator DmlR	-3.35551	6.43819	0.0116957	0.0398797
ecl8_05020	yihG	putative acyltransferase YihG	-3.35465	7.64947	1.62e-05	0.000164675
ecl8_04585	hxlR	HTH-type transcriptional activator HxlR	-3.35309	4.53955	0.0901967	0.204202
ecl8_01413	ecl8_01413	hypothetical protein	-3.33887	6.37563	0.052452	0.135301
ecl8_01298	bepA	Beta-barrel assembly-enhancing protease	-3.32963	6.78912	0.00700084	0.0263937
ecl8_02532	ecl8_02532	hypothetical protein	-3.32789	4.40096	0.0558321	0.142049
ecl8_00516	dacB	D-alanyl-D-alanine carboxypeptidase DacB	-3.32738	7.44736	0.0117597	0.0400675
ecl8_00811	crcB_2	Putative fluoride ion transporter CrcB	-3.32717	7.67552	9.63e-08	2.35e-06
ecl8_03784	rrrD_2	Lysozyme RrrD	-3.32537	6.69341	0.0174778	0.0556792
ecl8_03564	pagP	Lipid A palmitoyltransferase PagP	-3.31997	6.93377	6.49e-05	0.000532438
ecl8_03776	ecl8_03776	hypothetical protein	-3.31182	7.42069	1.04e-06	1.67e-05
ecl8_04087	ecl8_04087	hypothetical protein	-3.30982	6.33045	0.0554975	0.141387
ecl8_04934	btuB	Vitamin B12 transporter BtuB	-3.28848	9.15279	6.61e-16	2.95e-13
ecl8_01214	srmB	ATP-dependent RNA helicase SrmB	-3.28771	5.29422	0.102862	0.225802
ecl8_03441	bluF_2	Blue light- and temperature-regulated antirepressor BluF	-3.27434	7.93421	6.61e-08	1.69e-06
ecl8_04481	ecl8_04481	hypothetical protein	-3.26707	4.99289	0.0630308	0.155571
ecl8_01534	rcsC	Sensor histidine kinase RcsC	-3.25808	7.54778	0.000310619	0.00192679
ecl8_04479	ecl8_04479	hypothetical protein	-3.24519	7.26193	0.000260224	0.00167233
ecl8_03764	ecl8_03764	hypothetical protein	-3.24463	7.20691	4.54e-05	0.000394485
ecl8_00798	ureF_2	Urease accessory protein UreF	-3.24191	8.07398	1.12e-10	1.06e-08
ecl8_01732	aaeA_2	p-hydroxybenzoic acid efflux pump subunit AaeA	-3.23768	7.75663	4.05e-05	0.00035875
ecl8_04242	aroD	3-dehydroquinate dehydratase	-3.23528	6.97442	0.00528754	0.0209995
ecl8_03317	ecl8_03317	hypothetical protein	-3.22562	4.74389	0.0797681	0.186287
ecl8_04400	ecl8_04400	hypothetical protein	-3.22082	4.78256	0.105856	0.230302
ecl8_01406	ecl8_01406	hypothetical protein	-3.21682	6.46794	0.00722402	0.0270977
ecl8_04490	ecl8_04490	hypothetical protein	-3.2073	8.6221	6.68e-15	2.13e-12
ecl8_00776	idi	Isopentenyl-diphosphate Delta-isomerase	-3.19889	5.14285	0.0798161	0.186287
ecl8_02640	lgoT	putative L-galactonate transporter	-3.1811	5.77546	0.0347073	0.0980333
ecl8_02460	oxlT	Oxalate:formate antiporter	-3.18049	5.87385	0.0705822	0.170068
ecl8_01805	yecM	Protein YecM	-3.1775	5.57033	0.111192	0.238077
ecl8_00572	yqjC	Protein YqjC	-3.17715	4.74513	0.112727	0.240327
ecl8_02489	pgtC	Phosphoglycerate transport regulatory protein PgtC	-3.16937	7.08553	0.00357761	0.0151818
ecl8_03166	pdeG_3	putative cyclic di-GMP phosphodiesterase PdeG	-3.15779	6.33781	0.0131722	0.0440103
ecl8_00445	acrE	Multidrug export protein AcrE	-3.14469	7.97984	1.94e-10	1.66e-08
ecl8_01478	yfcD	putative Nudix hydrolase YfcD	-3.14294	5.31259	0.115156	0.243756
ecl8_04765	malK_3	Maltose/maltodextrin import ATP-binding protein MalK	-3.13825	7.46196	8.34e-07	1.39e-05
ecl8_04478	ecl8_04478	hypothetical protein	-3.13556	9.07133	1.38e-13	3.25e-11
ecl8_01388	ecl8_01388	hypothetical protein	-3.13535	7.17357	0.000166573	0.00116628
ecl8_01639	ddpC_2	putative D,D-dipeptide transport system permease protein DdpC	-3.12075	5.53733	0.0641959	0.157662
ecl8_01875	minC	Septum site-determining protein MinC	-3.11929	5.58973	0.0413914	0.113185
ecl8_01786	dapA_2	4-hydroxy-tetrahydrodipicolinate synthase	-3.11754	5.25499	0.118315	0.247739
ecl8_05033	rbsK_3	Ribokinase	-3.11705	6.64982	0.00698945	0.026373
ecl8_01762	yedR	Inner membrane protein YedR	-3.10132	4.78009	0.122269	0.253638
ecl8_03212	dpaL	Diaminopropionate ammonia-lyase	-3.094	7.50863	6.27e-07	1.1e-05
ecl8_00490	elbB	Glyoxalase ElbB	-3.09319	6.35038	0.0731321	0.174609
ecl8_03768	ecl8_03768	hypothetical protein	-3.06925	8.41984	3.44e-10	2.52e-08
ecl8_02699	uspE	Universal stress protein E	-3.06828	5.10208	0.0535471	0.137558
ecl8_01405	ecl8_01405	hypothetical protein	-3.06501	7.35111	1.26e-05	0.000134186
ecl8_01289	purN	Phosphoribosylglycinamide formyltransferase	-3.06154	5.84045	0.0892594	0.202552
ecl8_05042	asnC	Regulatory protein AsnC	-3.0518	7.6182	1.04e-06	1.68e-05
ecl8_04839	murB	UDP-N-acetylenolpyruvoylglucosamine reductase	-3.04853	4.59	0.0733839	0.17488
ecl8_02498	ecl8_02498	hypothetical protein	-3.03862	5.50275	0.0438127	0.118134
ecl8_01273	ecl8_01273	hypothetical protein	-3.0032	4.7901	0.137057	0.275856
ecl8_00744	argO	Arginine exporter protein ArgO	-2.99483	6.06882	0.109801	0.236235
ecl8_05036	rbsA_5	Ribose import ATP-binding protein RbsA	-2.99332	8.42803	0.000138264	0.000989821
ecl8_01425	ecl8_01425	hypothetical protein	-2.98958	5.26784	0.137788	0.276817
ecl8_02381	chbA_3	PTS system N,N'-diacetylchitobiose-specific EIIA component	-2.97757	5.29438	0.0746762	0.17721
ecl8_04571	ecl8_04571	hypothetical protein	-2.96866	5.55489	0.134958	0.273101
ecl8_01775	dcyD	D-cysteine desulfhydrase	-2.96127	6.10176	0.11195	0.239357
ecl8_04577	ecl8_04577	hypothetical protein	-2.95383	7.76215	0.0082364	0.030234
ecl8_00489	arcB	Aerobic respiration control sensor protein ArcB	-2.95344	6.25618	0.0469911	0.124159
ecl8_00491	mtgA	Biosynthetic peptidoglycan transglycosylase	-2.95295	6.0135	0.118981	0.24855
ecl8_00995	eno	Enolase	-2.94401	4.69196	0.143636	0.285226
ecl8_04198	pdhR_1	Pyruvate dehydrogenase complex repressor	-2.93836	5.40507	0.0653788	0.15995
ecl8_04040	ecl8_04040	hypothetical protein	-2.93686	6.14858	0.0793396	0.185612
ecl8_03333	ecl8_03333	hypothetical protein	-2.93487	6.72494	0.0040049	0.016756
ecl8_03100	dinI_2	DNA damage-inducible protein I	-2.93442	5.09535	0.143068	0.284352
ecl8_00783	ecl8_00783	hypothetical protein	-2.93193	7.9183	1.86e-08	6.59e-07
ecl8_02474	attM	N-acyl homoserine lactonase AttM	-2.93137	7.05963	0.00628122	0.024171
ecl8_00008	lutR	HTH-type transcriptional regulator LutR	-2.92769	6.44732	0.0828805	0.191676
ecl8_03915	ecl8_03915	hypothetical protein	-2.92579	5.47332	0.0656615	0.160378
ecl8_03561	ybeM	Deaminated glutathione amidase	-2.92002	5.86487	0.128653	0.263934
ecl8_01438	ecl8_01438	hypothetical protein	-2.91479	6.83585	0.0523702	0.135247
ecl8_00526	ecl8_00526	hypothetical protein	-2.91456	7.66775	4.86e-07	8.81e-06
ecl8_04969	cpxR	Transcriptional regulatory protein CpxR	-2.90985	7.14004	9.65e-05	0.000736599
ecl8_03321	ecl8_03321	hypothetical protein	-2.90638	6.98541	0.0162645	0.0525491
ecl8_00567	yqjG	Glutathionyl-hydroquinone reductase YqjG	-2.9045	6.05634	0.0714649	0.171795
ecl8_03254	msbA_2	Lipid A export ATP-binding/permease protein MsbA	-2.89271	5.68725	0.138674	0.27797
ecl8_01282	chuR_2	Anaerobic sulfatase-maturating enzyme	-2.89116	7.85123	0.0051425	0.0204782
ecl8_04726	soxR	Redox-sensitive transcriptional activator SoxR	-2.88374	6.11543	0.117116	0.246792
ecl8_03539	gltK_1	Glutamate/aspartate import permease protein GltK	-2.88201	6.38723	0.01862	0.0587724
ecl8_00575	lldR_2	Putative L-lactate dehydrogenase operon regulatory protein	-2.87343	6.24992	0.0324046	0.0929436
ecl8_01476	yfcF	Glutathione S-transferase YfcF	-2.8717	4.72274	0.154407	0.299807
ecl8_03184	mgsA	Methylglyoxal synthase	-2.87148	6.23611	0.108906	0.234647
ecl8_03027	nudJ	Phosphatase NudJ	-2.86642	4.18646	0.146368	0.289106
ecl8_00492	ptsO	Phosphocarrier protein NPr	-2.86591	5.36169	0.113389	0.241045
ecl8_05130	ecl8_05130	hypothetical protein	-2.85954	5.85608	0.0453878	0.121288
ecl8_01851	ecl8_01851	hypothetical protein	-2.85822	4.6185	0.156622	0.302265
ecl8_00808	evgA_4	DNA-binding transcriptional activator EvgA	-2.85387	6.26653	0.105091	0.229083
ecl8_04718	lpfB_2	putative fimbrial chaperone LpfB	-2.83974	6.77299	0.00291643	0.0128151
ecl8_00428	rsmB	Ribosomal RNA small subunit methyltransferase B	-2.83826	7.54256	1.2e-06	1.87e-05
ecl8_00791	oppD_1	Oligopeptide transport ATP-binding protein OppD	-2.83684	7.58987	6.64e-05	0.000541428
ecl8_03462	pnuC	Nicotinamide riboside transporter PnuC	-2.83518	5.59065	0.151195	0.296149
ecl8_03905	queC	7-cyano-7-deazaguanine synthase	-2.83006	5.96264	0.136962	0.275856
ecl8_03782	ecl8_03782	hypothetical protein	-2.82776	6.7244	0.00433294	0.0177946
ecl8_00980	queF	NADPH-dependent 7-cyano-7-deazaguanine reductase	-2.81836	6.22079	0.11763	0.247261
ecl8_01369	pdeA	putative cyclic di-GMP phosphodiesterase PdeA	-2.81666	7.77623	6.58e-08	1.69e-06
ecl8_03314	rrrD_1	Lysozyme RrrD	-2.81643	4.95695	0.165104	0.313748
ecl8_04471	ecl8_04471	hypothetical protein	-2.81495	7.84319	9.1e-07	1.5e-05
ecl8_00737	speB	Agmatinase	-2.81271	6.71289	0.0293597	0.0855286
ecl8_03820	ecl8_03820	hypothetical protein	-2.81065	5.45969	0.156036	0.301525
ecl8_02189	rhtC_1	Threonine efflux protein	-2.80109	5.14904	0.160917	0.308083
ecl8_02528	ecl8_02528	putative signaling protein	-2.79963	6.62023	0.00778325	0.0288077
ecl8_00506	mlaC	putative phospholipid-binding protein MlaC	-2.79348	6.90571	0.00100575	0.00522195
ecl8_03488	sdhD	Succinate dehydrogenase hydrophobic membrane anchor subunit	-2.79238	5.42934	0.157381	0.302984
ecl8_04868	pldB	Lysophospholipase L2	-2.78834	7.73209	2.35e-06	3.24e-05
ecl8_04847	yigZ	IMPACT family member YigZ	-2.77998	7.12276	0.000454349	0.00265235
ecl8_00432	smg	Protein Smg	-2.77909	7.27122	3.05e-05	0.000283221
ecl8_04367	manZ_3	PTS system mannose-specific EIID component	-2.76964	6.68566	0.00631432	0.0242357
ecl8_03903	cof	HMP-PP phosphatase	-2.76595	6.73767	0.0732581	0.174723
ecl8_04103	metI_4	D-methionine transport system permease protein MetI	-2.76269	7.31626	2.3e-05	0.000221091
ecl8_03877	lacI_2	Lactose operon repressor	-2.76189	6.06017	0.14253	0.283788
ecl8_03038	potB_1	Spermidine/putrescine transport system permease protein PotB	-2.7493	5.00731	0.17259	0.323987
ecl8_00426	mscL	Large-conductance mechanosensitive channel	-2.7475	9.23076	1.67e-06	2.46e-05
ecl8_00813	ecl8_00813	hypothetical protein	-2.74336	7.36555	0.000121857	0.000895356
ecl8_04344	holD	DNA polymerase III subunit psi	-2.73799	4.96247	0.174299	0.325806
ecl8_04081	yafV	Omega-amidase YafV	-2.73644	5.66336	0.163782	0.311669
ecl8_01460	dedA	Protein DedA	-2.73422	6.23687	0.0631702	0.155752
ecl8_04031	proA	Gamma-glutamyl phosphate reductase	-2.73057	6.33595	0.0491259	0.128656
ecl8_00698	ecl8_00698	hypothetical protein	-2.7293	7.6607	0.000649897	0.00359175
ecl8_03570	ahpC_1	Alkyl hydroperoxide reductase C	-2.7278	5.92495	0.0540869	0.138637
ecl8_00504	mlaE	putative phospholipid ABC transporter permease protein MlaE	-2.72385	6.98945	0.000858377	0.00454136
ecl8_00446	acrR_1	HTH-type transcriptional regulator AcrR	-2.72254	8.61001	9.78e-12	1.56e-09
ecl8_05011	yihX	Alpha-D-glucose 1-phosphate phosphatase YihX	-2.72244	7.53549	2.01e-05	0.000199052
ecl8_01410	ecl8_01410	hypothetical protein	-2.71236	5.10623	0.176075	0.3283
ecl8_04463	potB_2	Spermidine/putrescine transport system permease protein PotB	-2.71214	7.18066	0.000168277	0.00117085
ecl8_04468	ecl8_04468	hypothetical protein	-2.71167	5.83838	0.09434	0.211161
ecl8_02488	pgtP	Phosphoglycerate transporter protein	-2.7084	7.98318	2.3e-08	7.63e-07
ecl8_02229	slyB	Outer membrane lipoprotein SlyB	-2.70661	6.52681	0.0125237	0.0421869
ecl8_04300	dnaJ	Chaperone protein DnaJ	-2.68394	5.42432	0.0823576	0.190829
ecl8_02626	bluF_1	Blue light- and temperature-regulated antirepressor BluF	-2.68111	5.84433	0.0595538	0.149203
ecl8_02657	ecl8_02657	hypothetical protein	-2.67948	4.52218	0.102927	0.225802
ecl8_01296	rpnA_1	Recombination-promoting nuclease RpnA	-2.67568	6.34933	0.12128	0.252054
ecl8_05015	ntrC	DNA-binding transcriptional regulator NtrC	-2.67117	8.00948	2.93e-07	5.84e-06
ecl8_00488	uxuA_1	Mannonate dehydratase	-2.66731	7.14705	0.0592526	0.148715
ecl8_02004	ecl8_02004	hypothetical protein	-2.66439	6.00049	0.0603913	0.15064
ecl8_05066	adeP	Adenine permease AdeP	-2.649	7.9981	4.85e-08	1.34e-06
ecl8_04861	ecl8_04861	hypothetical protein	-2.64712	8.4394	2.17e-08	7.45e-07
ecl8_04862	udp	Uridine phosphorylase	-2.64073	6.99857	0.00973517	0.0347073
ecl8_00348	nudE	ADP compounds hydrolase NudE	-2.63453	6.44372	0.0486842	0.1278
ecl8_03074	ptsG_1	PTS system glucose-specific EIICB component	-2.63277	6.51203	0.0168531	0.0541534
ecl8_00795	ecl8_00795	Urea transporter	-2.63067	9.24832	6.82e-09	2.77e-07
ecl8_03179	appY	HTH-type transcriptional regulator AppY	-2.62228	5.94134	0.171522	0.322507
ecl8_03759	ecl8_03759	hypothetical protein	-2.61319	8.18112	4.26e-08	1.22e-06
ecl8_00732	endA	Endonuclease-1	-2.61306	6.30413	0.0326933	0.0935892
ecl8_05040	viaA	Protein ViaA	-2.61196	8.09086	2.9e-07	5.8e-06
ecl8_05009	dtd	D-aminoacyl-tRNA deacylase	-2.6102	5.55337	0.0841766	0.19342
ecl8_04030	proB	Glutamate 5-kinase	-2.60837	6.16457	0.0437417	0.118041
ecl8_01974	purU	Formyltetrahydrofolate deformylase	-2.60391	6.04247	0.117321	0.246817
ecl8_01180	ecl8_01180	hypothetical protein	-2.59878	7.79041	0.00204063	0.00947058
ecl8_05088	ecl8_05088	hypothetical protein	-2.59844	6.69364	0.101369	0.22317
ecl8_04793	aceA	Isocitrate lyase	-2.59523	7.27012	0.000249355	0.00161821
ecl8_05057	pstS	Phosphate-binding protein PstS	-2.59162	6.2443	0.101259	0.223129
ecl8_02839	yraA	Putative cysteine protease YraA	-2.59054	6.03996	0.169711	0.320046
ecl8_04768	malG_2	Maltose transport system permease protein MalG	-2.58908	7.41494	3.04e-05	0.000283139
ecl8_02001	ecl8_02001	hypothetical protein	-2.58752	6.87109	0.00543622	0.0214752
ecl8_00422	ecl8_00422	hypothetical protein	-2.58444	5.7777	0.187063	0.341647
ecl8_01032	ecl8_01032	hypothetical protein	-2.58063	7.02168	0.0019551	0.00915938
ecl8_04641	blc_2	Outer membrane lipoprotein Blc	-2.57497	6.57797	0.0253654	0.0759258
ecl8_00546	ecl8_00546	hypothetical protein	-2.57389	5.29496	0.1957	0.352512
ecl8_03194	ecl8_03194	hypothetical protein	-2.57268	5.86345	0.0684544	0.165928
ecl8_04575	tamA	Translocation and assembly module subunit TamA	-2.56902	7.9547	4.94e-07	8.91e-06
ecl8_01404	ecl8_01404	hypothetical protein	-2.56785	7.41696	0.0212615	0.0655785
ecl8_02022	btuE	Thioredoxin/glutathione peroxidase BtuE	-2.5658	5.24268	0.162634	0.310111
ecl8_05248	ecl8_05248	hypothetical protein	-2.56569	5.18422	0.201983	0.360049
ecl8_01417	ecl8_01417	hypothetical protein	-2.56568	6.96684	0.00133564	0.00658229
ecl8_01739	mdtJ_1	Spermidine export protein MdtJ	-2.56278	6.47402	0.0295645	0.0860129
ecl8_03816	ecl8_03816	hypothetical protein	-2.56031	6.48922	0.0345124	0.097614
ecl8_01052	galR_2	HTH-type transcriptional regulator GalR	-2.55855	6.23494	0.038672	0.106996
ecl8_05039	ravA	ATPase RavA	-2.557	8.2954	9.49e-09	3.56e-07
ecl8_04866	ecl8_04866	hypothetical protein	-2.55143	7.79737	3.07e-06	4.13e-05
ecl8_03819	ecl8_03819	hypothetical protein	-2.54429	6.624	0.0131735	0.0440103
ecl8_01240	yphA_1	Inner membrane protein YphA	-2.53918	5.02004	0.210364	0.37084
ecl8_04106	trmO	tRNA (adenine(37)-N6)-methyltransferase	-2.53871	5.99978	0.146712	0.289408
ecl8_01225	recO	DNA repair protein RecO	-2.5371	5.49073	0.128003	0.262843
ecl8_03034	phoQ	Sensor protein PhoQ	-2.53682	6.30851	0.117318	0.246817
ecl8_00807	emrK_1	putative multidrug resistance protein EmrK	-2.53618	7.94081	1.66e-06	2.45e-05
ecl8_01426	ecl8_01426	hypothetical protein	-2.53258	6.98907	0.00417325	0.017298
ecl8_03165	pdeG_2	putative cyclic di-GMP phosphodiesterase PdeG	-2.53178	4.8355	0.102917	0.225802
ecl8_00661	cpdA_1	3',5'-cyclic adenosine monophosphate phosphodiesterase CpdA	-2.52915	6.39197	0.144185	0.285882
ecl8_00573	mzrA	Modulator protein MzrA	-2.52773	6.07462	0.179698	0.332968
ecl8_01392	ecl8_01392	hypothetical protein	-2.52695	5.85014	0.103951	0.227378
ecl8_04188	speE	Polyamine aminopropyltransferase	-2.52461	6.52224	0.048993	0.128459
ecl8_00790	yejF_1	putative ABC transporter ATP-binding protein YejF	-2.52228	7.32333	0.000144717	0.0010294
ecl8_01532	atoC	Regulatory protein AtoC	-2.52225	6.40485	0.045523	0.121462
ecl8_01294	uraA	Uracil permease	-2.51983	6.6363	0.119179	0.24872
ecl8_03910	lon_2	Lon protease	-2.51898	7.51292	5.13e-05	0.000437343
ecl8_03463	nadA	Quinolinate synthase A	-2.51756	5.52041	0.204727	0.363632
ecl8_04464	ydcV_4	Inner membrane ABC transporter permease protein YdcV	-2.51579	7.86552	1.11e-06	1.75e-05
ecl8_00503	mlaF	putative phospholipid import ATP-binding protein MlaF	-2.51437	7.53831	5.55e-05	0.000469761
ecl8_05031	hsrA_3	putative transport protein HsrA	-2.51374	8.99152	5.51e-11	6.3e-09
ecl8_00370	pabA	Aminodeoxychorismate synthase component 2	-2.51219	6.25272	0.0465419	0.123411
ecl8_00381	ecl8_00381	hypothetical protein	-2.50393	5.82509	0.198351	0.355994
ecl8_01353	cysK	Cysteine synthase A	-2.50268	5.92353	0.153319	0.298603
ecl8_00787	esiB	Secretory immunoglobulin A-binding protein EsiB	-2.49799	8.7002	7.1e-07	1.23e-05
ecl8_05004	fdhE	Protein FdhE	-2.49781	7.49134	0.000251984	0.00162406
ecl8_05063	axe16A	Carbohydrate acetyl esterase/feruloyl esterase	-2.49394	7.82939	1.11e-06	1.75e-05
ecl8_00815	ecl8_00815	hypothetical protein	-2.4868	8.78717	3.79e-10	2.72e-08
ecl8_00374	yhfA	Protein YhfA	-2.48584	7.06629	0.00190348	0.0089764
ecl8_04657	ecl8_04657	hypothetical protein	-2.48555	7.25848	0.000188617	0.0012942
ecl8_03899	mdlB	Multidrug resistance-like ATP-binding protein MdlB	-2.48478	7.15798	0.02835	0.0830756
ecl8_01373	gpr	L-glyceraldehyde 3-phosphate reductase	-2.48454	6.53754	0.0415526	0.113487
ecl8_04634	mscM	Miniconductance mechanosensitive channel MscM	-2.48247	8.51818	7.22e-10	4.47e-08
ecl8_03780	ecl8_03780	hypothetical protein	-2.48025	6.48649	0.090894	0.205015
ecl8_00372	yccS_1	Inner membrane protein YccS	-2.47982	8.9031	6.66e-11	7.07e-09
ecl8_04359	ecl8_04359	hypothetical protein	-2.47754	6.45268	0.0464847	0.123332
ecl8_00427	trkA	Trk system potassium uptake protein TrkA	-2.4758	7.2893	0.000377666	0.00227621
ecl8_04090	ycgJ	putative methyltransferase YcgJ	-2.47408	6.42256	0.0636493	0.156664
ecl8_05065	yieH	6-phosphogluconate phosphatase	-2.47149	7.31669	0.000118989	0.000877171
ecl8_01029	ecl8_01029	hypothetical protein	-2.46887	5.37848	0.114448	0.242488
ecl8_04267	rsmA	Ribosomal RNA small subunit methyltransferase A	-2.46849	5.70898	0.208766	0.368752
ecl8_04865	metR	HTH-type transcriptional regulator MetR	-2.46264	7.49574	0.000877325	0.0046269
ecl8_04935	trmA	tRNA/tmRNA (uracil-C(5))-methyltransferase	-2.46154	8.12485	3.36e-07	6.49e-06
ecl8_04791	iclR	Transcriptional repressor IclR	-2.45689	7.05633	0.0176796	0.056282
ecl8_05209	yciC_2	Putative metal chaperone YciC	-2.45646	6.87852	0.072462	0.173287
ecl8_03778	ecl8_03778	hypothetical protein	-2.45264	8.68051	2.48e-08	7.9e-07
ecl8_00326	glpG	Rhomboid protease GlpG	-2.44981	7.49522	6.66e-05	0.000541428
ecl8_03107	ecl8_03107	hypothetical protein	-2.44072	4.78299	0.226564	0.3909
ecl8_00730	gshB	Glutathione synthetase	-2.43979	5.85462	0.0790019	0.18496
ecl8_01811	yecD	Isochorismatase family protein YecD	-2.43683	4.93757	0.125261	0.258641
ecl8_00007	ecl8_00007	hypothetical protein	-2.43509	7.45353	0.00314482	0.0136637
ecl8_04808	hupA	DNA-binding protein HU-alpha	-2.43144	5.02222	0.134954	0.273101
ecl8_01393	ecl8_01393	hypothetical protein	-2.42503	5.5728	0.119883	0.249734
ecl8_04720	yohK_2	Inner membrane protein YohK	-2.41132	8.12726	2.27e-05	0.000219083
ecl8_03785	ecl8_03785	hypothetical protein	-2.41084	5.74978	0.130099	0.266166
ecl8_04899	wecD	dTDP-fucosamine acetyltransferase	-2.40969	6.76262	0.119229	0.24872
ecl8_05016	hemN_2	Oxygen-independent coproporphyrinogen III oxidase	-2.40598	8.10284	1.77e-06	2.59e-05
ecl8_00482	nanE	Putative N-acetylmannosamine-6-phosphate 2-epimerase	-2.40525	6.4538	0.0459639	0.122169
ecl8_03520	nagB_1	Glucosamine-6-phosphate deaminase	-2.40491	6.60329	0.0284426	0.0832023
ecl8_04496	ecl8_04496	hypothetical protein	-2.4015	9.1985	6.69e-09	2.74e-07
ecl8_04593	rplI	50S ribosomal protein L9	-2.40106	4.19407	0.226878	0.391291
ecl8_03769	ecl8_03769	hypothetical protein	-2.3987	6.29386	0.148004	0.291176
ecl8_00485	rimO_1	Ribosomal protein S12 methylthiotransferase RimO	-2.39626	6.99871	0.0595806	0.149203
ecl8_00788	hdeA	Acid stress chaperone HdeA	-2.39552	4.41383	0.225839	0.3898
ecl8_03377	rhtA	Threonine/homoserine exporter RhtA	-2.39112	6.03594	0.0771226	0.181513
ecl8_01755	cbl_2	HTH-type transcriptional regulator cbl	-2.38307	6.80123	0.0344391	0.0975229
ecl8_05058	pstC	Phosphate transport system permease protein PstC	-2.37881	6.00961	0.163477	0.311451
ecl8_03481	cydA_2	Cytochrome bd-I ubiquinol oxidase subunit 1	-2.37688	6.62306	0.0233638	0.070838
ecl8_00993	mazG	Nucleoside triphosphate pyrophosphohydrolase	-2.37154	6.12052	0.165005	0.313693
ecl8_01763	yedJ	putative protein YedJ	-2.36747	5.79228	0.223154	0.386511
ecl8_03790	ecl8_03790	hypothetical protein	-2.3664	5.22447	0.19896	0.356723
ecl8_00473	mdh_1	Malate dehydrogenase	-2.36148	7.14152	0.000961678	0.00501647
ecl8_04556	ecl8_04556	hypothetical protein	-2.35794	5.0132	0.242185	0.409694
ecl8_00796	ureH	Urease accessory protein UreH	-2.35699	8.40682	8.33e-07	1.39e-05
ecl8_04234	leuO	HTH-type transcriptional regulator LeuO	-2.35362	9.3778	2.93e-10	2.38e-08
ecl8_00784	evgS_2	Sensor protein EvgS	-2.3515	9.28083	9.24e-11	9.37e-09
ecl8_02923	kduD_2	2-dehydro-3-deoxy-D-gluconate 5-dehydrogenase	-2.34892	5.85316	0.14147	0.282054
ecl8_04354	bglJ	Transcriptional activator protein BglJ	-2.34864	8.19274	2.73e-06	3.72e-05
ecl8_01283	ecl8_01283	hypothetical protein	-2.34539	7.18077	0.00140234	0.00688817
ecl8_01986	oppD_3	Oligopeptide transport ATP-binding protein OppD	-2.34514	6.3175	0.104974	0.228994
ecl8_00705	ecl8_00705	hypothetical protein	-2.34443	8.75586	5.62e-09	2.37e-07
ecl8_00525	ecl8_00525	hypothetical protein	-2.33995	7.77218	5.2e-06	6.35e-05
ecl8_04205	pilE	Fimbrial protein	-2.33947	5.69841	0.112531	0.240138
ecl8_04262	citB_1	Transcriptional regulatory protein CitB	-2.33302	6.10544	0.0992692	0.21907
ecl8_01738	ecl8_01738	Putative HTH-type transcriptional regulator	-2.33179	9.71519	1.68e-11	2.27e-09
ecl8_04240	aroE_4	Shikimate dehydrogenase (NADP(+))	-2.33135	6.81002	0.00890437	0.0321827
ecl8_03169	yccA	Modulator of FtsH protease YccA	-2.33103	6.35721	0.0468844	0.124098
ecl8_00443	ecl8_00443	hypothetical protein	-2.33086	5.80324	0.0977695	0.216618
ecl8_03210	amaB_2	N-carbamoyl-L-amino acid hydrolase	-2.33042	6.16266	0.0768473	0.18096
ecl8_03788	ecl8_03788	hypothetical protein	-2.32903	6.51463	0.0340004	0.0964731
ecl8_05008	ecl8_05008	Acetyltransferase	-2.32865	7.90743	0.000199106	0.00135369
ecl8_00702	elfD_2	putative fimbrial chaperone protein ElfD	-2.32476	8.15901	1.54e-05	0.000158669
ecl8_00806	emrY	putative multidrug resistance protein EmrY	-2.32221	8.97528	3.96e-10	2.8e-08
ecl8_03117	ghrA_2	Glyoxylate/hydroxypyruvate reductase A	-2.31647	5.98172	0.224606	0.388272
ecl8_00570	yqjE	Inner membrane protein YqjE	-2.31339	5.88645	0.110474	0.237224
ecl8_01779	ecl8_01779	hypothetical protein	-2.31317	6.93271	0.00346143	0.0147873
ecl8_04197	aceE	Pyruvate dehydrogenase E1 component	-2.31271	6.0234	0.0843557	0.193642
ecl8_04558	cybC	Soluble cytochrome b562	-2.30803	6.47131	0.138274	0.27747
ecl8_05087	ecl8_05087	hypothetical protein	-2.30675	6.21292	0.146138	0.288779
ecl8_02508	ecl8_02508	Long-chain-fatty-acid--CoA ligase FadD13	-2.30531	6.87994	0.00661016	0.0252408
ecl8_01419	ecl8_01419	hypothetical protein	-2.30015	4.96552	0.255254	0.424426
ecl8_04137	ecl8_04137	hypothetical protein	-2.29837	6.20149	0.0852018	0.195044
ecl8_00425	arfA	Alternative ribosome-rescue factor A	-2.29696	8.08152	3.82e-05	0.000342133
ecl8_03191	matP	Macrodomain Ter protein	-2.28927	4.19889	0.252756	0.421741
ecl8_03676	sorB_1	PTS system sorbose-specific EIIB component	-2.28859	5.1573	0.254908	0.424212
ecl8_00803	amt	Ammonia channel	-2.28837	8.37324	0.000134161	0.000969828
ecl8_00430	def_1	Peptide deformylase	-2.28784	7.15903	0.00598162	0.0231983
ecl8_05062	bglH_2	Cryptic outer membrane porin BglH	-2.28713	9.97819	2.19e-11	2.87e-09
ecl8_02254	cybB	Cytochrome b561	-2.28662	5.44009	0.12506	0.258346
ecl8_00493	rapZ	RNase adapter protein RapZ	-2.2848	6.09277	0.106652	0.231356
ecl8_01768	dgcQ	putative diguanylate cyclase DgcQ	-2.28396	6.80063	0.0712995	0.171611
ecl8_04821	celA_3	PTS system cellobiose-specific EIIB component	-2.27815	5.28188	0.252761	0.421741
ecl8_01792	hsrA_2	putative transport protein HsrA	-2.27346	6.51353	0.0428052	0.115985
ecl8_03024	ecl8_03024	hypothetical protein	-2.27012	5.58017	0.163801	0.311669
ecl8_02525	ecl8_02525	hypothetical protein	-2.26581	6.31585	0.196498	0.353521
ecl8_02480	frcA_2	Fructose import ATP-binding protein FrcA	-2.26231	4.82363	0.264709	0.435486
ecl8_03914	bolA	DNA-binding transcriptional regulator BolA	-2.26205	6.64484	0.126431	0.260694
ecl8_02701	pntB	NAD(P) transhydrogenase subunit beta	-2.2597	5.42684	0.26127	0.431739
ecl8_05203	thrS_2	Threonine--tRNA ligase	-2.25939	7.4289	0.000206195	0.00138707
ecl8_02529	ecl8_02529	hypothetical protein	-2.25764	5.93631	0.107983	0.233336
ecl8_03795	ecl8_03795	hypothetical protein	-2.25361	7.26964	0.000702425	0.00383924
ecl8_04491	ecl8_04491	hypothetical protein	-2.24827	9.97222	1.47e-09	7.64e-08
ecl8_02209	yahB	putative HTH-type transcriptional regulator YahB	-2.24455	5.18892	0.264852	0.435561
ecl8_01338	yfeZ	Inner membrane protein YfeZ	-2.24299	5.15716	0.147895	0.29109
ecl8_04564	fbp	Fructose-1,6-bisphosphatase class 1	-2.24277	7.46708	0.00169025	0.00808853
ecl8_02968	yeaD	Putative glucose-6-phosphate 1-epimerase	-2.24169	6.39063	0.0569096	0.14418
ecl8_04916	ilvC	Ketol-acid reductoisomerase (NADP(+))	-2.2408	8.07613	3.46e-06	4.55e-05
ecl8_04651	ecl8_04651	hypothetical protein	-2.24041	6.01008	0.133144	0.270534
ecl8_00809	evgS_3	Sensor protein EvgS	-2.23809	8.92028	3.11e-09	1.4e-07
ecl8_01194	ecl8_01194	6-deoxy-6-sulfogluconolactonase	-2.23318	6.6398	0.0266182	0.0788294
ecl8_00577	uxaC	Uronate isomerase	-2.23241	7.46095	0.000269386	0.00171637
ecl8_03258	clpS	ATP-dependent Clp protease adapter protein ClpS	-2.23172	4.73635	0.158463	0.304766
ecl8_03381	glnQ_5	Glutamine transport ATP-binding protein GlnQ	-2.23134	5.4188	0.161205	0.308299
ecl8_02697	ogt	Methylated-DNA--protein-cysteine methyltransferase	-2.2256	4.76529	0.268842	0.44066
ecl8_03471	cpoB	Cell division coordinator CpoB	-2.22548	5.32967	0.140396	0.280164
ecl8_04965	rraA	Regulator of ribonuclease activity A	-2.22418	7.09238	0.0786528	0.184433
ecl8_01400	ecl8_01400	hypothetical protein	-2.22009	6.34928	0.0575481	0.145172
ecl8_03884	cycB	Cyclodextrin-binding protein	-2.21606	6.83437	0.112638	0.240251
ecl8_00486	exuT_1	Hexuronate transporter	-2.21494	8.7925	1.13e-07	2.72e-06
ecl8_01794	yagG_1	Putative glycoside/cation symporter YagG	-2.21422	6.72465	0.0906657	0.204714
ecl8_05067	chrR	Quinone reductase	-2.2124	6.93206	0.00626921	0.0241457
ecl8_03187	yccS_2	Inner membrane protein YccS	-2.21232	7.26949	0.000722732	0.00393096
ecl8_04912	ydfK_2	putative membrane protein YdfK	-2.20806	9.28115	6.55e-10	4.29e-08
ecl8_03285	ydcV_3	Inner membrane ABC transporter permease protein YdcV	-2.20185	5.50455	0.187741	0.342424
ecl8_03171	yccX	Acylphosphatase	-2.19957	6.70245	0.0356199	0.10023
ecl8_04530	nfdA_3	N-substituted formamide deformylase	-2.1984	9.30178	2.87e-09	1.31e-07
ecl8_01825	zwf	Glucose-6-phosphate 1-dehydrogenase	-2.1941	4.81884	0.199286	0.356953
ecl8_03255	aat	Leucyl/phenylalanyl-tRNA--protein transferase	-2.19182	5.99698	0.102407	0.225191
ecl8_04466	ecl8_04466	hypothetical protein	-2.19057	9.54352	7.75e-10	4.73e-08
ecl8_04241	ydiM	Inner membrane transport protein YdiM	-2.19048	7.88687	3.52e-05	0.000321147
ecl8_00579	ygjV	Inner membrane protein YgjV	-2.18831	6.4123	0.114053	0.2419
ecl8_04535	pyrI	Aspartate carbamoyltransferase regulatory chain	-2.18819	6.34411	0.122961	0.254954
ecl8_02929	chbF	6-phospho-beta-glucosidase	-2.18669	7.31734	0.117302	0.246817
ecl8_05201	allB	Allantoinase	-2.18468	8.81265	9.5e-09	3.56e-07
ecl8_01342	cysT	Sulfate transport system permease protein CysT	-2.18467	6.61723	0.0870768	0.198845
ecl8_00797	ureG_2	Urease accessory protein UreG	-2.18408	7.5375	0.000383808	0.00230699
ecl8_03772	ecl8_03772	hypothetical protein	-2.18404	6.72637	0.0210265	0.0649432
ecl8_04823	dcuB	Anaerobic C4-dicarboxylate transporter DcuB	-2.18187	8.39016	1.93e-07	4.07e-06
ecl8_03197	uup	ABC transporter ATP-binding protein uup	-2.17867	6.74075	0.0197574	0.0617363
ecl8_04486	mcrB	5-methylcytosine-specific restriction enzyme B	-2.17501	10.8199	1.55e-11	2.16e-09
ecl8_00561	ecl8_00561	hypothetical protein	-2.17485	7.51215	0.000415348	0.00246337
ecl8_03765	ecl8_03765	hypothetical protein	-2.1739	8.07514	1.91e-05	0.000190519
ecl8_03213	lrp_2	Leucine-responsive regulatory protein	-2.1735	6.24778	0.105389	0.229509
ecl8_00562	ecl8_00562	hypothetical protein	-2.16961	7.30509	0.0090169	0.0325104
ecl8_00170	mtlD	Mannitol-1-phosphate 5-dehydrogenase	-2.16915	6.74334	0.0701564	0.169238
ecl8_03881	ganB	Arabinogalactan endo-beta-1,4-galactanase	-2.16908	9.23017	7.63e-09	3.01e-07
ecl8_02970	mipA	MltA-interacting protein	-2.16719	6.49823	0.059303	0.148758
ecl8_00510	ecl8_00510	hypothetical protein	-2.16686	5.46121	0.143895	0.285612
ecl8_04781	sorC_4	Sorbitol operon regulator	-2.16527	8.62358	2.75e-08	8.47e-07
ecl8_00010	dgoA_1	2-dehydro-3-deoxy-6-phosphogalactonate aldolase	-2.1634	6.62643	0.0679443	0.16505
ecl8_04907	trxA	Thioredoxin 1	-2.16221	5.07278	0.199705	0.357561
ecl8_00124	ybhF_1	putative multidrug ABC transporter ATP-binding protein YbhF	-2.1619	9.65371	1.81e-06	2.63e-05
ecl8_00792	ddpC_1	putative D,D-dipeptide transport system permease protein DdpC	-2.16161	7.48533	0.000644429	0.00357927
ecl8_01799	otsB	Trehalose-6-phosphate phosphatase	-2.1578	5.02789	0.28447	0.45724
ecl8_03447	cysA_2	Sulfate/thiosulfate import ATP-binding protein CysA	-2.15745	6.18162	0.168412	0.318406
ecl8_03885	malK_2	Maltose/maltodextrin import ATP-binding protein MalK	-2.15545	6.79487	0.0716068	0.171795
ecl8_03375	opgE	Phosphoethanolamine transferase OpgE	-2.1545	7.24408	0.00132172	0.00652812
ecl8_00468	aaeB_1	p-hydroxybenzoic acid efflux pump subunit AaeB	-2.14937	8.3675	3.9e-07	7.3e-06
ecl8_00471	bhsA_3	Multiple stress resistance protein BhsA	-2.14749	5.44233	0.175633	0.327887
ecl8_03542	shlB	Hemolysin transporter protein ShlB	-2.14691	9.20108	2.71e-09	1.25e-07
ecl8_02705	folM	Dihydromonapterin reductase	-2.14507	5.46292	0.15896	0.305455
ecl8_05007	nlhH	Carboxylesterase NlhH	-2.14034	8.31116	9.03e-05	0.000700375
ecl8_05068	ecl8_05068	hypothetical protein	-2.14003	7.39064	0.00109007	0.00556896
ecl8_00700	ecl8_00700	hypothetical protein	-2.13526	7.41613	0.00162618	0.00780446
ecl8_00810	crcB_1	Putative fluoride ion transporter CrcB	-2.13244	7.42268	0.0201721	0.0628264
ecl8_00545	ecl8_00545	hypothetical protein	-2.13238	5.38606	0.172919	0.324065
ecl8_01844	yebS	Inner membrane protein YebS	-2.12876	6.69875	0.0349578	0.0985537
ecl8_01358	ecl8_01358	hypothetical protein	-2.12816	6.63726	0.188522	0.343186
ecl8_04533	tabA	Toxin-antitoxin biofilm protein TabA	-2.12639	6.10643	0.250197	0.419502
ecl8_01351	ptsI	Phosphoenolpyruvate-protein phosphotransferase	-2.12626	5.20158	0.289091	0.460634
ecl8_03767	ecl8_03767	hypothetical protein	-2.12251	6.83826	0.0130922	0.0438373
ecl8_01047	ecl8_01047	hypothetical protein	-2.12237	4.99067	0.219143	0.381937
ecl8_04578	rafB_2	Raffinose permease	-2.12134	9.09533	2.77e-07	5.61e-06
ecl8_04543	celA_2	PTS system cellobiose-specific EIIB component	-2.12094	5.4676	0.224561	0.388272
ecl8_00487	rspB	Starvation-sensing protein RspB	-2.12004	8.31383	6.28e-05	0.000517841
ecl8_04351	fhuF	Ferric iron reductase protein FhuF	-2.11947	7.59098	0.000113494	0.000843637
ecl8_04603	ulaB_2	Ascorbate-specific PTS system EIIB component	-2.11556	5.74448	0.177745	0.330584
ecl8_04863	clcD_2	Carboxymethylenebutenolidase	-2.11539	7.60003	0.00248154	0.0112362
ecl8_02476	argE_1	Acetylornithine deacetylase	-2.11104	5.67474	0.285116	0.457627
ecl8_02250	ecl8_02250	putative transporter	-2.10658	6.6447	0.0377698	0.105021
ecl8_02493	pgrR_5	HTH-type transcriptional regulator PgrR	-2.10449	6.1269	0.134277	0.27234
ecl8_01800	otsA	Trehalose-6-phosphate synthase	-2.10305	6.87777	0.013539	0.0450626
ecl8_01219	rseB	Sigma-E factor regulatory protein RseB	-2.10199	5.7814	0.281661	0.453997
ecl8_01730	aaeB_2	p-hydroxybenzoic acid efflux pump subunit AaeB	-2.10074	8.83531	1.84e-08	6.56e-07
ecl8_04357	pobA	p-hydroxybenzoate hydroxylase	-2.09734	7.09915	0.0039156	0.0164286
ecl8_04495	ecl8_04495	hypothetical protein	-2.096	10.228	2.38e-07	4.97e-06
ecl8_00127	pyrE_1	Orotate phosphoribosyltransferase	-2.09371	7.09201	0.0102444	0.0360048
ecl8_01428	ecl8_01428	hypothetical protein	-2.09367	7.9673	2.93e-05	0.00027524
ecl8_04492	ecl8_04492	hypothetical protein	-2.09308	11.2368	1.76e-07	3.85e-06
ecl8_04908	rhlB	ATP-dependent RNA helicase RhlB	-2.08572	8.01482	4.12e-05	0.000362717
ecl8_02459	ydaF_1	Putative ribosomal N-acetyltransferase YdaF	-2.0819	4.68045	0.302508	0.475399
ecl8_03811	ecl8_03811	hypothetical protein	-2.08187	5.73015	0.153109	0.298325
ecl8_03878	lamB_2	Maltoporin	-2.08015	8.41733	4.78e-06	5.99e-05
ecl8_01767	yedI	Inner membrane protein YedI	-2.07627	6.20288	0.249585	0.419107
ecl8_04570	ecl8_04570	hypothetical protein	-2.0738	7.60198	0.000179225	0.00123546
ecl8_01448	aroC	Chorismate synthase	-2.07269	6.02944	0.192565	0.348413
ecl8_03791	ecl8_03791	hypothetical protein	-2.06578	6.21674	0.0919234	0.206661
ecl8_04353	proS_2	Proline--tRNA ligase	-2.0653	7.33296	0.00114876	0.0058221
ecl8_03202	ssuE	FMN reductase (NADPH)	-2.06211	5.75264	0.250985	0.419986
ecl8_03305	ecl8_03305	hypothetical protein	-2.06151	8.865	0.000164906	0.00115824
ecl8_03009	cydA_1	Cytochrome bd ubiquinol oxidase subunit 1	-2.06105	6.14593	0.103433	0.226465
ecl8_01293	upp	Uracil phosphoribosyltransferase	-2.05941	6.14166	0.111141	0.238077
ecl8_02007	ecl8_02007	hypothetical protein	-2.05896	8.02673	1.24e-05	0.000132712
ecl8_01300	bcp	Peroxiredoxin Bcp	-2.05742	6.67824	0.132861	0.270205
ecl8_03894	atl	DNA base-flipping protein	-2.05484	4.89875	0.308329	0.481291
ecl8_03380	glnP_1	Glutamine transport system permease protein GlnP	-2.05408	5.4271	0.170246	0.320785
ecl8_03817	ecl8_03817	hypothetical protein	-2.0536	6.11839	0.148295	0.291492
ecl8_04730	phnV_2	Putative 2-aminoethylphosphonate transport system permease protein PhnV	-2.05307	7.66099	0.00891552	0.0321969
ecl8_00502	yrbG	Inner membrane protein YrbG	-2.04818	8.11543	1.74e-05	0.00017563
ecl8_04094	dkgB	2,5-diketo-D-gluconic acid reductase B	-2.0463	5.89729	0.135326	0.273596
ecl8_03189	sulA	Cell division inhibitor SulA	-2.04491	6.67435	0.0799838	0.186573
ecl8_03748	gltA_2	Citrate synthase	-2.0439	7.02811	0.0319025	0.0918561
ecl8_04616	ecl8_04616	hypothetical protein	-2.04358	5.57662	0.302908	0.475796
ecl8_04883	cyaY	Iron-sulfur cluster assembly protein CyaY	-2.04241	5.31701	0.214832	0.376927
ecl8_00793	gsiC_1	Glutathione transport system permease protein GsiC	-2.03839	7.91	0.000172446	0.00119612
ecl8_01590	ecl8_01590	hypothetical protein	-2.03827	6.26964	0.2499	0.41932
ecl8_04867	yigL	Pyridoxal phosphate phosphatase YigL	-2.03773	7.6525	0.000134167	0.000969828
ecl8_04911	ecl8_04911	hypothetical protein	-2.03749	9.46943	3.32e-09	1.48e-07
ecl8_04474	ecl8_04474	hypothetical protein	-2.03712	7.87367	0.000554702	0.00313528
ecl8_00786	lpfC	putative outer membrane usher protein LpfC'	-2.0362	8.2858	3.34e-05	0.000308807
ecl8_02470	rhtB_2	Homoserine/homoserine lactone efflux protein	-2.03423	6.40681	0.239937	0.407287
ecl8_03533	miaB	tRNA-2-methylthio-N(6)-dimethylallyladenosine synthase	-2.03218	7.01507	0.00815022	0.029967
ecl8_03244	dmsC_2	Anaerobic dimethyl sulfoxide reductase chain C	-2.0236	5.84333	0.16127	0.308299
ecl8_03797	ecl8_03797	hypothetical protein	-2.02355	5.12733	0.211338	0.371968
ecl8_04655	hlyB	Alpha-hemolysin translocation ATP-binding protein HlyB	-2.01933	11.0367	9.23e-10	5.49e-08
ecl8_01244	xylE	D-xylose-proton symporter	-2.01772	7.35434	0.00397828	0.0166759
ecl8_05041	asnA	Aspartate--ammonia ligase	-2.01528	8.17043	5.27e-06	6.42e-05
ecl8_00121	ecl8_00121	hypothetical protein	-2.01525	8.58547	1.63e-07	3.62e-06
ecl8_04139	degP	Periplasmic serine endoprotease DegP	-2.00906	7.68218	0.000112245	0.000839751
ecl8_02486	ecl8_02486	hypothetical protein	-2.009	6.35326	0.0965735	0.214288
ecl8_02917	ecl8_02917	hypothetical protein	-2.00879	5.93478	0.14582	0.288535
ecl8_01418	ecl8_01418	hypothetical protein	-2.00779	7.15948	0.00420444	0.017395
ecl8_01473	ecl8_01473	Epimerase family protein	-2.00706	6.03972	0.16152	0.308514
ecl8_04080	fadE	Acyl-coenzyme A dehydrogenase	-2.00531	7.84588	0.000557884	0.00314559
ecl8_03259	cspD	Cold shock-like protein CspD	-2.00484	5.28146	0.20575	0.365159
ecl8_01370	nupC_1	Nucleoside permease NupC	-2.00429	6.7696	0.036954	0.103238
ecl8_04717	fimD_4	Outer membrane usher protein FimD	-2.00428	9.72339	3.61e-09	1.6e-07
ecl8_04483	ecl8_04483	hypothetical protein	-2.00273	5.41696	0.320995	0.494008
ecl8_02236	dtpA	Dipeptide and tripeptide permease A	-2.00266	7.39795	0.0010106	0.00524101
ecl8_01386	intA_4	Prophage integrase IntA	-2.00033	8.56339	2.38e-05	0.000228303
ecl8_00380	kefC_1	Glutathione-regulated potassium-efflux system protein KefC	-1.99866	8.8612	4.58e-08	1.29e-06
ecl8_00794	appA_1	Oligopeptide-binding protein AppA	-1.99845	8.32235	4.08e-05	0.000360655
ecl8_04554	ecl8_04554	hypothetical protein	-1.99801	6.14282	0.154481	0.29982
ecl8_03758	ecl8_03758	hypothetical protein	-1.99439	9.7439	2.08e-06	2.94e-05
ecl8_00424	ecl8_00424	hypothetical protein	-1.99314	6.42754	0.0829444	0.191676
ecl8_05180	ecl8_05180	hypothetical protein	-1.99259	4.80105	0.322043	0.494896
ecl8_04918	ilvA	L-threonine dehydratase biosynthetic IlvA	-1.98854	8.28794	0.00160177	0.00771476
ecl8_00800	ureC_2	Urease subunit alpha	-1.98699	8.77832	6.27e-05	0.000517841
ecl8_00444	acrF	Multidrug export protein AcrF	-1.9867	8.50825	5.86e-06	7.04e-05
ecl8_00528	argG	Argininosuccinate synthase	-1.98261	8.9218	5.41e-08	1.46e-06
ecl8_04119	rnhB	Ribonuclease HII	-1.9824	5.04673	0.320884	0.494008
ecl8_05005	vapC_1	tRNA(fMet)-specific endonuclease VapC	-1.97656	7.55791	0.00124165	0.00619437
ecl8_01291	bglK	Beta-glucoside kinase	-1.97574	6.0634	0.180868	0.334137
ecl8_04235	leuA_2	2-isopropylmalate synthase	-1.97441	8.52588	3.31e-06	4.4e-05
ecl8_00676	dkgA	2,5-diketo-D-gluconic acid reductase A	-1.97411	6.06029	0.207163	0.367082
ecl8_03754	ecl8_03754	hypothetical protein	-1.97368	9.97042	0.000113763	0.000844231
ecl8_04189	speD	S-adenosylmethionine decarboxylase proenzyme	-1.97277	6.80012	0.0274333	0.0809744
ecl8_00704	yraJ	Outer membrane usher protein YraJ	-1.97103	8.95127	3.39e-06	4.49e-05
ecl8_01211	yfiF	putative tRNA/rRNA methyltransferase YfiF	-1.97073	7.23221	0.00382225	0.0160975
ecl8_03753	ecl8_03753	hypothetical protein	-1.96941	9.44777	1.12e-05	0.000121033
ecl8_00706	intA_1	Prophage integrase IntA	-1.967	7.1716	0.0217398	0.0666388
ecl8_01439	yfdC	Inner membrane protein YfdC	-1.9658	7.43201	0.000847664	0.00450069
ecl8_01292	bglA_2	6-phospho-beta-glucosidase BglA	-1.96413	6.63684	0.0664123	0.161681
ecl8_03304	ecl8_03304	hypothetical protein	-1.96402	6.47452	0.119865	0.249734
ecl8_01383	ecl8_01383	hypothetical protein	-1.96241	7.94815	0.000112097	0.000839751
ecl8_01798	rbsC_1	Ribose import permease protein RbsC	-1.95843	5.97159	0.232	0.398429
ecl8_04561	ecl8_04561	hypothetical protein	-1.95723	7.12779	0.0363809	0.10205
ecl8_00125	ybhR_1	putative multidrug ABC transporter permease YbhR	-1.94396	9.73284	2.21e-06	3.08e-05
ecl8_01195	pheA	P-protein	-1.94111	6.93726	0.0493645	0.129103
ecl8_03803	ecl8_03803	hypothetical protein	-1.9408	6.41468	0.116599	0.245995
ecl8_04210	zapD	Cell division protein ZapD	-1.94062	6.77073	0.213401	0.374713
ecl8_04960	cytR_3	HTH-type transcriptional repressor CytR	-1.93613	7.9702	0.00012553	0.000914808
ecl8_04919	ilvD	Dihydroxy-acid dehydratase	-1.93443	8.90309	4.22e-07	7.75e-06
ecl8_03182	hspQ	Heat shock protein HspQ	-1.93425	5.01049	0.338559	0.513073
ecl8_04233	ilvI_2	Acetolactate synthase isozyme 3 large subunit	-1.93343	8.64372	3.79e-07	7.2e-06
ecl8_04922	ilvG	Acetolactate synthase isozyme 2 large subunit	-1.9332	8.83185	1.86e-07	3.98e-06
ecl8_04971	yiiM	Protein YiiM	-1.93312	7.07276	0.0421126	0.114666
ecl8_00684	ecl8_00684	hypothetical protein	-1.93177	6.23136	0.193844	0.350005
ecl8_03319	ecl8_03319	hypothetical protein	-1.93014	5.63231	0.327307	0.500442
ecl8_01486	alaA	Glutamate-pyruvate aminotransferase AlaA	-1.926	7.28532	0.0167552	0.0539555
ecl8_01299	yhhT_2	Putative transport protein YhhT	-1.92574	6.90849	0.0505124	0.131362
ecl8_04822	chbA_5	PTS system N,N'-diacetylchitobiose-specific EIIA component	-1.92494	6.2038	0.133103	0.270534
ecl8_05200	hemB_2	Delta-aminolevulinic acid dehydratase	-1.92391	9.59995	8.49e-06	9.54e-05
ecl8_02469	fruA_2	PTS system fructose-specific EIIB'BC component	-1.91585	7.62045	0.000330531	0.00203054
ecl8_00701	ecl8_00701	hypothetical protein	-1.91574	7.5241	0.0109198	0.0377831
ecl8_04462	potA_5	Spermidine/putrescine import ATP-binding protein PotA	-1.91181	6.9098	0.0274914	0.0810264
ecl8_00437	yrdA_1	Protein YrdA	-1.91169	7.25827	0.0316908	0.0914236
ecl8_00474	degS	Serine endoprotease DegS	-1.90975	6.88404	0.0281575	0.0826201
ecl8_04951	benM_2	HTH-type transcriptional regulator BenM	-1.90739	7.44058	0.00329843	0.0142135
ecl8_00678	rclR_2	RCS-specific HTH-type transcriptional activator RclR	-1.90653	6.99954	0.0147729	0.0485733
ecl8_01780	uvrY	Response regulator UvrY	-1.90616	7.04282	0.021926	0.0669521
ecl8_04494	ecl8_04494	hypothetical protein	-1.90553	8.4105	6.21e-05	0.000515516
ecl8_00100	glpK_1	Glycerol kinase	-1.9013	8.01842	0.00677971	0.0257779
ecl8_03437	ecl8_03437	hypothetical protein	-1.9013	7.58242	0.000555352	0.00313528
ecl8_04642	sugE	Quaternary ammonium compound-resistance protein SugE	-1.89792	6.10355	0.265751	0.436556
ecl8_04850	fadA	3-ketoacyl-CoA thiolase	-1.89531	7.80665	0.000362724	0.00220402
ecl8_04652	ecl8_04652	hypothetical protein	-1.89458	8.01089	5.49e-05	0.000465644
ecl8_03439	ecl8_03439	hypothetical protein	-1.89389	7.67831	0.000591328	0.00330906
ecl8_01200	clpB	Chaperone protein ClpB	-1.89343	8.71524	5.09e-07	9.08e-06
ecl8_05202	ecl8_05202	hypothetical protein	-1.89284	7.78814	0.000406824	0.00241925
ecl8_00699	elfD_1	putative fimbrial chaperone protein ElfD	-1.89229	8.13942	0.000986019	0.00512546
ecl8_04846	trkH	Trk system potassium uptake protein TrkH	-1.88773	7.22889	0.00776372	0.0287593
ecl8_04334	deoA	Thymidine phosphorylase	-1.88751	7.45255	0.00131845	0.00651915
ecl8_03868	acrB_3	Multidrug efflux pump subunit AcrB	-1.88684	8.57624	6.58e-06	7.67e-05
ecl8_03760	ecl8_03760	hypothetical protein	-1.88614	7.75548	0.000725377	0.00394054
ecl8_01286	pdeF	Cyclic di-GMP phosphodiesterase PdeF	-1.8853	8.68961	1.97e-06	2.83e-05
ecl8_03566	rna	Ribonuclease I	-1.88353	6.20088	0.218992	0.381824
ecl8_03781	ecl8_03781	hypothetical protein	-1.88299	7.29579	0.031848	0.0918134
ecl8_03203	ssuA_3	Putative aliphatic sulfonates-binding protein	-1.88223	6.6276	0.131821	0.268702
ecl8_04650	elfC	putative outer membrane usher protein ElfC	-1.88047	10.089	8.23e-06	9.29e-05
ecl8_05090	soj_1	Chromosome-partitioning ATPase Soj	-1.87929	7.50252	0.040166	0.110649
ecl8_01781	uvrC	UvrABC system protein C	-1.87874	7.78578	0.000515331	0.00295421
ecl8_00470	bhsA_2	Multiple stress resistance protein BhsA	-1.87835	5.52898	0.250865	0.419986
ecl8_04332	deoD	Purine nucleoside phosphorylase DeoD-type	-1.87757	6.13321	0.191255	0.346746
ecl8_01243	lapB_1	Lipopolysaccharide assembly protein B	-1.87734	8.55792	3.11e-05	0.000287993
ecl8_01030	ecl8_01030	hypothetical protein	-1.87681	8.21284	0.000100963	0.000764874
ecl8_02176	dmlR_9	HTH-type transcriptional regulator DmlR	-1.87574	5.89742	0.32933	0.503
ecl8_01216	nadB	L-aspartate oxidase	-1.87503	7.64091	0.00104874	0.00541362
ecl8_04782	bacC	Dihydroanticapsin 7-dehydrogenase	-1.87132	7.58241	0.0011633	0.00586915
ecl8_00982	yqcC	putative protein YqcC	-1.87131	5.77934	0.339968	0.514379
ecl8_00126	rph	Ribonuclease PH	-1.86958	7.98345	9.41e-05	0.000721261
ecl8_05099	dinG_3	putative ATP-dependent helicase DinG	-1.8692	7.62148	0.00081441	0.00435524
ecl8_01458	usg	USG-1 protein	-1.86638	5.12085	0.309316	0.481825
ecl8_03035	roxA_1	50S ribosomal protein L16 3-hydroxylase	-1.86507	5.84425	0.336219	0.510567
ecl8_00850	htrE_1	Outer membrane usher protein HtrE	-1.86464	8.82583	1.32e-06	2.04e-05
ecl8_03818	ecl8_03818	hypothetical protein	-1.86183	6.70565	0.0552435	0.141115
ecl8_05043	mioC	Protein MioC	-1.86146	7.92756	0.0270507	0.0800041
ecl8_04339	ecl8_04339	hypothetical protein	-1.85392	5.11814	0.245325	0.41398
ecl8_03180	ecl8_03180	hypothetical protein	-1.85309	4.95558	0.297296	0.46936
ecl8_03101	bssS	Biofilm regulator BssS	-1.85123	6.30914	0.126792	0.261198
ecl8_00312	ecl8_00312	hypothetical protein	-1.8498	6.80839	0.229458	0.394824
ecl8_01777	artM_1	Arginine transport ATP-binding protein ArtM	-1.84829	6.10335	0.152754	0.297763
ecl8_04728	pdeC	putative cyclic di-GMP phosphodiesterase PdeC	-1.84617	9.70342	5e-08	1.38e-06
ecl8_04871	rhtC_3	Threonine efflux protein	-1.84538	7.26178	0.00878958	0.0318971
ecl8_04640	frdD	Fumarate reductase subunit D	-1.84534	5.55415	0.235851	0.4021
ecl8_01589	mglC	Galactoside transport system permease protein MglC	-1.84507	7.30783	0.0443364	0.119121
ecl8_01430	ecl8_01430	hypothetical protein	-1.84151	5.62018	0.306357	0.479253
ecl8_02848	pgrR_11	HTH-type transcriptional regulator PgrR	-1.84068	4.97141	0.234635	0.401101
ecl8_04258	rluA_2	Ribosomal large subunit pseudouridine synthase A	-1.83951	6.4664	0.112879	0.24042
ecl8_02844	ecl8_02844	hypothetical protein	-1.8386	4.81668	0.288313	0.460176
ecl8_04767	malF_2	Maltose transport system permease protein MalF	-1.83829	8.18166	0.000460677	0.00267877
ecl8_01756	erfK	putative L,D-transpeptidase ErfK/SrfK	-1.83731	6.73695	0.0607483	0.151277
ecl8_03824	traR	Protein TraR	-1.83187	4.86613	0.364421	0.535349
ecl8_03543	cdiA	tRNA nuclease CdiA	-1.82812	9.50913	8.33e-08	2.08e-06
ecl8_03515	chiQ	putative lipoprotein ChiQ	-1.8263	5.65281	0.281125	0.453772
ecl8_03331	ecl8_03331	hypothetical protein	-1.82254	4.59351	0.361926	0.533616
ecl8_00142	rfaQ	Lipopolysaccharide core heptosyltransferase RfaQ	-1.82233	6.01309	0.255322	0.424426
ecl8_02523	iolT	Major myo-inositol transporter IolT	-1.82153	7.82871	0.000209231	0.00140116
ecl8_05014	glnL	Sensory histidine kinase/phosphatase NtrB	-1.81791	7.47799	0.00156457	0.00755194
ecl8_00688	ecl8_00688	hypothetical protein	-1.81692	6.8868	0.0466294	0.123496
ecl8_04317	creD	Inner membrane protein CreD	-1.81624	7.55751	0.0418825	0.114109
ecl8_03446	ybhA	Pyridoxal phosphate phosphatase YbhA	-1.81226	5.20324	0.369244	0.539687
ecl8_04461	glpQ1	putative glycerophosphodiester phosphodiesterase 1	-1.81148	8.0359	0.00080487	0.00431457
ecl8_01796	araF	L-arabinose-binding periplasmic protein	-1.80702	6.56107	0.0950684	0.211897
ecl8_03188	sxy	Protein Sxy	-1.80614	5.79305	0.261714	0.432152
ecl8_03487	sdhA	Succinate dehydrogenase flavoprotein subunit	-1.80269	7.39974	0.00329749	0.0142135
ecl8_04874	ecl8_04874	hypothetical protein	-1.80269	7.40675	0.0024935	0.0112789
ecl8_04739	ecl8_04739	Mono(2-hydroxyethyl) terephthalate hydrolase	-1.80013	8.75415	1.63e-06	2.42e-05
ecl8_01434	ecl8_01434	hypothetical protein	-1.79981	5.6997	0.360489	0.531674
ecl8_04266	pdxA	4-hydroxythreonine-4-phosphate dehydrogenase	-1.7997	6.87094	0.0435009	0.117513
ecl8_00217	ecl8_00217	hypothetical protein	-1.79702	4.43476	0.36931	0.539687
ecl8_04363	mdoB	Phosphoglycerol transferase I	-1.79449	8.77103	2.89e-06	3.91e-05
ecl8_00128	gnl	Gluconolactonase	-1.79338	8.0589	0.000194974	0.00133577
ecl8_02242	rsxC	Electron transport complex subunit RsxC	-1.79117	6.16098	0.166948	0.316307
ecl8_01301	gcvR	Glycine cleavage system transcriptional repressor	-1.791	7.00183	0.0216985	0.0666083
ecl8_04772	ecl8_04772	hypothetical protein	-1.79061	5.86483	0.355135	0.527791
ecl8_01470	hisM	Histidine transport system permease protein HisM	-1.78973	6.24675	0.174703	0.326424
ecl8_00383	slyX	Protein SlyX	-1.78925	5.79561	0.359695	0.53103
ecl8_02884	yciH	putative protein YciH	-1.78808	5.64544	0.265558	0.436399
ecl8_03309	ecl8_03309	hypothetical protein	-1.78666	6.09119	0.183402	0.337788
ecl8_04467	ecl8_04467	hypothetical protein	-1.78601	7.32278	0.00662234	0.0252657
ecl8_00870	sugC	Trehalose import ATP-binding protein SugC	-1.78262	6.92096	0.234334	0.400741
ecl8_04527	argI	Ornithine carbamoyltransferase subunit I	-1.78103	7.44065	0.00272974	0.0121746
ecl8_04352	licC_5	Lichenan permease IIC component	-1.78087	8.12625	5.95e-05	0.000497726
ecl8_03036	pepT	Peptidase T	-1.77891	5.97533	0.178898	0.331899
ecl8_04083	cmpR_3	HTH-type transcriptional activator CmpR	-1.77859	7.08451	0.0174515	0.055675
ecl8_04574	tamB	Translocation and assembly module subunit TamB	-1.77796	8.97464	2.01e-06	2.87e-05
ecl8_01790	ftnA_1	Bacterial non-heme ferritin	-1.7774	7.90803	0.000364551	0.0022091
ecl8_00568	yqjF	Inner membrane protein YqjF	-1.7768	5.32455	0.374417	0.545097
ecl8_04239	ecl8_04239	NADH oxidase	-1.77218	9.38411	3.29e-07	6.41e-06
ecl8_02487	ygaU	putative protein YgaU	-1.77125	5.31938	0.378193	0.54782
ecl8_04482	ecl8_04482	hypothetical protein	-1.76804	8.40624	2.4e-05	0.000228975
ecl8_01824	hexR_1	HTH-type transcriptional regulator HexR	-1.76738	6.2306	0.16568	0.314708
ecl8_01246	hcaT	putative 3-phenylpropionic acid transporter	-1.76653	6.98091	0.0265728	0.0787534
ecl8_03459	aroG	Phospho-2-dehydro-3-deoxyheptonate aldolase, Phe-sensitive	-1.76273	5.8101	0.248991	0.418424
ecl8_03761	ecl8_03761	hypothetical protein	-1.75348	8.13255	0.000705249	0.00384524
ecl8_03511	ybfE	putative protein YbfE	-1.75173	4.77416	0.312961	0.485836
ecl8_00576	exuT_2	Hexuronate transporter	-1.75159	7.56725	0.00152265	0.00738956
ecl8_00462	rng	Ribonuclease G	-1.75008	7.58374	0.00449842	0.0183223
ecl8_03851	fsr	Fosmidomycin resistance protein	-1.74666	6.69348	0.157402	0.302984
ecl8_03292	ecl8_03292	hypothetical protein	-1.74629	5.02668	0.386018	0.556086
ecl8_04848	pepQ	Xaa-Pro dipeptidase	-1.74481	8.66081	1.31e-05	0.000138811
ecl8_05091	ecl8_05091	hypothetical protein	-1.74034	7.16577	0.024807	0.0744043
ecl8_00365	codA_1	Cytosine deaminase	-1.73947	8.14027	0.000164195	0.00115507
ecl8_04809	ecl8_04809	hypothetical protein	-1.73918	6.10985	0.349162	0.522221
ecl8_04047	accB_3	Biotin carboxyl carrier protein of acetyl-CoA carboxylase	-1.73682	8.03066	0.00126918	0.00631052
ecl8_02658	ecl8_02658	hypothetical protein	-1.73571	5.77252	0.313338	0.486251
ecl8_01281	betC	Choline-sulfatase	-1.73549	8.84629	2.53e-06	3.47e-05
ecl8_02527	besA	Ferri-bacillibactin esterase BesA	-1.73472	5.94297	0.217442	0.379566
ecl8_00689	gss	Bifunctional glutathionylspermidine synthetase/amidase	-1.73341	8.10277	0.000226231	0.00149297
ecl8_03461	zitB	Zinc transporter ZitB	-1.73298	5.86281	0.200482	0.358235
ecl8_01482	ecl8_01482	hypothetical protein	-1.73265	6.06685	0.275655	0.448203
ecl8_03290	rimK	Ribosomal protein S6--L-glutamate ligase	-1.73231	6.28519	0.156488	0.302136
ecl8_04741	fepA_2	Ferrienterobactin receptor	-1.73076	9.37447	1.48e-06	2.23e-05
ecl8_00581	alx	Putative membrane-bound redox modulator Alx	-1.72801	7.22666	0.0764771	0.180279
ecl8_05006	ecl8_05006	hypothetical protein	-1.72741	6.13817	0.172954	0.324065
ecl8_04435	roxA_2	50S ribosomal protein L16 3-hydroxylase	-1.72675	7.86368	0.000441244	0.00259967
ecl8_01391	ecl8_01391	hypothetical protein	-1.72559	6.12631	0.237794	0.404486
ecl8_02703	ydgH	Protein YdgH	-1.72542	5.85169	0.31461	0.487548
ecl8_02214	soxS_1	Regulatory protein SoxS	-1.72354	5.15288	0.304084	0.476869
ecl8_04872	recQ	ATP-dependent DNA helicase RecQ	-1.72197	8.49011	0.000202079	0.0013718
ecl8_05277	ecl8_05277	hypothetical protein	-1.71933	9.21271	8.7e-07	1.44e-05
ecl8_01977	rssB	Regulator of RpoS	-1.71865	7.63406	0.00124752	0.00621671
ecl8_04547	relB	Antitoxin RelB	-1.71799	5.46324	0.282122	0.454575
ecl8_03752	ecl8_03752	hypothetical protein	-1.71559	8.46743	0.000543274	0.00307878
ecl8_04591	fklB	FKBP-type 22 kDa peptidyl-prolyl cis-trans isomerase	-1.7152	6.89184	0.1085	0.234112
ecl8_04355	yjjQ	Putative transcription factor YjjQ	-1.71343	9.55732	1.33e-06	2.04e-05
ecl8_00450	panF	Sodium/pantothenate symporter	-1.71256	7.05329	0.0198541	0.0619659
ecl8_04459	xynB	Beta-xylosidase	-1.7124	9.45811	1.44e-05	0.000150034
ecl8_04091	ecl8_04091	hypothetical protein	-1.71221	6.42212	0.129828	0.265732
ecl8_01578	cmpR_2	HTH-type transcriptional activator CmpR	-1.71053	5.99079	0.31136	0.484024
ecl8_04324	trpR	Trp operon repressor	-1.70826	5.3187	0.395361	0.56444
ecl8_01602	pbpG	D-alanyl-D-alanine endopeptidase	-1.70821	6.27727	0.221694	0.384879
ecl8_03186	yccF	Inner membrane protein YccF	-1.70738	5.61755	0.389021	0.559147
ecl8_02210	purR	HTH-type transcriptional repressor PurR	-1.70722	5.71984	0.221453	0.384761
ecl8_01843	ecl8_01843	hypothetical protein	-1.7072	7.51457	0.0126618	0.042588
ecl8_00745	ecl8_00745	26 kDa periplasmic immunogenic protein	-1.70696	5.82736	0.319787	0.49283
ecl8_04648	ecl8_04648	hypothetical protein	-1.70374	9.6063	4.5e-05	0.000392186
ecl8_02843	ymcF	Protein YmcF	-1.70196	5.42927	0.400684	0.569181
ecl8_03674	nfsB	Oxygen-insensitive NAD(P)H nitroreductase	-1.69893	6.10223	0.289918	0.461012
ecl8_04586	qorB	Quinone oxidoreductase 2	-1.69812	7.35983	0.191168	0.346729
ecl8_01771	rcsA_1	Transcriptional regulatory protein RcsA	-1.69561	7.26688	0.02553	0.076214
ecl8_00527	ecl8_00527	hypothetical protein	-1.69425	10.2123	3.31e-07	6.43e-06
ecl8_01848	htpX	Protease HtpX	-1.69055	5.25032	0.34152	0.515284
ecl8_01841	yebV	putative protein YebV	-1.69016	4.38456	0.404992	0.573781
ecl8_01874	minD	Septum site-determining protein MinD	-1.68906	5.90046	0.271178	0.443807
ecl8_01290	purM	Phosphoribosylformylglycinamidine cyclo-ligase	-1.68822	6.64849	0.0996512	0.219696
ecl8_00849	yadV_1	putative fimbrial chaperone YadV	-1.68734	9.05493	4.38e-06	5.55e-05
ecl8_03007	ecl8_03007	hypothetical protein	-1.68719	4.96307	0.403211	0.57197
ecl8_00193	ecl8_00193	hypothetical protein	-1.68684	9.63507	5.94e-07	1.05e-05
ecl8_04487	ecl8_04487	hypothetical protein	-1.68612	10.1995	0.000305281	0.00190427
ecl8_03867	acrA	Multidrug efflux pump subunit AcrA	-1.68488	7.2392	0.0585967	0.147235
ecl8_04579	bgaA	Beta-galactosidase BgaA	-1.68467	9.27633	1.7e-05	0.000172787
ecl8_03102	solA	N-methyl-L-tryptophan oxidase	-1.68317	6.32803	0.141928	0.282841
ecl8_04204	nadC	Nicotinate-nucleotide pyrophosphorylase [carboxylating]	-1.6804	7.36757	0.041135	0.112692
ecl8_04484	ecl8_04484	hypothetical protein	-1.68023	8.3018	0.000735347	0.00398499
ecl8_04854	tatD	3'-5' ssDNA/RNA exonuclease TatD	-1.67921	7.43022	0.00642882	0.0245894
ecl8_04291	rihC	Non-specific ribonucleoside hydrolase RihC	-1.67893	6.72666	0.216355	0.378261
ecl8_00852	ecl8_00852	hypothetical protein	-1.67856	7.91781	0.00165497	0.00792821
ecl8_00005	yidA	Sugar phosphatase YidA	-1.67784	7.80546	0.00074261	0.00401946
ecl8_03379	glnH_2	Glutamine-binding periplasmic protein	-1.67647	5.97043	0.384772	0.555007
ecl8_03435	bepE_2	Efflux pump membrane transporter BepE	-1.67613	8.26797	0.000535766	0.00304397
ecl8_01636	gci	D-galactarolactone cycloisomerase	-1.67518	6.62147	0.0944772	0.211161
ecl8_00855	ycgR	Flagellar brake protein YcgR	-1.67483	7.23831	0.0268557	0.0794801
ecl8_03880	bglY	Beta-galactosidase BglY	-1.67401	8.85822	6.28e-05	0.000517841
ecl8_03010	ecl8_03010	Manganese catalase	-1.6696	6.41272	0.193915	0.350005
ecl8_04480	ecl8_04480	hypothetical protein	-1.66885	8.18872	0.000333887	0.00204552
ecl8_04936	yijD	Inner membrane protein YijD	-1.66808	6.87809	0.061821	0.153301
ecl8_03172	rep_1	ATP-dependent DNA helicase Rep	-1.66652	7.27152	0.010274	0.0360519
ecl8_00382	slyD	FKBP-type peptidyl-prolyl cis-trans isomerase SlyD	-1.66632	7.19703	0.027464	0.0810115
ecl8_03809	ecl8_03809	hypothetical protein	-1.66624	6.75166	0.0697081	0.168508
ecl8_01830	yebE	Inner membrane protein YebE	-1.66529	5.28661	0.40761	0.574934
ecl8_04302	ecl8_04302	hypothetical protein	-1.66253	7.45894	0.0187587	0.0591262
ecl8_04364	rpnA_4	Recombination-promoting nuclease RpnA	-1.66205	7.29362	0.0493833	0.129103
ecl8_04572	ecl8_04572	hypothetical protein	-1.66188	8.99374	1.22e-05	0.000131309
ecl8_05069	yidZ	HTH-type transcriptional regulator YidZ	-1.6614	7.68809	0.00545057	0.0214938
ecl8_01414	ecl8_01414	hypothetical protein	-1.65744	9.24875	2.21e-05	0.000214651
ecl8_03871	maa	Maltose O-acetyltransferase	-1.65407	6.79214	0.0601948	0.150234
ecl8_00564	yhaK	Pirin-like protein YhaK	-1.65211	6.87805	0.0476571	0.125621
ecl8_03749	ecl8_03749	hypothetical protein	-1.6519	5.2121	0.26453	0.435352
ecl8_04943	argE_3	Acetylornithine deacetylase	-1.65133	8.24212	0.000146143	0.00103625
ecl8_03195	pqiB	Paraquat-inducible protein B	-1.64717	6.69825	0.0893888	0.202578
ecl8_03750	hiuH	5-hydroxyisourate hydrolase	-1.64699	7.13929	0.0306589	0.0887913
ecl8_01422	ecl8_01422	hypothetical protein	-1.64579	6.34525	0.188266	0.342862
ecl8_02222	ydhF	Oxidoreductase YdhF	-1.63763	5.47582	0.41912	0.58598
ecl8_01191	ecl8_01191	hypothetical protein	-1.63537	6.21437	0.176559	0.329065
ecl8_04201	ecl8_04201	Extracellular exo-alpha-(1->5)-L-arabinofuranosidase	-1.63522	7.17207	0.0456167	0.121463
ecl8_04764	lamB_4	Maltoporin	-1.63425	8.01411	0.00044893	0.00262759
ecl8_01468	hisJ_1	Histidine-binding periplasmic protein	-1.63174	6.50472	0.123241	0.255416
ecl8_04917	oxyR_5	Hydrogen peroxide-inducible genes activator	-1.62749	7.45365	0.00714247	0.0268431
ecl8_04769	psiE	Protein PsiE	-1.62719	8.18558	0.0010716	0.00549979
ecl8_00542	yhbU	putative protease YhbU	-1.62447	7.54154	0.00364501	0.0154324
ecl8_04775	fdtC	dTDP-3-amino-3,6-dideoxy-alpha-D-galactopyranose 3-N-acetyltransferase	-1.62345	5.63399	0.253502	0.422347
ecl8_04469	ecl8_04469	hypothetical protein	-1.62232	8.61535	3.03e-05	0.000283139
ecl8_04770	ecl8_04770	hypothetical protein	-1.62215	9.72924	1.06e-05	0.000115872
ecl8_03902	sbnA	putative siderophore biosynthesis protein SbnA	-1.62099	5.66842	0.256737	0.425811
ecl8_00379	ywrO_1	General stress protein 14	-1.62051	7.71788	0.00530185	0.0210376
ecl8_04719	ycbV	putative fimbrial-like protein YcbV	-1.61981	8.842	4.02e-05	0.000357739
ecl8_04600	ulaE	L-ribulose-5-phosphate 3-epimerase UlaE	-1.61962	7.17894	0.0830277	0.191676
ecl8_01853	cspC	Cold shock-like protein CspC	-1.61841	6.80161	0.144767	0.286578
ecl8_01415	ecl8_01415	hypothetical protein	-1.61726	6.70706	0.0892771	0.202552
ecl8_04330	ytjB	putative inner membrane protein Smp	-1.61434	6.75446	0.189475	0.34464
ecl8_04869	rhtB_3	Homoserine/homoserine lactone efflux protein	-1.6108	7.26645	0.0123872	0.0418536
ecl8_04245	setA	Sugar efflux transporter A	-1.61074	7.59744	0.00284667	0.0125954
ecl8_01377	ypdB	Transcriptional regulatory protein YpdB	-1.60875	7.03805	0.215173	0.377099
ecl8_00540	limB_1	Limonene 1,2-monooxygenase	-1.60796	7.1164	0.175883	0.32808
ecl8_04724	ghxP	Guanine/hypoxanthine permease GhxP	-1.60785	7.62194	0.00845965	0.0308819
ecl8_04208	guaC	GMP reductase	-1.6057	7.31077	0.0100881	0.0356369
ecl8_03908	ppiD	Peptidyl-prolyl cis-trans isomerase D	-1.60549	7.29628	0.0158974	0.0516405
ecl8_03900	yheI	putative multidrug resistance ABC transporter ATP-binding/permease protein YheI	-1.60503	7.51773	0.0425093	0.115534
ecl8_01485	yfbR	5'-deoxynucleotidase YfbR	-1.60478	6.60596	0.184483	0.338878
ecl8_05022	srkA_2	Stress response kinase A	-1.60392	7.61213	0.00766895	0.0284555
ecl8_04465	ecl8_04465	hypothetical protein	-1.6008	8.3266	0.000112406	0.000839751
ecl8_05078	ecl8_05078	hypothetical protein	-1.59971	5.43597	0.342114	0.515831
ecl8_03821	ecl8_03821	hypothetical protein	-1.59893	6.74128	0.0848941	0.194467
ecl8_04044	ribN	Riboflavin transporter	-1.59505	6.88167	0.0506984	0.131768
ecl8_00780	nodD2_1	Nodulation protein D 2	-1.59444	7.39175	0.00805285	0.0296579
ecl8_04178	manX_2	PTS system mannose-specific EIIAB component	-1.59399	5.50864	0.422296	0.589312
ecl8_04488	ecl8_04488	putative type I restriction enzymeP M protein	-1.59266	10.3813	3.39e-06	4.49e-05
ecl8_05185	pcoC	Copper resistance protein C	-1.59208	6.37705	0.29146	0.462602
ecl8_01432	ecl8_01432	hypothetical protein	-1.58812	8.66279	0.000512701	0.00294292
ecl8_00559	garR	2-hydroxy-3-oxopropionate reductase	-1.58588	6.27678	0.179802	0.333022
ecl8_02002	ecl8_02002	hypothetical protein	-1.58494	8.54244	5.88e-05	0.000493891
ecl8_01026	xerC_2	Tyrosine recombinase XerC	-1.58439	7.10597	0.0344102	0.0975029
ecl8_04870	rpnA_6	Recombination-promoting nuclease RpnA	-1.58017	8.1158	0.00049237	0.00283717
ecl8_04681	stbB	Protein StbB	-1.57846	4.97673	0.433522	0.600429
ecl8_02228	dgcT	putative diguanylate cyclase DgcT	-1.57651	7.04181	0.032847	0.093969
ecl8_04124	skp	Chaperone protein Skp	-1.57579	4.65513	0.296581	0.468674
ecl8_03509	seqA	Negative modulator of initiation of replication	-1.57566	4.41177	0.431405	0.598511
ecl8_04789	ecl8_04789	hypothetical protein	-1.57457	8.45659	0.0429859	0.116333
ecl8_04660	yjeH	L-methionine/branched-chain amino acid exporter YjeH	-1.57456	7.89698	0.00694779	0.0262603
ecl8_04371	dgaR_2	Transcriptional regulatory protein DagR	-1.57228	8.88517	1.82e-05	0.000182351
ecl8_03916	ampG	Protein AmpG	-1.57169	8.62731	9.35e-05	0.0007184
ecl8_04751	qorA	Quinone oxidoreductase 1	-1.56955	7.45954	0.00600178	0.0232562
ecl8_04787	yggP	Mannitol-1-phosphate 5-dehydrogenase	-1.56814	7.76536	0.00460432	0.0186345
ecl8_01741	ecl8_01741	hypothetical protein	-1.56669	4.74029	0.320102	0.493145
ecl8_02483	rbsK_1	Ribokinase	-1.56649	6.97119	0.0460293	0.12227
ecl8_01464	cvpA	Colicin V production protein	-1.5656	5.72288	0.261098	0.431614
ecl8_04200	yicJ_2	Inner membrane symporter YicJ	-1.56475	7.83253	0.00152034	0.00738642
ecl8_03958	ulaC_2	Ascorbate-specific PTS system EIIA component	-1.56372	7.57449	0.00552851	0.0217435
ecl8_03444	ariR	putative two-component-system connector protein AriR	-1.56219	5.4081	0.434143	0.600769
ecl8_01766	yedA_1	putative inner membrane transporter YedA	-1.56074	6.34965	0.371964	0.542675
ecl8_04531	frlD	Fructosamine kinase FrlD	-1.55924	8.75599	8.9e-05	0.000691614
ecl8_01737	ecl8_01737	putative transporter	-1.55822	7.63679	0.00772284	0.0286317
ecl8_03798	ecl8_03798	hypothetical protein	-1.55817	6.09327	0.407269	0.574634
ecl8_02471	ecl8_02471	hypothetical protein	-1.55745	7.15247	0.0462851	0.122876
ecl8_00377	ecl8_00377	hypothetical protein	-1.55628	7.70571	0.0032757	0.0141566
ecl8_00461	yhdE	Maf-like protein YhdE	-1.55582	7.2145	0.0618361	0.153301
ecl8_02643	speG_2	Spermidine N(1)-acetyltransferase	-1.55491	5.71007	0.291415	0.462602
ecl8_01245	yphB	putative protein YphB	-1.55393	6.07698	0.309104	0.481693
ecl8_00431	dprA	DNA processing protein DprA	-1.55359	8.00431	0.000789029	0.00425008
ecl8_04771	ygaZ_2	Inner membrane protein YgaZ	-1.5506	9.14438	6.54e-05	0.000535028
ecl8_03011	yciE_2	Protein YciE	-1.54912	5.92814	0.246123	0.414956
ecl8_01839	pphA	Serine/threonine-protein phosphatase 1	-1.54829	6.70591	0.103727	0.226999
ecl8_00557	garP	putative galactarate transporter	-1.54758	8.74998	0.00101627	0.00526431
ecl8_02423	pgdA	Peptidoglycan deacetylase	-1.5417	5.99817	0.288384	0.460176
ecl8_05037	rbsD	D-ribose pyranase	-1.53791	6.92669	0.0573545	0.14493
ecl8_00740	epd	D-erythrose-4-phosphate dehydrogenase	-1.53671	6.36167	0.318544	0.491593
ecl8_04238	leuD1	3-isopropylmalate dehydratase small subunit 1	-1.53308	8.09835	0.00371097	0.0156584
ecl8_05038	kup	Low affinity potassium transport system protein kup	-1.53269	9.79493	3.77e-06	4.84e-05
ecl8_02845	ytbE	putative oxidoreductase YtbE	-1.53266	6.35081	0.342753	0.516532
ecl8_03376	ompX	Outer membrane protein X	-1.52969	5.80811	0.374724	0.545097
ecl8_00019	aspT_1	Aspartate/alanine antiporter	-1.52305	8.5811	0.000203543	0.00137964
ecl8_03779	ecl8_03779	hypothetical protein	-1.52121	8.49157	0.000554738	0.00313528
ecl8_01788	tyrP_2	Tyrosine-specific transport protein	-1.51861	5.9097	0.433746	0.600429
ecl8_04532	frlB_3	Fructosamine deglycase FrlB	-1.51839	9.05276	2.29e-05	0.000220327
ecl8_04740	soxS_4	Regulatory protein SoxS	-1.51558	7.59483	0.00992892	0.0352571
ecl8_01028	ecl8_01028	hypothetical protein	-1.51321	7.33849	0.014893	0.0488762
ecl8_04356	araC_3	Arabinose operon regulatory protein	-1.51258	8.51361	0.000342026	0.0020925
ecl8_02170	ecl8_02170	hypothetical protein	-1.51228	5.84918	0.438194	0.604126
ecl8_03064	comR	HTH-type transcriptional repressor ComR	-1.51097	6.13022	0.285753	0.458109
ecl8_03005	ecl8_03005	hypothetical protein	-1.51065	6.63626	0.199097	0.356759
ecl8_00375	cfxP	Phosphoribulokinase, plasmid	-1.50883	7.61703	0.00455834	0.0184652
ecl8_03369	ybiS	putative L,D-transpeptidase YbiS	-1.50864	6.73758	0.203911	0.362617
ecl8_03264	lysO	Lysine exporter LysO	-1.50674	8.72933	0.000233804	0.00153348
ecl8_04290	yhaI	Inner membrane protein YhaI	-1.50636	5.46667	0.373249	0.543838
ecl8_03296	ecl8_03296	hypothetical protein	-1.50584	6.94984	0.0637451	0.156814
ecl8_01823	pykA	Pyruvate kinase II	-1.50443	6.63161	0.13101	0.267538
ecl8_04438	cusS_1	Sensor kinase CusS	-1.50388	8.62307	0.0106044	0.0370074
ecl8_01579	lysP	Lysine-specific permease	-1.5037	7.43332	0.012917	0.0433482
ecl8_04180	yadG	putative ABC transporter ATP-binding protein YadG	-1.50347	6.97733	0.0504997	0.131362
ecl8_05217	yciC_3	Putative metal chaperone YciC	-1.50124	6.80479	0.108964	0.23466
ecl8_02192	ecl8_02192	hypothetical protein	-1.50039	6.7435	0.116767	0.246232
ecl8_03757	ecl8_03757	hypothetical protein	-1.49819	6.52207	0.26698	0.438253
ecl8_04864	metE_2	5-methyltetrahydropteroyltriglutamate-- homocysteine methyltransferase	-1.49812	9.09002	0.000261561	0.00167851
ecl8_00848	ecl8_00848	hypothetical protein	-1.49785	10.035	6.63e-06	7.67e-05
ecl8_03323	ecl8_03323	hypothetical protein	-1.49629	5.30354	0.377047	0.546978
ecl8_05035	rbsC_10	Ribose import permease protein RbsC	-1.49597	7.84564	0.00513576	0.0204696
ecl8_03805	ecl8_03805	hypothetical protein	-1.49456	5.41089	0.453998	0.618458
ecl8_04812	nudC	NADH pyrophosphatase	-1.49034	7.02639	0.044605	0.119554
ecl8_04792	aceK	Isocitrate dehydrogenase kinase/phosphatase	-1.48608	8.44214	0.000165765	0.00116244
ecl8_03933	panE	2-dehydropantoate 2-reductase	-1.48318	6.44738	0.224746	0.388364
ecl8_05100	ecl8_05100	hypothetical protein	-1.48086	6.45489	0.207713	0.367821
ecl8_03112	betI_2	HTH-type transcriptional regulator BetI	-1.47945	5.04065	0.46905	0.629627
ecl8_02504	pgrR_7	HTH-type transcriptional regulator PgrR	-1.47908	5.91327	0.365188	0.535915
ecl8_04493	ecl8_04493	hypothetical protein	-1.47873	8.62327	0.00147288	0.0071793
ecl8_04813	rsd	Regulator of sigma D	-1.47736	7.40069	0.0166563	0.0536755
ecl8_04485	ecl8_04485	hypothetical protein	-1.47705	6.91909	0.10602	0.230462
ecl8_04470	appA_4	Periplasmic AppA protein	-1.47527	10.1356	0.0014061	0.00689904
ecl8_04045	gdhA_3	Glutamate dehydrogenase	-1.47508	7.00317	0.0567327	0.143927
ecl8_01189	ecl8_01189	Outer membrane protein Omp38	-1.47136	5.62771	0.456984	0.619979
ecl8_01108	yqaB	Fructose-1-phosphate phosphatase YqaB	-1.47099	6.35272	0.197414	0.354883
ecl8_00329	malP_4	Maltodextrin phosphorylase	-1.47087	8.91165	6.49e-05	0.000532438
ecl8_02573	ecl8_02573	putative signaling protein	-1.46743	7.00609	0.0570167	0.144322
ecl8_03291	nfsA	Oxygen-insensitive NADPH nitroreductase	-1.46713	6.50702	0.162361	0.309721
ecl8_03177	ecl8_03177	hypothetical protein	-1.4646	5.42659	0.464109	0.626112
ecl8_03113	ymdB	O-acetyl-ADP-ribose deacetylase	-1.46454	5.02779	0.392394	0.561642
ecl8_00003	recF_1	DNA replication and repair protein RecF	-1.46403	7.42432	0.0114938	0.0393842
ecl8_04187	fkpA_2	FKBP-type peptidyl-prolyl cis-trans isomerase FkpA	-1.46288	9.2198	7.1e-05	0.000573908
ecl8_04785	sorA	PTS system sorbose-specific EIIC component	-1.46254	8.39696	0.000241562	0.0015774
ecl8_00819	ecl8_00819	hypothetical protein	-1.46136	8.18465	0.000674322	0.00371293
ecl8_05010	ecl8_05010	hypothetical protein	-1.46095	7.76012	0.00883549	0.0320116
ecl8_02503	ecl8_02503	hypothetical protein	-1.46076	4.92627	0.474689	0.634246
ecl8_03326	ecl8_03326	hypothetical protein	-1.45992	7.66124	0.0144237	0.047601
ecl8_05070	mdtL	Multidrug resistance protein MdtL	-1.45984	8.36022	0.0009713	0.00505484
ecl8_04656	ecl8_04656	hypothetical protein	-1.45795	9.55845	0.00180286	0.00859973
ecl8_03276	artP	Arginine transport ATP-binding protein ArtP	-1.45689	5.97501	0.268018	0.439632
ecl8_01297	yfgD	putative protein YfgD	-1.45623	5.63789	0.466244	0.627664
ecl8_04910	pcpR_3	PCP degradation transcriptional activation protein	-1.4526	8.65539	9.35e-05	0.0007184
ecl8_04893	yifK	putative transport protein YifK	-1.44817	8.411	0.000303192	0.00189389
ecl8_00738	loiP	Metalloprotease LoiP	-1.44698	6.95836	0.0763599	0.180228
ecl8_03675	levD	PTS system fructose-specific EIIA component	-1.43989	5.79797	0.308801	0.481389
ecl8_03516	chiP	Chitoporin	-1.43969	8.06246	0.00363933	0.0154291
ecl8_00711	nupG_2	Nucleoside permease NupG	-1.43764	7.06557	0.0657571	0.160436
ecl8_03436	ecl8_03436	hypothetical protein	-1.43641	7.76772	0.00415529	0.0172435
ecl8_00565	yhaJ_1	HTH-type transcriptional regulator YhaJ	-1.43479	7.45139	0.0369666	0.103238
ecl8_03127	efeB	Deferrochelatase/peroxidase EfeB	-1.43457	6.06767	0.447629	0.613304
ecl8_02195	gloB_1	Hydroxyacylglutathione hydrolase	-1.43308	5.56158	0.319088	0.492094
ecl8_05101	ecl8_05101	hypothetical protein	-1.42961	6.22705	0.267757	0.439366
ecl8_04108	ecl8_04108	hypothetical protein	-1.4278	7.21997	0.052418	0.135292
ecl8_00560	garK_1	Glycerate 2-kinase	-1.42661	6.91614	0.0847029	0.194229
ecl8_03271	auaH_2	Aurachin B dehydrogenase	-1.423	6.55957	0.168036	0.317828
ecl8_04236	leuB	3-isopropylmalate dehydrogenase	-1.42222	7.73543	0.0217349	0.0666388
ecl8_01880	dsbB	Disulfide bond formation protein B	-1.42153	5.43279	0.475386	0.634797
ecl8_00658	tolC	Outer membrane protein TolC	-1.42149	8.30743	0.00472211	0.0190594
ecl8_03302	ecl8_03302	hypothetical protein	-1.41923	7.42687	0.0273954	0.0809161
ecl8_01230	pgpC	Phosphatidylglycerophosphatase C	-1.41911	6.40208	0.328983	0.502659
ecl8_03565	dcuD	Putative cryptic C4-dicarboxylate transporter DcuD	-1.41858	7.39748	0.0179385	0.0569031
ecl8_00394	bfr	Bacterioferritin	-1.41825	8.62721	0.00822963	0.030234
ecl8_00457	csrD	RNase E specificity factor CsrD	-1.41491	7.83671	0.00399396	0.0167259
ecl8_01376	glk	Glucokinase	-1.4133	6.72622	0.248466	0.417857
ecl8_00996	lgrD	Linear gramicidin synthase subunit D	-1.41292	7.71536	0.0180891	0.0572992
ecl8_00456	msrP	Protein-methionine-sulfoxide reductase catalytic subunit MsrP	-1.41098	7.02832	0.0833241	0.19192
ecl8_04546	nrdG	Anaerobic ribonucleoside-triphosphate reductase-activating protein	-1.41053	6.21527	0.242326	0.409694
ecl8_04312	thrC	Threonine synthase	-1.41043	8.43686	0.0381412	0.10579
ecl8_03068	ecl8_03068	hypothetical protein	-1.41039	5.37157	0.33535	0.509769
ecl8_04243	gltC_7	HTH-type transcriptional regulator GltC	-1.41025	8.63043	0.000844261	0.00448797
ecl8_03239	ycaO	Ribosomal protein S12 methylthiotransferase accessory factor YcaO	-1.40953	8.13816	0.00185247	0.00878291
ecl8_01208	pat_1	Protein lysine acetyltransferase Pat	-1.40731	7.615	0.0129769	0.0434839
ecl8_00871	araQ	L-arabinose transport system permease protein AraQ	-1.40522	6.73604	0.154229	0.299591
ecl8_03538	gltI	Glutamate/aspartate import solute-binding protein	-1.40502	6.78306	0.117643	0.247261
ecl8_04333	deoB	Phosphopentomutase	-1.40265	7.2964	0.0263092	0.0781896
ecl8_01661	galF	UTP--glucose-1-phosphate uridylyltransferase	-1.40162	6.69304	0.22711	0.391539
ecl8_01341	cysP	Thiosulfate-binding protein	-1.40154	6.456	0.237317	0.404136
ecl8_02479	rbsC_2	Ribose import permease protein RbsC	-1.39966	5.81234	0.317845	0.491025
ecl8_01985	oppC	Oligopeptide transport system permease protein OppC	-1.39905	6.10305	0.273981	0.446441
ecl8_01530	atoA	Acetate CoA-transferase subunit beta	-1.39898	5.37842	0.366197	0.536544
ecl8_01566	lpxT	Lipid A 1-diphosphate synthase	-1.39843	7.31494	0.026332	0.0781896
ecl8_04436	ecl8_04436	hypothetical protein	-1.39817	7.76193	0.0218923	0.0669521
ecl8_04274	carB	Carbamoyl-phosphate synthase large chain	-1.39672	8.89323	0.00156691	0.00755504
ecl8_03065	iutA_1	Ferric aerobactin receptor	-1.39634	6.93936	0.144383	0.286072
ecl8_04529	ecl8_04529	hypothetical protein	-1.39383	9.10376	7.65e-05	0.000612167
ecl8_03450	modA_2	Molybdate-binding protein ModA	-1.39226	6.12069	0.452952	0.617599
ecl8_04140	dgt	Deoxyguanosinetriphosphate triphosphohydrolase	-1.38863	9.32594	0.000164152	0.00115507
ecl8_00854	uhpA_2	Transcriptional regulatory protein UhpA	-1.38732	8.40057	0.00052473	0.00298867
ecl8_00558	garL	5-keto-4-deoxy-D-glucarate aldolase	-1.38592	6.57224	0.172606	0.323987
ecl8_00802	ureA2	Urease subunit gamma 2	-1.38538	5.84237	0.375226	0.54565
ecl8_02252	ecl8_02252	hypothetical protein	-1.38496	5.17439	0.454168	0.618492
ecl8_01533	atoS	Signal transduction histidine-protein kinase AtoS	-1.38397	7.1691	0.0442545	0.119044
ecl8_01709	cobT_3	Nicotinate-nucleotide--dimethylbenzimidazole phosphoribosyltransferase	-1.38334	5.35842	0.453401	0.618021
ecl8_00818	kefF_1	Glutathione-regulated potassium-efflux system ancillary protein KefF	-1.38306	6.75296	0.126067	0.260065
ecl8_03154	puuD	Gamma-glutamyl-gamma-aminobutyrate hydrolase PuuD	-1.38288	6.21778	0.376089	0.54637
ecl8_00366	tsgA	Protein TsgA	-1.38265	8.35627	0.000942005	0.00493115
ecl8_01769	ecl8_01769	hypothetical protein	-1.38264	5.25179	0.357564	0.529473
ecl8_00477	zapE_1	Cell division protein ZapE	-1.38011	8.11893	0.00483374	0.0194046
ecl8_00395	outO_1	Type 4 prepilin-like proteins leader peptide-processing enzyme	-1.37905	7.23271	0.0583205	0.146706
ecl8_03777	ecl8_03777	hypothetical protein	-1.36944	7.64987	0.0108439	0.037608
ecl8_03762	ecl8_03762	hypothetical protein	-1.36743	5.43827	0.39096	0.561391
ecl8_04304	satP	Succinate-acetate/proton symporter SatP	-1.36667	7.0135	0.102982	0.225812
ecl8_00580	sstT	Serine/threonine transporter SstT	-1.36406	7.81162	0.00624363	0.0240888
ecl8_01163	pgrR_2	HTH-type transcriptional regulator PgrR	-1.36395	6.88144	0.0926224	0.207795
ecl8_04104	metQ_5	D-methionine-binding lipoprotein MetQ	-1.36064	8.30348	0.0386606	0.106996
ecl8_00135	mutM	Formamidopyrimidine-DNA glycosylase	-1.35908	7.80693	0.0062941	0.0241904
ecl8_01215	yfiC	tRNA1(Val) (adenine(37)-N6)-methyltransferase	-1.35894	6.72284	0.148609	0.291885
ecl8_03541	glnQ_6	Glutamine transport ATP-binding protein GlnQ	-1.35529	7.23164	0.0408034	0.111972
ecl8_02213	sodB	Superoxide dismutase [Fe]	-1.35505	5.55287	0.396999	0.566235
ecl8_03955	queA	S-adenosylmethionine:tRNA ribosyltransferase-isomerase	-1.35383	6.28594	0.363704	0.534823
ecl8_02919	pfeA_1	Ferric enterobactin receptor	-1.35171	7.25364	0.0543623	0.139103
ecl8_01995	ecl8_01995	hypothetical protein	-1.3477	5.7947	0.34639	0.520182
ecl8_04573	ytfP	Gamma-glutamylcyclotransferase family protein ytfP	-1.3467	6.7975	0.118023	0.24757
ecl8_00683	ecl8_00683	hypothetical protein	-1.34608	7.10307	0.0582236	0.146545
ecl8_03293	grxA	Glutaredoxin 1	-1.34564	4.44734	0.500023	0.657555
ecl8_00600	ebgC	Evolved beta-galactosidase subunit beta	-1.34394	5.35064	0.429075	0.596532
ecl8_04268	apaG	Protein ApaG	-1.3433	5.94291	0.368793	0.539284
ecl8_00709	speC	Constitutive ornithine decarboxylase	-1.34155	8.31275	0.00879739	0.0318995
ecl8_00315	gntR_1	HTH-type transcriptional regulator GntR	-1.33606	6.78956	0.150238	0.294662
ecl8_03540	gltK_2	Glutamate/aspartate import permease protein GltK	-1.33595	6.23669	0.283745	0.456696
ecl8_03907	ecl8_03907	hypothetical protein	-1.33368	5.78265	0.448248	0.613304
ecl8_03964	ecl8_03964	hypothetical protein	-1.33326	6.36126	0.27754	0.44963
ecl8_00302	lptB_1	Lipopolysaccharide export system ATP-binding protein LptB	-1.33315	7.13403	0.0626237	0.154824
ecl8_03460	ecl8_03460	hypothetical protein	-1.33286	4.93814	0.512068	0.66798
ecl8_00494	ptsN	Nitrogen regulatory protein	-1.33263	6.07242	0.30981	0.48195
ecl8_00167	yibL	putative protein YibL	-1.33188	6.12562	0.287952	0.460176
ecl8_04953	yfkN	Trifunctional nucleotide phosphoesterase protein YfkN	-1.33172	9.70565	0.00026274	0.00168365
ecl8_01733	ecl8_01733	hypothetical protein	-1.33103	7.38007	0.0324441	0.0929953
ecl8_04202	ampE	Protein AmpE	-1.32948	7.74569	0.00990184	0.035189
ecl8_05089	spo0J	Stage 0 sporulation protein J	-1.32947	7.46031	0.0250907	0.075154
ecl8_04795	metAS	Homoserine O-succinyltransferase	-1.32915	7.45914	0.0206651	0.0640067
ecl8_00686	ecl8_00686	hypothetical protein	-1.32762	5.48907	0.35669	0.528897
ecl8_00865	cytR_1	HTH-type transcriptional repressor CytR	-1.32683	7.01455	0.0822704	0.190809
ecl8_00627	hdeB_2	Acid stress chaperone HdeB	-1.32625	6.98437	0.178643	0.331701
ecl8_01776	yecS_1	L-cystine transport system permease protein YecS	-1.32548	5.86262	0.339222	0.513729
ecl8_01726	ecl8_01726	hypothetical protein	-1.3247	6.48136	0.351743	0.524699
ecl8_00602	lacR	HTH-type transcriptional regulator LacR	-1.32458	6.19709	0.322683	0.495137
ecl8_01346	yybH	putative protein YybH	-1.32244	4.96574	0.480307	0.639521
ecl8_03898	glnK	Nitrogen regulatory protein P-II 2	-1.3202	4.43043	0.507226	0.663215
ecl8_00669	adaA_1	Bifunctional transcriptional activator/DNA repair enzyme AdaA	-1.31646	6.9379	0.0845374	0.193949
ecl8_04788	sdhL	Shikimate dehydrogenase-like protein	-1.3151	6.99087	0.0778892	0.182738
ecl8_00736	speA	Biosynthetic arginine decarboxylase	-1.31468	8.14459	0.00284177	0.0125862
ecl8_02571	uxaB	Altronate oxidoreductase	-1.31344	6.65379	0.202524	0.360726
ecl8_04914	ppiC_1	Peptidyl-prolyl cis-trans isomerase C	-1.3114	6.27477	0.38777	0.557709
ecl8_04181	can_1	Carbonic anhydrase 2	-1.31136	6.6632	0.421227	0.588372
ecl8_04077	ecl8_04077	hypothetical protein	-1.31129	6.74525	0.146529	0.289295
ecl8_03770	ecl8_03770	hypothetical protein	-1.31027	6.21336	0.401674	0.570348
ecl8_00328	malT	HTH-type transcriptional regulator MalT	-1.3102	9.61735	9.18e-05	0.000711167
ecl8_01854	ftsI_1	Peptidoglycan D,D-transpeptidase FtsI	-1.30929	6.98405	0.184703	0.339022
ecl8_01859	manY	PTS system mannose-specific EIIC component	-1.3085	6.73639	0.161421	0.308457
ecl8_00812	ecl8_00812	hypothetical protein	-1.30523	5.90717	0.34146	0.515284
ecl8_04849	fadB	Fatty acid oxidation complex subunit alpha	-1.30177	8.86748	0.000291893	0.00183617
ecl8_04048	pknK	Serine/threonine-protein kinase PknK	-1.30064	8.94639	0.000228488	0.00150525
ecl8_03240	focA	putative formate transporter 1	-1.29926	7.59658	0.0358507	0.100816
ecl8_01587	mglB	D-galactose-binding periplasmic protein	-1.29809	6.87288	0.118132	0.24757
ecl8_01531	atoD	Acetate CoA-transferase subunit alpha	-1.29657	5.32038	0.520599	0.675748
ecl8_03168	oppA_2	Periplasmic oligopeptide-binding protein	-1.29647	7.2353	0.046953	0.124132
ecl8_04920	ilvE	Branched-chain-amino-acid aminotransferase	-1.29546	8.21428	0.00314632	0.0136637
ecl8_04369	sorB_2	PTS system sorbose-specific EIIB component	-1.29521	6.48175	0.448016	0.613304
ecl8_04237	leuC	3-isopropylmalate dehydratase large subunit	-1.29381	7.76753	0.0128	0.0430205
ecl8_03008	cydB_2	Cytochrome bd-I ubiquinol oxidase subunit 2	-1.29376	6.25625	0.276461	0.449023
ecl8_03108	ecl8_03108	hypothetical protein	-1.29078	4.9719	0.527559	0.681281
ecl8_01431	ecl8_01431	hypothetical protein	-1.29063	8.4959	0.0032983	0.0142135
ecl8_00192	ecl8_00192	hypothetical protein	-1.28803	6.92686	0.0961343	0.213738
ecl8_00779	ribZ_1	Riboflavin transporter RibZ	-1.28773	7.82286	0.012089	0.0409392
ecl8_01666	kanF	2-deoxystreptamine glucosyltransferase	-1.28763	7.35031	0.0449735	0.120397
ecl8_05276	ecl8_05276	hypothetical protein	-1.28532	8.18092	0.00300045	0.0131325
ecl8_00313	yhhX	putative oxidoreductase YhhX	-1.28459	8.15743	0.00403538	0.0168361
ecl8_00822	ecl8_00822	hypothetical protein	-1.28424	6.61647	0.206812	0.366606
ecl8_01472	ecl8_01472	hypothetical protein	-1.28156	4.5392	0.497799	0.655695
ecl8_04666	ecl8_04666	hypothetical protein	-1.28051	7.48887	0.0221318	0.0675158
ecl8_03873	gabR_3	HTH-type transcriptional regulatory protein GabR	-1.27953	7.0506	0.0909237	0.205015
ecl8_04805	zraS	Sensor protein ZraS	-1.27855	8.02331	0.172813	0.324065
ecl8_00853	pdeH_1	Cyclic di-GMP phosphodiesterase PdeH	-1.27829	8.64395	0.00184342	0.00876509
ecl8_05098	ecl8_05098	hypothetical protein	-1.27794	7.0746	0.105527	0.229698
ecl8_00361	cysG_1	Siroheme synthase	-1.27392	7.97561	0.0109906	0.037969
ecl8_05000	fdoG_1	Formate dehydrogenase-O major subunit	-1.2726	6.74507	0.186205	0.340778
ecl8_04365	frlB_2	Fructosamine deglycase FrlB	-1.2688	8.6446	0.0275586	0.0811296
ecl8_00816	ecl8_00816	hypothetical protein	-1.26849	8.22878	0.00317634	0.0137672
ecl8_03773	ecl8_03773	hypothetical protein	-1.2683	5.38914	0.527425	0.681281
ecl8_02678	apbE_2	FAD:protein FMN transferase	-1.26804	6.13528	0.398762	0.56766
ecl8_01734	ecl8_01734	hypothetical protein	-1.26443	6.06914	0.416219	0.583203
ecl8_02465	ulaA_1	Ascorbate-specific PTS system EIIC component	-1.26229	6.84435	0.183611	0.337965
ecl8_01371	mntH	Divalent metal cation transporter MntH	-1.26202	7.18174	0.0746985	0.17721
ecl8_00851	mrkD_1	Fimbria adhesin protein	-1.26154	7.12112	0.078901	0.184821
ecl8_05122	flmA	Stable plasmid inheritance protein	-1.26129	5.85751	0.3511	0.52424
ecl8_00508	ibaG	Acid stress protein IbaG	-1.25662	5.33739	0.392018	0.561628
ecl8_02482	rbsB_1	Ribose import binding protein RbsB	-1.25639	7.31018	0.0488778	0.128232
ecl8_04046	accC_2	Biotin carboxylase	-1.25507	7.64709	0.0321311	0.0924547
ecl8_03196	pqiA	Paraquat-inducible protein A	-1.25342	6.65901	0.195472	0.352245
ecl8_03311	ecl8_03311	hypothetical protein	-1.25296	7.35687	0.0383441	0.106286
ecl8_03014	ecl8_03014	putative zinc-binding alcohol dehydrogenase	-1.2529	6.85105	0.147538	0.290517
ecl8_03337	ecl8_03337	hypothetical protein	-1.25261	7.35188	0.0933539	0.209225
ecl8_01742	intA_5	Prophage integrase IntA	-1.2522	7.65951	0.0255067	0.0761956
ecl8_01967	narH	Respiratory nitrate reductase 1 beta chain	-1.25169	6.28614	0.288644	0.460427
ecl8_01477	yfcE	Phosphodiesterase YfcE	-1.25095	5.89033	0.517672	0.672733
ecl8_01993	yciI	Protein YciI	-1.24796	6.48454	0.251154	0.419986
ecl8_01193	tyrA	T-protein	-1.24771	6.58182	0.214921	0.376936
ecl8_01802	yagG_2	Putative glycoside/cation symporter YagG	-1.24755	7.55086	0.219594	0.382472
ecl8_00696	metC_2	Cystathionine beta-lyase	-1.24667	6.75769	0.329431	0.503
ecl8_03295	aspT_2	Aspartate/alanine antiporter	-1.24446	8.06066	0.00754566	0.0281367
ecl8_01181	ypjD	Inner membrane protein YpjD	-1.24188	7.0898	0.12694	0.261382
ecl8_03882	malG_1	Maltose transport system permease protein MalG	-1.24185	7.18567	0.117143	0.246792
ecl8_00367	ppiA	Peptidyl-prolyl cis-trans isomerase A	-1.23892	7.39468	0.0385163	0.106697
ecl8_00759	msrAB	Peptide methionine sulfoxide reductase MsrA/MsrB	-1.23892	6.73536	0.169511	0.31994
ecl8_01838	ecl8_01838	hypothetical protein	-1.22901	8.08469	0.00527865	0.0209829
ecl8_02380	oxyR_3	Hydrogen peroxide-inducible genes activator	-1.2273	6.27401	0.405926	0.57432
ecl8_04744	uvrA_2	UvrABC system protein A	-1.22708	9.28324	0.000438141	0.00258823
ecl8_04109	nlpE	Lipoprotein NlpE	-1.22688	7.00545	0.103332	0.226356
ecl8_02916	ecl8_02916	hypothetical protein	-1.22681	5.75098	0.37761	0.547154
ecl8_00599	ygjI_2	Inner membrane transporter YgjI	-1.22651	7.19999	0.0651656	0.159604
ecl8_00122	ecl8_00122	hypothetical protein	-1.2234	5.40286	0.39624	0.565514
ecl8_03774	ecl8_03774	hypothetical protein	-1.2223	7.43265	0.050823	0.132016
ecl8_04049	acoA	Acetoin:2,6-dichlorophenolindophenol oxidoreductase subunit alpha	-1.22179	7.06562	0.115593	0.244565
ecl8_01359	cynR_1	HTH-type transcriptional regulator CynR	-1.22163	7.00331	0.169283	0.31978
ecl8_00677	yqhD	Alcohol dehydrogenase YqhD	-1.22082	7.59191	0.0211303	0.0652189
ecl8_01421	ecl8_01421	hypothetical protein	-1.21997	5.93466	0.373561	0.544116
ecl8_01795	ftnA_2	Bacterial non-heme ferritin	-1.2158	5.88709	0.363138	0.534697
ecl8_00191	ecl8_00191	hypothetical protein	-1.2152	9.72828	0.000296623	0.0018633
ecl8_01522	glpQ	Glycerophosphodiester phosphodiesterase, periplasmic	-1.21471	6.47397	0.478859	0.638288
ecl8_01744	yeeO	putative FMN/FAD exporter YeeO	-1.21381	7.95704	0.00999969	0.0353957
ecl8_03947	yajI	putative lipoprotein YajI	-1.2131	6.60924	0.464338	0.626231
ecl8_04777	lysC	Lysine-sensitive aspartokinase 3	-1.21095	8.19941	0.0100568	0.0355695
ecl8_03887	rcnR	Transcriptional repressor RcnR	-1.20715	5.07326	0.521431	0.676435
ecl8_03263	aqpZ	Aquaporin Z	-1.20519	8.89844	0.00199817	0.00932202
ecl8_01966	narG	Respiratory nitrate reductase 1 alpha chain	-1.20472	7.87975	0.01245	0.0419704
ecl8_04544	hexR_4	HTH-type transcriptional regulator HexR	-1.20182	7.04757	0.127767	0.262599
ecl8_00844	ecl8_00844	hypothetical protein	-1.20055	7.23465	0.0660009	0.160855
ecl8_03163	yeaX_2	Carnitine monooxygenase reductase subunit	-1.2003	6.36914	0.292518	0.463785
ecl8_03130	nupC_2	Nucleoside permease NupC	-1.19853	8.82681	0.00686476	0.0260347
ecl8_00817	iolS_1	Aldo-keto reductase IolS	-1.19691	7.23194	0.0798194	0.186287
ecl8_00021	malP_1	PTS system maltose-specific EIICB component	-1.19504	8.32249	0.00740288	0.0276755
ecl8_04116	ldcC	Constitutive lysine decarboxylase	-1.19334	8.22202	0.0102036	0.0359179
ecl8_00998	queD	6-carboxy-5,6,7,8-tetrahydropterin synthase	-1.19308	6.74933	0.20331	0.361836
ecl8_01170	intA_3	Prophage integrase IntA	-1.19297	8.14245	0.0234476	0.0709955
ecl8_04288	ecl8_04288	hypothetical protein	-1.1906	6.20178	0.374703	0.545097
ecl8_04362	ecl8_04362	hypothetical protein	-1.18999	6.7543	0.194137	0.350264
ecl8_04244	gudP_3	putative glucarate transporter	-1.18975	10.1021	0.000207708	0.00139514
ecl8_04263	djlA	Co-chaperone protein DjlA	-1.18901	6.89925	0.246691	0.415657
ecl8_01994	ecl8_01994	hypothetical protein	-1.18815	5.11208	0.55545	0.706188
ecl8_04460	mlc_2	Protein mlc	-1.18621	8.25816	0.026244	0.0781363
ecl8_01857	ecl8_01857	hypothetical protein	-1.18424	6.73151	0.293557	0.464938
ecl8_04138	cdaR_2	Carbohydrate diacid regulator	-1.18356	7.4673	0.0427308	0.115924
ecl8_04649	fimC_3	Chaperone protein FimC	-1.18344	6.81363	0.448251	0.613304
ecl8_00674	ecl8_00674	hypothetical protein	-1.18064	6.33142	0.309955	0.482009
ecl8_01187	ecl8_01187	hypothetical protein	-1.1806	5.80066	0.548785	0.70041
ecl8_04727	soxS_3	Regulatory protein SoxS	-1.18059	6.05021	0.37588	0.546244
ecl8_02017	dadA_2	D-amino acid dehydrogenase	-1.18034	6.96069	0.127967	0.262843
ecl8_02243	rsxB	Electron transport complex subunit RsxB	-1.17711	5.45999	0.425135	0.592346
ecl8_00507	mlaB	putative phospholipid ABC transporter-binding protein MlaB	-1.17377	6.30496	0.454328	0.618492
ecl8_02531	map_1	Methionine aminopeptidase	-1.17328	6.1542	0.527611	0.681281
ecl8_02208	ydhC	Inner membrane transport protein YdhC	-1.17202	6.16246	0.351404	0.524519
ecl8_01757	pgrR_3	HTH-type transcriptional regulator PgrR	-1.16244	6.52788	0.257726	0.42699
ecl8_01599	oprM_2	Outer membrane protein OprM	-1.16241	7.43903	0.0480241	0.126364
ecl8_00006	ecl8_00006	hypothetical protein	-1.16153	7.44198	0.0704905	0.169939
ecl8_04037	accB_2	Biotin carboxyl carrier protein of acetyl-CoA carboxylase	-1.16149	6.03853	0.54069	0.692953
ecl8_04425	lsrB_2	Autoinducer 2-binding protein LsrB	-1.16142	8.9311	0.0058637	0.0228203
ecl8_01692	hisH	Imidazole glycerol phosphate synthase subunit HisH	-1.16141	6.21803	0.359201	0.530529
ecl8_01165	ecl8_01165	hypothetical protein	-1.15712	6.26953	0.324804	0.497297
ecl8_00601	ebgA	Evolved beta-galactosidase subunit alpha	-1.15539	8.68034	0.00288536	0.0127036
ecl8_00371	argD	Acetylornithine/succinyldiaminopimelate aminotransferase	-1.15019	7.81213	0.0254387	0.0760942
ecl8_00984	ecl8_00984	hypothetical protein	-1.14895	6.58864	0.252085	0.421086
ecl8_04790	metH	Methionine synthase	-1.14695	9.50465	0.000950031	0.00496733
ecl8_03048	rpiB	Ribose-5-P isomerase B	-1.14434	7.0289	0.197189	0.354622
ecl8_01348	pdxK	Pyridoxine/pyridoxal/pyridoxamine kinase	-1.14401	6.47053	0.284391	0.45724
ecl8_04909	gppA	Guanosine-5'-triphosphate,3'-diphosphate pyrophosphatase	-1.14251	8.79853	0.00418482	0.0173299
ecl8_01412	ecl8_01412	hypothetical protein	-1.1424	6.05491	0.448205	0.613304
ecl8_04247	sgrR_2	HTH-type transcriptional regulator SgrR	-1.14148	8.01482	0.061021	0.151872
ecl8_04528	yurK	putative HTH-type transcriptional regulator YurK	-1.14008	7.82606	0.0324052	0.0929436
ecl8_03452	modE	Transcriptional regulator ModE	-1.13963	6.58512	0.257019	0.425976
ecl8_00261	pitA	Low-affinity inorganic phosphate transporter 1	-1.13887	6.28141	0.353866	0.526431
ecl8_03128	efeO	Iron uptake system component EfeO	-1.13872	6.36773	0.31536	0.4882
ecl8_05106	ecl8_05106	hypothetical protein	-1.13661	5.41605	0.573954	0.721894
ecl8_00518	yhbY	RNA-binding protein YhbY	-1.13485	6.1767	0.352799	0.525545
ecl8_01855	rlmA	23S rRNA (guanine(745)-N(1))-methyltransferase	-1.13413	5.7671	0.512591	0.668222
ecl8_01852	ecl8_01852	hypothetical protein	-1.1317	6.40962	0.335716	0.510151
ecl8_04754	ecl8_04754	hypothetical protein	-1.13137	7.13372	0.253966	0.422802
ecl8_00820	pgrR_1	HTH-type transcriptional regulator PgrR	-1.13058	8.24856	0.00831262	0.0304637
ecl8_03238	ecl8_03238	hypothetical protein	-1.12868	6.32486	0.337142	0.511795
ecl8_00463	ecl8_00463	hypothetical protein	-1.1286	9.20576	0.00364704	0.0154324
ecl8_01982	ecl8_01982	hypothetical protein	-1.12792	7.19607	0.112261	0.239906
ecl8_03883	malF_1	Maltose transport system permease protein MalF	-1.12675	7.69567	0.0365799	0.102479
ecl8_00550	osmY_1	Osmotically-inducible protein Y	-1.12603	7.08989	0.155531	0.301369
ecl8_04653	ecl8_04653	hypothetical protein	-1.12584	8.71876	0.0213918	0.0659346
ecl8_00673	rimO_2	Ribosomal protein S12 methylthiotransferase RimO	-1.12423	8.29978	0.0108806	0.0376765
ecl8_05245	ecl8_05245	hypothetical protein	-1.12219	7.31124	0.108827	0.234596
ecl8_03288	potF	Putrescine-binding periplasmic protein	-1.12128	6.4456	0.314421	0.487424
ecl8_00660	ecl8_00660	hypothetical protein	-1.1205	6.99423	0.136665	0.27543
ecl8_04088	gloB_2	Hydroxyacylglutathione hydrolase	-1.11857	6.75824	0.318759	0.491755
ecl8_04261	citA_1	Sensor histidine kinase CitA	-1.11635	8.40816	0.0872477	0.199041
ecl8_03514	ecl8_03514	hypothetical protein	-1.116	5.63968	0.423476	0.590414
ecl8_01588	mglA_1	Galactose/methyl galactoside import ATP-binding protein MglA	-1.11566	8.12597	0.0331294	0.0946554
ecl8_04368	agaC	N-acetylgalactosamine permease IIC component 1	-1.11557	8.33356	0.0141618	0.046856
ecl8_04723	nhaK_2	Sodium, potassium, lithium and rubidium/H(+) antiporter	-1.11551	8.15249	0.00996669	0.035335
ecl8_01433	ecl8_01433	hypothetical protein	-1.11516	8.64213	0.00314444	0.0136637
ecl8_02875	ves	Protein Ves	-1.10981	5.27671	0.585983	0.73289
ecl8_01424	ecl8_01424	hypothetical protein	-1.10951	6.38698	0.324043	0.496302
ecl8_04604	ulaA_3	Ascorbate-specific PTS system EIIC component	-1.10844	8.18233	0.0100975	0.0356369
ecl8_00664	ygiN	putative quinol monooxygenase YgiN	-1.10745	6.67598	0.446414	0.612805
ecl8_00754	ubiI	2-octaprenylphenol hydroxylase	-1.10659	5.35028	0.442121	0.607661
ecl8_03382	ybiO	Moderate conductance mechanosensitive channel YbiO	-1.10625	7.41757	0.0766407	0.180569
ecl8_01481	ecl8_01481	hypothetical protein	-1.10592	5.04121	0.498758	0.65657
ecl8_00743	mscS	Small-conductance mechanosensitive channel	-1.10493	6.79745	0.240171	0.407287
ecl8_01535	rcsB	Transcriptional regulatory protein RcsB	-1.10418	5.74592	0.471763	0.631704
ecl8_00748	serA	D-3-phosphoglycerate dehydrogenase	-1.10231	6.9312	0.155549	0.301369
ecl8_05208	dksA_2	RNA polymerase-binding transcription factor DksA	-1.10205	6.57218	0.276173	0.448718
ecl8_04970	cpxA	Sensor histidine kinase CpxA	-1.10086	8.14079	0.0125498	0.042243
ecl8_01983	oppA_1	Periplasmic oligopeptide-binding protein	-1.10061	8.14565	0.0141788	0.0468772
ecl8_03201	pyrD	Dihydroorotate dehydrogenase (quinone)	-1.09901	9.05171	0.00696043	0.0262858
ecl8_00687	yghU	Disulfide-bond oxidoreductase YghU	-1.09466	6.10918	0.473839	0.633576
ecl8_00317	gntU	Low-affinity gluconate transporter	-1.09432	7.95753	0.0233175	0.0707938
ecl8_01797	araG	Arabinose import ATP-binding protein AraG	-1.09296	6.61102	0.271514	0.443807
ecl8_04685	melR	Melibiose operon regulatory protein	-1.09209	7.63078	0.0647228	0.158694
ecl8_00376	ecl8_00376	hypothetical protein	-1.09024	6.72342	0.358815	0.530528
ecl8_03209	hipO_3	Hippurate hydrolase	-1.09022	6.20642	0.368325	0.538776
ecl8_04613	nsrR_2	HTH-type transcriptional repressor NsrR	-1.0864	7.06276	0.152074	0.297315
ecl8_01411	ecl8_01411	hypothetical protein	-1.08256	5.30356	0.59288	0.739235
ecl8_05085	ecl8_05085	hypothetical protein	-1.08138	5.79914	0.580411	0.728372
ecl8_00449	prmA	Ribosomal protein L11 methyltransferase	-1.07851	7.07273	0.180762	0.334106
ecl8_02287	ecl8_02287	hypothetical protein	-1.07488	5.9636	0.41516	0.582206
ecl8_05084	ecl8_05084	Insertion sequence IS5376 putative ATP-binding protein	-1.0742	7.74317	0.0585945	0.147235
ecl8_04774	ecl8_04774	hypothetical protein	-1.07361	6.79094	0.213759	0.375192
ecl8_05207	folE2	GTP cyclohydrolase FolE2	-1.07233	5.7294	0.510169	0.666088
ecl8_00168	ecl8_00168	hypothetical protein	-1.07058	6.16124	0.387683	0.557709
ecl8_04762	ubiC	Chorismate pyruvate-lyase	-1.06857	6.7044	0.291028	0.462391
ecl8_05278	umuC_2	Protein UmuC	-1.06844	6.31205	0.382229	0.55259
ecl8_04497	prkC	Serine/threonine-protein kinase PrkC	-1.06715	10.0361	0.00105948	0.00546273
ecl8_04192	ecl8_04192	hypothetical protein	-1.06643	7.7683	0.047706	0.125676
ecl8_01600	yohD	Inner membrane protein YohD	-1.06564	5.75458	0.450185	0.615331
ecl8_03278	artQ_2	Arginine ABC transporter permease protein ArtQ	-1.06391	5.09258	0.477587	0.637355
ecl8_04538	treR	HTH-type transcriptional regulator TreR	-1.06338	6.64577	0.365315	0.535915
ecl8_00303	livF_1	High-affinity branched-chain amino acid transport ATP-binding protein LivF	-1.0627	7.16883	0.386326	0.55635
ecl8_03794	ecl8_03794	hypothetical protein	-1.06211	5.82785	0.587013	0.733766
ecl8_03176	ecl8_03176	hypothetical protein	-1.06075	6.83533	0.217155	0.379213
ecl8_04325	slt	Soluble lytic murein transglycosylase	-1.05801	7.87735	0.0613012	0.152484
ecl8_04873	pldA	Phospholipase A1	-1.05489	8.41255	0.0280416	0.0823988
ecl8_03404	ybhN	Inner membrane protein YbhN	-1.04877	6.35802	0.353001	0.525671
ecl8_03330	ecl8_03330	hypothetical protein	-1.04832	5.57167	0.468616	0.629541
ecl8_03799	ecl8_03799	hypothetical protein	-1.04794	5.64246	0.453888	0.618458
ecl8_01773	amyA	Cytoplasmic alpha-amylase	-1.04621	7.34063	0.160106	0.306997
ecl8_01384	ecl8_01384	hypothetical protein	-1.04425	6.80553	0.222238	0.385374
ecl8_05024	mobA	Molybdenum cofactor guanylyltransferase	-1.0438	6.35002	0.39718	0.566312
ecl8_01860	manX_1	PTS system mannose-specific EIIAB component	-1.0403	6.37242	0.36675	0.537001
ecl8_03022	ecl8_03022	hypothetical protein	-1.03701	7.52943	0.0601564	0.150234
ecl8_01991	ecl8_01991	hypothetical protein	-1.03634	4.83331	0.611766	0.754974
ecl8_01435	ecl8_01435	hypothetical protein	-1.036	8.32057	0.0219166	0.0669521
ecl8_04534	pyrB	Aspartate carbamoyltransferase catalytic subunit	-1.0355	7.41593	0.104908	0.228994
ecl8_03265	hcp	Hydroxylamine reductase	-1.03495	7.34854	0.0994478	0.219356
ecl8_05193	ecl8_05193	hypothetical protein	-1.03419	10.7076	0.0107509	0.0374016
ecl8_03298	ecl8_03298	hypothetical protein	-1.03055	7.54427	0.059935	0.149922
ecl8_00393	bfd	Bacterioferritin-associated ferredoxin	-1.02891	7.49735	0.107059	0.232125
ecl8_03491	nei	Endonuclease 8	-1.02819	6.12658	0.408392	0.575855
ecl8_00009	dgoK1_1	putative 2-dehydro-3-deoxygalactonokinase DgoK1	-1.02814	7.29439	0.109864	0.236255
ecl8_04050	acoB	Acetoin:2,6-dichlorophenolindophenol oxidoreductase subunit beta	-1.02776	7.10892	0.152175	0.297315
ecl8_00578	uxaA	Altronate dehydratase	-1.026	8.12178	0.0222282	0.0677169
ecl8_00514	yhbE	putative inner membrane transporter YhbE	-1.02593	6.5231	0.343642	0.51726
ecl8_02054	sufC	putative ATP-dependent transporter SufC	-1.02296	6.45898	0.339084	0.513694
ecl8_01378	ypdA	Sensor histidine kinase YpdA	-1.02233	7.69449	0.0457431	0.121727
ecl8_04967	fieF_2	Ferrous-iron efflux pump FieF	-1.02208	7.68992	0.0633259	0.156041
ecl8_04458	uidB	Glucuronide carrier protein	-1.02113	9.85064	0.00194793	0.00914501
ecl8_04397	ecl8_04397	hypothetical protein	-1.01844	5.92248	0.47625	0.635761
ecl8_04738	bamA_2	Outer membrane protein assembly factor BamA	-1.01798	10.3267	0.00196721	0.00920647
ecl8_02461	gntR_2	HTH-type transcriptional regulator GntR	-1.01793	7.80955	0.112865	0.24042
ecl8_05262	ecl8_05262	hypothetical protein	-1.01597	8.40729	0.0105729	0.0369543
ecl8_02642	ecl8_02642	hypothetical protein	-1.0147	4.72525	0.615995	0.757677
ecl8_03123	ycaC_1	putative hydrolase YcaC	-1.0141	6.14217	0.551809	0.702946
ecl8_04592	oapA	Opacity-associated protein OapA	-1.01326	7.65462	0.0518786	0.134366
ecl8_00011	dgoD	D-galactonate dehydratase	-1.01262	10.3593	0.00185308	0.00878291
ecl8_00384	fkpA_1	FKBP-type peptidyl-prolyl cis-trans isomerase FkpA	-1.0124	8.52395	0.16105	0.308144
ecl8_00378	yheS_2	putative ABC transporter ATP-binding protein YheS	-1.01196	8.89303	0.0116665	0.0398411
ecl8_01761	ompN_1	Outer membrane protein N	-1.01042	8.38252	0.0326422	0.0935029
ecl8_04489	ecl8_04489	hypothetical protein	-1.01039	7.6652	0.123974	0.256613
ecl8_00346	yrfG	GMP/IMP nucleotidase YrfG	-1.00873	8.03831	0.0363011	0.101954
ecl8_03233	ihfB	Integration host factor subunit beta	-1.00773	4.58522	0.61544	0.75756
ecl8_00777	nlpD_1	Murein hydrolase activator NlpD	-1.00716	6.33993	0.377065	0.546978
ecl8_01436	ecl8_01436	hypothetical protein	-1.00577	6.94933	0.243708	0.411563
ecl8_00466	aaeX	Protein AaeX	-1.00476	5.52216	0.488238	0.646562
ecl8_01594	dusC	tRNA-dihydrouridine(16) synthase	-1.00251	7.86019	0.106478	0.23109
ecl8_00715	trmB	tRNA (guanine-N(7)-)-methyltransferase	-1.00191	6.32564	0.387984	0.557837
ecl8_05001	fdoG_2	Formate dehydrogenase-O major subunit	-0.999361	9.18319	0.00507813	0.0203125
ecl8_00862	ogl	Oligogalacturonate lyase	-0.998918	7.74642	0.0486752	0.1278
ecl8_04667	ecl8_04667	hypothetical protein	-0.998724	9.25994	0.00561367	0.0219622
ecl8_05086	ecl8_05086	hypothetical protein	-0.998138	5.30337	0.621435	0.761011
ecl8_04370	manX_3	PTS system mannose-specific EIIAB component	-0.994164	7.30737	0.240106	0.407287
ecl8_02175	yhdG_1	putative amino acid permease YhdG	-0.994006	7.19038	0.153709	0.298972
ecl8_03294	ybjM	Inner membrane protein YbjM	-0.99339	6.95198	0.195322	0.352117
ecl8_01287	ppx	Exopolyphosphatase	-0.991242	6.80394	0.343002	0.516646
ecl8_02882	srlR_2	Glucitol operon repressor	-0.991202	6.70225	0.285145	0.457627
ecl8_01247	ecl8_01247	hypothetical protein	-0.9895	6.78671	0.456281	0.619864
ecl8_01975	ecl8_01975	hypothetical protein	-0.987954	5.86058	0.481762	0.640625
ecl8_03160	caiT	L-carnitine/gamma-butyrobetaine antiporter	-0.987646	6.97113	0.26407	0.435061
ecl8_03813	ecl8_03813	hypothetical protein	-0.987469	5.75116	0.616908	0.758173
ecl8_04335	deoC	Deoxyribose-phosphate aldolase	-0.986232	6.84274	0.263511	0.434317
ecl8_03962	fba	Fructose-bisphosphate aldolase	-0.985369	8.70864	0.0244386	0.0734476
ecl8_00733	sprT	Protein SprT	-0.984858	5.75893	0.618156	0.759288
ecl8_01465	purF	Amidophosphoribosyltransferase	-0.980427	7.36244	0.106033	0.230462
ecl8_01496	nuoJ	NADH-quinone oxidoreductase subunit J	-0.9773	5.83203	0.5227	0.67749
ecl8_02234	pdxY	Pyridoxal kinase PdxY	-0.976179	6.07036	0.452056	0.617132
ecl8_03901	decR_1	DNA-binding transcriptional activator DecR	-0.975152	5.44688	0.499222	0.656988
ecl8_04318	creC	Sensor protein CreC	-0.973966	7.58438	0.0751719	0.177943
ecl8_03519	nagE	PTS system N-acetylglucosamine-specific EIICBA component	-0.972705	7.56561	0.0847827	0.194312
ecl8_05034	rbsB_5	Ribose import binding protein RbsB	-0.972628	7.50942	0.109922	0.236265
ecl8_05002	fdoH	Formate dehydrogenase-O iron-sulfur subunit	-0.970834	7.89904	0.0484863	0.12743
ecl8_04041	ybgK_2	putative protein YbgK	-0.970118	7.22989	0.171365	0.322485
ecl8_01487	cmpR_1	HTH-type transcriptional activator CmpR	-0.96914	7.66828	0.0820457	0.190387
ecl8_01229	murR	HTH-type transcriptional regulator MurR	-0.968985	5.82173	0.480358	0.639521
ecl8_05275	ecl8_05275	hypothetical protein	-0.968188	9.89829	0.00542573	0.0214528
ecl8_04671	ecl8_04671	hypothetical protein	-0.966828	8.37117	0.0147389	0.0485134
ecl8_04786	sorM	PTS system sorbose-specific EIID component	-0.965067	7.22894	0.14026	0.280035
ecl8_05045	rsmG	Ribosomal RNA small subunit methyltransferase G	-0.964116	8.94727	0.0444546	0.119295
ecl8_04179	yadH	Inner membrane transport permease YadH	-0.963354	7.08455	0.184714	0.339022
ecl8_01380	yycB	putative transporter YycB	-0.961474	7.2851	0.130563	0.26687
ecl8_03448	modB_1	Molybdenum transport system permease protein ModB	-0.960675	5.23536	0.637587	0.773569
ecl8_03403	clsB	Cardiolipin synthase B	-0.958663	6.59666	0.439289	0.605151
ecl8_04998	ecl8_04998	hypothetical protein	-0.958508	6.94694	0.210079	0.370631
ecl8_04498	intA_6	Prophage integrase IntA	-0.958374	10.0205	0.00252636	0.0114031
ecl8_04598	yajR_2	Inner membrane transport protein YajR	-0.957086	7.64536	0.0662347	0.161336
ecl8_02963	chiA1	Chitinase A1	-0.956869	7.22264	0.14726	0.290225
ecl8_03241	pflB	Formate acetyltransferase 1	-0.95489	6.61841	0.3705	0.541071
ecl8_03306	ecl8_03306	hypothetical protein	-0.953602	7.21601	0.153907	0.299226
ecl8_03307	ecl8_03307	hypothetical protein	-0.952949	5.99661	0.579144	0.727395
ecl8_04550	dgaF	2-dehydro-3-deoxy-phosphogluconate aldolase	-0.951235	6.69249	0.356709	0.528897
ecl8_03921	cyoE	Protoheme IX farnesyltransferase	-0.950255	6.22876	0.442858	0.608486
ecl8_03183	yccU	putative protein YccU	-0.950225	5.41523	0.635555	0.771523
ecl8_03555	dacA	D-alanyl-D-alanine carboxypeptidase DacA	-0.949067	6.12558	0.452529	0.617412
ecl8_01034	ecl8_01034	hypothetical protein	-0.948077	7.94022	0.0570608	0.144351
ecl8_01374	ipdC	Indole-3-pyruvate decarboxylase	-0.94667	7.5306	0.0839055	0.192959
ecl8_02416	ecl8_02416	hypothetical protein	-0.944524	7.10013	0.188178	0.342841
ecl8_00357	dam_1	DNA adenine methylase	-0.940346	5.77875	0.536492	0.689158
ecl8_05032	rbsR_4	Ribose operon repressor	-0.938077	7.947	0.106151	0.230605
ecl8_04954	ecl8_04954	hypothetical protein	-0.937728	10.1463	0.0051052	0.0203842
ecl8_01818	znuB	High-affinity zinc uptake system membrane protein ZnuB	-0.93618	6.03755	0.472302	0.632003
ecl8_00547	yhbO	Protein/nucleic acid deglycase 2	-0.935385	6.30794	0.46827	0.629491
ecl8_04170	dksA_1	RNA polymerase-binding transcription factor DksA	-0.93423	5.2106	0.530534	0.683867
ecl8_04553	ecl8_04553	hypothetical protein	-0.933906	6.89586	0.272942	0.445115
ecl8_01663	ecl8_01663	hypothetical protein	-0.933036	8.80744	0.00966741	0.0345209
ecl8_01764	dcm	DNA-cytosine methyltransferase	-0.93153	6.1791	0.449275	0.614464
ecl8_02635	dcp	Dipeptidyl carboxypeptidase	-0.931042	7.32692	0.156979	0.302517
ecl8_01343	cysW_1	Sulfate transport system permease protein CysW	-0.930852	6.6759	0.345085	0.518732
ecl8_01984	oppB	Oligopeptide transport system permease protein OppB	-0.930603	6.41368	0.435821	0.601971
ecl8_01729	nimR_2	HTH-type transcriptional regulator NimR	-0.929896	7.6185	0.118888	0.24855
ecl8_01409	ecl8_01409	hypothetical protein	-0.926179	6.06021	0.491249	0.649368
ecl8_01772	ecl8_01772	hypothetical protein	-0.925588	5.50605	0.601828	0.746842
ecl8_04315	ecl8_04315	putative tRNA/rRNA methyltransferase	-0.925414	7.10413	0.201752	0.359926
ecl8_03220	ecl8_03220	hypothetical protein	-0.924957	7.63895	0.0742882	0.176613
ecl8_04974	rhaR_2	HTH-type transcriptional activator RhaR	-0.921382	7.51547	0.154899	0.300501
ecl8_00538	deaD	ATP-dependent RNA helicase DeaD	-0.921349	6.55323	0.372972	0.543671
ecl8_01668	ecl8_01668	hypothetical protein	-0.920861	7.82483	0.0597395	0.149516
ecl8_03105	lpxL_1	Lipid A biosynthesis lauroyltransferase	-0.920447	5.60358	0.644665	0.777915
ecl8_03040	potD	Spermidine/putrescine-binding periplasmic protein	-0.920006	6.29805	0.607606	0.752338
ecl8_03192	lon_1	Lon protease	-0.919034	6.69721	0.391695	0.561628
ecl8_05097	ecl8_05097	hypothetical protein	-0.918508	7.8167	0.0654487	0.160034
ecl8_00714	mutY	Adenine DNA glycosylase	-0.914748	7.36177	0.140261	0.280035
ecl8_03037	potA_3	Spermidine/putrescine import ATP-binding protein PotA	-0.914254	5.75635	0.54577	0.697643
ecl8_03273	cph2	Phytochrome-like protein cph2	-0.914147	8.89363	0.0205098	0.0637004
ecl8_03218	ecl8_03218	hypothetical protein	-0.912023	7.61533	0.0917613	0.206486
ecl8_00500	kdsC	3-deoxy-D-manno-octulosonate 8-phosphate phosphatase KdsC	-0.910782	5.72668	0.509101	0.665277
ecl8_03876	rpmE2	50S ribosomal protein L31 type B	-0.909465	5.65904	0.61424	0.757399
ecl8_02969	yhdN	Aldo-keto reductase YhdN	-0.906822	6.09663	0.482771	0.641202
ecl8_00680	metC_1	Cystathionine beta-lyase MetC	-0.904388	7.6419	0.0803682	0.187078
ecl8_01490	nuoC	NADH-quinone oxidoreductase subunit C/D	-0.900924	7.12497	0.208027	0.368174
ecl8_00501	kdsD	Arabinose 5-phosphate isomerase KdsD	-0.89885	8.35541	0.0829672	0.191676
ecl8_02502	uvrA_1	UvrABC system protein A	-0.898605	7.661	0.0843603	0.193642
ecl8_01198	rluD	Ribosomal large subunit pseudouridine synthase D	-0.898595	7.13885	0.192774	0.348582
ecl8_02174	fabG_5	3-oxoacyl-[acyl-carrier-protein] reductase FabG	-0.896442	6.13232	0.468627	0.629541
ecl8_04745	yjbR_2	putative protein YjbR	-0.893942	6.62294	0.363418	0.534755
ecl8_02533	fimA_2	Type-1 fimbrial protein, A chain	-0.892191	7.04259	0.217097	0.379213
ecl8_01736	fabG_4	3-oxoacyl-[acyl-carrier-protein] reductase FabG	-0.891567	6.42767	0.415246	0.582206
ecl8_04725	yfcG_2	Disulfide-bond oxidoreductase YfcG	-0.891136	6.90927	0.270898	0.443541
ecl8_03536	corC	Magnesium and cobalt efflux protein CorC	-0.890788	6.74271	0.418149	0.585356
ecl8_00017	ecl8_00017	hypothetical protein	-0.888713	7.10095	0.212179	0.373007
ecl8_04193	ecl8_04193	hypothetical protein	-0.888472	6.7121	0.332037	0.506112
ecl8_03243	ycaD_2	putative MFS-type transporter YcaD	-0.886723	6.28712	0.471795	0.631704
ecl8_01819	znuC	Zinc import ATP-binding protein ZnuC	-0.885827	7.14758	0.277179	0.449464
ecl8_02249	ecl8_02249	Aminodeoxyfutalosine deaminase	-0.885001	5.92887	0.516265	0.671883
ecl8_04184	cueO	Blue copper oxidase CueO	-0.883667	7.50862	0.111146	0.238077
ecl8_00304	ugpB_1	sn-glycerol-3-phosphate-binding periplasmic protein UgpB	-0.882256	7.84665	0.159385	0.306096
ecl8_04194	ecl8_04194	hypothetical protein	-0.881961	4.67294	0.667968	0.792351
ecl8_03400	ybhR_2	putative multidrug ABC transporter permease YbhR	-0.88092	6.30977	0.593515	0.739407
ecl8_05030	pdhR_2	Pyruvate dehydrogenase complex repressor	-0.880919	7.54205	0.315754	0.48864
ecl8_01765	vsr	Very short patch repair protein	-0.879473	4.67146	0.668209	0.792351
ecl8_04964	menA	1,4-dihydroxy-2-naphthoate octaprenyltransferase	-0.879434	7.49718	0.132278	0.269266
ecl8_03771	ecl8_03771	hypothetical protein	-0.879096	5.54581	0.605949	0.750912
ecl8_05176	cusB_2	Cation efflux system protein CusB	-0.877616	8.23483	0.108829	0.234596
ecl8_01563	appA_2	Oligopeptide-binding protein AppA	-0.877093	7.21164	0.279904	0.452473
ecl8_01570	yeiP	Elongation factor P-like protein	-0.876333	7.98663	0.133964	0.271829
ecl8_04582	ytfJ	putative protein YtfJ	-0.876008	7.03544	0.234065	0.400688
ecl8_04331	lplA	Lipoate-protein ligase A	-0.874572	7.50603	0.122138	0.253483
ecl8_00343	pckA_1	Phosphoenolpyruvate carboxykinase (ATP)	-0.873997	8.3285	0.0352963	0.0993822
ecl8_02058	ynhG	putative L,D-transpeptidase YnhG	-0.873946	6.92386	0.275871	0.448391
ecl8_01023	hokA_2	Protein HokA	-0.872863	7.55116	0.107435	0.232716
ecl8_01965	narK	Nitrate/nitrite transporter NarK	-0.871539	6.8442	0.293312	0.464715
ecl8_02924	ydjM	Inner membrane protein YdjM	-0.870125	5.96316	0.551034	0.702175
ecl8_03990	yaiY	Inner membrane protein YaiY	-0.868247	5.24717	0.596694	0.74233
ecl8_00195	ecl8_00195	hypothetical protein	-0.866121	9.67414	0.00958931	0.0343245
ecl8_03301	gpFI	Putative prophage major tail sheath protein	-0.866096	6.22217	0.480008	0.639437
ecl8_01441	fadL	Long-chain fatty acid transport protein	-0.865595	7.6458	0.108499	0.234112
ecl8_01344	cysA_1	Sulfate/thiosulfate import ATP-binding protein CysA	-0.864319	7.27487	0.191495	0.34704
ecl8_03886	pdeB	putative cyclic di-GMP phosphodiesterase PdeB	-0.863081	7.90985	0.0759269	0.179456
ecl8_04287	citB_2	Transcriptional regulatory protein CitB	-0.860993	7.57806	0.116493	0.245995
ecl8_00123	ecl8_00123	hypothetical protein	-0.860815	7.34417	0.16936	0.319791
ecl8_01849	ribZ_2	Riboflavin transporter RibZ	-0.860059	6.55787	0.389236	0.559215
ecl8_04597	ecl8_04597	hypothetical protein	-0.859974	6.4497	0.429618	0.597014
ecl8_05279	sopB	Protein SopB	-0.856291	10.1767	0.00784189	0.0289767
ecl8_01025	intA_2	Prophage integrase IntA	-0.855714	8.81487	0.0278247	0.0818591
ecl8_01727	ecl8_01727	hypothetical protein	-0.849405	7.22236	0.231056	0.39696
ecl8_04275	carA_2	Carbamoyl-phosphate synthase small chain	-0.847759	7.44448	0.183436	0.337788
ecl8_05271	ecl8_05271	hypothetical protein	-0.847582	5.85069	0.557584	0.7079
ecl8_02256	frmA	S-(hydroxymethyl)glutathione dehydrogenase	-0.844239	7.20841	0.235797	0.4021
ecl8_00992	relA	GTP pyrophosphokinase	-0.843394	7.78776	0.0922436	0.207258
ecl8_03370	gmuR	HTH-type transcriptional regulator GmuR	-0.843115	5.08471	0.569024	0.71853
ecl8_01774	fliY_1	L-cystine-binding protein FliY	-0.842416	6.09859	0.49938	0.657001
ecl8_03956	acpH	Acyl carrier protein phosphodiesterase	-0.841482	6.40476	0.452538	0.617412
ecl8_05102	ecl8_05102	hypothetical protein	-0.841378	7.02662	0.257878	0.427083
ecl8_00299	livK	Leucine-specific-binding protein	-0.841216	7.5944	0.116573	0.245995
ecl8_04661	ecl8_04661	hypothetical protein	-0.837513	6.8897	0.289743	0.461012
ecl8_03368	ecl8_03368	hypothetical protein	-0.836987	5.99052	0.522672	0.67749
ecl8_04366	glmS_1	Glutamine--fructose-6-phosphate aminotransferase [isomerizing]	-0.836494	8.35903	0.0801779	0.18683
ecl8_02053	sufB	FeS cluster assembly protein SufB	-0.831891	7.2586	0.224873	0.388433
ecl8_01582	cirA	Colicin I receptor	-0.830424	7.40431	0.166526	0.315776
ecl8_00324	glpD	Aerobic glycerol-3-phosphate dehydrogenase	-0.829992	8.03868	0.0657494	0.160436
ecl8_02509	carA_1	Caffeate CoA-transferase	-0.828793	6.47897	0.433727	0.600429
ecl8_00467	aaeA_1	p-hydroxybenzoic acid efflux pump subunit AaeA	-0.828188	7.70277	0.136196	0.274733
ecl8_02634	ecl8_02634	hypothetical protein	-0.827522	5.27886	0.626898	0.763627
ecl8_01856	mntP	putative manganese efflux pump MntP	-0.826892	5.85857	0.623087	0.76151
ecl8_00345	hslR	Heat shock protein 15	-0.826375	6.47795	0.450585	0.61569
ecl8_04746	ecl8_04746	hypothetical protein	-0.823593	6.25083	0.592016	0.738571
ecl8_04684	melA_2	Alpha-galactosidase	-0.823527	7.82194	0.173757	0.325043
ecl8_03361	ybiV	Sugar phosphatase YbiV	-0.820704	6.1302	0.611602	0.754974
ecl8_04780	rluF	23S rRNA pseudouridine(2604) synthase	-0.818846	7.68941	0.107787	0.233025
ecl8_00555	garD	Galactarate dehydratase (L-threo-forming)	-0.817225	8.45166	0.0398959	0.110041
ecl8_03411	ybhK	Putative gluconeogenesis factor	-0.816782	6.02697	0.527294	0.681281
ecl8_05003	fdoI	Formate dehydrogenase, cytochrome b556(fdo) subunit	-0.81614	7.60623	0.166137	0.315316
ecl8_00181	xylG_1	Xylose import ATP-binding protein XylG	-0.814149	9.18878	0.017921	0.0568881
ecl8_00839	fimC_2	Chaperone protein FimC	-0.812311	6.93622	0.284493	0.45724
ecl8_03023	smc	Chromosome partition protein Smc	-0.811919	7.79709	0.187648	0.342424
ecl8_00523	secG	Protein-export membrane protein SecG	-0.811664	5.52757	0.620261	0.7602
ecl8_01492	nuoF	NADH-quinone oxidoreductase subunit F	-0.811611	7.35521	0.184045	0.338277
ecl8_04961	ftsN	Cell division protein FtsN	-0.810847	7.47672	0.151909	0.297155
ecl8_01573	fruB_1	Multiphosphoryl transfer protein	-0.809111	6.58868	0.410904	0.57787
ecl8_01672	oatWY	Polysialic acid O-acetyltransferase	-0.808612	6.46638	0.447014	0.613288
ecl8_01491	nuoE	NADH-quinone oxidoreductase subunit E	-0.807896	6.11273	0.525095	0.679803
ecl8_02484	ecl8_02484	hypothetical protein	-0.80404	7.08237	0.334802	0.509109
ecl8_00869	yesO	Putative ABC transporter substrate-binding protein YesO	-0.797137	7.7386	0.129572	0.265331
ecl8_00020	mngR_1	Mannosyl-D-glycerate transport/metabolism system repressor MngR	-0.796698	7.40798	0.202142	0.360188
ecl8_03959	ecl8_03959	hypothetical protein	-0.795741	5.88853	0.608435	0.753028
ecl8_01981	adhE_4	Aldehyde-alcohol dehydrogenase	-0.794221	7.72782	0.136087	0.274637
ecl8_03340	ybjJ	Inner membrane protein YbjJ	-0.793448	7.05628	0.272535	0.444955
ecl8_03131	ecl8_03131	hypothetical protein	-0.792711	5.93427	0.559955	0.709488
ecl8_04111	yaeQ	putative protein YaeQ	-0.792579	6.79795	0.35266	0.525514
ecl8_01870	slp	Outer membrane protein slp	-0.791308	5.9759	0.549196	0.700433
ecl8_00543	ecl8_00543	hypothetical protein	-0.790893	6.85399	0.337626	0.512007
ecl8_01210	trxC	Thioredoxin 2	-0.790774	6.41003	0.495936	0.654207
ecl8_04068	dinB	DNA polymerase IV	-0.790591	7.46395	0.184824	0.339085
ecl8_04271	kefC_2	Glutathione-regulated potassium-efflux system protein KefC	-0.789446	8.1522	0.0715416	0.171795
ecl8_00120	ecl8_00120	hypothetical protein	-0.788516	9.56841	0.0959053	0.213335
ecl8_03335	xerD_3	Tyrosine recombinase XerD	-0.787154	7.92904	0.0924887	0.207599
ecl8_02193	ecl8_02193	hypothetical protein	-0.784982	4.80463	0.599069	0.744454
ecl8_04395	hpaB	4-hydroxyphenylacetate 3-monooxygenase oxygenase component	-0.784492	8.01136	0.0969501	0.215016
ecl8_04784	sorB_3	PTS system sorbose-specific EIIB component	-0.7842	8.68635	0.0337181	0.0958463
ecl8_02652	mlc_1	Protein mlc	-0.783336	5.78213	0.623551	0.76151
ecl8_00484	gltB	Glutamate synthase [NADPH] large chain	-0.782467	9.52975	0.0554049	0.141284
ecl8_04186	ecl8_04186	hypothetical protein	-0.781506	8.8713	0.068181	0.165445
ecl8_00534	truB	tRNA pseudouridine synthase B	-0.781028	7.40092	0.185578	0.340189
ecl8_00344	hslO	33 kDa chaperonin	-0.781005	7.66114	0.141447	0.282054
ecl8_01564	pdeN	putative cyclic di-GMP phosphodiesterase PdeN	-0.778664	7.33225	0.262668	0.433087
ecl8_00202	ecl8_00202	hypothetical protein	-0.776411	8.08697	0.08199	0.190357
ecl8_00630	mug	G/U mismatch-specific DNA glycosylase	-0.775828	6.95198	0.30864	0.481305
ecl8_02534	yraI_2	putative fimbrial chaperone YraI	-0.774549	6.91091	0.325722	0.498531
ecl8_00132	ecl8_00132	hypothetical protein	-0.77121	6.97495	0.306211	0.479247
ecl8_01809	yecN	Inner membrane protein YecN	-0.77039	5.41285	0.706541	0.820618
ecl8_03185	helD	DNA helicase IV	-0.767757	5.97115	0.69269	0.810228
ecl8_00723	ecl8_00723	hypothetical protein	-0.764878	5.74101	0.582353	0.729782
ecl8_04282	citS	Citrate-sodium symporter	-0.764828	8.49523	0.0572808	0.144826
ecl8_01199	yfiH	Polyphenol oxidase	-0.764454	6.54265	0.447213	0.613304
ecl8_03129	efeU	Ferrous iron permease EfeU	-0.760729	6.02048	0.589585	0.73595
ecl8_01021	edcC	Phenolic acid decarboxylase subunit C	-0.758766	7.92721	0.112358	0.239999
ecl8_00595	lsrG	(4S)-4-hydroxy-5-phosphonooxypentane-2,3-dione isomerase	-0.758055	5.26482	0.710654	0.823729
ecl8_04183	gcd	Quinoprotein glucose dehydrogenase	-0.757358	8.44217	0.0929885	0.208511
ecl8_03957	ahpC_2	Alkyl hydroperoxide reductase C	-0.755663	8.66014	0.0407964	0.111972
ecl8_01833	holE	DNA polymerase III subunit theta	-0.755379	4.88067	0.710914	0.823729
ecl8_02293	ydcY	putative protein YdcY	-0.755263	4.97973	0.713874	0.82506
ecl8_01162	ecl8_01162	hypothetical protein	-0.753844	6.00801	0.595096	0.740963
ecl8_04981	rbsC_9	Ribose import permease protein RbsC	-0.753816	7.79573	0.142837	0.284271
ecl8_03260	macB	Macrolide export ATP-binding/permease protein MacB	-0.753082	7.64935	0.215906	0.377772
ecl8_00762	ecl8_00762	hypothetical protein	-0.752799	6.48384	0.470144	0.63025
ecl8_02135	acrB_2	Multidrug efflux pump subunit AcrB	-0.752334	9.43367	0.0349145	0.0984938
ecl8_00197	hokA_1	Protein HokA	-0.750963	6.74151	0.403707	0.572143
ecl8_00327	glpR_1	Glycerol-3-phosphate regulon repressor	-0.749895	7.31888	0.399974	0.56884
ecl8_04199	aroP_2	Aromatic amino acid transport protein AroP	-0.749198	7.94133	0.152361	0.297391
ecl8_02271	rob_2	Right origin-binding protein	-0.746939	6.5524	0.461642	0.624106
ecl8_01754	oxyR_2	Hydrogen peroxide-inducible genes activator	-0.744666	6.71153	0.426027	0.593404
ecl8_00300	livH_1	High-affinity branched-chain amino acid transport system permease protein LivH	-0.744581	7.4107	0.409104	0.576407
ecl8_03897	amtB	Ammonia channel	-0.743697	7.85285	0.227767	0.392368
ecl8_04177	icaB	Poly-beta-1,6-N-acetyl-D-glucosamine N-deacetylase	-0.74356	7.94262	0.111633	0.238793
ecl8_04576	msrA	Peptide methionine sulfoxide reductase MsrA	-0.743122	7.68823	0.217615	0.379719
ecl8_02456	ecl8_02456	hypothetical protein	-0.74245	7.03178	0.309594	0.481825
ecl8_01673	wcaJ	UDP-glucose:undecaprenyl-phosphate glucose-1-phosphate transferase	-0.742333	8.34411	0.152191	0.297315
ecl8_04440	cusC_2	Cation efflux system protein CusC	-0.740684	8.18561	0.129568	0.265331
ecl8_02656	ypwA	Carboxypeptidase 1	-0.738863	6.57143	0.463256	0.625151
ecl8_04303	ecl8_04303	hypothetical protein	-0.736774	6.5685	0.474233	0.633826
ecl8_01664	ecl8_01664	hypothetical protein	-0.736211	9.15254	0.098453	0.217808
ecl8_04742	mltF_2	Membrane-bound lytic murein transglycosylase F	-0.735399	9.08284	0.0701618	0.169238
ecl8_04298	nhaR	Transcriptional activator protein NhaR	-0.734431	7.44334	0.211451	0.372021
ecl8_01997	ecl8_01997	hypothetical protein	-0.73328	6.00165	0.568875	0.71853
ecl8_03208	pncB	Nicotinate phosphoribosyltransferase	-0.731426	7.32393	0.458302	0.621095
ecl8_00782	evgA_2	DNA-binding transcriptional activator EvgA	-0.730119	5.60297	0.608963	0.753182
ecl8_02000	bin3	Putative transposon Tn552 DNA-invertase bin3	-0.729475	7.82147	0.227576	0.392191
ecl8_01803	yesR	Unsaturated rhamnogalacturonyl hydrolase YesR	-0.729111	6.89485	0.466203	0.627664
ecl8_00845	marR_1	Multiple antibiotic resistance protein MarR	-0.727881	5.39044	0.619409	0.759991
ecl8_04940	argH	Argininosuccinate lyase	-0.72238	8.74688	0.0725815	0.17348
ecl8_03746	ecl8_03746	hypothetical protein	-0.722308	8.95279	0.0438366	0.118134
ecl8_04952	ecl8_04952	hypothetical protein	-0.720416	6.31134	0.537297	0.689794
ecl8_00781	ecl8_00781	hypothetical protein	-0.719919	8.18071	0.255305	0.424426
ecl8_01164	ecl8_01164	hypothetical protein	-0.717212	6.78644	0.464955	0.626684
ecl8_01284	yofA_1	HTH-type transcriptional regulator YofA	-0.715841	6.78408	0.4087	0.576106
ecl8_03219	ecl8_03219	hypothetical protein	-0.71555	6.77027	0.496468	0.654329
ecl8_00863	kduD_1	2-dehydro-3-deoxy-D-gluconate 5-dehydrogenase	-0.714626	6.53601	0.479558	0.639028
ecl8_00215	ecl8_00215	hypothetical protein	-0.714592	8.28117	0.0976049	0.216361
ecl8_01536	rcsD	Phosphotransferase RcsD	-0.714442	8.22139	0.122081	0.253483
ecl8_03320	ecl8_03320	hypothetical protein	-0.714264	6.57145	0.623241	0.76151
ecl8_01003	cysG_2	Siroheme synthase	-0.714189	7.68947	0.201384	0.359414
ecl8_02921	ecl8_02921	hypothetical protein	-0.714133	5.69564	0.685781	0.805315
ecl8_01592	yohK_1	Inner membrane protein YohK	-0.713945	6.61642	0.643022	0.777301
ecl8_00690	lysN_1	2-aminoadipate transaminase	-0.71207	7.73986	0.157024	0.302517
ecl8_03052	pdxA2_2	D-erythronate 4-phosphate dehydrogenase	-0.711511	6.42682	0.581185	0.728933
ecl8_03329	ecl8_03329	hypothetical protein	-0.710455	6.47517	0.547239	0.698736
ecl8_04342	yjjG	Pyrimidine 5'-nucleotidase YjjG	-0.709203	6.87302	0.378753	0.548276
ecl8_05198	ecl8_05198	hypothetical protein	-0.70881	7.24516	0.284901	0.457565
ecl8_04820	vdcA_3	Diguanylate cyclase VdcA	-0.708787	8.85002	0.0763944	0.180228
ecl8_04537	mgtA	Magnesium-transporting ATPase, P-type 1	-0.705773	8.67723	0.0982771	0.217526
ecl8_01601	yohC	Inner membrane protein YohC	-0.70517	6.33597	0.533635	0.686722
ecl8_01443	fadI	3-ketoacyl-CoA thiolase FadI	-0.704755	7.62475	0.186548	0.341101
ecl8_00465	dmlR_3	HTH-type transcriptional regulator DmlR	-0.704737	7.23538	0.278503	0.450862
ecl8_01746	amn	AMP nucleosidase	-0.704618	7.6927	0.185773	0.340405
ecl8_00356	damX	Cell division protein DamX	-0.704356	6.92101	0.364363	0.535349
ecl8_04039	ecl8_04039	Aspartate aminotransferase	-0.704345	7.13453	0.318184	0.491208
ecl8_00481	sspB	Stringent starvation protein B	-0.703511	5.9379	0.600506	0.745825
ecl8_04066	pepD	Cytosol non-specific dipeptidase	-0.702505	8.05286	0.125401	0.25881
ecl8_03119	rocF	Arginase	-0.696922	7.34592	0.346678	0.520251
ecl8_03737	cadB	putative cadaverine/lysine antiporter	-0.696747	9.49706	0.0469526	0.124132
ecl8_03679	nodM	Glutamine--fructose-6-phosphate aminotransferase [isomerizing]	-0.696536	8.79872	0.119552	0.249277
ecl8_03147	agp_1	Glucose-1-phosphatase	-0.69391	6.82002	0.451026	0.616103
ecl8_04545	nrdD	Anaerobic ribonucleoside-triphosphate reductase	-0.693725	8.18958	0.161692	0.308579
ecl8_02279	appC	Cytochrome bd-II ubiquinol oxidase subunit 1	-0.69348	7.51075	0.223618	0.387164
ecl8_04644	ecl8_04644	hypothetical protein	-0.693261	6.6299	0.473903	0.633576
ecl8_04880	ecl8_04880	hypothetical protein	-0.692769	6.67192	0.473061	0.632829
ecl8_01693	hisB	Histidine biosynthesis bifunctional protein HisB	-0.687374	6.84396	0.406346	0.57432
ecl8_04524	ecl8_04524	hypothetical protein	-0.685724	7.18385	0.322127	0.494896
ecl8_04430	ecl8_04430	hypothetical protein	-0.685702	7.99082	0.139435	0.279247
ecl8_00873	ecl8_00873	hypothetical protein	-0.684781	8.40154	0.154146	0.299561
ecl8_03286	potH	Putrescine transport system permease protein PotH	-0.684478	6.01619	0.648443	0.77939
ecl8_03372	ybiR	Inner membrane protein YbiR	-0.683743	6.4511	0.536066	0.688809
ecl8_01020	ecdB	putative UbiX-like flavin prenyltransferase	-0.683221	6.68633	0.502567	0.658878
ecl8_04993	ecl8_04993	hypothetical protein	-0.68243	6.40537	0.698949	0.814984
ecl8_04963	hslU	ATP-dependent protease ATPase subunit HslU	-0.682264	8.87323	0.186776	0.341263
ecl8_01572	setB	Sugar efflux transporter B	-0.681982	7.04045	0.347364	0.520549
ecl8_01499	nuoM	NADH-quinone oxidoreductase subunit M	-0.680735	6.91812	0.391854	0.561628
ecl8_04323	yjjX	Non-canonical purine NTP phosphatase	-0.675663	5.74926	0.703823	0.819239
ecl8_01635	hxpB_1	Hexitol phosphatase B	-0.672953	5.27143	0.647471	0.77939
ecl8_00464	tldD	Metalloprotease TldD	-0.672497	8.30446	0.118179	0.24757
ecl8_03371	bglA_3	Aryl-phospho-beta-D-glucosidase BglA	-0.671205	6.88492	0.403329	0.57197
ecl8_03804	ecl8_03804	hypothetical protein	-0.670741	7.16327	0.362069	0.533651
ecl8_03965	ycaC_2	putative hydrolase YcaC	-0.67061	8.50839	0.113071	0.240694
ecl8_02663	tqsA	AI-2 transport protein TqsA	-0.67047	5.86499	0.62397	0.761605
ecl8_04630	artJ_3	ABC transporter arginine-binding protein 1	-0.669621	7.11057	0.385591	0.555829
ecl8_00668	ygiW_1	Protein YgiW	-0.668736	6.23528	0.583729	0.7313
ecl8_04941	argB	Acetylglutamate kinase	-0.667155	7.9527	0.155845	0.301525
ecl8_04729	ecl8_04729	hypothetical protein	-0.66715	7.92974	0.197677	0.355214
ecl8_00697	cbs	Putative cystathionine beta-synthase	-0.667014	7.31934	0.272047	0.444444
ecl8_00856	pdxI	Pyridoxine 4-dehydrogenase	-0.666548	8.5459	0.0743564	0.176681
ecl8_03343	ybjG	Putative undecaprenyl-diphosphatase YbjG	-0.666148	6.67296	0.503618	0.659853
ecl8_03280	artJ_2	ABC transporter arginine-binding protein 1	-0.665342	5.54451	0.644883	0.777915
ecl8_02253	ecl8_02253	hypothetical protein	-0.664051	5.45314	0.741567	0.845231
ecl8_02930	chbR	HTH-type transcriptional regulator ChbR	-0.66344	7.83333	0.185886	0.340472
ecl8_04526	rraB	Regulator of ribonuclease activity B	-0.662204	6.44087	0.597564	0.743206
ecl8_01236	glrR	Transcriptional regulatory protein GlrR	-0.661752	7.56217	0.397511	0.566602
ecl8_01571	ecl8_01571	hypothetical protein	-0.661652	8.9648	0.0605879	0.151046
ecl8_00734	galP	Galactose-proton symporter	-0.660832	7.83623	0.163766	0.311669
ecl8_03268	poxB	Pyruvate dehydrogenase [ubiquinone]	-0.660753	7.38753	0.40534	0.574092
ecl8_03680	frlB_1	Fructosamine deglycase FrlB	-0.660672	8.67602	0.0750413	0.177769
ecl8_00679	yghB	Inner membrane protein YghB	-0.658361	7.35205	0.282329	0.454745
ecl8_01450	yfcA	putative membrane transporter protein YfcA	-0.657564	6.12912	0.606196	0.751009
ecl8_03297	ecl8_03297	hypothetical protein	-0.657145	5.50133	0.711995	0.824162
ecl8_03524	asnB	Asparagine synthetase B [glutamine-hydrolyzing]	-0.656815	7.44263	0.252293	0.421276
ecl8_00151	tdh	L-threonine 3-dehydrogenase	-0.65667	7.72225	0.190103	0.345361
ecl8_01560	yejF_2	putative ABC transporter ATP-binding protein YejF	-0.656037	6.86491	0.624258	0.761749
ecl8_01381	guaD_1	Guanine deaminase	-0.654086	5.47394	0.66587	0.791744
ecl8_03544	ecl8_03544	hypothetical protein	-0.653577	6.96216	0.4023	0.571056
ecl8_03062	ycfS	putative L,D-transpeptidase YcfS	-0.65321	6.32549	0.572465	0.720427
ecl8_00336	feoC	putative [Fe-S]-dependent transcriptional repressor	-0.652943	6.04893	0.626825	0.763627
ecl8_05083	ecl8_05083	hypothetical protein	-0.6506	7.31714	0.322883	0.495137
ecl8_03019	icd_1	Isocitrate dehydrogenase [NADP]	-0.6494	6.7151	0.510088	0.666088
ecl8_00843	xerC_1	Tyrosine recombinase XerC	-0.648661	9.32298	0.0622523	0.153991
ecl8_04810	nfi	Endonuclease V	-0.647613	7.29955	0.298669	0.470773
ecl8_04134	map_2	Methionine aminopeptidase	-0.646111	6.22809	0.586599	0.733455
ecl8_05270	ecl8_05270	hypothetical protein	-0.645951	7.10543	0.356456	0.528873
ecl8_01595	oprB	Porin B	-0.645718	8.79231	0.0775504	0.182378
ecl8_04999	fdhD	Sulfur carrier protein FdhD	-0.645484	7.6999	0.201904	0.360049
ecl8_00626	evgA_1	DNA-binding transcriptional activator EvgA	-0.644303	8.99042	0.0879458	0.200428
ecl8_03277	artI	Putative ABC transporter arginine-binding protein 2	-0.643713	6.07208	0.619063	0.759775
ecl8_04396	hpaC	4-hydroxyphenylacetate 3-monooxygenase reductase component	-0.642569	7.94906	0.302973	0.475796
ecl8_01576	nfo	Endonuclease 4	-0.640926	6.15854	0.600779	0.745956
ecl8_01662	ecl8_01662	hypothetical protein	-0.640432	7.85809	0.198043	0.355711
ecl8_00549	ecl8_00549	Putative two-component membrane permease complex subunit SMU_747c	-0.636144	7.72609	0.215602	0.37756
ecl8_04984	rhaM	L-rhamnose mutarotase	-0.635662	6.57762	0.620106	0.7602
ecl8_00369	fic	putative adenosine monophosphate-protein transferase fic	-0.635492	7.14334	0.39262	0.56167
ecl8_04358	yjjP	Inner membrane protein YjjP	-0.635333	7.54509	0.242961	0.410613
ecl8_02927	katE	Catalase HPII	-0.635261	7.23081	0.330495	0.504107
ecl8_02838	ecl8_02838	hypothetical protein	-0.633819	5.13879	0.712909	0.824378
ecl8_04611	rlmB	23S rRNA (guanosine-2'-O-)-methyltransferase RlmB	-0.631681	7.09368	0.372531	0.543325
ecl8_04994	fbaA_2	putative fructose-bisphosphate aldolase	-0.631644	10.5782	0.0427196	0.115924
ecl8_03571	dsbG	Thiol:disulfide interchange protein DsbG	-0.629476	7.53944	0.246823	0.415721
ecl8_04559	pmbA	Metalloprotease PmbA	-0.629246	8.14114	0.173818	0.325043
ecl8_01444	fadJ	Fatty acid oxidation complex subunit alpha	-0.628347	7.89366	0.246183	0.414956
ecl8_00331	gntT	High-affinity gluconate transporter	-0.627413	8.19549	0.148626	0.291885
ecl8_04260	cimH	Citrate/malate transporter	-0.626173	8.72777	0.113619	0.241305
ecl8_03003	vdcC	Phenolic acid decarboxylase subunit C	-0.624956	5.22408	0.758211	0.854333
ecl8_02704	ydgI	Putative arginine/ornithine antiporter	-0.624863	6.63691	0.529534	0.682973
ecl8_04541	licC_6	Lichenan permease IIC component	-0.622925	7.33567	0.307633	0.480575
ecl8_04588	ytfF	Inner membrane protein YtfF	-0.62007	8.09607	0.183828	0.338091
ecl8_05127	ecl8_05127	hypothetical protein	-0.619876	8.20799	0.295385	0.467003
ecl8_04203	ampD	1,6-anhydro-N-acetylmuramyl-L-alanine amidase AmpD	-0.618139	6.53765	0.666763	0.792213
ecl8_01832	exoX	Exodeoxyribonuclease 10	-0.618055	6.61312	0.537153	0.689794
ecl8_01908	livF_2	High-affinity branched-chain amino acid transport ATP-binding protein LivF	-0.617875	5.76821	0.655461	0.785519
ecl8_03911	clpX	ATP-dependent Clp protease ATP-binding subunit ClpX	-0.61744	7.00513	0.406033	0.57432
ecl8_04402	ecl8_04402	hypothetical protein	-0.61495	7.23963	0.340968	0.515185
ecl8_00867	sacA	Sucrose-6-phosphate hydrolase	-0.61464	8.91647	0.0944331	0.211161
ecl8_03104	ecl8_03104	hypothetical protein	-0.614555	6.46229	0.572447	0.720427
ecl8_04525	ecl8_04525	hypothetical protein	-0.614315	7.52425	0.288086	0.460176
ecl8_04950	metF	5,10-methylenetetrahydrofolate reductase	-0.614242	8.23819	0.15614	0.301596
ecl8_00196	ecl8_00196	hypothetical protein	-0.613854	7.44043	0.298537	0.470773
ecl8_01238	hmp	Flavohemoprotein	-0.611556	7.10312	0.383198	0.55296
ecl8_02457	ecl8_02457	hypothetical protein	-0.610965	6.58639	0.53897	0.691544
ecl8_02659	ecl8_02659	hypothetical protein	-0.610355	6.08499	0.642183	0.77682
ecl8_02248	ydgJ_1	putative oxidoreductase YdgJ	-0.609545	6.75923	0.669004	0.792905
ecl8_04306	mog	Molybdopterin adenylyltransferase	-0.608569	7.17274	0.418333	0.58543
ecl8_04838	birA_2	Bifunctional ligase/repressor BirA	-0.607772	6.08387	0.749373	0.850866
ecl8_03743	htrE_2	Outer membrane usher protein HtrE	-0.607361	8.62293	0.135656	0.273938
ecl8_00305	ugpA_1	sn-glycerol-3-phosphate transport system permease protein UgpA	-0.607068	7.75981	0.288312	0.460176
ecl8_05244	ecl8_05244	hypothetical protein	-0.604925	7.63022	0.237628	0.404486
ecl8_04995	ulaA_4	Ascorbate-specific PTS system EIIC component	-0.602162	10.4532	0.0569286	0.14418
ecl8_03936	thiI	tRNA sulfurtransferase	-0.601238	7.3232	0.357599	0.529473
ecl8_01551	glcR_1	HTH-type transcriptional repressor GlcR	-0.60066	5.41036	0.718039	0.827293
ecl8_04322	pspB_2	Putative phosphoserine phosphatase 2	-0.599959	7.0494	0.407257	0.574634
ecl8_01471	hisP	Histidine transport ATP-binding protein HisP	-0.599491	5.94896	0.676645	0.799004
ecl8_03751	ecl8_03751	hypothetical protein	-0.599164	6.52632	0.594622	0.740579
ecl8_00731	rsmE	Ribosomal RNA small subunit methyltransferase E	-0.598664	7.08674	0.419289	0.586032
ecl8_04405	rhaR_1	HTH-type transcriptional activator RhaR	-0.598035	7.28724	0.362578	0.534204
ecl8_02894	yciN	Protein YciN	-0.596834	5.0997	0.721694	0.830218
ecl8_05206	yrdA_3	Protein YrdA	-0.594592	6.86701	0.462644	0.624892
ecl8_03417	livF_4	High-affinity branched-chain amino acid transport ATP-binding protein LivF	-0.593281	5.456	0.678778	0.800251
ecl8_03888	rcnA	Nickel/cobalt efflux system RcnA	-0.592773	7.37079	0.323483	0.495786
ecl8_04715	ecl8_04715	hypothetical protein	-0.588872	8.48484	0.124456	0.257428
ecl8_02251	ecl8_02251	putative HTH-type transcriptional regulator	-0.58735	6.5082	0.571009	0.719407
ecl8_03879	ptsG_2	PTS system glucose-specific EIICB component	-0.586573	7.12865	0.40637	0.57432
ecl8_05183	copA_2	Copper resistance protein A	-0.5865	7.78552	0.234857	0.401327
ecl8_04311	ecl8_04311	hypothetical protein	-0.585588	7.52574	0.279173	0.451781
ecl8_03033	phoP_3	Virulence transcriptional regulatory protein PhoP	-0.584699	5.41556	0.684728	0.804501
ecl8_04279	citE	Citrate lyase subunit beta	-0.584318	7.08044	0.433718	0.600429
ecl8_03806	ecl8_03806	hypothetical protein	-0.584081	5.84659	0.72554	0.832709
ecl8_04875	rarD	Protein RarD	-0.583942	7.85984	0.219707	0.382472
ecl8_03200	zapC	Cell division protein ZapC	-0.583469	6.86218	0.494855	0.653555
ecl8_00823	arsR2	Arsenic resistance transcriptional regulator ArsR2	-0.582641	6.97836	0.460708	0.623221
ecl8_01303	bamC	Outer membrane protein assembly factor BamC	-0.582502	7.34877	0.337382	0.511925
ecl8_01701	fusA_2	Elongation factor G	-0.581011	7.98465	0.204963	0.363908
ecl8_04429	yhhJ	Inner membrane transport permease YhhJ	-0.580693	8.20835	0.177415	0.330109
ecl8_00301	ecl8_00301	hypothetical protein	-0.580394	7.39087	0.517451	0.672641
ecl8_01591	cdd	Cytidine deaminase	-0.57994	6.66323	0.540322	0.692682
ecl8_03236	aroA	3-phosphoshikimate 1-carboxyvinyltransferase	-0.57884	7.43977	0.317595	0.490809
ecl8_02639	por_2	Polyol:NADP oxidoreductase	-0.578338	6.08949	0.644287	0.777915
ecl8_04683	melB	Melibiose carrier protein	-0.577782	8.70517	0.121501	0.252395
ecl8_05261	ecl8_05261	hypothetical protein	-0.577139	7.78949	0.241699	0.409254
ecl8_03814	kilR	Killing protein KilR	-0.575653	7.54617	0.286497	0.458972
ecl8_04206	epsE_2	Type II secretion system protein E	-0.575285	7.88698	0.251238	0.419986
ecl8_01166	ecl8_01166	hypothetical protein	-0.574293	8.04203	0.300988	0.473678
ecl8_04350	vdcA_2	Diguanylate cyclase VdcA	-0.570514	10.6116	0.0989554	0.218486
ecl8_03322	ecl8_03322	hypothetical protein	-0.569188	8.11451	0.284783	0.45754
ecl8_00112	trmH	tRNA (guanosine(18)-2'-O)-methyltransferase	-0.568108	7.53087	0.294674	0.46621
ecl8_01670	wzxC	Lipopolysaccharide biosynthesis protein WzxC	-0.56725	7.30096	0.433763	0.600429
ecl8_03053	eryH	L-erythrulose-1-phosphate isomerase	-0.567078	6.65577	0.55668	0.707367
ecl8_00685	clcD_1	Carboxymethylenebutenolidase	-0.565721	6.10698	0.648979	0.779629
ecl8_00475	degQ	Periplasmic pH-dependent serine endoprotease DegQ	-0.564667	8.00505	0.348481	0.521377
ecl8_03270	ecl8_03270	hypothetical protein	-0.562427	7.00629	0.467675	0.629209
ecl8_00219	dppA_1	Periplasmic dipeptide transport protein	-0.562238	10.3333	0.073179	0.174627
ecl8_04401	yjiA	putative GTP-binding protein YjiA	-0.561765	8.19898	0.215704	0.377567
ecl8_04293	fkpB	FKBP-type 16 kDa peptidyl-prolyl cis-trans isomerase	-0.561305	5.71229	0.696795	0.81311
ecl8_04404	rpnA_5	Recombination-promoting nuclease RpnA	-0.56122	7.84755	0.315938	0.488756
ecl8_01686	ecl8_01686	hypothetical protein	-0.560829	7.64126	0.299912	0.472153
ecl8_03020	pdeH_3	Cyclic di-GMP phosphodiesterase PdeH	-0.557968	5.71015	0.742232	0.845773
ecl8_04944	ppc	Phosphoenolpyruvate carboxylase	-0.557277	9.91	0.143035	0.284352
ecl8_04373	ecl8_04373	hypothetical protein	-0.556511	5.24178	0.704876	0.82016
ecl8_04475	ecl8_04475	hypothetical protein	-0.554728	5.79178	0.687039	0.8062
ecl8_03904	sgrR_1	HTH-type transcriptional regulator SgrR	-0.550477	8.08583	0.208511	0.368558
ecl8_02199	ydfG_1	NADP-dependent 3-hydroxy acid dehydrogenase YdfG	-0.548011	6.14727	0.682604	0.803276
ecl8_01740	ecl8_01740	Putative 2-dehydropantoate 2-reductase	-0.547871	6.84216	0.5707	0.719401
ecl8_01821	mepM_1	Murein DD-endopeptidase MepM	-0.547569	7.54461	0.459006	0.621672
ecl8_04947	fsaB	Fructose-6-phosphate aldolase 2	-0.546831	7.3624	0.414377	0.581353
ecl8_04722	oxyR_4	Hydrogen peroxide-inducible genes activator	-0.54651	7.54922	0.316554	0.48954
ecl8_01347	ptsJ_1	Vitamin B6 salvage pathway transcriptional repressor PtsJ	-0.545165	6.97984	0.46318	0.625151
ecl8_00242	yhjJ	Protein YhjJ	-0.544747	8.60749	0.143568	0.285217
ecl8_03341	ybjI	5-amino-6-(5-phospho-D-ribitylamino)uracil phosphatase YbjI	-0.543764	6.31972	0.65547	0.785519
ecl8_00667	qseB	Transcriptional regulatory protein QseB	-0.542992	7.17984	0.456879	0.619979
ecl8_02134	ecl8_02134	hypothetical protein	-0.54281	5.55764	0.711357	0.823852
ecl8_03378	dps	DNA protection during starvation protein	-0.540997	6.30889	0.646845	0.779092
ecl8_02427	hsaD	4,5:9,10-diseco-3-hydroxy-5,9, 17-trioxoandrosta-1(10),2-diene-4-oate hydrolase	-0.539059	7.93591	0.253598	0.422347
ecl8_02224	aaeB_3	p-hydroxybenzoic acid efflux pump subunit AaeB	-0.538898	7.30881	0.387567	0.557709
ecl8_04955	metL	Bifunctional aspartokinase/homoserine dehydrogenase 2	-0.53795	9.32472	0.146716	0.289408
ecl8_04819	thiH	2-iminoacetate synthase	-0.537818	8.07021	0.359237	0.530529
ecl8_04589	ytfE	Iron-sulfur cluster repair protein YtfE	-0.536002	6.64223	0.630183	0.766703
ecl8_01787	secA_1	Protein translocase subunit SecA	-0.534879	5.91692	0.787619	0.874697
ecl8_04618	hflK	Modulator of FtsH protease HflK	-0.53424	8.5412	0.15048	0.295007
ecl8_00770	fldB	Flavodoxin 2	-0.534109	5.869	0.698565	0.814749
ecl8_03387	bhsA_5	Multiple stress resistance protein BhsA	-0.533246	5.79926	0.78962	0.875415
ecl8_04057	csiD	Protein CsiD	-0.529717	6.45492	0.638841	0.774458
ecl8_04763	ecl8_04763	hypothetical protein	-0.52943	7.47032	0.368203	0.538775
ecl8_00111	recG	ATP-dependent DNA helicase RecG	-0.529049	7.82258	0.27256	0.444955
ecl8_01669	ecl8_01669	hypothetical protein	-0.528327	8.17711	0.247593	0.416704
ecl8_03262	recF_3	DNA replication and repair protein RecF	-0.527671	7.75371	0.323726	0.495987
ecl8_04992	ulaC_4	Ascorbate-specific PTS system EIIA component	-0.526873	9.50999	0.129028	0.264582
ecl8_01171	ecl8_01171	hypothetical protein	-0.525889	6.119	0.734465	0.840464
ecl8_03913	tig	Trigger factor	-0.525657	7.61237	0.403178	0.57197
ecl8_01429	ecl8_01429	hypothetical protein	-0.525357	6.21419	0.7244	0.832043
ecl8_00201	pcaK_2	4-hydroxybenzoate transporter PcaK	-0.524755	8.43026	0.265961	0.43674
ecl8_04568	ytfQ_2	ABC transporter periplasmic-binding protein YtfQ	-0.524292	7.03369	0.464673	0.626493
ecl8_03825	xerD_4	Tyrosine recombinase XerD	-0.522879	7.18522	0.437193	0.603474
ecl8_02056	sufS	Cysteine desulfurase	-0.522833	6.93791	0.572132	0.720414
ecl8_04563	mpl	UDP-N-acetylmuramate--L-alanyl-gamma-D-glutamyl- meso-2,6-diaminoheptandioate ligase	-0.521229	7.91185	0.278129	0.450419
ecl8_04336	nupX	Putative nucleoside permease NupX	-0.519342	7.82804	0.297001	0.469059
ecl8_03162	gabD_2	Succinate-semialdehyde dehydrogenase [NADP(+)] GabD	-0.518597	6.39354	0.640816	0.776009
ecl8_01252	trmJ	tRNA (cytidine/uridine-2'-O-)-methyltransferase TrmJ	-0.515915	6.94004	0.676595	0.799004
ecl8_03935	ecl8_03935	hypothetical protein	-0.515473	5.92314	0.714157	0.825166
ecl8_04824	rpoC	DNA-directed RNA polymerase subunit beta'	-0.514848	5.67583	0.753611	0.852827
ecl8_01365	ecl8_01365	hypothetical protein	-0.512878	6.24247	0.68343	0.804001
ecl8_00768	sdhE	FAD assembly factor SdhE	-0.510957	5.77955	0.705292	0.82016
ecl8_03430	ybhC	Putative acyl-CoA thioester hydrolase YbhC	-0.510629	7.12529	0.614663	0.75756
ecl8_00548	ecl8_00548	hypothetical protein	-0.509762	6.3756	0.734566	0.840464
ecl8_04399	btsT	Pyruvate/proton symporter BtsT	-0.503003	8.85817	0.307001	0.479783
ecl8_03246	dmsA_1	Dimethyl sulfoxide reductase DmsA	-0.502384	7.23564	0.44704	0.613288
ecl8_00182	xylF_1	D-xylose-binding periplasmic protein	-0.502114	9.9311	0.117881	0.24757
ecl8_05228	dppA_4	Periplasmic dipeptide transport protein	-0.501191	8.39815	0.205869	0.365224
ecl8_00544	ecl8_00544	hypothetical protein	-0.500322	6.98691	0.504968	0.6613
ecl8_04607	ecl8_04607	Thermostable monoacylglycerol lipase	-0.500095	7.00078	0.58541	0.732538
ecl8_00203	ghrB	Glyoxylate/hydroxypyruvate reductase B	-0.499737	7.75899	0.331947	0.506112
ecl8_04310	ecl8_04310	hypothetical protein	-0.498567	9.77116	0.135635	0.273938
ecl8_01205	kgtP_1	Alpha-ketoglutarate permease	-0.497695	7.05658	0.671821	0.794944
ecl8_03677	sorC_3	PTS system sorbose-specific EIIC component	-0.497067	6.70218	0.633274	0.769591
ecl8_04915	ppiC_2	Peptidyl-prolyl cis-trans isomerase C	-0.494688	6.72278	0.628187	0.764869
ecl8_00355	aroB	3-dehydroquinate synthase	-0.494554	6.67845	0.626641	0.763627
ecl8_00109	fpr	Flavodoxin/ferredoxin--NADP reductase	-0.493804	7.63836	0.337458	0.511925
ecl8_00773	recJ	Single-stranded-DNA-specific exonuclease RecJ	-0.493562	7.89422	0.309588	0.481825
ecl8_03416	uvrB	UvrABC system protein B	-0.493183	7.85643	0.330192	0.503989
ecl8_03431	ctpF_1	putative cation-transporting ATPase F	-0.489257	7.94061	0.289187	0.460634
ecl8_00842	xerD_2	Tyrosine recombinase XerD	-0.489109	8.70485	0.208574	0.368558
ecl8_03690	yegT	Putative nucleoside transporter YegT	-0.486614	7.82881	0.45545	0.618924
ecl8_04716	fimF_3	Protein FimF	-0.486363	7.32032	0.423899	0.590809
ecl8_01971	lrpC	HTH-type transcriptional regulator LrpC	-0.482768	5.96108	0.724186	0.832043
ecl8_03678	manZ_2	PTS system mannose-specific EIID component	-0.480132	7.16597	0.524727	0.679524
ecl8_02368	acr1	Fatty acyl-CoA reductase	-0.479437	6.84968	0.610903	0.754974
ecl8_05263	ecl8_05263	hypothetical protein	-0.478473	8.48193	0.23828	0.405158
ecl8_03159	dmlA	D-malate dehydrogenase [decarboxylating]	-0.477813	6.98733	0.528607	0.682172
ecl8_00260	uspB	Universal stress protein B	-0.477134	8.66941	0.235279	0.40174
ecl8_03216	aspC	Aspartate aminotransferase	-0.476752	6.7818	0.655578	0.785519
ecl8_03054	sorC_1	Sorbitol operon regulator	-0.476096	5.5026	0.743618	0.846704
ecl8_00108	ecl8_00108	hypothetical protein	-0.475782	6.74045	0.599841	0.745206
ecl8_00997	queE	7-carboxy-7-deazaguanine synthase	-0.475173	7.02178	0.513444	0.668797
ecl8_03257	clpA	ATP-dependent Clp protease ATP-binding subunit ClpA	-0.474989	7.72496	0.342811	0.516532
ecl8_03397	ecl8_03397	hypothetical protein	-0.474241	7.0034	0.540323	0.692682
ecl8_04308	alsT	Amino-acid carrier protein AlsT	-0.473468	8.3195	0.407076	0.574634
ecl8_00868	ecl8_00868	hypothetical protein	-0.47303	9.17695	0.221923	0.385126
ecl8_03740	lpxL_2	Lipid A biosynthesis lauroyltransferase	-0.472746	7.55015	0.411642	0.578609
ecl8_04778	panS	Pantothenate precursors transporter PanS	-0.471883	8.05276	0.28538	0.457841
ecl8_04403	sad_2	Succinate semialdehyde dehydrogenase [NAD(P)+] Sad	-0.471621	8.06777	0.286962	0.459551
ecl8_00298	panM	PanD regulatory factor	-0.470977	6.50461	0.655142	0.785519
ecl8_00872	lacF	Lactose transport system permease protein LacF	-0.470142	9.26431	0.198114	0.355711
ecl8_04584	cpdB	2',3'-cyclic-nucleotide 2'-phosphodiesterase/3'-nucleotidase	-0.469462	8.37589	0.238993	0.406215
ecl8_00840	lpfA	putative major fimbrial subunit LpfA	-0.468355	6.58425	0.643606	0.777554
ecl8_01372	ecl8_01372	hypothetical protein	-0.466574	5.58355	0.745046	0.847896
ecl8_03032	virF	Virulence regulon transcriptional activator VirF	-0.46529	6.20382	0.697417	0.813622
ecl8_02522	malH	Maltose-6'-phosphate glucosidase	-0.465287	6.8434	0.622585	0.761374
ecl8_04542	licH_2	putative 6-phospho-beta-glucosidase	-0.464943	7.0175	0.561397	0.71071
ecl8_01250	ecl8_01250	hypothetical protein	-0.46226	6.91849	0.727096	0.833711
ecl8_03438	ymgC	putative protein YmgC	-0.462144	6.13238	0.727195	0.833711
ecl8_03949	birA_1	Bifunctional ligase/repressor BirA	-0.461116	6.40964	0.678441	0.800251
ecl8_03066	ecl8_03066	hypothetical protein	-0.459673	5.38783	0.767004	0.859723
ecl8_03865	mscK	Mechanosensitive channel MscK	-0.458673	9.29987	0.17525	0.32731
ecl8_00541	ecl8_00541	hypothetical protein	-0.455337	7.88621	0.399335	0.568294
ecl8_04599	ulaF	L-ribulose-5-phosphate 4-epimerase UlaF	-0.453323	7.65108	0.378653	0.548276
ecl8_04753	dusA	tRNA-dihydrouridine(20/20a) synthase	-0.452029	7.31419	0.455417	0.618924
ecl8_01305	ecl8_01305	hypothetical protein	-0.450792	7.24108	0.482418	0.640925
ecl8_00986	gudX	Glucarate dehydratase-related protein	-0.450764	7.48796	0.488096	0.646562
ecl8_00864	araE	Arabinose-proton symporter	-0.44827	8.28336	0.312402	0.485137
ecl8_00841	fim_1	Fimbrial subunit type 1	-0.44781	5.46892	0.765156	0.858288
ecl8_03345	dacC	D-alanyl-D-alanine carboxypeptidase DacC	-0.44646	6.65958	0.693006	0.810384
ecl8_02379	ydeP	Protein YdeP	-0.445009	7.95807	0.375463	0.545816
ecl8_00295	puuE	4-aminobutyrate aminotransferase PuuE	-0.444266	7.55296	0.413341	0.580333
ecl8_03148	ecl8_03148	putative HTH-type transcriptional regulator	-0.440377	4.95375	0.765118	0.858288
ecl8_03050	kdgT	2-keto-3-deoxygluconate permease	-0.440362	7.80041	0.389319	0.559215
ecl8_01877	ycgM	putative protein YcgM	-0.439654	6.64128	0.64703	0.779092
ecl8_04997	pfp	Pyrophosphate--fructose 6-phosphate 1-phosphotransferase	-0.438456	8.62909	0.265081	0.435776
ecl8_01048	mntB_1	Manganese transport system membrane protein MntB	-0.437427	6.93314	0.611294	0.754974
ecl8_00480	sspA	Stringent starvation protein A	-0.436623	5.22846	0.769163	0.861494
ecl8_03366	ecl8_03366	hypothetical protein	-0.435991	5.78447	0.756767	0.853508
ecl8_04904	wzzE	ECA polysaccharide chain length modulation protein	-0.435982	8.30597	0.289942	0.461012
ecl8_05173	cusR_2	Transcriptional regulatory protein CusR	-0.434614	7.00332	0.579325	0.727418
ecl8_03413	basR	Transcriptional regulatory protein BasR	-0.434461	5.9513	0.742606	0.845982
ecl8_01676	algC	Phosphomannomutase/phosphoglucomutase	-0.43405	8.30095	0.340446	0.514709
ecl8_01989	ecl8_01989	hypothetical protein	-0.433449	4.99642	0.835279	0.909508
ecl8_02646	ynfE	Putative dimethyl sulfoxide reductase chain YnfE	-0.433447	7.43666	0.468308	0.629491
ecl8_04327	nadR	Trifunctional NAD biosynthesis/regulator protein NadR	-0.433426	8.20876	0.318089	0.491208
ecl8_04803	purD	Phosphoribosylamine--glycine ligase	-0.432449	8.32707	0.327299	0.500442
ecl8_01221	lepA	Elongation factor 4	-0.431184	5.21316	0.836387	0.910492
ecl8_01992	yceI	Protein YceI	-0.430125	5.24841	0.773809	0.864742
ecl8_00720	xylF_2	D-xylose-binding periplasmic protein	-0.428716	7.43605	0.666195	0.791906
ecl8_04945	zinT	Metal-binding protein ZinT	-0.428175	8.21504	0.341075	0.515185
ecl8_03739	ecl8_03739	hypothetical protein	-0.427943	7.05323	0.571946	0.720384
ecl8_04942	argC	N-acetyl-gamma-glutamyl-phosphate reductase	-0.426181	8.59804	0.36337	0.534755
ecl8_04802	purH	Bifunctional purine biosynthesis protein PurH	-0.425302	8.20767	0.330444	0.504107
ecl8_01379	alaC	Glutamate-pyruvate aminotransferase AlaC	-0.424202	7.98566	0.350409	0.523735
ecl8_02278	cydB_1	Cytochrome bd-I ubiquinol oxidase subunit 2	-0.42203	6.66745	0.669406	0.792905
ecl8_04714	actP	Cation/acetate symporter ActP	-0.419975	8.61925	0.251689	0.420583
ecl8_02424	ecl8_02424	hypothetical protein	-0.416848	6.57793	0.671959	0.794944
ecl8_04051	pdhC	Dihydrolipoyllysine-residue acetyltransferase component of pyruvate dehydrogenase complex	-0.416426	8.1256	0.358999	0.530528
ecl8_04895	wzyE	putative ECA polymerase	-0.416303	6.05753	0.749699	0.85102
ecl8_00827	ecl8_00827	hypothetical protein	-0.414678	6.80112	0.622865	0.761507
ecl8_04663	dcuA	Anaerobic C4-dicarboxylate transporter DcuA	-0.413464	8.35484	0.298495	0.470773
ecl8_03315	ecl8_03315	hypothetical protein	-0.412961	5.00309	0.777395	0.866822
ecl8_00563	ecl8_00563	hypothetical protein	-0.411313	5.99054	0.780657	0.869563
ecl8_01751	acuR	Transcriptional regulator AcuR	-0.409363	6.42255	0.717872	0.827293
ecl8_00289	rsmD	Ribosomal RNA small subunit methyltransferase D	-0.408431	7.07469	0.57036	0.719401
ecl8_05104	rcsA_2	Transcriptional regulatory protein RcsA	-0.40727	6.80916	0.648257	0.77939
ecl8_05013	glnA	Glutamine synthetase	-0.407217	7.16284	0.552191	0.702946
ecl8_01575	fruA_1	PTS system fructose-specific EIIB'BC component	-0.40656	7.2763	0.517917	0.672854
ecl8_01276	ecl8_01276	hypothetical protein	-0.404096	7.22043	0.543303	0.695104
ecl8_02340	fdnG_2	Formate dehydrogenase, nitrate-inducible, major subunit	-0.402153	7.64784	0.532602	0.686136
ecl8_01035	ftsH_2	ATP-dependent zinc metalloprotease FtsH	-0.400927	9.77482	0.234269	0.400741
ecl8_03269	ltaE	Low specificity L-threonine aldolase	-0.40074	6.37609	0.778227	0.867507
ecl8_04320	ecl8_04320	hypothetical protein	-0.399185	7.10857	0.575459	0.723387
ecl8_04980	rbsA_4	Ribose import ATP-binding protein RbsA	-0.398873	8.66476	0.306188	0.479247
ecl8_02205	mdtK	Multidrug resistance protein MdtK	-0.397619	7.09322	0.587457	0.734115
ecl8_02748	yrdA_2	Protein YrdA	-0.396962	5.65108	0.774553	0.865141
ecl8_01188	ecl8_01188	hypothetical protein	-0.395928	6.74459	0.669535	0.792905
ecl8_00363	nasD_1	Nitrite reductase [NAD(P)H]	-0.395883	9.15596	0.347282	0.520549
ecl8_04590	cycA_2	D-serine/D-alanine/glycine transporter	-0.395792	8.76142	0.274317	0.446441
ecl8_00552	ecl8_00552	hypothetical protein	-0.395492	5.05608	0.817198	0.896165
ecl8_03225	ecl8_03225	hypothetical protein	-0.394981	5.97256	0.791461	0.877164
ecl8_00821	ecl8_00821	hypothetical protein	-0.39432	5.95065	0.764507	0.858218
ecl8_04948	gldA	Glycerol dehydrogenase	-0.393891	8.67349	0.303435	0.476354
ecl8_00199	cspA	Cold shock protein CspA	-0.392397	6.33602	0.774935	0.865351
ecl8_04110	arfB	Peptidyl-tRNA hydrolase ArfB	-0.391193	6.46557	0.715696	0.826088
ecl8_03051	denK	D-erythronate kinase	-0.389214	8.62217	0.289066	0.460634
ecl8_01449	mepA	Penicillin-insensitive murein endopeptidase	-0.388801	6.56145	0.706333	0.82059
ecl8_01212	ung	Uracil-DNA glycosylase	-0.388708	7.09561	0.736234	0.840656
ecl8_00323	malP_3	Maltodextrin phosphorylase	-0.387994	9.62709	0.289776	0.461012
ecl8_02383	mgtC	Protein MgtC	-0.386038	6.4547	0.724396	0.832043
ecl8_02928	chbG	Chitooligosaccharide deacetylase ChbG	-0.385131	5.61909	0.823686	0.900648
ecl8_03318	ecl8_03318	hypothetical protein	-0.384568	6.52989	0.705857	0.820465
ecl8_01826	edd	Phosphogluconate dehydratase	-0.383506	7.33032	0.530332	0.683805
ecl8_00825	arsC	Arsenate reductase	-0.381552	6.02999	0.84485	0.91546
ecl8_00758	ygfF	putative oxidoreductase YgfF	-0.38139	7.01991	0.60268	0.747692
ecl8_01850	kdgR_2	Transcriptional regulator KdgR	-0.378877	6.65277	0.699518	0.815433
ecl8_02282	spuE	Spermidine-binding periplasmic protein SpuE	-0.378842	7.43455	0.535469	0.68824
ecl8_04956	metB	Cystathionine gamma-synthase	-0.378573	8.69458	0.308504	0.481291
ecl8_00846	ecl8_00846	hypothetical protein	-0.378078	7.02568	0.615277	0.75756
ecl8_00985	gudP_1	putative glucarate transporter	-0.374659	8.35642	0.387308	0.557583
ecl8_02212	ydhP_1	Inner membrane transport protein YdhP	-0.373647	6.43637	0.735344	0.840464
ecl8_03523	nagD	Ribonucleotide monophosphatase NagD	-0.372963	6.95362	0.617931	0.759221
ecl8_01387	ecl8_01387	hypothetical protein	-0.372148	6.31901	0.815007	0.895805
ecl8_02281	lysN_2	2-aminoadipate transaminase	-0.371932	8.46369	0.341712	0.5154
ecl8_01005	cysN	Sulfate adenylyltransferase subunit 1	-0.371675	7.69228	0.468777	0.629553
ecl8_03405	ybhL	Inner membrane protein YbhL	-0.370229	6.88	0.645447	0.778236
ecl8_03432	uspG_2	Universal stress protein UP12	-0.369714	6.78016	0.678195	0.800198
ecl8_02358	maeA	NAD-dependent malic enzyme	-0.368243	7.75293	0.522261	0.677314
ecl8_02633	nimR_5	HTH-type transcriptional regulator NimR	-0.367768	6.28913	0.768307	0.860751
ecl8_04665	dsbD_2	Thiol:disulfide interchange protein DsbD	-0.367643	9.24542	0.287611	0.460176
ecl8_02239	rsxE	Electron transport complex subunit RsxE	-0.365335	5.18607	0.849077	0.917919
ecl8_03215	yedS	Outer membrane protein YedS	-0.364607	6.69783	0.712513	0.824334
ecl8_01209	ecl8_01209	hypothetical protein	-0.363874	6.38589	0.754397	0.852827
ecl8_04151	mrcB	Penicillin-binding protein 1B	-0.361155	8.73447	0.370426	0.541071
ecl8_04185	ecl8_04185	hypothetical protein	-0.359176	8.08466	0.431782	0.598802
ecl8_01596	bglG	Cryptic beta-glucoside bgl operon antiterminator	-0.35812	7.02187	0.621137	0.760854
ecl8_01687	ykoT	putative glycosyltransferase YkoT	-0.357757	8.46705	0.394049	0.563006
ecl8_02510	fabG_6	3-oxoacyl-[acyl-carrier-protein] reductase FabG	-0.355361	5.42456	0.831317	0.906965
ecl8_00858	ecl8_00858	hypothetical protein	-0.354401	7.02052	0.711066	0.823729
ecl8_02789	uspF	Universal stress protein F	-0.354088	6.82847	0.690736	0.808791
ecl8_03395	perR_1	HTH-type transcriptional regulator PerR	-0.354005	8.32513	0.417482	0.584606
ecl8_00204	ttuB_1	Putative tartrate transporter	-0.352468	8.26011	0.4124	0.579308
ecl8_03960	ulaA_2	Ascorbate-specific PTS system EIIC component	-0.349185	8.93426	0.341108	0.515185
ecl8_02744	ecl8_02744	hypothetical protein	-0.348942	6.26804	0.836986	0.910494
ecl8_01976	ecl8_01976	putative NTE family protein	-0.346732	6.51094	0.759039	0.854661
ecl8_04255	araD	L-ribulose-5-phosphate 4-epimerase AraD	-0.345233	7.70389	0.490415	0.64865
ecl8_02716	malX	PTS system maltose-specific EIICB component	-0.340776	6.55387	0.735689	0.840464
ecl8_01234	glrK	Sensor histidine kinase GlrK	-0.340167	8.05289	0.55227	0.702946
ecl8_02931	chbA_4	PTS system N,N'-diacetylchitobiose-specific EIIA component	-0.339688	5.64044	0.815336	0.895847
ecl8_04721	cidA	Holin-like protein CidA	-0.339264	6.43994	0.766229	0.85907
ecl8_02883	osmB	Osmotically-inducible lipoprotein B	-0.339154	6.35834	0.812096	0.893205
ecl8_01190	dgcN	Diguanylate cyclase DgcN	-0.33772	7.03533	0.640674	0.776009
ecl8_02185	appA_3	Oligopeptide-binding protein AppA	-0.337656	7.25779	0.66181	0.789739
ecl8_04067	yafP_2	putative N-acetyltransferase YafP	-0.336203	6.26553	0.775627	0.86569
ecl8_03153	puuA	Gamma-glutamylputrescine synthetase PuuA	-0.335563	6.56694	0.844242	0.915023
ecl8_04975	rhaS_2	HTH-type transcriptional activator RhaS	-0.335393	7.85162	0.480826	0.639571
ecl8_02711	fumC	Fumarate hydratase class II	-0.335178	6.47181	0.754788	0.852889
ecl8_02477	ecl8_02477	hypothetical protein	-0.333464	5.69894	0.820039	0.898396
ecl8_01665	ecl8_01665	Putative tyrosine-protein kinase in cps region	-0.332422	9.39198	0.426555	0.593768
ecl8_01553	nylB	6-aminohexanoate-dimer hydrolase	-0.330452	7.14009	0.645812	0.778465
ecl8_05238	ecl8_05238	hypothetical protein	-0.327886	7.83519	0.517067	0.672532
ecl8_01500	nuoN	NADH-quinone oxidoreductase subunit N	-0.32599	7.18113	0.640661	0.776009
ecl8_05246	ecl8_05246	hypothetical protein	-0.325492	6.15843	0.788885	0.875389
ecl8_04643	ecl8_04643	hypothetical protein	-0.325283	6.26856	0.815703	0.895847
ecl8_04408	mdtM_2	Multidrug resistance protein MdtM	-0.32526	7.97804	0.523964	0.678931
ecl8_02028	ppsR	Phosphoenolpyruvate synthase regulatory protein	-0.325077	7.80884	0.507135	0.663215
ecl8_01232	mltF_1	Membrane-bound lytic murein transglycosylase F	-0.322919	8.08838	0.458682	0.621422
ecl8_03393	fabG_12	3-oxoacyl-[acyl-carrier-protein] reductase FabG	-0.317623	7.77851	0.569597	0.719049
ecl8_04676	ecl8_04676	hypothetical protein	-0.313477	6.59532	0.758847	0.854661
ecl8_04272	kefF_2	Glutathione-regulated potassium-efflux system ancillary protein KefF	-0.312739	7.39526	0.622054	0.761141
ecl8_04617	hflC	Modulator of FtsH protease HflC	-0.311059	8.25146	0.500477	0.657863
ecl8_04731	ecl8_04731	hypothetical protein	-0.310307	6.822	0.716627	0.82687
ecl8_03412	eptA	Phosphoethanolamine transferase EptA	-0.309947	7.45272	0.593241	0.739407
ecl8_00056	pcaK_1	4-hydroxybenzoate transporter PcaK	-0.308574	8.40276	0.439045	0.605111
ecl8_02737	iolS_3	Aldo-keto reductase IolS	-0.308245	7.94565	0.645006	0.777915
ecl8_01770	dsrB	Protein DsrB	-0.307913	6.16681	0.800096	0.884369
ecl8_05247	ecl8_05247	hypothetical protein	-0.307274	6.42634	0.782201	0.870848
[truncated: 2,462 more rows]
